# Supplementary material
Source: PubMed Central journal article supplement (PMC2579366)
Supplement: 0802148105_0802148105SI.pdf [file 0802148105_0802148105SI.pdf]

# Supporting Information

Makarieva *et al.* 10.1073/pnas.0802148105

## SI Methods

Metabolic rates of 3,006 species across life's major domains were analyzed in the article, as listed in the accompanying [Datasets S1–S11](#). Here, we report additional information on data conversions used in our analyses.

**Mass Units Conversions.** To make the data reported on either wet or dry mass bases across different groups studied comparable, we chose the ratio of DM/WM = 0.3 for converting dry-mass based  $q_{DM}$  to wet-mass-based metabolic rates  $q$ ,  $q = q_{DM} \times 0.3$ . The value 0.3 was chosen as a crude mean for the DM/WM ratio of the nongelatinous groups where metabolic rates were reported on wet mass basis (letter W in the U column of Table 1).

Note that applying a single DM/WM = 0.3 ratio is conservative with respect to the main conclusion of the article about the narrow range of the observed mass-specific metabolic rates between the studied groups. Using a lower DM/WM (e.g., DM/WM = 0.15–0.20) for heterotrophic unicells or a DM/WM > 0.3 ratio for vascular plants would have left the observed range of mean taxonomic mass-specific metabolic rates (Table 1) essentially unchanged. Given the scarce information on DM/WM ratio across the groups, it seems unjustified to be very specific here, so a universal DM/WM = 0.3 ratio was applied.

**Further Details on Temperature Conversions: Information on  $Q_{10}$  Determination in Macroalgae seen in Dataset S9.** All nonendothermic data were adjusted to 25°C before analyses. No temperature adjustments of metabolic rates were performed for endothermic vertebrates. Endotherms do not live at body temperatures of 25°C, and very few ectotherms live at ambient temperatures in the vicinity of 40°C. Therefore, expression of endothermic and ectothermic metabolic rates at one and the same temperature (White *et al.*, 2006), which is fully relevant for testing recent models of metabolic rate dependence on body size and temperature, does not conform to the goal of the present study, which is to explore and describe the realistic range of metabolic rates. Noteworthy, the temperature of 25°C is representative of tropical forest habitats where the diversity of life forms is the greatest.

### On the Question of Minimal Metabolic Rates in Aquatic Organisms.

Because the buoyancy of the living matter is not precisely zero, to sustain their position in space aquatic organisms (unless they are bottom-dwellers) need to swim, i.e., they make periodical mechanical movements to adjust the position of their bodies in the water column. Terrestrial animals, helped by gravity, can remain in a given point of the Earth surface without locomotive energy expenditures.

The theoretical issue on what is the true “standard metabolism” in aquatic animals and how it compares with that of terrestrial animals is a big and important one. Metabolic rate measurements are characterized by some duration, i.e., the period during which metabolic rate is measured. For example, during a many hours' measurement the completely motionless state can be found as being unnatural or even health-detrimental for many terrestrial animals, especially the metabolically active ones like shrews. For such animals, too, locomotion can be thought of as an essential part of maintenance expenditures. At the other extreme, during short-term measurements in the order of several minutes many aquatic animals (otherwise periodically performing swimming movements) can be found motionless,

similar to terrestrial animals during standard metabolic rate measurements.

On a practical basis, with the advent of measurement facilities that allow for a long-term, high-resolution, real-time monitoring of metabolic rates, it became possible to discriminate such periods of minimal activity in aquatic animals; accordingly, these were sometimes thought of as representing the true standard metabolic rate or “minimal” metabolic rate (e.g., Steffensen 2002). For example, Kawall *et al.* (2001) studied Antarctic copepods making dozens of sequential 30-min runs of metabolic rate measurements for each individual. Mean minimum 30-min values were found to be approximately one-third as high as the mean—i.e., “routine”—metabolic rate in the studied species.

However, a great deal of data that are available in the literature (and which we make use of in our article) was obtained by standard techniques. Such data pertain to routine metabolic rate, i.e., the one that accounts for some swimming. Here, in the following paragraph we compare the existing data on “minimal” metabolic rate from the direct long-term, high-resolution measurements described above with the averages we obtained for the same aquatic taxa (see Table 1).

It is important to note that in our dataset we took the minimal (after temperature correction) value available in the literature for each species. When the directly measured minimum data of Kawall *et al.* (2001) were corrected for temperature and body size, these values appeared on average to be 50% lower than the copepod mean values we used in our study (see [Table S1](#)). Similarly, using data of Steffensen (2002) as “etalons” for minimal metabolic rate in fish, we found even better agreement with the established taxonomic mean from Table 1 ( $\approx 10\%$  lower on average). These data indicate that the elevation of the reported taxonomic means of metabolic rate in aquatic animals (Table 1) above the “minimal” metabolic rate is within several dozens of percent, i.e., it is significant, but is significantly smaller than the severalfold range of mean values among taxa and taxon groups discussed in the article.

Comparing terrestrial versus aquatic vertebrates, e.g., reptiles versus fish, as suggested by an anonymous referee, is a very interesting idea. For reptiles the mean taxonomic  $q$  (AMR) from Table 1 is  $0.30 \text{ W kg}^{-1}$  at mean body mass of 700 g, whereas for fish it is  $0.38 \text{ W kg}^{-1}$  at 400 g (data for 25°C). Using the established mass scaling coefficient  $\beta = -0.22$  for reptiles (Table 1), we calculate that at body mass of  $M = 400 \text{ g}$  the average reptile would have  $0.34 \text{ W kg}^{-1}$ , which is statistically indistinguishable from the fish mean.

As follows from [Table S1](#), our data for fish are very close to minimal rather than routine metabolic rates. This coincidence between reptile and fish average values hints that namely the minimal (rather than routine) metabolic rates of aquatic ectothermic vertebrates might be the relevant metabolic analogy of standard metabolic rate measured in motionless terrestrial ectothermic vertebrates. But clearly much more analysis is needed to reach a definitive conclusion here.

**Miscellaneous.** Out of 245 measurements of endogenous metabolic rates in heterotrophic prokaryotes, that were analyzed in this study, only 14 (5.7%) were accompanied by some information on cell size. In all other cases this information had to be found elsewhere.

Data on basal metabolic rates of mammals were taken from appendix 1 of the work of Savage *et al.* (2004). Minimal mass-specific values for each species were taken. Note that using,

for each species, mean species values given by Savage *et al.* (2004) in their appendix 1 instead of minimum values changes the geometric mean of the sample by 7%, from 4.4 W kg<sup>-1</sup> (Table 1) to 4.7 W kg<sup>-1</sup>.

All other information can be found in the corresponding files for taxonomic groups. As specified in *Methods*, we used the conversion factor of 20 J per 1 ml of O<sub>2</sub> consumed to convert oxygen consumption rates to energy consumption rates. While in plants, bacteria and fungi O<sub>2</sub> uptake may or may not be coupled to ATP synthesis (where the so-called cyanide-resistant respiration can indeed constitute a substantial portion of total respiration), this does not affect the energetic conversion factor, which only depends on the products of chemical reaction.

That is, if a carbohydrate molecule (CH<sub>2</sub>O)<sub>n</sub> is oxidized to produce water and carbon dioxide, (CH<sub>2</sub>O)<sub>n</sub> + nO<sub>2</sub> = nCO<sub>2</sub> + nH<sub>2</sub>O, the energy released will not depend on the chemical pathway, i.e., whether ATP synthesis was involved or not. For this reason, for example, the caloric equivalent of organic food (i.e., how much energy is released after its oxidation) can be measured (and originally was in the first food measurements made for military troops, fodder for cattle, etc.) by simply burning the food in the oven, where apparently no ATP synthesis occurs.

To summarize, the particular biochemical pathway provided the reaction products are the same does not influence the energetic equivalent of oxygen. The value of 20 J per 1 ml of O<sub>2</sub> that we use is representative of the main biochemical substrates oxidized by aerobic life, proteins (≈19 J per ml of O<sub>2</sub>), lipids (≈20 J per ml of O<sub>2</sub>) and carbohydrates (≈21 J per ml of O<sub>2</sub>), to the accuracy of 5%.

#### References for SI Methods and Tables S1–S3

- Andersen T, Hessen DO (1991) Carbon, nitrogen, and phosphorus content of freshwater zooplankton. *Limnol Oceanogr* 36:807–814.
- Balonov MI, Zheshko TV (1989) The water content in mammalian tissues and cells. *Fiziologicheskii zhurnal SSSR imeni I. M Sechenova* 75:963–969.
- Beers JR (1966) Studies on the chemical composition of the major zooplankton groups in the Sargasso Sea off Bermuda. *Limnol Oceanogr* 11:520–528.
- Brugger KE (1993) Digestibility of three fish species by double-crested cormorants. *Condor* 95:25–32.
- Childress JJ, Nygaard M (1974) Chemical composition and buoyancy of midwater crustaceans as function of depth of occurrence off Southern California. *Mar Biol* 27:225–238.
- Childress JJ, Nygaard MH (1973) The chemical composition of midwater fishes as a function of depth of occurrence off southern California. *Deep-Sea Res* 20:1093–1109.
- Chilgren JD (1985) Carbon, nitrogen, ash, and caloric density of lean dry body mass of white-crowned sparrows during postnuptial molt. *Auk* 102:414–417.
- Duarte CM (1992) Nutrient concentration of aquatic plants: Patterns across species. *Limnol Oceanogr* 37:882–889.
- Fagan WF, *et al.* (2002) Nitrogen in insects: Implications for trophic complexity and species diversification. *Am Nat* 160:784–802.
- Fenchel TB, Finlay J (1983) Respiration rates in heterotrophic, free-living protozoa. *Microbiol Ecol* 9:99–122.
- Fietz S, Nicklisch A (2002) Acclimation of the diatom *Stephanodiscus neoastraea* and the cyanobacterium *Planktothrix agardhii* to simulated natural light fluctuations. *Photosynth Res* 72:95–106.
- Fogg GE, Stewart WDP, Walsby AE (1973) *The Blue-Green Algae* (Academic, New York).
- Gordillo FJF, Jiménez C, Figueroa FL, Niell FX (1999) Effects of increased atmospheric CO<sub>2</sub> and N supply on photosynthesis, growth and cell composition of the cyanobacterium *Spirulina platensis* (Arthrospira). *J Appl Phycol* 10:461–469.
- Hadley NF (1994) *Water Relations of Terrestrial Arthropods* (Academic, San Diego).
- Hirst AG, Lucas CH (1998) Salinity influences body weight quantification in the scyphomedusa *Aurelia aurita*: Important implications for body weight determination in gelatinous zooplankton. *Mar Ecol Prog Ser* 165:259–269.
- Ikeda T, Skjoldal HR (1989) Metabolism and elemental composition of zooplankton from the Barents Sea during early Arctic summer. *Mar Biol* 100:173–183.
- Ikeda T, Kanno Y, Ozaki K, Shinada A (2001) Metabolic rates of epipelagic marine copepods as a function of body mass and temperature. *Mar Biol* 139:587–596.
- Ikeda T, Sano F, Yamaguchi A (2004) Metabolism and body composition of a copepod (*Neocalanus cristatus*: Crustacea) from the bathypelagic zone of the Oyashio region, western subarctic Pacific. *Mar Biol* 145:1181–1190.
- Ivleva IV (1980) The dependence of crustacean respiration rate on body mass and habitat temperature. *Int Rev Gesamten Hydrobiol* 65:1–47.
- Kawall HG, Torres JT, Geiger SP (2001) Effects of the ice-edge bloom and season on the metabolism of copepods in the Weddell Sea, Antarctica. *Hydrobiologia* 453/454:67–77.
- Kratz WA, Myers J (1955) Photosynthesis and respiration of three blue-green algae. *Plant Physiol* 30:275–280.
- Li Y, Gao K (2004) Photosynthetic physiology and growth as a function of colony size in the cyanobacterium *Nostoc sphaeroides*. *Eur J Phycol* 39:9–15.
- Myers J, Graham J-R (1971) The photosynthetic unit in *Chlorella* measured by repetitive short flashes. *Plant Physiol* 48:282–286.
- Posch T, *et al.* (2001) Precision of bacterioplankton biomass determination: A comparison of two fluorescent dyes, and of allometric and linear volume-to-carbon conversion factors. *Aquat Microb Ecol* 25:55–63.
- Reich PB, Tjoelker MG, Machado J-L, Oleksyn J (2006) Universal scaling of respiratory metabolism, size and nitrogen in plants. *Nature* 439:457–461.
- Savage VM, *et al.* (2004) The predominance of quarter-power scaling in biology. *Funct Ecol* 18:257–282.
- Scherer S, Ernst A, Chen T-W, Boger P (1984) Rewetting of drought-resistant blue-green algae: Time course of water uptake and reappearance of respiration, photosynthesis, and nitrogen fixation. *Oecologia* 62:418–423.
- Skadhauge E (1981) Osmoregulation in Birds, *Zoophysiology* (Springer, New York), Vol 12.
- Steffensen JF (2002) Metabolic cold adaptation of polar fish based on measurements of aerobic oxygen consumption: Fact or artefact? *Artefact! Comp Biochem Physiol* 132:789–795.
- Studier EH, Sevick SH, Wilson DE (1994) Proximate, caloric, nitrogen and mineral composition of bodies of some tropical bats. *Comp Biochem Physiol A Physiol* 109:601–610.
- Tepper BS (1968) Differences in the utilization of glycerol and glucose by *Mycobacterium phlei*. *J Bacteriol* 95:1713–1717.
- Tierney M, Hindell MA, Goldworthy S (2002) Energy content of mesopelagic fish from Macquaire Island. *Antarct Sci* 14:225–230.
- Torres JJ, Somero GN (1988) Metabolism, enzymic activities and cold adaptation in Antarctic mesopelagic fishes. *Mar Biol* 98:169–180.
- Truszkowski R (1927) Studies in purine metabolism. III. Basal metabolism and purine content. *Biochem J* 21:1040–1046.
- van Veen JA, Paul EA (1979) Conversion of biovolume measurements of soil organisms, grown under various moisture tensions, to biomass and their nutrient content. *Appl Environ Microbiol* 37:686–692.
- Vile D, *et al.* (2005) Specific leaf area and dry matter content estimate thickness in laminar leaves. *Ann Bot* 96:1129–1136.
- Vladimirova IG, Zotin AI (1983) Respiration rate in Protozoa. Manuscript No. 5500 (December 1983) deposited at All-Russian Institute of Scientific and Technological Information (VINITI).
- Vladimirova IG, Zotin AI (1985) Dependence of metabolic rate in Protozoa on body temperature and weight. *Zh Obshch Biol* 46:165–173.
- White CR, Phillips NR, Seymour RS (2006) The scaling and temperature dependence of vertebrate metabolism. *Biol Lett* 2:125–127.
- Wright IJ, *et al.* (2004) The worldwide leaf economics spectrum. *Nature* 428: 821–827.
- Yamamuro M, Aketa K, Uchida S (2004) Carbon and nitrogen stable isotope ratios of the tissues and gut contents of a dugong from the temperate coast of Japan. *Mamm Study* 29:179–183.

**Table S1. Comparison of minimal metabolic rates with taxonomic means from Table 1 in fish and copepods**

| Species                          | Body mass, g | Temp, °C | MMR, W kg <sup>-1</sup> | MMR adjusted to 25°C and<br>to the mean taxonomic<br>body mass from Table 1 | AMR, W kg <sup>-1</sup> | MMR/AMR |
|----------------------------------|--------------|----------|-------------------------|-----------------------------------------------------------------------------|-------------------------|---------|
| Fish                             |              |          |                         |                                                                             |                         |         |
| <i>Onchorhynchus mykiss</i>      | 392          | 10       | 0.19                    | 0.40                                                                        | 0.38                    | 1.1     |
| <i>Trematomus hansonii</i>       | 100          | -1       | 0.11                    | 0.32                                                                        | 0.38                    | 0.8     |
| <i>Pagothenia borchgrevinkii</i> | 100          | -1       | 0.11                    | 0.32                                                                        | 0.38                    | 0.8     |
| <b>Mean for fish</b>             |              |          |                         |                                                                             |                         | 0.9     |
| Copepods                         |              |          |                         |                                                                             |                         |         |
| <i>Calanoides acutus</i>         | 0.0033       | 0        |                         |                                                                             | 3.0                     | 0.4     |
| <i>Calanus propinquus</i>        | 0.0047       | 0        |                         |                                                                             | 3.0                     | 0.7     |
| <i>Metridia gerlachei</i>        | 0.0014       | 0        |                         |                                                                             | 3.0                     | 0.7     |
| <i>Gaetanus tenuispinus</i>      | 0.0036       | 0        |                         |                                                                             | 3.0                     | 0.1     |
| <i>Rhincalanus gigas</i>         | 0.0117       | 0        |                         | 1.                                                                          | 3.0                     | 0.3     |
| <i>Paraeuchaeta antarctica</i>   | 0.0196       | 0        |                         |                                                                             | 3.0                     | 0.5     |
| <i>Heterohabdus farrani</i>      | 0.0032       | 0        |                         |                                                                             | 3.0                     | 0.8     |
| <b>Mean for copepods</b>         |              |          |                         |                                                                             |                         | 0.5     |

MMR, minimal metabolic rate; AMR, average taxonomic metabolic rate from Table 1. Data for fish are from Steffensen (2002), and for copepods are from Kawall et al. (2001). Note: for temperature and body mass adjustments of MMR  $Q_{10}$  values of 1.65 and 2.0 (*Methods*) and scaling exponents  $\beta = -0.15$  and  $-0.30$  (Table 1) were used for fish and copepods, respectively.

Table S2. Nitrogen content in the taxonomic groups studied

| Taxonomic group                | N/DM, %                               | Reference                                                           | Comment                           |
|--------------------------------|---------------------------------------|---------------------------------------------------------------------|-----------------------------------|
| Heterotrophs                   |                                       |                                                                     |                                   |
| Prokaryotes                    | 6.5–8.9                               | <i>Arthrobacter globiformis</i>                                     | van Veen and Paul 1979            |
|                                | 9.1–11.1                              | <i>Enterobacter aerogenes</i>                                       | van Veen and Paul 1979            |
|                                | 10.0–14.1                             | <i>Bacillus cereus</i>                                              | Dataset S1                        |
|                                | 5.6–8.9                               | <i>Mycobacterium phlei</i>                                          | Tepper 1968                       |
|                                | 10                                    | <i>Streptococcus agalactiae</i>                                     |                                   |
|                                | 9.5                                   | MEAN                                                                |                                   |
| Protozoa                       | 10.6                                  | Used as a mean value for analysis of an extensive metabolic dataset | Vladimirova and Zotin 1983        |
|                                | 12                                    | Used as a mean value for analysis of an extensive metabolic dataset | Fenchel and Finlay 1983           |
| Insects                        | 9.7 ± 0.2                             | 119 herbivores insect species, mean ± 1 SE                          | Fagan <i>et al.</i> 2002          |
|                                | 11 ± 0.2                              | 33 predator species, mean ± 1 SE                                    | Fagan <i>et al.</i> 2002          |
| Aquatic invertebrates          | 9–11                                  | Crustacean zooplankton in freshwater lake                           | Andersen and Hessen 1991          |
| Crustacea: copepods and krill  | 9–11                                  | Sargasso Sea                                                        | Beers 1966                        |
|                                | 9.8 ± 0.06                            | n = 10 species (mean ± 1 SD)                                        | Dataset S4                        |
| Crustacea: peracarids          | 6.4 ± 1.9                             | n = 13 species (mean ± 1 SD)                                        | Dataset S4                        |
| Crustacea: decapods            | 8.3 ± 1.8                             | n = 12 species (mean ± 1 SD)                                        | Dataset S4                        |
| Mollusca: cephalopods          | n.d.                                  |                                                                     |                                   |
| Gelatinous invertebrates       | 10                                    | chaetognath <i>Sagitta elegans</i>                                  | Ikeda and Skjoldal 1989           |
|                                | 4.3                                   | medusa <i>Aglantha digitale</i>                                     | Ikeda and Skjoldal 1989           |
| Ectothermic vertebrates        |                                       |                                                                     |                                   |
| Amphibians                     | n.d.                                  |                                                                     |                                   |
| Fish                           | 11.5                                  | <i>Ictalurus punctatus</i>                                          | Brugger 1993                      |
|                                | 14.2                                  | <i>Dorosoma cepedianum</i>                                          | Brugger 1993                      |
|                                | 13.7                                  | <i>Lepomis cepedianum</i>                                           | Brugger 1993                      |
| Reptiles                       | n.d.                                  |                                                                     |                                   |
| Endothermic vertebrates        |                                       |                                                                     |                                   |
| Birds                          | 12–14                                 | <i>Zonotrichia leucophrys</i> , lean dry mass                       | Chilgren 1985                     |
| Mammals                        | 11.2–13.2                             | Various tissues of <i>Dugong dugong</i>                             | Yamamuro <i>et al.</i> 2002       |
|                                | 9.7                                   | Rat, whole body                                                     | Truskowski 1927                   |
|                                | 12                                    | Guinea-pig, whole body                                              | Truskowski 1927                   |
|                                | 14.5                                  | Horse, skeletal muscle                                              | Truskowski 1927                   |
|                                | 15.2                                  | Mean for 24 tropical bats, whole body                               | Studier <i>et al.</i> 1994        |
| Photoautotrophs                |                                       |                                                                     |                                   |
| Cyanobacteria                  | 4–9                                   |                                                                     | Fogg <i>et al.</i> 1973           |
|                                | 4.2–13.1                              | <i>Spirulina platensis</i>                                          | Gordillo <i>et al.</i> 1999       |
|                                | 9.4                                   | <i>Anacystis nidulans</i>                                           | Kratz and Myers 1955              |
| Eukaryotic microalgae          | 6.9–8.6                               | <i>Chatocerus furcellatus</i> *                                     | Dataset S8                        |
|                                | 5.1–6.3                               | <i>Coscinodiscus</i> sp. C38B*                                      | Dataset S8                        |
|                                | 6.0–7.5                               | <i>Coscinodiscus</i> sp. CoA*                                       | Dataset S8                        |
|                                | 6.8–8.5                               | <i>Ditylum brightwellii</i> *                                       | Dataset S8                        |
|                                | 9.1–11.4                              | <i>Dunaliella tertiolecta</i> *                                     | Dataset S8                        |
|                                | 8.3–10.4                              | <i>Emiliana huxleyi</i> *                                           | Dataset S8                        |
|                                | 4.8–6.0                               | <i>Gonyaulax tamarensis</i> *                                       | Dataset S8                        |
|                                | 7.3–9.1                               | <i>Isochrysis galbana</i> *                                         | Dataset S8                        |
|                                | 6.9–8.6                               | <i>Leptocylindrus danicus</i> *                                     | Dataset S8                        |
|                                | 3.1–3.9                               | <i>Monochrysis lutheri</i> *                                        | Dataset S8                        |
|                                | 5.6–6.9                               | <i>Olisthodiscus luteus</i> *                                       | Dataset S8                        |
|                                | 8.2–10.2                              | <i>Phaeodactylum tricorutum</i> *                                   | Dataset S8                        |
|                                | 10.8–13.5                             | <i>Prorocentrum micans</i> *                                        | Dataset S8                        |
|                                | 5.9–7.4                               | <i>Skeletonema costatum</i> *                                       | Dataset S8                        |
|                                | 8.7–10.9                              | <i>Stephanodiscus neoastraea</i> *                                  | Dataset S8                        |
| 7.5–9.4                        | <i>Thalassiosira nordenskioldii</i> * | Dataset S8                                                          |                                   |
| 5.1–6.3                        | <i>Thalassiosira pseudonana</i> *     | Dataset S8                                                          |                                   |
| 6.3–7.9                        | <i>Thalassiosira weissflogii</i> *    | Dataset S8                                                          |                                   |
|                                | 6.3–7.9                               | MEAN                                                                |                                   |
| Phytoplankton                  | 5.5 ± 2.5                             | Mean ± 1 SD for 112 measurements                                    | Duarte 1992                       |
| Eukaryotic macroalgae          | 1.9 ± 0.8                             | Mean ± 1 SD for 298 measurements                                    | Duarte 1992                       |
| Vascular plants: green leaves  | 1.7                                   | Geometric mean for 2,061 measurements; 95% C.I. 0.6–5               | Data of Wright <i>et al.</i> 2004 |
| Vascular plants: tree saplings | 0.54                                  | Geometric mean for 118 measurements; 95% C.I. 0.3–1                 | Data of Reich <i>et al.</i> 2006  |
| Vascular plants: seedlings     | 2.8                                   | Geometric mean for 198 measurements; 95% C.I. 1.6–5.0               | Data of Reich <i>et al.</i> 2006  |

N/DM, nitrogen mass to dry mass ratio.

\*N/DM calculated from the known C/N mass ratio assuming either 40% or 50% carbon in dry mass (lower and upper value of the range, respectively). The two species with known carbon/dry mass ratios were *Navicula pelliculosa* (C/DM = 0.412) and *Stephanodiscus neoastraea* (C/ODM = 0.46; ODM, organic dry matter). For each species, the N/DM ratio shown corresponds to the measurement with the lowest metabolic rate.

**Table S3. Dry matter content in the taxonomic groups studied**

| Taxonomic group                | U | DM/WM        | Reference                  | Comment                                                               |
|--------------------------------|---|--------------|----------------------------|-----------------------------------------------------------------------|
| Heterotrophs                   |   |              |                            |                                                                       |
| Prokaryotes                    | D | 0.16–0.40    | Posch <i>et al.</i> 2001   | Depends on cell size and measurement technique                        |
| Protozoa                       | D | 0.15         | Fenchel and Finlay 1983    |                                                                       |
|                                |   | 0.135        | Vladimirova and Zotin 1983 |                                                                       |
| Insects                        | W | 0.2–0.6      | Hadley 1994                |                                                                       |
| Aquatic invertebrates          | W |              |                            |                                                                       |
| Crustacea: copepods and krill  | W | 0.19 ± 0.05  | Dataset S4                 | <i>n</i> = 55 species (mean ± 1 SD)                                   |
| Crustacea: peracarids          | W | 0.22 ± 0.15  | Dataset S4                 | <i>n</i> = 38 species (mean ± 1 SD)                                   |
| Crustacea: decapods            | W | 0.23 ± 0.08  | Dataset S4                 | <i>n</i> = 18 species (mean ± 1 SD)                                   |
|                                |   | 0.29         | Ileva 1980                 | 208 observations for eight species of tropical and temperate decapods |
| Mollusca: cephalopods          | W | n.d.         |                            |                                                                       |
| Gelatinous invertebrates       | W | 0.035–0.05   | Hirst and Lucas 1998       | medusae                                                               |
|                                |   | 0.035–0.30   | Hirst and Lucas 1998       | chaetognaths                                                          |
|                                |   | 0.1          | Ikeda and Skjoldal 1989    | chaetognaths                                                          |
| Ectothermic vertebrates        | W |              |                            |                                                                       |
| Amphibians                     | W | n.d.         |                            |                                                                       |
| Fish                           | W | 0.26         | Tierney <i>et al.</i> 2002 | Mesopelagic Antarctic fishes                                          |
|                                |   | (0.18–0.30)  |                            |                                                                       |
|                                |   | 0.29         | Torres and Somero 1988     | Mesopelagic Antarctic fishes                                          |
|                                |   | (0.13–0.36)  |                            |                                                                       |
|                                |   | 0.24–0.29    | Brugger 1993               | 3 North American fishes                                               |
| Reptiles                       | W | n.d.         |                            |                                                                       |
| Endothermic vertebrates        | W |              |                            |                                                                       |
| Birds                          | W | 0.30–0.38    | Skadhauge 1981             |                                                                       |
| Mammals                        | W | 0.38         | Balonov and Zhesko 1989    | Rats, mice, dogs, humans                                              |
| Photoautotrophs                |   |              |                            |                                                                       |
| Cyanobacteria                  | D | 0.42*        | Fietz and Nicklisch 2002   | <i>Planktothrix agardhii</i>                                          |
|                                |   | 0.067, 0.172 | Scherer <i>et al.</i> 1984 | Two fully hydrated Nostoc spp.                                        |
|                                |   | 0.035        | Li and Gao 2004            | <i>Nostoc sphaeroides</i>                                             |
| Eukaryotic microalgae          | C | 0.18–0.26*   | Myers and Graham 1971      | <i>Chlorella pyrenoidosa</i>                                          |
|                                |   | 0.27*        | Fietz and Nicklisch 2002   | <i>Stephanodiscus neoastraea</i>                                      |
| Eukaryotic macroalgae          | D | 0.23         | Weykam <i>et al.</i> 1996  | 35 Antarctic species                                                  |
|                                |   | (0.12–0.54)  |                            |                                                                       |
| Vascular plants: green leaves  | D | 0.16–0.41    | Vile <i>et al.</i> 2005    | DM/WM increases from short-lived forbs to trees                       |
| Vascular plants: tree saplings | D | n.d.         |                            |                                                                       |
| Vascular plants: seedlings     | D | n.d.         |                            |                                                                       |

DM/WM, dry mass to wet mass ratio; U, dominant mass units in the original data sources: metabolic rates reported mostly per dry (D), wet (W), or carbon (C) mass basis.

\*Calculated from DM/volume ratio assuming cell density of 1 g ml<sup>-1</sup>.



## Other Supporting Information Files

[Dataset S1](#)

[Dataset S2](#)

[Dataset S3](#)

[Dataset S4](#)

[Dataset S5](#)

[Dataset S6](#)

[Dataset S7](#)

[Dataset S8](#)

[Dataset S9](#)

[Dataset S10](#)

[Dataset S11](#)

[SI Appendix](#)
