# Supplementary material
Source: PubMed Central journal article supplement (PMC2579366)
Supplement: 0802148105_DS1_PDF.pdf [file 0802148105_DS1_PDF.pdf]

## Dataset S1. Endogenous respiration rates in heterotrophic prokaryotes

Notes to Table **S1a**:

### On data collection:

Prokaryote data were compiled by searching the [www.pubmedcentral.nih.gov](http://www.pubmedcentral.nih.gov) full-text library for "bacterium" and "endogenous respiration" and subsequent analysis of the returned 570 documents (mostly papers in the Journal of Bacteriology and Journal of Applied and Environmental Microbiology, time period 1940-2006) and references therein.

### On cell size and taxonomy:

Data on endogenous respiration rates (i.e. respiration rates of non-growing cells in nutrient-deprived media) in heterotrophic eukaryotes are presented. Studies of bacterial respiration **very rarely** report information on cell size, which had therefore to be retrieved from different sources. To do so, an attempt was made to assign the bacterial strains described in the metabolic sources to accepted species names, to further estimate the cell size for these species in the relevant literature. This was done using strain designations and information in the official bacterial culture collections, like ATCC (American Type Culture Collection), NCTC (National Type Culture Collection) and others.

Column "**Species (Strain)**" gives the strain designation **as given by the authors** of the respiration data paper. Column "**Valid Name**" gives the relevant valid species name for this strain, as determined from culture collections' information and/or other literature sources. Valid names follow Euzéby (1997). Cell size in the "**Mpg**" column correspond to species indicated in the "Valid Name" column. Note that this information is of approximate nature, because many respiration data come from quite old publications and it was sometimes difficult to find out the valid name of the strain used with great precision. "**Class:Order**" column contains the relevant taxonomic information for the species listed in the "Valid Name" column as given by Euzéby (1997) (<http://www.bacterio.net>).

For example, Hareland et al. (1975) reported respiration rate for *Pseudomonas acidovorans* (ATCC strain number 17455). ATCC web site ([www.atcc.org](http://www.atcc.org)) says that this strain is *Delftia acidovorans* originally deposited as *Pseudomonas acidovorans*. Cell size for *Pseudomonas acidovorans* was therefore determined from the species description of *Delftia acidovorans* given by Wen et al. (1999). "**Class:Order**" for these data was determined as given at <http://www.bacterio.net> for *Delftia acidovorans*.

Note that the taxonomic uncertainty exclusively relates to the cell size determination. Cell size information participates in the paper's results only as a crude mean for all the 173 species studied, which is unlikely biased in any significant way. Taxonomic uncertainties, if any, do not influence any of the conclusions regarding the range, mean and frequency distribution of the prokaryotic respiration rates analysed in the paper.

**Abbreviations and universal conversions:** DM – dry mass; WM – wet mass; N – nitrogen mass; C – carbon mass; Pr – protein mass; X/Y – X by Y mass ratio in the cell, e.g. DM/WM is the ratio of dry to wet cell mass;  $1 \text{ W} = 1 \text{ J s}^{-1}$ ;  $1 \text{ mol O}_2 = 32 \text{ g O}_2$ .

**Original units** are the units of endogenous respiration rate measurements as given in the original publication (**Source**); **qou** is the numeric value of endogenous respiration rate in the original units. E.g., if it is “ $\mu\text{l O}_2 (5 \text{ mg DM})^{-1} (2 \text{ hr})^{-1}$ ” in the column “**Original units**” and “200” in the column “**qou**”, this means that cells amounting to 5 mg dry mass consumed 200 microliters oxygen in two hours.

**qWkg** is the original endogenous respiration rate **qou** converted to W (kg WM)<sup>-1</sup> (Watts per kg wet mass) using the following conversion factors: C/DM = 0.5 (Kratz & Myers 1955; Bratbak & Dundas 1984; Nagata 1986), Pr/DM = 0.5 (Gronlund & Campbell 1961; Sobek et al. 1966; Smith & Hoare 1968 (see Table S1a); Zubkov et al. 1999), N/DM = 0.1 (SI Methods, Table S12b) if not indicated otherwise, and DM/WM = 0.3 as a crude mean for all taxa applied in the analysis (SI Methods, Table S12a). Energy conversion: 1 ml O<sub>2</sub> = 20 J. The respiratory quotient of unity was used (1 mol CO<sub>2</sub> released per 1 mol O<sub>2</sub> consumed).

**TC** is ambient temperature during measurements, degrees Celsius.

**q25Wkg** is endogenous respiration rate converted to 25 °C using Q<sub>10</sub> = 2,  $\mathbf{q25Wkg} = \mathbf{qWkg} \times 2^{(25 - \text{TC})/10}$ , dimension W (kg WM)<sup>-1</sup>. For each species rows are arranged in the order of increasing **q25Wkg**.

**Mpg**: estimated cell mass, pg (1 pg = 10<sup>-12</sup> g). In most cases it is estimated from linear dimensions (using geometric mean of the available linear size range) assuming spherical cell shape for cocci and cylindrical shape for rods. Square brackets around the **Mpg** value indicate that the cell size information was obtained from a different source than the source of endogenous respiration rate data. When converting cell volume to cell mass, cell density of 1 g ml<sup>-1</sup> was assumed.

**Source**: the first, unbracketed reference in this column is where the value of **qou** is taken from; references and data in square brackets refer to cell size determination. Cell size reference "BM" in brackets corresponds to Bergey's Manual of Systematic Bacteriology, 1<sup>st</sup> Edition (Holt, 1984, 1986, 1989); BM9 is Bergey's Manual of Determinative Bacteriology, 9<sup>th</sup> Edition (Holt et al. 1994). Word "genus" in brackets indicates that cell size is determined as mean for the genus. This was done for those genera where the range of minimum to maximum cell masses did not exceed a factor of ten. E.g. for an unknown Chromatium sp. (BM9 genus: rods 1-6×1.5-15 μm, which corresponds to cell mass range from 1.2 to 420 pg) cell mass was left undetermined (empty "**Mpg**" column).

**Culture age**: Information on culture age and the duration of respiration measurements, if available.

**Comments**: this column provides relevant information on culture conditions and cellular composition of the studied species, often including additional data on respiration rates that were obtained for the same strain (species) by the same group of authors.

Log<sub>10</sub>-transformed values of **q25Wkg** (W (kg WM)<sup>-1</sup>), minimum for each species, were used in the analyses shown in Figures 1-3 and Table 1 in the paper (a total of 173 values for n = 173 species). The corresponding rows are highlighted in [blue](#).

References within Table S1a to Tables, Figures etc. refer to the corresponding items in the original literature indicated in the **Source** column.

**Table S1a.** Endogenous respiration rates in heterotrophic prokaryotes.

| Species (strain)                    | Valid name                | Class: Order                        | Original units                                                             | MIN | gou  | qWkg | TC | q25Wkg | Mpg    | Source                                                                                      | Culture age                                                                                                 | Comments                                                                                                                                                                                                                                                                                                |
|-------------------------------------|---------------------------|-------------------------------------|----------------------------------------------------------------------------|-----|------|------|----|--------|--------|---------------------------------------------------------------------------------------------|-------------------------------------------------------------------------------------------------------------|---------------------------------------------------------------------------------------------------------------------------------------------------------------------------------------------------------------------------------------------------------------------------------------------------------|
| Acetobacter (Ch 31)                 | 1.Acetobacter aceti       | Clostridia: Clostridiales           | $\mu\text{mol O}_2 (1.8 \times 45 \text{ mg WM})^{-1} (5 \text{ hr})^{-1}$ | MIN | 2    | 0.6  | 30 | 0.42   | [0.75] | De Ley & Schell 1959 [BM, ellipsoid or rod-shaped 0.6-0.8x1.0-4.0 $\mu\text{m}$ ]           | Cells incubated for 4-5 days on gelatin slants at 20 C; respiration measured for 5 hr                       | Cells additionally incubated for 2-3 days at 30 C in a shaking apparatus "occasionally displayed higher endogenous respiration, $13.5 \mu\text{mol O}_2 (1.8 \times 45 \text{ mg WM})^{-1} (2.5 \text{ hr})^{-1} = 8.3 \text{ W/kg}$ ; this respiration increased exponentially during incubation       |
| Acholeplasma laidlawii (NCTC 10116) | 2.Acholeplasma laidlawii  | Mollicutes: Acholeplasmatales       | $\text{nmol O}_2 (\text{mg protein})^{-1} \text{min}^{-1}$                 | MIN | 1.2  | 1.4  | 37 | 0.61   | [0.04] | Abu-Amero et al. 1996 [Wieslander et al. 1987, sphere diam 0.3-0.6 $\mu\text{m}$ ]          | Cells harvested after 24-72 hr incubation                                                                   |                                                                                                                                                                                                                                                                                                         |
| Hydrogenomonas ruhlandii            | 3.Achromobacter ruhlandii | Betaproteobacteria: Burkholderiales | $\mu\text{l O}_2 (0.5 \text{ mg DM})^{-1} (2 \text{ hr})^{-1}$             | MIN | 9    | 15   | 30 | 10.61  | 0.2    | Packer & Vishniac 1955 [rods 0.4-0.75x0.75-2.0 $\mu\text{m}$ , mean 0.5x1.1 $\mu\text{m}$ ] | Bacteria harvested after 4-5 days' incubation on agar plates; respiration of resting cells measured for 2 h | Hydrogen-oxidizing bacterium isolated from soil                                                                                                                                                                                                                                                         |
| Achromobacter sp.                   | 4.Achromobacter sp.       | Betaproteobacteria: Burkholderiales | $\mu\text{mol O}_2 (100 \text{ mg DM})^{-1} (2 \text{ hr})^{-1}$           | MIN | 45.1 | 8.4  | 30 | 5.94   | [0.6]  | Gronlund & Campbell 1961 [Chester & Cooper 1979, 0.5-0.8x1.5-2.5 $\mu\text{m}$ ]            | cells harvested after 20 hr growth; respiration measured for 2 hr                                           | Classification and size determination made for the Achromobacter genus as described at <a href="http://www.bacterio.cict.fr">www.bacterio.cict.fr</a> . There is no such species at <a href="http://www.bacterio.cict.fr">www.bacterio.cict.fr</a>                                                      |
| Achromobacter (B8)                  | 5.Achromobacter sp.       | Betaproteobacteria: Burkholderiales | $\mu\text{l O}_2 (5 \text{ mg DM})^{-1} (2 \text{ hr})^{-1}$               |     | 200  | 35   | 30 | 24.75  | [0.6]  | Tomlinson & Campbell 1963 [Chester & Cooper 1979, 0.5-0.8x1.5-2.5 $\mu\text{m}$ ]           | cells harvested after 20 hr growth; respiration measured for 2 hr                                           | No drop of respiration during the first two hours<br>Classification and size determination made for the Achromobacter genus as described at <a href="http://www.bacterio.cict.fr">www.bacterio.cict.fr</a> . There is no such species at <a href="http://www.bacterio.cict.fr">www.bacterio.cict.fr</a> |
| Achromobacter viscosus (ATCC 12448) | 6.Achromobacter viscosus  | Betaproteobacteria: Burkholderiales | $\mu\text{l O}_2 (5 \text{ mg DM})^{-1} (2 \text{ hr})^{-1}$               | MIN | 200  | 35   | 30 | 24.75  | [0.6]  | Tomlinson & Campbell 1963 [Chester & Cooper 1979, 0.5-0.8x1.5-2.5 $\mu\text{m}$ ]           | cells harvested after 20 hr growth; respiration measured for 2 hr                                           | No drop of respiration during the first two hours<br>Classification and size determination made for the Achromobacter genus as described at <a href="http://www.bacterio.cict.fr">www.bacterio.cict.fr</a> . There is no such species at <a href="http://www.bacterio.cict.fr">www.bacterio.cict.fr</a> |
| Achromobacter xerosis (ATCC 14780)  | 7.Achromobacter xerosis   | Betaproteobacteria: Burkholderiales | $\mu\text{l O}_2 (\text{mg DM})^{-1} \text{hr}^{-1}$                       | MIN | 14   | 23   | 30 | 16.26  | [0.5]  | Jurtshuk & McQuitty 1976 [Groupé et al. 1954, 0.5x2-3 $\mu\text{m}$ ]                       | Cells harvested at the late-logarithmic growth phase (two thirds of the maximal growth concentration)       | Classification and size determination made for the Achromobacter genus as described at <a href="http://www.bacterio.cict.fr">www.bacterio.cict.fr</a> . There is no such species at <a href="http://www.bacterio.cict.fr">www.bacterio.cict.fr</a>                                                      |
| Hydrogenomonas facilis              | 8.Acidovorax facilis      | Betaproteobacteria: Burkholderiales | $\mu\text{l O}_2 (\text{mg DM})^{-1} \text{hr}^{-1}$                       | MIN | 4-11 | 7    | 30 | 4.95   | 0.3    | Schatz & Bovell 1952 [rods, 0.4x2.5 $\mu\text{m}$ in                                        | Heterotrophic cultures: cells grown for 48, 21, 72, and 48 hr on lac-                                       | Synonym Pseudomonas facilis                                                                                                                                                                                                                                                                             |

| Strain                                   | Reference                      | Phylum               | Class           | Order | Family | Genus | Species | Substrate                                                        | Temperature (°C) | pH   | W/k | Notes |       |       |                                                             |                                                                                                       |                                                                                                                                                                                                                  |
|------------------------------------------|--------------------------------|----------------------|-----------------|-------|--------|-------|---------|------------------------------------------------------------------|------------------|------|-----|-------|-------|-------|-------------------------------------------------------------|-------------------------------------------------------------------------------------------------------|------------------------------------------------------------------------------------------------------------------------------------------------------------------------------------------------------------------|
| Acinetobacter calcoaceticus (ATCC 19606) | 9.Acinetobacter baumannii      | Gammaproteobacteria: | Pseudomonadales |       |        |       |         | μl O <sub>2</sub> (mg DM) <sup>-1</sup> hr <sup>-1</sup>         | MIN              | 4    | 12  | 30    | 8.49  | [2]   | Jurtshuk & McQuitty 1976 [BM, genus, rods 0.9-1.6× 1.5-2.5] | heterotrophic cultures, 0.3×2.0 in autotrophic cultures]                                              | tate, succinate, glucose and tryptose, respectively.                                                                                                                                                             |
| Acinetobacter calcoaceticus (208)        | 10.Acinetobacter calcoaceticus | Gammaproteobacteria: | Pseudomonadales |       |        |       |         | μl O <sub>2</sub> (mg DM) <sup>-1</sup> hr <sup>-1</sup>         | MIN              | 7    | 6.7 | 30    | 4.74  | [2]   | Jurtshuk & McQuitty 1976 [BM, genus, rods 0.9-1.6× 1.5-2.5] | Cells harvested at the late-logarithmic growth phase (two thirds of the maximal growth concentration) | Cells harvested at the late-logarithmic growth phase (two thirds of the maximal growth concentration)                                                                                                            |
| Acinetobacter johnsonii (210A)           | 11.Acinetobacter johnsonii     | Gammaproteobacteria: | Pseudomonadales |       |        |       |         | nmol O <sub>2</sub> (mg protein) <sup>-1</sup> min <sup>-1</sup> | MIN              | 41   | 46  | 30    | 32.53 | [2]   | van Veen et al. 1993 [BM, genus, rods 0.9-1.6× 1.5-2.5]     | Cells harvested at the logarithmic phase                                                              | When starved for 12 hours, respiration decreases to "very low rates" but when glucose is added, returns back to the higher level indicating no loss of viability. This suggests that 41 W/kg is an overestimate. |
| Acinetobacter calcoaceticus (ATCC 31012) | 12.Acinetobacter sp.           | Gammaproteobacteria: | Pseudomonadales |       |        |       |         | μl O <sub>2</sub> (mg DM) <sup>-1</sup> hr <sup>-1</sup>         | MIN              | 2.0  | 3.3 | 25    | 3.30  | [2]   | Bruheim et al. 1999 [BM, genus, rods 0.9-1.6× 1.5-2.5]      | Cells grown to the early stationary phase on oil                                                      |                                                                                                                                                                                                                  |
| Acinetobacter sp.                        | 13.Acinetobacter sp.           | Gammaproteobacteria: | Pseudomonadales |       |        |       |         | μl O <sub>2</sub> (4 mg DM) <sup>-1</sup> min <sup>-1</sup>      | MIN              | 0.25 | 6   | 30    | 4.24  | [2]   | Sparnins et al. 1974 [BM, genus, rods 0.9-1.6× 1.5-2.5]     | Bacteria grown overnight to the stationary phase (Dagley & Gibson 1975)                               | Gram-negative, oxidase-negative coccobacillus that cannot utilize glucose was isolated from agricultural soil in St. Paul, Minnesota, USA and tentatively identified as Acinetobacter sp.                        |
| Acinetobacter sp. (4-CB1)                | 14.Acinetobacter sp.           | Gammaproteobacteria: | Pseudomonadales |       |        |       |         | nmol O <sub>2</sub> (mg protein) <sup>-1</sup> min <sup>-1</sup> | MIN              | 7    | 8   | 30    | 5.66  | [2]   | Adriaens et al. 1989 [BM, genus, rods 0.9-1.6× 1.5-2.5]     | Cells grown to the late exponential phase                                                             | Bacterium isolated from soil contaminated with polychlorobiphenyl                                                                                                                                                |
| Aeromonas hydrophila (ATCC 4715)         | 15.Aeromonas hydrophila        | Gammaproteobacteria: | Aeromonadales   |       |        |       |         | μl O <sub>2</sub> (mg DM) <sup>-1</sup> hr <sup>-1</sup>         | MIN              | 23   | 38  | 30    | 26.87 |       | Jurtshuk & McQuitty 1976                                    | Cells harvested at the late-logarithmic growth phase (two thirds of the maximal growth concentration) |                                                                                                                                                                                                                  |
| Aeromonas hydrophila (ATCC 9071)         | 16.Aeromonas veronii           | Gammaproteobacteria: | Aeromonadales   |       |        |       |         | μl O <sub>2</sub> (mg DM) <sup>-1</sup> hr <sup>-1</sup>         | MIN              | 12   | 20  | 30    | 14.14 |       | Jurtshuk & McQuitty 1976                                    | Cells harvested at the late-logarithmic growth phase (two thirds of the maximal growth concentration) |                                                                                                                                                                                                                  |
| Agrobacterium                            | 17.Agrobacterium               | Alphaproteobacteria: |                 |       |        |       |         | μl O <sub>2</sub> (mg DM) <sup>-1</sup> hr <sup>-1</sup>         | MIN              | 12   | 20  | 30    | 14.14 | [1.5] | Jurtshuk &                                                  | Cells harvested at the                                                                                |                                                                                                                                                                                                                  |

| Strain                               | Strain                     | Order                               | Respiration rate                                                  | MIN | MAX  | Q <sub>10</sub> | Q <sub>20</sub> | Q <sub>30</sub> | Q <sub>40</sub> | Q <sub>50</sub> | References                                                           | Notes                                                                                                                                                                                                                                                                                     |
|--------------------------------------|----------------------------|-------------------------------------|-------------------------------------------------------------------|-----|------|-----------------|-----------------|-----------------|-----------------|-----------------|----------------------------------------------------------------------|-------------------------------------------------------------------------------------------------------------------------------------------------------------------------------------------------------------------------------------------------------------------------------------------|
| tumefaciens (ATCC 15955)             | tumefaciens                | Rhizobiales                         | DM) <sup>-1</sup> hr <sup>-1</sup>                                |     |      |                 |                 |                 |                 |                 | McQuitty 1976 [BM9, genus, rods 0.6-1.0×1.5-3.0 μm]                  | late-logarithmic growth phase (two thirds of the maximal growth concentration)                                                                                                                                                                                                            |
| Hydrogenomonas eutropha (ATCC 17697) | 18.Alcaligenes eutrophus   | Betaproteobacteria: Burkholderiales | μmol O <sub>2</sub> (3.6 mg DM) <sup>-1</sup> hr <sup>-1</sup>    | MIN | 8    | 83              | 33              | 47.67           |                 | [0.8]           | Bongers 1970 [BM, rods, 0.7×1.8-2.6 μm]                              | Respiration of cells withdrawn from turbidostat (steady-state growth)                                                                                                                                                                                                                     |
| Alcaligenes faecalis (ATCC 8750)     | 19.Alcaligenes faecalis    | Betaproteobacteria: Burkholderiales | μl O <sub>2</sub> (mg DM) <sup>-1</sup> hr <sup>-1</sup>          | MIN | 16   | 27              | 30              | 19.09           |                 |                 | Jurtshuk & McQuitty 1976                                             | Cells harvested at the late-logarithmic growth phase (two thirds of the maximal growth concentration)                                                                                                                                                                                     |
| Alcaligenes (strain 5)               | 20.Alcaligenes sp.         | Betaproteobacteria: Burkholderiales | μmol O <sub>2</sub> (14 mg DM) <sup>-1</sup> (5 hr) <sup>-1</sup> | MIN | 4    | 2.1             | 30              | 1.48            |                 |                 | Subba-Rao & Alexander 1985                                           | Bacteria grown for 2 days; washed; incubated in buffer for 6 to 12 hr on a rotary shaker at 30 C to reduce endogenous respiration; washed again and added to respirometer flasks (Subba-Rao & Alexander 1977)                                                                             |
| Unnamed methylo-troph (CC495)        | 21.Aminobacter lissarensis | Alphaproteobacteria: Rhizobiales    | nmol O <sub>2</sub> (mg WM) <sup>-1</sup> min <sup>-1</sup>       | MIN | 0.22 | 1.6             | 25              | 1.60            |                 | [0.6]           | Coulter et al. 1999 [BM9, genus, rods, 0.6-1.0×1.0-3.0 μm]           | Cells harvested in the late exponential phase                                                                                                                                                                                                                                             |
| Amoebobacter purpureus (ML1)         | 22.Amoebobacter purpureus  | Gammaproteobacteria: Chromatiales   | nmol O <sub>2</sub> (mg protein) <sup>-1</sup> min <sup>-1</sup>  | MIN | 9.8  | 11              | 30              | 7.78            |                 | [36]            | Overmann & Pfennig 1992 [Eichler & Pfennig 1988, 3.3-3.8×3.5-4.5 μm] | Respiration of cells without microscopically visible sulfure globules at oxygen concentrations of 11-67 μM; respiration rates of phototrophically (anaerobically) and chemotrophically (microaerobically) grown cells do not differ; the species displays poor if any growth in the dark. |
| Amoebobacter roseus (6611)           | 23.Amoebobacter roseus     | Gammaproteobacteria: Chromatiales   | nmol O <sub>2</sub> (mg protein) <sup>-1</sup> min <sup>-1</sup>  | MIN | 4.8  | 5.4             | 30              | 3.82            |                 | [5]             | Overmann & Pfennig 1992 [BM9, genus, spherical cells 1.5-3 μm diam]  | Respiration of cells without microscopically visible sulfure globules at oxygen concentrations of 11-67 μM; respiration rates of phototrophically (anaerobically) and chemotrophically                                                                                                    |
|                                      |                            |                                     |                                                                   |     |      |                 |                 |                 |                 |                 |                                                                      | Hydrogen-oxidizing bacterium, max. respiration (in the presence of H <sub>2</sub> ) is ten times the endogenous rate                                                                                                                                                                      |
|                                      |                            |                                     |                                                                   |     |      |                 |                 |                 |                 |                 |                                                                      | Bacteria isolated from enrichments with benzhydrol as the sole carbon source.                                                                                                                                                                                                             |
|                                      |                            |                                     |                                                                   |     |      |                 |                 |                 |                 |                 |                                                                      | Bacterium isolated from the top 5 cm of soil in a beech wood in Northern Ireland                                                                                                                                                                                                          |
|                                      |                            |                                     |                                                                   |     |      |                 |                 |                 |                 |                 |                                                                      | Purple sulfur bacteria isolated from the chemocline of meromictic Mahoney Lake (British Columbia, Canada)                                                                                                                                                                                 |
|                                      |                            |                                     |                                                                   |     |      |                 |                 |                 |                 |                 |                                                                      | Endogenous respiration of cells with visible sulfur globules is lower, 5.7 nmol O <sub>2</sub> (mg protein) <sup>-1</sup> min <sup>-1</sup>                                                                                                                                               |
|                                      |                            |                                     |                                                                   |     |      |                 |                 |                 |                 |                 |                                                                      | Purple sulfur bacteria                                                                                                                                                                                                                                                                    |
|                                      |                            |                                     |                                                                   |     |      |                 |                 |                 |                 |                 |                                                                      | Endogenous respiration of cells with visible sulfur globules is higher, up to 22 nmol O <sub>2</sub> (mg protein) <sup>-1</sup> min <sup>-1</sup>                                                                                                                                         |

|                                                  |                                  |                                    |                                                                  |     |      |      |    |      |       |                                                                                                                         |                                                                                                                                                                                                                                                                                                                                                  |                                                                                                                                                                                                                                                                                                                                                                                                                                                                                                                                                                                                              |
|--------------------------------------------------|----------------------------------|------------------------------------|------------------------------------------------------------------|-----|------|------|----|------|-------|-------------------------------------------------------------------------------------------------------------------------|--------------------------------------------------------------------------------------------------------------------------------------------------------------------------------------------------------------------------------------------------------------------------------------------------------------------------------------------------|--------------------------------------------------------------------------------------------------------------------------------------------------------------------------------------------------------------------------------------------------------------------------------------------------------------------------------------------------------------------------------------------------------------------------------------------------------------------------------------------------------------------------------------------------------------------------------------------------------------|
| Amoebobaeter pendens (5813)                      | 24.Amoebobaeter pendens          | Gamma proteobacteria: Chromatiales | nmol O <sub>2</sub> (mg protein) <sup>-1</sup> min <sup>-1</sup> | MIN | 7.6  | 8.5  | 30 | 6.01 | [5]   | Overmann & Pfennig 1992[BM9, genus, spherical cells 1.5-3 µm diam]                                                      | (microaerobically) grown cells do not differ; the species is capable of chemotrophic growth in the dark.<br>Respiration of cells without microscopically visible sulfure globules at oxygen concentrations of 11-67 µM; respiration rates of phototrophically (anaerobically) and chemotrophically (microaerobically) grown cells do not differ. | Purple sulfur bacteria<br>Endogenous respiration of cells with visible sulfur globules is higher, up to 35 nmol O <sub>2</sub> (mg protein) <sup>-1</sup> min <sup>-1</sup>                                                                                                                                                                                                                                                                                                                                                                                                                                  |
| Spirillum (Aquaspirillum) itersonii (ATCC 12639) | 25.Aquaspirillum itersonii       | Beta proteobacteria: Neisseriales  | µl O <sub>2</sub> (mg DM) <sup>-1</sup> hr <sup>-1</sup>         | MIN | 6    | 10   | 30 | 7.07 | [0.9] | Jurtshuk & McQuitty 1976 [Krieg 1976, helical shape, Fig. 1E, Table 3, diam 0.3-0.4 µm, full length ~10 µm] Ensign 1970 | Cells harvested at the late-logarithmic growth phase (two thirds of the maximal growth concentration)                                                                                                                                                                                                                                            |                                                                                                                                                                                                                                                                                                                                                                                                                                                                                                                                                                                                              |
| Arthrobacter tallopoietes                        | 26.Arthrobacter crystallopoietes | Actinobacteria: Actinomycetales    | µl O <sub>2</sub> (mg DM) <sup>-1</sup> hr <sup>-1</sup>         | MIN | 0.1  | 0.2  | 30 | 0.14 | 1.7   |                                                                                                                         | Cells harvested during the exponential phase of growth (48 hr for spherical cells, 4-8 hr for rods); stable endogenous respiration during 24 days of starvation at 100% viability                                                                                                                                                                | cell mass estimated from the dry mass data for spherical cells (0.5 mg dry mass per 10 <sup>9</sup> cells)<br>Endogenous respiration at harvest was about 8-9 µl O <sub>2</sub> (mg DM) <sup>-1</sup> hr <sup>-1</sup> and decreased 80-fold during the first two days of starvation<br>Growing spherical cells contain about 40% (dry mass) of a glycogen-like polysaccharide; rods — 10% (Boylen & Ensign 1970)<br>Boylen 1973: Bacteria of this species survived 6 months of extreme desiccation at 50% viability converting 0.0005% of their carbon per hour to carbon dioxide (≈ 10 <sup>-2</sup> W/kg) |
| Arthrobacter globiformis (ATCC 8010)             | 27.Arthrobacter globiformis      | Actinobacteria: Actinomycetales    | µl O <sub>2</sub> (mg DM) <sup>-1</sup> hr <sup>-1</sup>         | MIN | 5    | 8.3  | 30 | 5.87 | [0.5] | Jurtshuk & McQuitty 1976 [Conn & Dimmick 1947, rods 0.6-0.8x1-1.5 µm] Luscombe & Gray 1974                              | Cells harvested at the late-logarithmic growth phase (two thirds of the maximal growth concentration)                                                                                                                                                                                                                                            |                                                                                                                                                                                                                                                                                                                                                                                                                                                                                                                                                                                                              |
| Arthrobacter globiformis (NCIB)                  | 28.Arthrobacter sp.              | Actinobacteria: Actinomycetales    | µl O <sub>2</sub> (mg DM) <sup>-1</sup> hr <sup>-1</sup>         | MIN | 0.45 | 0.75 | 25 | 0.75 | 0.2   |                                                                                                                         | Cells harvested from continuous cultures                                                                                                                                                                                                                                                                                                         | Cocci survive better than rods; initial endogenous respiration was 1.74 and                                                                                                                                                                                                                                                                                                                                                                                                                                                                                                                                  |

10683)

|                                       |                             |                                       |                                                                 |     |      |     |    |       |       |                                                                                                                                     |                                                                                                                                      |                                                                                                                                                                                                                                                                                                                                                                                                                                                                                                                                                                                                      |
|---------------------------------------|-----------------------------|---------------------------------------|-----------------------------------------------------------------|-----|------|-----|----|-------|-------|-------------------------------------------------------------------------------------------------------------------------------------|--------------------------------------------------------------------------------------------------------------------------------------|------------------------------------------------------------------------------------------------------------------------------------------------------------------------------------------------------------------------------------------------------------------------------------------------------------------------------------------------------------------------------------------------------------------------------------------------------------------------------------------------------------------------------------------------------------------------------------------------------|
| Arthrobacter sp.                      | 29.Arthrobacter sp.         | Actinobacteria: Actinomycetales       | $\mu\text{l O}_2 \text{ (15 mg DM)}^{-1} \text{ (20 min)}^{-1}$ | MIN | 3.6  | 1.2 | 30 | 0.85  | [1.5] | Devi et al. 1975 [BM9, genus, rods 0.8-1.2×1-8 $\mu\text{m}$ ; Devi et al. 1975 indicate their strain is 2 $\mu\text{m}$ in length] | Bacteria grown for 48 hr; endogenous respiration of resting cells measured for 80 min; data taken for the last 20 min                | and starved for more than 2 days, steady-state viability approximately 80%.<br>7.33 $\mu\text{l O}_2 \text{ (mg DM)}^{-1} \text{ hr}^{-1}$ for cocci and rods, respectively, but “after 2 days these had both fallen to a relatively stable level of 0.45”, which was monitored for 7 days.<br>Cell volume corresponds to the minimum dilution rate (0.01 $\text{h}^{-1}$ ); it grows up to 0.96 $\mu\text{m}^3$ at 0.3 $\text{h}^{-1}$ .<br>Data from Fig. 4a (induced cells), last 20 min of endogenous respiration; bacteria living in soil of Citrus plantations; rods 2 $\mu\text{m}$ in length |
| Arthrobacter (TMP)                    | 30.Arthrobacter sp.         | Actinobacteria: Actinomycetales       | $\mu\text{l O}_2 \text{ (50 mg WM)}^{-1} \text{ min}^{-1}$      | MIN | 0.9  | 6   | 30 | 4.24  |       | Donnelly et al. 1981                                                                                                                | Cells harvested during exponential growth                                                                                            | Respiration decreases with time (mean 2.3 W/kg)<br>Isolated from soil                                                                                                                                                                                                                                                                                                                                                                                                                                                                                                                                |
| Arthrobacter (CA1)                    | 31.Arthrobacter sp.         | Actinobacteria: Actinomycetales       | $\mu\text{mol O}_2 \text{ (5.3 mg DM)}^{-1} \text{ hr}^{-1}$    | MIN | 2    | 14  | 30 | 9.90  |       | Ougham & Trudgill 1982                                                                                                              | Bacteria harvested at late logarithmic phase; respiration measured for 2 hr                                                          | Bacteria isolated from field soil contaminated by aviation fuel, UK                                                                                                                                                                                                                                                                                                                                                                                                                                                                                                                                  |
| Azotobacter agile                     | 32.Azomonas agilis?         | Gammaproteobacteria: Pseudomonadales  | $\mu\text{l O}_2 \text{ (mg DM)}^{-1} \text{ hr}^{-1}$          | MIN | 12.6 | 21  | 26 | 19.59 | 13    | Gunter & Kohn 1956                                                                                                                  | Cells harvested from 16 to 18-hr yeast agar plates                                                                                   | Cell mass estimated from dry mass data, Table 1, 3.8 pg DM/cell                                                                                                                                                                                                                                                                                                                                                                                                                                                                                                                                      |
| Azorhizobium caulinodans (ORS571)     | 33.Azorhizobium caulinodans | Alphaproteobacteria: Rhizobiales      | $\text{nmol O}_2 \text{ (mg protein)}^{-1} \text{ min}^{-1}$    | MIN | 34   | 38  | 30 | 26.87 | [0.5] | Allen et al. 1991 [BM9, rods 0.5-0.6×1.5-2.5 $\mu\text{m}$ ]                                                                        | Endogenous respiration of cells taken from continuous culture; measured for 10 min                                                   |                                                                                                                                                                                                                                                                                                                                                                                                                                                                                                                                                                                                      |
| Azospirillum brasiliense (ATCC 29145) | 34.Azospirillum brasiliense | Alphaproteobacteria: Rhodospirillales | $\mu\text{mol O}_2 \text{ (mg protein)}^{-1} \text{ min}^{-1}$  | MIN | 0.02 | 27  | 37 | 11.75 | [1]   | Loh et al. 1984 [BM, species image]                                                                                                 | cells harvested during mid log-phase, starved for 4 hr at 4 C; constant respiration rate throughout the experiment ( $\approx$ 4 hr) |                                                                                                                                                                                                                                                                                                                                                                                                                                                                                                                                                                                                      |
| Azospirillum lipoferum (ATCC 29707)   | 35.Azospirillum lipoferum   | Alphaproteobacteria: Rhodospirillales | $\mu\text{mol O}_2 \text{ (mg protein)}^{-1} \text{ min}^{-1}$  | MIN | 0.03 | 39  | 37 | 16.98 | [4]   | Loh et al. 1984 [BM, species image]                                                                                                 | cells harvested during mid log-phase, washed and starved for 4 hr at 4 C                                                             | Synonym Spirillum lipoferum (BM)                                                                                                                                                                                                                                                                                                                                                                                                                                                                                                                                                                     |
| Azotobacter chroococcum (NCIB 8003)   | 36.Azotobacter chroococcum  | Gammaproteobacteria: Pseudomonadales  | $\mu\text{l O}_2 \text{ (mg DM)}^{-1} \text{ hr}^{-1}$          | MIN | 15   | 25  | 30 | 17.68 | [14]  | Bishop et al. 1962 [Bisset & Hale 1958, Figs. 1-3, 7, 13, diam approx. 3 $\mu\text{m}$ ]                                            | Respiration measured immediately after harvesting the cells (aerobic culture) at the end of the logarithmic growth phase             | Max. resp. (in the presence of glucose) was 130 $\mu\text{l O}_2 \text{ (mg DM)}^{-1} \text{ hr}^{-1}$                                                                                                                                                                                                                                                                                                                                                                                                                                                                                               |
| Azotobacter vinelandii (O)            | 37.Azotobacter vinelandii   | Gammaproteobacteria: Pseudomonadales  | $\mu\text{l O}_2 \text{ (mg DM)}^{-1} \text{ hr}^{-1}$          | MIN | 0.9  | 1.5 | 30 | 1.06  | [0.5] | Sobek et al. 1966 [Tsai et al. 1979, Fig. 3, diam 1 $\mu\text{m}$ , ATCC 12837, $\approx$ 0.06 pgDM/cell, Fig. 1]                   | Respiration of glucose-grown cells harvested at 20 hr and starved for 48 hr (Table 1); viability >95% (Fig. 2)                       | During starvation respiration diminishes from 4.6-5.8 $\mu\text{l O}_2 \text{ (mg DM)}^{-1} \text{ hr}^{-1}$ (depending on growth substrate) during the first four hours and to 0.9-1.4 $\mu\text{l O}_2 \text{ (mg DM)}^{-1} \text{ hr}^{-1}$ between 48th and 52th hours                                                                                                                                                                                                                                                                                                                           |

|                                        |                           |                                      |                                                        |     |     |     |    |      |       |       |                                                                                                                                   |                                                                                                        |                                                                                                                                                                                                                                                                                               |                                                                                                                                                                                                        |
|----------------------------------------|---------------------------|--------------------------------------|--------------------------------------------------------|-----|-----|-----|----|------|-------|-------|-----------------------------------------------------------------------------------------------------------------------------------|--------------------------------------------------------------------------------------------------------|-----------------------------------------------------------------------------------------------------------------------------------------------------------------------------------------------------------------------------------------------------------------------------------------------|--------------------------------------------------------------------------------------------------------------------------------------------------------------------------------------------------------|
|                                        |                           |                                      |                                                        |     |     |     |    |      |       |       |                                                                                                                                   |                                                                                                        | Johnson et al. 1958 report that "well-washed cells of this organism possess no significant endogenous respiration"                                                                                                                                                                            | Viability and respiration depend on the remaining store of PHB (poly-β-hydroxybutyric acid). 16-hr grown cultures were deprived of significant PHB stores and rapidly lost viability during starvation |
| Azotobacter vinelandii (O, ATCC 12518) | 38.Azotobacter vinelandii | Gammaproteobacteria: Pseudomonadales | $\mu\text{l O}_2 \text{ (mg DM)}^{-1} \text{ hr}^{-1}$ |     |     | 19  | 30 | 30   | 21.21 | [0.5] | Jurtshuk & McQuitty 1976 [Tsai et al. 1979, Fig. 3, diam 1 $\mu\text{m}$ , ATCC 12837, $\approx 0.06 \text{ pgDM/cell}$ , Fig. 1] | Cells harvested at the late-logarithmic growth phase (two thirds of the maximal growth concentration)  | Jurtshuk et al. 1975: Strain O cells grown to the late logarithmic phase, washed and "allowed to sit overnight at 4 C to reduce the intracellular endogenous reserve by starvation"; respiration at 30 C was 9-12 $\mu\text{l O}_2 \text{ (mg DM)}^{-1} \text{ hr}^{-1} = 15-20 \text{ W/kg}$ |                                                                                                                                                                                                        |
| Bacillus cereus (C5-25)                | 39.Bacillus cereus        | "Bacilli": Bacillales                | $\mu\text{l O}_2 \text{ (mg DM)}^{-1} \text{ hr}^{-1}$ | MIN | 8.5 | 14  | 37 | 6.09 |       | [3.7] | Nickerson & Sherman 1952 [BM, species]                                                                                            | Normal (not filamentous) cells grown for 18 hr; respiration measured for about 1.5 hr; data of Table 3 | N/D M=0.100-0.141                                                                                                                                                                                                                                                                             |                                                                                                                                                                                                        |
| Bacillus cereus (USDA)                 | 40.Bacillus cereus        | "Bacilli": Bacillales                | $\mu\text{l O}_2 \text{ (mg N)}^{-1} \text{ hr}^{-1}$  |     |     | 188 | 31 | 30   | 21.92 | [3.7] | Dietrich & Burris 1967 [BM, species]                                                                                              | Cells cultured for 2 weeks; respiration measured for 1 hr after 10 min equilibration                   | Church & Halvorson 1957 report 5 $\mu\text{l O}_2 \text{ (mg N)}^{-1} \text{ hr}^{-1} = 0.8 \text{ W/kg}$ at 30 C; heat-shocked spores stored for 4-48 months at -20 C                                                                                                                        |                                                                                                                                                                                                        |
| Bacillus cereus                        | 41.Bacillus cereus        | "Bacilli": Bacillales                | $\mu\text{l O}_2 \text{ (mg DM)}^{-1} \text{ hr}^{-1}$ |     |     | 56  | 97 | 30   | 68.59 | [3.7] | Jurtshuk & McQuitty 1976 [BM, species]                                                                                            | Cells harvested at the late-logarithmic growth phase (two thirds of the maximal growth concentration)  |                                                                                                                                                                                                                                                                                               |                                                                                                                                                                                                        |
| Bacillus firmus (ATCC 14575)           | 42.Bacillus firmus        | "Bacilli": Bacillales                | $\mu\text{l O}_2 \text{ (mg DM)}^{-1} \text{ hr}^{-1}$ | MIN | 8   | 13  | 30 | 9.19 |       | [0.9] | Jurtshuk & McQuitty 1976 [Kanso et al. 2002, rods 0.6-0.9x1.2-4 $\mu\text{m}$ ]                                                   | Cells harvested at the late-logarithmic growth phase (two thirds of the maximal growth concentration)  |                                                                                                                                                                                                                                                                                               |                                                                                                                                                                                                        |
| Bacillus megaterium                    | 43.Bacillus megate-       | "Bacilli": Bacillales                | $\mu\text{l O}_2 \text{ (mg DM)}^{-1} \text{ hr}^{-1}$ | MIN | 2   | 3.3 | 30 | 2.33 |       | [7]   | Jurtshuk &                                                                                                                        | Cells harvested at the                                                                                 |                                                                                                                                                                                                                                                                                               |                                                                                                                                                                                                        |



| Strain                             | Reference                      | Taxonomy              | Medium                                                              | Temperature (°C) | pH  | Time (min) | Yield (mg) | Yield (DM) | Yield (O <sub>2</sub> )                                       | Yield (O <sub>2</sub> /DM)                                                                                                                                                                    | Notes                                                                                                                                                                     |                                                                                                                                                  |
|------------------------------------|--------------------------------|-----------------------|---------------------------------------------------------------------|------------------|-----|------------|------------|------------|---------------------------------------------------------------|-----------------------------------------------------------------------------------------------------------------------------------------------------------------------------------------------|---------------------------------------------------------------------------------------------------------------------------------------------------------------------------|--------------------------------------------------------------------------------------------------------------------------------------------------|
|                                    |                                |                       | DM) <sup>-1</sup> hr <sup>-1</sup>                                  |                  |     |            |            |            |                                                               | [[1.96]]                                                                                                                                                                                      | McQuitty 1976 [Bisset 1953, Fig. 17, rods 1.4×4.3 μm] [[Kubitschek 1969, Coulter counter]] late-logarithmic growth phase (two thirds of the maximal growth concentration) |                                                                                                                                                  |
| Bacillus megaterium (KM)           | 44.Bacillus megaterium         | “Bacilli”: Bacillales | μl O <sub>2</sub> (mg DM) <sup>-1</sup> hr <sup>-1</sup>            | 7.7              | 13  | 30         | 9.19       | [7]        | Frederick et al. 1974 [Bisset 1953, Fig. 17, rods 1.4×4.3 μm] | Flasks with washed cells equilibrated in Warburg bath for a total of 30 min; respiration measured for at least 60 min; respiration of cells starved for 2 hr (by shaking in phosphate buffer) | Obligately aerobic asporogenous strain<br>Respiration of unstarved cells was 11 μl O <sub>2</sub> (mg DM) <sup>-1</sup> hr <sup>-1</sup>                                  |                                                                                                                                                  |
| Bacillus megaterium (ATCC 19213)   | 45.Bacillus megaterium         | “Bacilli”: Bacillales | natoms O (mg protein) <sup>-1</sup> min <sup>-1</sup>               | <40              | 25  | 30         | 17.68      | [7]        | Decker & Lang 1977 [Bisset 1953, Fig. 17, rods 1.4×4.3 μm]    | Log-phase harvested cells (strain ATCC 19213) respired at a rate of less than 10% of 400 natoms O (mg protein) <sup>-1</sup> min <sup>-1</sup> = 25 W/kg; respiration measured for 1 min      |                                                                                                                                                                           |                                                                                                                                                  |
| Bacillus megaterium (NCTC 9848)    | 46.Bacillus megaterium         | “Bacilli”: Bacillales | μl O <sub>2</sub> (mg DM) <sup>-1</sup> hr <sup>-1</sup>            | 28               | 47  | 37         | 20.46      | [7]        | Bishop et al. 1962 [Bisset 1953, Fig. 17, rods 1.4×4.3 μm]    | Cells harvested at the end of the logarithmic growth phase                                                                                                                                    |                                                                                                                                                                           |                                                                                                                                                  |
| Bacillus megaterium (KM)           | 47.Bacillus megaterium         | “Bacilli”: Bacillales | μl O <sub>2</sub> (mg DM) <sup>-1</sup> hr <sup>-1</sup>            | 35               | 58  | 25         | 58.00      | [7]        | Marquis 1965 [Bisset 1953, Fig. 17, rods 1.4×4.3 μm]          | Cells harvested in the phase of declining growth rate; respiration measured for 90 min                                                                                                        |                                                                                                                                                                           |                                                                                                                                                  |
| Bacillus popilliae (NRRL B-2309-P) | 48.Bacillus popilliae          | “Bacilli”: Bacillales | μl O <sub>2</sub> (mg DM) <sup>-1</sup> hr <sup>-1</sup>            | MIN              | 0.5 | 0.8        | 30         | 0.57       | [0.8]                                                         | Pepper & Costilow 1964 [Mitraka et al. 1967, Fig. 1, rods 0.6×2-4 μm]                                                                                                                         | Cells harvested in the stationary phase after 24 hr incubation                                                                                                            | Bacterium causing "milky disease" of the Japanese beetle (Popilla japonica) larvae<br>Similar respiration rates were measured for B. lentimorbus |
| Bacillus pumilus (ATCC 70)         | 49.Bacillus pumilus            | “Bacilli”: Bacillales | μl O <sub>2</sub> (mg DM) <sup>-1</sup> hr <sup>-1</sup>            | MIN              | 3   | 5          | 30         | 3.54       | [0.7]                                                         | Jurtshuk & McQuitty 1976 [Hayase et al. 2004, rods 0.5-0.7×2.0-3.0 μm]                                                                                                                        | Cells harvested at the late-logarithmic growth phase (two thirds of the maximal growth concentration)                                                                     |                                                                                                                                                  |
| Bacillus stearothermophilus (PH24) | 50.Bacillus stearothermophilus | “Bacilli”: Bacillales | μl O <sub>2</sub> (14.2 mg DM) <sup>-1</sup> (30 min) <sup>-1</sup> | MIN              | 35  | 8.2        | 50         | 1.45       | [0.7]                                                         | Buswell 1975 [Montesinos et al. 1983, Coulter counter]                                                                                                                                        | Cells harvested in late exponential phase (14-16 hr of growth on phenol) at 55 C and either used immediately or stored at -20 C; respiration measured for 30 min          | The organism, obligate thermophile, was isolated from industrial sediment at Ravenscraig Steel Works near Motherwell, Scotland.                  |
| Bacillus subtilis (W-)             | 51.Bacillus subtilis           | “Bacilli”: Bacillales | μl O <sub>2</sub> (mg MIN)                                          | 2                | 3.3 | 30         | 2.33       | [1.4]      | Jurtshuk &                                                    | Cells harvested at the                                                                                                                                                                        | Crook 1952 reports 4-5 μl O <sub>2</sub> (mg                                                                                                                              |                                                                                                                                                  |



| Strain                           | Genus                       | Species | Phylum                               | Class | Order | Family | Genus | Species | Strain                      | Reference                                                                                                      | Notes                                                                                                                                                                                                                                                                                                                                                                                                                                                                    |                                                                                                                                                                                                                                                                                  |
|----------------------------------|-----------------------------|---------|--------------------------------------|-------|-------|--------|-------|---------|-----------------------------|----------------------------------------------------------------------------------------------------------------|--------------------------------------------------------------------------------------------------------------------------------------------------------------------------------------------------------------------------------------------------------------------------------------------------------------------------------------------------------------------------------------------------------------------------------------------------------------------------|----------------------------------------------------------------------------------------------------------------------------------------------------------------------------------------------------------------------------------------------------------------------------------|
| rioovorus (109J)                 | bacterioovorus              |         | Bdellovibrionales                    |       |       |        |       |         | 17.3                        | 1973 [DM=10 <sup>-13</sup> pg/cell]                                                                            | 24 hr in a medium containing E. coli cells that were all lysed by the time of harvest; respiration measured for 2-4 hr<br><br>Rittenberg & Shilo 1970: 13-27 nmol O <sub>2</sub> (0.42 mg protein) <sup>-1</sup> min <sup>-1</sup> = 35-72 W/kg at 30 C                                                                                                                                                                                                                  | Rittenberg & Shilo 1970 report 0.42 mg protein per 10 <sup>10</sup> cells of strain 109<br><br>Straley et al. (1979) characterize this respiration rate as "unusually high"; Friedberg & Friedberg (1976) as "extremely high"                                                    |
| Pseudomonas natriegens           | 57.Beneckea natriegens      |         | Gammaproteobacteria: "Vibrionales"   |       |       |        |       |         | MIN 85 265 30 187.38 [1.5]  | Cho & Eagon 1967 [Baumann et al. 1971, Figs. 12, 16, rods 0.6-1.2x1.9-3.6 µm depending on culture conditions?] | Cells harvested at the end of the logarithmic phase; respiration of resting cells measured for 45 min<br><br>Oxygen uptake with all substrates is characterized as "low" (the lowest with glucose, 268 µl O <sub>2</sub> (mg DM) <sup>-1</sup> hr <sup>-1</sup> = 450 W/kg is within the upper range of maximum specific metabolic rates in bacteria<br><br>Marine bacterium with shortest known generation time (9.8 min) (Eagon 1962)<br><br>Synonym Vibrio natriegens |                                                                                                                                                                                                                                                                                  |
| Bradyrhizobium japonicum (I-110) | 58.Bradyrhizobium japonicum |         | Alphaproteobacteria: Rhizobiales     |       |       |        |       |         | MIN 53 1.0 29 0.76 [0.7]    | Frustaci et al. 1991 [BM]                                                                                      | Respiration of late-log phase cells                                                                                                                                                                                                                                                                                                                                                                                                                                      |                                                                                                                                                                                                                                                                                  |
| Neisseria catarrhalis            | 59.Branhamella catarrhalis  |         | Gammaproteobacteria: Pseudomonadales |       |       |        |       |         | MIN 1 1.7 37 0.74 [1.3]     | Bishop et al. 1962 [Baumann et al. 1968, diam 1.0-1.7 µm, coccoid]                                             | Respiration measured immediately after harvesting the cells at the end of the logarithmic growth phase                                                                                                                                                                                                                                                                                                                                                                   | Max. resp. (in the presence of glucose) was 10 µl O <sub>2</sub> (mg DM) <sup>-1</sup> hr <sup>-1</sup>                                                                                                                                                                          |
| Branhamella catarrhalis (Gp4)    | 60.Branhamella catarrhalis  |         | Gammaproteobacteria: Pseudomonadales |       |       |        |       |         | 14 23 30 16.26 [1.3]        | Jurtshuk & McQuitty 1976 [Baumann et al. 1968, diam 1.0-1.7 µm, coccoid]                                       | Cells harvested at the late-logarithmic growth phase (two thirds of the maximal growth concentration)                                                                                                                                                                                                                                                                                                                                                                    | Respiration of Branhamella (Neisseria) catarrhalis (ATCC 25238) and Branhamella catarrhalis (NC31) was 16 and 17 µl O <sub>2</sub> (mg DM) <sup>-1</sup> hr <sup>-1</sup> , respectively (27-28 W/kg)                                                                            |
| Brucella abortus (19)            | 61.Brucella melitensis      |         | Alphaproteobacteria: Rhizobiales     |       |       |        |       |         | MIN 40-82 6.5 34 3.48 [0.3] | Gerhard et al. 1950 [BM9, genus, cocci or short rods 0.5-0.7x0.6-1.5 µm]                                       | Cells grown for 24 hr; respiration varies among equally prepared suspensions                                                                                                                                                                                                                                                                                                                                                                                             |                                                                                                                                                                                                                                                                                  |
| Burkholderia sp. (JT 1500)       | 62.Burkholderia sp.         |         | Betaproteobacteria: Burkholderiales  |       |       |        |       |         | MIN 19 21 30 14.85 0.7      | Morawski et al. 1997 [rods 0.5-0.8x1.5-3.0]                                                                    | Cells grown for 15-18 hr                                                                                                                                                                                                                                                                                                                                                                                                                                                 | Bacterium isolated from Miami soil                                                                                                                                                                                                                                               |
| Cellvibrio gilvus                | 63.Cellvibrio gilvus        |         | Gammaproteobacteria: Pseudomonadales |       |       |        |       |         | MIN 10 37 30 26.16 2        | Hulcher & King 1958a [Hulcher & King 1958b, rods 0.75-1.5x1.5-3.75 µm]                                         | Cells grown on cellobiose for 18 hr at room temperature                                                                                                                                                                                                                                                                                                                                                                                                                  | Cells in young cultures are very large (3x10 µm), 24-hr cells grown on cellulose were 0.3-0.5x0.8-1.5 µm (Hulcher & King 1958b)<br><br>There is no such species at <a href="http://www.bacterio.cict.fr">http://www.bacterio.cict.fr</a> ; higher taxon as for Cellvibrio genus. |

|                                                 |                                |  |                                 |                                 |                                                                     |     |     |     |    |       |                |                                                                                       |                                                                                                                                                                                                                                                                                                                                                           |                                                                                                                                                                                                                                                                         |
|-------------------------------------------------|--------------------------------|--|---------------------------------|---------------------------------|---------------------------------------------------------------------|-----|-----|-----|----|-------|----------------|---------------------------------------------------------------------------------------|-----------------------------------------------------------------------------------------------------------------------------------------------------------------------------------------------------------------------------------------------------------------------------------------------------------------------------------------------------------|-------------------------------------------------------------------------------------------------------------------------------------------------------------------------------------------------------------------------------------------------------------------------|
| Chromatium sp. (Miami PBS1071)                  | 64.Chromatium sp.              |  | Gamma                           | proteobacteria: Chromatiales    | nmol O <sub>2</sub> (mg DM) <sup>-1</sup> min <sup>-1</sup>         | MIN | 4.8 | 11  | 25 | 11.00 |                | Kumazawa et al. 1983 [BM9 genus: rods 1-6×1.5-15 μm]                                  | 2-3 days' old cultures grown anaerobically in the light; respiration increased severalfold upon addition of H <sub>2</sub> and fell to the endogenous level after H <sub>2</sub> was exhausted                                                                                                                                                            | Marine purple sulfur bacterium                                                                                                                                                                                                                                          |
| Chromatium vinosum (2811)                       | 65.Chromatium vinosum          |  | Gamma                           | proteobacteria: Chromatiales    | nmol O <sub>2</sub> (mg protein) <sup>-1</sup> min <sup>-1</sup>    | MIN | 2.0 | 2.2 | 30 | 1.56  | [1.5] [[1.21]] | Overmann & Pfennig 1992 [Montesinos et al. 1983, Coulter counter] [[Mas et al. 1985]] | Respiration of cells without microscopically visible sulfure globules at oxygen concentrations of 11-67 μM; respiration rates of phototrophically (anaerobically) and chemotrophically (microaerobically) grown cells do not differ; the species is capable of chemotrophic growth in the dark.                                                           | Purple sulfur bacteria<br>Respiration rate increases with oxygen concentration reaching a plateau at approx. 6 μM.<br>Endogenous respiration of cells with visible sulfur globules is higher, up to 24 nmol O <sub>2</sub> (mg protein) <sup>-1</sup> min <sup>-1</sup> |
| Corynebacterium diphtheriae (ATCC 11913)        | 66.Corynebacterium diphtheriae |  | Actinobacteria: Actinomycetales |                                 | μl O <sub>2</sub> (mg DM) <sup>-1</sup> hr <sup>-1</sup>            | MIN | 4   | 6.7 | 30 | 4.74  |                | Jurtshuk & McQuitty 1976 [                                                            | Cells harvested at the late-logarithmic growth phase (two thirds of the maximal growth concentration)                                                                                                                                                                                                                                                     |                                                                                                                                                                                                                                                                         |
| Corynebacterium sp.                             | 67.Corynebacterium sp.         |  | Actinobacteria: Actinomycetales |                                 | μl O <sub>2</sub> (100 mg WM) <sup>-1</sup> (120 min) <sup>-1</sup> | MIN | 180 | 10  | 30 | 7.07  |                | Levine & Kram-pitz 1952                                                               | Cells harvested after 2-4 days growth; respiration measured for 2 hr                                                                                                                                                                                                                                                                                      | A soil-isolated bacterium sometimes capable of acetone degradation                                                                                                                                                                                                      |
| Pseudomonas acidovorans (ATCC 17455=NCIB 10013) | 68.Delftia acidovorans         |  | Beta                            | proteobacteria: Burkholderiales | μl O <sub>2</sub> (4 mg DM) <sup>-1</sup> min <sup>-1</sup>         | MIN | 0.5 | 13  | 30 | 9.19  | [0.8]          | Hareland et al. 1975 [Wen et al. 1999, rods, 0.4-0.8×2.5-4.1 μm]                      | Bacteria grown for 20 hr (end of logarithmic growth); respiration measured for about 10 min                                                                                                                                                                                                                                                               | Bacteria originally isolated from poultry house deep-litter                                                                                                                                                                                                             |
| Pseudomonas B <sub>2</sub> aba sp.              | 69.Delftia acidovorans         |  | Beta                            | proteobacteria: Burkholderiales | μl O <sub>2</sub> (mg DM) <sup>-1</sup> hr <sup>-1</sup>            |     | 8   | 13  | 30 | 9.19  | [0.8]          | Kornberg & Gotto 1961 [Wen et al. 1999, rods, 0.4-0.8×2.5-4.1 μm]                     | Cells grown on glycollate harvested during the logarithmic phase; for succinate-grown cells 10 μl O <sub>2</sub> (mg DM) <sup>-1</sup> hr <sup>-1</sup> (17 W/kg).<br>Cooper & Kornberg 1964: cells grown on itaconate harvested during the logarithmic phase, 39 μl O <sub>2</sub> (mg DM) <sup>-1</sup> hr <sup>-1</sup> = 65 W/kg; for succinate-grown |                                                                                                                                                                                                                                                                         |

|                                                |                             |        |                                          |                                                                     |     |      |     |    |       |       |                                                                                  |                                                                                                                                                                       |                                                                                      |
|------------------------------------------------|-----------------------------|--------|------------------------------------------|---------------------------------------------------------------------|-----|------|-----|----|-------|-------|----------------------------------------------------------------------------------|-----------------------------------------------------------------------------------------------------------------------------------------------------------------------|--------------------------------------------------------------------------------------|
| Pseudomonas desmolytica (S449B1)               | 70.Delftia vorans           | acido- | Betaproteobacteria: Burkholderiales      | $\mu\text{l O}_2$ (0.6 mg DM) <sup>-1</sup> (160 min) <sup>-1</sup> |     | 14   | 15  | 30 | 10.61 | [0.8] | Jigami et al. 1979 [Wen et al. 1999, rods, 0.4-0.8×2.5-4.1 $\mu\text{m}$ ]       | cells 40 $\mu\text{l O}_2$ (mg DM) <sup>-1</sup> hr <sup>-1</sup><br>Cells harvested after 3 days of growth                                                           |                                                                                      |
| Pseudomonas acidovorans (ATCC 15688)           | 71.Delftia vorans           | acido- | Betaproteobacteria: Burkholderiales      | $\mu\text{l O}_2$ (mg DM) <sup>-1</sup> hr <sup>-1</sup>            |     | 18   | 30  | 30 | 21.21 | [0.8] | Jurtshuk & McQuitty 1976 [Wen et al. 1999, rods, 0.4-0.8×2.5-4.1 $\mu\text{m}$ ] | Cells harvested at the late-logarithmic growth phase (two thirds of the maximal growth concentration)                                                                 |                                                                                      |
| Desulfovibrio salexigens (Mast1)               | 72.Desulfovibrio salexigens |        | Deltaproteobacteria: Desulfovibrionales  | nmol O <sub>2</sub> (mg protein) <sup>-1</sup> min <sup>-1</sup>    | MIN | 12   | 13  | 30 | 9.19  | [1.5] | van Niel & Gottschal 1998 [BM]                                                   | Cells harvested at the end of the exponential growth phase                                                                                                            | Organism isolated from the oxic-anoxic (top) layer of a marine microbial mat, Greece |
| Enterobacter aerogenes                         | 73.Enterobacter aerogenes   |        | Gammaproteobacteria: "Enterobacteriales" | $\mu\text{l O}_2$ (mg DM) <sup>-1</sup> hr <sup>-1</sup>            | MIN | 6    | 10  | 30 | 7.07  | [0.3] | Jurtshuk & McQuitty 1976 [Fu et al. 2003, rods 0.6×1.2 $\mu\text{m}$ ]           | Cells harvested at the late-logarithmic growth phase (two thirds of the maximal growth concentration)                                                                 |                                                                                      |
| Enterobacter cloacae (17/97)                   | 74.Enterobacter cloacae     |        | Gammaproteobacteria: "Enterobacteriales" | nmol O <sub>2</sub> (mg DM) <sup>-1</sup> min <sup>-1</sup>         | MIN | 13.9 | 31  | 30 | 21.92 | [0.9] | Majtán & Majtánová 1999 [BM9, genus, rods 0.6-1.0×1.2-3.0 $\mu\text{m}$ ]        | Cells harvested from the exponential phase; respiration measured for 10 min                                                                                           | Bacterium isolated from a patient suffering from nosocomial infection.               |
| Enterococcus cecorum (DSM 20682 <sup>T</sup> ) | 75.Enterococcus cecorum     |        | "Bacilli": "Lactobacillales"             | nmol O <sub>2</sub> (mg DM) <sup>-1</sup> min <sup>-1</sup>         | MIN | 1.7  | 3.8 | 30 | 2.69  | [0.4] | Bauer et al. 2000 [BM]                                                           | Respiration of cells from aerobically glucose-grown cultures; respiration of anaerobically grown cells <1 nmol O <sub>2</sub> (mg DM) <sup>-1</sup> min <sup>-1</sup> |                                                                                      |
| Streptococcus faecalis (NCDO 581)              | 76.Enterococcus faecalis    |        | "Bacilli": "Lactobacillales"             | $\mu\text{l O}_2$ (mg DM) <sup>-1</sup> hr <sup>-1</sup>            | MIN | 0.16 | 0.3 | 30 | 0.21  | [0.2] | Bryan-Jones & Whittenbury 1969 [BM]                                              | respiration of resting suspensions of cells grown aerobically with glucose                                                                                            |                                                                                      |
| Streptococcus faecalis (ATCC 8043)             | 77.Enterococcus hirae       |        | "Bacilli": "Lactobacillales"             | $\mu\text{mol O}_2$ (100 mg DM) <sup>-1</sup> (2 hr) <sup>-1</sup>  | MIN | 8.0  | 1.5 | 30 | 1.06  |       | Gronlund & Campbell 1961                                                         | Cells harvested after 17 hr growth; respiration measured for 2 hr                                                                                                     |                                                                                      |
| Enterococcus hirae (ATCC 8043, ATCC 9790)      | 78.Enterococcus hirae       |        | "Bacilli": "Lactobacillales"             | $\mu\text{l O}_2$ (mg DM) <sup>-1</sup> hr <sup>-1</sup>            |     | 1    | 1.7 | 30 | 1.20  |       | Jurtshuk & McQuitty 1976                                                         | Cells harvested at the late-logarithmic growth phase (two thirds of the maximal growth concentration)                                                                 |                                                                                      |
| Enterococcus sp. (RfL6)                        | 79.Enterococcus sp.         |        | "Bacilli": "Lactobacillales"             | nmol O <sub>2</sub> (mg DM) <sup>-1</sup> min <sup>-1</sup>         | MIN | 15.1 | 33  | 30 | 23.33 | 0.8   | Bauer et al. 2000 [rods, 0.6-1×1.1-3 $\mu\text{m}$ ]                             | Respiration of cells from aerobically glucose-grown cultures; respiration of anaerobically grown cells                                                                |                                                                                      |

|                                       |     |                  |                                          |                                                                    |     |       |     |    |       |       |                                                                                                                 |                                                                                                                                                                                                                                  |                                                                                                                                                                                                                                                                                                                         |
|---------------------------------------|-----|------------------|------------------------------------------|--------------------------------------------------------------------|-----|-------|-----|----|-------|-------|-----------------------------------------------------------------------------------------------------------------|----------------------------------------------------------------------------------------------------------------------------------------------------------------------------------------------------------------------------------|-------------------------------------------------------------------------------------------------------------------------------------------------------------------------------------------------------------------------------------------------------------------------------------------------------------------------|
| Escherichia coli (EMG-2 K12 Ymel)     | 80. | Escherichia coli | Gammaproteobacteria: "Enterobacteriales" | ngatom O (mg protein) <sup>-1</sup> min <sup>-1</sup>              | MIN | 58-86 | 32  | 37 | 14    | [0.7] | Lawford & Had-dock 1973 [Kubitschek 1969, Coulter counter, 0.33-1.46 μm <sup>3</sup> depending on growth rate]  | 15.1 nmol O <sub>2</sub> (mg DM) <sup>-1</sup> min <sup>-1</sup><br>Cells were grown to the early exponential phase and starved for 2 hr by vigorous shaking at 37 C; respiration varied (depending on carbon source for growth) |                                                                                                                                                                                                                                                                                                                         |
| Escherichia coli (W-1485)             | 81. | Escherichia coli | Gammaproteobacteria: "Enterobacteriales" | μl O <sub>2</sub> (mg DM) <sup>-1</sup> hr <sup>-1</sup>           |     | 2.7   | 4.5 | 26 | 4.20  | [0.7] | Gunter & Kohn 1956 [Kubitschek 1969, Coulter counter, 0.33-1.46 μm <sup>3</sup> depending on growth rate]       | Cells harvested from 16 to 18-hr yeast agar plates                                                                                                                                                                               |                                                                                                                                                                                                                                                                                                                         |
| Escherichia coli (O11a <sub>1</sub> ) | 82. | Escherichia coli | Gammaproteobacteria: "Enterobacteriales" | μl O <sub>2</sub> (mg DM) <sup>-1</sup> hr <sup>-1</sup>           |     | 4     | 6.7 | 30 | 4.74  | [0.7] | Jurtshuk & McQuitty 1976 [Kubitschek 1969, Coulter counter, 0.33-1.46 μm <sup>3</sup> depending on growth rate] | Cells harvested at the late-logarithmic growth phase (two thirds of the maximal growth concentration)                                                                                                                            | Respiration was 13, 7, 9, 10, 6, 8, 7, 6, and 5 μl O <sub>2</sub> (mg DM) <sup>-1</sup> hr <sup>-1</sup> for strains B, B/r, C, Crookes, K12, K12S UTH 2593, K12S UTH 3672, and F, respectively (8.3-22 W/kg).                                                                                                          |
| Escherichia coli                      | 83. | Escherichia coli | Gammaproteobacteria: "Enterobacteriales" | μl O <sub>2</sub> (mg DM) <sup>-1</sup> hr <sup>-1</sup>           |     | 7     | 12  | 37 | 5.22  | [0.7] | Dawes & Ribbons 1965 [Kubitschek 1969, Coulter counter, 0.33-1.46 μm <sup>3</sup> depending on growth rate]     | Stable respiration of aerobically grown cells harvested during the exponential phase and starved aerobically for 150-180 min; no loss of viability during 12 hr of starvation                                                    | "Stationary-phase cells respire endogenously at higher rates and contain larger reserves of glycogen, which is the initial substrate oxidized [than exponential-phase cells]. Carbohydrate content of exponential-phase cells drops rapidly together with endogenous respiration during the first 100 min of starvation |
| Escherichia coli (B)                  | 84. | Escherichia coli | Gammaproteobacteria: "Enterobacteriales" | μl O <sub>2</sub> (10 mg DM) <sup>-1</sup> (2 hr) <sup>-1</sup>    |     | 180   | 15  | 35 | 7.50  | [0.7] | Sobek & Talburt 1968 [Kubitschek 1969, Coulter counter, 0.33-1.46 μm <sup>3</sup> depending on growth rate]     | Cells grown for 20 hr at 35 C; respiration measured for 2 hr                                                                                                                                                                     |                                                                                                                                                                                                                                                                                                                         |
| Escherichia coli (ATCC 4157)          | 85. | Escherichia coli | Gammaproteobacteria: "Enterobacteriales" | μl O <sub>2</sub> (mg DM) <sup>-1</sup> hr <sup>-1</sup>           |     | 12    | 20  | 37 | 8.71  | [0.7] | Davis & Bateman 1960 [Kubitschek 1969, Coulter counter, 0.33-1.46 μm <sup>3</sup> depending on growth rate]     | Cells harvested after 16.5 hr growth at 37 C; respiration measured for 2 hr                                                                                                                                                      |                                                                                                                                                                                                                                                                                                                         |
| Escherichia coli (ATCC 6894)          | 86. | Escherichia coli | Gammaproteobacteria: "Enterobacteriales" | μmol O <sub>2</sub> (100 mg DM) <sup>-1</sup> (2 hr) <sup>-1</sup> |     | 79    | 15  | 30 | 10.61 | [0.7] | Gronlund & Campbell 1961 [Kubitschek 1969, Coulter counter, 0.33-1.46 μm <sup>3</sup> depending on              | Cells harvested after 20 hr growth; respiration measured for 2 hr                                                                                                                                                                |                                                                                                                                                                                                                                                                                                                         |

| Strain                                        | Reference                       | Phylum                 | Class               | Order | Family | Genus | Species | Strain ID | Medium | Temperature (°C) | pH | Light | Shaking | Respiration Rate (μl O <sub>2</sub> (mg N) <sup>-1</sup> hr <sup>-1</sup> ) | Notes |    |       |        |                                                                                                                            |                                                                                                                                                                                                     |                                                                                                                                                                                           |
|-----------------------------------------------|---------------------------------|------------------------|---------------------|-------|--------|-------|---------|-----------|--------|------------------|----|-------|---------|-----------------------------------------------------------------------------|-------|----|-------|--------|----------------------------------------------------------------------------------------------------------------------------|-----------------------------------------------------------------------------------------------------------------------------------------------------------------------------------------------------|-------------------------------------------------------------------------------------------------------------------------------------------------------------------------------------------|
| <i>Escherichia coli</i> (Gratia)              | 87.Escherichia coli             | Gammaproteobacteria:   | "Enterobacteriales" |       |        |       |         |           |        |                  |    |       |         | 105                                                                         | 17.5  | 30 | 12.37 | [0.7]  | growth rate] Dietrich & Burris 1967 [Kubitschek 1969, Coulter counter, 0.33-1.46 μm <sup>3</sup> depending on growth rate] | Cells cultured for 2 weeks; respiration measured for 1 hr after 10 min equilibration                                                                                                                | Bacteria "had a lower endogenous [respiration] ... if harvested during exponential growth than after reaching the stationary phase"                                                       |
| <i>Escherichia coli</i>                       | 88.Escherichia coli             | Gammaproteobacteria:   | "Enterobacteriales" |       |        |       |         |           |        |                  |    |       |         | 37                                                                          | 62    | 37 | 26.99 | [0.7]  | Bishop et al. 1962 [Kubitschek 1969, Coulter counter, 0.33-1.46 μm <sup>3</sup> depending on growth rate]                  | Respiration measured immediately after harvesting the cells (aerobic culture) at the end of the logarithmic growth phase                                                                            | Anaerobically grown culture respired at 2 μl O <sub>2</sub> (mg DM) <sup>-1</sup> hr <sup>-1</sup> = 3.3 W/kg                                                                             |
| <i>Flavobacterium capsulatum</i> (ATCC 14666) | 89.Flavobacterium capsulatum    | Flavobacteria:         | Flavobacteriales    |       |        |       |         |           |        |                  |    |       |         | 38                                                                          | 63    | 30 | 44.55 | [0.3]  | Jurtshuk & McQuitty 1976 [BM9, genus, rods 0.5×1.0-3.0 μm]                                                                 | Cells harvested at the late-logarithmic growth phase (two thirds of the maximal growth concentration)                                                                                               | Listed in ATCC as <i>Novosphingobium capsulatum</i>                                                                                                                                       |
| <i>Pasteurella tularensis</i> (SCHU S4, 38 A) | 90.Francisella tularensis       | Gammaproteobacteria:   | Thiotrichales       |       |        |       |         |           |        |                  |    |       |         | 22                                                                          | 3.7   | 37 | 1.61  | [0.01] | Weinstein et al. 1962 [BM9, rods 0.2×0.2-0.7 μm]                                                                           | Cells grown for 16 to 18 hr; respiration of strains 503, CHUR, JAP, LVS, and MAX was 60, 38, 53, 105, and 94 μl O <sub>2</sub> (mg N) <sup>-1</sup> hr <sup>-1</sup> , respectively (6.3-17.5 W/kg) |                                                                                                                                                                                           |
| <i>Frankia</i> (EAN1 <sub>pec</sub> ) sp.     | 91.Frankia sp.                  | Actinobacteria:        | Actinomycetales     |       |        |       |         |           |        |                  |    |       |         | 242                                                                         | 9     | 25 | 9.00  |        | Tisa & Ensign 1987 [BM, genus, hyphae 0.5-2.0 μm diam]                                                                     | Bacteria grown for 21 days                                                                                                                                                                          | Members of the genus <i>Frankia</i> are filamentous actinomycetes that infect roots and induce nodule formation in a variety of woody dicotyledonous plants.                              |
| <i>Haemophilus influenzae</i> (641b)          | 92.Haemophilus influenzae       | Gammaproteobacteria:   | Pasteurellales      |       |        |       |         |           |        |                  |    |       |         | 3                                                                           | 0.5   | 37 | 0.22  | [0.14] | Biberstein & Spencer 1962 [BM, coccobacilli or small regular rods 0.3-0.5 - 0.5-3.0 μm]                                    | Bacteria grown for 18-24 hr at 37 C; respiration of washed cells measured for 60 min                                                                                                                | Respiration of strains b, c, d, 525, and K 75 was 14, 6, 7, 32, and 9 μl O <sub>2</sub> (mg N) <sup>-1</sup> hr <sup>-1</sup> , respectively (1-5.3 W/kg).                                |
| <i>Haemophilus parahaemolyticus</i> (9796)    | 93.Haemophilus parahaemolyticus | Gammaproteobacteria:   | Pasteurellales      |       |        |       |         |           |        |                  |    |       |         | 21                                                                          | 3.5   | 37 | 1.52  |        | Biberstein & Spencer 1962                                                                                                  | Bacteria grown for 18-24 hr at 37 C; respiration of washed cells measured for 60 min                                                                                                                | Respiration of strain 7901 was 24 μl O <sub>2</sub> (mg N) <sup>-1</sup> hr <sup>-1</sup> (4 W/kg).                                                                                       |
| <i>Haemophilus parainfluenzae</i> (K 98)      | 94.Haemophilus parainfluenzae   | Gammaproteobacteria:   | Pasteurellales      |       |        |       |         |           |        |                  |    |       |         | 21                                                                          | 3.5   | 37 | 1.52  | [0.4]  | Biberstein & Spencer 1962 [Kahn 1981, Fig. 1, 0.6×1.3-1.7 μm; Kowalski et al. 1991, diam 0.75-1.25 μm]                     | Bacteria grown for 18-24 hr at 37 C; respiration of washed cells measured for 60 min                                                                                                                | Respiration of strains K 8, K 17, and K 45 was 24, 32, and 41 μl O <sub>2</sub> (mg N) <sup>-1</sup> hr <sup>-1</sup> , respectively (4-6.8 W/kg).                                        |
| <i>Halobacterium salinarum</i> (1)            | 95.Halobacterium salinarum      | Archaea: Halobacteria: | Halobacteriales     |       |        |       |         |           |        |                  |    |       |         | 10                                                                          | 17    | 30 | 12.02 | [3.9]  | Stevenson 1966 [Mescher & Strominger 1976,                                                                                 | Cells grown for about 70 hr to the end of the exponential phase                                                                                                                                     | White 1962: Stationary-phase cells (>15 hr old) have an insignificant endogenous respiration. Log-phase cells have a small endogenous respiratory rate. An extremely halophilic bacterium |

|                                                 |            |                                                   |                                          |                                                                  |     |      |     |    |       |       |                                                                                   |                                                                                                                                                                                                                  |                                                                                                                                                                                                                                                                                                                                                                                                                                |
|-------------------------------------------------|------------|---------------------------------------------------|------------------------------------------|------------------------------------------------------------------|-----|------|-----|----|-------|-------|-----------------------------------------------------------------------------------|------------------------------------------------------------------------------------------------------------------------------------------------------------------------------------------------------------------|--------------------------------------------------------------------------------------------------------------------------------------------------------------------------------------------------------------------------------------------------------------------------------------------------------------------------------------------------------------------------------------------------------------------------------|
| Micrococcus denitrificans                       | halo-      | 96.Halomonas halodenitrificans                    | Gammaproteobacteria: Oceanospirillales   | $\mu\text{l O}_2 \text{ (2 mg DM)}^{-1} \text{ (30 min)}^{-1}$   | MIN | 40   | 67  | 25 | 67.00 | [0.4] | Sierra & Gibbons 1962 [Ventosa et al. 1998, rods, 0.5-0.9x0.9-1.2 $\mu\text{m}$ ] | Cells harvested towards the end of the logarithmic phase (about 40 hr)                                                                                                                                           | Endogenous respiration and viability of starved cells remained constant at around $40 \mu\text{l O}_2 \text{ (mg DM)}^{-1} \text{ hr}^{-1}$ and 100%, respectively, for 3 hr, while the amount of intracellular polyester rapidly declined. After 3 hr both endogenous respiration and viability started to decline rapidly. In polyester-poor cells this process was initiated immediately after the beginning of starvation. |
| Aerobacter aerogenes                            | aerogenes  | 97.Klebsiella pneumoniae? Enterobacter aerogenes? | Gammaproteobacteria: "Enterobacteriales" | $\mu\text{l O}_2 \text{ (mg N)}^{-1} \text{ hr}^{-1}$            |     | 67   | 11  | 30 | 7.78  |       | Dietrich & Burris 1967                                                            | Bacteria cultured for 2 weeks in an extract from wheat plants; respiration measured for 1 hr after 10 min equilibration                                                                                          | Cells of this organism contain more nitrogen than other bacteria<br>Bacteria "had a lower endogenous [respiration] ... if harvested during exponential growth than after reaching the stationary phase"                                                                                                                                                                                                                        |
| Aerobacter aerogenes                            | aerogenes  | 98.Klebsiella pneumoniae? Enterobacter aerogenes? | Gammaproteobacteria: "Enterobacteriales" | $\mu\text{mol O}_2 \text{ (100 mg DM)}^{-1} \text{ (2 hr)}^{-1}$ |     | 69.3 | 13  | 30 | 9.19  |       | Gronlund & Campbell 1961                                                          | Cells harvested after 20 hr growth                                                                                                                                                                               |                                                                                                                                                                                                                                                                                                                                                                                                                                |
| Klebsiella pneumoniae (M5a1)                    | pneumoniae | 99.Klebsiella pneumoniae                          | Gammaproteobacteria: "Enterobacteriales" | $\mu\text{l O}_2 \text{ (mg DM)}^{-1} \text{ hr}^{-1}$           | MIN | 2    | 3.3 | 30 | 2.33  | [0.4] | Jurtshuk & McQuitty [BM] 1976                                                     | Cells harvested at the late-logarithmic growth phase (two thirds of the maximal growth concentration)                                                                                                            |                                                                                                                                                                                                                                                                                                                                                                                                                                |
| Klebsiella pneumoniae (ATCC 13882)              | pneumoniae | 100.Klebsiella pneumoniae                         | Gammaproteobacteria: "Enterobacteriales" | $\mu\text{l O}_2 \text{ (mg DM)}^{-1} \text{ hr}^{-1}$           |     | 4    | 6.7 | 30 | 4.74  | [0.4] | Jurtshuk & McQuitty [BM] 1976                                                     | Cells harvested at the late-logarithmic growth phase (two thirds of the maximal growth concentration)                                                                                                            |                                                                                                                                                                                                                                                                                                                                                                                                                                |
| Aerobacter aerogenes (NCTC 418)                 | aerogenes  | 101.Klebsiella pneumoniae                         | Gammaproteobacteria: "Enterobacteriales" | $\mu\text{l O}_2 \text{ (mg DM)}^{-1} \text{ hr}^{-1}$           |     | 12   | 20  | 37 | 8.71  | [0.4] | Bishop et al. [BM] 1962                                                           | Respiration measured immediately after harvesting the cells at the end of the logarithmic growth phase                                                                                                           |                                                                                                                                                                                                                                                                                                                                                                                                                                |
| Lactobacillus brevis (12)                       | brevis     | 102.Lactobacillus brevis                          | "Bacilli": "Lactobacillales"             | $\mu\text{l O}_2 \text{ (12 mg DM)}^{-1} \text{ (2 hr)}^{-1}$    | MIN | 2.9  | 0.2 | 30 | 0.14  | [1.6] | Walker 1959 [BM, rods 0.7-1.0x2-4]                                                | Cells (strain 1.2) were grown for 48 hr; endogenous respiration measured for 3 hr (Fig. 3); mean respiration rate for the second and third hour was taken; during the first hour, respiration was 4 times higher | Bacterium originally isolated from New Zealand cheddar cheese<br>Respiration decreases with starvation time                                                                                                                                                                                                                                                                                                                    |
| Lactobacillus casei sbsp. rhamnosus (ATCC 7469) | casei      | 103.Lactobacillus casei                           | "Bacilli": "Lactobacillales"             | $\mu\text{l O}_2 \text{ (mg DM)}^{-1} \text{ hr}^{-1}$           | MIN | 1    | 1.7 | 30 | 1.20  |       | Jurtshuk & McQuitty 1976                                                          | Cells harvested at the late-logarithmic growth phase (two                                                                                                                                                        |                                                                                                                                                                                                                                                                                                                                                                                                                                |



|                                                   |                                 |                                      |                                                                                     |     |     |     |    |       |       |                                                                                                                                                           |                                                                                                                                                                                                                                                                                                   |                                                                                                                                                                                                                      |
|---------------------------------------------------|---------------------------------|--------------------------------------|-------------------------------------------------------------------------------------|-----|-----|-----|----|-------|-------|-----------------------------------------------------------------------------------------------------------------------------------------------------------|---------------------------------------------------------------------------------------------------------------------------------------------------------------------------------------------------------------------------------------------------------------------------------------------------|----------------------------------------------------------------------------------------------------------------------------------------------------------------------------------------------------------------------|
| Streptococcus lactis (strains 8, 9, 32)           | 104.Lactococcus lactis          | “Bacilli”: “Lactobacillales”         | $\mu\text{l O}_2$ (115 mg DM) <sup>-1</sup> (4 hr) <sup>-1</sup>                    | MIN | 170 | 0.6 | 30 | 0.42  | [0.2] | Spendlove et al. 1957 [BM]                                                                                                                                | thirds of the maximal growth concentration)<br>Cells grown for 11 hr; for 7- and 9-hr grown cells respiration was around 400 $\mu\text{l O}_2$ (115 mg DM) <sup>-1</sup> (4 hr) <sup>-1</sup>                                                                                                     | In 11-hr cells respiration decreases in the first 30 min of the 4-hr' measurement, then remains relatively constant; in 7-hr and 9-hr cells respiration first decreases, then starts to increase again after 2-3 hr. |
| Lactococcus ssp. lactis (DSM 20481 <sup>T</sup> ) | 105.Lactococcus lactis          | “Bacilli”: “Lactobacillales”         | nmol O <sub>2</sub> (mg DM) <sup>-1</sup> min <sup>-1</sup>                         |     | <1  | 2.3 | 30 | 1.63  | [0.2] | Bauer et al. 2000 [BM]                                                                                                                                    | Respiration of cells from aerobically and anaerobically glucose-grown cultures                                                                                                                                                                                                                    |                                                                                                                                                                                                                      |
| Lactococcus sp. (TmLO5)                           | 106.Lactococcus sp.             | “Bacilli”: “Lactobacillales”         | nmol O <sub>2</sub> (mg DM) <sup>-1</sup> min <sup>-1</sup>                         | MIN | <1  | 2.3 | 30 | 1.63  | 0.8   | Bauer et al. 2000 [rods, 0.6-1×1.1-3 $\mu\text{m}$ ]                                                                                                      | Respiration of cells from aerobically and anaerobically glucose-grown cultures                                                                                                                                                                                                                    |                                                                                                                                                                                                                      |
| Legionella pneumophila (Knoxville-1, serotype 1)  | 107.Legionella pneumophila      | Gammaproteobacteria: Legionellales   | $\mu\text{l O}_2$ (mg DM) <sup>-1</sup> min <sup>-1</sup>                           | MIN | 0.2 | 20  | 37 | 8.71  | [0.3] | Tesh et al. 1983 [Faulkner & Garduño 2002, rods 0.3-0.5×1.5-3.0 $\mu\text{m}$ , prereplicative phase; Kowalski et al. 1999, 0.3-0.9×2 $\mu\text{m}$ ]     | Bacteria harvested at mid- to late exponential growth phase (15-18 hr growth time) when the mass-specific oxygen consumption is highest (~70 W/kg); washed; “held at 37 C until used”; calibrated for 3 min; respiration measured when “a steady rate of endogenous respiration was established”. |                                                                                                                                                                                                                      |
| Legionella pneumophila (serogroup 1)              | 108.Legionella pneumophila      | Gammaproteobacteria: Legionellales   | $\mu\text{l O}_2$ (400 $\mu\text{g protein}$ ) <sup>-1</sup> (40 min) <sup>-1</sup> |     | 25  | 77  | 37 | 33.52 | [0.3] | Bonach & Snyder 1983 [Faulkner & Garduño 2002, rods 0.3-0.5×1.5-3.0 $\mu\text{m}$ , prereplicative phase; Kowalski et al. 1999, 0.3-0.9×2 $\mu\text{m}$ ] | Cells harvested at mid-log phase, shaken for 30 min, respiration measured for 40 min                                                                                                                                                                                                              |                                                                                                                                                                                                                      |
| Pseudomonas AM1 (NCIB 9133)                       | 109.Methylobacterium extorquens | Alphaproteobacteria: Rhizobiales     | nmol O <sub>2</sub> (mg protein) <sup>-1</sup> min <sup>-1</sup>                    | MIN | 5   | 6   | 30 | 4.24  | [1]   | Keevil & Anthony 1979 [Peel & Quayle 1961, rods 0.8×2.0 $\mu\text{m}$ ]                                                                                   | Cells harvested at the end of logarithmic phase; depending on growth conditions, respiration ranged from 5 to 16 orig. units; the same result obtained by O'Keeffe & Anthony 1978                                                                                                                 |                                                                                                                                                                                                                      |
| Methylomicrobium sp. (AMO 1)                      | 110.Methylomicrobium sp.        | Gammaproteobacteria: Methylococcales | nmol O <sub>2</sub> (mg protein) <sup>-1</sup> min <sup>-1</sup>                    | MIN | 10  | 11  | 30 | 7.78  | 3     | Sorokin et al. 2000 and personal communication                                                                                                            | Cells grown with methane at pH 10<br>Endogenous respira-                                                                                                                                                                                                                                          |                                                                                                                                                                                                                      |

|                                              |                                  |                                      |                                                                  |     |     |     |    |       |        |                                                                    |                                                                                                                                                                                                                                                                    |                                                                                                                                                                                                                                                                                                                |  |
|----------------------------------------------|----------------------------------|--------------------------------------|------------------------------------------------------------------|-----|-----|-----|----|-------|--------|--------------------------------------------------------------------|--------------------------------------------------------------------------------------------------------------------------------------------------------------------------------------------------------------------------------------------------------------------|----------------------------------------------------------------------------------------------------------------------------------------------------------------------------------------------------------------------------------------------------------------------------------------------------------------|--|
|                                              |                                  |                                      |                                                                  |     |     |     |    |       |        |                                                                    | with Dr. D.Yu. Sorokin (15 Nov 2006) (ovoid rods, 1-1.5×2-3 μm)                                                                                                                                                                                                    | tion is usually below 10 nmol O <sub>2</sub> (mg protein) <sup>-1</sup> min <sup>-1</sup> , except in cells grown on acetate and at high pH (10.8-11.5), when it can be 20-50 nmol O <sub>2</sub> (mg protein) <sup>-1</sup> min <sup>-1</sup>                                                                 |  |
| Methylophilus methylotrophus (NCIB 10515)    | 111.Methylophilus methylotrophus | Betaproteobacteria: Methylophiliales | ng-atoms O (mg DM) <sup>-1</sup> min <sup>-1</sup>               | MIN | 1.4 | 1.6 | 40 | 0.57  | [0.15] | Dawson & Jones 1981 [Jenkins et al. 1987, rods 0.3-0.6×0.8-1.5 μm] | Cells harvested from continuous culture and used within 3 hr                                                                                                                                                                                                       | Obligate methylotroph using methanol as the sole source of carbon and energy                                                                                                                                                                                                                                   |  |
| Methylosinus trichosporium OB3b (ATCC 35070) | 112.Methylosinus trichosporium   | Alphaproteobacteria: Rhizobiales     | nmol O <sub>2</sub> (mg protein) <sup>-1</sup> min <sup>-1</sup> | MIN | 38  | 42  | 30 | 29.70 | [1]    | Lontoh et al. 1999 [Reed & Dugan 1978, Fig. 1]                     | Cells harvested in the exponential phase                                                                                                                                                                                                                           | Cell mass estimated from cell linear dimensions as shown in Fig. 1 of Reed & Dugan 1978                                                                                                                                                                                                                        |  |
| Sarcina lutea                                | 113.Micrococcus luteus           | Actinobacteria: Actinomycetales      | μl O <sub>2</sub> (mg DM) <sup>-1</sup> hr <sup>-1</sup>         | MIN | 0.7 | 1.2 | 37 | 0.52  | [1.1]  | Burleigh & Dawes 1967 [BM]                                         | Cells were harvested after 24 hr growth on peptone; starved for 29 hr; viability 96%; respiration fell to "barely measurable" (0.3 μl O <sub>2</sub> (mg DM) <sup>-1</sup> hr <sup>-1</sup> ) when starvation was prolonged to 72 hr with viability falling to 25% | Endogenous respiration decreased during starvation most rapidly in the first 5 hr of starvation (from 21.1 to 0.7 orig. units)                                                                                                                                                                                 |  |
|                                              |                                  |                                      |                                                                  |     |     |     |    |       |        |                                                                    | Bishop et al. 1962: respiration measured immediately after harvesting the cells at the end of the logarithmic growth phase was below detection limit (0 orig. units) (148 μl O <sub>2</sub> (mg DM) <sup>-1</sup> hr <sup>-1</sup> in the presence of lactate)     | Initial endogenous respiration depended on the time of harvesting: mid-exponential (21 hr) — 30 orig. units; onset of the stationary phase (34 hr) — 15.9; 60 hr — 6.3 orig. units; the decline of respiration is correlated with the decline of intracellular contents of free amino acids, carbohydrate etc. |  |
| Sarcina lutea                                | 114.Micrococcus luteus           | Actinobacteria: Actinomycetales      | μl O <sub>2</sub> (mg DM) <sup>-1</sup> hr <sup>-1</sup>         |     | 3.5 | 6   | 35 | 3.00  | [1.1]  | Dawes & Holms 1958 [BM]                                            | Cells harvested after 24 hr growth at 35 C and aerated for 5 hr; respiration 3.5 μl O <sub>2</sub> (mg DM) <sup>-1</sup> hr <sup>-1</sup> = 6 W/kg                                                                                                                 |                                                                                                                                                                                                                                                                                                                |  |
| Micrococcus deikticus                        | lyso-115.Micrococcus luteus      | Actinobacteria: Actinomycetales      | μl O <sub>2</sub> (mg DM) <sup>-1</sup> hr <sup>-1</sup>         |     | 11  | 18  | 37 | 7.83  | [1.1]  | Davis & Bateman 1960 [BM]                                          | Cells harvested after 16.5 hr growth at 37 C; respiration measured for 2 hr                                                                                                                                                                                        |                                                                                                                                                                                                                                                                                                                |  |
| Sarcina flava                                | 116.Micrococcus luteus           | Actinobacteria: Actinomycetales      | μl O <sub>2</sub> (mg DM) <sup>-1</sup> hr <sup>-1</sup>         |     | 9   | 15  | 30 | 10.61 | [1.1]  | Jurtshuk & McQuitty 1976 [BM]                                      | Cells harvested at the late-logarithmic growth phase (two                                                                                                                                                                                                          |                                                                                                                                                                                                                                                                                                                |  |

|                                               |     |                                |                                      |                                                           |     |       |     |    |       |       |                                                                                              |                                                                                                                                                                                                                                                                              |                                                                                                 |
|-----------------------------------------------|-----|--------------------------------|--------------------------------------|-----------------------------------------------------------|-----|-------|-----|----|-------|-------|----------------------------------------------------------------------------------------------|------------------------------------------------------------------------------------------------------------------------------------------------------------------------------------------------------------------------------------------------------------------------------|-------------------------------------------------------------------------------------------------|
| Micrococcus (S9)                              | sp. | 117.Micrococcus sp.            | Actinobacteria: Actinomycetales      | $\mu\text{l O}_2 \text{ (4 mg DM)}^{-1} \text{ min}^{-1}$ | MIN | 0.40  | 10  | 30 | 7.07  |       | Sparnins & Chapman 1976 [BM, genus, spherical cells, diam 0.5-2.0 $\mu\text{m}$ ]            | thirds of the maximal growth concentration); respiration was 16, 9 and 30 $\mu\text{l O}_2 \text{ (mg DM)}^{-1} \text{ hr}^{-1}$ for Micrococcus (Sarcina) luteus, M. (S. flava) luteus and M. (lyso-deikticus) luteus ATCC 4698, respectively (27, 15 and 50 W/kg)          |                                                                                                 |
| Micrococcus                                   | sp. | 118.Micrococcus sp.            | Actinobacteria: Actinomycetales      | $\mu\text{l O}_2 \text{ (mg DM)}^{-1} \text{ hr}^{-1}$    | MIN | 10    | 17  | 30 | 12.02 |       | Cooper et al. 1965 [BM, genus, spherical cells, diam 0.5-2.0 $\mu\text{m}$ ]                 | Cells harvested during the exponential phase                                                                                                                                                                                                                                 | The organism was isolated from soil. Size and classification as for genus Micrococcus Cohn 1872 |
| Moraxella osloensis                           |     | 119.Moraxella osloensis        | Gammaproteobacteria: Pseudomonadales | $\mu\text{l O}_2 \text{ (mg DM)}^{-1} \text{ hr}^{-1}$    | MIN | 8     | 13  | 30 | 9.19  | [2.3] | Jurtshuk & McQuitty 1976 [Baumann et al. 1968, rods 0.9-1.7 $\times$ 1.6-2.7 $\mu\text{m}$ ] | Cells harvested at the late-logarithmic growth phase (two thirds of the maximal growth concentration)                                                                                                                                                                        |                                                                                                 |
| Mycobacterium fortuitum                       |     | 120.Mycobacterium fortuitum    | Actinobacteria: Actinomycetales      | $\mu\text{l O}_2 \text{ (mg DM)}^{-1} \text{ hr}^{-1}$    | MIN | 10    | 17  | 30 | 12.02 |       | Jurtshuk & McQuitty 1976                                                                     | Cells harvested at the late-logarithmic growth phase (two thirds of the maximal growth concentration)                                                                                                                                                                        |                                                                                                 |
| Mycobacterium leprae                          |     | 121.Mycobacterium leprae       | Actinobacteria: Actinomycetales      | $\mu\text{l O}_2 \text{ (mg DM)}^{-1} \text{ hr}^{-1}$    | MIN | 2     | 3.3 | 37 | 1.44  |       | Mori et al. 1985                                                                             | Cells isolated from mice                                                                                                                                                                                                                                                     |                                                                                                 |
| Mycobacterium lepraemurium (Hawaiiian strain) |     | 122.Mycobacterium lepraemurium | Actinobacteria: Actinomycetales      | $\mu\text{l O}_2 \text{ (mg N)}^{-1} \text{ hr}^{-1}$     | MIN | 20-70 | 3.3 | 37 | 1.44  |       | Gray 1952                                                                                    | Culture isolated from infected rats; occasionally, some suspensions respired less than 5 $\mu\text{l O}_2 \text{ (mg N)}^{-1} \text{ hr}^{-1}$                                                                                                                               |                                                                                                 |
| Mycobacterium phlei (72)                      |     | 123.Mycobacterium phlei        | Actinobacteria: Actinomycetales      | $\mu\text{mol O}_2 \text{ (mg N)}^{-1} \text{ hr}^{-1}$   | MIN | 4.8   | 14  | 37 | 6.09  | [0.4] | Tepper [BM] 1968                                                                             | Glucose-grown cells (strain 72) harvested from 5-day culture; respiration calculated assuming N/DM ratio of 0.08 (Tepper 1968); respiration measured for a minimum of 90 min; glycerol-grown cells had 7.3 $\mu\text{mol O}_2 \text{ (mg N)}^{-1} \text{ hr}^{-1}$ = 16 W/kg | N/DM=5.6-6.8% for glycerol-grown cells, 7.8-8.9% for glucose-grown cells                        |

|                                                      |                                |                                   |       |                                                                 |     |           |       |      |       |       |                                                                           |                                                                                                                                                                                                            |                                         |
|------------------------------------------------------|--------------------------------|-----------------------------------|-------|-----------------------------------------------------------------|-----|-----------|-------|------|-------|-------|---------------------------------------------------------------------------|------------------------------------------------------------------------------------------------------------------------------------------------------------------------------------------------------------|-----------------------------------------|
| Mycobacterium phlei                                  | 124.Mycobacterium phlei        | Actinobacteria: Actinomycetales   | Acti- | $\mu\text{l O}_2 \text{ (mg DM)}^{-1} \text{ hr}^{-1}$          |     | 16        | 27    | 30   | 19.09 | [0.4] | Jurtshuk & McQuitty 1976 [BM]                                             | Cells harvested at the late-logarithmic growth phase (two thirds of the maximal growth concentration)                                                                                                      |                                         |
| Mycobacterium smegmatis (607)                        | 125.Mycobacterium smegmatis    | Actinobacteria: Actinomycetales   | Acti- | $\mu\text{l O}_2 \text{ (mg N)}^{-1} \text{ hr}^{-1}$           | MIN | 146       | 24    | 37   | 10.45 |       | Forbes et al. 1962 [BM, genus, rods 0.2-0.6x3.0-3.5 $\mu\text{m}$ ]       | Cells harvested after 22 hr incubation.                                                                                                                                                                    |                                         |
| Mycobacterium stercoris (NCTC 3820)                  | 126.Mycobacterium smegmatis    | Actinobacteria: Actinomycetales   | Acti- | $\mu\text{l O}_2 \text{ (mg DM)}^{-1} \text{ hr}^{-1}$          |     | 11.9      | 20    | 30   | 14.14 |       | Hunter 1953 [BM, genus, rods 0.2-0.6x3.0-3.5 $\mu\text{m}$ ]              | Cells grown for 5-6 days; respiration of M. (butyricum) smegmatis (NCTC 337) and M. smegmatis (NCTC 523) was 13.4 and 15 $\mu\text{l O}_2 \text{ (mg DM)}^{-1} \text{ hr}^{-1}$ , respectively             |                                         |
| Mycobacterium smegmatis                              | 127.Mycobacterium smegmatis    | Actinobacteria: Actinomycetales   | Acti- | $\mu\text{l O}_2 \text{ (mg DM)}^{-1} \text{ hr}^{-1}$          |     | 13        | 22    | 30   | 15.56 |       | Jurtshuk & McQuitty 1976 [BM, genus, rods 0.2-0.6x3.0-3.5 $\mu\text{m}$ ] | Cells harvested at the late-logarithmic growth phase (two thirds of the maximal growth concentration); respiration was 13 $\mu\text{l O}_2 \text{ (mg DM)}^{-1} \text{ hr}^{-1} = 22 \text{ W/kg}$ at 30 C |                                         |
| Mycobacterium tuberculosis var. hominis              | 128.Mycobacterium tuberculosis | Actinobacteria: Actinomycetales   | Acti- | $\mu\text{l O}_2 \text{ (mg DM)}^{-1} \text{ (5 hr)}^{-1}$      | MIN | 6.5       | 2.2   | 37   | 0.96  | [0.2] | Engelhard et al. 1957 [BM, rods 0.2-0.5x2-4 $\mu\text{m}$ ]               | Bacteria grown for 25 to 28 hr in batches; magnetically mixed in buffer solution for 5 hr; stored at -5 C for no more than 12 hr before analysis; respiration measured for 5 hr                            | Human tuberculosis bacteria             |
| Mycobacterium tuberculosis var. hominis (H37Rv, LRv) | 129.Mycobacterium tuberculosis | Actinobacteria: Actinomycetales   | Acti- | $\mu\text{l O}_2 \text{ (mg DM)}^{-1} \text{ hr}^{-1}$          |     | 4.2-5.8   | 7     | 37.8 | 2.9   | [0.2] | Segal & Bloch 1955 [BM, rods 0.2-0.5x2-4 $\mu\text{m}$ ]                  | Various growth conditions                                                                                                                                                                                  |                                         |
| Mycobacterium tuberculosis var. avium                | 130.Mycobacterium tuberculosis | Actinobacteria: Actinomycetales   | Acti- | $\mu\text{l O}_2 \text{ (10 mg WM)}^{-1} \text{ (90 min)}^{-1}$ |     | 100       | 37    | 37   | 16.11 | [0.2] | Minami 1957 [BM, rods 0.2-0.5x2-4 $\mu\text{m}$ ]                         | Cultures 3 days old                                                                                                                                                                                        |                                         |
| Mycobacterium tuberculosis var. hominis (H37Rv)      | 131.Mycobacterium tuberculosis | Actinobacteria: Actinomycetales   | Acti- | $\mu\text{l O}_2 \text{ (mg WM)}^{-1} \text{ (hr)}^{-1}$        |     | 0.46-1.10 | 2.6-6 | 37   | 23.33 | [0.2] | Youmans et al. 1960 [BM, rods 0.2-0.5x2-4 $\mu\text{m}$ ]                 | Various growth conditions. Similar results were obtained later by the same team (Youmans & Youmans 1962a,b)                                                                                                |                                         |
| Myxococcus xanthus (FB)                              | 132.Myxococcus xanthus         | Deltaproteobacteria: Myxococcales |       | $\mu\text{l O}_2 \text{ (15 mg DM)}^{-1} \text{ (75 min)}^{-1}$ | MIN | 7         | 4.6   | 30   | 3.25  | [1]   | Dworkin & Niederpruem 1964 [McVittie et al. 1962, rods,                   | Vegetative cells harvested in the early stationary phase (30 hr); respiration meas-                                                                                                                        | No measurable respiration in microcysts |

|                                 |                              |                                      |                                                              |     |     |     |    |       |        |                                                                                            |                                                                                                                               |                                                                                                                                                                                                                 |
|---------------------------------|------------------------------|--------------------------------------|--------------------------------------------------------------|-----|-----|-----|----|-------|--------|--------------------------------------------------------------------------------------------|-------------------------------------------------------------------------------------------------------------------------------|-----------------------------------------------------------------------------------------------------------------------------------------------------------------------------------------------------------------|
| Neisseria elongata (ATCC 25295) | 133.Neisseria elongata       | Betaproteobacteria: Neisseriales     | $\mu\text{l O}_2 (\text{mg DM})^{-1} \text{hr}^{-1}$         | MIN | 5   | 8.3 | 30 | 5.87  | [0.2]  | 0.5×3-8 $\mu\text{m}$<br>Jurtshuk & McQuitty 1976 [BM, short rods 0.5 $\mu\text{m}$ width] | Incubated for 75 min<br>Cells harvested at the late-logarithmic growth phase (two thirds of the maximal growth concentration) |                                                                                                                                                                                                                 |
| Neisseria flava (ATCC 14221)    | 134.Neisseria flava          | Betaproteobacteria: Neisseriales     | $\mu\text{l O}_2 (\text{mg DM})^{-1} \text{hr}^{-1}$         | MIN | 7   | 12  | 30 | 8.49  | [0.2]  | Jurtshuk & McQuitty 1976 [BM, genus, cocci, diam 0.6-1.0 $\mu\text{m}$ ]                   | Cells harvested at the late-logarithmic growth phase (two thirds of the maximal growth concentration)                         |                                                                                                                                                                                                                 |
| Neisseria gonorrhoeae           | 135.Neisseria gonorrhoeae    | Betaproteobacteria: Neisseriales     | $\text{nmol O}_2 (\text{mg protein})^{-1} \text{min}^{-1}$   | MIN | 0.5 | 0.6 | 37 | 0.26  | [0.2]  | Kenimer & Lapp 1978 [BM, genus, cocci, diam 0.6-1.0 $\mu\text{m}$ ]                        | Cells harvested during early stationary phase after 18-20 hours of incubation; respiration measured for 2-3 min               | Cell mass estimated from linear dimensions given in BM                                                                                                                                                          |
| Neisseria mucosa                | 136.Neisseria mucosa         | Betaproteobacteria: Neisseriales     | $\mu\text{l O}_2 (\text{mg DM})^{-1} \text{hr}^{-1}$         | MIN | 9   | 15  | 30 | 10.61 | [0.2]  | Jurtshuk & McQuitty 1976 [BM, genus, cocci, diam 0.6-1.0 $\mu\text{m}$ ]                   | Cells harvested at the late-logarithmic growth phase (two thirds of the maximal growth concentration)                         |                                                                                                                                                                                                                 |
| Neisseria sicca                 | 137.Neisseria sicca          | Betaproteobacteria: Neisseriales     | $\mu\text{l O}_2 (\text{mg DM})^{-1} \text{hr}^{-1}$         | MIN | 8   | 13  | 30 | 9.19  | [0.2]  | Jurtshuk & McQuitty 1976 [BM, genus, cocci, diam 0.6-1.0 $\mu\text{m}$ ]                   | Cells harvested at the late-logarithmic growth phase (two thirds of the maximal growth concentration)                         |                                                                                                                                                                                                                 |
| Nitrobacter agilis              | 138.Nitrobacter winogradskyi | Alphaproteobacteria: Rhizobiales     | $\mu\text{l O}_2 (\text{mg protein})^{-1} \text{hr}^{-1}$    | MIN | 12  | 10  | 30 | 7.07  | [0.24] | Smith & Hoare 1968 [Tappe et al. 1999, 0.17-0.3 $\mu\text{m}^3$ ]                          | Incubation time 20 hr                                                                                                         | Facultative heterotroph otherwise growing on nitrite, =Nitrobacter winogradskyi (Pan 1971)                                                                                                                      |
| Nitrobacter agilis (ATCC 14123) | 139.Nitrobacter winogradskyi | Alphaproteobacteria: Rhizobiales     | $\text{ng-atoms O} (\text{mg protein})^{-1} \text{min}^{-1}$ |     | 20  | 11  | 25 | 11.00 | [0.24] | Hollocher et al. 1982 [Tappe et al. 1999, 0.17-0.3 $\mu\text{m}^3$ ]                       | Cells grown at 30 C to the late exponential phase, stored for no more than 3 days at 0 C before measurements                  | Protein to dry mass ratios (Protein/DM) are 0.55, 0.47 and 0.44 for autotrophic, autotrophic plus 1mM acetate, and autotrophic plus 5mM acetate, grown cells, respectively.<br>1 mg WM $\approx$ 0.1 mg protein |
| Nitrosomonas europaea           | 140.Nitrosomonas europaea    | Betaproteobacteria: Nitrosomonadales | $\text{ng-atoms O} (\text{mg protein})^{-1} \text{min}^{-1}$ | MIN | 20  | 11  | 25 | 11.00 | [0.6]  | Hollocher et al. 1982 [Tappe et al. 1999, 0.5-0.7 $\mu\text{m}^3$ ]                        | Bacteria grown at 30 C to the late exponential phase, stored for no more than 3 days at 0 C                                   | 1 mg WM $\approx$ 0.1 mg protein                                                                                                                                                                                |
| Nocardia corallina              | 141.Nocardia corallina       | Actinobacteria: Actinomycetales      | $\mu\text{l O}_2 (\text{mg DM})^{-1} \text{hr}^{-1}$         | MIN | 1   | 1.7 | 30 | 1.20  | 2.1    | Robertson & Batt 1973 (rods, 0.8-1.2×2-4 $\mu\text{m}$ )                                   | Cells harvested at the end of growth phase; respiration measured after 45 hours of starvation; viability more than 90%        | Soil bacterium<br><br>Dry mass data (Fig. 1): $4.3 \times 10^9$ cells (90% viable) make up 1.6 mg dry mass: $0.4 \times 10^{-12}$ g dry mass cell $^{-1}$                                                       |

|                         |              |                         |  |                                 |       |                                                      |     |    |     |      |      |       |                                                                                                                                                                                              |                                                                                                                                                                                                     |                                                                                                                                                                                                                                                                                                   |
|-------------------------|--------------|-------------------------|--|---------------------------------|-------|------------------------------------------------------|-----|----|-----|------|------|-------|----------------------------------------------------------------------------------------------------------------------------------------------------------------------------------------------|-----------------------------------------------------------------------------------------------------------------------------------------------------------------------------------------------------|---------------------------------------------------------------------------------------------------------------------------------------------------------------------------------------------------------------------------------------------------------------------------------------------------|
|                         |              |                         |  |                                 |       |                                                      |     |    |     |      |      |       | Respiration rate fell from 10 to 1 $\mu\text{l O}_2$ (mg DM) $^{-1}$ hr $^{-1}$ during the first 45 hr of the total 450 hr' period of starvation                                             | Cell mass estimated from linear dimensions given by Robertson & Batt (1973), 2-4 $\mu\text{m}$ (length) $\times$ 0.8-1.2 $\mu\text{m}$ (diameter), is greater, $2.4 \times 10^{-12}$ g cell $^{-1}$ |                                                                                                                                                                                                                                                                                                   |
|                         |              |                         |  |                                 |       |                                                      |     |    |     |      |      |       | Midwinter & Batt 1953 report 1-12 $\mu\text{l O}_2$ (mg DM) $^{-1}$ hr $^{-1}$ for cells grown on different substrates for 24-96 hr at 30 C; respiration measured for about 3 hr             |                                                                                                                                                                                                     |                                                                                                                                                                                                                                                                                                   |
| Nocardia (A-6)          | corallina    | 142.Nocardia coral-lina |  | Actinobacteria: Actinomycetales | Acti- | $\mu\text{l O}_2$ (4.8 mg DM) $^{-1}$ min $^{-1}$    |     | 40 | 4   | 30.3 | 2.77 | [2.1] | Raymond et al. 1967 [Robertson & Batt 1973, rods, 0.8-1.2 $\times$ 2-4 $\mu\text{m}$ ]                                                                                                       | Cells grown for 72 hr; respiration measured for 220 min.                                                                                                                                            |                                                                                                                                                                                                                                                                                                   |
| Nocardia (ATCC 3308)    | asteroides   | 143.Nocardia far-cinica |  | Actinobacteria: Actinomycetales | Acti- | $\mu\text{l O}_2$ (mg DM) $^{-1}$ hr $^{-1}$         | MIN | 5  | 8.3 | 30   | 5.87 | [0.1] | Jurtshuk & McQuitty 1976 [Takeo & Uesaka 1975, Fig. 1, hyphae diam 0.6 $\mu\text{m}$ mycellium; Kowalski et al. 1999, 1-1.25 $\times$ 3-5 $\mu\text{m}$ airborne]                            | Cells harvested at the late-logarithmic growth phase (two thirds of the maximal growth concentration)                                                                                               |                                                                                                                                                                                                                                                                                                   |
| Nocardia sp. (Z1)       |              | 144.Nocardia sp.        |  | Actinobacteria: Actinomycetales | Acti- | $\mu\text{l O}_2$ (42 mg DM) $^{-1}$ hr $^{-1}$      | MIN | 56 | 2.2 | 30   | 1.56 |       | Watson & Cain 1975 [BM9, genus, hyphae diam 0.5-1.2 $\mu\text{m}$ ]                                                                                                                          | Cells grown for 24 hr                                                                                                                                                                               | Bacterium isolated from soil with by enrichment with pyridine                                                                                                                                                                                                                                     |
| Nocardia sp.            | erythropolis | 145.Nocardia sp.        |  | Actinobacteria: Actinomycetales | Acti- | $\mu\text{l O}_2$ (7.5 mg DM) $^{-1}$ min $^{-1}$    | MIN | 40 | 3   | 30   | 2.12 |       | Cartwright & Cain 1959 [BM9, genus, hyphae diam 0.5-1.2 $\mu\text{m}$ ]                                                                                                                      | Respiration measured for 200 min                                                                                                                                                                    | No change of respiration with time                                                                                                                                                                                                                                                                |
|                         |              |                         |  |                                 |       |                                                      |     |    |     |      |      |       | Cain et al. 1968: Cells harvested after 24-36 hr incubation (Smith et al. 1968); respiration measured for 90 min was 185 $\mu\text{l O}_2$ (14.3 mg DM) $^{-1}$ hr $^{-1}$ = 22 W/kg at 30 C | The organism was originally isolated from soil by enrichment with <i>p</i> -nitrobenzoate (Cain et al. 1958)                                                                                        |                                                                                                                                                                                                                                                                                                   |
| Nonomuraea (ATCC 39727) | sp.          | 146.Nonomuraea sp.      |  | Actinobacteria: Actinomycetales | Acti- | nmol O <sub>2</sub> (mg protein) $^{-1}$ min $^{-1}$ | MIN | 1  | 1   | 25   | 1.00 |       | Palese et al. 2003                                                                                                                                                                           | Respiration of cells in the lag phase (incubated for 15 hr) prior to exponential growth                                                                                                             | Endogenous respiration increases from lag to exponential phase from 1 to 35 nmol O <sub>2</sub> (mg protein) $^{-1}$ min $^{-1}$ , then starts to drop abruptly in the stationary phase (min. value measured after 160 hr incubation was 7 nmol O <sub>2</sub> (mg protein) $^{-1}$ min $^{-1}$ ) |

|                                            |                                    |                                             |                                                            |     |      |     |    |       |        |                                                                                                                                       |                                                                                                                                                                                                                 |                                                                                                      |
|--------------------------------------------|------------------------------------|---------------------------------------------|------------------------------------------------------------|-----|------|-----|----|-------|--------|---------------------------------------------------------------------------------------------------------------------------------------|-----------------------------------------------------------------------------------------------------------------------------------------------------------------------------------------------------------------|------------------------------------------------------------------------------------------------------|
| Micrococcus denitrificans                  | 147.Paracoccus denitrificans       | Alphaproteobacteria: Rhodobacterales        | $\mu\text{l O}_2 (\text{mg DM})^{-1} \text{hr}^{-1}$       | MIN | 5    | 8.3 | 30 | 5.87  | [0.16] | Kornberg & Morris 1965 [BM, spheres (0.5-0.9 $\mu\text{m}$ in diam) or short rods (0.9-1.2 $\mu\text{m}$ long)]<br>Bishop et al. 1962 | Cells harvested during the exponential phase                                                                                                                                                                    | Endogenous reserves of cells were "depleted" by 4 hr aerobic shaking at 30 C in another experiment   |
| Pasteurella pseudotuberculosis (NCTC 1101) | 148.Pasteurella pseudotuberculosis | Gammaproteobacteria: Enterobacteriales      | $\mu\text{l O}_2 (\text{mg DM})^{-1} \text{hr}^{-1}$       | MIN | 7    | 12  | 25 | 12.00 |        |                                                                                                                                       | Respiration measured immediately after harvesting the cells at the end of the logarithmic growth phase                                                                                                          | Max. resp. (in the presence of glucose) was 331 $\mu\text{l O}_2 (\text{mg DM})^{-1} \text{hr}^{-1}$ |
| Pediococcus cerevisiae (ATCC 8081)         | 149.Pediococcus acidilactici       | "Bacilli": "Lactobacillales"                | $\mu\text{l O}_2 (\text{mg DM})^{-1} \text{hr}^{-1}$       | MIN | 2    | 3.3 | 30 | 2.33  | [2.2]  | Jurtshuk & McQuitty 1976 [BM9, genus, spheres 1.0-2.0 $\mu\text{m}$ diam]                                                             | Cells harvested at the late-logarithmic growth phase (two thirds of the maximal growth concentration)                                                                                                           |                                                                                                      |
| Phaeospirillum fulvum (5K, KM MGU 325)     | 150.Phaeospirillum fulvum          | Alphaproteobacteria: Rhodospirillales       | $\text{nmol O}_2 (\text{mg protein})^{-1} \text{min}^{-1}$ | MIN | 25.3 | 28  | 28 | 22.74 | [2]    | Berg et al. 2002 [BM]                                                                                                                 | Bacteria harvested from early exponential cultures grown photoheterotrophically                                                                                                                                 | Purple bacteria                                                                                      |
| Picrophilus oshimae                        | 151.Picrophilus oshimae            | Thermoplasmata (Archaea): Thermoplasmatales | $\text{nmol O}_2 (\text{mg protein})^{-1} \text{min}^{-1}$ | MIN | 22.7 | 25  | 60 | 2.21  | [1]    | Van de Vossenberg et al. 1998 [Schleper et al. 1995, cocci, diam 1-1.5 $\mu\text{m}$ ]                                                | Starvation for several hours                                                                                                                                                                                    | Thermoacidophilic archaeon                                                                           |
| Proteus morganii [=Morganella morganii]    | 152.Proteus morganii               | Gammaproteobacteria: "Enterobacteriales"    | $\mu\text{l O}_2 (\text{mg DM})^{-1} \text{hr}^{-1}$       | MIN | 3    | 5   | 30 | 3.54  | [0.4]  | Jurtshuk & McQuitty 1976 [BM, rods, 0.6-0.7 $\times$ 1-1.7 $\mu\text{m}$ ]                                                            | Cells harvested at the late-logarithmic growth phase (two thirds of the maximal growth concentration)                                                                                                           |                                                                                                      |
| Proteus vulgaris                           | 153.Proteus vulgaris               | Gammaproteobacteria: "Enterobacteriales"    | $\mu\text{l O}_2 (\text{mg DM})^{-1} \text{hr}^{-1}$       | MIN | 3    | 5   | 37 | 2.18  | [0.4]  | Bishop et al. 1962 [BM9, genus, rods 0.4-0.8 $\times$ 1-3 $\mu\text{m}$ ]                                                             | Respiration measured immediately after harvesting the cells (aerobic culture) at the end of the logarithmic growth phase; endogenous respiration of anaerobic culture was below detection limit (0 orig. units) | Max. resp. (in the presence of glucose) was 87 orig. units                                           |
| Proteus vulgaris                           | 154.Proteus vulgaris               | Gammaproteobacteria: "Enterobacteriales"    | $\mu\text{l O}_2 (\text{mg DM})^{-1} \text{hr}^{-1}$       |     | 3    | 5   | 30 | 3.54  | [0.4]  | Jurtshuk & McQuitty 1976 [BM9, genus, rods 0.4-0.8 $\times$ 1-3 $\mu\text{m}$ ]                                                       | Cells harvested at the late-logarithmic growth phase (two thirds of the maximal growth concentration)                                                                                                           |                                                                                                      |
| Pseudomonas aeruginosa                     | 155.Pseudomonas aeruginosa         | Gammaproteobacteria: Pseudomonadales        | $\mu\text{l O}_2 (\text{mg N})^{-1} (75 \text{ min})^{-1}$ | MIN | 50   | 6.7 | 30 | 4.74  | [0.5]  | Rogoff 1962 [Montesinos et al. 1983, Coulter counter; see also datra of Hou et al. 1966, 0.2-0.8 pg]                                  | Cells isolated from soil and closely resembling P. aeruginosa were grown for 18 to 48 hr; respiration was measured for 75 min                                                                                   |                                                                                                      |

|                                     |                            |                                      |                                                                    |      |    |    |       |       |                                                                                                                  |                                                                                                                                                                                                                                                                                                                                                                                                                                                                                                                                                                                                                                                                                                                                                                                                                                                                                                                                                                                                                                                       |                                                                                                                                                                                                                                                                                                                                                                                                                                                                                                                                                                                                                                                                                                                                      |
|-------------------------------------|----------------------------|--------------------------------------|--------------------------------------------------------------------|------|----|----|-------|-------|------------------------------------------------------------------------------------------------------------------|-------------------------------------------------------------------------------------------------------------------------------------------------------------------------------------------------------------------------------------------------------------------------------------------------------------------------------------------------------------------------------------------------------------------------------------------------------------------------------------------------------------------------------------------------------------------------------------------------------------------------------------------------------------------------------------------------------------------------------------------------------------------------------------------------------------------------------------------------------------------------------------------------------------------------------------------------------------------------------------------------------------------------------------------------------|--------------------------------------------------------------------------------------------------------------------------------------------------------------------------------------------------------------------------------------------------------------------------------------------------------------------------------------------------------------------------------------------------------------------------------------------------------------------------------------------------------------------------------------------------------------------------------------------------------------------------------------------------------------------------------------------------------------------------------------|
| Pseudomonas aeruginosa (120Na)      | 156.Pseudomonas aeruginosa | Gammaproteobacteria: Pseudomonadales | $\mu\text{mol O}_2$ (100 mg DM) <sup>-1</sup> (2 hr) <sup>-1</sup> | 55.5 | 10 | 30 | 7.07  | [0.5] | Gronlund & Campbell 1961 [Montesinos et al. 1983, Coulter counter; see also data of Hou et al. 1966, 0.2-0.8 pg] | Cells (strain 120Na) harvested after 20 hr growth; respiration measured for 2 hr; for strain ATCC 9027 respiration was 80 orig. units<br><br>Tomlinson & Campbell 1963: cells (strain 120Na) harvested after 20 hr growth at 30 C; respiration measured for 2 hr; 120 $\mu\text{l O}_2$ (5 mg DM) <sup>-1</sup> (2 hr) <sup>-1</sup> = 20 W/kg<br><br>Gronlund & Campbell 1963: cells (strain ATCC 9027) harvested after 20 hr growth at 30 C; respiration measured for 3 hr; hourly rates decreased from 4.75 to 4.0 to 3.19 $\mu\text{mol O}_2$ (10 mg DM) <sup>-1</sup> hr <sup>-1</sup> , with no loss of viability (min. rate 12 W/kg)<br><br>Gronlund & Campbell 1966: cells (strain ATCC 9027) harvested after 20 hr growth at 30 C; respiration measured for 2 hr; 95 $\mu\text{l O}_2$ (5 mg DM) <sup>-1</sup> (2 hr) <sup>-1</sup> = 16 W/kg<br><br>Warren et al. 1960 report practically the same rate, 2500 $\mu\text{l O}_2$ (100 mg DM) <sup>-1</sup> (2 hr) <sup>-1</sup> = 20 W/kg; the same age of culture (20 hr), strain ATCC 9027 | Hou et al. 1966: Cell size of P. aeruginosa: 4.5×10 <sup>8</sup> viable cells = 29.6 ×10 <sup>-6</sup> g = 17.5 × 10 <sup>-6</sup> g protein, cells harvested after 8 hr growth: 1 cell = 0.06 ×10 <sup>-12</sup> g dry mass = 0.2 ×10 <sup>-12</sup> g wet mass<br><br>For 24-hr phosphorus starved cells, they observed 4.18×10 <sup>8</sup> viable cells = 44.4 ×10 <sup>-6</sup> g = 22.8 × 10 <sup>-6</sup> g protein: 1 cell = 0.35 × 10 <sup>-12</sup> g wet mass<br><br>For refeed cells at 30 hr: 7.68×10 <sup>8</sup> viable cells = 182 ×10 <sup>-6</sup> g = 75.1 × 10 <sup>-6</sup> g protein: 1 cell = 0.8 × 10 <sup>-12</sup> g wet mass<br><br>Protein to DM (Protein/DM) ratio = 0.59, 0.51 and 0.41, respectively. |
| Pseudomonas aeruginosa (ATCC 15442) | 157.Pseudomonas aeruginosa | Gammaproteobacteria: Pseudomonadales | $\mu\text{l O}_2$ (mg DM) <sup>-1</sup> hr <sup>-1</sup>           | 17   | 28 | 30 | 19.80 | [0.5] | Jurtshuk & McQuitty 1976 [Montesinos et al.                                                                      | Cells harvested at the late-logarithmic growth phase (two                                                                                                                                                                                                                                                                                                                                                                                                                                                                                                                                                                                                                                                                                                                                                                                                                                                                                                                                                                                             |                                                                                                                                                                                                                                                                                                                                                                                                                                                                                                                                                                                                                                                                                                                                      |



|                                              |                                |                                         |                                                                  |      |     |    |       |       |                                                                                                                                                                                   |                                                                                                                                                                                                                                                                                                  |                                                                                    |
|----------------------------------------------|--------------------------------|-----------------------------------------|------------------------------------------------------------------|------|-----|----|-------|-------|-----------------------------------------------------------------------------------------------------------------------------------------------------------------------------------|--------------------------------------------------------------------------------------------------------------------------------------------------------------------------------------------------------------------------------------------------------------------------------------------------|------------------------------------------------------------------------------------|
| Pseudomonas (pyo-<br>ceanea) aeruginosa      | 158.Pseudomonas<br>aeruginosa  | Gammaproteobacteria:<br>Pseudomonadales | $\mu\text{l O}_2 \text{ (mg DM)}^{-1} \text{ hr}^{-1}$           | 28   | 47  | 37 | 20.46 | [0.5] | 1983, Coulter counter; see also datra of Hou et al. 1966, 0.2-0.8 pg] Bishop et al. 1962 [Montesinos et al. 1983, Coulter counter; see also datra of Hou et al. 1966, 0.2-0.8 pg] | thirds of the maximal growth concentration)<br><br>Respiration measured immediately after harvesting the cells (aerobic culture) at the end of the logarithmic growth phase; anaerobically grown culture respired at $15 \mu\text{l O}_2 \text{ (mg DM)}^{-1} \text{ hr}^{-1} = 25 \text{ W/kg}$ |                                                                                    |
| Pseudomonas aeru-<br>ginosa (9/93 and 72/92) | 159.Pseudomonas<br>aeruginosa  | Gammaproteobacteria:<br>Pseudomonadales | $\text{nmol O}_2 \text{ (mg DM)}^{-1} \text{ min}^{-1}$          | 23.7 | 53  | 30 | 37.48 | [0.5] | Majtán et al. 1995 [Montesinos et al. 1983, Coulter counter; see also datra of Hou et al. 1966, 0.2-0.8 pg]                                                                       | Cells harvested at the exponential phase; respiration measured for 10 min                                                                                                                                                                                                                        |                                                                                    |
| Pseudomonas fluo-<br>rescens (A.3.12)        | 160.Pseudomonas<br>fluorescens | Gammaproteobacteria:<br>Pseudomonadales | $\mu\text{l O}_2 \text{ (3 mg DM)}^{-1} \text{ hr}^{-1}$         | 8    | 4.4 | 28 | 3.57  | [1]   | Altekar & Rao 1963 [BM, 0.7-0.8x2.0-3.0 $\mu\text{m}$ ; Gunter & Kohn 1956, 0.24 pg DM/cell = 0.8 pg/cell at 70% water content]                                                   | Cells washed after incubation for 24 hr in a growth medium on a shaker; respiration of “resting” cells measured for 4 hr; value for the last hour taken (Fig. 4)                                                                                                                                 | Respiration decreases with time (mean for the 4 hrs was $\approx 8 \text{ W/kg}$ ) |
| Pseudomonas fluo-<br>rescens (A.3.12)        | 161.Pseudomonas<br>fluorescens | Gammaproteobacteria:<br>Pseudomonadales | $\mu\text{l O}_2 \text{ (mg DM)}^{-1} \text{ hr}^{-1}$           | 5.9  | 10  | 26 | 9.33  | [1]   | Gunter & Kohn 1956 [BM, 0.7-0.8x2.0-3.0 $\mu\text{m}$ ; Gunter & Kohn 1956, 0.24 pg DM/cell = 0.8 pg/cell at 70% water content]                                                   | Respiration of washed cell suspensions harvested from 16 to 18-hr yeast agar plates                                                                                                                                                                                                              |                                                                                    |
| Pseudomonas fluo-<br>rescens (KBI)           | 162.Pseudomonas<br>fluorescens | Gammaproteobacteria:<br>Pseudomonadales | $\mu\text{mol (10 mg DM)}^{-1} \text{ hr}^{-1}$                  | 4    | 15  | 30 | 10.61 | [1]   | Hughes 1966 [BM, 0.7-0.8x2.0-3.0 $\mu\text{m}$ ; Gunter & Kohn 1956, 0.24 pg DM/cell = 0.8 pg/cell at 70% water content]                                                          | Cells grown for 22-24 hr at 25 C; respiration measured after equilibration for 30 min at 30 C                                                                                                                                                                                                    |                                                                                    |
| Pseudomonas fluo-<br>rescens (A.3.12)        | 163.Pseudomonas<br>fluorescens | Gammaproteobacteria:<br>Pseudomonadales | $\mu\text{mol O}_2 \text{ (100 mg DM)}^{-1} \text{ (2 hr)}^{-1}$ | 98   | 18  | 30 | 12.73 | [1]   | Gronlund & Campbell 1961 [BM, 0.7-0.8x2.0-3.0 $\mu\text{m}$ ; Gunter & Kohn 1956, 0.24 pg DM/cell = 0.8                                                                           | Cells harvested after 20 hr growth; respiration measured for 2 hr at 30 C<br><br>Tomlinson & Camp-                                                                                                                                                                                               |                                                                                    |

|                                      |                             |                                      |                                                                 |      |    |     |       |      |                                                                                                                                    |                                                                                                |                                                                                                                                                                                                                                                                                                                                                                    |                                                                                                                                                                      |
|--------------------------------------|-----------------------------|--------------------------------------|-----------------------------------------------------------------|------|----|-----|-------|------|------------------------------------------------------------------------------------------------------------------------------------|------------------------------------------------------------------------------------------------|--------------------------------------------------------------------------------------------------------------------------------------------------------------------------------------------------------------------------------------------------------------------------------------------------------------------------------------------------------------------|----------------------------------------------------------------------------------------------------------------------------------------------------------------------|
| Pseudomonas fluorescens (A.3.12)     | 164.Pseudomonas fluorescens | Gammaproteobacteria: Pseudomonadales | $\mu\text{l O}_2 \text{ (mg DM)}^{-1} \text{ hr}^{-1}$          | 20   | 33 | 30  | 23.33 | [1]  | Jacoby 1964 [BM, 0.7-0.8x2.0-3.0 $\mu\text{m}$ ; Gunter & Kohn 1956, 0.24 pg DM/cell = 0.8 pg/cell at 70% water content]           | pg/cell at 70% water content]                                                                  | bell 1963: 190 $\mu\text{l O}_2 \text{ (5 mg DM)}^{-1} \text{ (2 hr)}^{-1} = 32 \text{ W/kg}$ for 20-hr cultures at 30 C                                                                                                                                                                                                                                           |                                                                                                                                                                      |
| Pseudomonas fluorescens (KBI)        | 165.Pseudomonas fluorescens | Gammaproteobacteria: Pseudomonadales | $\mu\text{l O}_2 \text{ (2 mg DM)}^{-1} \text{ (160 min)}^{-1}$ | 110  | 34 | 30  | 24.04 | [1]  | Kornberg 1958 [BM, 0.7-0.8x2.0-3.0 $\mu\text{m}$ ; Gunter & Kohn 1956, 0.24 pg DM/cell = 0.8 pg/cell at 70% water content]         | Cells grown for 10-12 hr, harvested during logarithmic phase; respiration measured for 160 min |                                                                                                                                                                                                                                                                                                                                                                    |                                                                                                                                                                      |
| Pseudomonas fluorescens (ATCC 13525) | 166.Pseudomonas fluorescens | Gammaproteobacteria: Pseudomonadales | $\text{nmol O}_2 \text{ (mg DM)}^{-1} \text{ (min)}^{-1}$       | 45.7 | 60 | 30  | 42.43 | [1]  | Eisenberg et al. 1973 [BM, 0.7-0.8x2.0-3.0 $\mu\text{m}$ ; Gunter & Kohn 1956, 0.24 pg DM/cell = 0.8 pg/cell at 70% water content] | Respiration of washed cells harvested at midlog or early stationary phase                      |                                                                                                                                                                                                                                                                                                                                                                    |                                                                                                                                                                      |
| Pseudomonas formicans                | 167.Pseudomonas formicans   | Gammaproteobacteria: Pseudomonadales | $\mu\text{l O}_2 \text{ (mg DM)}^{-1} \text{ (40 min)}^{-1}$    | MIN  | 4  | 10  | 30    | 7.07 | [7]                                                                                                                                | Sabina & Pivnick 1956 [Crawford 1954, rods 1-2x4-5 $\mu\text{m}$ ]                             | Bacteria grown for 5 days in a mixture of soluble oils; incubated for 24 hr in a nutrient broth; aerated vigorously in nutrient broth for 18 hr; harvested and washed; washed suspension "shaken for 2 to 8 hr at room temperature in an attempt to reduce the endogenous respiration"; respiration measured for 210 min (Fig. 2); value taken for the last 40 min | Bacteria isolated from used emulsifiers of industrial oil, Illinois, USA<br><br>Endogenous respiration decreases with time during 2-4 hr of respiration (Figs. 2, 4) |
| Pseudomonas oleovorans               | 168.Pseudomonas oleovorans  | Gammaproteobacteria: Pseudomonadales | $\mu\text{l O}_2 \text{ (mg DM)}^{-1} \text{ hr}^{-1}$          | MIN  | 2  | 3.3 | 30    | 2.33 | [0.16]                                                                                                                             | Sabina & Pivnick 1956 [Lee & Chandler 1941, almost coccoid, 0.5x0.8 $\mu\text{m}$ ]            | Bacteria grown for 5 days in a mixture of soluble oils; incubated for 24 hr in a nutrient broth; aerated vigorously in nutrient broth for 18 hr; harvested and washed; washed                                                                                                                                                                                      | Bacteria isolated from used emulsifiers of industrial oil, England<br><br>Endogenous respiration decreases with time during 2-4 hr of respiration (Figs. 2, 4)       |

|                                     |                            |                                      |                                                                |       |          |     |       |        |                                                                 |                                                                                                                                                                                    |                                                                                                                                                                                                                                                                                                  |                                                                                                                                                                                                                                                                                                               |
|-------------------------------------|----------------------------|--------------------------------------|----------------------------------------------------------------|-------|----------|-----|-------|--------|-----------------------------------------------------------------|------------------------------------------------------------------------------------------------------------------------------------------------------------------------------------|--------------------------------------------------------------------------------------------------------------------------------------------------------------------------------------------------------------------------------------------------------------------------------------------------|---------------------------------------------------------------------------------------------------------------------------------------------------------------------------------------------------------------------------------------------------------------------------------------------------------------|
| Pseudomonas oleovorans              | 169.Pseudomonas oleovorans | Gammaproteobacteria: Pseudomonadales | nmol O <sub>2</sub> (mg DM) <sup>-1</sup> min <sup>-1</sup>    | 16-19 | 40       | 30  | 28.28 | [0.16] | Peterson 1970 [Lee & Chandler 1941, almost coccoid, 0.5×0.8 μm] | suspension "shaken for 2 to 8 hr at room temperature in an attempt to reduce the endogenous respiration"; respiration measured for 210 min (Fig. 3); value taken for the last hour | Cells harvested in late-log-phase                                                                                                                                                                                                                                                                |                                                                                                                                                                                                                                                                                                               |
| Pseudomonas putida (O1OC)           | 170.Pseudomonas putida     | Gammaproteobacteria: Pseudomonadales | nmol O <sub>2</sub> (25 mg DM) <sup>-1</sup> min <sup>-1</sup> | MIN   | 11       | 1   | 30    | 0.71   | [1.7]                                                           | Chapman & Ribbons 1976 [BM, 0.7-1.1×2.0-4.0 μm]                                                                                                                                    | Succinate-grown cells harvested after 16-20 hr incubation in the late-logarithmic phase; respiration measured for 2 min; respiration of strains O1OC, ORC and O1 varied from 11 to 29 nmol O <sub>2</sub> (25 mg DM) <sup>-1</sup> min <sup>-1</sup> (1-2.6 W/kg) depending on growth substrate. | The organism was isolated from orcinol enrichments<br><br>Respiration measured for 1 hr (strain ORC) was 43 μl (20 mg WM) <sup>-1</sup> hr <sup>-1</sup> (Fig. 3) = 12 W/kg                                                                                                                                   |
| Pseudomonas putida (arvilla (PaM1)) | 171.Pseudomonas putida     | Gammaproteobacteria: Pseudomonadales | μl O <sub>2</sub> (20 mg WM) <sup>-1</sup> hr <sup>-1</sup>    |       | 10       | 2.8 | 30    | 1.98   | [1.7]                                                           | Kunz & Chapman 1981 [BM, 0.7-1.1×2.0-4.0 μm]                                                                                                                                       | P. putida (arvilla) mt-2 cells grown for 24 hr on toluene or 48 hr on pseudocumene; respiration 10 μl O <sub>2</sub> (20 mg WM) <sup>-1</sup> hr <sup>-1</sup> = 2.8 W/kg                                                                                                                        |                                                                                                                                                                                                                                                                                                               |
| Pseudomonas putida (biotype B)      | 172.Pseudomonas putida     | Gammaproteobacteria: Pseudomonadales | μl O <sub>2</sub> (mg DM) <sup>-1</sup> min <sup>-1</sup>      |       | 0.27/6.1 | 4.4 | 30    | 3.11   | [1.7]                                                           | Sebek & Barker 1968 [BM, 0.7-1.1×2.0-4.0 μm]                                                                                                                                       | Cells harvested towards the end of the exponential phase, shaken for 18 hr "to reduce endogenous respiration"                                                                                                                                                                                    |                                                                                                                                                                                                                                                                                                               |
| Pseudomonas putida (TM)             | 173.Pseudomonas putida     | Gammaproteobacteria: Pseudomonadales | μl O <sub>2</sub> (10 mg WM) <sup>-1</sup> min <sup>-1</sup>   |       | 0.25     | 8.3 | 30    | 5.87   | [1.7]                                                           | Donnelly & Dagle 1980 [BM, 0.7-1.1×2.0-4.0 μm]                                                                                                                                     | Cells harvested during exponential growth                                                                                                                                                                                                                                                        | Strain isolated from rotting oak leaves                                                                                                                                                                                                                                                                       |
| Pseudomonas fluorescens-putida      | 174.Pseudomonas putida     | Gammaproteobacteria: Pseudomonadales | μl O <sub>2</sub> (mg DM) <sup>-1</sup> hr <sup>-1</sup>       |       | 11.2     | 19  | 37    | 8.27   | [1.7]                                                           | Chakrabarty & Roy 1964 [BM, 0.7-1.1×2.0-4.0 μm]                                                                                                                                    | Cells grown to the stationary phase (72 hr)                                                                                                                                                                                                                                                      | Respiration decreases from mid-exponential to late-exponential to stationary phase (20.3 → 17.8 → 11.2 μl O <sub>2</sub> (mg DM) <sup>-1</sup> hr <sup>-1</sup> ); in cells harvested at 20 hr (mid-exponential) and starved for 0-4 hr respiration decreases from 27 (0th) to 20 (2nd) to 16.5 (3rd) to 15.6 |





| Strain                               | Accession                  | Species                  | Phylum                                   | Class                                                             | Order | Family | Genus | Species | Strain | Media         | Temperature                                                                                           | Time                                                                                                                                                                                                        | Yield                                                                                                  | Notes |
|--------------------------------------|----------------------------|--------------------------|------------------------------------------|-------------------------------------------------------------------|-------|--------|-------|---------|--------|---------------|-------------------------------------------------------------------------------------------------------|-------------------------------------------------------------------------------------------------------------------------------------------------------------------------------------------------------------|--------------------------------------------------------------------------------------------------------|-------|
| Vibrio costicola (NRCC 37001)        | 197.Salmonella costicola   | Vibrio costicola         | Gammaproteobacteria: "Vibrionales"       | $\mu\text{l O}_2 \text{ (mg DM)}^{-1} \text{ min}^{-1}$           | MIN   | 0.10   | 7     | 25      | 7.00   | [0.4]         | Kushner et al. 1983 [Huang et al. 2000, rods, 0.5x1.5-3.2 $\mu\text{m}$ ]                             | respiration measured in the dark                                                                                                                                                                            | this species                                                                                           |       |
| Salmonella typhimurium (LT2)         | 198.Salmonella typhimurium | Salmonella typhimurium   | Gammaproteobacteria: "Enterobacteriales" | $\mu\text{l O}_2 \text{ (1.36 mg DM)}^{-1} \text{ (10 min)}^{-1}$ | MIN   | 2      | 15    | 37      | 6.53   | [0.66]        | Hoffee & Englesberg 1962 [Montesinos et al. 1983, Coulter counter]                                    | Cells harvested just before the stationary phase; respiration varied from 0.10 to 1.14 $\mu\text{l O}_2 \text{ (mg DM)}^{-1} \text{ min}^{-1}$ (7-80 W/kg) depending on salt concentration in the medium    |                                                                                                        |       |
| Salmonella typhimurium (ATCC 6444)   | 199.Salmonella typhimurium | Salmonella typhimurium   | Gammaproteobacteria: "Enterobacteriales" | $\mu\text{l O}_2 \text{ (mg DM)}^{-1} \text{ hr}^{-1}$            |       | 6      | 10    | 30      | 7.07   | [0.66] [1.35] | Jurtshuk & McQuitty 1976 [Montesinos et al. 1983, Coulter counter] [Kubitschek 1969, Coulter counter] | Cells harvested at the late-logarithmic growth phase (two thirds of the maximal growth concentration)                                                                                                       |                                                                                                        |       |
| Serratia marcescens (D1)             | 200.Serratia marcescens    | Serratia marcescens      | Gammaproteobacteria: "Enterobacteriales" | $\mu\text{l O}_2 \text{ (10 mg DM)}^{-1} \text{ (3.5 hr)}^{-1}$   | MIN   | 75     | 4     | 37      | 1.74   | [0.4]         | Blizzard & Peterson 1962 [BM, 0.5-0.8x0.9-2 $\mu\text{m}$ ]                                           | Bacteria incubated at 37 C for 18-20 hr on a rotary shaker; respiration measured for 3.5 hr; it grows with time                                                                                             | Respiration grows (!) with time                                                                        |       |
| Chromobacter prodigiosum (NCTC 1377) | 201.Serratia marcescens    | Chromobacter prodigiosum | Gammaproteobacteria: "Enterobacteriales" | $\mu\text{l O}_2 \text{ (mg DM)}^{-1} \text{ hr}^{-1}$            |       | 11     | 18    | 37      | 7.83   | [0.4]         | Bishop et al. 1962 [BM, 0.5-0.8x0.9-2 $\mu\text{m}$ ]                                                 | Respiration measured immediately after harvesting the cells at the end of the logarithmic growth phase                                                                                                      | Max. resp. (in the presence of glucose) was 200 $\mu\text{l O}_2 \text{ (mg DM)}^{-1} \text{ hr}^{-1}$ |       |
| Serratia marcescens                  | 202.Serratia marcescens    | Serratia marcescens      | Gammaproteobacteria: "Enterobacteriales" | $\mu\text{l O}_2 \text{ (mg DM)}^{-1} \text{ hr}^{-1}$            |       | 8      | 13    | 30      | 9.19   | [0.4]         | Jurtshuk & McQuitty 1976 [BM, 0.5-0.8x0.9-2 $\mu\text{m}$ ]                                           | Cells harvested at the late-logarithmic growth phase (two thirds of the maximal growth concentration)                                                                                                       |                                                                                                        |       |
| Serratia marcescens (8 UK)           | 203.Serratia marcescens    | Serratia marcescens      | Gammaproteobacteria: "Enterobacteriales" | $\mu\text{l O}_2 \text{ (mg DM)}^{-1} \text{ hr}^{-1}$            |       | 21     | 35    | 30      | 24.75  | [0.4]         | Davis & Bateman 1960 [BM, 0.5-0.8x0.9-2 $\mu\text{m}$ ]                                               | Cells harvested after 16 hr growth                                                                                                                                                                          |                                                                                                        |       |
| Shigella flexneri 3 (1013)           | 204.Shigella flexneri      | Shigella flexneri        | Gammaproteobacteria: "Enterobacteriales" | $\mu\text{l O}_2 \text{ (0.4 mg N)}^{-1} \text{ hr}^{-1}$         | MIN   | 25     | 10    | 37      | 4.35   |               | Erlanson & Ruhl 1956                                                                                  | Bacteria grown for 18 hr at 37 C; washed; stored in a refrigerator (can be stored for 5 days with no loss of activity); cells not older than 4 days were used in the analysis; respiration measured for 2 h | Human dysentery agent                                                                                  |       |
| Sphaerotilus natans (12)             | 205.Sphaerotilus natans    | Sphaerotilus natans      | Betaproteobacteria: Burkholderiales      | $\mu\text{l O}_2 \text{ (mg DM)}^{-1} \text{ hr}^{-1}$            | MIN   | 27     | 45    | 28      | 36.55  | 6.5           | Stokes 1954 [1.2-1.8x3-5 $\mu\text{m}$ ;                                                              | Cells grown for 16 hr at 28 C on a shaker;                                                                                                                                                                  | Originally isolated from contaminated flowing water                                                    |       |

|                                  |                           |                       |                                                               |     |          |     |    |      |                      |                                                                                                                                                                                        |                                                                                                                                                                                                                                                                                                                                                                                                                                         |                                                                                                                                                                                                                           |
|----------------------------------|---------------------------|-----------------------|---------------------------------------------------------------|-----|----------|-----|----|------|----------------------|----------------------------------------------------------------------------------------------------------------------------------------------------------------------------------------|-----------------------------------------------------------------------------------------------------------------------------------------------------------------------------------------------------------------------------------------------------------------------------------------------------------------------------------------------------------------------------------------------------------------------------------------|---------------------------------------------------------------------------------------------------------------------------------------------------------------------------------------------------------------------------|
| Sporosarcina ureae               | 206.Sporosarcina ureae    | “Bacilli”: Bacillales | $\mu\text{l O}_2 \text{ (mg DM)}^{-1} \text{ hr}^{-1}$        | MIN | 7        | 12  | 30 | 8.49 | [3.8]                | Jurtshuk & McQuitty 1976 [BM9, genus, rods, 1-2×2-3 $\mu\text{m}$ ]                                                                                                                    | washed suspensions were aerated for 3-5 hr to reduce endogenous respiration, which is characterized as “rather high” perhaps “due to the large amount of fatty material stored in the cells”                                                                                                                                                                                                                                            | Aeration for more than 5 hr “tended to destroy the oxidizing capacity of the cells”                                                                                                                                       |
| Staphylococcus aureus            | 207.Staphylococcus aureus | “Bacilli”: Bacillales | $7 \mu\text{l O}_2 \text{ (mg DM)}^{-1} \text{ hr}^{-1}$      | MIN | 9.3-15.7 | 16  | 37 | 7    | [0.04-0.17] [[0.27]] | Ramsey 1962 [Watson et al. 1998, diam 0.41 $\mu\text{m}$ for long-starved cells, 0.69 $\mu\text{m}$ for exponential phase cells] [[Montesinos et al. 1983, Coulter counter]]           | Cells harvested at the late-logarithmic growth phase (two thirds of the maximal growth concentration) Cells grown for 12, 24, 48 and 72 hr on agar respired at 14.8, 12.0, 10.0 and 0 $\mu\text{l O}_2 \text{ (mg DM)}^{-1} \text{ hr}^{-1}$ , respectively, at 37 C; depending on the growth medium, endogenous respiration ranged from 9.3 to 15.7 $\mu\text{l O}_2 \text{ (mg DM)}^{-1} \text{ hr}^{-1} = 16\text{-}26 \text{ W/kg}$ |                                                                                                                                                                                                                           |
| Staphylococcus aureus (FDA 209P) | 208.Staphylococcus aureus | “Bacilli”: Bacillales | $\mu\text{l O}_2 \text{ (14 mg DM)}^{-1} \text{ (4 hr)}^{-1}$ |     | 44       | 1.3 | 30 | 0.92 | [0.04-0.17] [[0.27]] | Huber & Schuardt 1970 [Watson et al. 1998, diam 0.41 $\mu\text{m}$ for long-starved cells, 0.69 $\mu\text{m}$ for exponential phase cells] [[Montesinos et al. 1983, Coulter counter]] | Cells grown for 18 hr at 37 C with shake aeration; respiration measured for 4 hr.                                                                                                                                                                                                                                                                                                                                                       |                                                                                                                                                                                                                           |
| Staphylococcus aureus            | 209.Staphylococcus aureus | “Bacilli”: Bacillales | $\mu\text{l O}_2 \text{ (0.1-0.15 mg N)} \text{ hr}^{-1}$     |     | 2        | 2.2 | 37 | 0.96 | [0.04-0.17] [[0.27]] | Yotis & Ekstedt 1959 [Watson et al. 1998, diam 0.41 $\mu\text{m}$ for long-starved cells, 0.69 $\mu\text{m}$ for exponential phase cells] [[Montesinos et al. 1983, Coulter counter]]  | Cells incubated for 16 hr at 37 C; respiration measured for 6 hr; it decreases with time                                                                                                                                                                                                                                                                                                                                                | Respiration decreases with starvation time from 21 $\mu\text{l O}_2 \text{ (0.1-0.15 mg N)} \text{ hr}^{-1}$ in the first hour, 11.5 (second hour), 6.5 (third, fourth hour), 2 (fifth, sixth hour), min. rate = 2.2 W/kg |
| Staphylococcus                   | 210.Staphylococcus        | “Bacilli”: Bacillales | $\mu\text{l O}_2 \text{ (6.02 mg)}$                           |     | 9.73     | 2.7 | 37 | 1.18 | [0.04-               | Bluhm & Ordal                                                                                                                                                                          | Cells grown for 10 hr                                                                                                                                                                                                                                                                                                                                                                                                                   |                                                                                                                                                                                                                           |

|                                                        |                                |                       |                                                         |      |    |    |      |       |  |                         |                                                                                                                                                                                           |                                                                                                                                                                                                                                                                                                                      |                                                                                                                                                       |
|--------------------------------------------------------|--------------------------------|-----------------------|---------------------------------------------------------|------|----|----|------|-------|--|-------------------------|-------------------------------------------------------------------------------------------------------------------------------------------------------------------------------------------|----------------------------------------------------------------------------------------------------------------------------------------------------------------------------------------------------------------------------------------------------------------------------------------------------------------------|-------------------------------------------------------------------------------------------------------------------------------------------------------|
| aureus (MF-31)                                         | aureus                         |                       | $\text{DM}^{-1} \text{hr}^{-1}$                         |      |    |    |      |       |  | 0.17<br>[[0.27]]        | 1969 [Watson et al. 1998, diam 0.41 $\mu\text{m}$ for long-starved cells, 0.69 $\mu\text{m}$ for exponential phase cells] [[Montesinos et al. 1983, Coulter counter]]                     | at 37 C; respiration of heat injured cells is three times lower                                                                                                                                                                                                                                                      |                                                                                                                                                       |
| Staphylococcus aureus (31-r)                           | 211.Staphylococcus aureus      | “Bacilli”: Bacillales | $\mu\text{mol O}_2 \text{ (mg DM)}^{-1} \text{hr}^{-1}$ | 0.19 | 7  | 37 | 3.05 |       |  | [0.04-0.17]<br>[[0.27]] | Krzemiński et al. 1972 [Watson et al. 1998, diam 0.41 $\mu\text{m}$ for long-starved cells, 0.69 $\mu\text{m}$ for exponential phase cells] [[Montesinos et al. 1983, Coulter counter]]   | Cells harvested after 20 hr growth at 37 C and starved for 3 hr; respiration decreases from 0.68 to 0.43 to 0.19 $\mu\text{mol O}_2 \text{ (mg DM)}^{-1} \text{h}^{-1}$ for the 1st, 2nd and 3rd hrs at 37 C, respectively.                                                                                          | Respiration decreases with starvation time; it also depends on growth phase: maximum at approx. 10 hr and then decreases towards the stationary phase |
| Staphylococcus (albus) aureus                          | 212.Staphylococcus aureus      | “Bacilli”: Bacillales | $\mu\text{l O}_2 \text{ (mg DM)}^{-1} \text{hr}^{-1}$   | 3    | 5  | 30 | 3.54 |       |  | [0.04-0.17]<br>[[0.27]] | Jurtshuk & McQuitty 1976 [Watson et al. 1998, diam 0.41 $\mu\text{m}$ for long-starved cells, 0.69 $\mu\text{m}$ for exponential phase cells] [[Montesinos et al. 1983, Coulter counter]] | Cells harvested at the late-logarithmic growth phase (two thirds of the maximal growth concentration); respiration was 3, 4 and 5 $\mu\text{l O}_2 \text{ (mg DM)}^{-1} \text{hr}^{-1}$ for strains S. (albus) aureus, S. aureus (University of Houston) and S. aureus ATCC 6538, respectively (5-8.3 W/kg), at 30 C |                                                                                                                                                       |
| Staphylococcus epidermidis (AT2)                       | 213.Staphylococcus epidermidis | “Bacilli”: Bacillales | $\mu\text{l O}_2 \text{ (mg DM)}^{-1} \text{hr}^{-1}$   | MIN  | 16 | 27 | 30   | 19.09 |  | [0.5]                   | Jacobs & Conti 1965 [BM]                                                                                                                                                                  | Cells grown for 8 hr at 37 C harvested at the end of the log phase                                                                                                                                                                                                                                                   | Cell mass estimated from linear dimensions given in BM                                                                                                |
| Staphylococcus albus (Micrococcus pyogenes var. albus) | 214.Staphylococcus simulans    | “Bacilli”: Bacillales | $\mu\text{l O}_2 \text{ (mg DM)}^{-1} \text{hr}^{-1}$   | MIN  | 6  | 10 | 37   | 4.35  |  |                         | Bishop et al. 1962                                                                                                                                                                        | Respiration measured immediately after harvesting the cells (aerobic culture) at the end of the logarithmic growth phase; endogenous respiration of anaerobic culture was 4 orig. units                                                                                                                              | Max. resp. (in the presence of lactate) was 111 orig. units                                                                                           |
| Gaffkya tetragena (ATCC 10875)                         | 215.Staphylococcus sp.         | “Bacilli”: Bacillales | $\mu\text{l O}_2 \text{ (mg DM)}^{-1} \text{hr}^{-1}$   | MIN  | 10 | 17 | 30   | 12.02 |  |                         | Jurtshuk & McQuitty 1976                                                                                                                                                                  | Cells harvested at the late-logarithmic growth phase (two thirds of the maximal growth concentration); strain ATCC 10875                                                                                                                                                                                             |                                                                                                                                                       |



|                                      |        |                                  |                 |                   |                                                                |     |     |     |    |       |       |                                                                            |                                                                                                              |                                                                                                                                                                                                                                                                                                                                                                                                                                                                                      |
|--------------------------------------|--------|----------------------------------|-----------------|-------------------|----------------------------------------------------------------|-----|-----|-----|----|-------|-------|----------------------------------------------------------------------------|--------------------------------------------------------------------------------------------------------------|--------------------------------------------------------------------------------------------------------------------------------------------------------------------------------------------------------------------------------------------------------------------------------------------------------------------------------------------------------------------------------------------------------------------------------------------------------------------------------------|
| Streptococcus mastitidis (70b)       | mas-   | 216.Streptococcus agalactiae     | “Bacilli”:      | “Lactobacillales” | $\mu\text{l O}_2$ (mg N) <sup>-1</sup> (120 min) <sup>-1</sup> | MIN | 10  | 1.7 | 37 | 0.74  | [0.3] | Greisen & Gun-salus 1944 [BM]                                              | respired at 14 $\mu\text{l O}_2$ (mg DM) <sup>-1</sup> hr <sup>-1</sup> = 23 W/kg<br>Cells grown for 12 hr   | N/DM $\approx$ 0.1                                                                                                                                                                                                                                                                                                                                                                                                                                                                   |
| Streptococcus agalactiae             | aga-   | 217.Streptococcus agalactiae     | “Bacilli”:      | “Lactobacillales” | $\mu\text{l O}_2$ (mg DM) <sup>-1</sup> hr <sup>-1</sup>       |     | 5   | 8.3 | 37 | 3.61  | [0.3] | Mickelson 1961 [BM]                                                        | Cells harvested after 10-15 hr incubation; respiration measured for 5 hr                                     |                                                                                                                                                                                                                                                                                                                                                                                                                                                                                      |
| Streptococcus pneumoniae (ATCC 6360) |        | 218.Streptococcus pneumoniae     | “Bacilli”:      | “Lactobacillales” | $\mu\text{l O}_2$ (mg DM) <sup>-1</sup> hr <sup>-1</sup>       | MIN | 1   | 1.7 | 30 | 1.20  | [0.4] | Jurtshuk & McQuitty 1976 [Kowalski et al. 1999, diam 0.8-1 $\mu\text{m}$ ] | Cells harvested at the late-logarithmic growth phase (two thirds of the maximal growth concentration)        |                                                                                                                                                                                                                                                                                                                                                                                                                                                                                      |
| Streptococcus pyogenes (ATCC 10389)  | py-    | 219.Streptococcus pyogenes       | “Bacilli”:      | “Lactobacillales” | $\mu\text{l O}_2$ (mg DM) <sup>-1</sup> hr <sup>-1</sup>       | MIN | 2   | 3.3 | 30 | 2.33  | [0.2] | Jurtshuk & McQuitty 1976 [Kowalski et al. 1999, diam 0.6-1 $\mu\text{m}$ ] | Cells harvested at the late-logarithmic growth phase (two thirds of the maximal growth concentration)        |                                                                                                                                                                                                                                                                                                                                                                                                                                                                                      |
| Streptomyces coelicolor              | coeli- | 220.Streptomyces coelicolor      | Actinobacteria: | Actinomycetales   | $\mu\text{l O}_2$ (mg DM) <sup>-1</sup> hr <sup>-1</sup>       | MIN | 24  | 40  | 30 | 28.28 |       | Niederpruem & Hackett 1961                                                 | Respiration of mycelium                                                                                      |                                                                                                                                                                                                                                                                                                                                                                                                                                                                                      |
| Streptomyces fradiae (ATCC 11903)    | fradi- | 221.Streptomyces fradiae         | Actinobacteria: | Actinomycetales   | $\mu\text{l O}_2$ (mg DM) <sup>-1</sup> hr <sup>-1</sup>       | MIN | 13  | 22  | 30 | 15.56 |       | Niederpruem & Hackett 1961                                                 | Respiration of mycelium                                                                                      |                                                                                                                                                                                                                                                                                                                                                                                                                                                                                      |
| Streptomyces griseus (3475 Waksman)  | grise- | 222.Streptomyces griseus         | Actinobacteria: | Actinomycetales   | $\mu\text{l O}_2$ (mg N) <sup>-1</sup> hr <sup>-1</sup>        | MIN | 105 | 18  | 30 | 12.73 |       | Gilmour et al. 1955                                                        | Cells grown for 24 hr                                                                                        |                                                                                                                                                                                                                                                                                                                                                                                                                                                                                      |
| Streptomyces griseus (ATCC 10137)    | grise- | 223.Streptomyces griseus         | Actinobacteria: | Actinomycetales   | $\mu\text{l O}_2$ (mg DM) <sup>-1</sup> hr <sup>-1</sup>       |     | 12  | 20  | 30 | 14.14 |       | Jurtshuk & McQuitty 1976                                                   | Cells harvested at the late-logarithmic growth phase (two thirds of the maximal growth concentration)        |                                                                                                                                                                                                                                                                                                                                                                                                                                                                                      |
| Actinomyces longispororuber          | longi- | 224.Streptomyces longispororuber | Actinobacteria: | Actinomycetales   | $\mu\text{l O}_2$ (mg DM) <sup>-1</sup> hr <sup>-1</sup>       | MIN | 2   | 3.3 | 30 | 2.33  |       | Feofilova et al. 1966                                                      | Respiration of 24-hr-old mycelium                                                                            | Endogenous respiration was minimal (around 2 $\mu\text{l O}_2$ (mg DM) <sup>-1</sup> hr <sup>-1</sup> ) in the beginning of growth before the exponential phase (lag phase); at maximal growth rate it increased up to 14 $\mu\text{l O}_2$ (mg DM) <sup>-1</sup> hr <sup>-1</sup> (48 hr) and then started to decline gradually to 7-11 $\mu\text{l O}_2$ (mg DM) <sup>-1</sup> hr <sup>-1</sup> at 72 hr and 4-8 $\mu\text{l O}_2$ (mg DM) <sup>-1</sup> hr <sup>-1</sup> at 96 hr |
| Streptomyces olivaceus (NRRL B-1125) | oliva- | 225.Streptomyces olivaceus       | Actinobacteria: | Actinomycetales   | $\mu\text{mol O}_2$ (mg N) <sup>-1</sup> hr <sup>-1</sup>      | MIN | 54  | 9   | 37 | 3.92  |       | Maitra & Roy 1961                                                          | Cells harvested at the end of growth at 24 hr; respiration measured for 60 min; pH 5.5; at pH 7.2 endogenous |                                                                                                                                                                                                                                                                                                                                                                                                                                                                                      |

|                                                        |                                 |                                                     |                                                                     |     |      |     |    |      |        |                                                                           |                                                                                                                                                                                                                                                                                                 |                                                                                                                                                                                 |
|--------------------------------------------------------|---------------------------------|-----------------------------------------------------|---------------------------------------------------------------------|-----|------|-----|----|------|--------|---------------------------------------------------------------------------|-------------------------------------------------------------------------------------------------------------------------------------------------------------------------------------------------------------------------------------------------------------------------------------------------|---------------------------------------------------------------------------------------------------------------------------------------------------------------------------------|
| Sulfolobus acidocalcadareus                            | 226.Sulfolobus acidocalcadareus | Archaea: Thermoprotei (Crenarchaeota): Sulfolobales | nmol O <sub>2</sub> (mg protein) <sup>-1</sup> min <sup>-1</sup>    | MIN | 13.5 | 15  | 60 | 1.33 | [0.4]  | Schäfer 1996 [Takayanagi et al. 1996, lobed cells, diam 0.8-1.0 µm]       | respiration was 201.1 orig. units<br>Steady-state respiration on endogenous substrate                                                                                                                                                                                                           |                                                                                                                                                                                 |
| Contagious equine metritis bacterium (E-CMO)           | 227.Taylorella equigenitalis    | Betaproteobacteria: Burkholderiales                 | pmol O <sub>2</sub> (mg protein) <sup>-1</sup> min <sup>-1</sup>    | MIN | 82   | 0.1 | 30 | 0.07 | [0.4]  | Lindmark et al. 1982 [BM9, genus, 0.7×0.7-1.8 µm]                         | Cells (English E-CMO strain) harvested from late log phase after 24 hr                                                                                                                                                                                                                          | Contagious equine metritis bacterium                                                                                                                                            |
| Ferrobacillus ferrooxidans (Thiobacillus ferrooxidans) | 228.Thiobacillus ferrooxidans   | Betaproteobacteria: Hydrogenophilales               | µmol O <sub>2</sub> (5.6 mg protein) <sup>-1</sup> hr <sup>-1</sup> | MIN | 0.12 | 0.5 | 25 | 0.50 | [0.25] | Silver 1970 [Kelly & Wood 2000, rods 0.4×2.0 µm]                          | respiration of cells during 60 min of substrate deprivation                                                                                                                                                                                                                                     |                                                                                                                                                                                 |
| Thiobacillus intermedius                               | 229.Thiobacillus intermedius    | Betaproteobacteria: Hydrogenophilales               | µmol O <sub>2</sub> (mg protein) <sup>-1</sup> hr <sup>-1</sup>     | MIN | 0.6  | 11  | 30 | 7.78 | [0.4]  | London & Rittenberg 1966 [BM9, genus, 0.5-1.0-4.0 µm]                     | Cells were grown in the presence of glucose to the stationary phase; respiration of cells grown without glucose was "nil"                                                                                                                                                                       | Facultative autotroph oxidizing thiosulfate                                                                                                                                     |
| Thiobacillus thiooxidans                               | 230.Thiobacillus thiooxidans    | Betaproteobacteria: Hydrogenophilales               | µl O <sub>2</sub> (mg N) <sup>-1</sup> hr <sup>-1</sup>             | MIN | 4-10 | 1.5 | 28 | 1.22 | [0.25] | Vogler 1942b [Kelly & Wood 2000, rods 0.4×2.0 µm]                         | young cultures (as cited by Newburgh 1954)<br>Vogler 1942a: late cultures respire at 10-40 µl O <sub>2</sub> (mg N) <sup>-1</sup> hr <sup>-1</sup>                                                                                                                                              | Autotroph growing on sulfur; in the presence of sulfur respiration increases by 20-100 times                                                                                    |
| Thiocapsa roseopersicina (M1)                          | 231.Thiocapsa roseopersicina    | Gammaproteobacteria: Chromatiales                   | nmol O <sub>2</sub> (mg protein) <sup>-1</sup> min <sup>-1</sup>    | MIN | 5.0  | 5.6 | 30 | 3.96 | [1]    | Overmann & Pfennig 1992 [Montesinos et al. 1983, Coulter counter]         | Respiration of cells without microscopically visible sulfure globules at oxygen concentrations of 11-67 µM; respiration rates of phototrophically (anaerobically) and chemotrophically (microaerobically) grown cells do not differ; the species is capable of chemotrophic growth in the dark. | Purple sulfur bacteria<br><br>Endogenous respiration of cells with visible sulfur globules is higher, up to 15 nmol O <sub>2</sub> (mg protein) <sup>-1</sup> min <sup>-1</sup> |
| Thiocystis violacea (2711)                             | 232.Thiocystis violacea         | Gammaproteobacteria: Chromatiales                   | nmol O <sub>2</sub> (mg protein) <sup>-1</sup> min <sup>-1</sup>    | MIN | 2.2  | 2.5 | 30 | 1.77 | [11]   | Overmann & Pfennig 1992 [BM9, genus, spherical or ovoid, 2.5-3.0 µm diam] | Respiration of cells without microscopically visible sulfure globules at oxygen concentrations of 11-67 µM; respiration rates of phototrophically (anaerobically) and chemotrophically (microaerobically) grown cells do not                                                                    | Purple sulfur bacteria<br><br>Endogenous respiration of cells with visible sulfur globules is higher, up to 30 orig. units                                                      |

|                                     |                                  |                                      |                                                                  |     |       |     |    |       |       |                                                                                                                                     |                                                                                                                                                                                                                                                                                                                                                                       |                                                                                                                                                                                                                |
|-------------------------------------|----------------------------------|--------------------------------------|------------------------------------------------------------------|-----|-------|-----|----|-------|-------|-------------------------------------------------------------------------------------------------------------------------------------|-----------------------------------------------------------------------------------------------------------------------------------------------------------------------------------------------------------------------------------------------------------------------------------------------------------------------------------------------------------------------|----------------------------------------------------------------------------------------------------------------------------------------------------------------------------------------------------------------|
| Thiorhodovibrio winogradskyi (SSP1) | 233.Thiorhodovibrio winogradskyi | Gammaproteobacteria: Chromatiales    | nmol O <sub>2</sub> (mg protein) <sup>-1</sup> min <sup>-1</sup> | MIN | 5.9   | 6.6 | 30 | 4.67  |       | Overmann & Pfennig 1992                                                                                                             | differ; the species is capable of chemotrophic growth in the dark.<br>Respiration of cells without microscopically visible sulfure globules at oxygen concentrations of 11-67 μM; respiration rates of phototrophically (anaerobically) and chemotrophically (microaerobically) grown cells do not differ; the species is capable of chemotrophic growth in the dark. | Purple sulfur bacteria isolated from the littoral sediment of meromictic Mahoney Lake (British Columbia, Canada)<br><br>Maximum respiration in the presence of substrate (H <sub>2</sub> S) is 264 orig. units |
| Pseudomonas butanovora (ATCC 43655) | 234.Unidentified bacterium       | Gammaproteobacteria: Pseudomonadales | nmol O <sub>2</sub> (mg protein) <sup>-1</sup> min <sup>-1</sup> | MIN | 10-25 | 11  | 30 | 7.78  | [0.6] | Vangnai et al. 2002 and personal communication with Dr. Luis A. Sayavedra-Soto (7 Nov 2006) [BM, species, rods, 0.6-0.8×1.1-2.4 μm] | Bacteria grown to the stationary phase (35-40 hr); kept at 25 C for at least 1 hr to lower endogenous respiration<br><br>With a cell suspension kept at room temperature, the cells would show less endogenous respiration as time passes, down to 1-5 nmol O <sub>2</sub> (mg protein) <sup>-1</sup> min <sup>-1</sup>                                               | Classification made for the Pseudomonas genus as described at www.bacterio.cict.fr. There is no such species at www.bacterio.cict.fr; strain ATCC 43655 is an "unidentified bacterium"                         |
| Unknown sp. (A-50)                  | 235.Unknown                      | Unknown                              | μl O <sub>2</sub> (16 mg DM) <sup>-1</sup> min <sup>-1</sup>     | MIN | 32    | 6.7 | 30 | 4.74  |       | Trudinger 1967                                                                                                                      | Cells grown for 16 hr at 28 C; respiration measured for 30 min                                                                                                                                                                                                                                                                                                        | "Where necessary to reduce endogenous respiration, the bacteria were shaken at 30 C for 1 to 2 hr"                                                                                                             |
| Unknown sp. (C-3)                   | 236.Unknown                      | Unknown                              | μl O <sub>2</sub> (3.1 mg DM) <sup>-1</sup> min <sup>-1</sup>    | MIN | 28    | 30  | 30 | 21.21 |       | Trudinger 1967                                                                                                                      | Cells grown for 16 hr at 28 C; respiration measured for 30 min                                                                                                                                                                                                                                                                                                        | "Where necessary to reduce endogenous respiration, the bacteria were shaken at 30 C for 1 to 2 hr"                                                                                                             |
| Achromobacter hartlebii (NCIB 8129) | 237.Unnamed rhizobiaceae         | Alphaproteobacteria: Rhizobiales     | μl O <sub>2</sub> (mg DM) <sup>-1</sup> hr <sup>-1</sup>         | MIN | 25    | 42  | 25 | 42.00 |       | Bishop et al. 1962                                                                                                                  | Respiration measured immediately after harvesting the cells at                                                                                                                                                                                                                                                                                                        | The organism was isolated from percolation units containing garden soil and elemental sulfur.<br>Max. resp. (in the presence of lactate) was 220 μl O <sub>2</sub> (mg DM) <sup>-1</sup> hr <sup>-1</sup>      |

|                                                             |                              |                                        |                                                        |     |        |      |    |       |        |                                                                                                                                                                                                 |                                                                                                                                                                          |                                                                                                                                                                                                                                                                                                                                                      |
|-------------------------------------------------------------|------------------------------|----------------------------------------|--------------------------------------------------------|-----|--------|------|----|-------|--------|-------------------------------------------------------------------------------------------------------------------------------------------------------------------------------------------------|--------------------------------------------------------------------------------------------------------------------------------------------------------------------------|------------------------------------------------------------------------------------------------------------------------------------------------------------------------------------------------------------------------------------------------------------------------------------------------------------------------------------------------------|
| Vibrio parahaemolyticus (biotype alginolyticus 156-70)      | 238.Vibrio alginolyticus     | Gammaproteobacteria: "Vibrionales"     | $\mu\text{l O}_2 \text{ (mg DM)}^{-1} \text{ hr}^{-1}$ | MIN | 2      | 3.3  | 30 | 2.33  | [0.6]  | Jurtshuk & McQuitty 1976[BM9, genus, rods 0.5-0.8×1.4-2.6 $\mu\text{m}$ ]                                                                                                                       | the end of the logarithmic growth phase<br>Cells harvested at the late-logarithmic growth phase (two thirds of the maximal growth concentration)                         |                                                                                                                                                                                                                                                                                                                                                      |
| Vibrio fischeri (MAC 401)                                   | 239.Vibrio fischeri          | Gammaproteobacteria: "Vibrionales"     | $\text{n atoms O (mg DM)}^{-1} \text{ min}^{-1}$       | MIN | 20     | 22   | 20 | 31.11 | [0.6]  | Droniuk et al. 1987 [Allen & Baumann 1971, Fig. 16, 0.7×1.5 $\mu\text{m}$ ]                                                                                                                     | Respiration at 100 mM $\text{Na}^+$                                                                                                                                      | Marine bacterium                                                                                                                                                                                                                                                                                                                                     |
| Vibrio (metschnikovii) cholerae biotype proteus (ATCC 7708) | 240.Vibrio metschnikovii     | Gammaproteobacteria: "Vibrionales"     | $\mu\text{l O}_2 \text{ (mg DM)}^{-1} \text{ hr}^{-1}$ | MIN | 2      | 3.3  | 30 | 2.33  | [0.6]  | Jurtshuk & McQuitty 1976[BM9, genus, rods 0.5-0.8×1.4-2.6 $\mu\text{m}$ ]                                                                                                                       | Cells harvested at the late-logarithmic growth phase (two thirds of the maximal growth concentration); respiration 1 orig. unit both studied strains, FC1011 and SAK3    |                                                                                                                                                                                                                                                                                                                                                      |
| Vibrio parahaemolyticus (FC1011, SAK3)                      | 241.Vibrio parahaemolyticus  | Gammaproteobacteria: "Vibrionales"     | $\mu\text{l O}_2 \text{ (mg DM)}^{-1} \text{ hr}^{-1}$ | MIN | 1      | 1.7  | 30 | 1.20  | [0.6]  | Jurtshuk & McQuitty 1976 [BM9, genus, rods 0.5-0.8×1.4-2.6 $\mu\text{m}$ ]                                                                                                                      | Cells harvested at the late-logarithmic growth phase (two thirds of the maximal growth concentration); respiration 1 orig. unit both studied strains, FC1011 and SAK3    |                                                                                                                                                                                                                                                                                                                                                      |
| Vibrio sp. (Ant-300)                                        | 242.Vibrio sp.               | Gammaproteobacteria: "Vibrionales"     | % cellular carbon $\text{hr}^{-1}$                     | MIN | 0.0071 | 0.11 | 5  | 0.44  | 0.14   | Novitsky & Morita 1977 [Novitsky & Morita 1976, Figs. 3b,c, cells starved for several weeks, cocci, diam 0.6-0.7 $\mu\text{m}$ ; unstarved cells, rods, 1×2-4 $\mu\text{m} = 2 \mu\text{m}^3$ ] | Stable respiration of cells starved for several weeks; viability 50-100% judged by plate counts; during the first week of starvation, respiration is reduced by over 99% | Cell size estimated from linear dimensions of starved cells as shown in Fig. 3b of Novitsky & Morita 1976<br><br>During starvation, cells first increase in numbers at the expense of internal genetic material (nuclear bodies); as testified by Amy and Morita 1983 for 16 other marine bacterial isolates, this property of Ant-300 is not unique |
| Vitreoscilla stercoraria (ATCC 15218)                       | 243.Vitreoscilla stercoraria | Betaproteobacteria: Neisseriales       | $\mu\text{l O}_2 \text{ (mg DM)}^{-1} \text{ hr}^{-1}$ | MIN | 21     | 35   | 30 | 24.75 |        | Jurtshuk & McQuitty 1976 [BM9, genus, filaments 1-3 $\mu\text{m}$ diam]                                                                                                                         | Cells harvested at the late-logarithmic growth phase (two thirds of the maximal growth concentration)                                                                    |                                                                                                                                                                                                                                                                                                                                                      |
| Xanthomonas phaseoli (ATCC 9563)                            | 244.Xanthomonas axonopodis   | Gammaproteobacteria: Xanthomonadales   | $\mu\text{l O}_2 \text{ (mg DM)}^{-1} \text{ hr}^{-1}$ | MIN | 22     | 37   | 30 | 26.16 | [0.25] | Jurtshuk & McQuitty 1976 [BM9, genus, rods 0.4-0.7×0.7-1.8 $\mu\text{m}$ ]                                                                                                                      | Cells harvested at the late-logarithmic growth phase (two thirds of the maximal growth concentration)                                                                    |                                                                                                                                                                                                                                                                                                                                                      |
| Pasteurella pestis (virulent Alexander strain)              | 245.Yersinia pestis          | Gammaproteobacteria: Enterobacteriales | $\mu\text{l O}_2 \text{ (mg N)}^{-1} \text{ hr}^{-1}$  | MIN | 29     | 4.8  | 28 | 3.90  | [0.55] | Wessman & Miller 1966 [Kowalski et al.                                                                                                                                                          | Cells (virulent Alexander strain) harvested after 24 to 30 hr                                                                                                            | Respiration decreased by approx. 1.5-fold during the first 1-2 hr of starvation and then stabilized for 72 hr                                                                                                                                                                                                                                        |

1999, 0.5-1×1-2 growth; stable respira-  
μm] tion after 1.5 hr of  
starvation

---

Notes on additional data not included into Table **S1a**:

- 1) *Listeria monocytogenes* (Friedman & Alm 1962) resting cells from cultures grown for 16 hr had no measurable endogenous respiration. The lowest reported values were 17.7 and 8.1  $\mu\text{l O}_2 (\text{mg N})^{-1} \text{hr}^{-1}$  for growth in the presence of pyruvate. The same result was obtained by Welch et al. 1979.
- 2) Data needing verification (can be unrealistic): Gaudy et al. 1963, *E.coli* 500 mg DM/l consumed 10 mg  $\text{O}_2$  in 7 hr (Fig. 3) = 0.003 W/kg at 25 C.
- 3) Goldshmidt & Wiss 1966: "Since the high endogenous respiration of 24-hr *Azotobacter* cultures can be reduced markedly by aerating in saline, washed vegetative cells were shaken for 4 hr before exposure to the EDTA-Tris system."
- 4) *Neisseria meningitidis* (Yu & deVoe 1980): washed whole cells were devoid of detectable endogenous respiration; Mallavia & Weiss 1970 obtained the same result (typical rates in the presence of substrates were about 5  $\mu\text{mol O}_2 (\text{mg protein}) \text{hr}^{-1} = 93 \text{ W/kg}$ )
- 5) Data needing verification (can be unrealistic): Mårdén et al. 1985 studied the decline of endogenous respiration of marine bacteria during several days' starvation and observed values of the order of  $0.5 \times 10^{-10} \text{ mg O}_2 (\mu\text{m}^3)^{-1} \text{hr}^{-1} \sim 200 \text{ W/kg}$ . Since this value is in the upper range of respiration values in the presences of substrates (!) (Makarieva et al. 2005), there should be some error in the reported respiration units. Moreover, in the inlet to Fig. 2 showing respiration rate per biosurface the units are again similar ( $\mu\text{m}^{-3}$ ) instead of ( $\mu\text{m}^{-2}$ ) again indicating an inconsistency. Finally, Morton et al. 1994 characterize these rates as "low but detectable", which could hardly be plausible if they were indeed in the vicinity of several hundred W/kg. In the related work by Kjelleberg et al. 1982 it is stated that after five days of starvation a marine *Vibrio* respired at a rate of not less than 9 ng atoms  $\text{O}_2 (10^9 \text{ viable cells})^{-1} \text{min}^{-1}$  and cell volume was 0.4  $\mu\text{m}^3$ . This gives a mass-specific rate of 90 W/kg. Even taking a conservative estimate of energy content of the living matter of  $4 \times 10^6 \text{ J/kg}$ , we conclude that the bacterium should have eaten itself about ten times in five days, had it possessed such a high respiration rate. The data of Mårdén et al. 1985 and Kjelleberg et al. 1982 were not included into the present analysis.
- 6) Acidophilic bacterium PW2 (Goulbourne et al. 1986) starved at pH 3 or 4 progressively lost both respiration and viability, with no stabilization. In the presence of  $\text{Mg}^+$  ions half-life of cells was 72 hr and respiration dropped from 84 nmol  $\text{O}_2 (\text{mg protein})^{-1} \text{min}^{-1} = 94 \text{ W/kg}$  to virtually zero.
- 7) Data needing verification (can be unrealistic): *Azospirillum brasiliense* Sp7 and *Azospirillum lipoferum* Sp59b respired endogeneously at 0.73 and 0.98  $\mu\text{mol O}_2 (\text{mg protein})^{-1} \text{min}^{-1}$ , respectively (820 and 1100 W/kg) (Martinez-Drets et al. 1984)

## References to Table **S1a**:

- Abu-Amero K.K., Halablab M.A., Miles R.J. (1996) Nisin resistance distinguishes *Mycoplasma* spp. from *Acholeplasma* spp. and provides a basis for selective growth media. *Applied and Environmental Microbiology* 62: 3107-3111.
- Adriaens P., Focht D.D. (1991) Cometabolism of 3,4-dichlorobenzoate by *Acinetobacter* sp. strain 4-CB1. *Applied and Environmental Microbiology* 57: 173-179.
- Adriaens P., Kohler H.P., Kohler-Staub D., Focht D.D. (1989) Bacterial dehalogenation of chlorobenzoates and coculture biodegradation of 4,4'-dichlorobiphenyl. *Applied and Environmental Microbiology* 55: 887-892.
- Allen R.D., Baumann P. (1971) Structure and arrangement of flagella in species of the genus *Beneckea* and *Photobacterium fischeri*. *Journal of Bacteriology* 107: 295-302.
- Altekar W.W., Rao M.R. (1963) Microbiological dissimilation of tricarballylate and trans-aconitate. *Journal of Bacteriology* 85: 604-613.
- Amy P.S., Morita R.Y. (1983) Starvation-survival patterns of sixteen freshly isolated open-ocean bacteria. *Applied and Environmental Microbiology* 45: 1109-1115.
- Bauer S., Tholen A., Overmann J., Brune A. (2000) Characterization of abundance and diversity of lactic acid bacteria in the hindgut of wood- and soil-feeding termites by molecular and culture-dependent techniques. *Archives of Microbiology* 173: 126-137.
- Baumann P., Baumann L., Mandel M. (1971) Taxonomy of marine bacteria: the genus *Beneckea*. *Journal of Bacteriology* 107: 268-294.

- Baumann P., Doudoroff M., Stanier R.Y. (1968) Study of the *Moraxella* Group. I. Genus *Moraxella* and the *Neisseria catarrhalis* group. *Journal of Bacteriology* 95: 58-73.
- Berg I.A., Filatova L.V., Ivanovsky R.N. (2002) Inhibition of acetate and propionate assimilation by itaconate via propionyl-CoA carboxylase in isocitrate lyase-negative purple bacterium *Rhodospirillum rubrum*. *FEMS Microbiology Letters* 216: 49-54.
- Biberstein E.L., Spencer P.D. (1962) Oxidative metabolism of *Haemophilus* species grown at different levels of hemin supplementation. *Journal of Bacteriology* 84: 916-920.
- Bishop D.H., Pandya K.P., King H.K. (1962) Ubiquinone and vitamin K in bacteria. *Biochemical Journal* 83: 606-614.
- Bisset K.A. (1953) Do bacteria have mitotic spindles, fusion tubes and mitochondria? *Journal of General Microbiology* 8: 50-57.
- Blizzard J.L., Peterson G.E. (1963) Selective inhibition of proline-induced pigmentation in washed cells of *Serratia marcescens*. *Journal of Bacteriology* 85: 1136-1140.
- Bluhm L., Ordal Z.J. (1969) Effect of sublethal heat on the metabolic activity of *Staphylococcus aureus*. *Journal of Bacteriology* 97: 140-150.
- Bohach G.A., Snyder I.S. (1983) Cyanobacterial stimulation of growth and oxygen uptake by *Legionella pneumophila*. *Applied and Environmental Microbiology* 46: 528-531.
- Bohin J.P., Rigomier D., Schaeffer P. (1976) Ethanol sensitivity of sporulation in *Bacillus subtilis*: a new tool for the analysis of the sporulation process. *Journal of Bacteriology* 127: 934-940.
- Bongers L. (1970) Energy generation and utilization in hydrogen bacteria. *Journal of Bacteriology* 104: 145-151.
- Boylen C.W. (1973) Survival of *Arthrobacter crystallopoietes* during prolonged periods of extreme desiccation. *Journal of Bacteriology* 113: 33-37.
- Boylen C.W., Ensign J.C. (1970) Intracellular substrates for endogenous metabolism during long-term starvation of rod and spherical cells of *Arthrobacter crystallopoietes*. *Journal of Bacteriology* 103: 578-587.
- Breznak J.A., Potrikus C.J., Pfennig N., Ensign J.C. (1978) Viability and endogenous substrates used during starvation survival of *Rhodospirillum rubrum*. *Journal of Bacteriology* 134: 381-388.
- Bruheim P., Bredholt H., Eimhjellen K. (1999) Effects of surfactant mixtures, including Corexit 9527, on bacterial oxidation of acetate and alkanes in crude oil. *Applied and Environmental Microbiology* 65: 1658-1661.
- Bryan-Jones D.G., Whittenbury R. (1969) Haematin-dependent oxidative phosphorylation in *Streptococcus faecalis*. *Journal of General Microbiology* 58: 247-260.
- Burleigh I.G., Dawes E.A. (1967) Studies on the endogenous metabolism and senescence of starved *Sarcina lutea*. *Biochemical Journal* 102: 236-250.
- Buswell J.A. (1975) Metabolism of phenol and cresols by *Bacillus stearothermophilus*. *Journal of Bacteriology* 124: 1077-1083.
- Cain R.B., Tranter E.K., Darrah J.A. (1968) The utilization of some halogenated aromatic acids by *Nocardia*. Oxidation and metabolism. *Journal of Bacteriology* 106: 211-227.
- Cartwright N.J., Cain R.B. Bacterial degradation of the nitrobenzoic acids. *Biochemical Journal* 71: 248-261.
- Chakrabarty A.M., Roy S.C. (1964) Nature of endogenous reserve material in a strain of *Pseudomonas fluorescens-putida* intermediate. *Biochemical Journal* 92: 105-112.

- Chapman P.J., Ribbons D.W. (1976) Metabolism of resorcinylic compounds by bacteria: alternative pathways for resorcinol catabolism in *Pseudomonas putida*. *Journal of Bacteriology* 125: 985-998.
- Chester B., Cooper L.H. (1979) *Achromobacter* species (CDC group Vd): morphological and biochemical characterization. *Journal of Clinical Microbiology* 9: 425-436.
- Cho H.W., Eagon R.G. (1967) Factors affecting the pathways of glucose catabolism and the tricarboxylic acid cycle in *Pseudomonas natriegens*. *Journal of Bacteriology* 93: 866-873.
- Church B.D., Halvorson H. (1957) Intermediate metabolism of aerobic spores: I. Activation of glucose oxidation in spores of *Bacillus cereus* var *terminalis*. *Journal of Bacteriology* 73: 470-476.
- Clifton C.E., Cherry J. (1966) Influence of glutamic acid on the endogenous respiration of *Bacillus subtilis*. *Journal of Bacteriology* 91: 546-550.
- Conn H.J., Dimmick I.J. (1947) Soil bacteria similar in morphology to *Mycobacterium* and *Corynebacterium*. *Journal of Bacteriology* 54: 291-303.
- Luscombe B.M., Gray T.R.G. (1974) Characteristics of *Arthrobacter* grown in continuous culture. *Journal of General Microbiology* 82: 213-222.
- Cooper R.A., Itiaba K., Kornberg H.L. (1965) The utilization of aconate and itaconate by *Micrococcus* sp. *Biochemical Journal* 94: 25-31.
- Cooper R.A., Kornberg H.L. (1964) The utilization of itaconate by *Pseudomonas* sp. *Biochemical Journal* 91: 82-91.
- Coulter C., Hamilton J.T., McRoberts W.C., Kulakov L., Larkin M.J., Harper D.B. (1999) Halomethane:bisulfide/halide ion methyltransferase, an unusual corrinoid enzyme of environmental significance isolated from an aerobic methylotroph using chloromethane as the sole carbon source. *Applied and Environmental Microbiology* 65: 4301-4312.
- Crawford I.P. (1954) A new fermentative pseudomonad, *Pseudomonas formicans*, n. sp. *Journal of Bacteriology* 68: 734-738.
- Crook P.G. (1952) The effect of heat and glucose on endogenous endospore respiration utilizing a modified Scholander microrespirometer. *Journal of Bacteriology* 63: 193-198.
- Dagley S., Gibson D.T. (1965) The bacterial degradation of catechol. *Biochemical Journal* 95: 466-474.
- Davis M.S., Bateman J.B. (1960) Relative humidity and the killing of bacteria II. Selective changes in oxidative activity associated with death. *Journal of Bacteriology* 80: 580-584.
- Dawes E.A., Holms W.H. (1958) Metabolism of *Sarcina lutea* I. Carbohydrate oxidation and terminal respiration. *Journal of Bacteriology* 75: 390-399.
- Dawes E.A., Ribbons D.W. (1965) Studies on the endogenous metabolism of *Escherichia coli*. *Biochemical Journal* 95: 332-343.
- Dawson M.J., Jones C.W. (1981) Respiration-linked proton translocation in the obligate methylotroph *Methylophilus methylotrophus*. *Journal of Biochemical Journal* 194: 915-924.
- De Ley J., Schell J. (1959) Oxidation of several substrates by *Acetobacter aceti*. *Journal of Bacteriology* 77: 445-451.
- Decker S.J., Lang D.R. (1977) *Bacillus megaterium* mutant deficient in membrane-bound adenosine triphosphatase activity. *Journal of Bacteriology* 131: 98-104.
- Devi N.A., Kutty R.K., Vasantharajan V.N., Rao P.V.S. (1975) Microbial metabolism of phenolic amines: Degradation of *dl*-synephrine by an unidentified arthrobacter. *Journal of Bacteriology* 122: 866-873.
- Dietrich S.M., Burriss R.H. (1967) Effect of exogenous substrates on the endogenous respiration of bacteria. *Journal of Bacteriology* 93: 1467-1470.



- Donnelly M.I., Chapman P.J., Dagley S. (1981) Bacterial degradation of 3,4,5-trimethoxyphenylacetic and 3-ketoglutaric acids. *Journal of Bacteriology* 147: 477-481.
- Donnelly M.I., Dagley S. (1980) Production of methanol from aromatic acids by *Pseudomonas putida*. *Journal of Bacteriology* 142: 916-924.
- Doudoroff M., Palleroni N.J., MacGee J., Ohara M. (1956) Metabolism of carbohydrates by *Pseudomonas saccharophila* I. Oxidation of fructose by intact cells and crude cell-free preparations. *Journal of Bacteriology* 71: 196-201.
- Droniuk R., Wong P.T., Wisse G., MacLeod R.A. (1987) Variation in quantitative requirements for Na<sup>+</sup> for transport of metabolizable compounds by the marine bacteria *Alteromonas haloplanktis* 214 and *Vibrio fischeri*. *Applied and Environmental Microbiology* 53: 1487-1495.
- Dworkin M., Niederpruem D.J. (1964) Electron transport system in vegetative cells and microcysts of *Myxococcus xanthus*. *Journal of Bacteriology* 87: 316-322.
- Eagon R.G. (1962) *Pseudomonas natriegens*, a marine bacterium with a generation time of less than 10 minutes. *Journal of Bacteriology* 83: 736-737.
- Eisenberg R.C., Butters S.J., Quay S.C., Friedman S.B. (1974) Glucose uptake and phosphorylation in *Pseudomonas fluorescens*. *Journal of Bacteriology* 120: 147-153.
- Engelhard W.E., Uyeno S., Pivnick H. (1957) Some modifications of mycobacteria effected with trypsin. *Journal of Bacteriology* 73: 206-210.
- Ensign J.C. (1970) Long-term starvation survival of rod and spherical cells of *Arthrobacter crystallopoietes*. *Journal of Bacteriology* 103: 569-577.
- Erlandson A.L. Jr., Ruhl R.F. (1956) Oxidative dissimilation of amino acids and related compounds by *Shigella flexneri*. *Journal of Bacteriology* 72: 708-712.
- Euzéby J.P. (1997) List of bacterial names with standing in nomenclature: a folder available on the Internet. *International Journal of Systematic Bacteriology* (List of prokaryotic names with standing in nomenclature. Last full update November 03, 2006. URL: <http://www.bacterio.net>).
- Faulkner G., Garduño R.A. (2002) Ultrastructural analysis of differentiation in *Legionella pneumophila*. *Journal of Bacteriology* 184: 7025-7041.
- Feofilova E.P., Lebedeva N.E., Tapytkova S.D., Kirillova N.F. (1966) Study on respiration of pigmented and leuco-variants of *Actinomyces longispororuber*. *Mikrobiologija* 35: 651-659.
- Forbes M., Kuck N.A., Peets E.A. (1962) Mode of action of ethambutol. *Journal of Bacteriology* 84: 1099-1103.
- Frederick J.J., Corner T.R., Gerhardt P. (1974) Antimicrobial actions of hexachlorophene: inhibition of respiration in *Bacillus megaterium*. *Antimicrobial Agents and Chemotherapy* 6: 712-721.
- Friedberg D., Friedberg I. (1976) Membrane-associated, energy-linked reactions in *Bdellovibrio bacteriovorus*. *Journal of Bacteriology* 127: 1382-1388.
- Friedman M.E., Alm W.L. (1962) Effect of glucose concentration in the growth medium on some metabolic activities of *Listeria monocytogenes*. *Journal of Bacteriology* 84: 375-376.
- Frustaci J.M., Sangwan I., O'Brian M.R. (1991) Aerobic growth and respiration of a  $\delta$ -aminolevulinic acid synthase (*hemA*) mutant of *Bradyrhizobium japonicum*. *Journal of Bacteriology* 173: 1145-1150.
- Fu Y., O'Kelly C., Sieracki M., Distel D.L. (2003) Protistan grazing analysis by flow cytometry using prey labeled by in vivo expression of fluorescent proteins. *Applied and Environmental Microbiology* 69: 6848-6855.
- Gary N.D., Bard R.C. (1952) Effect of nutrition on the growth and metabolism of *Bacillus subtilis*. *Journal of Bacteriology* 64: 501-512.

- Gaudy A.F. Jr., Gaudy E.T., Komolrit K. (1963) Multicomponent substrate utilization by natural populations and a pure culture of *Escherichia coli*. *Applied Microbiology* 11: 157-162.
- Gerhardt P., Levine H.B., Wilson J.B. (1950) The oxidative dissimilation of amino acids and related compounds by *Brucella abortus*. *Journal of Bacteriology* 60: 459-467.
- Gilmour C.M., Butterworth E.M., Noble E.P., Wang C.H. (1955) Studies on the biochemistry of the streptomyces I. Terminal oxidative metabolism in *Streptomyces griseus*. *Journal of Bacteriology* 69: 719-724.
- Goldschmidt M.C., Wyss O. (1966) Chelation effects on *Azotobacter* cells and cysts. *Journal of Bacteriology* 91: 120-124.
- Goulbourne E. Jr., Matin M., Zychlinsky E., Matin A. (1986) Mechanism of  $\Delta$ pH maintenance in active and inactive cells of an obligately acidophilic bacterium. *Journal of Bacteriology* 166: 59-65.
- Gray C.T. (1952) The respiratory metabolism of murine leprosy bacilli. *Journal of Bacteriology* 64: 305-313.
- Greisen E.C., Gunsalus I.C. (1944) An alcohol oxidation system in streptococci which functions without hydrogen peroxide accumulation. *Journal of Bacteriology* 48: 515-525.
- Gronlund A.F., Campbell J.J. (1961) Nitrogenous compounds as substrates for endogenous respiration in microorganisms. *Journal of Bacteriology* 81: 721-724.
- Gronlund A.F., Campbell J.J. (1963) Nitrogenous substrates of endogenous respiration in *Pseudomonas aeruginosa*. *Journal of Bacteriology* 86: 58-66.
- Gronlund A.F., Campbell J.J. (1966) Influence of exogenous substrates on the endogenous respiration of *Pseudomonas aeruginosa*. *Journal of Bacteriology* 91: 1577-1581.
- Groupé V., Pugh L.H., Levine A.S., Herrmann E.C. Jr. (1954) Suppression of certain viral lesions by a microbial product, xerosin, lacking in demonstrable antiviral properties and produced by *Achromobacter xerosis*, n. sp. *Journal of Bacteriology* 68: 10-18.
- Gunter S.E., Kohn H.I. (1956) Effect of X-rays on the survival of bacteria and yeast II. Relation of cell concentration and endogenous respiration to sensitivity. *Journal of Bacteriology* 72: 422-428.
- Gunter S.E., Kohn H.I. (1956) Effect of X-rays on the survival of bacteria and yeast II. Relation of cell concentration and endogenous respiration to sensitivity. *Journal of Bacteriology* 72: 422-428.
- Hareland W.A., Crawford R.L., Chapman P.J., Dagley S. (1975) Metabolic function and properties of 4-hydroxyphenylacetic acid 1-hydroxylase from *Pseudomonas acidovorans*. *Journal of Bacteriology* 121: 272-285.
- Harper D.B. (1977) Microbial metabolism of aromatic nitriles. Enzymology of C-N cleavage by *Nocardia* sp. (*Rhodochrous* group) N.C.I.B. 11216. *Biochemical Journal* 165: 309-319.
- Hayase N., Yano H., Kudoh E., Tsutsumi C., Ushio K., Miyahara Y., Tanaka S., Katsuhiko N. (2004) Isolation and characterization of poly(butylene succinate-co-butylene adipate)-degrading microorganism. *Journal of Bioscience and Bioengineering* 97: 131-133.
- Hespell R.B., Rosson R.A., Thomashow M.F., Rittenberg S.C. (1973) Respiration of *Bdellovibrio bacteriovorus* strain 109J and its energy substrates for intraperiplasmic growth. *Journal of Bacteriology* 113: 1280-1288.
- Hoffee P., Englesberg E. (1962) Effect of metabolic activity of the glucose permease of bacterial cells. *Proceedings of the National Academy of Sciences USA* 48: 1759-1765.

- Hollocher T.C., Kumar S., Nicholas D.J. (1982) Respiration-dependent proton translocation in *Nitrosomonas europaea* and its apparent absence in *Nitrobacter agilis* during inorganic oxidations. *Journal of Bacteriology* 149: 1013-1020.
- Holt J.G. (ed.) (1984, 1986, 1989) *Bergey's Manual of Systematic Bacteriology*, Vols. 1-4. Williams & Wilkins, Baltimore.
- Holt J.G., Krieg N.R., Sneath P.H.A., Staley J.T., Williams S.T. (eds.) (1994) *Bergey's Manual of Determinative Bacteriology*, Ninth Edition. Williams & Wilkins, Baltimore.
- Hou C.I., Gronlund A.F., Campbell J.J. (1966) Influence of phosphate starvation on cultures of *Pseudomonas aeruginosa*. *Journal of Bacteriology* 92: 851-855.
- Huang C.-Y., Garcia J.-L., Patel B.K.C., Cayol J.-L., Baresi L., Mah R.A. (2000) *Salinivibrio costicola* subsp. *vallismortis* subsp. nov., a halotolerant facultative anaerobe from Death Valley, and emended description of *Salinivibrio costicola*. *International Journal of Systematic and Evolutionary Microbiology* 50: 615-622
- Huber T.W., Schuhardt V.T. (1970) Lysostaphin-induced, osmotically fragile *Staphylococcus aureus* cells. *Journal of Bacteriology* 103: 116-119.
- Hughes D.E. (1965) The metabolism of halogen-substituted benzoic acids by *Pseudomonas fluorescens*. *Biochemical Journal* 96: 181-188.
- Hulcher F.H., King K.W. (1958a) Metabolic basis for disaccharide preference in a *Cellvibrio*. *Journal of Bacteriology* 76: 571-577.
- Hulcher F.H., King K.W. (1958b) Disaccharide preference of an aerobic cellulolytic bacterium, *Cellvibrio gilvus* n. sp. *Journal of Bacteriology* 76: 565-570.
- Hunter G.J. (1953) The oxidation of glycerol by mycobacteria. *Biochemical Journal* 55: 320-328.
- Ingram M. (1940) The endogenous respiration of *Bacillus cereus*: III. The changes in the rate of respiration caused by sodium chloride, in relation to hydrogen-ion concentration. *Journal of Bacteriology* 40: 683-694.
- Isenberg H.D., Schatz A., Angrist A.A., Schatz V., Trelawny G.S. (1954) Microbial metabolism of carbamates II. Nitrification of urethan by *Streptomyces nitrificans*. *Journal of Bacteriology* 68: 5-9.
- Jacobs N.J., Conti S.F. (1965) Effect of hemin on the formation of the cytochrome system of anaerobically grown *Staphylococcus epidermidis*. *Journal of Bacteriology* 89: 675-679.
- Jacoby GA. (1964) The induction and repression of amino acid oxidation in *Pseudomonas fluorescens*. *Biochemical Journal* 92: 1-8.
- Jenkins O., Byrom D., Jones D. (1987) *Methylophilus*: a new genus of methanol-utilizing bacteria. *International Journal of Systematic Bacteriology* 37: 446-448.
- Jigami Y., Kawasaki Y., Omori T., Minoda Y. (1979) Coexistence of different pathways in the metabolism of *n*-propylbenzene by *Pseudomonas* sp. *Applied and Environmental Microbiology* 38: 783-788.
- Johnson E.J., Sobek J.M., Clifton C.E. (1958) Oxidative assimilation by *Azotobacter agilis*. *Journal of Bacteriology* 76: 658-661.
- Jones A., Turner J.M. (1979) Microbial metabolism of amino alcohols. 1-Aminopropan-2-ol and ethanolamine metabolism via propionaldehyde and acetaldehyde in a species of *Pseudomonas*. *Biochemical Journal* 134: 167-182.
- Jurtshuk P. Jr., Marcucci O.M., McQuitty D.N. (1975) Tetramethyl-p-phenylenediamine oxidase reaction in *Azotobacter vinelandii*. *Applied Microbiology* 30: 951-958.
- Jurtshuk P. Jr., McQuitty D.N. (1976) Use of a quantitative oxidase test for characterizing oxidative metabolism in bacteria. *Applied and Environmental Microbiology* 31: 668-679.

- Kahn M.E., Gromkova R. (1981) Occurrence of pili on and adhesive properties of *Haemophilus parainfluenzae*. *Journal of Bacteriology* 145: 1075-1078.
- Kanso S., Greene A.C., Patel B.K.C. (2002) *Bacillus subterraneus* sp. nov., an iron- and manganese-reducing bacterium from a deep subsurface Australian thermal aquifer. *International Journal of Systematic and Evolutionary Microbiology* 52: 869-874.
- Keevil C.W., Anthony C. (1979) Effect of growth conditions on the involvement of cytochrome c in electron transport, proton translocation and ATP synthesis in the facultative methylotroph *Pseudomonas* AM1. *Biochemical Journal* 182: 71-79.
- Kelly D.P., Wood A.P. (2000) Reclassification of some species of *Thiobacillus* to the newly designated genera *Acidithiobacillus* gen. nov., *Halothiobacillus* gen. nov. and *Thermithiobacillus* gen. nov. *International Journal of Systematic and Evolutionary Microbiology* 50: 511-516.
- Kenimer E.A., Lapp D.F. (1978) Effects of elected inhibitors on electron transport in *Neisseria gonorrhoeae*. *Journal of Bacteriology* 134: 537-545.
- Kjelleberg S. Humphrey B.A. Marshall K.C. (1982) Effect of interfaces on small, starved marine bacteria. *Applied and Environmental Microbiology* 43: 1166-1172.
- Kornberg H.L. (1958) The metabolism of C<sub>2</sub> compounds in micro-organisms. 1. The incorporation of 2-<sup>14</sup>Cacetate by *Pseudomonas fluorescens*, and by a *Corynebacterium*, grown on ammonium acetate. *Biochemical Journal* 68: 535-542.
- Kornberg H.L., Gotto A.M. (1961) The metabolism of C<sub>2</sub> compounds in micro-organisms. 6. Synthesis of cell constituents from glycollate by *Pseudomonas* sp. *Biochemical Journal* 78: 69-82.
- Kornberg H.L., Morris J.G. (1965) The utilization of glycollate by *Micrococcus denitrificans*: the β-hydroxyaspartate pathway. *Biochemical Journal* 95: 577-586.
- Kowalski W., Bahnfleth W., Whittam T. (1999) Filtration of airborne microorganisms: modeling and prediction. *ASHRAE Transactions* 105: 4-17.
- Kratz W.A., Myers J. (1955) Photosynthesis and respiration of three blue-green algae. *Plant Physiology* 30: 275-280.
- Krieg R. (1976) Biology of the chemoheterotrophic spirilla. *Bacteriological Reviews* 40: 55-115.
- Krzemiński Z., Mikucki J., Szarapińska-Kwaszewska J. (1972) Endogenous metabolism of *Staphylococcus aureus*. *Folia Microbiologica* 17: 46-54.
- Kubitschek H.E. (1969) Growth during the bacterial cell cycle: analysis of cell size distribution. *Biophysical Journal* 9: 792-809.
- Kumazawa S., Izawa S., Mitsui A. (1983) Proton efflux coupled to dark H<sub>2</sub> oxidation in whole cells of a marine sulfur photosynthetic bacterium (*Chromatium* sp. strain Miami PBS1071). *Journal of Bacteriology* 154: 185-191.
- Kunz D.A., Chapman P.J. (1981) Catabolism of pseudocumene and 3-ethyltoluene by *Pseudomonas putida* (arvilla) mt-2: evidence for new functions of the TOL (pWWO) plasmid. *Journal of Bacteriology* 146: 179-191.
- Kushner D.J., Hamaide F., MacLeod R.A. (1983) Development of salt-resistant active transport in a moderately halophilic bacterium. *Journal of Bacteriology* 153: 1163-1171.
- Lawford H.G., Haddock B.A. (1973) Respiration-driven proton translocation in *Escherichia coli*. *Biochemical Journal* 136: 217-220.
- Lee M., Chandler A.C. (1941) A study of the nature, growth and control of bacteria in cutting compounds. *Journal of Bacteriology* 41: 373-386.
- Levine S., Krampitz L.O. (1952) The oxidation of acetone by a soil diphtheroid. *Journal of Bacteriology* 64: 645-650.
- Lindmark D.G., Jarroll E.L., Timoney P.J., Shin S.J. (1982) Energy metabolism of the contagious equine metritis bacterium. *Infection and Immunity* 36: 531-534.
- Loh W.H.-T. (1984) Intermediary carbon metabolism of *Azospirillum braziliense*. *Journal of Bacteriology* 158: 264-268.

- London J., Rittenberg S.C. (1966) Effects of organic matter on the growth of *Thiobacillus intermedius*. *Journal of Bacteriology* 91: 1062-1069.
- Lontoh S., DiSpirito A.A., Semrau J.D. (1999) Dichloromethane and trichloroethylene inhibition of methane oxidation by the membrane-associated methane monooxygenase of *Methylosinus trichosporium* OB3b. *Archives of Microbiology* 171: 301-308.
- Maitra P.K., Roy S.C. (1961) Tricarboxylic acid-cycle activity in *Streptomyces olivaceus*. *Biochemical Journal* 79: 446-456.
- Majtán V., Majtánová L. (1999) The effect of new disinfectant substances on the metabolism of *Enterobacter cloacae*. *International Journal of Antimicrobial Agents* 11: 59-64.
- Majtán V., Majtánová L., Hošťacká A., Hybenová D., Mlynarčík D. (1995) Effect of quaternary ammonium salts and amine oxides on *Pseudomonas aeruginosa*. *Microbios* 84: 41-51.
- Makarieva A.M., Gorshkov V.G., Li B.-L. (2005) Energetics of the smallest: Do bacteria breathe at the same rate as whales? *Proceedings of the Royal Society of London, Biological Series* 272: 2219-2224.
- Mallavia L.P., Weiss E. (1970) Catabolic activities of *Neisseria meningitidis*: Utilization of glutamate. *Journal of Bacteriology* 101: 127-132.
- Mårdén P., Tunlid A., Malmcrona-Friberg K., Odham G., Kjelleberg S. (1985) Physiological and morphological changes during short term starvation of marine bacterial isolates. *Archives of Microbiology* 142: 326-332.
- Marquis R.E. (1965) Nature of the bactericidal action of antimycin A for *Bacillus megaterium*. *Journal of Bacteriology* 89: 1453-1459.
- Martinez-Drets G., Del Gallo M., Burpee C., Burris R.H. (1984) Catabolism of carbohydrates and organic acids and expression of nitrogenase by *Azospirilla*. *Journal of Bacteriology* 159: 80-85.
- Mas J., Pedrós-Alió C., Guerrero R. (1985) Mathematical model for determining the effects of intracytoplasmic inclusions on volume and density of microorganisms. *Journal of Bacteriology* 164: 749-756.
- Mathews M.M., Siström W.R. (1959) Intracellular location of carotenoid pigments and some respiratory enzymes in *Sarcina lutea*. *Journal of Bacteriology* 78: 778-787.
- McVittie A., Messik F., Zahler S.A. (1962) Developmental biology of *Myxococcus*. *Journal of Bacteriology* 84: 546-551.
- Meagher R.B., McCorkle G.M., Ornston M.K., Ornston L.N. (1972) Inducible uptake system for  $\beta$ -carboxy-*cis*, *cis*-muconate in a permeability mutant of *Pseudomonas putida*. *Journal of Bacteriology* 111: 465-473.
- Mescher M.F., Strominger J.L. (1976) Structural (shape-maintaining) role of the cell surface glycoprotein of *Halobacterium salinarium*. *Proceedings of the National Academy of Sciences of the United States of America* 73: 2687-2691.
- Mickelson M.N. (1967) Aerobic metabolism of *Streptococcus agalactiae*. *Journal of Bacteriology* 94: 184-191.
- Midwinter G.G., Batt R.D. (1960) Endogenous respiration and oxidative assimilation in *Nocardia corallina*. *Journal of Bacteriology* 79: 9-17.
- Minami K. (1957) Bactericidal action of oleic acid for tubercle bacilli: I. Quantitative and analytical survey of the action. *Journal of Bacteriology* 73: 338-344.
- Jayasuriya G.C.N. (1956) The oxidative properties of an oxalate-decomposing organism, *Pseudomonas* OD1, with particular reference to the synthesis of citrate from glycollate. *Biochemical Journal* 64: 469-477.
- Mitruka B.M., Costilow R.N., Black S.H., Pepper R.E. (1967) Comparisons of cells, refractile bodies, and spores of *Bacillus popilliae*. *Journal of Bacteriology* 94: 759-765.

- Montesinos E., Esteve I., Guerrero R. (1983) Comparison between direct methods for determination of microbial cell volume: electron microscopy and electronic particle sizing. *Applied and Environmental Microbiology* 45: 1651-1658.
- Morawski B., Eaton R.W., Rossiter J.T., Guoping S., Griengl H., Ribbons D.W. (1997) 25: 2-Naphthoate catabolic pathway in *Burkholderia* strain JT 1500. *Journal of Bacteriology* 179: 115-121.
- Mori T., Miyata Y., Kohsaka K., Makino M. (1985) Respiration in *Mycobacterium leprae*. *International Journal of Leprosy* 53: 600-609.
- Morton D.S., Oliver J.D. (1994) Induction of carbon starvation-induced proteins in *Vibrio vulnificus*. *Applied and Environmental Microbiology* 60: 3653-3659.
- Nagata T. (1986) Carbon and nitrogen content of natural planktonic bacteria. *Applied and Environmental Microbiology* 52: 28-32.
- Nickerson W.J., Sherman F.G. (1952) Metabolic aspects of bacterial growth in the absence of cell division II. Respiration of normal and filamentous cells of *Bacillus cereus*. *Journal of Bacteriology* 64: 667-678.
- Niederpruem D.J., Hackett D.P. (1961) Respiratory chain of *Streptomyces*. *Journal of Bacteriology* 81: 557-563.
- Novitsky J.A., Morita R.Y. (1976) Morphological characterization of small cells resulting from nutrient starvation of a psychrophilic marine vibrio. *Applied and Environmental Microbiology* 32: 617-622.
- Novitsky J.A., Morita R.Y. (1977) Survival of a psychrophilic marine vibrio under long-term nutrient starvation. *Applied and Environmental Microbiology* 33: 635-641.
- O'Keeffe D.T., Anthony C. (1978) The microbial metabolism of C<sub>1</sub> compounds. The stoichiometry of respiration-driven proton translocation in *Pseudomonas* AM1 and in a mutant lacking cytochrome c. *Biochemical Journal* 170: 561-567.
- Ougham H.J., Trudgill P.W. (1982) Metabolism of cyclohexaneacetic acid and cyclohexanebutyric acid by *Arthrobacter* sp. strain CA1. *Journal of Bacteriology* 150: 1172-1182.
- Overmann J., Pfennig N. (1992) Continuous chemotrophic growth and respiration of Chromatiaceae species at low oxygen concentrations. *Archives of Microbiology* 158: 59-67.
- Packer L., Vishniac W. (1955) Chemosynthetic fixation of carbon dioxide and characteristics of hydrogenase in resting cell suspensions of *Hydrogenomonas ruflandii* nov. spec. *Journal of Bacteriology* 70: 216-223.
- Palese L.L., Gaballo A., Technikova-Dobrova Z., Labonia N., Abbrescia A., Scacco S., Micelli L., Papa S. (2003) Characterization of plasma membrane respiratory chain and ATPase in the actinomycete *Nonomuraea* sp. ATCC 39727. *FEMS Microbiology Letters* 228: 233-239.
- Yu E.K., DeVoe I.W. (1980) Terminal branching of the respiratory electron transport chain in *Neisseria meningitidis*. *Journal of Bacteriology* 142: 879-887.
- Pan P.H.C. (1971) Lack of distinction between *Nitrobacter agilis* and *Nitrobacter winogradskyi*. *Journal of Bacteriology* 108: 1416-1418.
- Peel D., Quayle J.R. (1961) Microbial growth on C<sub>1</sub> compounds. 1. Isolation and characterization of *Pseudomonas* AM1. *Biochemical Journal* 81: 465-469.
- Pepper R.E., Costilow R.N. (1964) Glucose catabolism by *Bacillus popilliae* and *Bacillus lentimorbus*. *Journal of Bacteriology* 87: 303-310.
- Peterson J.A. (1970) Cytochrome content of two pseudomonads containing mixed-function oxidase systems. *Journal of Bacteriology* 103: 714-721.
- Peterson J.B., LaRue T.A. (1982) Soluble aldehyde dehydrogenase and metabolism of aldehydes by soybean bacteroids. *Journal of Bacteriology* 151: 1473-1484.

- Ramsey H.H. (1962) Endogenous respiration of *Staphylococcus aureus*. Journal of Bacteriology 83: 507-514.
- Raymond R.L., Jamison V.W., Hudson J.O. (1967) Microbial hydrocarbon co-oxidation: I. Oxidation of mono- and dicyclic hydrocarbons by soil isolates of the genus *Nocardia*. Applied Microbiology 15: 857-865.
- Reed W.M., Dugan P.R. (1979) Study of developmental stages of *Methylosinus trichosporium* with the aid of fluorescent-antibody staining techniques. Applied and Environmental Microbiology 38: 1179-1183.
- Rittenberg SC, Shilo M. (1970) Early host damage in the infection cycle of *Bdellovibrio bacteriovorus*. Journal of Bacteriology 102: 149-160.
- Robertson J.G., Batt R.D. (1973) Survival of *Nocardia corallina* and degradation of constituents during starvation. Journal of General Microbiology 78: 109-117.
- Rogoff M.H. (1962) Chemistry of oxidation of polycyclic aromatic hydrocarbons by soil pseudomonads. Journal of Bacteriology 83: 998-1004.
- Sabina L.R., Pivnick H. (1956) Oxidation of soluble oil emulsions and emulsifiers by *Pseudomonas oleovorans* and *Pseudomonas formicans*. Applied Microbiology 4: 171-175.
- Sariaslani F.S., Sudmeier T.J.L., Focht D.D. (1982) Degradation of 3-phenylbutyric acid by *Pseudomonas* sp. Journal of Bacteriology 152: 411-421.
- Schatz A., Bovell C. Jr. (1952) Growth and hydrogenase activity of a new bacterium, *Hydrogenomonas facilis*. Journal of Bacteriology 63: 87-98.
- Schleper C., Puehler G., Holz I., Gambacorta A., Janekovic D., Santarius U., Klenk H.-P., Zillig W. (1995) *Picrophilus* gen. nov., fam. nov.: a novel aerobic, heterotrophic, thermoacidophilic genus and family comprising archaea capable of growth around pH 0. Journal of Bacteriology 177: 7050-7059.
- Sebek O.K., Barker H.A. (1968) Metabolism of  $\beta$ -methylaspartate by a pseudomonad. Journal of Bacteriology 96: 2094-2098.
- Segal W., Bloch H. (1956) Biochemical differentiation of *Mycobacterium tuberculosis* grown in vivo and in vitro. Journal of Bacteriology 72: 132-141.
- Shaw DR. (1956) Polyol dehydrogenases. 3. Galactitol dehydrogenase and D-iditol dehydrogenase. Biochemical Journal 64: 394-405.
- Sierra G., Gibbons N.E. (1962) Role and oxidation pathway of poly- $\beta$ -hydroxybutyric acid in *Micrococcus halodenitrificans*. Canadian Journal of Microbiology 8: 255-269.
- Silver M. (1970) Oxidation of elemental sulfur and sulfur compounds and CO<sub>2</sub> fixation by *Ferrobacillus ferrooxidans* (*Thiobacillus thiooxidans*). Canadian Journal of Microbiology 16: 845-848.
- Smith A., Tranter E.K., Cain R.B. (1968) The utilization of some halogenated aromatic acids by *Nocardia*. Effects on the growth and enzyme induction. Journal of Bacteriology 106: 203-209.
- Smith A.J., Hoare D.S. (1968) Acetate assimilation by *Nitrobacter agilis* in relation to its "obligate autotrophy". Journal of Bacteriology 95: 844-855.
- Sobek J.M., Charba J.F., Foust W.N. (1966) Endogenous metabolism of *Azotobacter agilis*. Journal of Bacteriology 92: 687-695.
- Sobek J.M., Talburt D.E. (1968) Effects of the rare earth cerium on *Escherichia coli*. Journal of Bacteriology 95: 47-51.
- Sorokin D.Y., Jones B.E., Kuenen J.G. (2000) An obligate methylotrophic, methane-oxidizing *Methylobacterium* species from a highly alkaline environment. Extremophiles 4: 145-155.
- Sparnins V.L., Chapman P.J. (1976) Catabolism of L-tyrosine by the homoprotocatechuate pathway in gram-positive bacteria. Journal of Bacteriology 127: 362-366.
- Sparnins V.L., Chapman P.J., Dagley S. (1974) Bacterial degradation of 4-hydroxyphenylacetic acid and homoprotocatechuic acid. Journal of Bacteriology 120: 159-167.

- Spendlove R., Weiser H.H., Harper W.J. (1957) Factors affecting the initiation of respiration of *Streptococcus lactis*. Applied Microbiology 5: 281-285.
- Stevenson J. (1966) The specific requirement for sodium chloride for the active uptake of l-glutamate by *Halobacterium salinarium*. Journal of Bacteriology 99: 257-260.
- Stokes J.L. (1954) Studies on the filamentous sheathed iron bacterium *Sphaerotilus natans*. Journal of Bacteriology 67: 278-291.
- Straley S.C., LaMarre A.G., Lawrence L.J., Conti S.F. (1979) Chemotaxis of *Bdellovibrio bacteriovorus* toward pure compounds. Journal of Bacteriology 140: 634-642.
- Subba-Rao R.V., Alexander M. (1977) Products formed from analogues of 1,1,1-trichloro-2,2-bis(p-chlorophenyl)ethane (DDT) metabolites by *Pseudomonas putida*. Applied and Environmental Microbiology 33: 101-108.
- Subba-Rao R.V., Alexander M. (1985) Bacterial and fungal cometabolism of 1,1,1-trichloro-2,2-bis(4-chlorophenyl)ethane (DDT) and its breakdown products. Applied and Environmental Microbiology 49: 509-516.
- Takayanagi S., Kawasaki H., Sugimori K., Yamada T., Sugai A., Ito T., Yamasato K., Shioda M. (1996) *Sulfolobus hakonensis* sp. nov., a novel species of acidothermophilic archaeon. International Journal of Systematic Bacteriology 46: 377-382.
- Takeo K., Uesaka I. (1975) Existence of a simple configuration in the wall surface of *Nocardia mycellium*. Journal of General Microbiology 87: 373-376.
- Tappe W., Laverman A., Bohland M., Braster M., Rittershaus S., Groeneweg J., van Verseveld H.W. (1999) Maintenance energy demand and starvation recovery dynamics of *Nitrosomonas europaea* and *Nitrobacter winogradskyi* cultivated in a retentostat with complete biomass retention. Applied and Environmental Microbiology 65: 2471-2477.
- Taylor B.F. (1983) Aerobic and anaerobic catabolism of vanillic acid and some other methoxy-aromatic compounds by *Pseudomonas* sp. strain PN-1. Applied and Environmental Microbiology 46: 1286-1292.
- Tepper B.S. (1968) Differences in the utilization of glycerol and glucose by *Mycobacterium phlei*. Journal of Bacteriology 95: 1713-1717.
- Tesh M.J., Morse S.A., Miller R.D. (1983) Intermediary metabolism in *Legionella pneumophila*: Utilization of amino acids and other compounds as energy sources. Journal of Bacteriology 154: 1104-1109.
- Tisa L.S., Ensign J.C. (1987) Isolation and nitrogenase activity of vesicles from Frankia sp. strain EAN<sub>I</sub><sub>pec</sub>. Journal of Bacteriology 169: 5054-5059.
- Tomlinson G.A., Campbell J.J. (1963) Patterns of oxidative assimilation in strains of *Pseudomonas* and *Achromobacter*. Journal of Bacteriology 86: 434-444.
- Tros M.E., Bosma T.N.P., Schraa G., Zehnder A.J.B. (1996) Measurement of minimum substrate concentration ( $S_{min}$ ) in a recycling fermentor and its prediction from the kinetic parameters of *Pseudomonas* sp. strain B13 from batch and chemostat cultures. Applied and Environmental Microbiology 62: 3655-3661.
- Trudinger P.A. (1967) Metabolism of thiosulfate and tetrathionate by heterotrophic bacteria from soil. Journal of Bacteriology 93: 550-559.
- Tsai J.C., Aladegbami S.L., Vela G.R. (1979) Phosphate-limited culture of *Azotobacter vinelandii*. Journal of Bacteriology 139: 639-645.
- Van de Vossenberg J.L.C.M., Driessen A.J.M., Zillig W., Konings W.N. (1998) Bioenergetics and cytoplasmic membrane stability of the extreme acidophilic thermophilic archaeon *Picrophilus oshimae*. Extremophiles 2: 67-74.



- Van Ginkel C.G., Van Dijk J.B., Kroon A.G.M. (1992) Metabolism of hexadecyltrimethylammonium chloride in *Pseudomonas* strain B1. Applied and Environmental Microbiology 58: 3083-3087.
- Van Niel E.W.J., Gottschal J.C. (1998) Oxygen consumption by *Desulfovibrio* strains with and without polyglucose. Applied and Environmental Microbiology 64: 1034-1039.
- Van Veen H.W., Abee T., Kortstee G.J., Konings W.N., Zehnder A.J. (1993) Characterization of two phosphate transport systems in *Acinetobacter johnsonii* 210A. Journal of Bacteriology 175: 200-206.
- Vangnai A.S., Sayavedra-Soto S.A., Arp D.J. (2002) Roles for the two 1-butanol dehydrogenases of *Pseudomonas butanovora* in butane and 1-butanol metabolism. Journal of Bacteriology 184: 4343-4350.
- Ventosa A., Nieto J.N.J., Oren A. (1998) Biology of moderately halophilic aerobic bacteria. Microbiology and Molecular Biology Reviews 62: 504-544.
- Vogler K.G. (1942a) The presence of an endogenous respiration in the autotrophic bacteria. Journal of General Physiology 25: 617-622.
- Vogler K.G. (1942b) Studies on the metabolism of autotrophic bacteria. II. The nature of the chemosynthetic reaction. Journal of General Physiology 26: 103-117.
- Walker J.R. (1959) Pyruvate metabolism in *Lactobacillus brevis*. Biochemical Journal 72: 188-192.
- Warren R.A., Ells A.F., Campbell J.J. (1960) Endogenous respiration of *Pseudomonas aeruginosa*. Journal of Bacteriology 79: 875-879.
- Watson G.K., Cain R.B. (1975) Microbial metabolism of the pyridine ring. Metabolic pathways of pyridine biodegradation by soil bacteria. Biochemical Journal 146: 157-172.
- Weinstein I., Guss M.L., Altenbern R.A. (1962) Pyruvate oxidation by *Pasteurella tularensis* strains of graded virulence. Journal of Bacteriology 83: 1010-1016.
- Welch D.F., Sword C.P., Brehm S., Dusanic D. (1979) Relationship between superoxide dismutase and pathogenic mechanisms of *Listeria monocytogenes*. Infection and Immunity 23: 863-872.
- Wen A., Fegan M., Hayward C., Chakraborty S., Sly L.I. (1999) Phylogenetic relationships among members of the *Comamonadaceae*, and description of *Delftia acidovorans* (den Dooren de Jong 1926 and Tamaoka et al. 1987) gen. nov., comb. nov. International Journal of Systematic Bacteriology 49: 567-576.
- Wessman G.E., Miller D.J. (1966) Biochemical and physical changes in shaken suspensions of *Pasteurella pestis*. Applied Microbiology 14: 636-642.
- White D.C. (1962) Cytochrome and catalase patterns during growth of *Haemophilus parainfluenzae*. Journal of Bacteriology 83: 851-859.
- Wieslander A., Nordström S., Dahlqvist A., Rilfors L., Lindblom G. (1987) Membrane lipid composition and cell size of *Acholeplasma laidlawii* strain A are strongly influenced by lipid acyl chain length. European Journal of Biochemistry 227: 734-744.
- Yotis W.W. (1963) Absorption of the antibacterial serum factor by staphylococci. Journal of Bacteriology 85: 911-917.
- Yotis W.W., Ekstedt R.D. (1959) Studies on staphylococci I. Effect of serum and coagulase on the metabolism of coagulase positive and coagulase negative strains. Journal of Bacteriology 78: 567-574.
- Youmans A.S., Youmans G.P. (1962a) Effect of mycosuppressin on the course of experimental tuberculosis in mice. Journal of Bacteriology 84: 701-707.

Youmans A.S., Youmans G.P. (1962b) Effect of mycosuppressin on the respiration and growth of *Mycobacterium tuberculosis*. Journal of Bacteriology 84: 708-715.

Youmans A.S., Youmans G.P., Hegre A. Jr. (1960) Effect of homogenates of organs from immunized guinea pigs on the respiration of *Mycobacterium tuberculosis*. Journal of Bacteriology 80: 394-399.

Zubkov M.V. Fuchs B.M., Eilers H., Burkill P.H., Amann R. (1999) Determination of total protein content of bacterial cells by SYPRO staining and flow cytometry. Applied and Environmental Microbiology 65: 3251-3257.

Table **S1b**. Numeric values used in the analyses presented in Figures 1-3 and Table 1 in the paper (after Table S1a). Log is decimal logarithm of the corresponding variable.

|     | Valid name                           | Class: Order                         | MIN | qWkg | LogqWkg | TC | q25Wkg | Logq25Wkg | Mpg  | LogMpg |
|-----|--------------------------------------|--------------------------------------|-----|------|---------|----|--------|-----------|------|--------|
| 1.  | <i>Acetobacter aceti</i>             | Clostridia: Clostridiales            | MIN | 0.6  | -0.222  | 30 | 0.42   | -0.377    | 0.75 | -0.125 |
| 2.  | <i>Acholeplasma laidlawii</i>        | Mollicutes: Acholeplasmatales        | MIN | 1.4  | 0.146   | 37 | 0.61   | -0.215    | 0.04 | -1.398 |
| 3.  | <i>Achromobacter ruhlandii</i>       | Betaproteobacteria: Burkholderiales  | MIN | 15   | 1.176   | 30 | 10.61  | 1.026     | 0.2  | -0.699 |
| 4.  | <i>Achromobacter</i> sp.             | Betaproteobacteria: Burkholderiales  | MIN | 8.4  | 0.924   | 30 | 5.94   | 0.774     | 0.6  | -0.222 |
| 5.  | <i>Achromobacter viscosus</i>        | Betaproteobacteria: Burkholderiales  | MIN | 35   | 1.544   | 30 | 24.75  | 1.394     | 0.6  | -0.222 |
| 6.  | <i>Achromobacter xerosis</i>         | Betaproteobacteria: Burkholderiales  | MIN | 23   | 1.362   | 30 | 16.26  | 1.211     | 0.5  | -0.301 |
| 7.  | <i>Acidovorax facilis</i>            | Betaproteobacteria: Burkholderiales  | MIN | 7    | 0.845   | 30 | 4.95   | 0.695     | 0.3  | -0.523 |
| 8.  | <i>Acinetobacter baumannii</i>       | Gammaproteobacteria: Pseudomonadales | MIN | 12   | 1.079   | 30 | 8.49   | 0.929     | 2    | 0.301  |
| 9.  | <i>Acinetobacter calcoaceticus</i>   | Gammaproteobacteria: Pseudomonadales | MIN | 6.7  | 0.826   | 30 | 4.74   | 0.676     | 2    | 0.301  |
| 10. | <i>Acinetobacter johnsonii</i>       | Gammaproteobacteria: Pseudomonadales | MIN | 46   | 1.663   | 30 | 32.53  | 1.512     | 2    | 0.301  |
| 11. | <i>Acinetobacter</i> sp.             | Gammaproteobacteria: Pseudomonadales | MIN | 3.3  | 0.519   | 25 | 3.30   | 0.519     | 2    | 0.301  |
| 12. | <i>Acinetobacter</i> sp.             | Gammaproteobacteria: Pseudomonadales | MIN | 6    | 0.778   | 30 | 4.24   | 0.627     | 2    | 0.301  |
| 13. | <i>Acinetobacter</i> sp.             | Gammaproteobacteria: Pseudomonadales | MIN | 8    | 0.903   | 30 | 5.66   | 0.753     | 2    | 0.301  |
| 14. | <i>Aeromonas hydrophila</i>          | Gammaproteobacteria: Aeromonadales   | MIN | 38   | 1.580   | 30 | 26.87  | 1.429     |      |        |
| 15. | <i>Aeromonas veronii</i>             | Gammaproteobacteria: Aeromonadales   | MIN | 20   | 1.301   | 30 | 14.14  | 1.150     |      |        |
| 16. | <i>Agrobacterium tumefaciens</i>     | Alphaproteobacteria: Rhizobiales     | MIN | 20   | 1.301   | 30 | 14.14  | 1.150     | 1.5  | 0.176  |
| 17. | <i>Alcaligenes eutrophus</i>         | Betaproteobacteria: Burkholderiales  | MIN | 83   | 1.919   | 33 | 47.67  | 1.678     | 0.8  | -0.097 |
| 18. | <i>Alcaligenes faecalis</i>          | Betaproteobacteria: Burkholderiales  | MIN | 27   | 1.431   | 30 | 19.09  | 1.281     |      |        |
| 19. | <i>Alcaligenes</i> sp.               | Betaproteobacteria: Burkholderiales  | MIN | 2.1  | 0.322   | 30 | 1.48   | 0.170     |      |        |
| 20. | <i>Aminobacter lissarensis</i>       | Alphaproteobacteria: Rhizobiales     | MIN | 1.6  | 0.204   | 25 | 1.60   | 0.204     | 0.6  | -0.222 |
| 21. | <i>Amoebobacter purpureus</i>        | Gammaproteobacteria: Chromatiales    | MIN | 11   | 1.041   | 30 | 7.78   | 0.891     | 36   | 1.556  |
| 22. | <i>Amoebobacter roseus</i>           | Gammaproteobacteria: Chromatiales    | MIN | 5.4  | 0.732   | 30 | 3.82   | 0.582     | 5    | 0.699  |
| 23. | <i>Amoebobaeter pendens</i>          | Gammaproteobacteria: Chromatiales    | MIN | 8.5  | 0.929   | 30 | 6.01   | 0.779     | 5    | 0.699  |
| 24. | <i>Aquaspirillum itersonii</i>       | Betaproteobacteria: Neisseriales     | MIN | 10   | 1.000   | 30 | 7.07   | 0.849     | 0.9  | -0.046 |
| 25. | <i>Arthrobacter crystallopoietes</i> | Actinobacteria: Actinomycetales      | MIN | 0.2  | -0.699  | 30 | 0.14   | -0.854    | 1.7  | 0.230  |
| 26. | <i>Arthrobacter globiformis</i>      | Actinobacteria: Actinomycetales      | MIN | 8.3  | 0.919   | 30 | 5.87   | 0.769     | 0.5  | -0.301 |
| 27. | <i>Arthrobacter</i> sp.              | Actinobacteria: Actinomycetales      | MIN | 1.2  | 0.079   | 30 | 0.85   | -0.071    | 1.5  | 0.176  |
| 28. | <i>Arthrobacter</i> sp.              | Actinobacteria: Actinomycetales      | MIN | 0.75 | -0.125  | 25 | 0.75   | -0.125    | 0.2  | -0.699 |
| 29. | <i>Arthrobacter</i> sp.              | Actinobacteria: Actinomycetales      | MIN | 6    | 0.778   | 30 | 4.24   | 0.627     |      |        |
| 30. | <i>Arthrobacter</i> sp.              | Actinobacteria: Actinomycetales      | MIN | 14   | 1.146   | 30 | 9.90   | 0.996     |      |        |

|                                         |                                          |     |     |        |    |        |        |      |        |
|-----------------------------------------|------------------------------------------|-----|-----|--------|----|--------|--------|------|--------|
| 31. <i>Azomonas agilis</i> ?            | Gammaproteobacteria: Pseudomonadales     | MIN | 21  | 1.322  | 26 | 19.59  | 1.292  | 13   | 1.114  |
| 32. <i>Azorhizobium caulinodans</i>     | Alphaproteobacteria: Rhizobiales         | MIN | 38  | 1.580  | 30 | 26.87  | 1.429  | 0.5  | -0.301 |
| 33. <i>Azospirillum brasiliense</i>     | Alphaproteobacteria: Rhodospirillales    | MIN | 27  | 1.431  | 37 | 11.75  | 1.070  | 1    | 0.000  |
| 34. <i>Azospirillum lipoferum</i>       | Alphaproteobacteria: Rhodospirillales    | MIN | 39  | 1.591  | 37 | 16.98  | 1.230  | 4    | 0.602  |
| 35. <i>Azotobacter chroococcum</i>      | Gammaproteobacteria: Pseudomonadales     | MIN | 25  | 1.398  | 30 | 17.68  | 1.247  | 14   | 1.146  |
| 36. <i>Azotobacter vinelandii</i>       | Gammaproteobacteria: Pseudomonadales     | MIN | 1.5 | 0.176  | 30 | 1.06   | 0.025  | 0.5  | -0.301 |
| 37. <i>Bacillus cereus</i>              | "Bacilli": Bacillales                    | MIN | 14  | 1.146  | 37 | 6.09   | 0.785  | 3.7  | 0.568  |
| 38. <i>Bacillus firmus</i>              | "Bacilli": Bacillales                    | MIN | 13  | 1.114  | 30 | 9.19   | 0.963  | 0.9  | -0.046 |
| 39. <i>Bacillus megaterium</i>          | "Bacilli": Bacillales                    | MIN | 3.3 | 0.519  | 30 | 2.33   | 0.367  | 7    | 0.845  |
| 40. <i>Bacillus popilliae</i>           | "Bacilli": Bacillales                    | MIN | 0.8 | -0.097 | 30 | 0.57   | -0.244 | 0.8  | -0.097 |
| 41. <i>Bacillus pumilus</i>             | "Bacilli": Bacillales                    | MIN | 5   | 0.699  | 30 | 3.54   | 0.549  | 0.7  | -0.155 |
| 42. <i>Bacillus stearothermophilus</i>  | "Bacilli": Bacillales                    | MIN | 8.2 | 0.914  | 50 | 1.45   | 0.161  | 0.7  | -0.155 |
| 43. <i>Bacillus subtilis</i>            | "Bacilli": Bacillales                    | MIN | 3.3 | 0.519  | 30 | 2.33   | 0.367  | 1.4  | 0.146  |
| 44. <i>Bdellovibrio bacteriovorus</i>   | Deltaproteobacteria: Bdellovibrionales   | MIN | 25  | 1.398  | 30 | 17.68  | 1.247  | 0.3  | -0.523 |
| 45. <i>Beneckea natriegens</i>          | Gammaproteobacteria: "Vibrionales"       | MIN | 265 | 2.423  | 30 | 187.38 | 2.273  | 1.5  | 0.176  |
| 46. <i>Bradyrhizobium japonicum</i>     | Alphaproteobacteria: Rhizobiales         | MIN | 1.0 | 0.000  | 29 | 0.76   | -0.119 | 0.7  | -0.155 |
| 47. <i>Branhamella catarrhalis</i>      | Gammaproteobacteria: Pseudomonadales     | MIN | 1.7 | 0.230  | 37 | 0.74   | -0.131 | 1.3  | 0.114  |
| 48. <i>Brucella melitensis</i>          | Alphaproteobacteria: Rhizobiales         | MIN | 6.5 | 0.813  | 34 | 3.48   | 0.542  | 0.3  | -0.523 |
| 49. <i>Burkholderia</i> sp.             | Betaproteobacteria: Burkholderiales      | MIN | 21  | 1.322  | 30 | 14.85  | 1.172  | 0.7  | -0.155 |
| 50. <i>Cellvibrio gilvus</i>            | Gammaproteobacteria: Pseudomonadales     | MIN | 37  | 1.568  | 30 | 26.16  | 1.418  | 2    | 0.301  |
| 51. <i>Chromatium</i> sp.               | Gammaproteobacteria: Chromatiales        | MIN | 11  | 1.041  | 25 | 11.00  | 1.041  |      |        |
| 52. <i>Chromatium vinosum</i>           | Gammaproteobacteria: Chromatiales        | MIN | 2.2 | 0.342  | 30 | 1.56   | 0.193  | 1.5  | 0.176  |
| 53. <i>Corynebacterium diphtheriae</i>  | Actinobacteria: Actinomycetales          | MIN | 6.7 | 0.826  | 30 | 4.74   | 0.676  |      |        |
| 54. <i>Corynebacterium</i> sp.          | Actinobacteria: Actinomycetales          | MIN | 10  | 1.000  | 30 | 7.07   | 0.849  |      |        |
| 55. <i>Delftia acidovorans</i>          | Betaproteobacteria: Burkholderiales      | MIN | 13  | 1.114  | 30 | 9.19   | 0.963  | 0.8  | -0.097 |
| 56. <i>Desulfovibrio salexigens</i>     | Deltaproteobacteria: Desulfovibrionales  | MIN | 13  | 1.114  | 30 | 9.19   | 0.963  | 1.5  | 0.176  |
| 57. <i>Enterobacter aerogenes</i>       | Gammaproteobacteria: "Enterobacteriales" | MIN | 10  | 1.000  | 30 | 7.07   | 0.849  | 0.3  | -0.523 |
| 58. <i>Enterobacter cloacae</i>         | Gammaproteobacteria: "Enterobacteriales" | MIN | 31  | 1.491  | 30 | 21.92  | 1.341  | 0.9  | -0.046 |
| 59. <i>Enterococcus cecorum</i>         | "Bacilli": "Lactobacillales"             | MIN | 3.8 | 0.580  | 30 | 2.69   | 0.430  | 0.4  | -0.398 |
| 60. <i>Enterococcus faecalis</i>        | "Bacilli": "Lactobacillales"             | MIN | 0.3 | -0.523 | 30 | 0.21   | -0.678 | 0.2  | -0.699 |
| 61. <i>Enterococcus hirae</i>           | "Bacilli": "Lactobacillales"             | MIN | 1.5 | 0.176  | 30 | 1.06   | 0.025  |      |        |
| 62. <i>Enterococcus</i> sp.             | "Bacilli": "Lactobacillales"             | MIN | 33  | 1.519  | 30 | 23.33  | 1.368  | 0.8  | -0.097 |
| 63. <i>Escherichia coli</i>             | Gammaproteobacteria: "Enterobacteriales" | MIN | 32  | 1.505  | 37 | 14     | 1.146  | 0.7  | -0.155 |
| 64. <i>Flavobacterium capsulatum</i>    | Flavobacteria: Flavobacteriales          | MIN | 63  | 1.799  | 30 | 44.55  | 1.649  | 0.3  | -0.523 |
| 65. <i>Francisella tularensis</i>       | Gammaproteobacteria: Thiotrichales       | MIN | 3.7 | 0.568  | 37 | 1.61   | 0.207  | 0.01 | -2.000 |
| 66. <i>Frankia</i> sp.                  | Actinobacteria: Actinomycetales          | MIN | 9   | 0.954  | 25 | 9.00   | 0.954  |      |        |
| 67. <i>Haemophilus influenzae</i>       | Gammaproteobacteria: Pasteurellales      | MIN | 0.5 | -0.301 | 37 | 0.22   | -0.658 | 0.14 | -0.854 |
| 68. <i>Haemophilus parahaemolyticus</i> | Gammaproteobacteria: Pasteurellales      | MIN | 3.5 | 0.544  | 37 | 1.52   | 0.182  |      |        |
| 69. <i>Haemophilus parainfluenzae</i>   | Gammaproteobacteria: Pasteurellales      | MIN | 3.5 | 0.544  | 37 | 1.52   | 0.182  | 0.4  | -0.398 |
| 70. <i>Halobacterium salinarum</i>      | Archaea: Halobacteria: Halobacteriales   | MIN | 17  | 1.230  | 30 | 12.02  | 1.080  | 3.9  | 0.591  |
| 71. <i>Halomonas halodenitrificans</i>  | Gammaproteobacteria: Oceanospirillales   | MIN | 67  | 1.826  | 25 | 67.00  | 1.826  | 0.4  | -0.398 |
| 72. <i>Klebsiella pneumoniae</i>        | Gammaproteobacteria: "Enterobacteriales" | MIN | 3.3 | 0.519  | 30 | 2.33   | 0.367  | 0.4  | -0.398 |
| 73. <i>Lactobacillus brevis</i>         | "Bacilli": "Lactobacillales"             | MIN | 0.2 | -0.699 | 30 | 0.14   | -0.854 | 1.6  | 0.204  |
| 74. <i>Lactobacillus casei</i>          | "Bacilli": "Lactobacillales"             | MIN | 1.7 | 0.230  | 30 | 1.20   | 0.079  |      |        |
| 75. <i>Lactococcus lactis</i>           | "Bacilli": "Lactobacillales"             | MIN | 0.6 | -0.222 | 30 | 0.42   | -0.377 | 0.2  | -0.699 |
| 76. <i>Lactococcus</i> sp.              | "Bacilli": "Lactobacillales"             | MIN | 2.3 | 0.362  | 30 | 1.63   | 0.212  | 0.8  | -0.097 |

|                                     |                                             |     |     |        |    |       |        |      |        |
|-------------------------------------|---------------------------------------------|-----|-----|--------|----|-------|--------|------|--------|
| 77. Legionella pneumophila          | Gammaproteobacteria: Legionellales          | MIN | 20  | 1.301  | 37 | 8.71  | 0.940  | 0.3  | -0.523 |
| 78. Methylobacterium extorquens     | Alphaproteobacteria: Rhizobiales            | MIN | 6   | 0.778  | 30 | 4.24  | 0.627  | 1    | 0.000  |
| 79. Methylococcobium sp.            | Gammaproteobacteria: Methylococcales        | MIN | 11  | 1.041  | 30 | 7.78  | 0.891  | 3    | 0.477  |
| 80. Methylophilus methylotrophus    | Betaproteobacteria: Methylophiliales        | MIN | 1.6 | 0.204  | 40 | 0.57  | -0.244 | 0.15 | -0.824 |
| 81. Methylosinus trichosporium      | Alphaproteobacteria: Rhizobiales            | MIN | 42  | 1.623  | 30 | 29.70 | 1.473  | 1    | 0.000  |
| 82. Micrococcus luteus              | Actinobacteria: Actinomycetales             | MIN | 1.2 | 0.079  | 37 | 0.52  | -0.284 | 1.1  | 0.041  |
| 83. Micrococcus sp.                 | Actinobacteria: Actinomycetales             | MIN | 10  | 1.000  | 30 | 7.07  | 0.849  |      |        |
| 84. Micrococcus sp.                 | Actinobacteria: Actinomycetales             | MIN | 17  | 1.230  | 30 | 12.02 | 1.080  |      |        |
| 85. Moraxella osloensis             | Gammaproteobacteria: Pseudomonadales        | MIN | 13  | 1.114  | 30 | 9.19  | 0.963  | 2.3  | 0.362  |
| 86. Mycobacterium fortuitum         | Actinobacteria: Actinomycetales             | MIN | 17  | 1.230  | 30 | 12.02 | 1.080  |      |        |
| 87. Mycobacterium leprae            | Actinobacteria: Actinomycetales             | MIN | 3.3 | 0.519  | 37 | 1.44  | 0.158  |      |        |
| 88. Mycobacterium lepraemurium      | Actinobacteria: Actinomycetales             | MIN | 3.3 | 0.519  | 37 | 1.44  | 0.158  |      |        |
| 89. Mycobacterium phlei             | Actinobacteria: Actinomycetales             | MIN | 14  | 1.146  | 37 | 6.09  | 0.785  | 0.4  | -0.398 |
| 90. Mycobacterium smegmatis         | Actinobacteria: Actinomycetales             | MIN | 24  | 1.380  | 37 | 10.45 | 1.019  |      |        |
| 91. Mycobacterium tuberculosis      | Actinobacteria: Actinomycetales             | MIN | 2.2 | 0.342  | 37 | 0.96  | -0.018 | 0.2  | -0.699 |
| 92. Myxococcus xanthus              | Deltaproteobacteria: Myxococcales           | MIN | 4.6 | 0.663  | 30 | 3.25  | 0.512  | 1    | 0.000  |
| 93. Neisseria elongata              | Betaproteobacteria: Neisseriales            | MIN | 8.3 | 0.919  | 30 | 5.87  | 0.769  | 0.2  | -0.699 |
| 94. Neisseria flava                 | Betaproteobacteria: Neisseriales            | MIN | 12  | 1.079  | 30 | 8.49  | 0.929  | 0.2  | -0.699 |
| 95. Neisseria gonorrhoeae           | Betaproteobacteria: Neisseriales            | MIN | 0.6 | -0.222 | 37 | 0.26  | -0.585 | 0.2  | -0.699 |
| 96. Neisseria mucosa                | Betaproteobacteria: Neisseriales            | MIN | 15  | 1.176  | 30 | 10.61 | 1.026  | 0.2  | -0.699 |
| 97. Neisseria sicca                 | Betaproteobacteria: Neisseriales            | MIN | 13  | 1.114  | 30 | 9.19  | 0.963  | 0.2  | -0.699 |
| 98. Nitrobacter winogradskyi        | Alphaproteobacteria: Rhizobiales            | MIN | 10  | 1.000  | 30 | 7.07  | 0.849  | 0.24 | -0.620 |
| 99. Nitrosomonas europaea           | Betaproteobacteria: Nitrosomonadales        | MIN | 11  | 1.041  | 25 | 11.00 | 1.041  | 0.6  | -0.222 |
| 100. Nocardia corallina             | Actinobacteria: Actinomycetales             | MIN | 1.7 | 0.230  | 30 | 1.20  | 0.079  | 2.1  | 0.322  |
| 101. Nocardia farcinica             | Actinobacteria: Actinomycetales             | MIN | 8.3 | 0.919  | 30 | 5.87  | 0.769  | 0.1  | -1.000 |
| 102. Nocardia sp.                   | Actinobacteria: Actinomycetales             | MIN | 2.2 | 0.342  | 30 | 1.56  | 0.193  |      |        |
| 103. Nocardia sp.                   | Actinobacteria: Actinomycetales             | MIN | 3   | 0.477  | 30 | 2.12  | 0.326  |      |        |
| 104. Nonomuraea sp.                 | Actinobacteria: Actinomycetales             | MIN | 1   | 0.000  | 25 | 1.00  | 0.000  |      |        |
| 105. Paracoccus denitrificans       | Alphaproteobacteria: Rhodobacterales        | MIN | 8.3 | 0.919  | 30 | 5.87  | 0.769  | 0.16 | -0.796 |
| 106. Pasteurella pseudotuberculosis | Gammaproteobacteria: Enterobacteriales      | MIN | 12  | 1.079  | 25 | 12.00 | 1.079  |      |        |
| 107. Pediococcus acidilactici       | "Bacilli": "Lactobacillales"                | MIN | 3.3 | 0.519  | 30 | 2.33  | 0.367  | 2.2  | 0.342  |
| 108. Phaeospirillum fulvum          | Alphaproteobacteria: Rhodospirillales       | MIN | 28  | 1.447  | 28 | 22.74 | 1.357  | 2    | 0.301  |
| 109. Picophilus oshimae             | Thermoplasmata (Archaea): Thermoplasmatales | MIN | 25  | 1.398  | 60 | 2.21  | 0.344  | 1    | 0.000  |
| 110. Proteus morgani                | Gammaproteobacteria: "Enterobacteriales"    | MIN | 5   | 0.699  | 30 | 3.54  | 0.549  | 0.4  | -0.398 |
| 111. Proteus vulgaris               | Gammaproteobacteria: "Enterobacteriales"    | MIN | 5   | 0.699  | 37 | 2.18  | 0.338  | 0.4  | -0.398 |
| 112. Pseudomonas aeruginosa         | Gammaproteobacteria: Pseudomonadales        | MIN | 6.7 | 0.826  | 30 | 4.74  | 0.676  | 0.5  | -0.301 |
| 113. Pseudomonas fluorescens        | Gammaproteobacteria: Pseudomonadales        | MIN | 4.4 | 0.643  | 28 | 3.57  | 0.553  | 1    | 0.000  |
| 114. Pseudomonas formicans          | Gammaproteobacteria: Pseudomonadales        | MIN | 10  | 1.000  | 30 | 7.07  | 0.849  | 7    | 0.845  |
| 115. Pseudomonas oleovorans         | Gammaproteobacteria: Pseudomonadales        | MIN | 3.3 | 0.519  | 30 | 2.33  | 0.367  | 0.16 | -0.796 |
| 116. Pseudomonas putida             | Gammaproteobacteria: Pseudomonadales        | MIN | 1   | 0.000  | 30 | 0.71  | -0.149 | 1.7  | 0.230  |
| 117. Pseudomonas saccharophila      | Gammaproteobacteria: Pseudomonadales        | MIN | 33  | 1.519  | 30 | 23.33 | 1.368  |      |        |
| 118. Pseudomonas sp.                | Gammaproteobacteria: Pseudomonadales        | MIN | 2.2 | 0.342  | 30 | 1.56  | 0.193  |      |        |
| 119. Pseudomonas sp.                | Gammaproteobacteria: Pseudomonadales        | MIN | 8   | 0.903  | 30 | 5.66  | 0.753  |      |        |
| 120. Pseudomonas sp.                | Gammaproteobacteria: Pseudomonadales        | MIN | 3.3 | 0.519  | 25 | 3.30  | 0.519  |      |        |
| 121. Pseudomonas sp.                | Gammaproteobacteria: Pseudomonadales        | MIN | 8.3 | 0.919  | 30 | 5.87  | 0.769  |      |        |
| 122. Pseudomonas sp.                | Gammaproteobacteria: Pseudomonadales        | MIN | 15  | 1.176  | 30 | 10.61 | 1.026  |      |        |

|                                          |                                                     |     |     |        |    |       |        |      |        |
|------------------------------------------|-----------------------------------------------------|-----|-----|--------|----|-------|--------|------|--------|
| 123. <i>Pseudomonas</i> sp.              | Gammaproteobacteria: Pseudomonadales                | MIN | 18  | 1.255  | 30 | 12.73 | 1.105  |      |        |
| 124. <i>Pseudomonas</i> sp.              | Gammaproteobacteria: Pseudomonadales                | MIN | 35  | 1.544  | 20 | 49.50 | 1.695  |      |        |
| 125. <i>Pseudomonas</i> sp.              | Gammaproteobacteria: Pseudomonadales                | MIN | 17  | 1.230  | 30 | 12.02 | 1.080  |      |        |
| 126. <i>Pseudonocardia nitrificans</i>   | Actinobacteria: Actinomycetes                       | MIN | 2.5 | 0.398  | 30 | 1.77  | 0.248  |      |        |
| 127. <i>Rhizobium japonicum</i>          | Alphaproteobacteria: Rhizobiales                    | MIN | 16  | 1.204  | 23 | 18.38 | 1.264  | 0.7  | -0.155 |
| 128. <i>Rhizobium leguminosarum</i>      | Alphaproteobacteria: Rhizobiales                    | MIN | 9.5 | 0.978  | 30 | 6.72  | 0.827  | 0.6  | -0.222 |
| 129. <i>Rhizobium meliloti</i>           | Alphaproteobacteria: Rhizobiales                    | MIN | 12  | 1.079  | 30 | 8.49  | 0.929  | 0.7  | -0.155 |
| 130. <i>Rhodobacter sphaeroides</i>      | Alphaproteobacteria: Rhodobacterales                | MIN | 17  | 1.230  | 28 | 13.81 | 1.140  | 0.8  | -0.097 |
| 131. <i>Rhodococcus rhodochrous</i>      | Actinobacteria: Actinomycetales                     | MIN | 17  | 1.230  | 30 | 12.02 | 1.080  |      |        |
| 132. <i>Rhodococcus</i> sp.              | Actinobacteria: Actinomycetales                     | MIN | 2.2 | 0.342  | 25 | 2.20  | 0.342  |      |        |
| 133. <i>Rhodococcus</i> sp.              | Actinobacteria: Actinomycetales                     | MIN | 7   | 0.845  | 30 | 4.95  | 0.695  |      |        |
| 134. <i>Rhodococcus</i> sp.              | Actinobacteria: Actinomycetales                     | MIN | 7.4 | 0.869  | 25 | 7.40  | 0.869  |      |        |
| 135. <i>Rhodospirillum rubrum</i>        | Alphaproteobacteria: Rhodospirillales               | MIN | 3.8 | 0.580  | 28 | 3.09  | 0.490  | 9    | 0.954  |
| 136. <i>Sallinivibrio costicola</i>      | Gammaproteobacteria: "Vibrionales"                  | MIN | 7   | 0.845  | 25 | 7.00  | 0.845  | 0.4  | -0.398 |
| 137. <i>Salmonella typhimurium</i>       | Gammaproteobacteria: "Enterobacteriales"            | MIN | 15  | 1.176  | 37 | 6.53  | 0.815  | 0.66 | -0.180 |
| 138. <i>Serratia marcescens</i>          | Gammaproteobacteria: "Enterobacteriales"            | MIN | 4   | 0.602  | 37 | 1.74  | 0.241  | 0.4  | -0.398 |
| 139. <i>Shigella flexneri</i>            | Gammaproteobacteria: "Enterobacteriales"            | MIN | 10  | 1.000  | 37 | 4.35  | 0.638  |      |        |
| 140. <i>Sphaerotilus natans</i>          | Betaproteobacteria: Burkholderiales                 | MIN | 45  | 1.653  | 28 | 36.55 | 1.563  | 6.5  | 0.813  |
| 141. <i>Sporosarcina ureae</i>           | "Bacilli": Bacillales                               | MIN | 12  | 1.079  | 30 | 8.49  | 0.929  | 3.8  | 0.580  |
| 142. <i>Staphylococcus aureus</i>        | "Bacilli": Bacillales                               | MIN | 16  | 1.204  | 37 | 7     | 0.845  | 0.27 | -0.569 |
| 143. <i>Staphylococcus epidermidis</i>   | "Bacilli": Bacillales                               | MIN | 27  | 1.431  | 30 | 19.09 | 1.281  | 0.5  | -0.301 |
| 144. <i>Staphylococcus simulans</i>      | "Bacilli": Bacillales                               | MIN | 10  | 1.000  | 37 | 4.35  | 0.638  |      |        |
| 145. <i>Staphylococcus</i> sp.           | "Bacilli": Bacillales                               | MIN | 17  | 1.230  | 30 | 12.02 | 1.080  |      |        |
| 146. <i>Streptococcus agalactiae</i>     | "Bacilli": "Lactobacillales"                        | MIN | 1.7 | 0.230  | 37 | 0.74  | -0.131 | 0.3  | -0.523 |
| 147. <i>Streptococcus pneumoniae</i>     | "Bacilli": "Lactobacillales"                        | MIN | 1.7 | 0.230  | 30 | 1.20  | 0.079  | 0.4  | -0.398 |
| 148. <i>Streptococcus pyogenes</i>       | "Bacilli": "Lactobacillales"                        | MIN | 3.3 | 0.519  | 30 | 2.33  | 0.367  | 0.2  | -0.699 |
| 149. <i>Streptomyces coelicolor</i>      | Actinobacteria: Actinomycetales                     | MIN | 40  | 1.602  | 30 | 28.28 | 1.451  |      |        |
| 150. <i>Streptomyces fradiae</i>         | Actinobacteria: Actinomycetales                     | MIN | 22  | 1.342  | 30 | 15.56 | 1.192  |      |        |
| 151. <i>Streptomyces griseus</i>         | Actinobacteria: Actinomycetales                     | MIN | 18  | 1.255  | 30 | 12.73 | 1.105  |      |        |
| 152. <i>Streptomyces longispororuber</i> | Actinobacteria: Actinomycetales                     | MIN | 3.3 | 0.519  | 30 | 2.33  | 0.367  |      |        |
| 153. <i>Streptomyces olivaceus</i>       | Actinobacteria: Actinomycetales                     | MIN | 9   | 0.954  | 37 | 3.92  | 0.593  |      |        |
| 154. <i>Sulfolobus acidocaldareus</i>    | Archaea: Thermoprotei (Crenarchaeota): Sulfolobales | MIN | 15  | 1.176  | 60 | 1.33  | 0.124  | 0.4  | -0.398 |
| 155. <i>Taylorella equigenitalis</i>     | Betaproteobacteria: Burkholderiales                 | MIN | 0.1 | -1.000 | 30 | 0.07  | -1.155 | 0.4  | -0.398 |
| 156. <i>Thiobacillus ferrooxidans</i>    | Betaproteobacteria: Hydrogenophilales               | MIN | 0.5 | -0.301 | 25 | 0.50  | -0.301 | 0.25 | -0.602 |
| 157. <i>Thiobacillus intermedius</i>     | Betaproteobacteria: Hydrogenophilales               | MIN | 11  | 1.041  | 30 | 7.78  | 0.891  | 0.4  | -0.398 |
| 158. <i>Thiobacillus thiooxidans</i>     | Betaproteobacteria: Hydrogenophilales               | MIN | 1.5 | 0.176  | 28 | 1.22  | 0.086  | 0.25 | -0.602 |
| 159. <i>Thiocapsa roseopersicina</i>     | Gammaproteobacteria: Chromatiales                   | MIN | 5.6 | 0.748  | 30 | 3.96  | 0.598  | 1    | 0.000  |
| 160. <i>Thiocystis violacea</i>          | Gammaproteobacteria: Chromatiales                   | MIN | 2.5 | 0.398  | 30 | 1.77  | 0.248  | 11   | 1.041  |
| 161. <i>Thiorhodovibrio winogradskyi</i> | Gammaproteobacteria: Chromatiales                   | MIN | 6.6 | 0.820  | 30 | 4.67  | 0.669  |      |        |
| 162. Unidentified bacterium              | Gammaproteobacteria: Pseudomonadales                | MIN | 11  | 1.041  | 30 | 7.78  | 0.891  | 0.6  | -0.222 |
| 163. Unknown                             | Unknown                                             | MIN | 6.7 | 0.826  | 30 | 4.74  | 0.676  |      |        |
| 164. Unknown                             | Unknown                                             | MIN | 30  | 1.477  | 30 | 21.21 | 1.327  |      |        |
| 165. Unnamed rhizobiaceae                | Alphaproteobacteria: Rhizobiales                    | MIN | 42  | 1.623  | 25 | 42.00 | 1.623  |      |        |
| 166. <i>Vibrio alginolyticus</i>         | Gammaproteobacteria: "Vibrionales"                  | MIN | 3.3 | 0.519  | 30 | 2.33  | 0.367  | 0.6  | -0.222 |
| 167. <i>Vibrio fischeri</i>              | Gammaproteobacteria: "Vibrionales"                  | MIN | 22  | 1.342  | 20 | 31.11 | 1.493  | 0.6  | -0.222 |
| 168. <i>Vibrio metschnikovii</i>         | Gammaproteobacteria: "Vibrionales"                  | MIN | 3.3 | 0.519  | 30 | 2.33  | 0.367  | 0.6  | -0.222 |

|                                      |                                        |     |      |        |    |       |        |      |        |
|--------------------------------------|----------------------------------------|-----|------|--------|----|-------|--------|------|--------|
| 169. <i>Vibrio parahaemolyticus</i>  | Gammaproteobacteria: "Vibrionales"     | MIN | 1.7  | 0.230  | 30 | 1.20  | 0.079  | 0.6  | -0.222 |
| 170. <i>Vibrio</i> sp.               | Gammaproteobacteria: "Vibrionales"     | MIN | 0.11 | -0.959 | 5  | 0.44  | -0.357 | 0.14 | -0.854 |
| 171. <i>Vitreoscilla stercoraria</i> | Betaproteobacteria: Neisseriales       | MIN | 35   | 1.544  | 30 | 24.75 | 1.394  |      |        |
| 172. <i>Xanthomonas axonopodis</i>   | Gammaproteobacteria: Xanthomonadales   | MIN | 37   | 1.568  | 30 | 26.16 | 1.418  | 0.25 | -0.602 |
| 173. <i>Yersinia pestis</i>          | Gammaproteobacteria: Enterobacteriales | MIN | 4.8  | 0.681  | 28 | 3.90  | 0.591  | 0.55 | -0.260 |

---
