# Supplementary material
Source: PubMed Central journal article supplement (PMC2579366)
Supplement: 0802148105_DS2_PDF.pdf [file 0802148105_DS2_PDF.pdf]

## Dataset S2. Endogenous respiration rates in heterotrophic protozoa

### Notes to Table S2a:

Data on endogenous respiration in heterotrophic protozoa mostly come from the compilation of Vladimirova & Zotin (1985). The data base for that work (Vladimirova & Zotin 1983, hereafter VZ83) is deposited at the All-Russian Institute of Scientific and Technological Information and was ordered from there. The data base contains more than 550 data entries for over 100 species (growing and starved cultures), of which 193 values of respiration in the absence of substrates (endogenous respiration) are presented below. Additionally, eight data entries were obtained from other sources (Ryley 1955a; Fenchel & Finlay 1983; Crawford et al. 1994). These data are presented in the end of the table with Source indicated as "other" and reference provided in the "**Reference**" column. Otherwise "**Source**" gives the original number of reference in the data base of Vladimirova & Zotin (1985); "**Reference**" is that reference itself; "**Culture age, stage or state**" gives literal translation of Vladimirova & Zotin's (1985) comments on data entries and/or relevant comments of other authors. Note that "Taxonomic group" is determined from various sources; this table should **not** be considered as an authoritative representation of protozoan complicated taxonomy.

"**Original units**" are the units of endogenous respiration rate measurements as given in the original publication (VZ83 or other); **qou** is the numeric value of endogenous respiration rate in the original units. In VZ83 data base all data are reported in ml oxygen consumed by  $10^9$  cells per hour, cell mass is simultaneously provided (column "**Mpg**").

**qou** is the numeric value of endogenous respiration rate in the original units.

**qWkg** is the original endogenous respiration rate **qou** converted to  $W$  (kg WM)<sup>-1</sup> (Watts per kg wet mass). For the data of VZ83, **qWkg** =  $(\text{qou} / \text{Mpg}) \times (20 \text{ J/ml O}_2) \times 10^6 / (3600 \text{ s}) W$  (kg WM)<sup>-1</sup>.

**Mpg**: cell mass, pg (1 pg =  $10^{-12}$  g). Where **Mpg** value is in brackets, it was characterized in VZ83 as "mean for the species" and apparently determined from different sources than the source of respiration rate. The same with the data of Fenchel & Finlay (1983). However, this should not bias the mass-specific metabolic rate value, because, as pointed out by VZ83, normally metabolic rates in unicells are reported on a mass-specific basis, so dividing **qou** by **Mpg** (irrespective of how the latter is determined) is equivalent to retrieving the original mass-specific value. Notably, independent analyses of protozoan metabolic rates by Fenchel & Finlay (1983) and Vladimirova & Zotin (1985) yielded similar results with respect to the mean mass-specific metabolic rate, as analysed by Makarieva et al. (2005).

**TC**: temperature in degrees Celsius. All data in VZ83 correspond to 20 °C, so TC = 20 is shown everywhere in the "**TC**" column.

For each species, the minimum qWkg value was chosen and converted to 25 °C. Data used in the analyses presented in Table 1 and Figures 1-3 in the paper are, for convenience, compiled below in a separate Table S2b.

Table S2a. Endogenous respiration rates in heterotrophic Protozoa.

| 1. Taxonomic group   | Species                               | Original units                                                           | qou   | qWkg | Mpg      | TC | Culture age, stage or state | Source | Reference                    |
|----------------------|---------------------------------------|--------------------------------------------------------------------------|-------|------|----------|----|-----------------------------|--------|------------------------------|
| 2. Acanthamoebidae   | Acanthamoeba (Hartmanella) castellani | ml O <sub>2</sub> (10 <sup>9</sup> cells) <sup>-1</sup> hr <sup>-1</sup> | 2.69  | 11.2 | 1340     | 20 | Log                         | 114    | Griffiths & Hughes 1968      |
| 3. Acanthamoebidae   | Acanthamoeba (Hartmanella) castellani | ml O <sub>2</sub> (10 <sup>9</sup> cells) <sup>-1</sup> hr <sup>-1</sup> | 33.7  | 28.2 | [6700]   | 20 | Log                         | 297    | Waidyasekera & Kitching 1975 |
| 4. Acanthamoebidae   | Acanthamoeba (Hartmanella) castellani | ml O <sub>2</sub> (10 <sup>9</sup> cells) <sup>-1</sup> hr <sup>-1</sup> | 5.8   | 4.8  | [6700]   | 20 | Log                         | 86     | Edwards & Lloyd 1977a        |
| 5. Acanthamoebidae   | Acanthamoeba (Hartmanella) castellani | ml O <sub>2</sub> (10 <sup>9</sup> cells) <sup>-1</sup> hr <sup>-1</sup> | 9.93  | 8.3  | [6700]   | 20 | Stationary                  | 86     | Edwards & Lloyd 1977a        |
| 6. Acanthamoebidae   | Acanthamoeba (Hartmanella) castellani | ml O <sub>2</sub> (10 <sup>9</sup> cells) <sup>-1</sup> hr <sup>-1</sup> | 4.53  | 3.8  | [6700]   | 20 | Log                         | 87     | Edwards & Lloyd 1977b        |
| 7. Acanthamoebidae   | Acanthamoeba sp.                      | ml O <sub>2</sub> (10 <sup>9</sup> cells) <sup>-1</sup> hr <sup>-1</sup> | 4.08  | 5.3  | 4320     | 20 |                             | 210    | Neff et al. 1958             |
| 8. Actinophryidae    | Actinosphaerium eichhornii            | ml O <sub>2</sub> (10 <sup>9</sup> cells) <sup>-1</sup> hr <sup>-1</sup> | 1037  | 0.4  | 14561000 | 20 |                             | 135    | Howland & Bernstein 1931     |
| 9. Amoebae           | Amoeba proteus                        | nl O <sub>2</sub> (cell) <sup>-1</sup> hr <sup>-1</sup>                  | 0.248 | 1.5  | [936000] | 20 | starved 2 d                 | OTHER  | Fenchel & Finlay 1983        |
| 10. Amoebae          | Amoeba proteus                        | nl O <sub>2</sub> (cell) <sup>-1</sup> hr <sup>-1</sup>                  | 0.450 | 1    | 900000   | 20 | starved 2-4 d               | OTHER  | Fenchel & Finlay 1983        |
| 11. Euglenida        | Astasia klebsii                       | ml O <sub>2</sub> (10 <sup>9</sup> cells) <sup>-1</sup> hr <sup>-1</sup> | 2.4   | 3.5  | [3800]   | 20 | Log                         | 291    | von Dach 1942                |
| 12. Euglenida        | Astasia klebsii                       | ml O <sub>2</sub> (10 <sup>9</sup> cells) <sup>-1</sup> hr <sup>-1</sup> | 1.2   | 1.8  | [3800]   | 20 | Stationary                  | 291    | von Dach 1942                |
| 13. Euglenida        | Astasia klebsii                       | ml O <sub>2</sub> (10 <sup>9</sup> cells) <sup>-1</sup> hr <sup>-1</sup> | 22    | 1.8  | [3800]   | 20 | Log                         | 292    | von Dach 1950                |
| 14. Euglenida        | Astasia longa                         | ml O <sub>2</sub> (10 <sup>9</sup> cells) <sup>-1</sup> hr <sup>-1</sup> | 2206  | 9.4  | 13500    | 20 | Synchronized                | 223    | Padilla 1960                 |
| 15. Euglenida        | Astasia longa                         | ml O <sub>2</sub> (10 <sup>9</sup> cells) <sup>-1</sup> hr <sup>-1</sup> | 22.7  | 20   | 6400     | 20 |                             | 224    | Padilla & James 1960         |
| 16. Euglenida        | Astasia longa                         | ml O <sub>2</sub> (10 <sup>9</sup> cells) <sup>-1</sup> hr <sup>-1</sup> | 3.8   | 4.4  | 4800     | 20 | Log                         | 139    | Hunter & Lee 1962            |
| 17. Euglenida        | Astasia longa                         | ml O <sub>2</sub> (10 <sup>9</sup> cells) <sup>-1</sup> hr <sup>-1</sup> | 6.0   | 4.9  | 6900     | 20 | Log                         | 305    | Wilson 1963                  |
| 18. Euglenida        | Astasia longa                         | ml O <sub>2</sub> (10 <sup>9</sup> cells) <sup>-1</sup> hr <sup>-1</sup> | 4.1   | 3.8  | 6000     | 20 | Log                         | 306    | Wilson & James 1963          |
| 19. Euglenida        | Astasia longa                         | ml O <sub>2</sub> (10 <sup>9</sup> cells) <sup>-1</sup> hr <sup>-1</sup> | 7.1   | 2.9  | 13500    | 20 | Synchronized                | 306    | Wilson & James 1963          |
| 20. Ciliophora       | Bresslaua insidiatrix                 | ml O <sub>2</sub> (10 <sup>9</sup> cells) <sup>-1</sup> hr <sup>-1</sup> | 111   | 23.9 | 26000    | 20 | Active                      | 252    | Scholander et al. 1952       |
| 21. Ciliophora       | Bresslaua insidiatrix                 | ml O <sub>2</sub> (10 <sup>9</sup> cells) <sup>-1</sup> hr <sup>-1</sup> | 66    | 21.7 | 17000    | 20 | Cysts                       | 252    | Scholander et al. 1952       |
| 22. Amoebidae        | Chaos chaos                           | ml O <sub>2</sub> (10 <sup>9</sup> cells) <sup>-1</sup> hr <sup>-1</sup> | 17250 | 1.3  | 73870000 | 20 | 1 day starvation            | 133    | Holter & Zeuthen 1948        |
| 23. Amoebidae        | Chaos chaos                           | ml O <sub>2</sub> (10 <sup>9</sup> cells) <sup>-1</sup> hr <sup>-1</sup> | 15596 | 1.7  | 50000000 | 20 | 4-5 days starvation         | 132    | Holter 1950                  |
| 24. Amoebidae        | Chaos chaos                           | ml O <sub>2</sub> (10 <sup>9</sup> cells) <sup>-1</sup> hr <sup>-1</sup> | 2297  | 1.3  | 9644000  | 20 |                             | 252    | Scholander et al. 1952       |
| 25. Amoebidae        | Chaos chaos                           | ml O <sub>2</sub> (10 <sup>9</sup> cells) <sup>-1</sup> hr <sup>-1</sup> | 6772  | 0.8  | 50000000 | 20 |                             | 22     | Albritton 1955               |
| 26. Cryptophyta      | Chilomonas paramecium                 | ml O <sub>2</sub> (10 <sup>9</sup> cells) <sup>-1</sup> hr <sup>-1</sup> | 6.4   | 16   | 2260     | 20 | 48 hr                       | 191    | Mast et al. 1936             |
| 27. Cryptophyta      | Chilomonas paramecium                 | ml O <sub>2</sub> (10 <sup>9</sup> cells) <sup>-1</sup> hr <sup>-1</sup> | 27.5  | 84   | 1840     | 20 | Log                         | 142    | Hutchens et al. 1948         |
| 28. Cryptophyta      | Chilomonas paramecium                 | ml O <sub>2</sub> (10 <sup>9</sup> cells) <sup>-1</sup> hr <sup>-1</sup> | 24.4  | 61   | [2260]   | 20 |                             | 134    | Holz 1954                    |
| 29. Ciliophora       | Coleps hirtus                         | ml O <sub>2</sub> (10 <sup>9</sup> cells) <sup>-1</sup> hr <sup>-1</sup> | 68    | 4.2  | 91000    | 20 | 24 hr starvation            | 250    | Sarojini & Nagabhusanam 1966 |
| 30. Ciliophora       | Colpidium campylum                    | ml O <sub>2</sub> (10 <sup>9</sup> cells) <sup>-1</sup> hr <sup>-1</sup> | 104.5 | 10.8 | [54400]  | 20 | 48 hr                       | 230    | Pitts 1932                   |
| 31. Trypanosomatidae | Crithida (Strigomonas) fasciculata    | ml O <sub>2</sub> (10 <sup>9</sup> cells) <sup>-1</sup> hr <sup>-1</sup> | 2.90  | 7.8  | [2078]   | 20 |                             | 138    | Hunter & Cosgrove 1956       |

|                      |                                    |                                                                          |           |      |           |    |                         |         |                                                                                  |
|----------------------|------------------------------------|--------------------------------------------------------------------------|-----------|------|-----------|----|-------------------------|---------|----------------------------------------------------------------------------------|
| 32. Trypanosomatidae | Crithida (Strigomonas) fasciculata | ml O <sub>2</sub> (10 <sup>9</sup> cells) <sup>-1</sup> hr <sup>-1</sup> | 2.96      | 8.0  | [2078]    | 20 | Log                     | 70      | Cosgrove 1959                                                                    |
| 33. Trypanosomatidae | Crithida (Strigomonas) fasciculata | ml O <sub>2</sub> (10 <sup>9</sup> cells) <sup>-1</sup> hr <sup>-1</sup> | 2.72      | 7.3  | [2078]    | 20 | 44-48 hr                | 137     | Hunter 1960                                                                      |
| 34. Trypanosomatidae | Crithidia (Strigomonas) oncopelti  | μl O <sub>2</sub> (mg dry mass) <sup>-1</sup> hr <sup>-1</sup>           | 12.4      | 10   | [30]      | 30 |                         | OTHER   | Ryley 1955a; [cell mass data: Holwill 1965, cylinder or pear shaped, 8.2×2.6 μm] |
| 35. Dictyosteliida   | Dictyostelium discodeum            | ml O <sub>2</sub> (10 <sup>9</sup> cells) <sup>-1</sup> hr <sup>-1</sup> | 0.74      | 4.9  | 840       | 20 | Amoebaform              | 112     | Gregg 1950                                                                       |
| 36. Dictyosteliida   | Dictyostelium discodeum            | ml O <sub>2</sub> (10 <sup>9</sup> cells) <sup>-1</sup> hr <sup>-1</sup> | 1.33      | 7.6  | 980       | 20 | Migration               | 112     | Gregg 1950                                                                       |
| 37. Dictyosteliida   | Dictyostelium discodeum            | ml O <sub>2</sub> (10 <sup>9</sup> cells) <sup>-1</sup> hr <sup>-1</sup> | 0.80      | 7.7  | 580       | 20 | Beginning of cumulation | 112     | Gregg 1950                                                                       |
| 38. Dictyosteliida   | Dictyostelium discodeum            | ml O <sub>2</sub> (10 <sup>9</sup> cells) <sup>-1</sup> hr <sup>-1</sup> | 0.83      | 9.5  | 490       | 20 | Amoeba form             | 169,310 | Liddel & Wright 1961; Wright 1964                                                |
| 39. Dictyosteliida   | Dictyostelium discodeum            | ml O <sub>2</sub> (10 <sup>9</sup> cells) <sup>-1</sup> hr <sup>-1</sup> | 0.48      | 6.9  | 390       | 20 | Amoeba migration        | 169,310 | Liddel & Wright 1961; Wright 1964                                                |
| 40. Dictyosteliida   | Dictyostelium discodeum            | ml O <sub>2</sub> (10 <sup>9</sup> cells) <sup>-1</sup> hr <sup>-1</sup> | 0.42      | 7.6  | 310       | 20 | Precumulation           | 169,310 | Liddel & Wright 1961; Wright 1964                                                |
| 41. Apicomplexa      | Eimeria acervulina                 | ml O <sub>2</sub> (10 <sup>9</sup> cells) <sup>-1</sup> hr <sup>-1</sup> | 0.40-1.52 | 2.0  | 2640      | 20 | Sporulation             | 307     | Wilson P. 1961                                                                   |
| 42. Apicomplexa      | Eimeria stiedae                    | ml O <sub>2</sub> (10 <sup>9</sup> cells) <sup>-1</sup> hr <sup>-1</sup> | 3.53      | 2.5  | [7980]    | 20 | Sporulation             | 296     | Wagenbach & Burns 1969                                                           |
| 43. Apicomplexa      | Eimeria tenella                    | ml O <sub>2</sub> (10 <sup>9</sup> cells) <sup>-1</sup> hr <sup>-1</sup> | 6.43      | 7.2  | [5010]    | 20 | Non-sporulating oocysts | 262     | Smith & Herrick 1944                                                             |
| 44. Apicomplexa      | Eimeria tenella                    | ml O <sub>2</sub> (10 <sup>9</sup> cells) <sup>-1</sup> hr <sup>-1</sup> | 2.22      | 2.3  | 5440      | 20 | Sporulation             | 296     | Wagenbach & Burns 1969                                                           |
| 45. Trypanosomatidae | Endotrypanum schaudinni            | ml O <sub>2</sub> (10 <sup>9</sup> cells) <sup>-1</sup> hr <sup>-1</sup> | 0.019     | 0.93 | [114]     | 20 | Log                     | 312     | Zeledon 1960a                                                                    |
| 46. Trypanosomatidae | Endotrypanum schaudinni            | ml O <sub>2</sub> (10 <sup>9</sup> cells) <sup>-1</sup> hr <sup>-1</sup> | 0.017     | 0.84 | [114]     | 20 | Log                     | 313     | Zeledon 1960b                                                                    |
| 47. Trypanosomatidae | Endotrypanum schaudinni            | ml O <sub>2</sub> (10 <sup>9</sup> cells) <sup>-1</sup> hr <sup>-1</sup> | 0.020     | 1.0  | [114]     | 20 | Log                     | 314     | Zeledon 1960c                                                                    |
| 48. Trypanosomatidae | Endotrypanum schaudinni            | ml O <sub>2</sub> (10 <sup>9</sup> cells) <sup>-1</sup> hr <sup>-1</sup> | 0.018     | 0.88 | [114]     | 20 | Log                     | 315     | Zeledon 1960d                                                                    |
| 49. Entamoebidae     | Entamoeba histolytica              | ml O <sub>2</sub> (10 <sup>9</sup> cells) <sup>-1</sup> hr <sup>-1</sup> | 1.01      | 0.7  | [8600]    | 20 |                         | 202     | Montalvo et al. 1971                                                             |
| 50. Entamoebidae     | Entamoeba histolytica              | ml O <sub>2</sub> (10 <sup>9</sup> cells) <sup>-1</sup> hr <sup>-1</sup> | 1.20      | 0.4  | [8600]    | 20 |                         | 235     | Reeves 1971                                                                      |
| 51. Entamoebidae     | Entamoeba histolytica              | ml O <sub>2</sub> (10 <sup>9</sup> cells) <sup>-1</sup> hr <sup>-1</sup> | 3.32      | 1.3  | 13900     | 20 |                         | 299     | Weinbach & Diamond 1974                                                          |
| 52. Ciliophora       | Frontonia leucas                   | ml O <sub>2</sub> (10 <sup>9</sup> cells) <sup>-1</sup> hr <sup>-1</sup> | 49        | 0.4  | 745000    | 20 |                         | 158     | Laybourn & Finlay 1976                                                           |
| 53. Trypanosomatidae | Leishmania brasiliensis            | ml O <sub>2</sub> (10 <sup>9</sup> cells) <sup>-1</sup> hr <sup>-1</sup> | 0.076     | 33   | 13        | 20 | Log                     | 79      | de Monge & Zeledon 1963                                                          |
| 54. Trypanosomatidae | Leishmania brasiliensis            | ml O <sub>2</sub> (10 <sup>9</sup> cells) <sup>-1</sup> hr <sup>-1</sup> | 0.076     | 33   | 13        | 20 | Log                     | 316     | Zeledon & de Monge 1966                                                          |
| 55. Trypanosomatidae | Leishmania brasiliensis            | ml O <sub>2</sub> (10 <sup>9</sup> cells) <sup>-1</sup> hr <sup>-1</sup> | 0.032     | 22   | 8         | 20 | Log                     | 316     | Zeledon & de Monge 1966                                                          |
| 56. Trypanosomatidae | Leishmania brasiliensis            | ml O <sub>2</sub> (10 <sup>9</sup> cells) <sup>-1</sup> hr <sup>-1</sup> | 0.074     | 59   | 13        | 20 | Log                     | 317     | Zeledon & de Monge 1967                                                          |
| 57. Trypanosomatidae | Leishmania brasiliensis            | ml O <sub>2</sub> (10 <sup>9</sup> cells) <sup>-1</sup> hr <sup>-1</sup> | 0.028     | 22   | 7         | 20 | Log                     | 317     | Zeledon & de Monge 1967                                                          |
| 58. Trypanosomatidae | Leishmania brasiliensis            | ml O <sub>2</sub> (10 <sup>9</sup> cells) <sup>-1</sup> hr <sup>-1</sup> | 0.032     | 20   | 9         | 20 | Log                     | 317     | Zeledon & de Monge 1967                                                          |
| 59. Trypanosomatidae | Leishmania brasiliensis            | ml O <sub>2</sub> (10 <sup>9</sup> cells) <sup>-1</sup> hr <sup>-1</sup> | 0.040     | 28   | 8         | 20 | Log                     | 317     | Zeledon & de Monge 1967                                                          |
| 60. Trypanosomatidae | Leishmania donovani                | ml O <sub>2</sub> (10 <sup>9</sup> cells) <sup>-1</sup> hr <sup>-1</sup> | 0.039     | 12   | [18]      | 20 |                         | 102     | Fulton & Joyner 1949                                                             |
| 61. Trypanosomatidae | Leishmania donovani                | ml O <sub>2</sub> (10 <sup>9</sup> cells) <sup>-1</sup> hr <sup>-1</sup> | 0.055     | 17   | [18]      | 20 | 3 days                  | 56      | Chatterjee & Ghosh 1959                                                          |
| 62. Trypanosomatidae | Leishmania donovani                | ml O <sub>2</sub> (10 <sup>9</sup> cells) <sup>-1</sup> hr <sup>-1</sup> | 0.030     | 9.3  | [18]      | 20 | 6 days                  | 56      | Chatterjee & Ghosh 1959                                                          |
| 63. Trypanosomatidae | Leishmania donovani                | ml O <sub>2</sub> (10 <sup>9</sup> cells) <sup>-1</sup> hr <sup>-1</sup> | 0.249     | 77   | [18]      | 20 | 3 days                  | 108     | Ghosh & Chatterjee 1961                                                          |
| 64. Trypanosomatidae | Leishmania enrietti                | ml O <sub>2</sub> (10 <sup>9</sup> cells) <sup>-1</sup> hr <sup>-1</sup> | 0.015     | 7.0  | [12]      | 20 | Log                     | 312     | Zeledon 1960a                                                                    |
| 65. Trypanosomatidae | Leishmania enrietti                | ml O <sub>2</sub> (10 <sup>9</sup> cells) <sup>-1</sup> hr <sup>-1</sup> | 0.017     | 7.9  | [12]      | 20 | Log                     | 313     | Zeledon 1960b                                                                    |
| 66. Trypanosomatidae | Leishmania enrietti                | ml O <sub>2</sub> (10 <sup>9</sup> cells) <sup>-1</sup> hr <sup>-1</sup> | 0.022     | 10   | [12]      | 20 |                         | 111     | Greenblatt & Glaser 1965                                                         |
| 67. Paramoebidae     | Mayorella palestinensis            | ml O <sub>2</sub> (10 <sup>9</sup> cells) <sup>-1</sup> hr <sup>-1</sup> | 5.52      | 3.7  | 8300      | 20 | 1 day starvation        | 236     | Reich 1948                                                                       |
| 68. Dinophyceae      | Noctiluca miliaris                 | ml O <sub>2</sub> (10 <sup>9</sup> cells) <sup>-1</sup> hr <sup>-1</sup> | 57897     | 1.4  | 223986000 | 20 |                         | 232     | Rajagopal 1962                                                                   |
| 69. Ciliophora       | Paramecium aurelia                 | ml O <sub>2</sub> (10 <sup>9</sup> cells) <sup>-1</sup> hr <sup>-1</sup> | 354       | 34.9 | 105000    | 20 | 10 days                 | 219     | Pace & Kimura 1944                                                               |

|                  |                                   |                                                                          |         |      |          |    |                                                                          |       |                                   |
|------------------|-----------------------------------|--------------------------------------------------------------------------|---------|------|----------|----|--------------------------------------------------------------------------|-------|-----------------------------------|
| 70.Ciliophora    | Paramecium aurelia                | ml O <sub>2</sub> (10 <sup>9</sup> cells) <sup>-1</sup> hr <sup>-1</sup> | 775     | 34.2 | 127000   | 20 | 5-7 days                                                                 | 215   | Pace 1945                         |
| 71.Ciliophora    | Paramecium aurelia                | ml O <sub>2</sub> (10 <sup>9</sup> cells) <sup>-1</sup> hr <sup>-1</sup> | 81.5    | 2.9  | 160000   | 20 | 2 days<br>starvation                                                     | 258   | Simonsen & Van Wagtendonk<br>1952 |
| 72.Ciliophora    | Paramecium aurelia                | ml O <sub>2</sub> (10 <sup>9</sup> cells) <sup>-1</sup> hr <sup>-1</sup> | 266-280 | 9.6  | 160000   | 20 | 2 days<br>starvation                                                     | 165   | Levine & Howard 1955              |
| 73.Ciliophora    | Paramecium calkinsi               | ml O <sub>2</sub> (10 <sup>9</sup> cells) <sup>-1</sup> hr <sup>-1</sup> | 158-177 | 10.0 | [157000] | 20 | Capable of<br>copulation                                                 | 32,33 | Boell & Woodruff 1940             |
| 74.Ciliophora    | Paramecium calkinsi               | ml O <sub>2</sub> (10 <sup>9</sup> cells) <sup>-1</sup> hr <sup>-1</sup> | 272-304 | 6.0  | [157000] | 20 | Incapable of<br>copulation                                               | 32,33 | Boell & Woodruff 1940             |
| 75.Ciliophora    | Paramecium calkinsi               | ml O <sub>2</sub> (10 <sup>9</sup> cells) <sup>-1</sup> hr <sup>-1</sup> | 89-101  | 10.5 | [157000] | 20 | Basal level                                                              | 33    | Woodruff 1940                     |
| 76.Ciliophora    | Paramecium calkinsi               | ml O <sub>2</sub> (10 <sup>9</sup> cells) <sup>-1</sup> hr <sup>-1</sup> | 285     | 3.4  | [157000] | 20 |                                                                          | 31    | Boell 1945                        |
| 77.Ciliophora    | Paramecium caudatum               | ml O <sub>2</sub> (10 <sup>9</sup> cells) <sup>-1</sup> hr <sup>-1</sup> | 79      | 0.8  | [526000] | 20 | Saturated                                                                | 179   | Lund 1918                         |
| 78.Ciliophora    | Paramecium caudatum               | ml O <sub>2</sub> (10 <sup>9</sup> cells) <sup>-1</sup> hr <sup>-1</sup> | 22      | 0.2  | [526000] | 20 | 2 days<br>starvation                                                     | 179   | Lund 1918                         |
| 79.Ciliophora    | Paramecium caudatum               | ml O <sub>2</sub> (10 <sup>9</sup> cells) <sup>-1</sup> hr <sup>-1</sup> | 2713    | 30.3 | 501000   | 20 |                                                                          | 73    | Cunningham & Kirk 1942            |
| 80.Ciliophora    | Paramecium caudatum               | ml O <sub>2</sub> (10 <sup>9</sup> cells) <sup>-1</sup> hr <sup>-1</sup> | 2110    | 17.7 | 668000   | 20 | 10 days                                                                  | 219   | Pace & Kimura 1944                |
| 81.Ciliophora    | Paramecium caudatum               | ml O <sub>2</sub> (10 <sup>9</sup> cells) <sup>-1</sup> hr <sup>-1</sup> | 418     | 4.5  | 526000   | 20 |                                                                          | 61    | Clark 1945                        |
| 82.Ciliophora    | Paramecium caudatum               | ml O <sub>2</sub> (10 <sup>9</sup> cells) <sup>-1</sup> hr <sup>-1</sup> | 2804    | 25.4 | 618000   | 20 | 5 days                                                                   | 215   | Pace 1945                         |
| 83.Ciliophora    | Paramecium caudatum               | ml O <sub>2</sub> (10 <sup>9</sup> cells) <sup>-1</sup> hr <sup>-1</sup> | 2464    | 22.1 | 618000   | 20 | 15 days                                                                  | 215   | Pace 1945                         |
| 84.Ciliophora    | Paramecium caudatum               | ml O <sub>2</sub> (10 <sup>9</sup> cells) <sup>-1</sup> hr <sup>-1</sup> | 1709    | 15.5 | 618000   | 20 | 19 days                                                                  | 215   | Pace 1945                         |
| 85.Ciliophora    | Paramecium caudatum               | ml O <sub>2</sub> (10 <sup>9</sup> cells) <sup>-1</sup> hr <sup>-1</sup> | 394     | 4.2  | 526000   | 20 |                                                                          | 211   | Nicol 1960                        |
| 86.Ciliophora    | Paramecium caudatum               | ml O <sub>2</sub> (10 <sup>9</sup> cells) <sup>-1</sup> hr <sup>-1</sup> | 300     | 3.2  | 530000   | 20 |                                                                          | 17,18 | Khlebovitch 1972; 1974            |
| 87.Ciliophora    | Paramecium<br>multimicronucleatum | ml O <sub>2</sub> (10 <sup>9</sup> cells) <sup>-1</sup> hr <sup>-1</sup> | 646     | 5.3  | [685000] | 20 |                                                                          | 191   | Mast et al. 1936                  |
| 88.Amoebidae     | Pelomyxa carolinensis             | ml O <sub>2</sub> (10 <sup>9</sup> cells) <sup>-1</sup> hr <sup>-1</sup> | 7050    | 1.1  | 36730000 | 20 | 3 days<br>starvation                                                     | 216   | Pace & Belda 1944a                |
| 89.Amoebidae     | Pelomyxa carolinensis             | ml O <sub>2</sub> (10 <sup>9</sup> cells) <sup>-1</sup> hr <sup>-1</sup> | 6381    | 1.0  | 35400000 | 20 |                                                                          | 217   | Pace & Belda 1944b                |
| 90.Amoebidae     | Pelomyxa carolinensis             | ml O <sub>2</sub> (10 <sup>9</sup> cells) <sup>-1</sup> hr <sup>-1</sup> | 5728    | 1.0  | 32830000 | 20 |                                                                          | 217   | Pace & Belda 1944b                |
| 91.Amoebidae     | Pelomyxa carolinensis             | ml O <sub>2</sub> (10 <sup>9</sup> cells) <sup>-1</sup> hr <sup>-1</sup> | 6291    | 1.1  | 32010000 | 20 |                                                                          | 217   | Pace & Belda 1944b                |
| 92.Amoebidae     | Pelomyxa carolinensis             | ml O <sub>2</sub> (10 <sup>9</sup> cells) <sup>-1</sup> hr <sup>-1</sup> | 5594    | 0.9  | 36060000 | 20 |                                                                          | 220   | Pace & Kimura 1946                |
| 93.Amoebidae     | Pelomyxa carolinensis             | ml O <sub>2</sub> (10 <sup>9</sup> cells) <sup>-1</sup> hr <sup>-1</sup> | 4763    | 0.5  | 49708000 | 20 |                                                                          | 218   | Pace & Frost 1948                 |
| 94.Amoebidae     | Pelomyxa carolinensis             | ml O <sub>2</sub> (10 <sup>9</sup> cells) <sup>-1</sup> hr <sup>-1</sup> | 8041    | 0.9  | 49708000 | 20 | Young                                                                    | 222   | Pace & McCashland 1951            |
| 95.Amoebidae     | Pelomyxa palustris                | ml O <sub>2</sub> (10 <sup>9</sup> cells) <sup>-1</sup> hr <sup>-1</sup> | 11955   | 0.7  | 90000000 | 20 |                                                                          | 163   | Leiner et al. 1968                |
| 96.Apicomplexa   | Plasmodium cathemerium            | ml O <sub>2</sub> (10 <sup>9</sup> cells) <sup>-1</sup> hr <sup>-1</sup> | 0.017   | 1.8  | 54       | 20 | Intact blood, ¼<br>growth                                                | 184   | Maier & Coggeshall 1941           |
| 97.Apicomplexa   | Plasmodium cathemerium            | ml O <sub>2</sub> (10 <sup>9</sup> cells) <sup>-1</sup> hr <sup>-1</sup> | 0.051   | 3.2  | 89       | 20 | Intact blood, ¾<br>growth                                                | 184   | Maier & Coggeshall 1941           |
| 98.Apicomplexa   | Plasmodium gallinaceum            | ml O <sub>2</sub> (10 <sup>9</sup> cells) <sup>-1</sup> hr <sup>-1</sup> | 0.016   | 1.3  | 71       | 20 | Erythrocytes<br>extracted from<br>blood                                  | 96    | Evans 1946                        |
| 99.Apicomplexa   | Plasmodium gallinaceum            | ml O <sub>2</sub> (10 <sup>9</sup> cells) <sup>-1</sup> hr <sup>-1</sup> | 0.014   | 1.1  | 71       | 20 | Erythrocytes<br>extracted from<br>blood, 3 days<br>after infection       | 264   | Speck et al. 1946                 |
| 100. Apicomplexa | Plasmodium gallinaceum            | ml O <sub>2</sub> (10 <sup>9</sup> cells) <sup>-1</sup> hr <sup>-1</sup> | 0.010   | 0.8  | 71       | 20 | Erythrocytes<br>extracted from<br>blood, 58%<br>infected<br>erythrocytes | 186   | Marshall 1948a                    |

|      |                  |                                 |                                                                          |         |      |          |    |                                                                |         |                                    |
|------|------------------|---------------------------------|--------------------------------------------------------------------------|---------|------|----------|----|----------------------------------------------------------------|---------|------------------------------------|
| 101. | Apicomplexa      | Plasmodium gallinaceum          | ml O <sub>2</sub> (10 <sup>9</sup> cells) <sup>-1</sup> hr <sup>-1</sup> | 0.031   | 2.4  | 71       | 20 | Erythrocytes extracted from blood, 96% infected                | 187     | Marshall 1948b                     |
| 102. | Apicomplexa      | Plasmodium knowlesi             | ml O <sub>2</sub> (10 <sup>9</sup> cells) <sup>-1</sup> hr <sup>-1</sup> | 0.303   | 28.8 | 59       | 20 | erythrocytes Erythrocytes extracted from blood, 7-12% infected | 101     | Fulton 1939                        |
| 103. | Apicomplexa      | Plasmodium knowlesi             | ml O <sub>2</sub> (10 <sup>9</sup> cells) <sup>-1</sup> hr <sup>-1</sup> | 0.009   | 0.9  | 59       | 20 | erythrocytes                                                   | 184     | Maier & Coggeshall 1941            |
| 104. | Apicomplexa      | Plasmodium knowlesi             | ml O <sub>2</sub> (10 <sup>9</sup> cells) <sup>-1</sup> hr <sup>-1</sup> | 0.010   | 1.5  | 37       | 20 | Erythrocytes extracted from blood, 35% infected                | 199     | McKee et al. 1946                  |
| 105. | Kinetoplastida   | Pleuromonas jaculans            | nl O <sub>2</sub> (cell) <sup>-1</sup> hr <sup>-1</sup>                  | 0.00005 | 12   | 25       | 20 | erythrocytes starved                                           | OTHER   | Fenchel & Finlay 1983              |
| 106. | Ciliophora?      | Podophrya fixa                  | nl O <sub>2</sub> (cell) <sup>-1</sup> hr <sup>-1</sup>                  | 0.0077  | 0.52 | 14900    | 20 | starved 96 hr                                                  | OTHER   | Fenchel & Finlay 1983              |
| 107. | Trypanosomatidae | Schizotrypanum verpertilionis   | ml O <sub>2</sub> (10 <sup>9</sup> cells) <sup>-1</sup> hr <sup>-1</sup> | 0.040   | 2.1  | 108      | 20 | Log                                                            | 312     | Zeledon 1960a                      |
| 108. | Ciliophora?      | Spirostoma minus                | nl O <sub>2</sub> (cell) <sup>-1</sup> hr <sup>-1</sup>                  | 0.31    | 3.4  | [500000] | 20 | starved                                                        | OTHER   | Fenchel & Finlay 1983              |
| 109. | Ciliophora       | Spirostomum ambiguum            | ml O <sub>2</sub> (10 <sup>9</sup> cells) <sup>-1</sup> hr <sup>-1</sup> | 12700   | 5.9  | 12000000 | 20 |                                                                | 17      | Khlebovitch 1972                   |
| 110. | Ciliophora       | Spirostomum intermedium         | ml O <sub>2</sub> (10 <sup>9</sup> cells) <sup>-1</sup> hr <sup>-1</sup> | 500     | 2.1  | 1342000  | 20 | 6 days                                                         | 226     | Pigon 1955                         |
| 111. | Ciliophora       | Spirostomum intermedium         | ml O <sub>2</sub> (10 <sup>9</sup> cells) <sup>-1</sup> hr <sup>-1</sup> | 50      | 1.2  | 229000   | 20 | 113 days                                                       | 226     | Pigon 1955                         |
| 112. | Ciliophora       | Spirostomum teres               | ml O <sub>2</sub> (10 <sup>9</sup> cells) <sup>-1</sup> hr <sup>-1</sup> | 40      | 0.5  | 423000   | 20 |                                                                | 158     | Laybourn & Finlay 1976             |
| 113. | Ciliophora       | Stentor coeruleus               | ml O <sub>2</sub> (10 <sup>9</sup> cells) <sup>-1</sup> hr <sup>-1</sup> | 1588    | 13.1 | [680000] | 20 | 3-5 days starvation                                            | 303     | Whiteley 1960                      |
| 114. | Ciliophora       | Stentor coeruleus               | ml O <sub>2</sub> (10 <sup>9</sup> cells) <sup>-1</sup> hr <sup>-1</sup> | 350     | 1.8  | 1100000  | 20 | Before division                                                | 156     | Laybourn 1975                      |
| 115. | Ciliophora       | Stentor coeruleus               | ml O <sub>2</sub> (10 <sup>9</sup> cells) <sup>-1</sup> hr <sup>-1</sup> | 225     | 1.9  | 680000   | 20 | 3 days after division                                          | 156     | Laybourn 1975                      |
| 116. | Ciliophora       | Tetrahymena geleii (pyriformis) | ml O <sub>2</sub> (10 <sup>9</sup> cells) <sup>-1</sup> hr <sup>-1</sup> | 77      | 12.3 | 35000    | 20 | Log                                                            | 213     | Ormsbee 1942                       |
| 117. | Ciliophora       | Tetrahymena geleii (pyriformis) | ml O <sub>2</sub> (10 <sup>9</sup> cells) <sup>-1</sup> hr <sup>-1</sup> | 74      | 7.8  | 53000    | 20 | Stationary                                                     | 213     | Ormsbee 1942                       |
| 118. | Ciliophora       | Tetrahymena geleii (pyriformis) | ml O <sub>2</sub> (10 <sup>9</sup> cells) <sup>-1</sup> hr <sup>-1</sup> | 193     | 45.0 | 24000    | 20 | 3 days                                                         | 221     | Pace & Lyman 1947                  |
| 119. | Ciliophora       | Tetrahymena geleii (pyriformis) | ml O <sub>2</sub> (10 <sup>9</sup> cells) <sup>-1</sup> hr <sup>-1</sup> | 128     | 29.9 | 24000    | 20 | 6-7 days                                                       | 221     | Pace & Lyman 1947                  |
| 120. | Ciliophora       | Tetrahymena geleii (pyriformis) | ml O <sub>2</sub> (10 <sup>9</sup> cells) <sup>-1</sup> hr <sup>-1</sup> | 26.6    | 6.8  | [22000]  | 20 | Log                                                            | 253     | Seaman 1949                        |
| 121. | Ciliophora       | Tetrahymena geleii (pyriformis) | ml O <sub>2</sub> (10 <sup>9</sup> cells) <sup>-1</sup> hr <sup>-1</sup> | 23      | 5.9  | [22000]  | 20 | 3.5 days                                                       | 254,255 | Seaman 1950; Seaman & Noulhan 1950 |
| 122. | Ciliophora       | Tetrahymena geleii (pyriformis) | ml O <sub>2</sub> (10 <sup>9</sup> cells) <sup>-1</sup> hr <sup>-1</sup> | 59      | 15.0 | [22000]  | 20 | 48 hr                                                          | 89      | Eichel 1953                        |
| 123. | Ciliophora       | Tetrahymena geleii (pyriformis) | ml O <sub>2</sub> (10 <sup>9</sup> cells) <sup>-1</sup> hr <sup>-1</sup> | 62      | 15.8 | [22000]  | 20 | 6-10 days                                                      | 214     | Ottova 1955                        |
| 124. | Ciliophora       | Tetrahymena geleii (pyriformis) | ml O <sub>2</sub> (10 <sup>9</sup> cells) <sup>-1</sup> hr <sup>-1</sup> | 24      | 6.1  | [22000]  | 20 | 20 days                                                        | 214     | Ottova 1955                        |
| 125. | Ciliophora       | Tetrahymena pyriformis          | ml O <sub>2</sub> (10 <sup>9</sup> cells) <sup>-1</sup> hr <sup>-1</sup> | 95      | 24.2 | [22000]  | 20 | 6 days                                                         | 182     | Lwoff 1934                         |
| 126. | Ciliophora       | Tetrahymena pyriformis          | ml O <sub>2</sub> (10 <sup>9</sup> cells) <sup>-1</sup> hr <sup>-1</sup> | 82      | 20.9 | [22000]  | 20 | 6 days                                                         | 243     | Ryley 1952                         |
| 127. | Ciliophora       | Tetrahymena pyriformis          | ml O <sub>2</sub> (10 <sup>9</sup> cells) <sup>-1</sup> hr <sup>-1</sup> | 39      | 9.9  | [22000]  | 20 | 4 days                                                         | 241     | Roth et al. 1954                   |

|      |                  |                                     |                                                                          |       |      |         |    |                           |         |                          |
|------|------------------|-------------------------------------|--------------------------------------------------------------------------|-------|------|---------|----|---------------------------|---------|--------------------------|
| 128. | Ciliophora       | Tetrahymena pyriformis              | ml O <sub>2</sub> (10 <sup>9</sup> cells) <sup>-1</sup> hr <sup>-1</sup> | 31    | 7.9  | [22000] | 20 | 17 hr<br>starvation       | 241     | Roth et al. 1954         |
| 129. | Ciliophora       | Tetrahymena pyriformis              | ml O <sub>2</sub> (10 <sup>9</sup> cells) <sup>-1</sup> hr <sup>-1</sup> | 52.8  | 13.4 | [22000] | 20 | 3 days                    | 240     | Roth & Eichel 1955       |
| 130. | Ciliophora       | Tetrahymena pyriformis              | ml O <sub>2</sub> (10 <sup>9</sup> cells) <sup>-1</sup> hr <sup>-1</sup> | 42    | 13.8 | 17000   | 20 | Log                       | 120     | Hamburger & Zeuthen 1957 |
| 131. | Ciliophora       | Tetrahymena pyriformis              | ml O <sub>2</sub> (10 <sup>9</sup> cells) <sup>-1</sup> hr <sup>-1</sup> | 53    | 6.1  | 49000   | 20 | Synchronized              | 120     | Hamburger & Zeuthen 1957 |
| 132. | Ciliophora       | Tetrahymena pyriformis              | ml O <sub>2</sub> (10 <sup>9</sup> cells) <sup>-1</sup> hr <sup>-1</sup> | 67    | 11.4 | 33000   | 20 | 3-7 days                  | 276     | Van de Vijver 1966       |
| 133. | Ciliophora       | Tetrahymena pyriformis              | ml O <sub>2</sub> (10 <sup>9</sup> cells) <sup>-1</sup> hr <sup>-1</sup> | 29    | 7.4  | 22000   | 20 |                           | 62      | Conner & Cline 1967      |
| 134. | Ciliophora       | Tetrahymena pyriformis              | ml O <sub>2</sub> (10 <sup>9</sup> cells) <sup>-1</sup> hr <sup>-1</sup> | 63.9  | 16.3 | 22000   | 20 | 5-10 days,<br>saturated   | 29      | Biczók 1969              |
| 135. | Ciliophora       | Tetrahymena pyriformis              | ml O <sub>2</sub> (10 <sup>9</sup> cells) <sup>-1</sup> hr <sup>-1</sup> | 53.2  | 13.5 | 22000   | 20 | 24 hr<br>starvation       | 29      | Biczók 1969              |
| 136. | Ciliophora       | Tetrahymena pyriformis              | ml O <sub>2</sub> (10 <sup>9</sup> cells) <sup>-1</sup> hr <sup>-1</sup> | 25.2  | 6.4  | 22000   | 20 | 1-2 hr<br>starvation      | 121     | Hamburger & Zeuthen 1971 |
| 137. | Ciliophora       | Tetrahymena pyriformis              | ml O <sub>2</sub> (10 <sup>9</sup> cells) <sup>-1</sup> hr <sup>-1</sup> | 48    | 12.2 | 22000   | 20 | 5-6 days                  | 47      | Burmeister 1972          |
| 138. | Ciliophora       | Tetrahymena pyriformis              | ml O <sub>2</sub> (10 <sup>9</sup> cells) <sup>-1</sup> hr <sup>-1</sup> | 185   | 94.2 | 11000   | 20 |                           | 17,18   | Khlebovitch 1972; 1974   |
| 139. | Ciliophora       | Tetrahymena pyriformis              | ml O <sub>2</sub> (10 <sup>9</sup> cells) <sup>-1</sup> hr <sup>-1</sup> | 40    | 10.2 | 22000   | 20 | 5-6 days                  | 48      | Burmeister 1976          |
| 140. | Ciliophora       | Tracheloraphis sp.                  | ml O <sub>2</sub> (10 <sup>9</sup> cells) <sup>-1</sup> hr <sup>-1</sup> | 969   | 16.0 | 340000  | 20 | 24 hr after<br>collection | 278     | Vernberg & Coull 1974    |
| 141. | Trichomonada     | Trichomonas (Tritrichomonas) foetus | ml O <sub>2</sub> (10 <sup>9</sup> cells) <sup>-1</sup> hr <sup>-1</sup> | 0.67  | 3.6  | 670     | 20 | 48 hr                     | 246     | Ryley 1955b              |
| 142. | Trichomonada     | Trichomonas (Tritrichomonas) foetus | ml O <sub>2</sub> (10 <sup>9</sup> cells) <sup>-1</sup> hr <sup>-1</sup> | 0.282 | 2.7  | [580]   | 20 | 48 hr                     | 83      | Doran 1957               |
| 143. | Trichomonada     | Trichomonas (Tritrichomonas) foetus | ml O <sub>2</sub> (10 <sup>9</sup> cells) <sup>-1</sup> hr <sup>-1</sup> | 0.47  | 4.5  | [580]   | 20 | 24 hr                     | 51      | Čerkasovová 1970         |
| 144. | Trichomonada     | Trichomonas batrachorum             | ml O <sub>2</sub> (10 <sup>9</sup> cells) <sup>-1</sup> hr <sup>-1</sup> | 0.192 | 1.9  | [560]   | 20 | 48 hr                     | 84      | Doran 1958               |
| 145. | Trichomonada     | Trichomonas nasai                   | ml O <sub>2</sub> (10 <sup>9</sup> cells) <sup>-1</sup> hr <sup>-1</sup> | 0.305 | 8.1  | [210]   | 20 | 48 hr                     | 83      | Doran 1957               |
| 146. | Trichomonada     | Trichomonas vaginalis               | ml O <sub>2</sub> (10 <sup>9</sup> cells) <sup>-1</sup> hr <sup>-1</sup> | 0.204 | 1.7  | [690]   | 20 | 24-48 hr                  | 233     | Read & Rothman 1955      |
| 147. | Trichomonada     | Trichomonas vaginalis               | ml O <sub>2</sub> (10 <sup>9</sup> cells) <sup>-1</sup> hr <sup>-1</sup> | 0.16  | 1.0  | 870     | 20 | 48 hr                     | 309     | Wirtschafter et al. 1956 |
| 148. | Amoebae          | Trichosphaerium sieboldi            | % cell carbon hr <sup>-1</sup>                                           | 0.27  | 4    | 100     | 20 | starved 24 hr             | OTHER   | Crawford et al. 1994     |
| 149. | Trypanosomatidae | Trypanosoma (Schizotrypanum) cruzi  | ml O <sub>2</sub> (10 <sup>9</sup> cells) <sup>-1</sup> hr <sup>-1</sup> | 0.028 | 1.5  | [107]   | 20 | 14 days,<br>cultured      | 209     | Nakamura & Anderson 1951 |
| 150. | Trypanosomatidae | Trypanosoma (Schizotrypanum) cruzi  | ml O <sub>2</sub> (10 <sup>9</sup> cells) <sup>-1</sup> hr <sup>-1</sup> | 0.058 | 4.0  | 82      | 20 | cultured                  | 282     | von Brand & Agosin 1952  |
| 151. | Trypanosomatidae | Trypanosoma (Schizotrypanum) cruzi  | ml O <sub>2</sub> (10 <sup>9</sup> cells) <sup>-1</sup> hr <sup>-1</sup> | 0.063 | 3.3  | [107]   | 20 | 14<br>days,cultured       | 247     | Ryley 1956               |
| 152. | Trypanosomatidae | Trypanosoma (Schizotrypanum) cruzi  | ml O <sub>2</sub> (10 <sup>9</sup> cells) <sup>-1</sup> hr <sup>-1</sup> | 0.036 | 1.2  | 169     | 20 | Blood form                | 247     | Ryley 1956               |
| 153. | Trypanosomatidae | Trypanosoma (Schizotrypanum) cruzi  | ml O <sub>2</sub> (10 <sup>9</sup> cells) <sup>-1</sup> hr <sup>-1</sup> | 0.040 | 2.1  | [107]   | 20 | cultured                  | 312     | Zeledon 1960a            |
| 154. | Trypanosomatidae | Trypanosoma (Schizotrypanum) cruzi  | ml O <sub>2</sub> (10 <sup>9</sup> cells) <sup>-1</sup> hr <sup>-1</sup> | 0.041 | 2.1  | [107]   | 20 | cultured                  | 313     | Zeledon 1960b            |
| 155. | Trypanosomatidae | Trypanosoma (Schizotrypanum) cruzi  | ml O <sub>2</sub> (10 <sup>9</sup> cells) <sup>-1</sup> hr <sup>-1</sup> | 0.044 | 2.3  | [107]   | 20 | Log, cultured             | 315     | Zeledon 1960d            |
| 156. | Trypanosomatidae | Trypanosoma lewisi                  | ml O <sub>2</sub> (10 <sup>9</sup> cells) <sup>-1</sup> hr <sup>-1</sup> | 0.009 | 0.9  | 58      | 20 | 10-12 days                | 242,244 | Ryley 1951; 1953         |
| 157. | Trypanosomatidae | Trypanosoma lewisi                  | ml O <sub>2</sub> (10 <sup>9</sup> cells) <sup>-1</sup> hr <sup>-1</sup> | 0.011 | 1.1  | 58      | 20 | 8-10 days                 | 247     | Ryley 1956               |
| 158. | Trypanosomatidae | Trypanosoma lewisi                  | ml O <sub>2</sub> (10 <sup>9</sup> cells) <sup>-1</sup> hr <sup>-1</sup> | 0.074 | 7.1  | 58      | 20 | 7-9 days                  | 272     | Thurston 1958            |
| 159. | Trypanosomatidae | Trypanosoma lewisi                  | ml O <sub>2</sub> (10 <sup>9</sup> cells) <sup>-1</sup> hr <sup>-1</sup> | 0.127 | 15.5 | 46      | 20 | 4 days                    | 249     | Sanchez & Dusanic 1968   |
| 160. | Trypanosomatidae | Trypanosoma lewisi                  | ml O <sub>2</sub> (10 <sup>9</sup> cells) <sup>-1</sup> hr <sup>-1</sup> | 0.216 | 20.9 | 58      | 20 | 8 days                    | 249     | Sanchez & Dusanic 1968   |
| 161. | Trypanosomatidae | Trypanosoma lewisi                  | ml O <sub>2</sub> (10 <sup>9</sup> cells) <sup>-1</sup> hr <sup>-1</sup> | 0.141 | 13.6 | 58      | 20 | 12 days                   | 249     | Sanchez & Dusanic 1968   |
| 162. | Trypanosomatidae | Trypanosoma lewisi                  | ml O <sub>2</sub> (10 <sup>9</sup> cells) <sup>-1</sup> hr <sup>-1</sup> | 0.289 | 28   | 58      | 20 | mean                      | 174     | Lincicome & Warsi 1965   |
| 163. | Trypanosomatidae | Trypanosoma lewisi                  | ml O <sub>2</sub> (10 <sup>9</sup> cells) <sup>-1</sup> hr <sup>-1</sup> | 0.082 | 7.9  | 58      | 20 | 8 days                    | 175     | Lincicome & Warsi 1966   |

|      |                  |                    |                                                                          |       |      |          |    |            |       |                        |
|------|------------------|--------------------|--------------------------------------------------------------------------|-------|------|----------|----|------------|-------|------------------------|
| 164. | Trypanosomatidae | Trypanosoma lewisi | ml O <sub>2</sub> (10 <sup>9</sup> cells) <sup>-1</sup> hr <sup>-1</sup> | 0.211 | 20.4 | 58       | 20 | 14 days    | 175   | Lincicome & Warsi 1966 |
| 165. | Trypanosomatidae | Trypanosoma lewisi | ml O <sub>2</sub> (10 <sup>9</sup> cells) <sup>-1</sup> hr <sup>-1</sup> | 0.207 | 20.0 | 58       | 20 | 16 days    | 175   | Lincicome & Warsi 1966 |
| 166. | Trypanosomatidae | Trypanosoma lewisi | ml O <sub>2</sub> (10 <sup>9</sup> cells) <sup>-1</sup> hr <sup>-1</sup> | 0.141 | 13.6 | 58       | 20 | mean       | 175   | Lincicome & Warsi 1966 |
| 167. | Trypanosomatidae | Trypanosoma lewisi | ml O <sub>2</sub> (10 <sup>9</sup> cells) <sup>-1</sup> hr <sup>-1</sup> | 0.063 | 6.1  | 58       | 20 | 8 days     | 171   | Lincicome & Lee 1971   |
| 168. | Trypanosomatidae | Trypanosoma lewisi | ml O <sub>2</sub> (10 <sup>9</sup> cells) <sup>-1</sup> hr <sup>-1</sup> | 0.174 | 16.8 | 58       | 20 | 12 days    | 171   | Lincicome & Lee 1971   |
| 169. | Trypanosomatidae | Trypanosoma lewisi | ml O <sub>2</sub> (10 <sup>9</sup> cells) <sup>-1</sup> hr <sup>-1</sup> | 0.063 | 6.1  | 58       | 20 | 18 days    | 171   | Lincicome & Lee 1971   |
| 170. | Trypanosomatidae | Trypanosoma lewisi | ml O <sub>2</sub> (10 <sup>9</sup> cells) <sup>-1</sup> hr <sup>-1</sup> | 0.115 | 11.1 | 58       | 20 | 8 days     | 176   | Lincicome & Warsi 1968 |
| 171. | Trypanosomatidae | Trypanosoma lewisi | ml O <sub>2</sub> (10 <sup>9</sup> cells) <sup>-1</sup> hr <sup>-1</sup> | 0.223 | 21.5 | 58       | 20 | 14 days    | 176   | Lincicome & Warsi 1968 |
| 172. | Trypanosomatidae | Trypanosoma lewisi | ml O <sub>2</sub> (10 <sup>9</sup> cells) <sup>-1</sup> hr <sup>-1</sup> | 0.181 | 17.5 | 58       | 20 | 18 days    | 176   | Lincicome & Warsi 1968 |
| 173. | Trypanosomatidae | Trypanosoma lewisi | ml O <sub>2</sub> (10 <sup>9</sup> cells) <sup>-1</sup> hr <sup>-1</sup> | 0.061 | 5.9  | 58       | 20 | 8 days     | 172   | Lincicome & Smith 1964 |
| 174. | Trypanosomatidae | Trypanosoma lewisi | ml O <sub>2</sub> (10 <sup>9</sup> cells) <sup>-1</sup> hr <sup>-1</sup> | 0.110 | 10.6 | 58       | 20 | 10 days    | 172   | Lincicome & Smith 1964 |
| 175. | Trypanosomatidae | Trypanosoma lewisi | ml O <sub>2</sub> (10 <sup>9</sup> cells) <sup>-1</sup> hr <sup>-1</sup> | 0.117 | 11.3 | 58       | 20 | 12 days    | 172   | Lincicome & Smith 1964 |
| 176. | Trypanosomatidae | Trypanosoma lewisi | ml O <sub>2</sub> (10 <sup>9</sup> cells) <sup>-1</sup> hr <sup>-1</sup> | 0.014 | 1.7  | 46       | 20 | 6 days     | 170   | Lincicome & Hill 1965  |
| 177. | Trypanosomatidae | Trypanosoma lewisi | ml O <sub>2</sub> (10 <sup>9</sup> cells) <sup>-1</sup> hr <sup>-1</sup> | 0.054 | 5.2  | 58       | 20 | 14 days    | 170   | Lincicome & Hill 1965  |
| 178. | Trypanosomatidae | Trypanosoma lewisi | ml O <sub>2</sub> (10 <sup>9</sup> cells) <sup>-1</sup> hr <sup>-1</sup> | 0.059 | 5.7  | 58       | 20 | 17 days    | 170   | Lincicome & Hill 1965  |
| 179. | Trypanosomatidae | Trypanosoma lewisi | ml O <sub>2</sub> (10 <sup>9</sup> cells) <sup>-1</sup> hr <sup>-1</sup> | 0.211 | 20   | 58       | 20 | mean       | 174   | Lincicome & Warsi 1965 |
| 180. | Trypanosomatidae | Trypanosoma lewisi | ml O <sub>2</sub> (10 <sup>9</sup> cells) <sup>-1</sup> hr <sup>-1</sup> | 0.055 | 5.3  | 58       | 20 | 6-8 days   | 173   | Lincicome & Smith 1966 |
| 181. | Trypanosomatidae | Trypanosoma lewisi | ml O <sub>2</sub> (10 <sup>9</sup> cells) <sup>-1</sup> hr <sup>-1</sup> | 0.143 | 13.8 | 58       | 20 | 14 days    | 173   | Lincicome & Smith 1966 |
| 182. | Trypanosomatidae | Trypanosoma lewisi | ml O <sub>2</sub> (10 <sup>9</sup> cells) <sup>-1</sup> hr <sup>-1</sup> | 0.054 | 5.2  | 58       | 20 | 17 days    | 173   | Lincicome & Smith 1966 |
| 183. | Trypanosomatidae | Trypanosoma lewisi | ml O <sub>2</sub> (10 <sup>9</sup> cells) <sup>-1</sup> hr <sup>-1</sup> | 0.022 | 2.1  | 58       | 20 | 8 days     | 175   | Lincicome & Warsi 1966 |
| 184. | Trypanosomatidae | Trypanosoma lewisi | ml O <sub>2</sub> (10 <sup>9</sup> cells) <sup>-1</sup> hr <sup>-1</sup> | 0.101 | 9.8  | 58       | 20 | 14 days    | 175   | Lincicome & Warsi 1966 |
| 185. | Trypanosomatidae | Trypanosoma lewisi | ml O <sub>2</sub> (10 <sup>9</sup> cells) <sup>-1</sup> hr <sup>-1</sup> | 0.099 | 9.6  | 58       | 20 | 16 days    | 175   | Lincicome & Warsi 1966 |
| 186. | Trypanosomatidae | Trypanosoma lewisi | ml O <sub>2</sub> (10 <sup>9</sup> cells) <sup>-1</sup> hr <sup>-1</sup> | 0.303 | 29   | 58       | 20 | mean       | 175   | Lincicome & Warsi 1966 |
| 187. | Trypanosomatidae | Trypanosoma lewisi | ml O <sub>2</sub> (10 <sup>9</sup> cells) <sup>-1</sup> hr <sup>-1</sup> | 0.150 | 14.5 | 58       | 20 | 8 days     | 176   | Lincicome & Warsi 1968 |
| 188. | Trypanosomatidae | Trypanosoma lewisi | ml O <sub>2</sub> (10 <sup>9</sup> cells) <sup>-1</sup> hr <sup>-1</sup> | 0.319 | 30.8 | 58       | 20 | 14 days    | 176   | Lincicome & Warsi 1968 |
| 189. | Trypanosomatidae | Trypanosoma lewisi | ml O <sub>2</sub> (10 <sup>9</sup> cells) <sup>-1</sup> hr <sup>-1</sup> | 0.232 | 22.4 | 58       | 20 | 18 days    | 176   | Lincicome & Warsi 1968 |
| 190. | Trypanosomatidae | Trypanosoma lewisi | ml O <sub>2</sub> (10 <sup>9</sup> cells) <sup>-1</sup> hr <sup>-1</sup> | 0.134 | 12.9 | 58       | 20 | 6 days     | 171   | Lincicome & Lee 1971   |
| 191. | Trypanosomatidae | Trypanosoma lewisi | ml O <sub>2</sub> (10 <sup>9</sup> cells) <sup>-1</sup> hr <sup>-1</sup> | 0.364 | 35.1 | 58       | 20 | 13 days    | 171   | Lincicome & Lee 1971   |
| 192. | Trypanosomatidae | Trypanosoma lewisi | ml O <sub>2</sub> (10 <sup>9</sup> cells) <sup>-1</sup> hr <sup>-1</sup> | 0.282 | 27.2 | 58       | 20 | 18 days    | 171   | Lincicome & Lee 1971   |
| 193. | Trypanosomatidae | Trypanosoma lewisi | ml O <sub>2</sub> (10 <sup>9</sup> cells) <sup>-1</sup> hr <sup>-1</sup> | 0.621 | 60.0 | 58       | 20 | 7 days     | 159   | Lee & Barlow 1972      |
| 194. | Trypanosomatidae | Trypanosoma lewisi | ml O <sub>2</sub> (10 <sup>9</sup> cells) <sup>-1</sup> hr <sup>-1</sup> | 0.890 | 85.9 | 58       | 20 | 9 days     | 159   | Lee & Barlow 1972      |
| 195. | Trypanosomatidae | Trypanosoma lewisi | ml O <sub>2</sub> (10 <sup>9</sup> cells) <sup>-1</sup> hr <sup>-1</sup> | 0.263 | 25.4 | 58       | 20 | 14 days    | 159   | Lee & Barlow 1972      |
| 196. | Trypanosomatidae | Trypanosoma lewisi | ml O <sub>2</sub> (10 <sup>9</sup> cells) <sup>-1</sup> hr <sup>-1</sup> | 0.054 | 6.6  | 46       | 20 | 6 days     | 173   | Lincicome & Smith 1966 |
| 197. | Trypanosomatidae | Trypanosoma lewisi | ml O <sub>2</sub> (10 <sup>9</sup> cells) <sup>-1</sup> hr <sup>-1</sup> | 0.136 | 13.1 | 58       | 20 | 12-14 days | 173   | Lincicome & Smith 1966 |
| 198. | Trypanosomatidae | Trypanosoma lewisi | ml O <sub>2</sub> (10 <sup>9</sup> cells) <sup>-1</sup> hr <sup>-1</sup> | 0.068 | 6.6  | 58       | 20 | 17 days    | 173   | Lincicome & Smith 1966 |
| 199. | Trypanosomatidae | Trypanosoma lewisi | ml O <sub>2</sub> (10 <sup>9</sup> cells) <sup>-1</sup> hr <sup>-1</sup> | 0.082 | 7.9  | 58       | 20 | 8 days     | 176   | Lincicome & Warsi 1968 |
| 200. | Trypanosomatidae | Trypanosoma lewisi | ml O <sub>2</sub> (10 <sup>9</sup> cells) <sup>-1</sup> hr <sup>-1</sup> | 0.183 | 17.7 | 58       | 20 | 13 days    | 176   | Lincicome & Warsi 1968 |
| 201. | Trypanosomatidae | Trypanosoma lewisi | ml O <sub>2</sub> (10 <sup>9</sup> cells) <sup>-1</sup> hr <sup>-1</sup> | 0.122 | 11.8 | 58       | 20 | 18 days    | 176   | Lincicome & Warsi 1968 |
| 202. | Ciliophora       | Urostyla grandis   | nl O <sub>2</sub> (cell) <sup>-1</sup> hr <sup>-1</sup>                  | 1.7   | 57   | [166000] | 20 | starved    | OTHER | Fenchel & Finlay 1983  |

### References to Table S2a:

- Albritton B.C. (Ed.) Handbook of Biological Data. Standard values in nutrition and metabolism. Philadelphia: Saunders, 1955, 330 p.
- Biczók F. Photo-induced respiration of the sensitized Tetrahymena pyriformis GL, inhibited with KCN. - Acta biol. Szeged., 1969, v.15, N.1-4, p.89-92.
- Boell E.J. Respiratory enzymes in Paramecium: I. Cytochrome oxidase. - Proc. nat. Acad. Sci. USA, 1945, v.31, N.12, p.396-402.
- Boell E.J., Woodruff L.L. Mating and metabolism in Paramecium calkinsi. - Science, 1940, v.92, N.2392, p.417.

- Boell E.J., Woodruff L.L. Respiratory metabolism of mating types in *Paramecium calkinsi*. - J. exp. Zool., 1941, v.87, N.3, p.385-402.
- Burmeister J. Beeinflussung der Atmung und der Vitalität von *Tetrahymena pyriformis* durch die Aufnahme einiger Vitalfarbstoffe. - Z. allg. Mikrobiol., 1972, Bd.12, H.5, S.385-391.
- Burmeister J. Einfluss unterschiedlicher Temperaturen auf Stoffwechsel, Phagozytosevermögen und Vitalität von *Tetrahymena pyriformis*. - Z. allg. Mikrobiol., 1976, Bd.16, H.4, S.247-254.
- Čerkasovová A. Energy-producing metabolism of *Trichomonas foetus*. I. Evidence for control of intensity and the contribution of aerobiosis to total energy production. - Exp. Parasit., 1970, v.27, N.2, p.165-178.
- Chatterjee A.N., Ghosh J.J. Studies on the metabolism of *Leishmania donovani*, the causative organism for Kala-azar. - Ann. biochem. exp. Med., 1959, v.19, N.2, p.37-50.
- Clark A.M. The effect of cyanide and carbon monoxide on the oxygen consumption of *Paramecium caudatum*. - Austr. J. exp. Biol. Med. Sci., 1945, v.23, N.4, p.317-322.
- Conner R.L., Cline S.G. Some factors governing respiration, glucose metabolism and iodoacetate sensitivity in *Tetrahymena pyriformis*. - J. Protozool., 1967, v.14, N.1, p.22-26.
- Cosgrove W.B. Utilization of carbohydrates by the mosquito flagellate, *Crithidia fasciculata*. - Canad. J. Microbiol., 1959, v.5, N.6, p.573-578.
- Crawford D.W., Rogerson A., Laybourn-Parry J. (1994) Respiration of the marine amoeba *Trichosphaerium sieboldi* determined by <sup>14</sup>C labelling and Cartesian diver methods. Marine Ecology Progress Series 112: 135-142.
- Cunningham B., Kirk P.L. The oxygen consumption of single cells of *Paramecium caudatum* as measured by a capillary respirometer. - J. Cell. Comp. Physiol., 1942, v.20, N.3, p.119-134.
- de Monge E., Zeledón R. Effect of several organic compounds and metabolic inhibitors on the respiration of the culture form of a human strain of *Leishmania braziliensis* (O-CR). - J. Parasit., 1963, v.49, N.5, Suppl., p.22.
- Doran D.J. Studies on trichomonads. I. The metabolism of *Trichomonas foetus* and trichomonads from the nasal cavity and cecum of swine. - J. Protozool., 1957, v.4, N.3, p.182-190.
- Doran D.J. Studies on trichomonads. II. The metabolism of *Trichomonas batrachorum*-type flagellate from the cecum of swine. - J. Protozool., 1958, v.5, N.1, p.89-93.
- Edwards S.W., Lloyd D. Changes in oxygen uptake rates, enzyme activities, cytochrome amounts and adenine nucleotide pool levels during growth of *Acanthamoeba castellanii* in batch culture. - J. gen. Microbiol., 1977, v.102, N.1, p.135-144.
- Edwards S.W., Lloyd D. Cyanide-insensitive respiration in *Acanthamoeba castellanii*. Changes in sensitivity of whole cell respiration during exponential growth. - J. gen. Microbiol., 1977, v.103, N.2, p.207-213.
- Eichel H.J. The effect of X-irradiation on nuclease activity and respiration on *Tetrahymena geleii* W. - Biol. Bull., 1953, v.104, N.3, p.351-358.
- Evans E.A. Enzyme systems operating within the malarial parasite. Fed. Proc., 1946, v.5, N.3, p.390-396.
- Fenchel T.B., Finlay J. Respiration rates in heterotrophic, free-living protozoa. - Microb. Ecol., 1983, v.9, p. 99-122.



- Fulton J.D. Experiments on the utilization of sugars by malarial parasites (*Plasmodium knowlesi*). - Ann. trop. Med. Parasit., 1939, v.33, N.3-4, p.217-227.
- Fulton J.D., Joyner L.P. Studies on Protozoa. I. The metabolism of Leishman-Donovan bodies and flagellates of *Leishmania donovani*. - Trans. Roy. Soc. Trop. Med. Hyg., 1949, v.43, N.3, p.273-286.
- Ghosh B.K., Chatterjee A.N. Action of an antifungal antibiotic, Nystatin, on the protozoa *Leishmania donovani*. I. Studies on the metabolism of *Leishmania donovani*. - Ann. Biochem. exp. Med., Calcutta, 1961, v.21, N.10, p.307-322.
- Greenblatt C.L., Glaser P. Temperature effect on *Leishmania enriettii* in vitro. - Exp. Parasit., 1965, v.16, N.1, p.36-52.
- Gregg J.H. Oxygen utilization in relation to growth and morphogenesis of the slime mold *Dictyostelium discoideum*, - J. exp. Zool., 1950, v.114, N.1, p.173-196.
- Griffiths A.J., Hughes D.E. Starvation and encystment of a soil amoeba *Hartmanella castellanii*. - J. Protozool., 1968, v.15, N.4, p.673-677.
- Hamburger K., Zeuthen E. Synchronous divisions in *Tetrahymena pyriformis* as studied in an inorganic medium. The effect of 2,4-dinitrophenol. - Exp. Cell Res., 1957, v.13, N.3, p.443-453.
- Hamburger K., Zeuthen E. Respiratory responses to dissolved food of starved, normal and division-synchronized *Tetrahymena* cells. - Comp. Rend. Trav. Lab. Carlsberg, 1971, v.38, N.9, p.145-161.
- Holter H. The function of cell inclusions in the metabolism of *Chaos chaos*. - Ann. New York Acad. Sci., 1950, v.50, N.8, p.1000-1009.
- Holter H., Zeuthen E. Metabolism and reduced weight in starving *Chaos chaos*. - Comp. Rend. Trav. Lab. Carlsberg, 1948, v.26, N.9, p.277-296.
- Holz G.G. The oxidative metabolism of a cryptomonad flagellate, *Chilomonas paramecium*. - J. Protozool., 1954, v.1, N.2, p.114-120.
- Holwill M.E.J. The motion of *Strigomonas oncopelti*. - J. exp. Biol., 1965, v.42, p. 124-137.
- Howland R.B., Bernstein A. A method of determining the oxygen consumption of a single cell. - J. gen. Physiol., 1931, v.14, N.3, p.339-348.
- Hunter F.R. Aerobic metabolism of *Crithidia fasciculata*. - Exp. Parasit., 1960, v.9, N.3, p.271-230.
- Hunter P.R., Cosgrove W.B. Aerobic metabolism of *Crithidia fasciculata*. - J. Protozool., 1956, v.3, Suppl., p.12.
- Hunter P.R., Lee J.W. On the metabolism of *Astasia longa* (Jahn.), - J. Protozool., 1962, v.9, N.1, p.74-78.
- Hutchens J.O., Podolsky B., Morales M.P. Studies on the kinetics and energetics of carbon and nitrogen metabolism of *Chilomonas paramecium*. - J. cell. comp. Physiol., 1948, v.32, N.2, p.117-141.
- Khlebovitch T.V. Determination of respiration intensity in infusoria with use of Cartesian diver. In: "Energetic aspects of growth and metabolism of aquatic animals". Kiev: Naukova dumka, 1972, p.227. (in Russian)
- Khlebovitch T.V. Respiration intensity in infusoria of different sizes. - Tsitologiya, 1974, v.16, N.1, p.103-106. (in Russian)
- Laybourn J. Respiratory energy losses in *Stentor coeruleus* Ehrenberg (Ciliophora). - Oecologia, 1975, v.21, N.3, p.273-278.
- Laybourn J., Finlay B.J. Respiratory energy losses related to cell weight and temperature in ciliated Protozoa. - Oecologia, 1976, v.24, N.4, p.349-355.

- Lee C.M., Barlow B.M. Trypanosoma lewisi: oxygen uptake by whole cells and trypanosomal mitochondria. - Inter. J. Biochem., 1972, v.3, N.18, p.665-670.
- Leiner M., Schweikhardt F., Blaschke G., König K., Fischer M. Die Gärung und Atmung von Pelomyxa palustris Greeff. - Biol. Z., 1968. Bd.87, H.5. S. 567-591.
- Levine M., Howard J.L. Respiratory studies on mate-killers and sensitives of Paramecium aurelia, variety 8. - Science, 1955. v.121, N.3140, p.336-337.
- Liddel G.V., Wright B.E. The effect of glucose on respiration of the differentiating slime mold. - Develop. Biol., 1961, v.3, N.3, p.265-276.
- Lincicome D.R., Hill G.C. Oxygen uptake by Trypanosoma lewisi complex cells. I. "L" isolate. - Comp. Biochem. Physiol., 1965, v.14, N.3, P.425-435.
- Lincicome D.R., Lee C.M. Trypanosoma lewisi: physiologic adaptation of wild isolate to albino rats evidenced by cell populations and respiratory. - Exp. Parasit., 1971, v.29, N.2. p.179-193.
- Lincicome D.R., Smith A.S. Oxygen consumption of two isolates of Trypanosoma lewisi. - J. Parasit., 1964, v.50, N.3, Suppl., p.57.
- Lincicome D.R., Smith A.S. Oxygen uptake by Trypanosoma lewisi - complex cells. II. R and L isolates compared. - Comp. Biochem. Physiol., 1966, v.17, N.1, p.59-68.
- Lincicome D.R., Warsi A.A. Oxygen uptake by two isolates of Trypanosoma lewisi. - J. Parasit., 1965, v.51, N.2, Sect.2, p.27.
- Lincicome D.R., Warsi A.A. Oxygen uptake by Trypanosoma lewisi complex cells. III. C isolate. - Comp. Biochem. Physiol., 1966, v.17, N.3, p.871-381.
- Lincicome D.R., Warsi A.A., Lee O.K. Oxygen uptake by Trypanosoma lewisi - complex cells. 4. "E" and "Sp" isolates. - Exp. Parasit., 1968, v.23, N.1, p.114-127.
- Lund B.J. Quantitative studies on intracellular respiration. III. Relation of the state of nutrition of Paramecium to the rate of intracellular oxidation. - Amer. J. Physiol., 1918, v.47, N.2. p.167-177.
- Lwoff M. Sur la respiration due cilié Glaucoma piriformis. - Comp. Rend. Soc. Biol., 1934, v.115, p.237-241.
- Maier J., Coggeshall L.T. Respiration of malaria plasmodia. - J. inf. Dis., Chicago, 1941, v.69, N.1, p.87-96.
- Makarieva A.M., Gorshkov V.G., Li B.-L. Energetics of the smallest: Do bacteria breathe at the same rate as whales? - Proceedings of the Royal Society of London, Biological Series, 2005, v.272. p. 2219-2224.
- Marshall P.B. The metabolism of protozoal parasites. - Brit. Sci. News, 1948, v.1, N.8, p.16-19.
- Marshall P.B. The glucose metabolism of Plasmodium gallinaceum, and the action of antimalarial agents. - Brit. J. Pharmacol, 1948, v.3, N.1, p.1-7.
- Mast S.O., Pace D.M., Mast L.R. The effect of sulfur on the rate of respiration and the respiratory quotient in Chilomonas paramecium. - J. cell. comp. Physiol., 1936, v.8, N.2, p.125-139.
- McKee R.W., Ormsbee R.A., Anfinson C.B., Geiman Q.M., Ball E.G. Studies on malarial parasites. VI. The chemistry and metabolism of normal and parasitised (P. knowlesi) monkey blood. - J. exp. Med., 1946, v.84, N.6, p.569-582.
- Montalvo F.E., Reeves R.E., Warren L.G. Aerobic and anaerobic metabolism in Entamoeba histolytica. - Exp. Parasit., 1971, v.30, N.2, p.249-256.

- Nakamura M., Anderson H.H. Effect of heat-treatment on the respiration of *Trypanosoma cruzi* used for the cultivation of *Endamoeba histolytica*. - Amer. J. trop. Med., 1951, v.31, N.4, p.438-441.
- Neff R.J., Neff R.H., Taylor R.E. The nutrition and metabolism of a soil amoeba, *Acanthamoeba* sp. - Physiol. Zool., 1958, v.31, N.1, p.73-91.
- Nicol J.A.C. The biology of marine animals. London: Pitman, 1960.
- Ormsbee R.A. The normal growth and respiration of *Tetrahymena geleii*. - Biol. Bull., 1942, v.82, N.3, p.423-437.
- Ottova L. The dependence of the consumption of oxygen of the ciliate *Tetrahymena geleii* Fung, on some biological, chemical and physical factors. - Vestnik Českosl. spol. zool. Praha, 1955, v.19, N.3, p.269-286.
- Pace D.M. The effect of cyanide on respiration in *Paramecium caudatum* and *Paramecium aurelia*. - Biol. Bull., 1945, v.89, N.1, p.76-83.
- Pace D.M., Belda W.H. The effect of food content and temperature on respiration in *Pelomyxa carolinensis* Wilson. - Biol. Bull., 1944, v.86, N.3, p.146-153.
- Pace D.M., Belda W.H. The effect of potassium cyanide, potassium arsenite, and ethyl urethane on respiration in *Pelomyxa carolinensis*. - Biol. Bull., 1944, v.87, N.2, p.138-144.
- Pace D.M., Frost B.L. The effects of ethyl alcohol on growth and respiration in *Pelomyxa carolinensis* and upon conjugation in *Paramecium caudatum*. - Anat. Rec., 1948, v.101, N.4, p.730.
- Pace D.M., Kimura K.K. The effect of temperature on respiration in *Paramecium aurelia* and *Paramecium caudatum*. - J. cell. comp. Physiol., 1944, v.24, N.2, p.173-183.
- Pace D.M., Kimura T.E. Relation between metabolic activity and cyanide inhibition in *Pelomyxa carolinensis* Wilson. - Proc. Soc. exp. Biol. Med., 1946, v.62, N.2, p.223-227.
- Pace D.M., Lyman E.D. Oxygen consumption and carbon dioxide elimination in *Tetrahymena geleii* Furgason. - Biol. Bull., 1947, v.92, N.2, p.210-216.
- Pace D.M., McCashland B.W. Effects of low concentration of cyanide on growth and respiration in *Pelomyxa carolinensis* Wilson. - Proc. Soc. exp. Biol. Med., 1951, v.76, N.1, p.165-168.
- Padilla G.M. Cyclical changes in the respiratory activity of synchronized cells. - J. Protozool., 1960, v.7, N.3, Suppl., p.24.
- Padilla G.M., James T.W. Synchronization of cell division in *Astasia longa* on a chemically defined medium. - Exp. Cell Res., 1960, v.20, N.2, p.401-415.
- Pigon A. Respiration and respiratory enzymes in Infusoria. II. *Spirostomum minus* Roax, *Spirostomum intermedium* Kahl. - Folia biol. Warszawa, 1955, v.3, N.3, p.229-265.
- Pitts R.A. The effect of cyanide on respiration of the protozoan, *Colpidium campylum*. - Proc. Soc. exp. Biol. Med., 1932, v.29, N.5, p.542-544.
- Rajagopal P.K. Respiration of some marine planktonic organisms. - Proc. Indian Acad. Sci., 1962, v.55B, N.2, p.76-81.
- Read C.P., Rothman A.H. Preliminary notes on the metabolism of *Trichomonas vaginalis*. - Amer. J. Hyg., 1955, v.61, N.2, p.249-260.
- Reeves R.E. Carbohydrate metabolism in *Entamoeba histolytica*. - In: Comparative Biochemistry of Parasites (Ed. H. van den Boossche). New York: Acad. Press, 1971, p.351-358.

- Reich K. Studies in the respiration of an Amoeba, *Mayorella palestinesis*. - *Physiol. Zool.*, 1948, v.21, N.4, p.390-412.
- Roth J.S., Eichel H.J. The effect of X-radiation on enzyme systems of *Tetrahymena pyriformis*. - *Biol. Bull.*, 1955, v.108, N.3, p.308-317.
- Roth J.S., Eichel H.J., Ginter E. The oxidation of amino acids by *Tetrahymena pyriformis* W. - *Arch. Biochem. Biophys.*, 1954, v.48, N.1, p.112-119.
- Ryley J.F. Studies on the metabolism of the Protozoa. I. Metabolism of the parasitic flagellate, *Trypanosoma lewisi*. - *Biochem. J.*, 1951, v.49, N.5, p. 577-585.
- Ryley J.F. Studies on the metabolism of the Protozoa. 3. Metabolism of the ciliate *Tetrahymena pyriformis* (*Glaucoma pyriformis*). - *Biochem. J.*, 1952, v.52, N.3, p.483-492.
- Ryley J.F. Carbohydrate metabolism in Protozoa and metal-binding substances. - *Nature*, 1953, v.171, N.4356, p.747-748.
- Ryley J.F. Studies on the metabolism of the Protozoa. 5. Metabolism of the parasitic flagellate, *Strigomonas oncopelti*. - *Biochem. J.*, 1955a, v.59, N.3, p. 353-361.
- Ryley J.F. Studies on the metabolism of the Protozoa. 5. Metabolism of the parasitic flagellate, *Trichomonas foetus*. - *Biochem. J.*, 1955b, v.59, N.3, p. 361-369.
- Ryley J.F. Studies on the metabolism of the Protozoa. 7. Comparative carbohydrate metabolism of eleven species of *Trypanosoma*. - *Biochem. J.*, 1956, v.62, N.2, p.215-222.
- Sanchez G., Dusanic D.G. Respiratory activity of *Trypanosoma lewisi* during several phases of infection in the rat. - *Exp. Parasit.*, 1968, v.23, N.3, p.361-370.
- Sarojini R., Nagabhushanam R. The oxygen consumption of the ciliate, *Coleps hirtus*. - *Brotéria*, 1966, Ser. Ciênc. Nat., v.35, p.45-55.
- Scholander P.F., Claff C.L., Sveinsson S.L. Respiratory studies of single cells. II. Observations on the oxygen consumption in single protozoans. - *Biol. Bull.*, 1952, v.102, N.2, p.178-184.
- Seaman G.R. The presence of the tricarboxylic acid cycle in the ciliate, *Colpidium campylum*. - *Biol. Bull.*, 1949, v.96, N.3, p.257-262.
- Seaman G.R. Utilization of acetate by *Tetrahymena geleii* (S). - *J. biol. Chem.*, 1950, v.186, N.1, p. 97-104.
- Seaman G.R., Houlihan R.K. Trans-1,2-cyclopentanedicarboxylic acid, a succinic acid analog affecting the permeability of the cell membrane. - *Arch. Biochem.*, 1950, v.26, N.3, p.436-441.
- Simonsen D.H., Van Wagendonk W.J. Respiratory studies on *Paramecium aurelia*, variety 4, killers and sensitives.- *Biochim. Biophys. Acta*, 1952, v.9, N.5, p.515-527.
- Smith B.F., Herrick C.A. The respiration of the protozoan parasite, *Eimeria tenella*. - *J. Parasit.*, 1944, v.30, N.5, p.295-302.
- Speck J.F., Moulder J.W., Evans E.A. The biochemistry of the malaria parasite. V. Mechanism of pyruvate oxidation in the malaria parasite. - *J. biol. Chem.*, 1946, v.164, N.1, p.119-144.
- Thurston J.P. The oxygen uptake of *Trypanosoma lewisi* and *Trypanosoma equiperdum*, with especial reference to oxygen consumption in the presence of amino-acids. - *Parasitology*, 1958, v.48, N.1-2, p.149-164.
- Van de Vijver G. Studies on the metabolism of *Tetrahymena pyriformis* Gl. I. Influence of substrates on the respiratory rate. - *Enzymologia*, 1966, v.31, N.6, p.363-381.
- Vernberg W.B., Coull B.C. Respiration of an interstitial ciliate and benthic energy relationships. - *Oecologia*, 1974, v.16, N.4, p.259-264.

- Vladimirova I.G., Zotin A.I. Respiration rates of Protozoa. Manuscript No. 5500-B3 12.08.1983 deposited in the All-Russian Institute of Scientific and Technical Information (VINITI), 62 pp, 1983. (in Russian)
- Vladimirova I.G., Zotin A.I. Dependence of metabolic rate in Protozoa on body temperature and weight. - Zhurnal Obschei Biologii [Journal of General Biology], 1985, v.46, p.165-173. (in Russian)
- von Brand T., Agosin M. The utilization of Krebs cycle intermediates by the culture forms of *Trypanosoma cruzi* and *Leishmania tropica*. - J. inf. Dis., 1955, v.97, N.3, p.274-279.
- von Dach H. Respiration of a colorless flagellate, *Astasia klebsii*. - Biol. Bull., 1942, v.82, N.3, p.356-371.
- von Dach H. Effect of high osmotic pressures on growth and respiration of a fresh-water flagellate, *Astasia klebsii*. - J. exp. Zool., 1950, v.115, N.1, p.1-15.
- Wagenbach G.E., Burns W.C. Structure and respiration of sporulating *Eimeria stiedae* and *E. tenella* oocysts. - J. Protozool., 1969, v.16, N.2, p.257-263.
- Waidyasekera F.L.D., Kitching J.A. Oxygen consumption and Krebs cycle activity of *Acanthamoeba castellanii* at high hydrostatic pressure. - Arch. Protistenk., 1975, v.117, N.3, p.314-319.
- Weinbach E.C., Diamond L.S. *Entamoeba histolytica*: I. Aerobic metabolism. - Exp. Parasit., 1974, v.35, N.2, p.232-242.
- Whiteley A.H. Interactions of nucleus and cytoplasm in controlling respiratory patterns in regenerating *Stentor coeruleus*. - Comp. Rend. Trav. Lab. Carlsberg, 1960, v.32, N.4, p.49-62.
- Wilson B.W. The oxidative assimilation of acetate by *Astasia longa* and the regulation of cell respiration. - J. cell. comp. Physiol., 1963, v.62, N.1, p.49-56.
- Wilson B.W., James T.W. The respiration and growth of synchronised populations of the cell *Astasia longa*. - Exp. Cell Res., 1963, v.32, N.2, p.305-319.
- Wilson P.A.G., Fairbairn D. Biochemistry of sporulation in oocysts of *Eimeria acervulina*. - J. Protozool. 1961, v.8, N.4, p.410-416.
- Wirtschafter S., Saltman P., Jahn T.L. The metabolism of *Trichomonas vaginalis*: the oxidative pathway. - J. Protozool., 1956, v.3, N.2, p.86-88.
- Wright B.E. Biochemistry of acrasiales. - In: Biochemistry and Physiology of Protozoa (Ed. S.H. Hutner). New York: Acad. Press, 1964, v.3, p.341-381.
- Zeledon R. Comparative physiological studies on four species of Hemoflagellates in culture. I. Endogenous respiration and respiration in the presence of glucose. - J. Protozool., 1960, v.7, N.2, p.146-150.
- Zeledon R. Comparative physiological studies on four species of Hemoflagellates in culture. II. Effect of carbohydrates and related substances and some amino compounds on the respiration. - J. Parasit., 1960, v.46, N.5, p.541-551.
- Zeledon R. Comparative physiological studies on four species of Hemoflagellates in culture. III. Effect of Krebs cycle intermediates on the respiration. - Rev. Biol. trop. Univ., Costa Rica, 1960, v.8, N.1, p.25-33.
- Zeledon R. Comparative physiological studies on four species of Hemoflagellates in culture. IV. Effect of metabolic inhibitors on respiration. - Rev. Biol. trop. Univ., Costa Rica, 1960, v.8, N.2, p.181-195.

Zeledon R., de Monge E. Physiological studies on *Leishmania braziliensis*. – In: Internat. Congr. Parasitology (Ed. A. Corradetii). Oxford: Pergamon Press, 1966, v.1, p.42-43.

Zeledon R., de Monge E. Physiological studies on the culture form of four strains of *Leishmania braziliensis*. I. Nitrogen content, substrate utilization, and effect of metabolic inhibitors on respiration and its relation to infectivity. - J. Parasit., 1967, v.53, N.5, p.937-945.

Table **S2b**. Species' minimum endogenous respiration rates used in the analyses presented in Table 1 and Figures 1-3 in the paper

Note that when converting dry mass to wet mass both Vladimirova & Zotin (1983, 1985) and Fenchel & Finlay (1983) used a DM/WM ratio of 0.14. To convert the data to the reference DM/WM = 0.3 (crude mean for all taxa applied in the analysis (see SI Methods, Table S12a)), qWkg values from these sources were multiplied by a factor of 2. (The mean protozoan metabolic rate of  $7.5 \text{ W kg}^{-1}$  reported in Table 1 represent therefore a conservative estimate in that sense that per unit wet mass these small-sized species have an even lower metabolic rate than the mean of  $7.5 \text{ W kg}^{-1}$ .) After this, temperature conversion was performed from 20 to 25 °C using  $Q_{10} = 2$ ,  $q_{25\text{Wkg}} = q\text{Wkg} \times 2^{(25 - TC)/10}$ , dimension  $\text{W (kg WM)}^{-1}$ . Note on temperature conversion: For unicells the interspecific comparisons by Robinson et al. (1983) [Robinson W.R., Peters R.H., Zimmermann J. (1983) The effects of body size and temperature on metabolic rate of organisms. Canadian Journal of Zoology 61, 281-288] yielded a  $Q_{10}$  of 1.6, although the temperature dependence was statistically insignificant. Vladimirova & Zotin (1985), based on the intraspecifically established formula  $q/q_{20} = 0.166\exp(0.087 T)$ , where  $q_{20}$  is metabolic rate at 20 °C and  $T$  is temperature in °C. It corresponds to  $Q_{10} = 2.4$ . Fenchel & Finlay (1983) used  $Q_{10} = 2$  in the analysis of their extensive compilation of protozoan metabolic rates. Thus, we chose  $Q_{10} = 2$  as a representative value for unicells.

The values of  $q_{25\text{Wkg}}$  (a total of 52 values for 52 species) were used in our analysis. Log stands for the decimal logarithms of the corresponding variables. See Table **S2a** for other notations.

| Species                                                        | qWkg | LogqWkg | TC | q25Wkg | Logq25Wkg | Mpg      | LogMpg |
|----------------------------------------------------------------|------|---------|----|--------|-----------|----------|--------|
| 1. <i>Acanthamoeba</i> (Hartmanella) <i>castellani</i>         | 3.8  | 0.580   | 20 | 10.740 | 1.031     | 6700     | 3.826  |
| 2. <i>Acanthamoeba</i> sp.                                     | 5.3  | 0.724   | 20 | 14.990 | 1.176     | 4320     | 3.635  |
| 3. <i>Actinosphaerium eichhornii</i>                           | 0.4  | -0.398  | 20 | 1.132  | 0.054     | 14561000 | 7.163  |
| 4. <i>Amoeba proteus</i>                                       | 1    | 0.000   | 20 | 2.828  | 0.451     | 900000   | 5.954  |
| 5. <i>Astasia klebsii</i>                                      | 1.8  | 0.255   | 20 | 5.092  | 0.707     | 3800     | 3.580  |
| 6. <i>Astasia longa</i>                                        | 2.9  | 0.462   | 20 | 8.202  | 0.914     | 13500    | 4.130  |
| 7. <i>Bresslaueria insidiatrix</i>                             | 21.7 | 1.336   | 20 | 61.376 | 1.788     | 17000    | 4.230  |
| 8. <i>Chilomonas paramecium</i>                                | 16   | 1.204   | 20 | 45.254 | 1.656     | 2260     | 3.354  |
| 9. <i>Coleps hirtus</i>                                        | 4.2  | 0.623   | 20 | 11.880 | 1.075     | 91000    | 4.959  |
| 10. <i>Colpidium campylum</i>                                  | 10.8 | 1.033   | 20 | 30.548 | 1.485     | 54400    | 4.736  |
| 11. <i>Crithidia</i> ( <i>Strigomonas</i> ) <i>fasciculata</i> | 7.3  | 0.863   | 20 | 20.648 | 1.315     | 2078     | 3.318  |
| 12. <i>Crithidia</i> ( <i>Strigomonas</i> ) <i>oncopelti</i>   | 10   | 1.000   | 30 | 7.071  | 0.849     | 30       | 1.477  |

|                                         |      |        |    |         |        |           |       |
|-----------------------------------------|------|--------|----|---------|--------|-----------|-------|
| 13. Dictyostelium discodeum             | 4.9  | 0.690  | 20 | 13.860  | 1.142  | 840       | 2.924 |
| 14. Eimeria acervulina                  | 2.0  | 0.301  | 20 | 5.656   | 0.753  | 2640      | 3.422 |
| 15. Eimeria stiedae                     | 2.5  | 0.398  | 20 | 7.072   | 0.850  | 7980      | 3.902 |
| 16. Eimeria tenella                     | 2.3  | 0.362  | 20 | 6.506   | 0.813  | 5440      | 3.736 |
| 17. Endotrypanum schaudinni             | 0.84 | -0.076 | 20 | 2.376   | 0.376  | 114       | 2.057 |
| 18. Entamoeba histolytica               | 0.4  | -0.398 | 20 | 1.132   | 0.054  | 8600      | 3.934 |
| 19. Frontonia leucas                    | 0.4  | -0.398 | 20 | 1.132   | 0.054  | 745000    | 5.872 |
| 20. Leishmania brasiliensis             | 20   | 1.301  | 20 | 56.568  | 1.753  | 9         | 0.954 |
| 21. Leishmania donovani                 | 9.3  | 0.968  | 20 | 26.304  | 1.420  | 18        | 1.255 |
| 22. Leishmania enrietti                 | 7.0  | 0.845  | 20 | 19.798  | 1.297  | 12        | 1.079 |
| 23. Mayorella palestinensis             | 3.7  | 0.568  | 20 | 10.466  | 1.020  | 8300      | 3.919 |
| 24. Noctiluca miliaris                  | 1.4  | 0.146  | 20 | 3.960   | 0.598  | 223986000 | 8.350 |
| 25. Paramecium aurelia                  | 2.9  | 0.462  | 20 | 8.202   | 0.914  | 160000    | 5.204 |
| 26. Paramecium calkinsi                 | 3.4  | 0.531  | 20 | 9.616   | 0.983  | 157000    | 5.196 |
| 27. Paramecium caudatum                 | 0.2  | -0.699 | 20 | 0.566   | -0.247 | 526000    | 5.721 |
| 28. Paramecium multimicronucleatum      | 5.3  | 0.724  | 20 | 14.990  | 1.176  | 685000    | 5.836 |
| 29. Pelomyxa carolinensis               | 0.5  | -0.301 | 20 | 1.414   | 0.150  | 49708000  | 7.696 |
| 30. Pelomyxa palustris                  | 0.7  | -0.155 | 20 | 1.980   | 0.297  | 90000000  | 7.954 |
| 31. Plasmodium cathemerium              | 1.8  | 0.255  | 20 | 5.092   | 0.707  | 54        | 1.732 |
| 32. Plasmodium gallinaceum              | 0.8  | -0.097 | 20 | 2.262   | 0.354  | 71        | 1.851 |
| 33. Plasmodium knowlesi                 | 0.9  | -0.046 | 20 | 2.546   | 0.406  | 59        | 1.771 |
| 34. Pleuromonas jaculans                | 12   | 1.079  | 20 | 33.942  | 1.531  | 25        | 1.398 |
| 35. Podophrya fixa                      | 2.9  | 0.458  | 20 | 8.202   | 0.914  | 14900     | 4.173 |
| 36. Schizotrypanum verpertilionis       | 2.1  | 0.322  | 20 | 5.940   | 0.774  | 108       | 2.033 |
| 37. Spirostoma minus                    | 3.4  | 0.531  | 20 | 9.616   | 0.983  | 500000    | 5.699 |
| 38. Spirostomum ambiguum                | 5.9  | 0.771  | 20 | 16.688  | 1.222  | 12000000  | 7.079 |
| 39. Spirostomum intermedium             | 1.2  | 0.079  | 20 | 3.394   | 0.531  | 229000    | 5.360 |
| 40. Spirostomum teres                   | 0.5  | -0.301 | 20 | 1.414   | 0.150  | 423000    | 5.626 |
| 41. Stentor coeruleus                   | 1.8  | 0.255  | 20 | 5.092   | 0.707  | 1100000   | 6.041 |
| 42. Tetrahymena geleii (pyriformis)     | 5.9  | 0.771  | 20 | 16.688  | 1.222  | 22000     | 4.342 |
| 43. Tetrahymena pyriformis              | 6.1  | 0.785  | 20 | 17.254  | 1.237  | 49000     | 4.690 |
| 44. Tracheloraphis sp.                  | 16.0 | 1.204  | 20 | 45.254  | 1.656  | 340000    | 5.531 |
| 45. Trichomonas (Tritrichomonas) foetus | 2.7  | 0.431  | 20 | 7.636   | 0.883  | 580       | 2.763 |
| 46. Trichomonas batrachorum             | 1.9  | 0.279  | 20 | 5.374   | 0.730  | 560       | 2.748 |
| 47. Trichomonas nasai                   | 8.1  | 0.908  | 20 | 22.910  | 1.360  | 210       | 2.322 |
| 48. Trichomonas vaginalis               | 1.0  | 0.000  | 20 | 2.828   | 0.451  | 870       | 2.940 |
| 49. Trypanosoma (Schizotrypanum) cruzi  | 1.2  | 0.079  | 20 | 3.394   | 0.531  | 169       | 2.228 |
| 50. Trypanosoma lewisi                  | 0.9  | -0.046 | 20 | 2.546   | 0.406  | 58        | 1.763 |
| 51. Urostyla grandis                    | 57   | 1.756  | 20 | 161.220 | 2.207  | 166000    | 5.220 |
| 52. Trichosphaerium sieboldi            | 4    | 0.602  | 20 | 5.7     | 0.756  | 100       | 2.000 |
