# Supplementary material
Source: PubMed Central journal article supplement (PMC2579366)
Supplement: 0802148105_DS3_PDF.pdf [file 0802148105_DS3_PDF.pdf]

### Dataset S3. Standard and routine respiration rates in aquatic invertebrates

Standard metabolic rates of insect species are presented. For details of data assembling procedure see Chown, S. L. et al. (2007) Scaling of insect metabolic rate is inconsistent with the nutrient supply network model. *Funct Ecol* 21: 282–290.

Notations:

M is body mass in mg, Q is whole-body standard metabolic rate in  $\mu\text{W}$  at 25 °C.

Analyses presented in Table 1 and Figs. 1-3 in the paper are based on mass-specific standard metabolic rate  $q = (Q / M)$ , dimension  $\text{W kg}^{-1}$ .

| Species                                      | Family         | Order         | M (mg)  | Q ( $\mu\text{W}$ ) |
|----------------------------------------------|----------------|---------------|---------|---------------------|
| Unknown species *                            | Meinertellidae | Archaeognatha | 12.75   | 38.3                |
| Species 1 (Sutherland)*                      | Lepismatidae   | Thysanura     | 23.04   | 36.9                |
| Species 2 (Stellenbosch)*                    | Lepismatidae   | Thysanura     | 26.64   | 23.0                |
| Species 3 (Cederberg)*                       | Lepismatidae   | Thysanura     | 17.80   | 42.3                |
| <i>Anax junius</i> <sup>1</sup>              | Aeschnidae     | Odonata       | 1019.00 | 4148.4              |
| <i>Brachymesia gravida</i> <sup>1</sup>      | Libellulidae   | Odonata       | 344.00  | 1555.6              |
| <i>Erythemis simplicicollis</i> <sup>1</sup> | Libellulidae   | Odonata       | 263.00  | 877.5               |
| <i>Erythrodiplax berenice</i> <sup>1</sup>   | Libellulidae   | Odonata       | 125.00  | 438.8               |
| <i>Erythrodiplax connata</i> <sup>1</sup>    | Libellulidae   | Odonata       | 52.00   | 191.5               |

|                                                    |                 |          |        |        |
|----------------------------------------------------|-----------------|----------|--------|--------|
| <i>Libellula auripennis</i> <sup>1</sup>           | Libellulidae    | Odonata  | 464.00 | 1396.1 |
| <i>Libellula needhami</i> <sup>1</sup>             | Libellulidae    | Odonata  | 518.00 | 1675.3 |
| <i>Miathyria marcella</i> <sup>1</sup>             | Libellulidae    | Odonata  | 17.10  | 765.9  |
| <i>Pachydiplax longipennis</i> <sup>1</sup>        | Libellulidae    | Odonata  | 200.00 | 1765.2 |
| <i>Pantala flavescens</i> <sup>1</sup>             | Libellulidae    | Odonata  | 339.00 | 1675.3 |
| <i>Perithemis tenera</i> <sup>1</sup>              | Libellulidae    | Odonata  | 61.00  | 331.1  |
| <i>Tramea carolina</i> <sup>1</sup>                | Libellulidae    | Odonata  | 383.00 | 1795.0 |
| <i>Coptotermes formosanus</i> <sup>2</sup>         | Rhinotermitidae | Isoptera | 2.95   | 8.1    |
| <i>Heterotermes tenuior</i> <sup>3</sup>           | Rhinotermitidae | Isoptera | 1.40   | 1.9    |
| <i>Reticulitermes flavipes</i> <sup>2</sup>        | Rhinotermitidae | Isoptera | 2.97   | 12.0   |
| <i>Schedorhinotermes javanicus</i> <sup>3</sup>    | Rhinotermitidae | Isoptera | 2.70   | 2.9    |
| <i>Schedorhinotermes sarawakensis</i> <sup>3</sup> | Rhinotermitidae | Isoptera | 8.30   | 17.9   |
| <i>Labritermes kistneri</i> <sup>3</sup>           | Termitidae      | Isoptera | 0.70   | 2.0    |
| <i>Dicuspiditermes nemorosus</i> <sup>3</sup>      | Termitidae      | Isoptera | 3.50   | 1.7    |
| <i>Dicuspiditermes santschii</i> <sup>3</sup>      | Termitidae      | Isoptera | 2.60   | 0.6    |
| <i>Homalotermes eleanorae</i> <sup>3</sup>         | Termitidae      | Isoptera | 2.20   | 1.5    |

|                                                      |            |          |       |      |
|------------------------------------------------------|------------|----------|-------|------|
| <i>Pericapritermes nitobei</i> <sup>3</sup>          | Termitidae | Isoptera | 1.20  | 1.2  |
| <i>Pericapritermes semarangi</i> <sup>3</sup>        | Termitidae | Isoptera | 1.30  | 0.8  |
| <i>Procapritermes nr. sandakanensis</i> <sup>3</sup> | Termitidae | Isoptera | 5.90  | 2.4  |
| <i>Syncapritermes</i> sp. A <sup>3</sup>             | Termitidae | Isoptera | 6.70  | 3.1  |
| <i>Termes borneensis</i> <sup>3</sup>                | Termitidae | Isoptera | 3.00  | 2.1  |
| <i>Globitermes globosus</i> <sup>3</sup>             | Termitidae | Isoptera | 1.90  | 1.4  |
| <i>Prohamitermes mirabilis</i> <sup>3</sup>          | Termitidae | Isoptera | 3.50  | 1.9  |
| <i>Aciculioiditermes</i> sp. A <sup>3</sup>          | Termitidae | Isoptera | 1.80  | 1.8  |
| <i>Bulbitermes</i> sp. C <sup>3</sup>                | Termitidae | Isoptera | 2.80  | 2.3  |
| <i>Havilanditermes atripennis</i> <sup>3</sup>       | Termitidae | Isoptera | 8.00  | 8.0  |
| <i>Hospitalitermes hospitalis</i> <sup>3</sup>       | Termitidae | Isoptera | 7.70  | 5.6  |
| <i>Nasutitermes longinasus</i> <sup>3</sup>          | Termitidae | Isoptera | 2.60  | 1.5  |
| <i>Proaciculitermes</i> sp. A <sup>3</sup>           | Termitidae | Isoptera | 1.10  | 0.8  |
| <i>Proaciculitermes</i> sp. E <sup>3</sup>           | Termitidae | Isoptera | 2.70  | 1.4  |
| <i>Hypotermes xenotermes</i> <sup>3</sup>            | Termitidae | Isoptera | 2.60  | 2.9  |
| <i>Macrotermes carbonarius</i> <sup>4</sup>          | Termitidae | Isoptera | 11.93 | 51.8 |

|                                                |              |           |         |        |
|------------------------------------------------|--------------|-----------|---------|--------|
| <i>Macrotermes gilvus</i> <sup>3</sup>         | Termitidae   | Isoptera  | 7.00    | 5.5    |
| <i>Macrotermes malaccensis</i> <sup>3</sup>    | Termitidae   | Isoptera  | 11.60   | 14.1   |
| <i>Microcerotermes dubius</i> <sup>3</sup>     | Termitidae   | Isoptera  | 2.20    | 2.9    |
| <i>Microcerotermes serrula</i> <sup>3</sup>    | Termitidae   | Isoptera  | 1.90    | 2.2    |
| <i>Blatta orientalis</i> <sup>5</sup>          | Blattidae    | Blattodea | 325.00  | 555.9  |
| <i>Eublaberus posticus</i> <sup>6</sup>        | Blattidae    | Blattodea | 2200.00 | 4219.5 |
| <i>Periplaneta americana</i> <sup>7</sup>      | Blattidae    | Blattodea | 900.00  | 979.4  |
| <i>Periplaneta orientalis</i> <sup>8</sup>     | Blattidae    | Blattodea | 165.00  | 307.9  |
| <i>Blatella germanica</i> <sup>9</sup>         | Blattellidae | Blattodea | 54.76   | 203.3  |
| <i>Byrsotria fumagata</i> <sup>6</sup>         | Blattellidae | Blattodea | 4950.00 | 5584.6 |
| <i>Gromphadorhina chopardi</i> <sup>6</sup>    | Blattellidae | Blattodea | 3400.00 | 2685.1 |
| <i>Gromphadorihna portentosa</i> <sup>10</sup> | Blattellidae | Blattodea | 4950.00 | 4747.0 |
| <i>Parcoblatta</i> sp. <sup>11</sup>           | Blattellidae | Blattodea | 73.00   | 92.0   |
| <i>Blaberus discoidalis</i> <sup>6</sup>       | Blaberidae   | Blattodea | 4080.00 | 3912.6 |
| <i>Blaberus giganteus</i> <sup>12</sup>        | Blaberidae   | Blattodea | 4330.00 | 3646.4 |
| <i>Leucophaea maderae</i> <sup>13</sup>        | Blaberidae   | Blattodea | 2800.00 | 2903.9 |

|                                                |                   |                  |         |        |
|------------------------------------------------|-------------------|------------------|---------|--------|
| <i>Nauphoeta cinerea</i> <sup>13</sup>         | Blaberidae        | Blattodea        | 510.00  | 732.2  |
| <i>Perisphaeria</i> sp. <sup>14</sup>          | Blaberidae        | Blattodea        | 324.10  | 196.8  |
| <i>Sphodromantis gastrica</i> *                | Mantidae          | Mantodea         | 335.70  | 611.6  |
| <i>Karoophasma biedouwensis</i> *              | Austrophasmatidae | Mantophasmatodea | 103.95  | 317.9  |
| <i>Oecanthus quadripunctatus</i> <sup>15</sup> | Gryllidae         | Orthoptera       | 50.00   | 134.3  |
| <i>Enyaliopsis petersi</i> <sup>16</sup>       | Gryllidae         | Orthoptera       | 750.00  | 1525.7 |
| <i>Eugaster loricatus</i> <sup>16</sup>        | Gryllidae         | Orthoptera       | 1580.00 | 1762.1 |
| <i>Hophlosphyrum griseus</i> <sup>17</sup>     | Gryllidae         | Orthoptera       | 36.20   | 79.9   |
| <i>Pteronemobius fasciatus</i> <sup>18</sup>   | Gryllidae         | Orthoptera       | 26.17   | 469.5  |
| <i>Acheta domesticus</i> <sup>19</sup>         | Gryllidae         | Orthoptera       | 369.00  | 1138.6 |
| <i>Teleogryllus commodus</i> <sup>7</sup>      | Gryllidae         | Orthoptera       | 950.00  | 5686.9 |
| <i>Anurogryllis arboreus</i> <sup>15</sup>     | Gryllidae         | Orthoptera       | 310.00  | 550.9  |
| <i>Ceuthophilis fossor</i> <sup>20</sup>       | Gryllacrididae    | Orthoptera       | 70.15   | 817.6  |
| <i>Ceuthophilis gracilipes</i> <sup>11</sup>   | Gryllacrididae    | Orthoptera       | 259.10  | 543.6  |
| <i>Gryllotalpa australis</i> <sup>21</sup>     | Gryllotalpidae    | Orthoptera       | 874.00  | 2235.6 |
| <i>Conocephalus fasciatus</i> <sup>18</sup>    | Tettigoniidae     | Orthoptera       | 51.37   | 717.1  |

|                                                        |               |            |         |        |
|--------------------------------------------------------|---------------|------------|---------|--------|
| <i>Euconocephalus nasutus</i> <sup>22</sup>            | Tettigoniidae | Orthoptera | 650.00  | 1026.7 |
| <i>Insara covilleae</i> <sup>20</sup>                  | Tettigoniidae | Orthoptera | 92.60   | 1633.1 |
| <i>Neoconocephalus robustus</i> <sup>22</sup>          | Tettigoniidae | Orthoptera | 870.00  | 3729.9 |
| <i>Requena verticalis</i> <sup>15</sup>                | Tettigoniidae | Orthoptera | 370.00  | 683.0  |
| <i>Anconia integra</i> <sup>20</sup>                   | Acrididae     | Orthoptera | 816.70  | 2644.1 |
| <i>Boottettix punctatus</i> <sup>20</sup>              | Acrididae     | Orthoptera | 47.01   | 364.7  |
| <i>Encoptolophus s. costalis</i> <sup>23</sup>         | Acrididae     | Orthoptera | 174.60  | 462.6  |
| <i>Locusta migratoria migratorioides</i> <sup>24</sup> | Acrididae     | Orthoptera | 1500.00 | 4934.0 |
| <i>Melanoplus bivittatus</i> <sup>25</sup>             | Acrididae     | Orthoptera | 1650.00 | 5057.0 |
| <i>Melanoplus complanipes</i> <sup>20</sup>            | Acrididae     | Orthoptera | 141.55  | 624.3  |
| <i>Oedalis instillatus</i> <sup>16</sup>               | Acrididae     | Orthoptera | 627.00  | 966.4  |
| <i>Romalea guttata</i> <sup>26</sup>                   | Acrididae     | Orthoptera | 2874.00 | 2696.1 |
| <i>Taeniopoda eques</i> <sup>26</sup>                  | Acrididae     | Orthoptera | 2043.00 | 2462.0 |
| <i>Trimerotropis pallidipennis</i> <sup>27</sup>       | Acrididae     | Orthoptera | 221.35  | 743.3  |
| <i>Trimerotropis saxatilis</i> <sup>28</sup>           | Acrididae     | Orthoptera | 155.00  | 321.8  |
| <i>Trimerotropis</i> sp. <sup>20</sup>                 | Acrididae     | Orthoptera | 145.90  | 1007.5 |

|                                                |                 |            |         |          |
|------------------------------------------------|-----------------|------------|---------|----------|
| <i>Trimerotropis suffusa</i> <sup>27</sup>     | Acrididae       | Orthoptera | 297.50  | 906.2    |
| <i>Xanthippus corallipes</i> <sup>29</sup>     | Acrididae       | Orthoptera | 2302.20 | 7508.5   |
| Unknown genus <sup>16</sup>                    | Acrididae       | Orthoptera | 2948.0  | 1354.6   |
| <i>Tanaocerus koebeli</i> <sup>20</sup>        | Tanaoceridae    | Orthoptera | 102.50  | 625.9    |
| <i>Xiphoceriana</i> sp. <sup>16</sup>          | Acridiidae      | Orthoptera | 1568.00 | 743.0    |
| <i>Euborellia annulipes</i> *                  | Carcinophoridae | Dermaptera | 31.76   | 82.9     |
| Unknown genus <sup>20</sup>                    | Psyllidae       | Hemiptera  | 0.16    | 5.6      |
| <i>Pseudococcus citri</i> <sup>30</sup>        | Pseudococcidae  | Hemiptera  | 1.30    | 11.3     |
| <i>Neophilaenus lineatus</i> <sup>31</sup>     | Cercopidae      | Hemiptera  | 1.91    | 30.6     |
| <i>Philaenus spumarius</i> <sup>32</sup>       | Cercopidae      | Hemiptera  | 3.93    | 59.5     |
| <i>Cystosoma saundersii</i> <sup>33</sup>      | Cicadidae       | Hemiptera  | 1158.00 | 2345.1   |
| <i>Diceroprocta apache</i> <sup>34</sup>       | Cicadidae       | Hemiptera  | 622.00  | 1605.2   |
| <i>Fidicina mannifera</i> <sup>35</sup>        | Cicadidae       | Hemiptera  | 2840.00 | 9689.906 |
| <i>Multareoides bifurcatus</i> <sup>20</sup>   | Membracidae     | Hemiptera  | 1.34    | 15.2     |
| <i>Hysteropterum</i> sp. <sup>20</sup>         | Issidae         | Hemiptera  | 1.71    | 40.3     |
| <i>Phytocoris nigripubescens</i> <sup>20</sup> | Miridae         | Hemiptera  | 1.27    | 30.8     |

|                                               |               |             |        |        |
|-----------------------------------------------|---------------|-------------|--------|--------|
| <i>Slaterocoris</i> sp. <sup>20</sup>         | Miridae       | Hemiptera   | 0.86   | 17.2   |
| Unknown genus <sup>20</sup>                   | Miridae       | Hemiptera   | 0.51   | 12.0   |
| Unknown genus <sup>20</sup>                   | Miridae       | Hemiptera   | 3.56   | 72.9   |
| Unknown genus <sup>20</sup>                   | Miridae       | Hemiptera   | 3.85   | 35.0   |
| <i>Rhodnius prolixus</i> <sup>36</sup>        | Reduviidae    | Hemiptera   | 66.75  | 92.7   |
| Unknown genus <sup>20</sup>                   | Nabidae       | Hemiptera   | 1.89   | 25.9   |
| <i>Dendrocoris contaminatus</i> <sup>20</sup> | Pentatomidae  | Hemiptera   | 11.00  | 26.2   |
| Unknown genus <sup>20</sup>                   | Coreidae      | Hemiptera   | 66.70  | 410.5  |
| <i>Lygus kalmii</i> <sup>20</sup>             | Lygaeidae     | Hemiptera   | 10.17  | 146.3  |
| Unknown genus <sup>20</sup>                   | Neididae      | Hemiptera   | 0.95   | 28.1   |
| <i>Corydalid cornutus</i> <sup>37</sup>       | Corydalidae   | Megaloptera | 326.00 | 4724.5 |
| <i>Saprinus</i> sp. <sup>20</sup>             | Histeridae    | Coleoptera  | 8.21   | 65.4   |
| <i>Sphaeridium lunatum</i> <sup>38</sup>      | Hydrophilidae | Coleoptera  | 34.00  | 175.5  |
| Species 3 <sup>39</sup>                       | Staphilinidae | Coleoptera  | 0.089  | 0.34   |
| Species 2 <sup>39</sup>                       | Carabidae     | Coleoptera  | 0.89   | 1.34   |
| <i>Reichebnachia</i> sp. <sup>39</sup>        | Pselaphidae   | Coleoptera  | 0.077  | 0.82   |



|                                            |              |            |         |        |
|--------------------------------------------|--------------|------------|---------|--------|
| <i>Popilius disjunctus</i> <sup>11</sup>   | Passalidae   | Coleoptera | 1630.50 | 1611.6 |
| <i>Popilius</i> sp. <sup>40</sup>          | Passalidae   | Coleoptera | 563.00  | 799.4  |
| <i>Omorgus radula</i> <sup>41</sup>        | Trogidae     | Coleoptera | 207.00  | 114.1  |
| <i>Geotrupes</i> sp. <sup>39</sup>         | Geotrupiidae | Coleoptera | 160.30  | 679.8  |
| <i>Geotrupes spiniger</i> <sup>38</sup>    | Geotrupidae  | Coleoptera | 825.00  | 4946.1 |
| <i>Aphodius contaminatus</i> <sup>38</sup> | Aphodiidae   | Coleoptera | 14.00   | 103.7  |
| <i>Aphodius fossor</i> <sup>42</sup>       | Aphodiidae   | Coleoptera | 121.30  | 268.8  |
| <i>Aphodius rufipes</i> <sup>38</sup>      | Aphodiidae   | Coleoptera | 84.00   | 382.9  |
| <i>Aphodius distinctus</i> <sup>43</sup>   | Scarabaeidae | Coleoptera | 7.80    | 104.9  |
| <i>Aphodius fimetarius</i> <sup>43</sup>   | Scarabaeidae | Coleoptera | 30.90   | 187.3  |
| <i>Aphodius prodromus</i> <sup>43</sup>    | Scarabaeidae | Coleoptera | 13.80   | 167.0  |
| <i>Aphodius rufus</i> <sup>43</sup>        | Scarabaeidae | Coleoptera | 209.00  | 170.4  |
| <i>Anomala</i> sp. <sup>40</sup>           | Scarabaeidae | Coleoptera | 100.00  | 137.0  |
| <i>Pelidnota</i> sp. <sup>40</sup>         | Scarabaeidae | Coleoptera | 1091.50 | 1511.5 |
| <i>Coeloesis biloba</i> <sup>40</sup>      | Scarabaeidae | Coleoptera | 3735.00 | 3724.2 |
| <i>Strategus aloeus</i> <sup>40</sup>      | Scarabaeidae | Coleoptera | 5050.00 | 5149.6 |

|                                             |              |            |         |        |
|---------------------------------------------|--------------|------------|---------|--------|
| <i>Cyclocephala</i> sp. <sup>40</sup>       | Scarabaeidae | Coleoptera | 246.00  | 592.5  |
| <i>Dyscinetus</i> sp. <sup>40</sup>         | Scarabaeidae | Coleoptera | 390.00  | 469.6  |
| <i>Phileurus</i> sp. <sup>40</sup>          | Scarabaeidae | Coleoptera | 3501.00 | 1562.6 |
| <i>Sisiphys fasciculatus</i> <sup>44</sup>  | Scarabaeidae | Coleoptera | 136.00  | 375.1  |
| <i>Anachalcos convexus</i> <sup>44</sup>    | Scarabaeidae | Coleoptera | 1421.00 | 1539.8 |
| <i>Circellium bacchus</i> <sup>44</sup>     | Scarabaeidae | Coleoptera | 7285.00 | 4017.3 |
| <i>Pachylomerus femoralis</i> <sup>45</sup> | Scarabaeidae | Coleoptera | 4915.00 | 4282.2 |
| <i>Scarabaeus flavicornis</i> <sup>44</sup> | Scarabaeidae | Coleoptera | 322.00  | 483.7  |
| <i>Scarabaeus galenus</i> <sup>46</sup>     | Scarabaeidae | Coleoptera | 1681.00 | 881.7  |
| <i>Scarabaeus westwoodi</i> <sup>47</sup>   | Scarabaeidae | Coleoptera | 1780.00 | 1324.7 |
| <i>Scarabaeus rusticus</i> <sup>47</sup>    | Scarabaeidae | Coleoptera | 1070.00 | 696.2  |
| <i>Scarabaeus gariepinus</i> <sup>47</sup>  | Scarabaeidae | Coleoptera | 1140.00 | 288.0  |
| <i>Scarabaeus striatum</i> <sup>47</sup>    | Scarabaeidae | Coleoptera | 790.00  | 282.6  |
| <i>Scarabaeus hippocrates</i> <sup>47</sup> | Scarabaeidae | Coleoptera | 2010.00 | 622.1  |
| <i>Pleocoma australis</i> <sup>48</sup>     | Scarabaeidae | Coleoptera | 940.00  | 3238.8 |
| <i>Leucocelis elegans</i> <sup>16</sup>     | Scarabaeidae | Coleoptera | 80.00   | 337.0  |

|                                              |               |            |         |       |
|----------------------------------------------|---------------|------------|---------|-------|
| <i>Simplocaria metallica</i> <sup>49</sup>   | Byrrhidae     | Coleoptera | 2.85    | 0.5   |
| <i>Agrypnus bocandei</i> <sup>16</sup>       | Elateridae    | Coleoptera | 166.20  | 71.6  |
| <i>Rhizopertha dominica</i> <sup>50</sup>    | Bostrichidae  | Coleoptera | 1.40    | 14.8  |
| <i>Melyrid</i> sp. <sup>20</sup>             | Melyridae     | Coleoptera | 1.16    | 20.9  |
| <i>Hippodamia convergens</i> <sup>51</sup>   | Coccinellidae | Coleoptera | 17.00   | 193.2 |
| <i>Hydromedion sparsutum</i> <sup>52</sup>   | Perimylopidae | Coleoptera | 23.50   | 83.5  |
| <i>Perimylops antarcticus</i> <sup>52</sup>  | Perimylopidae | Coleoptera | 14.50   | 48.6  |
| <i>Adesmia baccata</i> <sup>53</sup>         | Tenebrionidae | Coleoptera | 407.00  | 179.2 |
| <i>Anepsius brunneus</i> <sup>20</sup>       | Tenebrionidae | Coleoptera | 6.15    | 24.8  |
| <i>Centrioptera muricata</i> <sup>20</sup>   | Tenebrionidae | Coleoptera | 132.60  | 468.6 |
| <i>Erodium nanus</i> <sup>54</sup>           | Tenebrionidae | Coleoptera | 21.90   | 101.3 |
| <i>Euschides luctata</i> <sup>20</sup>       | Tenebrionidae | Coleoptera | 83.80   | 464.8 |
| <i>Peristepus</i> sp. <sup>53</sup>          | Tenebrionidae | Coleoptera | 55.00   | 54.5  |
| <i>Phrynocolus auriculatus</i> <sup>53</sup> | Tenebrionidae | Coleoptera | 193.00  | 169.1 |
| <i>Phrynocolus petrosus</i> <sup>53</sup>    | Tenebrionidae | Coleoptera | 1109.00 | 355.7 |
| <i>Phrynocolus</i> sp. <sup>53</sup>         | Tenebrionidae | Coleoptera | 204.00  | 191.4 |

|                                             |               |            |         |        |
|---------------------------------------------|---------------|------------|---------|--------|
| <i>Physosterna cribripes</i> <sup>55</sup>  | Tenebrionidae | Coleoptera | 1226.00 | 2443.7 |
| <i>Physadesmia globosa</i> <sup>56</sup>    | Tenebrionidae | Coleoptera | 516.00  | 599.6  |
| <i>Sphaeriontis dilatata</i> <sup>20</sup>  | Tenebrionidae | Coleoptera | 46.00   | 150.7  |
| <i>Blaps gigas</i> <sup>54</sup>            | Tenebrionidae | Coleoptera | 1776.00 | 4508.3 |
| <i>Nyctobates procerus</i> <sup>40</sup>    | Tenebrionidae | Coleoptera | 2198.00 | 1753.3 |
| <i>Pterohelaeus</i> sp. <sup>57</sup>       | Tenebrionidae | Coleoptera | 245.00  | 481.6  |
| <i>Tenebrio molitor</i> <sup>30</sup>       | Tenebrionidae | Coleoptera | 100.00  | 372.2  |
| <i>Zophobas</i> sp. <sup>40</sup>           | Tenebrionidae | Coleoptera | 535.00  | 1269.6 |
| <i>Tribolium castaneum</i> *                | Tenebrionidae | Coleoptera | 2.40    | 13.0   |
| <i>Tribolium confusum</i> <sup>58</sup>     | Tenebrionidae | Coleoptera | 2.01    | 16.3   |
| <i>Trogloclerus costatus</i> <sup>20</sup>  | Tenebrionidae | Coleoptera | 29.87   | 93.1   |
| <i>Vieta bulbifera</i> <sup>53</sup>        | Tenebrionidae | Coleoptera | 479.00  | 538.8  |
| <i>Vieta muscosa</i> <sup>53</sup>          | Tenebrionidae | Coleoptera | 140.00  | 135.4  |
| <i>Cryptoglossa verrucosa</i> <sup>59</sup> | Tenebrionidae | Coleoptera | 700.00  | 418.8  |
| <i>Edrotes ventricosus</i> <sup>20</sup>    | Tenebrionidae | Coleoptera | 24.35   | 91.9   |
| <i>Pimelia cenchronota</i> <sup>53</sup>    | Tenebrionidae | Coleoptera | 1474.00 | 620.9  |

|                                                           |               |            |         |        |
|-----------------------------------------------------------|---------------|------------|---------|--------|
| <i>Pimelia grandis</i> <sup>60</sup>                      | Tenebrionidae | Coleoptera | 2098.00 | 3734.1 |
| <i>Pimelia obsoleta</i> <sup>54</sup>                     | Tenebrionidae | Coleoptera | 861.00  | 3011.3 |
| <i>Rhytinota praelonga</i> <sup>53</sup>                  | Tenebrionidae | Coleoptera | 105.00  | 100.0  |
| <i>Triorophus laevis</i> <sup>20</sup>                    | Tenebrionidae | Coleoptera | 8.46    | 107.7  |
| <i>Helius waiti</i> <sup>57</sup>                         | Tenebrionidae | Coleoptera | 672.00  | 1675.1 |
| <i>Cardiosis fairmarei</i> <sup>56</sup>                  | Tenebrionidae | Coleoptera | 32.00   | 29.6   |
| <i>Zophosis orbicularis</i> <sup>56</sup>                 | Tenebrionidae | Coleoptera | 103.00  | 121.4  |
| <i>Psammodes striatus</i> <sup>56</sup>                   | Tenebrionidae | Coleoptera | 3010.00 | 4271.5 |
| <i>Epiphysa arenicola</i> <sup>56</sup>                   | Tenebrionidae | Coleoptera | 1237.00 | 469.4  |
| <i>Onymacris plana</i> <sup>56</sup>                      | Tenebrionidae | Coleoptera | 767.00  | 925.9  |
| <i>Onymacris laeviceps</i> <sup>56</sup>                  | Tenebrionidae | Coleoptera | 525.00  | 427.9  |
| <i>Onymacris rugatipennis rugatipennis</i> <sup>56</sup>  | Tenebrionidae | Coleoptera | 496.00  | 446.2  |
| <i>Onymacris rugatipennis albotesselata</i> <sup>56</sup> | Tenebrionidae | Coleoptera | 573.00  | 578.91 |
| <i>Onymacris unguicularis</i> <sup>61</sup>               | Tenebrionidae | Coleoptera | 737.00  | 176.0  |
| <i>Stenocara gracilipes</i> <sup>56</sup>                 | Tenebrionidae | Coleoptera | 268.00  | 476.3  |
| <i>Eusattus dubius</i> <sup>20</sup>                      | Tenebrionidae | Coleoptera | 27.22   | 282.6  |

|                                               |               |            |         |         |
|-----------------------------------------------|---------------|------------|---------|---------|
| <i>Eleodes armata</i> <sup>59</sup>           | Tenebrionidae | Coleoptera | 917.00  | 823.6   |
| <i>Eleodes grandicollis</i> <sup>20</sup>     | Tenebrionidae | Coleoptera | 521.93  | 2537.0  |
| <i>Eleodes</i> sp. <sup>20</sup>              | Tenebrionidae | Coleoptera | 88.85   | 356.2   |
| <i>Eleodes tenebrosa</i> <sup>20</sup>        | Tenebrionidae | Coleoptera | 51.53   | 247.4   |
| <i>Meloid</i> sp. <sup>20</sup>               | Meloidae      | Coleoptera | 17.34   | 406.7   |
| <i>Acanthoderes circumflexa</i> <sup>40</sup> | Cerambycidae  | Coleoptera | 139.00  | 241.8   |
| <i>Acrocinus longimanus</i> <sup>40</sup>     | Cerambycidae  | Coleoptera | 5383.00 | 16565.8 |
| <i>Dryoctenes scrupulosa</i> <sup>40</sup>    | Cerambycidae  | Coleoptera | 1823.00 | 2825.3  |
| <i>Oncideres putator</i> <sup>40</sup>        | Cerambycidae  | Coleoptera | 681.00  | 1095.9  |
| <i>Taeinotes scalaris</i> <sup>40</sup>       | Cerambycidae  | Coleoptera | 397.00  | 952.3   |
| <i>Acanthophorus confinis</i> <sup>16</sup>   | Cerambycidae  | Coleoptera | 3490.00 | 6180.9  |
| <i>Macrodontia dejeani</i> <sup>40</sup>      | Cerambycidae  | Coleoptera | 4860.00 | 7799.2  |
| <i>Stenodontes molaria</i> <sup>40</sup>      | Cerambycidae  | Coleoptera | 2944.00 | 6393.9  |
| <i>Stenodontes</i> sp. <sup>40</sup>          | Cerambycidae  | Coleoptera | 1043.00 | 2040.6  |
| <i>Trachysomus peregrinus</i> <sup>40</sup>   | Cerambycidae  | Coleoptera | 547.00  | 603.8   |
| <i>Brasilanus batus</i> <sup>40</sup>         | Cerambycidae  | Coleoptera | 1965.00 | 6232.9  |

|                                                |               |            |         |        |
|------------------------------------------------|---------------|------------|---------|--------|
| <i>Eburia</i> sp. <sup>40</sup>                | Cerambycidae  | Coleoptera | 582.00  | 1493.2 |
| <i>Nyssicus setosus</i> <sup>40</sup>          | Cerambycidae  | Coleoptera | 996.00  | 715.5  |
| <i>Phorocantha recurva</i> <sup>62</sup>       | Cerambycidae  | Coleoptera | 260.00  | 800.2  |
| <i>Phorocantha semipunctata</i> <sup>62</sup>  | Cerambycidae  | Coleoptera | 300.00  | 701.7  |
| <i>Xenambyx laticauda</i> <sup>40</sup>        | Cerambycidae  | Coleoptera | 1217.00 | 1571.9 |
| <i>Diplocapsis</i> sp. <sup>20</sup>           | Chrysomelidae | Coleoptera | 5.34    | 89.1   |
| <i>Griburius</i> sp. 1 <sup>20</sup>           | Chrysomelidae | Coleoptera | 3.31    | 60.1   |
| <i>Griburius</i> sp. 2 <sup>20</sup>           | Chrysomelidae | Coleoptera | 9.42    | 43.7   |
| <i>Leptinotarsa decemlineata</i> <sup>63</sup> | Chrysomelidae | Coleoptera | 150.00  | 693.9  |
| <i>Monoxia</i> sp. <sup>20</sup>               | Chrysomelidae | Coleoptera | 4.63    | 79.2   |
| <i>Smicronyx imbricata</i> <sup>20</sup>       | Curculionidae | Coleoptera | 0.32    | 3.6    |
| <i>Ectemnorhinus marioni</i> <sup>64</sup>     | Curculionidae | Coleoptera | 9.60    | 27.3   |
| <i>Ectemnorhinus similis</i> <sup>64</sup>     | Curculionidae | Coleoptera | 13.40   | 32.5   |
| <i>Ips acuminatus</i> <sup>65</sup>            | Scolytidae    | Coleoptera | 2.84    | 36.3   |
| <i>Calandra oryzae</i> <sup>50</sup>           | Curculionidae | Coleoptera | 1.70    | 17.7   |
| <i>Sitophilus granarius</i> <sup>66</sup>      | Curculionidae | Coleoptera | 3.68    | 139.6  |

|                                                |               |            |         |        |
|------------------------------------------------|---------------|------------|---------|--------|
| <i>Microcerus</i> sp. <sup>16</sup>            | Curculionidae | Coleoptera | 132.00  | 189.6  |
| <i>Ophryastes varius</i> <sup>20</sup>         | Curculionidae | Coleoptera | 27.26   | 119.3  |
| <i>Miloderes</i> sp. <sup>20</sup>             | Curculionidae | Coleoptera | 3.40    | 65.7   |
| <i>Hylobius abietis</i> <sup>67</sup>          | Curculionidae | Coleoptera | 183.00  | 418.1  |
| <i>Hipporhinus tenuespinosus</i> <sup>16</sup> | Curculionidae | Coleoptera | 1080.00 | 548.0  |
| <i>Eucyllus vagans</i> <sup>20</sup>           | Curculionidae | Coleoptera | 7.43    | 31.8   |
| <i>Eucyllus unicolor</i> <sup>20</sup>         | Curculionidae | Coleoptera | 2.59    | 13.2   |
| <i>Bothrometopus randi</i> <sup>64</sup>       | Curculionidae | Coleoptera | 24.60   | 51.1   |
| <i>Bothrometopus parvulus</i> <sup>64</sup>    | Curculionidae | Coleoptera | 3.60    | 19.4   |
| <i>Bothrometopus elongatus</i> <sup>64</sup>   | Curculionidae | Coleoptera | 1.70    | 15.2   |
| <i>Palirhoeus eatoni</i> <sup>68</sup>         | Curculionidae | Coleoptera | 6.70    | 24.3   |
| <i>Lixus bisulcatus</i> <sup>16</sup>          | Curculionidae | Coleoptera | 405.00  | 1357.0 |
| <i>Rhynchaenus flagellum</i> <sup>49</sup>     | Curculionidae | Coleoptera | 0.51    | 0.2    |
| <i>Rhytonomus isobellina</i> <sup>54</sup>     | Curculionidae | Coleoptera | 8.10    | 93.7   |
| <i>Hypera postica</i> <sup>69</sup>            | Curculionidae | Coleoptera | 5.80    | 159.5  |
| <i>Canonopsis sericeus</i> <sup>64</sup>       | Curculionidae | Coleoptera | 58.90   | 175.1  |



|                                               |               |            |         |        |
|-----------------------------------------------|---------------|------------|---------|--------|
| Unknown genus <sup>20</sup>                   | Curculionidae | Coleoptera | 0.3     | 1.63   |
| Unknown genus 1 <sup>16</sup>                 | Curculionidae | Coleoptera | 193     | 120.1  |
| Unknown genus 3 <sup>16</sup>                 | Curculionidae | Coleoptera | 10.5    | 7.0    |
| <i>Cerotalis</i> sp. <sup>57</sup>            | Carabidae     | Coleoptera | 562.00  | 474.6  |
| <i>Chilanthia cavernosa</i> <sup>53</sup>     | Carabidae     | Coleoptera | 1026.00 | 1571.5 |
| <i>Thermophilum babaulti</i> <sup>53</sup>    | Carabidae     | Coleoptera | 1295.00 | 3223.9 |
| <i>Thermophilum hexastictum</i> <sup>53</sup> | Carabidae     | Coleoptera | 2025.00 | 2423.2 |
| <i>Triaenogeius scupturatus</i> <sup>53</sup> | Carabidae     | Coleoptera | 170.00  | 341.8  |
| <i>Anthia fabricii</i> <sup>70</sup>          | Carabidae     | Coleoptera | 2250.00 | 1875.1 |
| <i>Cypholoba bihamata</i> <sup>53</sup>       | Carabidae     | Coleoptera | 245.00  | 961.6  |
| <i>Cypholoba chanleri</i> <sup>53</sup>       | Carabidae     | Coleoptera | 326.00  | 780.2  |
| <i>Cypholoba</i> sp. <sup>53</sup>            | Carabidae     | Coleoptera | 192.00  | 937.4  |
| <i>Cypholoba tenuicollis</i> <sup>53</sup>    | Carabidae     | Coleoptera | 59.00   | 245.7  |
| <i>Cypholoba tetrastigma</i> <sup>53</sup>    | Carabidae     | Coleoptera | 132.00  | 802.4  |
| <i>Cypholoba trilunata</i> <sup>53</sup>      | Carabidae     | Coleoptera | 213.00  | 530.2  |
| <i>Amara quenseli</i> <sup>49</sup>           | Carabidae     | Coleoptera | 15.00   | 1.4    |

|                                               |                |            |         |        |
|-----------------------------------------------|----------------|------------|---------|--------|
| <i>Evarthrus sodalis</i> <sup>11</sup>        | Carabidae      | Coleoptera | 164.10  | 186.7  |
| <i>Carinum</i> sp. <sup>57</sup>              | Carabidae      | Coleoptera | 4240.00 | 2428.9 |
| <i>Crepidogaster bioculata</i> <sup>53</sup>  | Carabidae      | Coleoptera | 171.00  | 286.5  |
| <i>Sphaeroderus stenostomus</i> <sup>11</sup> | Carabidae      | Coleoptera | 169.60  | 262.1  |
| <i>Calosoma affine</i> <sup>7</sup>           | Carabidae      | Coleoptera | 620.00  | 787.2  |
| <i>Calosoma</i> sp. <sup>20</sup>             | Carabidae      | Coleoptera | 151.23  | 838.6  |
| <i>Campalita chlorostictum</i> <sup>53</sup>  | Carabidae      | Coleoptera | 521.00  | 798.0  |
| Unknown genus <sup>16</sup>                   | Carabidae      | Coleoptera | 79.0    | 533.2  |
| <i>Cicindela longilabris</i> <sup>71</sup>    | Cicindelidae   | Coleoptera | 124.30  | 269.6  |
| <i>Cicindela repanda</i> <sup>72</sup>        | Cicindelidae   | Coleoptera | 63.40   | 145.5  |
| <i>Paractora dreuxi</i> <sup>73</sup>         | Helcomyzidae   | Diptera    | 19.17   | 243.9  |
| <i>Paractora trichosterna</i> <sup>73</sup>   | Helcomyzidae   | Diptera    | 13.26   | 261.3  |
| <i>Antrops truncipennis</i> <sup>73</sup>     | Sphaeroceridae | Diptera    | 2.21    | 51.6   |
| <i>Drosophila americana</i> <sup>74</sup>     | Drosophilidae  | Diptera    | 1.10    | 15.3   |
| <i>Drosophila melanogaster</i> <sup>75</sup>  | Drosophilidae  | Diptera    | 0.95    | 32.0   |
| <i>Drosophila mimica</i> <sup>75</sup>        | Drosophilidae  | Diptera    | 2.44    | 49.5   |

|                                               |                  |         |         |        |
|-----------------------------------------------|------------------|---------|---------|--------|
| <i>Drosophila nikananu</i> <sup>75</sup>      | Drosophilidae    | Diptera | 0.49    | 19.4   |
| <i>Drosophila repleta</i> <sup>76</sup>       | Drosophilidae    | Diptera | 3.43    | 32.3   |
| <i>Drosophila virilis</i> <sup>75</sup>       | Drosophilidae    | Diptera | 1.67    | 45.7   |
| <i>Glossina morsitans</i> <sup>77</sup>       | Glossinidae      | Diptera | 22.34   | 123.5  |
| <i>Glossina pallidipes</i> <sup>78</sup>      | Glossinidae      | Diptera | 38.45   | 374.3  |
| <i>Musca autumnalis</i> <sup>79</sup>         | Muscidae         | Diptera | 22.00   | 360.8  |
| <i>Musca domestica</i> <sup>80</sup>          | Muscidae         | Diptera | 18.00   | 587.6  |
| <i>Phormia regina</i> <sup>81</sup>           | Calliphoridae    | Diptera | 50.00   | 541.5  |
| <i>Protophormia terraenovae</i> <sup>82</sup> | Calliphoridae    | Diptera | 25.00   | 225.2  |
| <i>Pilica formidolosa</i> <sup>83</sup>       | Asilidae         | Diptera | 200.00  | 789.8  |
| <i>Promachus</i> sp. 2 <sup>83</sup>          | Asilidae         | Diptera | 180.00  | 1447.4 |
| <i>Tabanus affinis</i> <sup>84</sup>          | Tabanidae        | Diptera | 161.70  | 114.5  |
| <i>Pantophthalmus tabaninus</i> <sup>85</sup> | Pantophthalmidae | Diptera | 1746.00 | 3036.9 |
| <i>Simulium venustum</i> <sup>84</sup>        | Simuliidae       | Diptera | 2.53    | 86.0   |
| <i>Chironomus riparius</i> <sup>86</sup>      | Chironomidae     | Diptera | 1.00    | 16.1   |
| <i>Aedes campestris</i> <sup>84</sup>         | Culicidae        | Diptera | 6.72    | 295.0  |

|                                            |              |              |         |        |
|--------------------------------------------|--------------|--------------|---------|--------|
| <i>Culex tarsalis</i> <sup>87</sup>        | Culicidae    | Diptera      | 2.23    | 23.6   |
| <i>Xenopsilla ramesis</i> <sup>88</sup>    | Pulicidae    | Siphonaptera | 0.16    | 0.6    |
| <i>Vanessa io</i> <sup>30</sup>            | Nymphalidae  | Lepidoptera  | 230.00  | 922.2  |
| <i>Thais cassandra</i> <sup>30</sup>       | Papilionidae | Lepidoptera  | 130.00  | 3488.4 |
| <i>Apetaloides firmiana</i> <sup>89</sup>  | Notodontidae | Lepidoptera  | 169.00  | 828.3  |
| <i>Hapigia simplex</i> <sup>89</sup>       | Notodontidae | Lepidoptera  | 478.00  | 1584.0 |
| <i>Lirimiris</i> sp. <sup>89</sup>         | Notodontidae | Lepidoptera  | 564.00  | 1765.4 |
| <i>Mamestra configurata</i> <sup>90</sup>  | Noctuidae    | Lepidoptera  | 139.05  | 465.3  |
| <i>Bombyx mori</i> <sup>30</sup>           | Bombicidae   | Lepidoptera  | 490.00  | 3492.6 |
| <i>Deilephila elpenor</i> <sup>30</sup>    | Sphingidae   | Lepidoptera  | 600.00  | 893.2  |
| <i>Deilephila euphorbiae</i> <sup>30</sup> | Sphingidae   | Lepidoptera  | 700.00  | 2347.9 |
| <i>Xylophanes chiron</i> <sup>89</sup>     | Sphingidae   | Lepidoptera  | 708.00  | 1348.2 |
| <i>Xylophanes libya</i> <sup>89</sup>      | Sphingidae   | Lepidoptera  | 559.00  | 2551.4 |
| <i>Xylophanes pluto</i> <sup>89</sup>      | Sphingidae   | Lepidoptera  | 829.00  | 2258.2 |
| <i>Enyo ocypete</i> <sup>89</sup>          | Sphingidae   | Lepidoptera  | 453.33  | 1148.7 |
| <i>Erinnyis ello</i> <sup>89</sup>         | Sphingidae   | Lepidoptera  | 1210.00 | 4135.4 |

|                                               |             |             |         |        |
|-----------------------------------------------|-------------|-------------|---------|--------|
| <i>Erinnyis oenotrus</i> <sup>89</sup>        | Sphingidae  | Lepidoptera | 964.00  | 3615.5 |
| <i>Madoryx oecus</i> <sup>89</sup>            | Sphingidae  | Lepidoptera | 1699.00 | 5368.8 |
| <i>Oryba achemenides</i> <sup>89</sup>        | Sphingidae  | Lepidoptera | 2808.50 | 6058.0 |
| <i>Pachygonia drucei</i> <sup>89</sup>        | Sphingidae  | Lepidoptera | 702.00  | 1481.3 |
| <i>Pachylia ficus</i> <sup>89</sup>           | Sphingidae  | Lepidoptera | 3225.00 | 5114.9 |
| <i>Perigonia lusca</i> <sup>89</sup>          | Sphingidae  | Lepidoptera | 558.33  | 2265.2 |
| <i>Metopsilus porcellus</i> <sup>30</sup>     | Sphingidae  | Lepidoptera | 285.00  | 1361.8 |
| <i>Mimas tiliae</i> <sup>30</sup>             | Sphingidae  | Lepidoptera | 320.00  | 1666.8 |
| <i>Protambulyx strigilis</i> <sup>89</sup>    | Sphingidae  | Lepidoptera | 1095.33 | 2251.1 |
| <i>Manduca corallina</i> <sup>89</sup>        | Sphingidae  | Lepidoptera | 1618.25 | 3239.1 |
| <i>Manduca lefeburei</i> <sup>89</sup>        | Sphingidae  | Lepidoptera | 571.00  | 925.0  |
| <i>Manduca rustica</i> <sup>89</sup>          | Sphingidae  | Lepidoptera | 2810.00 | 6704.9 |
| <i>Sphinx ligustri</i> <sup>30</sup>          | Sphingidae  | Lepidoptera | 1400.00 | 7513.4 |
| <i>Adeloneivaia boisduvalii</i> <sup>89</sup> | Saturniidae | Lepidoptera | 1034.00 | 1795.6 |
| <i>Adeloneivaia subungulata</i> <sup>89</sup> | Saturniidae | Lepidoptera | 487.00  | 1850.1 |
| <i>Eacles imperialis</i> <sup>89</sup>        | Saturniidae | Lepidoptera | 1105.00 | 3282.9 |

|                                                 |               |             |         |        |
|-------------------------------------------------|---------------|-------------|---------|--------|
| <i>Sphingicampa quadrilineata</i> <sup>89</sup> | Saturniidae   | Lepidoptera | 818.00  | 2134.2 |
| <i>Syssphinx molina</i> <sup>89</sup>           | Saturniidae   | Lepidoptera | 1757.00 | 4431.7 |
| <i>Antheraea pernyi</i> <sup>30</sup>           | Saturniidae   | Lepidoptera | 1210.00 | 6134.5 |
| <i>Automerina auletes</i> <sup>89</sup>         | Saturniidae   | Lepidoptera | 720.00  | 1813.8 |
| <i>Automeris fieldi</i> <sup>89</sup>           | Saturniidae   | Lepidoptera | 394.00  | 1088.3 |
| <i>Automeris hamata</i> <sup>89</sup>           | Saturniidae   | Lepidoptera | 564.00  | 1995.2 |
| <i>Automeris jacunda</i> <sup>89</sup>          | Saturniidae   | Lepidoptera | 653.25  | 1549.3 |
| <i>Automeris zugana</i> <sup>89</sup>           | Saturniidae   | Lepidoptera | 539.75  | 1103.4 |
| <i>Dirphea agis</i> <sup>89</sup>               | Saturniidae   | Lepidoptera | 197.00  | 483.7  |
| <i>Hylesia praeda</i> <sup>89</sup>             | Saturniidae   | Lepidoptera | 146.00  | 816.2  |
| <i>Hylesia</i> sp. <sup>89</sup>                | Saturniidae   | Lepidoptera | 239.14  | 682.3  |
| <i>Hyperchirica nausica</i> <sup>89</sup>       | Saturniidae   | Lepidoptera | 199.50  | 786.0  |
| <i>Artace</i> sp. <sup>89</sup>                 | Lasiocampidae | Lepidoptera | 132.00  | 332.5  |
| <i>Euglyphis</i> sp. <sup>89</sup>              | Lasiocampidae | Lepidoptera | 87.00   | 411.1  |
| <i>Odonestis pruni</i> <sup>30</sup>            | Lasiocampidae | Lepidoptera | 250.00  | 1130.0 |
| <i>Galleria mellonella</i> <sup>91</sup>        | Pyralidae     | Lepidoptera | 53.60   | 635.0  |

|                                                 |              |             |         |        |
|-------------------------------------------------|--------------|-------------|---------|--------|
| <i>Ostrinia nubilalis</i> <sup>92</sup>         | Pyrilidae    | Lepidoptera | 48.40   | 484.2  |
| <i>Neocossus</i> sp. <sup>89</sup>              | Cossidae     | Lepidoptera | 1771.63 | 4008.5 |
| <i>Megalpyge</i> sp. <sup>89</sup>              | Megalpygidae | Lepidoptera | 627.00  | 1559.9 |
| <i>Apis mellifera ligustica</i> <sup>93</sup>   | Apidae       | Hymenoptera | 94.40   | 606.9  |
| <i>Bombus terrestris</i> <sup>94</sup>          | Apidae       | Hymenoptera | 740.00  | 821.8  |
| <i>Xylocopa capitata</i> <sup>95</sup>          | Xylocopidae  | Hymenoptera | 1300.00 | 6835.4 |
| <i>Dasylabris</i> sp. <sup>16</sup>             | Mutillidae   | Hymenoptera | 86.50   | 37.3   |
| <i>Dasymutilla gloriosa</i> <sup>96</sup>       | Mutillidae   | Hymenoptera | 76.45   | 1869.5 |
| Unknown genus <sup>20</sup>                     | Pompilidae   | Hymenoptera | 14.14   | 202.0  |
| <i>Leptothorax acerovororum</i> <sup>97</sup>   | Formicidae   | Hymenoptera | 0.37    | 5.1    |
| <i>Leptothorax unifasciatus</i> <sup>98</sup>   | Formicidae   | Hymenoptera | 0.49    | 2.4    |
| <i>Atta laevigata</i> <sup>99</sup>             | Formicidae   | Hymenoptera | 15.00   | 35.2   |
| <i>Atta sexdens</i> <sup>100</sup>              | Formicidae   | Hymenoptera | 15.00   | 43.1   |
| <i>Myrmica alaskensis</i> <sup>97</sup>         | Formicidae   | Hymenoptera | 0.91    | 10.7   |
| <i>Myrmica rubra</i> <sup>101</sup>             | Formicidae   | Hymenoptera | 2.76    | 6.8    |
| <i>Pogonomyrmex californicus</i> <sup>102</sup> | Formicidae   | Hymenoptera | 5.92    | 9.3    |

|                                                 |            |             |       |       |
|-------------------------------------------------|------------|-------------|-------|-------|
| <i>Pogonomyrmex maricopa</i> <sup>103</sup>     | Formicidae | Hymenoptera | 11.07 | 40.6  |
| <i>Pogonomyrmex occidentalis</i> <sup>102</sup> | Formicidae | Hymenoptera | 7.96  | 12.8  |
| <i>Pogonomyrmex rugosus</i> <sup>102</sup>      | Formicidae | Hymenoptera | 14.30 | 27.6  |
| <i>Pogonomyrmex</i> sp. <sup>20</sup>           | Formicidae | Hymenoptera | 3.74  | 12.6  |
| <i>Aphaenogaster cockerelli</i> <sup>97</sup>   | Formicidae | Hymenoptera | 4.72  | 82.5  |
| <i>Messor capensis</i> *                        | Formicidae | Hymenoptera | 13.70 | 38.3  |
| <i>Messor capitatus</i> <sup>104</sup>          | Formicidae | Hymenoptera | 3.14  | 16.2  |
| <i>Messor julianus</i> <sup>105</sup>           | Formicidae | Hymenoptera | 5.09  | 7.1   |
| <i>Messor pergandei</i> <sup>105</sup>          | Formicidae | Hymenoptera | 7.19  | 14.0  |
| <i>Chelaner rothsteini</i> <sup>106</sup>       | Formicidae | Hymenoptera | 0.25  | 1.1   |
| <i>Solenopsis invicta</i> <sup>107</sup>        | Formicidae | Hymenoptera | 2.96  | 5.6   |
| <i>Tetramorium caespitum</i> <sup>101</sup>     | Formicidae | Hymenoptera | 0.69  | 2.4   |
| <i>Camponotus detritus</i> <sup>108</sup>       | Formicidae | Hymenoptera | 42.90 | 78.0  |
| <i>Camponotus fulvopilosus</i> <sup>109</sup>   | Formicidae | Hymenoptera | 43.00 | 63.4  |
| <i>Camponotus laevigatus</i> <sup>97</sup>      | Formicidae | Hymenoptera | 19.15 | 117.8 |
| <i>Camponotus maculatus</i> *                   | Formicidae | Hymenoptera | 42.49 | 51.1  |



|                                                             |            |             |        |       |
|-------------------------------------------------------------|------------|-------------|--------|-------|
| <i>Camponotus sericeiventris</i> <sup>110</sup>             | Formicidae | Hymenoptera | 40.20  | 73.2  |
| <i>Camponotus</i> sp. <sup>97</sup>                         | Formicidae | Hymenoptera | 15.41  | 78.2  |
| <i>Camponotus vafer</i> <sup>97</sup>                       | Formicidae | Hymenoptera | 4.51   | 58.8  |
| <i>Camponotus vicinus</i> <sup>111</sup>                    | Formicidae | Hymenoptera | 107.00 | 143.5 |
| <i>Cataglyphis bicolor</i> <sup>112</sup>                   | Formicidae | Hymenoptera | 34.00  | 37.8  |
| <i>Formica exsecta</i> <sup>101</sup>                       | Formicidae | Hymenoptera | 4.05   | 21.9  |
| <i>Formica fusca</i> var. <i>subaenescens</i> <sup>97</sup> | Formicidae | Hymenoptera | 1.35   | 31.3  |
| <i>Formica fusca</i> <sup>101</sup>                         | Formicidae | Hymenoptera | 4.41   | 9.65  |
| <i>Formica occulta</i> <sup>97</sup>                        | Formicidae | Hymenoptera | 1.30   | 19.5  |
| <i>Formica pratensis</i> <sup>101</sup>                     | Formicidae | Hymenoptera | 7.17   | 31.4  |
| <i>Lasius alienus</i> <sup>101</sup>                        | Formicidae | Hymenoptera | 1.38   | 6.0   |
| <i>Lasius flavus</i> <sup>101</sup>                         | Formicidae | Hymenoptera | 2.58   | 11.5  |
| <i>Lasius niger</i> <sup>101</sup>                          | Formicidae | Hymenoptera | 1.74   | 6.1   |
| <i>Lasius sitiens</i> <sup>97</sup>                         | Formicidae | Hymenoptera | 0.29   | 3.2   |
| <i>Forelius foetidus</i> <sup>97</sup>                      | Formicidae | Hymenoptera | 0.10   | 1.3   |
| <i>Anoplolepis steinergroeveri</i> *                        | Formicidae | Hymenoptera | 4.94   | 14.1  |

|                                            |              |             |        |       |
|--------------------------------------------|--------------|-------------|--------|-------|
| <i>Leptogenys attenuata</i> <sup>113</sup> | Formicidae   | Hymenoptera | 4.00   | 12.3  |
| <i>Leptogenys nitida</i> <sup>113</sup>    | Formicidae   | Hymenoptera | 1.72   | 5.2   |
| <i>Leptogenys schwabi</i> <sup>113</sup>   | Formicidae   | Hymenoptera | 8.96   | 21.0  |
| <i>Paraponera clavata</i> <sup>114</sup>   | Formicidae   | Hymenoptera | 190.00 | 430.8 |
| <i>Eciton hamatum</i> <sup>115</sup>       | Formicidae   | Hymenoptera | 6.00   | 25.3  |
| <i>Ponaria sp.</i> <sup>39</sup>           | Formicidae   | Hymenoptera | 0.19   | 1.35  |
| Unknown genus <sup>20</sup>                | Braconidae   | Hymenoptera | 1.70   | 27.8  |
| Unknown genus <sup>20</sup>                | Chaclidoidea | Hymenoptera | 0.16   | 3.5   |
| Unknown genus <sup>16</sup>                | Formicidae   | Hymenoptera | 46.4   | 120.2 |

\* Chown lab, unpublished data.

‡ Wing status: 1 = winged; 0 = no wings

Ten data points added to the data set of Chown et al. (2007) are shown in green color.

## References

1. May, M. L. Energy metabolism of dragonflies (Odonata: Anisoptera) at rest and during endothermic warm-up. *Journal of Experimental Biology* **83**, 79-94 (1979).
2. Shelton, T. G. & Appel, A. G. Carbon dioxide release in *Coptotermes formosanus* Shiraki and *Reticulitermes flavipes* (Kollar): effects of caste, mass, and movement. *Journal of Insect Physiology* **47**, 213-224 (2001).
3. Jeeva, D., Bignell, D. E., Eggleton, P. & Maryati, M. Respiratory gas exchanges of termites from the Sabah (Borneo) assemblage. *Physiological Entomology* **24**, 11-17 (1999).
4. McComie, L. D. & Dhanarjan, G. Respiratory rate and energy utilization by *Macrotermes carbonarius* (Hagen) (Isoptera, Termitidae, Macrotermitinae) in Penang, Malaysia. *Insect Science and its Applications* **11**, 197-204 (1990).
5. Gunn, D. L. Oxygen consumption of the cockroach in relation to moulting. *Nature* **125**, 434-435 (1935).
6. Herreid, C. F. & Full, R. J. Cockroaches on a treadmill: aerobic running. *Journal of Insect Physiology* **30**, 395-403 (1984).
7. Full, R. J., Zuccarello, D. A. & Tullis, A. Effect of variation in form on the cost of terrestrial locomotion. *Journal of Experimental Biology* **150**, 233-246 (1990).
8. Slater, W. K. The aerobic and anaerobic metabolism of the common cockroach (*Periplaneta orientalis*). *Biochemical Journal* **21**, 198-203 (1927).
9. Harvey, G. T. & Brown, A. W. A. The effect of insecticide on the rate of oxygen consumption in *Blattella*. *Canadian Journal of Zoology* **29**, 42-53 (1951).
10. Herreid, C. F., Full, R. J. & Prawel, D. A. Energetics of cockroach locomotion. *Journal of Experimental Biology* **94**, 189-202 (1981).
11. Reichle, D. E. Relation of body size to food intake, oxygen consumption, and trace element metabolism in forest floor arthropods. *Ecology* **49**, 538-542 (1968).
12. Bartholomew, G. A. & Lighton, J. R. B. Ventilation and oxygen consumption during rest and locomotion in a tropical cockroach, *Blaberus giganteus*. *Journal of Experimental Biology* **118**, 449-454 (1985).
13. Coelho, J. R. & Moore, A. J. Allometry of resting metabolic rate in cockroaches. *Comparative Biochemistry and Physiology A* **94**, 587-590 (1989).
14. Marais, E. & Chown, S. L. Repeatability of standard metabolic rate and gas exchange characteristics in a highly variable cockroach, *Perisphaeria* sp. *Journal of Experimental Biology* **206**, 4565-4574 (2003).
15. Bailey, C. G., Withers, P. C., Endersby, M. & Gaull, K. The energetic costs of calling in the bushcricket *Requena verticalis* (Orthoptera: Tettigoniidae: Listroscolidinae). *Journal of Experimental Biology* **178**, 21-37 (1993).
16. Zachariassen, K. E., Andersen, J., Kamau, J. M. Z. & Maloiy, G. M. O. Water loss in insects from arid and humid habitats in East Africa. *Acta Entomologica Bohemoslovaca* **85**, 81-93 (1988).
17. Nespolo, R. F., Lardies, M. A. & Bozinovic, F. Intra-population variation in the standard metabolic rate of insects: repeatability, thermal dependence and sensitivity (Q<sub>10</sub>) of oxygen consumption in a cricket. *Journal of Experimental Biology* **206**, 4309-4315 (2003).
18. Van Hook, R. I. Energy and nutrient dynamics of spider and Orthopteran populations in a grassland ecosystems. *Ecological Monographs* **41**, 1-26 (1971).
19. Hack, M. A. The effects of mass and age on standard metabolic rate in house crickets. *Physiological Entomology* **22**, 325-331 (1997).
20. Mispagel, M. E. Relation of oxygen consumption to size and temperature in desert arthropods. *Ecological Entomology* **6**, 423-431 (1981).
21. Kavanagh, M. W. The efficiency of sound production on two cricket species, *Gryllotalpa australis* and *Teleogryllus commodus* (Orthoptera: Grylloidea). *Journal of Experimental Biology* **130**, 107-119 (1987).
22. Stevens, E. D. & Josephson, R. K. Metabolic rate and body temperature in singing katydids. *Physiological Zoology* **50**, 31-42 (1977).
23. Bailey, C. G. & Riegert, P. W. Energy dynamics of *Encoptolophus sordidus costalis* (Scudder) (Orthoptera: Acrididae) in a grassland ecosystem. *Canadian Journal of Zoology* **51**, 91-100 (1973).

24. Loveridge, J. P. & Bursell, E. Studies on the water relations of adult locusts (Orthoptera, Acrididae) I. Respiration and the production of metabolic water. *Bulletin of Entomological Research* **65**, 13-20 (1975).
25. Harrison, J. F., Philips, J. E. & Gleeson, T. T. Activity physiology of the two-striped grasshopper, *Melanoplus bivittatus*: gas exchange, hemolymph acid-base status, lactate production, and the effect of temperature. *Physiological Zoology* **64**, 451-472 (1991).
26. Quinlan, M. C. & Hadley, N. F. Gas exchange, ventilatory patterns, and water loss in two lubber grasshoppers: quantifying cuticular and respiratory transpiration. *Physiological Zoology* **66**, 628-642 (1993).
27. Massion, D. D. An altitudinal comparison of water and metabolic relations in two acridid grasshoppers (Orthoptera). *Comparative Biochemistry and Physiology A* **74**, 101-105 (1983).
28. Duke, K. M. & Crossley, D. A. Population energetics and ecology of the rock grasshopper, *Trimerotropis saxatilis*. *Ecology* **56**, 1106-1117 (1975).
29. Ashby, P. D. Conservation of mass-specific metabolic rate among high- and low-elevation populations of the acridid grasshopper *Xanthippus corallipes*. *Physiological Zoology* **70**, 701-711 (1997).
30. Keister, M. & Buck, J. in *Physiology of Insecta Volume 3* (ed. Rockstein, M.) 617-658 (Academic Press, New York, 1964).
31. Hinton, J. M. Energy flow in a natural population of *Neophilaenus lineatus* (Homoptera). *Oikos* **22**, 155-171 (1971).
32. Wiegert, R. G. Population energetics of meadow spittlebugs (*Philaenus spumarius* L.) as affected by migration and habitat. *Ecological Monographs* **34**, 217-241 (1964).
33. Mac Nally, R. C. & Doolan, J. M. Comparative reproductive energetics of the sexes in the cicada *Cystosoma saundersii*. *Oikos* **39**, 179-186 (1982).
34. Hadley, N. F., Quinlan, M. C. & Kennedy, M. L. Evaporative cooling in the desert cicada: thermal efficiency and water/metabolic costs. *Journal of Experimental Biology* **159**, 269-283 (1991).
35. Bartholomew, G. A. & Barnhart, M. C. Tracheal gases, respiratory gas exchange, body temperature and flight in some tropical cicadas. *Journal of Experimental Biology* **111**, 131-144 (1984).
36. Bradley, T. J., Brethorst, L., Robinson, S. & Hetz, S. Changes in the rate of CO<sub>2</sub> release following feeding in the insect *Rhodnius prolixus*. *Physiological and Biochemical Zoology* **76**, 302-309 (2003).
37. Brown, A. V. & Fitzpatrick, L. C. Life history and population energetics of the dobson fly, *Corydalus cornutus*. *Ecology* **59**, 1091-1108 (1978).
38. Holter, P. & Spangenberg, A. Oxygen uptake in coprophilous beetles (*Aphodius*, *Geotrupes*, *Sphaeridium*) at low oxygen and high carbon dioxide concentrations. *Physiological Entomology* **22**, 339-343 (1997).
39. Engelmann, M. D. The role of soil arthropods in the energetics of an old field community. *Ecological Monographs* **31**, 221-238 (1961).
40. Bartholomew, G. A. & Casey, T. M. Body temperature and oxygen consumption during rest and activity in relation to body size in some tropical beetles. *Journal of Thermal Biology* **2**, 173-176 (1977).
41. Bosch, M., Chown, S. L. & Scholtz, C. H. Discontinuous gas exchange and water loss in the keratin beetle *Omorgus radula*: further evidence against the water conservation hypothesis? *Physiological Entomology* **25**, 309-314 (2000).
42. Chown, S. L. & Holter, P. Discontinuous gas exchange cycles in *Aphodius fossor* (Scarabaeidae): a test of hypotheses concerning origins and mechanisms. *Journal of Experimental Biology* **203**, 397-403 (2000).
43. Holter, P. Resource utilization and local coexistence in a guild of scarabaeid dung beetles (*Aphodius* spp.). *Oikos* **39**, 213-227 (1982).
44. Duncan, F. D. & Byrne, M. J. Discontinuous gas exchange in dung beetles: patterns and ecological implications. *Oecologia* **122**, 452-458 (2000).
45. Chown, S. L., Scholtz, C. H., Klok, C. J., Joubert, F. J. & Coles, K. Ecophysiology, range contraction and survival of a geographically restricted African dung beetle (Coleoptera: Scarabaeidae). *Functional Ecology* **9**, 30-39 (1995).

46. Chown, S. L. & Davis, A. L. V. Discontinuous gas exchange and the significance of respiratory water loss in scarabaeine beetles. *Journal of Experimental Biology* **206**, 3547-3556 (2003).
47. Davis, A. L. V., Chown, S. L., McGeoch, M. A. & Scholtz, C. H. A comparative analysis of metabolic rate in six *Scarabaeus* species (Coleoptera : Scarabaeidae) from southern Africa: further caveats when inferring adaptation. *Journal of Insect Physiology* **46**, 553-562 (2000).
48. Morgan, K. R. Temperature regulation, energy metabolism and mate-searching in rain beetles (*Pleocoma* spp.), winter-active, endothermic scarabs (Coleoptera). *Journal of Experimental Biology* **128**, 107-122 (1987).
49. Strømme, J. A., Ngari, T. W. & Zachariassen, K. E. Physiological adaptations in Coleoptera on Spitzbergen. *Polar Research* **4**, 199-204 (1986).
50. Birch, L. C. The oxygen consumption of the small strain of *Calandra oryzae* L. and *Rhizopertha dominica* Fab. as affected by temperature and humidity. *Ecology* **28**, 17-25 (1947).
51. Acar, E. B., Smith, B. N., Hansen, L. D. & Booth, G. M. Use of calorimetry to determine effects of temperature on metabolic efficiency of an insect. *Environmental Entomology* **30**, 811-816 (2001).
52. Sømme, L., Ring, R. A., Block, W. & Worland, M. R. Respiratory metabolism of *Hydromedion sparsutum* and *Perimylops antarcticus* (Col., Perimylopidae) from South Georgia. *Polar Biology* **10**, 135-139 (1989).
53. Zachariassen, K. E., Anderson, J., Maloiy, G. M. O. & Kamau, J. M. Z. Transpiratory water loss and metabolism of beetles from arid areas in East Africa. *Comparative Biochemistry and Physiology A* **86**, 403-408 (1987).
54. Heatwole, H., Muir, R. & Davison, E. Oxygen consumption of some terrestrial invertebrates from the Pre-Saharan steppe of Tunisia. *Journal of Arid Environments* **11**, 219-226 (1986).
55. Bartholomew, G. A., Lighton, J. R. B. & Louw, G. N. Energetics of locomotion and patterns of respiration in tenebrionid beetles from the Namib Desert. *Journal of Comparative Physiology B* **155**, 155-162 (1985).
56. Lighton, J. R. B. Ventilation in Namib desert tenebrionid beetles: mass scaling and evidence of a novel quantized flutter-phase. *Journal of Experimental Biology* **159**, 249-268 (1991).
57. Duncan, F. D. & Dickman, C. R. Respiratory patterns and metabolism in tenebrionid and carabid beetles from the Simpson Desert, Australia. *Oecologia* **129**, 509-517 (2001).
58. Edwards, D. K. Effects of acclimatization and sex on respiration and thermal resistance in *Tribolium* (Coleoptera: Tenebrionidae). *Canadian Journal of Zoology* **36**, 363-382 (1958).
59. Cooper, P. D. Field metabolic rates and cost of activity in two tenebrionid beetles from the Mojave Desert of North America. *Journal of Arid Environments* **24**, 165-175 (1993).
60. Duncan, F. D., Krasnov, B. & McMaster, M. Novel case of a tenebrionid beetle using discontinuous gas exchange cycle when dehydrated. *Physiological Entomology* **27**, 79-83 (2002).
61. Louw, G. N., Nicolson, S. W. & Seely, M. K. Respiration beneath desert sand: carbon dioxide diffusion and respiratory patterns in a tenebrionid beetle. *Journal of Experimental Biology* **120**, 443-447 (1986).
62. Chappell, M. A. & Rogowitz, G. L. Mass, temperature and metabolic effects on discontinuous gas exchange cycles in *Eucalyptus*-boring beetles (Coleoptera: Cerambycidae). *Journal of Experimental Biology* **203**, 3809-3820 (2000).
63. Gromadzka, J. Respiratory metabolism of the Colorado beetle (*Leptinotarsa decemlineata* Say). *Ekologia Polska A* **16**, 1-9 (1968).
64. Klok, C. J. & Chown, S. L. Temperature- and body mass-related variation in cyclic gas exchange characteristics and metabolic rates of seven weevil species: broader implications. *Journal of Insect Physiology* (in press).
65. Gehrken, U. Physiology of diapause in the adult bark beetle, *Ips acuminatus* Gyll., studied in relation to cold hardiness. *Journal of Insect Physiology* **31(12)**, 909-916 (1985).

66. Campbell, A., Singh, N. B. & Sinha, R. N. Bioenergetics of the granary weevil, *Sitophilus granarius* (L.) (Coleoptera: Curculionidae). *Canadian Journal of Zoology* **54**, 786-798 (1976).
67. Sibul, I., Kuusik, A. & Voolma, K. Monitoring of gas exchange cycles and ventilatory movements in the pine weevil *Hylobius abietis*: respiratory failures evoked by a botanical insecticide. *Entomologia Experimentalis et Applicata* **110**, 173-179 (2004).
68. Chown, S. L., Van Der Merwe, M. & Smith, V. R. The influence of habitat and altitude on oxygen uptake in sub-antarctic weevils. *Physiological Zoology* **70**, 116-124 (1997).
69. Tombes, A. Respiratory and compositional study on the aestivating insect, *Hypera postica* (Gyll.) (Curculionidae). *Journal of Insect Physiology* **10**, 997-1003 (1964).
70. Lighton, J. R. B. Minimum cost of transport and ventilatory patterns in three African beetles. *Physiological Zoology* **58**, 390-399 (1985).
71. Schultz, T. D., Quinlan, M. C. & Hadley, N. F. Preferred body temperature, metabolic physiology, and water balance of adult *Cicindela longilabris*: A comparison of populations from boreal habitats and climatic refugia. *Physiological Zoology* **65**, 226-242 (1992).
72. May, M. L., Pearson, D. L. & Casey, T. M. Oxygen consumption of active and inactive adult tiger beetles. *Physiological Entomology* **11**, 171-179 (1986).
73. Chown, S. L. Thermal sensitivity of oxygen uptake of Diptera from sub-Antarctic South Georgia and Marion Island. *Polar Biology* **17**, 81-86 (1997).
74. Chadwick, L. E. The respiratory quotient of *Drosophila* in flight. *Biological Bulletin* **93**, 229-239 (1947).
75. Lehmann, F.-O., Dickinson, M. H. & Staunton, J. The scaling of carbon dioxide release and respiratory water loss in flying fruit flies (*Drosophila* spp.). *Journal of Experimental Biology* **203**, 1613-1624 (2000).
76. Chadwick, L. E. & Gilmour, D. Respiration during flight in *Drosophila repleta* Wollaston: the oxygen consumption considered in relation to the wing-rate. *Physiological Zoology* **13**, 398-410 (1940).
77. Rajagopal, P. K. & Bursell, E. The respiratory metabolism of resting tsetse flies. *Journal of Insect Physiology* **12**, 287-297 (1966).
78. Terblanche, J. S., Klok, C. J. & Chown, S. L. Metabolic rate variation in *Glossina pallidipes* (Diptera : Glossinidae): gender, ageing and repeatability. *Journal of Insect Physiology* **50**, 419-428 (2004).
79. Guerra, A. A. & Cochran, D. G. Respiration during the life cycle of the face fly. *Journal of Economic Entomology* **63**, 918-921 (1970).
80. Montooth, K. L. & Gibbs, A. G. Cuticular pheromones and water balance in the house fly, *Musca domestica*. *Comparative Biochemistry and Physiology A* **135**, 457-465 (2003).
81. Buck, J. B. & Keister, M. L. Respiration and water loss in the adult blowfly, *Phormia regina*, and their relation to the physiological action of DDT. *Biological Bulletin* **97**, 64-81 (1949).
82. Berrigan, D. & Lighton, J. R. B. Energetics of pedestrian locomotion in adult male blowflies, *Protophormia terraenovae* (Diptera: Calliphoridae). *Physiological Zoology* **67**, 1140-1153 (1994).
83. Morgan, K. R., Shelly, T. E. & Kimsey, L. S. Body temperature regulation, energy metabolism, and foraging in light-seeking and shade-seeking robber flies. *Journal of Comparative Physiology B* **155**, 561-570 (1985).
84. Hocking, B. The intrinsic range and speed of flight of insects. *Transactions of the Royal Entomological Society of London* **104**, 223-345 (1953).
85. Bartholomew, G. A. & Lighton, J. R. B. Endothermy and energy metabolism of a giant tropical fly, *Pantophthalmus tabaninus* Thunberg. *Journal of Comparative Physiology B* **156**, 461-467 (1986).
86. Penttinen, O.-P. & Holopainen, I. J. Physiological energetics of a midge, *Chironomus riparius* Meigen (Insecta, Diptera): normoxic heat output over the whole life cycle and response of larva to hypoxia and anoxia. *Oecologia* **103**, 419-424 (1995).
87. Gray, E. M. & Bradley, T. J. Metabolic rate in female *Culex tarsalis* (Diptera : Culicidae): Age, size, activity, and feeding effects. *Journal of Medical Entomology* **40**, 903-911 (2003).
88. Fielden, L. J., Krasnov, B. R., Khokhlova, I. S. & Arakelyan, M. S. Respiratory gas exchange in the desert flea *Xenopsylla ramesis* (Siphonaptera : Pulicidae): response

- to temperature and blood-feeding. *Comparative Biochemistry and Physiology A* **137**, 557-565 (2004).
89. Bartholomew, G. A. & Casey, T. M. Oxygen consumption of moths during rest, pre-flight warm-up, and flight in relation to body size and wing morphology. *Journal of Experimental Biology* **76**, 11-25 (1978).
  90. Bailey, C. G. & Singh, N. B. An energy budget for *Mamestra configurata* (Lepidoptera: Noctuidae). *Canadian Entomology* **109**, 687-693 (1977).
  91. Burkett, B. N. Respiration of *Galleria mellonella* in relation to temperature and oxygen. *Entomologia Experimentalis et Applicata* **5**, 305-312 (1962).
  92. Lewis, L. C., Mutchmor, J. A. & Lynch, R. E. Effect of *Perezia pyraustae* on oxygen consumption by the European corn borer, *Ostrinia nubilalis*. *Journal of Insect Physiology* **17**, 2457-2468 (1971).
  93. Lighton, J. R. B. & Lovegrove, B. G. A temperature-induced switch from diffusive to convective ventilation in the honeybee. *Journal of Experimental Biology* **154**, 509-516 (1990).
  94. Beekman, M. & Van Stratum, P. Respiration in bumblebee queens: effect of life phase on the discontinuous ventilation cycle. *Entomologia Experimentalis et Applicata* **92**, 295-298 (1999).
  95. Gäde, G. & Auerswald, L. Flight metabolism in carpenter bees and primary structure of their hypertrehalosaemic peptide. *Experimental Biology Online* **3** (1998).
  96. Duncan, F. D. & Lighton, J. R. B. Discontinuous ventilation and energetics of locomotion in the desert-dwelling female mutillid wasp, *Dasymutilla gloriosa*. *Physiological Entomology* **22**, 310-315 (1997).
  97. Nielsen, M. G. Respiratory rates of ants from different climatic areas. *Journal of Insect Physiology* **32**, 125-131 (1986).
  98. Martin, P. J. Respiration of the ant *Leptothorax unifasciatus* (Hymenoptera, Formicidae) at individual and society levels. *Journal of Insect Physiology* **37**, 311-318 (1991).
  99. Beraldo, M. J. A. H. & Mendes, E. G. The influence of temperature on oxygen consumption rates of workers of two leaf cutting ants, *Atta laevigata* (F. Smith, 1958) and *Atta sexdens rubropilosa* (Forel, 1908). *Comparative Biochemistry and Physiology A* **71**, 419-424 (1982).
  100. Hebling, M. J. A., Penteado, C. H. S. & Mendes, E. G. Respiratory regulation in workers of the leaf cutting ant *Atta sexdens rubropilosa* Forel, 1908. *Comparative Biochemistry and Physiology A* **101**, 319-322 (1992).
  101. Jensen, T. F. & Nielsen, M. G. The influence of body size and temperature on worker ant respiration. *Natura Jutlandica* **18**, 21-25 (1975).
  102. Quinlan, M. C. & Lighton, J. R. B. Respiratory physiology and water relations of three species of *Pogonomyrmex* harvester ants (Hymenoptera: Formicidae). *Physiological Entomology* **24**, 293-302 (1999).
  103. Eppershank, G. & Whitford, W. G. Oxygen consumption of two species of *Pogonomyrmex* harvester ants (Hymenoptera: Formicidae). *Comparative Biochemistry and Physiology A* **46**, 605-611 (1973).
  104. Nielsen, M. G. & Baroni-Urbani, C. Energetics and foraging behaviour of the European seed harvesting ant *Messor capitatus* I. Respiratory metabolism and energy consumption of unloaded and loaded workers during locomotion. *Physiological Entomology* **15**, 441-448 (1990).
  105. Lighton, J. R. B. & Berrigan, D. Questioning paradigms: caste-specific ventilation in harvester ants, *Messor pergandei* and *M. julianus* (Hymenoptera: Formicidae). *Journal of Experimental Biology* **198**, 521-530 (1995).
  106. Davison, E. A. Respiration and energy flow in two Australian species of desert harvester ants, *Chelaner rothsteini* and *Chelaner whitei*. *Journal of Arid Environments* **12**, 61-82 (1987).
  107. Vogt, J. T. & Appel, A. G. Standard metabolic rate of the fire ant, *Solenopsis invicta* Buren: effects of temperature, mass, and caste. *Journal of Insect Physiology* **45**, 655-666 (1999).
  108. Lighton, J. R. B. Slow discontinuous ventilation in the Namib dune-sea ant *Camponotus detritus* (Hymenoptera, Formicidae). *Journal of Experimental Biology* **151**, 71-82 (1990).

109. Lighton, J. R. B. Individual and whole-colony respiration in an African formicine ant. *Functional Ecology* **3**, 523-230 (1989).
110. Lighton, J. R. B. & Gillespie, R. G. The energetics of mimicry: the cost of pedestrian transport in a formicine ant and its mimic, a clubionid spider. *Physiological Entomology* **14**, 173-177 (1989).
111. Lighton, J. R. B. & Garrigan, D. Ant breathing: testing regulation mechanism hypotheses with hypoxia. *Journal of Experimental Biology* **198**, 1613-1620 (1995).
112. Lighton, J. R. B. & Wehner, R. Ventilation and respiratory metabolism in the thermophilic desert ant, *Cataglyphis bicolor* (Hymenoptera, Formicidae). *Journal of Comparative Physiology B* **163**, 11-17 (1993).
113. Duncan, F. D. & Crewe, R. M. A comparison of the energetics of foraging of three species of *Leptogenys* (Hymenoptera, Formicidae). *Physiological Entomology* **18**, 372-378 (1993).
114. Fewell, J. H., Harrison, J. F., Lighton, J. R. B. & Breed, M. D. Foraging energetics of the ant, *Paraponera clavata*. *Oecologia* **105**, 419-427 (1996).
115. Bartholomew, G. A., Lighton, J. R. B. & Feener, D. H. Energetics of trail running, load carriage, and emigration in the column-rading army ant *Eciton hamatum*. *Physiological Zoology* **61**, 57-68 (1988).
