# Supplementary material
Source: PubMed Central journal article supplement (PMC2579366)
Supplement: 0802148105_DS4_PDF.pdf [file 0802148105_DS4_PDF.pdf]

## Dataset S4. Standard and routine respiration rates in aquatic invertebrates

Notes to Table S4:

**Group (as shown in Table 1 in the paper):** I – copepods & krill (also includes seven branchiopods and two *Balanus* spp.), Crustacea; II – peracarids (amphipods, isopods, mysids, two cumaceans, as well as five (non-peracarid) ostracod species), Crustacea; III – decapods, Crustacea; IV – cephalopods, Mollusca; V – gelatinous invertebrates: chaetognaths and medusae.

**Higher taxon, Family:** taxonomic status, including family, was determined from various sources, including PubMed Taxonomy; World of Copepods (Smithsonian National Museum of Natural History), Integrated Taxonomic Information System ([www.itis.gov](http://www.itis.gov)) and metabolic data sources. Table S4 should NOT, however, be used as an authoritative reference for detailed invertebrate taxonomy.

**MIN:** for each species, indicates the minimum value of mass-specific metabolic rate corresponding to 25 °C. Data from rows marked “MIN” were used in the analyses shown in Table 1 and Figures 1-3 in the paper (a total of 376 values for 376 species).

**qWkg** is standard or routine respiration rate converted to  $W$  ( $\text{kg WM}^{-1}$ ) (Watts per kg wet mass) using the energy conversion factor of  $1 \text{ ml O}_2 = 20 \text{ J}$ . For crustaceans, the basis for this data set was formed by the data base of Alekseeva (2001) deposited at Koltzov Institute of Developmental Biology, Moscow, Russia and kindly provided to the authors by T.A. Alekseeva. This database contained 200 species, to which about one hundred species was added by the present authors by literature search. Usually, in metabolic studies animals were kept in filtered water for 12-24 hours or until their guts were empty. However, for some species, especially small marine ones (Ikeda & Skjoldal 1982) it was not possible to ensure that stomachs were empty. Where possible, respiration rates were measured on calm inactive animals. For each species, the minimum reported value was always used. To get an idea of how the reported metabolic rates are elevated above the "true" standard metabolic rate (sensu, e.g., Steffensen 2002), see SI Methods. Taking into account that in copepods the dry mass to wet mass ratio is somewhat less than the crude mean of 0.3 applied throughout the analysis (see SI Methods, Table S12a) (copepod DM/WM is about 0.17-0.20, see column WC below), even if "true" standard metabolic rate is approximately twice less than the measured group mean, while DM/WM ratio is about 1.5-2 times lower than 0.3, this means that if correction is made for the lower DM/WM content in copepods, our value of  $3 \text{ W kg}^{-1}$  is comparable to the other group means in the database. In gelatinous species (group V) (medusae and chaetognaths) with DM/WM ratio significantly smaller (by 7 and 3 times, respectively (Ikeda & Skjoldal 1989; Hirst & Lucas 1998)) than the crude mean DM/WM = 0.3 for the non-gelatinous groups, wet-mass based metabolic rates were multiplied by a factor of 7 and 3, respectively, to be comparable with the rest of the data base analysed assuming DM/WM = 0.3. For these species qWkg stands for the actual value multiplied by the corresponding factor (7 or 3). In cephalopods, minimum mass-specific metabolic rates for each of the 38 species studied by Seibel (2007) were included into the analysis. The data base of Seibel (2007) contains 218 values for 38 species, of which only minimum values for each species are reported here, those used for the analysis.

**TC** is ambient temperature during measurements, degrees Celsius.

**q25Wkg** is metabolic rate converted to 25 °C using  $Q_{10} = 2$ ,  $q25Wkg = qWkg \times 2^{(25 - TC)/10}$ , dimension W (kg WM)<sup>-1</sup>. For each species rows are arranged in the order of increasing **q25Wkg**.

**Mg** is wet body mass in grams; **DMg** is dry body mass in grams; **N/DM** is the nitrogen to dry mass ratio, where available; **WC** is water content in wet mass, %:  $WC = (1 - DM/WM) \times 100$ , values with questions (e.g., ?80) indicate that **qWkg** was obtained from dry-mass based measurements using an assumed WC determined from a different source than the source of metabolic data for that species.

| Group | Higher Taxon | Family        | Species                 | MIN | q25Wkg  | qWkg  | Mg        | TC   | DMg       | N/DM  | WC   | Source              |
|-------|--------------|---------------|-------------------------|-----|---------|-------|-----------|------|-----------|-------|------|---------------------|
| I     | 1.Copepoda   | Acartiidae    | Acartia clausi          | MIN | 5.2520  | 2.626 | 0.0000275 | 15   | 0.0000055 |       | 80   | Nival et al. 1972   |
| I     | 2.Copepoda   | Acartiidae    | Acartia clausi          |     | 7.5     | 2.0   | 0.000025  | 5.9  | 0.0000049 |       | ?80  | Conover 1960        |
| I     | 3.Copepoda   | Acartiidae    | Acartia clausi          |     | 8.3145  | 4.1   | 0.0000425 | 14.8 | 0.0000085 |       | ?80  | Ikeda et al. 2001   |
| I     | 4.Copepoda   | Acartiidae    | Acartia clausi          |     | 13.6    | 3.4   | 0.000021  | 5    | 0.0000041 |       | ?80  | Conover 1960        |
| I     | 5.Copepoda   | Acartiidae    | Acartia clausi          |     | 14.4    | 3.6   | 0.000024  | 5    | 0.0000047 |       | ?80  | Conover 1960        |
| I     | 6.Copepoda   | Acartiidae    | Acartia clausi          |     | 15.8    | 4.2   | 0.000022  | 5.9  | 0.0000044 |       | ?80  | Conover 1960        |
| I     | 7.Copepoda   | Acartiidae    | Acartia clausi          |     | 16.3    | 4.25  | 0.000037  | 5.6  | 0.0000073 |       | ?80  | Conover 1960        |
| I     | 8.Copepoda   | Acartiidae    | Acartia clausi          |     | 17.6    | 4.4   | 0.000036  | 5    | 0.0000072 |       | ?80  | Conover 1960        |
| I     | 9.Copepoda   | Acartiidae    | Acartia latisetosa      | MIN | 11.7    | 8.3   | 0.0000297 | 20   |           |       |      | Pavlova 1961        |
| I     | 10.Copepoda  | Acartiidae    | Acartia longiremis      | MIN | 11.1665 | 3.84  | 0.0000405 | 9.6  | 0.0000081 |       | ?80  | Ikeda et al. 2001   |
| I     | 11.Copepoda  | Acartiidae    | Acartia pacifica        | MIN | 6.1580  | 6.6   | 0.000039  | 26   | 0.0000078 |       | ?80  | Ikeda et al. 2001   |
| I     | 12.Copepoda  | Acartiidae    | Acartia tonsa           | MIN | 10.9572 | 8.9   | 0.000035  | 22   | 0.000007  |       | ?80  | Ikeda et al. 2001   |
| I     | 13.Copepoda  | Arietellidae  | Arietellus cf. plumifer | MIN | 0.880   | 0.220 | 0.0095    | 5    |           |       |      | Thuesen et al. 1998 |
| I     | 14.Copepoda  | Megacalanidae | Bathycalanus bradyi     | MIN | 0.5788  | 0.135 | 0.0299    | 4    | 0.0084    | 0.069 | 72   | Childress 1975      |
| I     | 15.Copepoda  | Megacalanidae | Bathycalanus bradyi     |     | 0.816   | 0.204 | 0.0555    | 5    |           |       |      | Thuesen et al. 1998 |
| I     | 16.Copepoda  | Megacalanidae | Bathycalanus bradyi     |     | 1.5862  | 0.370 | 0.0299    | 4    | 0.0084    | 0.069 | 72   | Childress 1975      |
| I     | 17.Copepoda  | Megacalanidae | Bathycalanus bradyi     |     | 0.736   | 0.184 | 0.0756    | 5    |           |       |      | Thuesen et al. 1998 |
| I     | 18.Copepoda  | Megacalanidae | Bathycalanus bradyi     |     | 1.071   | 0.210 | 0.0530    | 1.5  |           |       |      | Thuesen et al. 1998 |
| I     | 19.Copepoda  | Megacalanidae | Bathycalanus princeps   | MIN | 0.2280  | 0.059 | 0.0355    | 5.5  | 0.0070    | 0.096 | 80.2 | Childress 1975      |
| I     | 20.Copepoda  | Megacalanidae | Bathycalanus princeps   |     | 1.2634  | 0.327 | 0.0355    | 5.5  | 0.0070    | 0.096 | 80.2 | Childress 1975      |
| I     | 21.Copepoda  | Megacalanidae | Bathycalanus richard    | MIN | 0.732   | 0.183 | 0.0380    | 5    |           |       |      | Thuesen et al. 1998 |
| I     | 22.Copepoda  | Megacalanidae | Bathycalanus richardi   |     | 0.532   | 0.133 | 0.0560    | 5    |           |       |      | Thuesen et al. 1998 |
| I     | 23.Copepoda  | Megacalanidae | Bathycalanus richardi   |     | 1.193   | 0.234 | 0.0377    | 1.5  |           |       |      | Thuesen et al. 1998 |
| I     | 24.Copepoda  | Megacalanidae | Bathycalanus sp.        | MIN | 1.67    | 0.42  | 0.0895    | 5.1  | 0.0179    |       | ?80  | Conover 1960        |
| I     | 25.Copepoda  | Megacalanidae | Bathycalanus sp. A      | MIN | 0.816   | 0.204 | 0.0572    | 5    |           |       |      | Thuesen et al. 1998 |
| I     | 26.Copepoda  | Calanidae     | Calanoides acutus       | MIN | 0.9108  | 0.161 | 0.003329  | 0    | 0.00079   |       | 76.3 | Kawall et al. 2001  |
| I     | 27.Copepoda  | Calanidae     | Calanoides acutus       |     | 3.3841  | 0.59  | 0.002     | -0.2 | 0.000394  |       | ?80  | Ikeda et al. 2001   |
| I     | 28.Copepoda  | Calanidae     | Calanoides acutus       |     | 3.8652  | 0.66  | 0.0011    | -0.5 | 0.000218  |       | ?80  | Ikeda et al. 2001   |
| I     | 29.Copepoda  | Pontellidae   | Calanopia elliptica     | MIN | 4.7079  | 5.56  | 0.00028   | 27.4 | 0.000056  |       | ?80  | Ikeda et al. 2001   |
| I     | 30.Copepoda  | Calanidae     | Calanus cristatus       | MIN | 2.8473  | 1.094 | 0.00862   | 11.2 | 0.00169   |       |      | Ikeda 1971          |
| I     | 31.Copepoda  | Calanidae     | Calanus cristatus       |     | 2.9639  | 1.100 | 0.00908   | 10.7 | 0.00178   |       |      | Ikeda 1971          |
| I     | 32.Copepoda  | Calanidae     | Calanus cristatus       |     | 3.1012  | 1.167 | 0.00704   | 10.9 | 0.00138   |       |      | Ikeda 1971          |
| I     | 33.Copepoda  | Calanidae     | Calanus cristatus       |     | 6.0946  | 1.850 | 0.00918   | 7.8  | 0.0018    |       |      | Ikeda 1971          |
| I     | 34.Copepoda  | Calanidae     | Calanus cristatus       |     | 7.0211  | 2.161 | 0.00755   | 8    | 0.00148   |       |      | Ikeda 1971          |
| I     | 35.Copepoda  | Calanidae     | Calanus cristatus       |     | 7.4097  | 2.394 | 0.0076    | 8.7  | 0.00149   |       |      | Ikeda 1971          |
| I     | 36.Copepoda  | Calanidae     | Calanus finmarchicus    | MIN | 1.6     | 0.50  | 0.0017    | 8    | 0.000344  |       | ?80  | Conover 1960        |
| I     | 37.Copepoda  | Calanidae     | Calanus finmarchicus    |     | 3.6     | 1.06  | 0.00094   | 7.5  | 0.000188  |       | ?80  | Conover 1960        |

|   |             |                 |                          |     |         |        |           |       |           |        |      |                       |
|---|-------------|-----------------|--------------------------|-----|---------|--------|-----------|-------|-----------|--------|------|-----------------------|
| I | 38.Copepoda | Calanidae       | Calanus finmarchicus     |     | 7       | 1.25   | 0.0015    | 0.1   | 0.000387  | 0.0763 | 73.5 | Ikeda & Skjoldal 1989 |
| I | 39.Copepoda | Calanidae       | Calanus glacialis        | MIN | 7.8     | 1.73   | 0.002     | 3.5   | 0.000410  | 0.1121 | 79.7 | Ikeda & Skjoldal 1989 |
| I | 40.Copepoda | Calanidae       | Calanus glacialis        |     | 7.83    | 1.34   | 0.0024    | -0.5  | 0.000662  | 0.0969 | 76.6 | Ikeda & Skjoldal 1989 |
| I | 41.Copepoda | Calanidae       | Calanus helgolandicus    | MIN | 7.8180  | 3.909  | 0.000415  | 15    | 0.000086  |        | 83   | Nival et al. 1972     |
| I | 42.Copepoda | Calanidae       | Calanus helgolandicus    |     | 12.6912 | 4.487  | 0.000595  | 10    | 0.000119  |        | 80   | Nival et al. 1972     |
| I | 43.Copepoda | Calanidae       | Calanus hyperboreus      | MIN | 1.05    | 0.37   | 0.013     | 10    | 0.00368   |        | ??1  | Conover 1960          |
| I | 44.Copepoda | Calanidae       | Calanus hyperboreus      |     | 1.36    | 0.48   | 0.012     | 10    | 0.00362   |        | ??1  | Conover 1960          |
| I | 45.Copepoda | Calanidae       | Calanus hyperboreus      |     | 2.23    | 0.79   |           | 10    | 0.00155   |        | ??1  | Conover 1960          |
| I | 46.Copepoda | Calanidae       | Calanus hyperboreus      |     | 3.7     | 0.67   | 0.012     | 1.3   | 0.00395   | 0.0715 | 68   | Ikeda & Skjoldal 1989 |
| I | 47.Copepoda | Calanidae       | Calanus hyperboreus      |     | 3.72    | 0.70   | 0.0081    | 0.9   | 0.00194   | 0.0737 | 76.1 | Ikeda & Skjoldal 1989 |
| I | 48.Copepoda | Calanidae       | Calanus hyperboreus      |     | 3.9     | 0.68   | 0.0085    | -0.3  | 0.00268   | 0.0670 | 68.6 | Ikeda & Skjoldal 1989 |
| I | 49.Copepoda | Calanidae       | Calanus pacificus        | MIN | 8.3190  | 4.778  | 0.000513  | 17    | 0.00009   |        | 82.5 | Ikeda 1970            |
| I | 50.Copepoda | Calanidae       | Calanus propinquus       | MIN | 1.6631  | 0.294  | 0.004718  | 0     | 0.00101   |        | 78.5 | Kawall et al. 2001    |
| I | 51.Copepoda | Calanidae       | Calanus propinquus       |     | 5.4     | 0.89   | 0.0042    | -1    | 0.000847  | 0.123  | ??80 | Ikeda & Mitchell 1982 |
| I | 52.Copepoda | Calanidae       | Calanus propinquus       |     | 7.0936  | 1.17   | 0.0056    | -1    | 0.00104   | 0.125  | 81.4 | Ikeda 1988            |
| I | 53.Copepoda | Calanidae       | Calanus propinquus       |     | 7.6     | 1.26   | 0.0052    | -1    | 0.00104   | 0.125  | ??80 | Ikeda & Mitchell 1982 |
| I | 54.Copepoda | Calanidae       | Calanus tonsus           | MIN | 13.2049 | 2.178  | 0.001     | -1    | 0.0002    |        | 90   | Opalinski 1991        |
| I | 55.Copepoda | Calanidae       | Calanus vulgaris         | MIN | 16.6955 | 23.611 | 0.00106   | 30    | 0.00022   |        | 79.2 | Ikeda 1970            |
| I | 56.Copepoda | Candaciidae     | Candacia aethiopica      | MIN | 16.4076 | 21.278 | 0.00046   | 28.75 | 0.000065  |        | 85.9 | Ikeda 1970            |
| I | 57.Copepoda | Candaciidae     | Candacia columbiae       | MIN | 0.7091  | 0.194  | 0.00367   | 6.3   | 0.00042   |        | 88.6 | Ikeda 1970            |
| I | 58.Copepoda | Candaciidae     | Candacia columbiae       |     | 1.9341  | 0.544  | 0.00312   | 6.7   | 0.0006    |        | 80.8 | Ikeda 1970            |
| I | 59.Copepoda | Candaciidae     | Candacia sp.             | MIN | 20.4300 | 10.215 | 0.000155  | 15    | 0.000031  |        | 80   | Nival et al. 1972     |
| I | 60.Copepoda | Centropagidae   | Centropages abdominalis  | MIN | 10.5227 | 5.6    | 0.000085  | 15.9  | 0.000017  |        | ??80 | Ikeda et al. 2001     |
| I | 61.Copepoda | Centropagidae   | Centropages brachiatus   | MIN | 13.4364 | 6.4    | 0.0001    | 14.3  | 0.00002   |        | ??80 | Ikeda et al. 2001     |
| I | 62.Copepoda | Centropagidae   | Centropages kroyeri      | MIN | 9.4     | 6.7    | 0.000039  | 20    |           |        |      | Pavlova 1961          |
| I | 63.Copepoda | Centropagidae   | Centropages trispinosus  | MIN | 34.6199 | 24.48  | 0.000066  | 20    |           |        |      | Rajagopal 1962        |
| I | 64.Copepoda | Centropagidae   | Centropages trispinosus  |     | 35.5964 | 46.97  | 0.000066  | 29    | 0.000013  |        | 80.4 | Rajagopal 1962        |
| I | 65.Copepoda | Clausocalanidae | Clausocalanus furcatus   | MIN | 20.844  | 14.739 | 0.000019  | 20    |           |        |      | Pavlova 1975          |
| I | 66.Copepoda | Halocyprididae  | Conchoecia sp.           | MIN | 17.709  | 12.522 | 0.000045  | 20    |           |        |      | Pavlova 1975          |
| I | 67.Copepoda | Corycaeidae     | Corycaeus typicus        | MIN | 7.7660  | 3.883  | 0.0000515 | 15    | 0.0000103 |        | 80   | Nival et al. 1972     |
| I | 68.Copepoda | Heterorhabdidae | Disseta grandis          | MIN | 0.692   | 0.173  | 0.0114    | 5     |           |        |      | Thuesen et al. 1998   |
| I | 69.Copepoda | Heterorhabdidae | Disseta scopularis       | MIN | 0.332   | 0.083  | 0.0195    | 5     |           |        |      | Thuesen et al. 1998   |
| I | 70.Copepoda | Heterorhabdidae | Disseta scopularis       |     | 0.693   | 0.136  | 0.0257    | 1.5   |           |        |      | Thuesen et al. 1998   |
| I | 71.Copepoda | Aetideidae      | Euatideus giesbrechti    | MIN | 5.940   | 4.200  | 0.000215  | 20    |           |        |      | Pavlova 1975          |
| I | 72.Copepoda | Augaptilidae    | Euaugaptilus antarcticus | MIN | 0.512   | 0.128  | 0.0225    | 5     |           |        |      | Thuesen et al. 1998   |
| I | 73.Copepoda | Augaptilidae    | Euaugaptilus magnus      | MIN | 0.288   | 0.072  | 0.0309    | 5     |           |        |      | Thuesen et al. 1998   |
| I | 74.Copepoda | Augaptilidae    | Euaugaptilus nodifrons   | MIN | 0.280   | 0.070  | 0.0597    | 5     |           |        |      | Thuesen et al. 1998   |
| I | 75.Copepoda | Eucalanidae     | Eucalanus attenuatus     | MIN | 2.3980  | 1.199  | 0.001389  | 15    | 0.00025   |        | 82   | Nival et al. 1972     |
| I | 76.Copepoda | Eucalanidae     | Eucalanus attenuatus     |     | 6.2151  | 7.34   | 0.000685  | 27.4  | 0.000137  |        | ??80 | Ikeda et al. 2001     |
| I | 77.Copepoda | Eucalanidae     | Eucalanus bungii         | MIN | 1.8496  | 0.506  | 0.00822   | 6.3   | 0.00093   |        | 88.7 | Ikeda 1970            |
| I | 78.Copepoda | Eucalanidae     | Eucalanus bungii         |     | 2.2367  | 0.589  | 0.00807   | 5.75  | 0.00081   |        | 90   | Ikeda 1970            |
| I | 79.Copepoda | Eucalanidae     | Eucalanus bungii         |     | 3.2470  | 0.87   | 0.005     | 6     | 0.00101   |        | ??80 | Ikeda et al. 2001     |
| I | 80.Copepoda | Eucalanidae     | Eucalanus crassus        | MIN | 10.8093 | 15.500 | 0.00207   | 30.2  | 0.00036   |        | 82.6 | Ikeda 1970            |
| I | 81.Copepoda | Eucalanidae     | Eucalanus elongatus      | MIN | 1.870   | 1.322  | 0.001786  | 20    |           |        |      | Pavlova 1975          |
| I | 82.Copepoda | Eucalanidae     | Eucalanus elongatus      |     | 5.2060  | 2.603  | 0.00054   | 15    | 0.000108  |        | 80   | Nival et al. 1972     |
| I | 83.Copepoda | Eucalanidae     | Eucalanus marina         | MIN | 8.4832  | 10.444 | 0.00143   | 28    | 0.000234  |        | 83.7 | Ikeda 1970            |
| I | 84.Copepoda | Eucalanidae     | Eucalanus marina         |     | 11.6954 | 15.167 | 0.00082   | 28.75 | 0.000119  |        | 85.5 | Ikeda 1970            |
| I | 85.Copepoda | Eucalanidae     | Eucalanus monachus       | MIN | 16.8143 | 24.111 | 0.00145   | 30.2  | 0.00022   |        | 79.2 | Ikeda 1970            |
| I | 86.Copepoda | Eucalanidae     | Eucalanus mucronatus     | MIN | 3.8106  | 5.389  | 0.00072   | 30    | 0.00018   |        | 80.6 | Ikeda 1970            |
| I | 87.Copepoda | Eucalanidae     | Eucalanus subcrassus     | MIN | 7.5024  | 7.0    | 0.00052   | 24    | 0.000104  |        | ??80 | Ikeda et al. 2001     |
| I | 88.Copepoda | Eucalanidae     | Eucalanus subcrassus     |     | 18.2278 | 12.89  | 0.000191  | 20    |           |        |      | Rajagopal 1962        |
| I | 89.Copepoda | Eucalanidae     | Eucalanus subcrassus     |     | 19.0457 | 25.13  | 0.000191  | 29    | 0.0000375 |        | 80.4 | Rajagopal 1962        |

|   |              |                  |                          |     |         |        |           |      |            |        |                     |                       |
|---|--------------|------------------|--------------------------|-----|---------|--------|-----------|------|------------|--------|---------------------|-----------------------|
| I | 90.Copepoda  | Euchaetidae      | Euchaeta antarctica      | MIN | 1.0069  | 0.178  | 0.003     | 0    | 0.0006     | 80     | Opalinski 1991      |                       |
| I | 91.Copepoda  | Euchaetidae      | Euchaeta marina          | MIN | 5.4660  | 5.1    | 0.00146   | 24   | 0.000291   | ?80    | Ikeda et al. 2001   |                       |
| I | 92.Copepoda  | Euchaetidae      | Euchaeta plana           | MIN | 1.1160  | 0.7891 | 0.003     | 20   |            |        | Opalinski 1991      |                       |
| I | 93.Copepoda  | Euchaetidae      | Euchaeta plana           |     | 12.3641 | 15.222 | 0.00095   | 28   | 0.000158   | 83.4   | Ikeda 1970          |                       |
| I | 94.Copepoda  | Lucicitiidae     | Euchirella amoena        | MIN | 9.1606  | 11.278 | 0.00266   | 28   | 0.00056    | 79     | Ikeda 1970          |                       |
| I | 95.Copepoda  | Lucicitiidae     | Euchirella bitumida      | MIN | 1.196   | 0.299  | 0.0094    | 5    |            |        | Thuesen et al. 1998 |                       |
| I | 96.Copepoda  | Lucicitiidae     | Euchirella bitumida      |     | 1.417   | 0.278  | 0.0128    | 1.5  |            |        | Thuesen et al. 1998 |                       |
| I | 97.Copepoda  | Lucicitiidae     | Euchirella maxima        | MIN | 1.012   | 0.253  | 0.0188    | 5    |            |        | Thuesen et al. 1998 |                       |
| I | 98.Copepoda  | Lucicitiidae     | Euchirella rostrata      | MIN | 3.2340  | 1.617  | 0.00158   | 15   | 0.000316   | 80     | Nival et al. 1972   |                       |
| I | 99.Copepoda  | Lucicitiidae     | Euchirella rostrata      |     | 4.3     | 1.2    | 0.0045    | 6.5  | 0.000890   | ?80    | Conover 1960        |                       |
| I | 100.Copepoda | Lucicitiidae     | Euchirella rostrata      |     | 4.5     | 1.25   | 0.0041    | 6.5  | 0.000820   | ?80    | Conover 1960        |                       |
| I | 101.Copepoda | Lucicitiidae     | Euchirella rostrata      |     | 5.7     | 1.6    | 0.0047    | 6.5  | 0.000947   | ?80    | Conover 1960        |                       |
| I | 102.Copepoda | Tachidiidae      | Euterpina acutifrons     | MIN | 6.0220  | 3.011  | 0.0000107 | 15   | 0.00000214 | 80     | Nival et al. 1972   |                       |
| I | 103.Copepoda | Aetideidae       | Gaetanus antarcticus     | MIN | 0.459   | 0.090  | 0.0257    | 1.5  |            |        | Thuesen et al. 1998 |                       |
| I | 104.Copepoda | Aetideidae       | Gaetanus antarcticus     |     | 0.628   | 0.157  | 0.0257    | 5    |            |        | Thuesen et al. 1998 |                       |
| I | 105.Copepoda | Aetideidae       | Gaetanus kruppi          | MIN | 0.688   | 0.172  | 0.0072    | 5    |            |        | Thuesen et al. 1998 |                       |
| I | 106.Copepoda | Aetideidae       | Gaetanus pileatus        | MIN | 2.132   | 0.533  | 0.0085    | 5    |            |        | Thuesen et al. 1998 |                       |
| I | 107.Copepoda | Aetideidae       | Gaetanus tenuispinus     | MIN | 0.3168  | 0.056  | 0.00364   | 0    | 0.00545    | 85.0   | Kawall et al. 2001  |                       |
| I | 108.Copepoda | Metridiidae      | Gaussia princeps         | MIN | 0.2925  | 0.084  | 0.0328    | 7    | 0.0054     | 0.098  | 83.7                | Childress 1975        |
| I | 109.Copepoda | Metridinidae     | Gaussia princeps         |     | 0.956   | 0.239  | 0.0356    | 5    |            |        | Thuesen et al. 1998 |                       |
| I | 110.Copepoda | Metridinidae     | Gaussia princeps         |     | 1.5008  | 0.431  | 0.0328    | 7    | 0.0054     | 0.098  | 83.7                | Childress 1975        |
| I | 111.Copepoda | Metridinidae     | Gaussia princeps (males) |     | 1.032   | 0.258  | 0.0346    | 5    |            |        | Thuesen et al. 1998 |                       |
| I | 112.Copepoda | Augaptilidae     | Haloptilus longicornis   | MIN | 1.706   | 1.206  | 0.00022   | 20   |            |        | Pavlova 1975        |                       |
| I | 113.Copepoda | Augaptilidae     | Haloptilus longicornis   |     | 3.244   | 2.294  | 0.00016   | 20   |            |        | Pavlova 1975        |                       |
| I | 114.Copepoda | Heterorhabdidae  | Hemirhabdus grimaldii    | MIN | 0.252   | 0.063  | 0.0382    | 5    |            |        | Thuesen et al. 1998 |                       |
| I | 115.Copepoda | Heterorhabdidae  | Heterorhabdus farrani    | MIN | 2.2062  | 0.39   | 0.003215  | 0    | 0.00034    | 89.5   | Kawall et al. 2001  |                       |
| I | 116.Copepoda | Pontellidae      | Labidocera acuta         | MIN | 7.8458  | 10     | 0.00114   | 28.5 | 0.000228   | ?80    | Ikeda et al. 2001   |                       |
| I | 117.Copepoda | Pontellidae      | Labidocera acuta         |     | 9.6460  | 9.0    | 0.00117   | 24   | 0.000233   | ?80    | Ikeda et al. 2001   |                       |
| I | 118.Copepoda | Pontellidae      | Labidocera acuta         |     | 11.3533 | 16.056 | 0.00099   | 30   | 0.00017    | 82.8   | Ikeda 1970          |                       |
| I | 119.Copepoda | Pontellidae      | Labidocera detruncata    | MIN | 34.8814 | 42.944 | 0.00093   | 28   | 0.00015    | 83.9   | Ikeda 1970          |                       |
| I | 120.Copepoda | Pontellidae      | Labidocera jollae        | MIN | 3.7538  | 2.156  | 0.042     | 17   | 0.00645    | 84.5   | Childress 1975      |                       |
| I | 121.Copepoda | Pontellidae      | Labidocera jollae        |     | 3.8414  | 2.7163 | 0.0416    | 20   |            |        | Childress 1975      |                       |
| I | 122.Copepoda | Pontellidae      | Labidocera sp.           | MIN | 12.8849 | 18.222 | 0.00082   | 30   | 0.00018    | 78     | Ikeda 1970          |                       |
| I | 123.Copepoda | Scolecithricidae | Landrumius gigas         |     | 1.136   | 0.284  | 0.0309    | 5    |            |        | Thuesen et al. 1998 |                       |
| I | 124.Copepoda | Lucicitiidae     | Lucicutia bicornuta      | MIN | 0.548   | 0.137  | 0.0105    | 5    |            |        | Thuesen et al. 1998 |                       |
| I | 125.Copepoda | Lucicitiidae     | Lucicutia flavicornis    | MIN | 8.085   | 5.717  | 0.000129  | 20   |            |        | Pavlova 1975        |                       |
| I | 126.Copepoda | Lucicitiidae     | Lucicutia maxima         | MIN | 0.696   | 0.174  | 0.0118    | 5    |            |        | Thuesen et al. 1998 |                       |
| I | 127.Copepoda | Lucicitiidae     | Lucicutia maxima         |     | 0.749   | 0.147  | 0.0147    | 1.5  |            |        | Thuesen et al. 1998 |                       |
| I | 128.Copepoda | Lucicitiidae     | Lucicutia maxima         |     | 0.973   | 0.344  | 0.0104    | 10   |            |        | Thuesen et al. 1998 |                       |
| I | 129.Copepoda | Megacalanidae    | Megacalanus princeps     | MIN | 0.820   | 0.205  | 0.0556    | 5    |            |        | Thuesen et al. 1998 |                       |
| I | 130.Copepoda | Megacalanidae    | Megacalanus sp. A        | MIN | 0.880   | 0.220  | 0.0349    | 5    |            |        | Thuesen et al. 1998 |                       |
| I | 131.Copepoda | Megacalanidae    | Megacalanus sp. A        |     | 0.744   | 0.186  | 0.0345    | 5    |            |        | Thuesen et al. 1998 |                       |
| I | 132.Copepoda | Megacalanidae    | Megacalanus sp. A        |     | 0.918   | 0.180  | 0.0356    | 1.5  |            |        | Thuesen et al. 1998 |                       |
| I | 133.Copepoda | Megacalanidae    | Megacalanus sp. A        |     | 1.071   | 0.210  | 0.0345    | 1.5  |            |        | Thuesen et al. 1998 |                       |
| I | 134.Copepoda | Megacalanidae    | Megacalanus sp. A        |     | 1.321   | 0.467  | 0.0326    | 10   |            |        | Thuesen et al. 1998 |                       |
| I | 135.Copepoda | Megacalanidae    | Megacalanus sp. B        | MIN | 0.640   | 0.160  | 0.0372    | 5    |            |        | Thuesen et al. 1998 |                       |
| I | 136.Copepoda | Calanidae        | Mesocalanus tenuicornis  | MIN | 14.9269 | 7.889  | 0.000155  | 15.8 | 0.000031   | ?80    | Ikeda et al. 2001   |                       |
| I | 137.Copepoda | Metridinidae     | Metridia gerlachei       | MIN | 2.3250  | 0.411  | 0.001409  | 0    | 0.00025    | 82.2   | Kawall et al. 2001  |                       |
| I | 138.Copepoda | Metridinidae     | Metridia gerlachei       |     | 6.7     | 1.1    | 0.0011    | -1   | 0.000214   | 0.111  | ?80                 | Ikeda & Mitchell 1982 |
| I | 139.Copepoda | Metridinidae     | Metridia gerlachei       |     | 8.3526  | 1.34   | 0.0013    | -1.4 | 0.000265   | 0.114  | ?80                 | Ikeda & Mitchell 1982 |
| I | 140.Copepoda | Metridinidae     | Metridia longa           | MIN | 8.2     | 1.46   | 0.00155   | 0.1  | 0.000353   | 0.1044 | 77.2                | Ikeda & Skjoldal 1989 |
| I | 141.Copepoda | Metridinidae     | Metridia pacifica        | MIN | 4.2937  | 1.34   | 0.00074   | 8.2  | 0.000148   | ?80    | Ikeda et al. 2001   |                       |

|   |               |                |                          |     |         |       |           |      |             |        |                        |
|---|---------------|----------------|--------------------------|-----|---------|-------|-----------|------|-------------|--------|------------------------|
| I | 142. Copepoda | Metridinidae   | Metridia pacifica        |     | 7.4436  | 3.24  | 0.00047   | 13   | 0.000094    | ?      | Ikeda et al. 2001      |
| I | 143. Copepoda | Metridinidae   | Metridia princeps        | MIN | 0.808   | 0.202 | 0.0111    | 5    |             |        | Thuesen et al. 1998    |
| I | 144. Copepoda | Metridinidae   | Metridia princeps        |     | 1.300   | 0.255 | 0.0125    | 1.5  |             |        | Thuesen et al. 1998    |
| I | 145. Copepoda | Calanidae      | Nannocalanus minor       | MIN | 5.0843  | 5.8   | 0.0002    | 26.9 | 0.00004     | ?      | Ikeda et al. 2001      |
| I | 146. Copepoda | Calanidae      | Neocalanus cristatus     | MIN | 0.5466  | 0.111 | 0.023     | 2    | 0.00832     | 0.0675 | 63.9 Ikeda et al. 2004 |
| I | 147. Copepoda | Calanidae      | Neocalanus cristatus     |     | 0.5762  | 0.117 | 0.0172    | 2    | 0.00611     | 0.0833 | 63.7 Ikeda et al. 2004 |
| I | 148. Copepoda | Calanidae      | Neocalanus cristatus     |     | 0.6008  | 0.122 | 0.0264    | 2    | 0.00933     | 0.0741 | 64.5 Ikeda et al. 2004 |
| I | 149. Copepoda | Calanidae      | Neocalanus cristatus     |     | 0.6550  | 0.133 | 0.0242    | 2    | 0.00797     | 0.0586 | 67.2 Ikeda et al. 2004 |
| I | 150. Copepoda | Calanidae      | Neocalanus cristatus     |     | 0.6550  | 0.133 | 0.0269    | 2    | 0.00908     | 0.0609 | 65.6 Ikeda et al. 2004 |
| I | 151. Copepoda | Calanidae      | Neocalanus cristatus     |     | 0.6845  | 0.139 | 0.021     | 2    | 0.0068      | 0.0754 | 67.6 Ikeda et al. 2004 |
| I | 152. Copepoda | Calanidae      | Neocalanus cristatus     |     | 0.7387  | 0.150 | 0.0236    | 2    | 0.00865     | 0.0689 | 63.5 Ikeda et al. 2004 |
| I | 153. Copepoda | Calanidae      | Neocalanus cristatus     |     | 0.7929  | 0.161 | 0.0260    | 2    | 0.010       | 0.0687 | 61.3 Ikeda et al. 2004 |
| I | 154. Copepoda | Calanidae      | Neocalanus cristatus     |     | 0.8470  | 0.172 | 0.0195    | 2    | 0.00579     | 0.0810 | 70.3 Ikeda et al. 2004 |
| I | 155. Copepoda | Calanidae      | Neocalanus cristatus     |     | 0.8470  | 0.172 | 0.0221    | 2    | 0.00727     | 0.0697 | 67.8 Ikeda et al. 2004 |
| I | 156. Copepoda | Calanidae      | Neocalanus cristatus     |     | 0.9012  | 0.183 | 0.0206    | 2    | 0.00355     | 0.0901 | 82.9 Ikeda et al. 2004 |
| I | 157. Copepoda | Calanidae      | Neocalanus cristatus     |     | 0.9195  | 0.283 | 0.0192    | 8    | 0.00209     | 0.104  | 89.4 Ikeda et al. 2004 |
| I | 158. Copepoda | Calanidae      | Neocalanus cristatus     |     | 0.9554  | 0.194 | 0.0299    | 2    | 0.00663     | 0.085  | 77.7 Ikeda et al. 2004 |
| I | 159. Copepoda | Calanidae      | Neocalanus cristatus     |     | 1.2016  | 0.244 | 0.0153    | 2    | 0.00265     | 0.0863 | 83.1 Ikeda et al. 2004 |
| I | 160. Copepoda | Calanidae      | Neocalanus cristatus     |     | 1.2241  | 0.328 | 0.0166    | 6    | 0.00172     | 0.0960 | 89.8 Ikeda et al. 2004 |
| I | 161. Copepoda | Calanidae      | Neocalanus cristatus     |     | 1.2607  | 0.256 | 0.0226    | 2    | 0.00618     | 0.0685 | 72.2 Ikeda et al. 2004 |
| I | 162. Copepoda | Calanidae      | Neocalanus cristatus     |     | 2.2161  | 0.450 | 0.0202    | 2    | 0.00524     | 0.0775 | 74.1 Ikeda et al. 2004 |
| I | 163. Copepoda | Calanidae      | Neocalanus cristatus     |     | 2.2456  | 0.456 | 0.0090    | 2    | 0.0017      | 0.108  | 81.5 Ikeda et al. 2004 |
| I | 164. Copepoda | Calanidae      | Neocalanus cristatus     |     | 4.2767  | 1.17  | 0.008     | 6.3  | 0.001587    | ?      | Ikeda et al. 2001      |
| I | 165. Copepoda | Calanidae      | Neocalanus gracilis      | MIN | 5.2559  | 3.64  | 0.0025    | 19.7 | 0.0005      | ?      | Ikeda et al. 2001      |
| I | 166. Copepoda | Calanidae      | Neocalanus gracilis      |     | 6.2275  | 7.667 | 0.00212   | 28   | 0.00039     | 81.6   | Ikeda 1970             |
| I | 167. Copepoda | Calanidae      | Neocalanus plumchrus     | MIN | 3.2741  | 0.96  | 0.004     | 7.3  | 0.000785    | ?      | Ikeda et al. 2001      |
| I | 168. Copepoda | Calanidae      | Neocalanus plumchrus     |     | 4.1710  | 2.1   | 0.0015    | 15.1 | 0.000294    | ?      | Ikeda et al. 2001      |
| I | 169. Copepoda | Calanidae      | Neocalanus plumchrus     |     | 4.5277  | 1.18  | 0.0013    | 5.6  | 0.000263    | ?      | Ikeda et al. 2001      |
| I | 170. Copepoda | Oithonidae     | Oithona davisae          | MIN | 9.8500  | 9.85  | 0.0000030 | 25   | 0.000000575 | 81     | Castellani et al. 2005 |
| I | 171. Copepoda | Oithonidae     | Oithona minuta           | MIN | 29.9    | 21.1  | 0.0000039 | 20   |             |        | Pavlova 1961           |
| I | 172. Copepoda | Oithonidae     | Oithona nana             | MIN | 17.2360 | 7.0   | 0.0000026 | 12   | 0.0000005   | 81     | Castellani et al. 2005 |
| I | 173. Copepoda | Oithonidae     | Oithona plumifera        | MIN | 1.9292  | 1.8   | 0.0000089 | 24   | 0.0000017   | 81     | Castellani et al. 2005 |
| I | 174. Copepoda | Oithonidae     | Oithona setigera         | MIN | 6.4306  | 6.0   | 0.0000086 | 24   | 0.0000016   | 81     | Castellani et al. 2005 |
| I | 175. Copepoda | Oithonidae     | Oithona similis          | MIN | 0.4800  | 0.48  | 0.0000007 | 25   | 0.0000014   | ?      | Castellani et al. 2005 |
| I | 176. Copepoda | Oithonidae     | Oithona similis          |     | 7.8000  | 7.8   | 0.0000007 | 25   | 0.0000014   | ?      | Castellani et al. 2005 |
| I | 177. Copepoda | Oithonidae     | Oithona tenuis           | MIN | 5.8948  | 5.5   | 0.0000067 | 24   | 0.0000013   | 81     | Castellani et al. 2005 |
| I | 178. Copepoda | Oncaeididae    | Oncaea conifera          | MIN | 5.665   | 4.006 | 0.000006  | 20   |             |        | Pavlova 1975           |
| I | 179. Copepoda | Oncaeididae    | Oncaea mediterranea      | MIN | 6.655   | 4.706 | 0.0000062 | 20   |             |        | Pavlova 1975           |
| I | 180. Copepoda | Phaennidae     | Onchocalanus magnus      | MIN | 1.680   | 0.420 | 0.0124    | 5    |             |        | Thuesen et al. 1998    |
| I | 181. Copepoda | Augauptiliidae | Pachyptilus pacificus    | MIN | 0.692   | 0.173 | 0.0158    | 5    |             |        | Thuesen et al. 1998    |
| I | 182. Copepoda | Augauptiliidae | Pachyptilus pacificus    |     | 0.795   | 0.156 | 0.0158    | 1.5  |             |        | Thuesen et al. 1998    |
| I | 183. Copepoda | Paracalanidae  | Paracalanus parvus       | MIN | 19.5556 | 9.06  | 0.000019  | 13.9 | 0.0000038   | ?      | Ikeda et al. 2001      |
| I | 184. Copepoda | Euchaetidae    | Paraeuchaeta antarctica  | MIN | 0.7241  | 0.128 | 0.019551  | 0    | 0.004       | 79.3   | Kawall et al. 2001     |
| I | 185. Copepoda | Euchaetidae    | Paraeuchaeta birostrata  | MIN | 1.021   | 0.361 | 0.0129    | 10   |             |        | Thuesen et al. 1998    |
| I | 186. Copepoda | Euchaetidae    | Paraeuchaeta birostrata  |     | 1.156   | 0.289 | 0.0126    | 5    |             |        | Thuesen et al. 1998    |
| I | 187. Copepoda | Euchaetidae    | Paraeuchaeta brevicauda  | MIN | 0.912   | 0.228 | 0.0264    | 5    |             |        | Thuesen et al. 1998    |
| I | 188. Copepoda | Euchaetidae    | Paraeuchaeta californica | MIN | 1.204   | 0.301 | 0.0137    | 5    |             |        | Thuesen et al. 1998    |
| I | 189. Copepoda | Euchaetidae    | Paraeuchaeta japonica    | MIN | 2.3892  | 0.672 | 0.0093    | 6.7  | 0.00201     | 78.4   | Ikeda 1970             |
| I | 190. Copepoda | Euchaetidae    | Paraeuchaeta norvegica   | MIN | 1.39    | 0.49  | 0.0223    | 10   | 0.00459     | ?      | Conover 1960           |
| I | 191. Copepoda | Euchaetidae    | Paraeuchaeta norvegica   |     | 1.58    | 0.56  | 0.0194    | 10   | 0.00388     | ?      | Conover 1960           |
| I | 192. Copepoda | Euchaetidae    | Paraeuchaeta norvegica   |     | 1.81    | 0.64  | 0.0190    | 10   | 0.00380     | ?      | Conover 1960           |
| I | 193. Copepoda | Euchaetidae    | Paraeuchaeta rubra       | MIN | 0.848   | 0.212 | 0.0127    | 5    |             |        | Thuesen et al. 1998    |

|   |                   |                   |                            |     |         |        |           |       |           |        |      |                     |
|---|-------------------|-------------------|----------------------------|-----|---------|--------|-----------|-------|-----------|--------|------|---------------------|
| I | 194. Copepoda     | Euchaetidae       | Paraeuchaeta rubra         |     | 1.6251  | 0.33   | 0.0131    | 2     | 0.00383   | 0.0729 | 69.1 | Ikeda et al. 2004   |
| I | 195. Copepoda     | Euchaetidae       | Paraeuchaeta sesquipedalis | MIN | 1.020   | 0.255  | 0.0249    | 5     |           |        |      | Thuesen et al. 1998 |
| I | 196. Copepoda     | Euchaetidae       | Paraeuchaeta sp.           | MIN | 6.0641  | 1.072  | 0.017     | 0     | 0.003     |        | 83   | Opalinski 1991      |
| I | 197. Copepoda     | Euchaetidae       | Paraeuchaeta tonsa         | MIN | 2.164   | 0.541  | 0.0066    | 5     |           |        |      | Thuesen et al. 1998 |
| I | 198. Copepoda     | Metridinidae      | Pleuromamma abdominalis    | MIN | 4.895   | 3.461  | 0.00123   | 20    |           |        |      | Pavlova 1975        |
| I | 199. Copepoda     | Metridinidae      | Pleuromamma abdominalis    |     | 10.0140 | 5.007  | 0.000415  | 15    | 0.000083  |        | 80   | Nival et al. 1972   |
| I | 200. Copepoda     | Metridinidae      | Pleuromamma abdominalis    |     | 10.120  | 7.156  | 0.0008    | 20    |           |        |      | Pavlova 1975        |
| I | 201. Copepoda     | Metridinidae      | Pleuromamma gracilis       | MIN | 5.500   | 3.889  | 0.000270  | 20    |           |        |      | Pavlova 1975        |
| I | 202. Copepoda     | Metridinidae      | Pleuromamma gracilis       |     | 11.2580 | 5.629  | 0.0001875 | 15    | 0.0000375 |        | 80   | Nival et al. 1972   |
| I | 203. Copepoda     | Metridinidae      | Pleuromamma robusta        | MIN | 7.1     | 2.5    | 0.0014    | 8     | 0.000283  |        | ?80  | Conover 1960        |
| I | 204. Copepoda     | Metridinidae      | Pleuromamma robusta        |     | 10.1    | 3.1    | 0.0014    | 8     | 0.000283  |        | ?80  | Conover 1960        |
| I | 205. Copepoda     | Pontellidae       | Pontella danae             | MIN | 4.9369  | 5.44   | 0.0035    | 26.4  | 0.0007    |        | ?80  | Ikeda et al. 2001   |
| I | 206. Copepoda     | Pontellidae       | Pontella sp.               | MIN | 11.5880 | 5.794  | 0.000345  | 15    | 0.000069  |        | 80   | Nival et al. 1972   |
| I | 207. Copepoda     | Pseudocalanidae   | Pseudocalanus elongatus    | MIN | 8.6     | 6.1    | 0.000059  | 20    |           |        |      | Pavlova 1961        |
| I | 208. Copepoda     | Pseudocalanidae   | Pseudocalanus elongatus    |     | 11.5316 | 3.7    | 0.00006   | 8.6   | 0.000012  |        | ?80  | Ikeda et al. 2001   |
| I | 209. Copepoda     | Pseudocalanidae   | Pseudocalanus elongatus    |     | 17.2086 | 6.589  | 0.00004   | 11.15 | 0.0000012 |        | 70   | Ikeda 1970          |
| I | 210. Copepoda     | Lucicutiidae      | Pseudochirella polyspina   | MIN | 0.856   | 0.214  | 0.0117    | 5     |           |        |      | Thuesen et al. 1998 |
| I | 211. Copepoda     | Pseudodiaptomidae | Pseudodiaptomus marinus    | MIN | 9.2375  | 4.4    | 0.00007   | 14.3  | 0.000014  |        | ?80  | Ikeda et al. 2001   |
| I | 212. Copepoda     | Eucalanidae       | Rhincalanus gigas          | MIN | 0.5657  | 0.100  | 0.011692  | 0     | 0.00157   |        | 86.6 | Kawall et al. 2001  |
| I | 213. Copepoda     | Eucalanidae       | Rhincalanus gigas          |     | 2.8639  | 0.45   | 0.009     | -1.7  | 0.00180   |        | ?80  | Ikeda et al. 2001   |
| I | 214. Copepoda     | Eucalanidae       | Rhincalanus nasutus        | MIN | 0.5091  | 0.3600 | 0.024     | 20    |           |        |      | Opalinski 1991      |
| I | 215. Copepoda     | Eucalanidae       | Rhincalanus nasutus        |     | 1.4281  | 1.0098 | 0.009     | 20    |           |        |      | Opalinski 1991      |
| I | 216. Copepoda     | Eucalanidae       | Rhincalanus nasutus        |     | 1.4651  | 1.0360 | 0.015     | 20    |           |        |      | Opalinski 1991      |
| I | 217. Copepoda     | Eucalanidae       | Rhincalanus nasutus        |     | 2.38    | 0.66   | 0.0054    | 6.5   | 0.001079  |        | ?80  | Conover 1960        |
| I | 218. Copepoda     | Eucalanidae       | Rhincalanus nasutus        |     | 2.46    | 0.68   | 0.0051    | 6.5   | 0.001019  |        | ?80  | Conover 1960        |
| I | 219. Copepoda     | Eucalanidae       | Rhincalanus nasutus        |     | 2.63    | 0.73   | 0.00413   | 6.5   | 0.000826  |        | ?80  | Conover 1960        |
| I | 220. Copepoda     | Sapphirinidae     | Sapphirina gemma           | MIN | 7.5786  | 10.000 | 0.00071   | 29    | 0.00007   |        | 90.1 | Ikeda 1970          |
| I | 221. Copepoda     | Sapphirinidae     | Sapphirina gemma           |     | 29.9735 | 42.389 | 0.001     | 30    | 0.00008   |        | 92   | Ikeda 1970          |
| I | 222. Copepoda     | Scolecithrichidae | Scolecithrix danae         | MIN | 3.080   | 2.178  | 0.00300   | 20    |           |        |      | Pavlova 1975        |
| I | 223. Copepoda     | Temoridae         | Temora longicornis         | MIN | 36.6506 | 48.36  | 0.000061  | 29    | 0.000012  |        | 80.4 | Rajagopal 1962      |
| I | 224. Copepoda     | Tortanidae        | Tortanus discaudatus       | MIN | 8.1484  | 2.34   | 0.000285  | 7     | 0.000057  |        | ?80  | Ikeda et al. 2001   |
| I | 225. Copepoda     | Tortanidae        | Tortanus discaudatus       |     | 16.5565 | 6.3393 | 0.0002    | 11.15 | 0.00005   |        | 75   | Ikeda 1970          |
| I | 226. Copepoda     | Tortanidae        | Tortanus gracilis          | MIN | 6.1767  | 6.62   | 0.00012   | 26    | 0.000024  |        | ?80  | Ikeda et al. 2001   |
| I | 227. Copepoda     | Calanidae         | Undinula vulgaris          | MIN | 6.4355  | 5.80   | 0.000925  | 23.5  | 0.000185  |        | ?80  | Ikeda et al. 2001   |
| I | 228. Copepoda     | Calanidae         | Undinula vulgaris          |     | 7.7663  | 9.3    | 0.000838  | 27.6  | 0.000167  |        | ?80  | Ikeda et al. 2001   |
| I | 229. Calanoida    | Euchaetidae       | Valdiviella oligartha      | MIN | 0.752   | 0.188  | 0.0194    | 5     |           |        |      | Thuesen et al. 1998 |
| I | 230. Euphausiacea | Euphausiidae      | Euphausia crystallorophias | MIN | 1.8213  | 0.311  | 0.05      | -0.5  | 0.01      |        | 80   | Opalinski 1991      |
| I | 231. Euphausiacea | Euphausiidae      | Euphausia crystallorophias |     | 3.4145  | 0.544  | 0.09      | -1.5  | 0.018     |        | 80   | Opalinski 1991      |
| I | 232. Euphausiacea | Euphausiidae      | Euphausia crystallorophias |     | 3.6714  | 0.589  | 0.03      | -1.4  | 0.006     |        | 80   | Opalinski 1991      |
| I | 233. Euphausiacea | Euphausiidae      | Euphausia crystallorophias |     | 4.1750  | 0.656  | 0.211     | -1.7  | 0.047     |        | 78   | Opalinski 1991      |
| I | 234. Euphausiacea | Euphausiidae      | Euphausia crystallorophias |     | 4.3468  | 0.683  | 0.079     | -1.7  | 0.017     |        | 78.5 | Opalinski 1991      |
| I | 235. Euphausiacea | Euphausiidae      | Euphausia crystallorophias |     | 5.3396  | 0.839  | 0.249     | -1.7  | 0.05      |        | 80   | Opalinski 1991      |
| I | 236. Euphausiacea | Euphausiidae      | Euphausia crystallorophias |     | 6.8025  | 1.122  | 0.053     | -1    | 0.011     |        | 79.3 | Opalinski 1991      |
| I | 237. Euphausiacea | Euphausiidae      | Euphausia mutica           | MIN | 14.5222 | 18.833 | 0.00326   | 28.75 | 0.00042   |        | 87.1 | Ikeda 1970          |
| I | 238. Euphausiacea | Euphausiidae      | Euphausia pacifica         | MIN | 1.3378  | 0.473  | 0.0338    | 10    | 0.0070    | 0.123  | 79.4 | Childress 1975      |
| I | 239. Euphausiacea | Euphausiidae      | Euphausia pacifica         |     | 4.5504  | 2.650  | 0.0177    | 17.2  | 0.0033    |        | 81.4 | Ikeda 1970          |
| I | 240. Euphausiacea | Euphausiidae      | Euphausia pacifica         |     | 9.1754  | 3.244  | 0.0338    | 10    | 0.0070    | 0.123  | 79.4 | Childress 1975      |
| I | 241. Euphausiacea | Euphausiidae      | Euphausia superba          | MIN | 2.9102  | 0.48   | 1.43      | -1.0  | 0.35378   | 0.103  | 75.3 | Ikeda 1988          |
| I | 242. Euphausiacea | Euphausiidae      | Euphausia superba          |     | 3.0647  | 0.502  | 0.145     | -1.1  | 0.02703   | 0.110  | 81.4 | Ikeda 1988          |
| I | 243. Euphausiacea | Euphausiidae      | Euphausia superba          |     | 3.0647  | 0.502  | 1.01      | -1.1  | 0.23768   | 0.102  | 76.4 | Ikeda 1988          |
| I | 244. Euphausiacea | Euphausiidae      | Euphausia superba          |     | 3.1197  | 0.511  | 0.369     | -1.1  | 0.07677   | 0.102  | 79.2 | Ikeda 1988          |
| I | 245. Euphausiacea | Euphausiidae      | Euphausia superba          |     | 3.2051  | 0.525  | 0.616     | -1.1  | 0.14286   | 0.099  | 76.8 | Ikeda 1988          |

|   |      |              |                |                       |     |         |        |            |       |            |        |      |                           |
|---|------|--------------|----------------|-----------------------|-----|---------|--------|------------|-------|------------|--------|------|---------------------------|
| I | 246. | Euphausiacea | Euphausiidae   | Euphausia tricantha   | MIN | 2.4718  | 0.44   | 0.32       | 0.1   | 0.08283    | 0.107  | 74.1 | Ikeda 1988                |
| I | 247. | Euphausiacea | Euphausiidae   | Thysanoessa inermis   | MIN | 1.2     | 1.004  | 0.017      | 0.1   | 0.00457    | 0.1004 | 74.1 | Ikeda & Skjoldal 1989     |
| I | 248. | Euphausiacea | Euphausiidae   | Thysanoessa inermis   |     | 3.5     | 0.71   | 0.108      | 1.9   | 0.03478    | 0.0744 | 67.8 | Ikeda & Skjoldal 1989     |
| I | 249. | Euphausiacea | Euphausiidae   | Thysanoessa inermis   |     | 5.8987  | 2.306  | 0.00801    | 11.45 | 0.00119    |        | 85.1 | Ikeda 1970                |
| I | 250. | Euphausiacea | Euphausiidae   | Thysanoessa macrura   | MIN | 0.9780  | 0.167  | 0.05       | -0.5  | 0.01       |        | 80   | Opalinski 1991            |
| I | 251. | Euphausiacea | Euphausiidae   | Thysanoessa macrura   |     | 2.0189  | 0.333  | 0.006      | -1    | 0.001      |        | 83   | Opalinski 1991            |
| I | 252. | Euphausiacea | Euphausiidae   | Thysanoessa macrura   |     | 2.0856  | 0.344  | 0.009      | -1    | 0.002      |        | 78   | Opalinski 1991            |
| I | 253. | Euphausiacea | Euphausiidae   | Thysanoessa macrura   |     | 2.1556  | 0.400  | 0.05       | 0.7   | 0.01       |        | 80   | Opalinski 1991            |
| I | 254. | Euphausiacea | Euphausiidae   | Thysanoessa macrura   |     | 2.7287  | 0.517  | 0.09       | 1     | 0.019      |        | 79   | Opalinski 1991            |
| I | 255. | Euphausiacea | Euphausiidae   | Thysanoessa macrura   |     | 2.8344  | 0.600  | 0.034      | 2.6   | 0.007      |        | 79.4 | Opalinski 1991            |
| I | 256. | Euphausiacea | Euphausiidae   | Thysanoessa macrura   |     | 2.9926  | 0.511  | 0.05       | -0.5  | 0.01       |        | 80   | Opalinski 1991            |
| I | 257. | Euphausiacea | Euphausiidae   | Thysanoessa raschii   | MIN | 3.0116  | 0.850  | 0.107      | 6.75  | 0.0185     |        | 82.7 | Ikeda 1970                |
| I | 258. | Euphausiacea | Euphausiidae   | Thysanoessa raschii   |     | 3.8371  | 1.083  | 0.108      | 6.75  | 0.0175     |        | 83.4 | Ikeda 1970                |
| I | 259. | Euphausiacea | Euphausiidae   | Thysanoessa raschii   |     | 4.5829  | 1.289  | 0.0466     | 6.7   | 0.008      |        | 82.8 | Ikeda 1970                |
| I | 260. | Euphausiacea | Euphausiidae   | Thysanopoda cornuta   | MIN | 0.8400  | 0.21   | 5.88       | 5     |            |        |      | Cowles et al. 1991        |
| I | 261. | Branchiopoda | Daphnidae      | Daphnia ambigua       | MIN | 9.6225  | 6.006  | 0.0000197  | 18.2  | 0.00000387 |        | 80.4 | Armitage & Lei 1979       |
| I | 262. | Branchiopoda | Daphnidae      | Daphnia ambigua       |     | 13.045  | 11.278 | 0.000019   | 22.9  |            |        | 80.4 | Armitage & Lei 1979       |
| I | 263. | Branchiopoda | Daphnidae      | Daphnia ambigua       |     | 13.050  | 11.283 | 0.000019   | 22.9  | 0.00000372 |        | 80.4 | Armitage & Lei 1979       |
| I | 264. | Branchiopoda | Daphnidae      | Daphnia ambigua       |     | 13.643  | 15.244 | 0.0000184  | 26.6  | 0.00000362 |        | 80.4 | Armitage & Lei 1979       |
| I | 265. | Branchiopoda | Daphnidae      | Daphnia ambigua       |     | 13.918  | 12.033 | 0.0000308  | 22.9  | 0.00000573 |        | 80.4 | Armitage & Lei 1979       |
| I | 266. | Branchiopoda | Daphnidae      | Daphnia ambigua       |     | 14.041  | 12.139 | 0.0000178  | 22.9  | 0.00000349 |        | 80.4 | Armitage & Lei 1979       |
| I | 267. | Branchiopoda | Daphnidae      | Daphnia ambigua       |     | 14.368  | 12.422 | 0.0000287  | 22.9  | 0.00000563 |        | 80.4 | Armitage & Lei 1979       |
| I | 268. | Branchiopoda | Daphnidae      | Daphnia ambigua       |     | 16.573  | 14.328 | 0.0000221  | 22.9  | 0.00000434 |        | 80.4 | Armitage & Lei 1979       |
| I | 269. | Branchiopoda | Daphnidae      | Daphnia ambigua       |     | 16.759  | 14.489 | 0.0000265  | 22.9  | 0.00000520 |        | 80.4 | Armitage & Lei 1979       |
| I | 270. | Branchiopoda | Daphnidae      | Daphnia ambigua       |     | 17.196  | 14.867 | 0.0000136  | 22.9  | 0.00000266 |        | 80.4 | Armitage & Lei 1979       |
| I | 271. | Branchiopoda | Daphnidae      | Daphnia ambigua       |     | 17.775  | 7.900  | 0.0000251  | 13.3  | 0.0000049  |        | 80.4 | Armitage & Lei 1979       |
| I | 272. | Branchiopoda | Daphnidae      | Daphnia ambigua       |     | 25.254  | 21.833 | 0.00000893 | 22.9  | 0.00000175 |        | 80.4 | Armitage & Lei 1979       |
| I | 273. | Branchiopoda | Daphnidae      | Daphnia ambigua       |     | 26.435  | 7.333  | 0.0000047  | 6.5   |            |        |      | Armitage & Lei 1979       |
| I | 274. | Branchiopoda | Daphnidae      | Daphnia ambigua       |     | 26.597  | 7.378  | 0.0000258  | 6.5   | 0.00000507 |        | 80.4 | Armitage & Lei 1979       |
| I | 275. | Branchiopoda | Daphnidae      | Daphnia ambigua       |     | 29.620  | 10.400 | 0.0000267  | 9.9   | 0.00000524 |        | 80.4 | Armitage & Lei 1979       |
| I | 276. | Branchiopoda | Daphnidae      | Daphnia ambigua       |     | 31.320  | 27.078 | 0.00000597 | 22.9  | 0.00000117 |        | 80.4 | Armitage & Lei 1979       |
| I | 277. | Branchiopoda | Daphnidae      | Daphnia ambigua       |     | 32.898  | 12.728 | 0.0000254  | 11.3  | 0.00000498 |        | 80.4 | Armitage & Lei 1979       |
| I | 278. | Branchiopoda | Daphnidae      | Daphnia ambigua       |     | 33.608  | 29.056 | 0.00000587 | 22.9  | 0.00000150 |        | 80.4 | Armitage & Lei 1979       |
| I | 279. | Branchiopoda | Daphnidae      | Daphnia magma         | MIN | 26.713  | 18.889 | 0.00015    | 20    |            |        |      | Schindler 1968            |
| I | 280. | Branchiopoda | Daphnidae      | Daphnia magma         |     | 28.288  | 7.072  | 0.000146   | 5     |            |        |      | Goss & Bunting 1980       |
| I | 281. | Branchiopoda | Daphnidae      | Daphnia magma         |     | 29.855  | 21.111 | 0.0001     | 20    |            |        |      | Schindler 1968            |
| I | 282. | Branchiopoda | Daphnidae      | Daphnia magma         |     | 32.997  | 23.333 | 0.00005    | 20    |            |        |      | Schindler 1968            |
| I | 283. | Branchiopoda | Daphnidae      | Daphnia magma         |     | 35.386  | 12.511 | 0.000118   | 10    |            |        |      | Goss & Bunting 1980       |
| I | 284. | Branchiopoda | Daphnidae      | Daphnia magma         |     | 36.195  | 25.594 | 0.000061   | 20    |            |        |      | Goss & Bunting 1980       |
| I | 285. | Branchiopoda | Daphnidae      | Daphnia magma         |     | 38.034  | 19.017 | 0.000087   | 15    |            |        |      | Goss & Bunting 1980       |
| I | 286. | Branchiopoda | Daphnidae      | Daphnia magma         |     | 47.600  | 47.600 | 0.000066   | 25    |            |        |      | Goss & Bunting 1980       |
| I | 287. | Branchiopoda | Daphnidae      | Daphnia pulex         | MIN | 37.668  | 9.417  | 0.000581   | 5     |            |        |      | Goss & Bunting 1980       |
| I | 288. | Branchiopoda | Daphnidae      | Daphnia pulex         |     | 42.285  | 14.950 | 0.000481   | 10    |            |        |      | Goss & Bunting 1980       |
| I | 289. | Branchiopoda | Daphnidae      | Daphnia pulex         |     | 51.147  | 36.167 | 0.000055   | 20    |            |        |      | Ikeda 1970                |
| I | 290. | Branchiopoda | Daphnidae      | Daphnia pulex         |     | 58.139  | 82.222 | 0.000147   | 30    |            |        |      | Goss & Bunting 1980       |
| I | 291. | Branchiopoda | Daphnidae      | Daphnia pulex         |     | 64.067  | 64.067 | 0.0002     | 25    |            |        |      | Goss & Bunting 1980       |
| I | 292. | Branchiopoda | Daphnidae      | Daphnia pulex         |     | 65.548  | 46.350 | 0.000208   | 20    |            |        |      | Goss & Bunting 1980       |
| I | 293. | Branchiopoda | Daphnidae      | Daphnia pulex         |     | 65.556  | 32.778 | 0.000374   | 15    |            |        |      | Goss & Bunting 1980       |
| I | 294. | Branchiopoda | Daphnidae      | Daphnia pulex         |     | 132.489 | 103.9  | 0.0006     | 21.5  |            |        |      | Ikeda 1970                |
| I | 295. | Branchiopoda | Sididae        | Penilia avirostris    | MIN | 3.1     | 2.2    | 0.00004    | 20    |            |        |      | Pavlova 1961              |
| I | 296. | Branchiopoda | Podonidae      | Podon polyphemoides   | MIN | 4.2     | 2.9    | 0.00012    | 20    |            |        |      | Pavlova 1961              |
| I | 297. | Branchiopoda | Polyartemiidae | Polyartemia forcipata | MIN | 2.8284  | 2.000  | 0.00769    | 20    |            |        |      | Ivanova & Korobtsova 1974 |

|    |                  |                |                          |     |         |        |         |     |         |       |                                            |                |
|----|------------------|----------------|--------------------------|-----|---------|--------|---------|-----|---------|-------|--------------------------------------------|----------------|
| I  | 298.Branchiopoda | Triopsidae     | Triops cancriformis      | MIN | 1.6     | 1.1    | 0.230   | 20  | 0.019   | 91.7  | Tscherbakov & Muragina 1953                |                |
| I  | 299.Branchiopoda | Triopsidae     | Triops cancriformis      |     | 1.7     | 1.2    | 0.340   | 20  | 0.028   | 91.8  | Tscherbakov & Muragina 1953                |                |
| I  | 300.Branchiopoda | Triopsidae     | Triops cancriformis      |     | 1.75    | 1.24   | 0.410   | 20  | 0.035   | 91.5  | Tscherbakov & Muragina 1953                |                |
| I  | 301.Branchiopoda | Triopsidae     | Triops cancriformis      |     | 3.1     | 2.2    | 0.190   | 20  | 0.0185  | 90.3  | Tscherbakov & Muragina 1953                |                |
| I  | 302.Branchiopoda | Triopsidae     | Triops cancriformis      |     | 3.5     | 2.5    | 0.160   | 20  | 0.0135  | 91.6  | Tscherbakov & Muragina 1953                |                |
| I  | 303.Thoracica    | Balanidae      | Balanus balanoides       | MIN | 2.3480  | 0.5870 | 0.0046  | 5   | 0.00122 | 73.7  | Barnes & Barnes 1969                       |                |
| I  | 304.Thoracica    | Balanidae      | Balanus balanoides       |     | 3.1113  | 2.2000 | 0.005   | 20  | 0.00131 | 73.7  | Barnes & Barnes 1969                       |                |
| I  | 305.Thoracica    | Balanidae      | Balanus balanoides       |     | 3.5790  | 1.7895 | 0.0076  | 15  | 0.002   | 73.7  | Barnes & Barnes 1969                       |                |
| I  | 306.Thoracica    | Balanidae      | Balanus balanoides       |     | 3.5915  | 1.2698 | 0.0063  | 10  | 0.00167 | 73.7  | Barnes & Barnes 1969                       |                |
| I  | 307.Thoracica    | Balanidae      | Balanus balanus          | MIN | 0.7238  | 0.5118 | 0.1129  | 20  |         |       | Barnes & Barnes 1969                       |                |
| I  | 308.Thoracica    | Balanidae      | Balanus balanus          |     | 0.7328  | 0.5182 | 0.11    | 20  | 0.0297  | 73.7  | Barnes & Barnes 1969                       |                |
| I  | 309.Thoracica    | Balanidae      | Balanus balanus          |     | 0.7520  | 0.1880 | 0.117   | 5   | 0.0309  | 73.7  | Barnes & Barnes 1969                       |                |
| I  | 310.Thoracica    | Balanidae      | Balanus balanus          |     | 0.9348  | 0.4674 | 0.092   | 15  | 0.0242  | 73.7  | Barnes & Barnes 1969                       |                |
| I  | 311.Thoracica    | Balanidae      | Balanus balanus          |     | 0.9704  | 0.3431 | 0.102   | 10  | 0.0269  | 73.7  | Barnes & Barnes 1969                       |                |
| I  | 312.Thoracica    | Balanidae      | Balanus balanus          |     | 0.9745  | 0.6891 | 0.092   | 20  |         |       | Barnes & Barnes 1969                       |                |
| I  | 313.Thoracica    | Balanidae      | Balanus balanus          |     | 3.2022  | 2.2643 | 0.00498 | 20  |         |       | Barnes & Barnes 1969                       |                |
| I  | 314.Thoracica    | Balanidae      | Balanus balanus          |     | 3.7059  | 2.6205 | 0.0076  | 20  |         |       | Barnes & Barnes 1969                       |                |
| II | 315.Isopoda      | Aegidae        | Aega sp.                 | MIN | 4.5373  | 2.606  | 0.026   | 17  | 0.00664 | 74.4  | Ikeda 1970                                 |                |
| II | 316.Mysidacea    | Mysidae        | Antarctomysis maxima     | MIN | 1.6065  | 1.1360 | 0.721   | 20  |         |       | Opalinski 1991                             |                |
| II | 317.Isopoda      | Anuropidae     | Anuropus bathypelagicus  | MIN | 0.0889  | 0.023  | 3.45    | 5.5 | 0.95    | 0.029 | 72.4                                       | Childress 1975 |
| II | 318.Isopoda      | Anuropidae     | Anuropus bathypelagicus  |     | 0.4984  | 0.129  | 3.45    | 5.5 | 0.95    | 0.029 | 72.4                                       | Childress 1975 |
| II | 319.Mysidacea    | Mysidae        | Archaeomysis grebnitzkii | MIN | 1.6541  | 1.1696 | 0.0106  | 20  |         |       | Jawed 1973                                 |                |
| II | 320.Mysidacea    | Mysidae        | Archaeomysis grebnitzkii |     | 1.7225  | 1.2180 | 0.00935 | 20  |         |       | Jawed 1973                                 |                |
| II | 321.Mysidacea    | Mysidae        | Archaeomysis grebnitzkii |     | 1.8013  | 1.2737 | 0.00806 | 20  |         |       | Jawed 1973                                 |                |
| II | 322.Mysidacea    | Mysidae        | Archaeomysis grebnitzkii |     | 1.8451  | 1.3047 | 0.00645 | 20  |         |       | Jawed 1973                                 |                |
| II | 323.Mysidacea    | Mysidae        | Archaeomysis grebnitzkii |     | 1.8661  | 1.3195 | 0.0071  | 20  |         |       | Jawed 1973                                 |                |
| II | 324.Mysidacea    | Mysidae        | Archaeomysis grebnitzkii |     | 2.3404  | 1.6549 | 0.00339 | 20  |         |       | Jawed 1973                                 |                |
| II | 325.Mysidacea    | Mysidae        | Archaeomysis grebnitzkii |     | 2.5070  | 1.7727 | 0.00269 | 20  |         |       | Jawed 1973                                 |                |
| II | 326.Mysidacea    | Mysidae        | Archaeomysis grebnitzkii |     | 3.1352  | 2.2169 | 0.00124 | 20  |         |       | Jawed 1973                                 |                |
| II | 327.Mysidacea    | Mysidae        | Archaeomysis grebnitzkii |     | 3.3057  | 2.3375 | 0.00108 | 20  |         |       | Jawed 1973                                 |                |
| II | 328.Isopoda      | Armadillidae   | Armadillidium nasatum    | MIN | 1.0235  | 0.7237 | 0.03    | 20  |         |       | Reichle 1968                               |                |
| II | 329.Isopoda      | Armadillidae   | Armadillidium pallasii   | MIN | 0.707   | 0.500  | 0.27    | 20  |         |       | Byzova 1973                                |                |
| II | 330.Isopoda      | Armadillidae   | Armadillidium pallasii   |     | 0.731   | 0.517  | 0.1     | 20  |         |       | Byzova 1973 (data of Müller 1943)          |                |
| II | 331.Isopoda      | Armadillidae   | Armadillidium pallasii   |     | 0.747   | 0.528  | 0.16    | 20  |         |       | Byzova 1973 (data of Müller 1943)          |                |
| II | 332.Isopoda      | Armadillidae   | Armadillidium pallasii   |     | 0.817   | 0.578  | 0.13    | 20  |         |       | Byzova 1973 (data of Müller 1943)          |                |
| II | 333.Isopoda      | Armadillidae   | Armadillidium pallasii   |     | 0.935   | 0.661  | 0.05    | 20  |         |       | Byzova 1973 (data of Müller 1943)          |                |
| II | 334.Isopoda      | Armadillidae   | Armadillidium pallasii   |     | 1.100   | 0.778  | 0.09    | 20  |         |       | Byzova 1973                                |                |
| II | 335.Isopoda      | Armadillidae   | Armadillidium pallasii   |     | 1.242   | 0.878  | 0.03    | 20  |         |       | Byzova 1973 (data of Müller 1943)          |                |
| II | 336.Isopoda      | Armadillidae   | Armadillidium pallasii   |     | 1.414   | 1.000  | 0.015   | 20  |         |       | Byzova 1973 (data of Müller 1943)          |                |
| II | 337.Isopoda      | Armadillidae   | Armadillidium pallasii   |     | 1.894   | 1.339  | 0.053   | 20  |         |       | Byzova 1973                                |                |
| II | 338.Isopoda      | Armadillidae   | Armadillidium pallasii   |     | 2.106   | 1.489  | 0.053   | 20  |         |       | Byzova 1973                                |                |
| II | 339.Isopoda      | Armadillidae   | Armadillidium pallasii   |     | 2.908   | 2.056  | 0.024   | 20  |         |       | Byzova 1973                                |                |
| II | 340.Isopoda      | Armadillidae   | Armadillidium pallasii   |     | 3.615   | 2.556  | 0.0025  | 20  |         |       | Byzova 1973                                |                |
| II | 341.Isopoda      | Armadillidae   | Armadillidium pallasii   |     | 4.400   | 3.111  | 0.0009  | 20  |         |       | Byzova 1973                                |                |
| II | 342.Isopoda      | Armadillidae   | Armadillidium vulgare    | MIN | 0.7863  | 0.556  | 0.144   | 20  |         |       | Byzova 1973 (data of Reichle 1968)         |                |
| II | 343.Isopoda      | Armadillidae   | Armadillidium vulgare    |     | 1.1469  | 0.811  | 0.065   | 20  |         |       | Byzova 1973 (data of Edney 1964)           |                |
| II | 344.Isopoda      | Armadillidae   | Armadillidium vulgare    |     | 1.4142  | 1.000  | 0.12    | 20  |         |       | Byzova 1973 (data of Reichle 1968)         |                |
| II | 345.Isopoda      | Armadillidae   | Armadillidium vulgare    |     | 4.0857  | 2.889  | 0.004   | 20  |         |       | Byzova 1973 (data of Engelmann 1961)       |                |
| II | 346.Isopoda      | Armadillidae   | Armadillidium vulgare    |     | 11.2345 | 7.944  | 0.00064 | 20  |         |       | Byzova 1973 (data of Edney & Spencer 1956) |                |
| II | 347.Isopoda      | Asellidae      | Asellus aquaticus        | MIN | 3.1     | 1.11   | 0.0168  | 10  |         |       | Simčič & Brancelj 2006                     |                |
| II | 348.Amphipoda    | Pontoporeiidae | Bathyporeia pelgica      | MIN | 0.0062  | 0.0044 | 0.0022  | 20  |         |       | Fish & Preece 1970                         |                |
| II | 349.Amphipoda    | Pontoporeiidae | Bathyporeia pelgica      |     | 6.7908  | 4.8018 | 0.00222 | 20  |         |       | Fish & Preece 1970                         |                |



|    |      |           |                |                            |        |         |         |         |      |         |        |      |  |  |  |  |  |                         |
|----|------|-----------|----------------|----------------------------|--------|---------|---------|---------|------|---------|--------|------|--|--|--|--|--|-------------------------|
| II | 350. | Amphipoda | Pontoporeiidae | Bathyporeia pelgica        | 7.1562 | 5.0602  | 0.00133 | 20      |      |         |        |      |  |  |  |  |  | Fish & Preece 1970      |
| II | 351. | Amphipoda | Pontoporeiidae | Bathyporeia pelgica        | 8.9144 | 6.3034  | 0.00089 | 20      |      |         |        |      |  |  |  |  |  | Fish & Preece 1970      |
| II | 352. | Amphipoda | Pontoporeiidae | Bathyporeia pilosa         | MIN    | 0.0057  | 0.004   | 0.00219 | 20   |         |        |      |  |  |  |  |  | Fish & Preece 1970      |
| II | 353. | Amphipoda | Pontoporeiidae | Bathyporeia pilosa         |        | 3.2202  | 2.2770  | 0.00444 | 20   |         |        |      |  |  |  |  |  | Fish & Preece 1970      |
| II | 354. | Amphipoda | Pontoporeiidae | Bathyporeia pilosa         |        | 6.7908  | 4.8018  | 0.00222 | 20   |         |        |      |  |  |  |  |  | Fish & Preece 1970      |
| II | 355. | Amphipoda | Pontoporeiidae | Bathyporeia pilosa         |        | 8.9531  | 6.3308  | 0.00133 | 20   |         |        |      |  |  |  |  |  | Fish & Preece 1970      |
| II | 356. | Amphipoda | Pontoporeiidae | Bathyporeia pilosa         |        | 10.6940 | 7.5618  | 0.00089 | 20   |         |        |      |  |  |  |  |  | Fish & Preece 1970      |
| II | 357. | Mysidacea | Mysidae        | Boreomysis californica     | MIN    | 0.3323  | 0.086   | 0.035   | 5.5  | 0.0061  | 0.079  | 82.6 |  |  |  |  |  | Childress 1975          |
| II | 358. | Mysidacea | Mysidae        | Boreomysis californica     |        | 1.2519  | 0.324   | 0.035   | 5.5  | 0.0061  | 0.079  | 82.6 |  |  |  |  |  | Childress 1975          |
| II | 359. | Amphipoda | Eusiridae      | Bovallia gigantea          | MIN    | 2.9346  | 0.556   | 0.528   | 1    | 0.104   |        | 80   |  |  |  |  |  | Opalinski 1991          |
| II | 360. | Amphipoda | Lycaeidae      | Brachyscelus latipes       | MIN    | 15.2837 | 20.167  | 0.00128 | 29   | 0.00019 |        | 85.2 |  |  |  |  |  | Ikeda 1970              |
| II | 361. | Amphipoda | Ampeliscidae   | Byblis securiger           | MIN    | 4.5792  | 0.956   | 0.239   | 2.4  | 0.067   |        | 72   |  |  |  |  |  | Opalinski 1991          |
| II | 362. | Isopoda   | Cylisticidae   | Cylisticus convexus        | MIN    | 1.8574  | 1.3134  | 0.0384  | 20   |         |        |      |  |  |  |  |  | Reiche 1968             |
| II | 363. | Amphipoda | Cyphocarididae | Cyphocaris richardi        | MIN    | 1.3526  | 0.217   | 1.062   | -1.4 | 0.287   |        | 73   |  |  |  |  |  | Opalinski 1991          |
| II | 364. | Amphipoda | Cyphocarididae | Cyphocaris sp              | MIN    | 1.7351  | 0.311   | 0.32    | 0.2  | 0.08142 | 0.070  | 74.9 |  |  |  |  |  | Ikeda 1988              |
| II | 365. | Cumacea   | Diastylidae    | Diastylis sp.              | MIN    | 5.0004  | 2.872   | 0.0006  | 17   | 0.00018 |        | 70   |  |  |  |  |  | Ikeda 1970              |
| II | 366. | Amphipoda | Gammaridae     | Dikerogammarus haemobaphes | MIN    | 4.5123  | 3.1907  | 0.008   | 20   |         |        |      |  |  |  |  |  | Kititsina 1980          |
| II | 367. | Amphipoda | Eusiridae      | Djerboa ficipes            | MIN    | 2.3872  | 0.422   | 0.1     | 0    |         |        | 80   |  |  |  |  |  | Opalinski 1991          |
| II | 368. | Amphipoda | Eurycopidae    | Eurymera monticulosa       | MIN    | 3.3991  | 0.644   | 0.235   | 1    | 0.042   |        | 82.2 |  |  |  |  |  | Opalinski 1991          |
| II | 369. | Amphipoda | Eurycopidae    | Eurythenes gryllus         | MIN    | 3.0678  | 0.506   | 0.95    | -1   | 0.173   |        | 81.8 |  |  |  |  |  | Opalinski 1991          |
| II | 370. | Amphipoda | Eusiridae      | Eusirus perdentatus        | MIN    | 0.8064  | 0.133   | 1.628   | -1   | 0.344   |        | 79   |  |  |  |  |  | Opalinski 1991          |
| II | 371. | Amphipoda | Hyperiididae   | Euthemisto compressa       | MIN    | 3.3     | 0.77    | 0.022   | 4    | 0.00435 |        | 780  |  |  |  |  |  | Conover 1960            |
| II | 372. | Amphipoda | Hyperiididae   | Euthemisto compressa       |        | 3.6     | 0.83    | 0.024   | 4    | 0.00487 |        | 780  |  |  |  |  |  | Conover 1960            |
| II | 373. | Amphipoda | Hyperiididae   | Euthemisto compressa       |        | 3.7     | 0.86    | 0.025   | 4    | 0.00497 |        | 780  |  |  |  |  |  | Conover 1960            |
| II | 374. | Amphipoda | Hyperiididae   | Euthemisto libellula       | MIN    | 4.7     | 0.83    | 0.017   | -0.1 | 0.00298 | 0.0805 | 82.4 |  |  |  |  |  | Ikeda & Skjoldal 1989   |
| II | 375. | Amphipoda | Hyperiididae   | Euthemisto libellula       |        | 4.7239  | 1.244   | 0.00791 | 5.75 | 0.00153 |        | 80.7 |  |  |  |  |  | Ikeda 1970              |
| II | 376. | Amphipoda | Hyperiididae   | Euthemisto libellula       |        | 11.0608 | 3.111   | 0.00455 | 6.7  | 0.0008  |        | 82.5 |  |  |  |  |  | Ikeda 1970              |
| II | 377. | Amphipoda | Gammaridae     | Gammarus duebeni           | MIN    | 3.1113  | 1.1     | 0.05    | 10   |         |        |      |  |  |  |  |  | Bulnheim 1979           |
| II | 378. | Amphipoda | Gammaridae     | Gammarus fossarum          | MIN    | 2.0     | 0.722   | 0.0189  | 10   |         |        |      |  |  |  |  |  | Simčič & Brancelj 2006  |
| II | 379. | Amphipoda | Gammaridae     | Gammarus locusta           | MIN    | 2.3220  | 1.6419  | 0.015   | 20   | 0.00349 |        | 77.4 |  |  |  |  |  | Ivlev & Sutschenya 1961 |
| II | 380. | Amphipoda | Gammaridae     | Gammarus locusta           |        | 2.6286  | 1.8587  | 0.015   | 20   | 0.00349 |        | 77.4 |  |  |  |  |  | Ivlev & Sutschenya 1961 |
| II | 381. | Amphipoda | Gammaridae     | Gammarus locusta           |        | 4.8000  | 2.4     | 0.05    | 15   |         |        |      |  |  |  |  |  | Bulnheim 1979           |
| II | 382. | Amphipoda | Gammaridae     | Gammarus oceanicus         | MIN    | 2.8000  | 1.4     | 0.05    | 15   |         |        |      |  |  |  |  |  | Bulnheim 1979           |
| II | 383. | Amphipoda | Gammaridae     | Gammarus salinus           | MIN    | 3.3941  | 1.2     | 0.05    | 10   |         |        |      |  |  |  |  |  | Bulnheim 1979           |
| II | 384. | Amphipoda | Gammaridae     | Gammarus zaddachi          | MIN    | 3.1113  | 1.1     | 0.05    | 10   |         |        |      |  |  |  |  |  | Bulnheim 1979           |
| II | 385. | Isopoda   | Chaetiliidae   | Glyptonotus antarcticus    | MIN    | 0.3224  | 0.057   | 33      | 0    |         |        |      |  |  |  |  |  | Robertson et al. 2003   |
| II | 386. | Mysidacea | Lophogastridae | Gnathophausia gigas        | MIN    | 0.3440  | 0.086   | 1.01    | 5    |         |        |      |  |  |  |  |  | Cowles et al. 1991      |
| II | 387. | Mysidacea | Lophogastridae | Gnathophausia gigas        |        | 0.4459  | 0.104   | 1.052   | 4    | 0.193   | 0.071  | 79.5 |  |  |  |  |  | Childress 1975          |
| II | 388. | Mysidacea | Lophogastridae | Gnathophausia gigas        |        | 0.7811  | 0.14    | 0.77    | 0.2  | 0.12729 | 0.073  | 83.4 |  |  |  |  |  | Ikeda 1988              |
| II | 389. | Mysidacea | Lophogastridae | Gnathophausia gigas        |        | 4.8444  | 1.13    | 1.052   | 4    | 0.193   | 0.071  | 79.5 |  |  |  |  |  | Childress 1975          |
| II | 390. | Mysidacea | Lophogastridae | Gnathophausia gracilis     | MIN    | 0.2658  | 0.062   | 2.05    | 4    | 0.38    | 0.070  | 81.6 |  |  |  |  |  | Childress 1975          |
| II | 391. | Mysidacea | Lophogastridae | Gnathophausia gracilis     |        | 0.4520  | 0.113   | 2.45    | 5    |         |        |      |  |  |  |  |  | Cowles et al. 1991      |
| II | 392. | Mysidacea | Lophogastridae | Gnathophausia gracilis     |        | 1.8092  | 0.422   | 2.05    | 4    | 0.38    | 0.070  | 81.6 |  |  |  |  |  | Childress 1975          |
| II | 393. | Mysidacea | Lophogastridae | Gnathophausia ingens       | MIN    | 0.0810  | 0.0189  | 52.42   | 4    | 4.875   | 0.054  | 0.91 |  |  |  |  |  | Childress 1975          |
| II | 394. | Mysidacea | Lophogastridae | Gnathophausia ingens       |        | 0.3593  | 0.093   | 5.542   | 5.5  | 1.514   | 0.063  | 72.6 |  |  |  |  |  | Childress 1975          |
| II | 395. | Mysidacea | Lophogastridae | Gnathophausia ingens       |        | 0.5374  | 0.19    | 5.11    | 10   |         |        |      |  |  |  |  |  | Cowles et al. 1991      |
| II | 396. | Mysidacea | Lophogastridae | Gnathophausia ingens       |        | 1.0800  | 0.27    | 5.11    | 5    |         |        |      |  |  |  |  |  | Cowles et al. 1991      |
| II | 397. | Mysidacea | Lophogastridae | Gnathophausia ingens       |        | 3.2417  | 0.839   | 5.542   | 5.5  | 1.514   | 0.063  | 72.6 |  |  |  |  |  | Childress 1975          |
| II | 398. | Mysidacea | Lophogastridae | Gnathophausia zoea         | MIN    | 0.3111  | 0.11    | 3.99    | 10   |         |        |      |  |  |  |  |  | Cowles et al. 1991      |
| II | 399. | Mysidacea | Lophogastridae | Gnathophausia zoea         |        | 0.3593  | 0.093   | 5.2     | 5.5  |         |        |      |  |  |  |  |  | Childress 1975          |
| II | 400. | Mysidacea | Lophogastridae | Gnathophausia zoea         |        | 0.4675  | 0.121   | 5.2     | 5.5  |         |        |      |  |  |  |  |  | Childress 1975          |
| II | 401. | Mysidacea | Lophogastridae | Gnathophausia zoea         |        | 0.8000  | 0.20    | 3.99    | 5    |         |        |      |  |  |  |  |  | Cowles et al. 1991      |

|    |                |                |                            |     |         |        |          |      |          |       |                                                |            |
|----|----------------|----------------|----------------------------|-----|---------|--------|----------|------|----------|-------|------------------------------------------------|------------|
| II | 402. Amphipoda | Eusiridae      | Gondogeneia antarctica     | MIN | 10.5561 | 2.000  | 0.029    | 1    | 0.005    | 83    | Opalinski 1991                                 |            |
| II | 403. Isopoda   | Hemioniscidae  | Hemilepistus elegans       | MIN | 0.7382  | 0.522  | 0.275    | 20   |          |       | Byzova 1973                                    |            |
| II | 404. Isopoda   | Hemioniscidae  | Hemilepistus elegans       |     | 1.5316  | 1.083  | 0.115    | 20   |          |       | Byzova 1973                                    |            |
| II | 405. Mysidacea | Mysidae        | Hypererythrops sp.         | MIN | 7.5929  | 4.361  | 0.00111  | 17   | 0.000542 | 52.2  | Ikeda 1970                                     |            |
| II | 406. Amphipoda | Lanceolidae    | Hyperia galba              | MIN | 0.88    | 0.23   | 0.0824   | 5.6  | 0.00824  | ?     | Conover 1960                                   |            |
| II | 407. Amphipoda | Lanceolidae    | Hyperia galba              |     | 0.99    | 0.26   | 0.01015  | 5.6  | 0.001015 | ?     | Conover 1960                                   |            |
| II | 408. Amphipoda | Lanceolidae    | Hyperia galba              |     | 1.2021  | 0.425  | 0.0357   | 10   | 0.0041   | 0.067 | 88.5 Childress 1975                            |            |
| II | 409. Amphipoda | Lanceolidae    | Hyperia galba              |     | 1.2444  | 0.383  | 0.2527   | 8    | 0.0286   |       | 88.7 Ikeda 1970                                |            |
| II | 410. Amphipoda | Lanceolidae    | Hyperia galba              |     | 1.30    | 0.34   | 0.0352   | 5.6  | 0.00352  | ?     | Conover 1960                                   |            |
| II | 411. Amphipoda | Lanceolidae    | Hyperia galba              |     | 1.34    | 0.35   | 0.0462   | 5.6  | 0.00462  | ?     | Conover 1960                                   |            |
| II | 412. Amphipoda | Lanceolidae    | Hyperia galba              |     | 2.0641  | 0.850  | 0.0497   | 12.2 | 0.00616  |       | 87.6 Ikeda 1970                                |            |
| II | 413. Amphipoda | Lanceolidae    | Hyperia galba              |     | 2.2458  | 0.794  | 0.0357   | 10   | 0.0041   | 0.067 | 88.5 Childress 1975                            |            |
| II | 414. Amphipoda | Lanceolidae    | Hyperia gaudichaudii       | MIN | 1.4351  | 0.24   | 0.525    | -0.8 | 0.10530  | 0.071 | ?                                              | Ikeda 1988 |
| II | 415. Amphipoda | Lanceolidae    | Hyperia sp.                | MIN | 2.9047  | 0.817  | 0.00927  | 6.7  | 1.2      |       | 87.1 Ikeda 1970                                |            |
| II | 416. Amphipoda | Lanceolidae    | Hyperia sp.                |     | 5.3104  | 3.050  | 0.00131  | 17   | 0.00019  |       | 85.5 Ikeda 1970                                |            |
| II | 417. Amphipoda | Lanceolidae    | Hyperia sp.                |     | 6.7903  | 3.900  | 0.000428 | 17   | 0.000072 |       | 83.2 Ikeda 1970                                |            |
| II | 418. Amphipoda | Hyperlopsidae  | Hyperiella antarctica      | MIN | 1.2496  | 0.8836 | 0.02     | 20   |          |       | Opalinski 1991                                 |            |
| II | 419. Isopoda   | Idoteidae      | Idotea baltica basteri     | MIN | 2.1     | 1.45   | 0.1385   | 20   |          |       | Khmeleva 1973                                  |            |
| II | 420. Cumacea   | Bodotriidae    | Iphinoe sp.                | MIN | 0.7579  | 1.000  | 0.00664  | 29   | 0.00109  |       | 83.6 Ikeda 1970                                |            |
| II | 421. Cumacea   | Bodotriidae    | Iphinoe sp.                |     | 2.1998  | 3.111  | 0.00062  | 30   | 0.0001   |       | 83.9 Ikeda 1970                                |            |
| II | 422. Isopoda   | Ligiidae       | Ligia oceanica             | MIN | 1.2572  | 0.889  | 0.8      | 20   |          |       | Byzova 1973 (data of Edney & Spencer 1955)     |            |
| II | 423. Isopoda   | Ligiidae       | Ligia oceanica             |     | 1.3350  | 0.944  | 0.8      | 20   |          |       | Byzova 1973 (data of Ellenby 1951)             |            |
| II | 424. Isopoda   | Ligiidae       | Ligidium japonica          | MIN | 1.8074  | 1.278  | 0.025    | 20   |          |       | Byzova 1973 (data of Saito 1965)               |            |
| II | 425. Isopoda   | Ligiidae       | Ligidium japonica          |     | 3.1424  | 2.222  | 0.0045   | 20   |          |       | Byzova 1973 (data of Saito 1965)               |            |
| II | 426. Isopoda   | Oniscidae      | Mesidothea entomon         | MIN | 1.2885  | 0.9111 | 10       | 20   |          |       | Romanova & Khmeleva 1978                       |            |
| II | 427. Isopoda   | Oniscidae      | Mesidothea entomon         |     | 1.4503  | 1.0255 | 5        | 20   |          |       | Romanova & Khmeleva 1978                       |            |
| II | 428. Isopoda   | Oniscidae      | Mesidothea entomon         |     | 1.6190  | 1.1448 | 3.2      | 20   |          |       | Romanova & Khmeleva 1978                       |            |
| II | 429. Isopoda   | Oniscidae      | Mesidothea entomon         |     | 1.6859  | 1.1921 | 2        | 20   |          |       | Romanova & Khmeleva 1978                       |            |
| II | 430. Isopoda   | Oniscidae      | Mesidothea entomon         |     | 2.1579  | 1.5259 | 0.5      | 20   |          |       | Romanova & Khmeleva 1978                       |            |
| II | 431. Mysidacea | Mysidae        | Mesopodopsis slabberi      | MIN | 1.4500  | 1.0253 | 0.0325   | 20   |          |       | Braginski 1957                                 |            |
| II | 432. Mysidacea | Mysidae        | Mysis relicta              | MIN | 3.2052  | 2.2664 | 0.01     | 20   |          |       | Foulds & Roff 1976                             |            |
| II | 433. Mysidacea | Lophogastridae | Neomysis awatschensis      | MIN | 2.0290  | 1.4347 | 0.0235   | 20   |          |       | Jawed 1973                                     |            |
| II | 434. Mysidacea | Lophogastridae | Neomysis awatschensis      |     | 2.1807  | 1.5420 | 0.0195   | 20   |          |       | Jawed 1973                                     |            |
| II | 435. Mysidacea | Lophogastridae | Neomysis awatschensis      |     | 2.3507  | 1.6622 | 0.0162   | 20   |          |       | Jawed 1973                                     |            |
| II | 436. Mysidacea | Lophogastridae | Neomysis awatschensis      |     | 2.4176  | 1.7095 | 0.0148   | 20   |          |       | Jawed 1973                                     |            |
| II | 437. Mysidacea | Lophogastridae | Neomysis awatschensis      |     | 2.4910  | 1.7614 | 0.0136   | 20   |          |       | Jawed 1973                                     |            |
| II | 438. Mysidacea | Lophogastridae | Neomysis awatschensis      |     | 2.7249  | 1.9268 | 0.01086  | 20   |          |       | Jawed 1973                                     |            |
| II | 439. Mysidacea | Lophogastridae | Neomysis awatschensis      |     | 2.9786  | 2.1062 | 0.00855  | 20   |          |       | Jawed 1973                                     |            |
| II | 440. Mysidacea | Lophogastridae | Neomysis awatschensis      |     | 3.5358  | 2.5002 | 0.00543  | 20   |          |       | Jawed 1973                                     |            |
| II | 441. Mysidacea | Lophogastridae | Neomysis awatschensis      |     | 4.2360  | 2.9953 | 0.00339  | 20   |          |       | Jawed 1973                                     |            |
| II | 442. Mysidacea | Lophogastridae | Neomysis awatschensis      |     | 4.6741  | 3.3051 | 0.00258  | 20   |          |       | Jawed 1973                                     |            |
| II | 443. Mysidacea | Lophogastridae | Neomysis mirabilis         | MIN | 5.4931  | 3.8842 | 0.0118   | 20   |          |       | Kuzmicheva & Kukina 1974                       |            |
| II | 444. Mysidacea | Lophogastridae | Neomysis mirabilis         |     | 5.6948  | 4.0268 | 0.0118   | 20   |          |       | Kuzmicheva & Kukina 1974                       |            |
| II | 445. Mysidacea | Lophogastridae | Neomysis mirabilis         |     | 6.5317  | 4.6186 | 0.0118   | 20   |          |       | Klyashtorin & Kuzmicheva 1975                  |            |
| II | 446. Amphipoda | Niphargidae    | Niphargus krameri          | MIN | 1.10    | 0.39   | 0.0149   | 10   |          |       | Simčič et al. 2005                             |            |
| II | 447. Amphipoda | Niphargidae    | Niphargus rhenorhodanensis | MIN | 1.2     | 0.44   | 0.013    | 11   |          |       | Hervant et al. 1997                            |            |
| II | 448. Amphipoda | Niphargidae    | Niphargus sphagnicolus     | MIN | 4.2     | 1.5    | 0.0059   | 10   |          |       | Simčič & Brancelj 2006                         |            |
| II | 449. Amphipoda | Niphargidae    | Niphargus stygius          | MIN | 0.93    | 0.33   | 0.0304   | 10   |          |       | Simčič et al. 2005                             |            |
| II | 450. Amphipoda | Niphargidae    | Niphargus virei            | MIN | 0.45    | 0.17   | 0.093    | 11   |          |       | Hervant et al. 1997                            |            |
| II | 451. Isopoda   | Oniscidae      | Oniscus asellus            | MIN | 0.9433  | 0.667  | 0.15     | 20   |          |       | Byzova 1973 (data of Phillipson & Watson 1965) |            |
| II | 452. Isopoda   | Oniscidae      | Oniscus asellus            |     | 1.5712  | 1.111  | 0.1      | 20   |          |       | Byzova 1973 (data of Phillipson & Watson 1965) |            |
| II | 453. Isopoda   | Oniscidae      | Oniscus asellus            |     | 2.3575  | 1.667  | 0.02     | 20   |          |       | Byzova 1973 (data of Phillipson & Watson 1965) |            |

|    |               |                 |                           |     |         |        |         |       |         |       |  |      |                                                |
|----|---------------|-----------------|---------------------------|-----|---------|--------|---------|-------|---------|-------|--|------|------------------------------------------------|
| II | 454.Isopoda   | Oniscidae       | Oniscus asellus           |     | 2.8284  | 2.000  | 0.06    | 20    |         |       |  |      | Byzova 1973 (data of Phillipson & Watson 1965) |
| II | 455.Isopoda   | Oniscidae       | Oniscus asellus           |     | 3.1424  | 2.222  | 0.018   | 20    |         |       |  |      | Byzova 1973 (data of Edney & Spencer 1955)     |
| II | 456.Isopoda   | Oniscidae       | Oniscus asellus           |     | 6.6001  | 4.667  | 0.01    | 20    |         |       |  |      | Byzova 1973 (data of Will 1952)                |
| II | 457.Isopoda   | Oniscidae       | Oniscus asellus           |     | 7.0711  | 5.000  | 0.0061  | 20    |         |       |  |      | Byzova 1973 (data of Edwards 1946)             |
| II | 458.Isopoda   | Oniscidae       | Oniscus asellus           |     | 12.2570 | 8.667  | 0.0018  | 20    |         |       |  |      | Byzova 1973 (data of Morrison 1946)            |
| II | 459.Amphipoda | Talitridae      | Orchestia bottae          | MIN | 0.9977  | 0.7055 | 0.11    | 20    | 0.0245  |       |  | 77.1 | Ivlev & Sutschenya 1961                        |
| II | 460.Amphipoda | Talitridae      | Orchestia bottae          |     | 2.8593  | 2.0218 | 0.11    | 20    | 0.0245  |       |  | 77.1 | Ivlev & Sutschenya 1961                        |
| II | 461.Amphipoda | Lysianassidae   | Orchomene sp.             | MIN | 15.7189 | 22.000 | 0.00362 | 29.85 | 0.00091 |       |  | 75   | Ikeda 1970                                     |
| II | 462.Amphipoda | Lysianassidae   | Orchomenella chilensis    | MIN | 3.6430  | 0.644  | 0.05    | 0     |         |       |  |      | Opalinski 1991                                 |
| II | 463.Amphipoda | Lysianassidae   | Orchomenella plebs        | MIN | 1.7593  | 0.311  | 0.161   | 0     | 0.032   |       |  | 80.2 | Opalinski 1991                                 |
| II | 464.Amphipoda | Lysianassidae   | Orchomenella plebs        |     | 1.9634  | 0.372  | 0.105   | 1     | 0.021   |       |  | 80   | Opalinski 1991                                 |
| II | 465.Amphipoda | Lysianassidae   | Orchomenella plebs        |     | 2.3840  | 0.372  | 0.194   | -1.8  | 0.039   |       |  | 80   | Opalinski 1991                                 |
| II | 466.Amphipoda | Lysianassidae   | Orchomenella plebs        |     | 2.3888  | 0.394  | 0.148   | -1    | 0.03    |       |  | 80   | Opalinski 1991                                 |
| II | 467.Amphipoda | Lysianassidae   | Orchomenella plebs        |     | 2.4929  | 0.389  | 0.091   | -1.8  | 0.023   |       |  | 75   | Opalinski 1991                                 |
| II | 468.Amphipoda | Lysianassidae   | Orchomenella plebs        |     | 2.6543  | 0.539  | 0.072   | 2     | 0.014   |       |  | 80.6 | Opalinski 1991                                 |
| II | 469.Amphipoda | Lysianassidae   | Orchomenella plebs        |     | 3.1658  | 0.494  | 0.097   | -1.8  |         |       |  |      | Opalinski 1991                                 |
| II | 470.Amphipoda | Lysianassidae   | Orchomenella plebs        |     | 3.2748  | 0.511  | 0.088   | -1.8  | 0.029   |       |  | 67   | Opalinski 1991                                 |
| II | 471.Amphipoda | Lysianassidae   | Orchomenella plebs        |     | 3.3837  | 0.528  | 0.073   | -1.8  | 0.019   |       |  | 74   | Opalinski 1991                                 |
| II | 472.Amphipoda | Lysianassidae   | Orchomenella sp.          | MIN | 3.0981  | 0.511  | 0.206   | -1    | 0.041   |       |  | 80   | Opalinski 1991                                 |
| II | 473.Amphipoda | Calliopiidae    | Paracallisoma coecus      | MIN | 0.7727  | 0.2    | 0.2     | 5.5   | 0.063   | 0.045 |  | 68.2 | Childress 1975                                 |
| II | 474.Amphipoda | Calliopiidae    | Paracallisoma coecus      |     | 1.1205  | 0.29   | 0.2     | 5.5   | 0.063   | 0.045 |  | 68.2 | Childress 1975                                 |
| II | 475.Amphipoda | Potogeneiidae   | Paramoera walkeri         | MIN | 1.3180  | 0.233  | 0.044   | 0     | 0.009   |       |  | 79.6 | Opalinski 1991                                 |
| II | 476.Amphipoda | Potogeneiidae   | Paramoera walkeri         |     | 1.7940  | 0.278  | 0.02    | -1.9  | 0.004   |       |  | 80   | Opalinski 1991                                 |
| II | 477.Amphipoda | Potogeneiidae   | Paramoera walkeri         |     | 1.8554  | 0.328  | 0.044   | 0     | 0.009   |       |  | 79.6 | Opalinski 1991                                 |
| II | 478.Amphipoda | Potogeneiidae   | Paramoera walkeri         |     | 2.1383  | 0.378  | 0.044   | 0     | 0.009   |       |  | 79.6 | Opalinski 1991                                 |
| II | 479.Amphipoda | Potogeneiidae   | Paramoera walkeri         |     | 2.2627  | 0.400  | 0.02    | 0     | 0.005   |       |  | 75   | Opalinski 1991                                 |
| II | 480.Amphipoda | Potogeneiidae   | Paramoera walkeri         |     | 2.3215  | 0.478  | 0.028   | 2.2   | 0.006   |       |  | 79   | Opalinski 1991                                 |
| II | 481.Amphipoda | Potogeneiidae   | Paramoera walkeri         |     | 2.7381  | 0.556  | 0.02    | 2     | 0.005   |       |  | 75   | Opalinski 1991                                 |
| II | 482.Amphipoda | Potogeneiidae   | Paramoera walkeri         |     | 3.0369  | 0.494  | 0.021   | -1.2  | 0.004   |       |  | 80   | Opalinski 1991                                 |
| II | 483.Mysidacea | Mysidae         | Paramysis kessleri        | MIN | 2.3272  | 1.6456 | 0.03    | 20    |         |       |  |      | Braginski 1957                                 |
| II | 484.Mysidacea | Mysidae         | Paramysis kessleri        |     | 3.9899  | 2.8213 | 0.0515  | 20    |         |       |  |      | Braginski 1957                                 |
| II | 485.Amphipoda | Paraphronimidae | Parandania boeckii        | MIN | 1.9424  | 0.389  | 0.395   | 1.8   | 0.076   |       |  | 80.8 | Opalinski 1991                                 |
| II | 486.Amphipoda | Paraphronimidae | Parathemisto gaudichaudii | MIN | 2.6677  | 0.44   | 0.07    | -1    | 0.01312 | 0.074 |  | ?80  | Ikeda 1988                                     |
| II | 487.Amphipoda | Paraphronimidae | Parathemisto gaudichaudii |     | 4.4248  | 0.74   | 0.02    | -0.8  | 0.00360 | 0.086 |  | ?80  | Ikeda 1988                                     |
| II | 488.Amphipoda | Phronimidae     | Phronima sedentaria       | MIN | 0.2036  | 0.072  | 0.086   | 10    | 0.0637  | 0.057 |  | 92.6 | Childress 1975                                 |
| II | 489.Amphipoda | Phronimidae     | Phronima sedentaria       |     | 0.9588  | 0.339  | 0.086   | 10    | 0.0637  | 0.057 |  | 92.6 | Childress 1975                                 |
| II | 490.Amphipoda | Phronimidae     | Phronima sp.              | MIN | 1.1351  | 1.472  | 0.145   | 28.75 | 8.17    |       |  | 94.4 | Ikeda 1970                                     |
| II | 491.Amphipoda | Pontogeneiidae  | Pontogeneia antarctica    | MIN | 10.9132 | 1.800  | 0.005   | -1    | 0.001   |       |  | 80   | Opalinski 1991                                 |
| II | 492.Isopoda   | Porcellionidae  | Porcellio laevis          | MIN | 0.7071  | 0.500  | 0.18    | 20    |         |       |  |      | Byzova 1973 (data of Edney 1964)               |
| II | 493.Isopoda   | Porcellionidae  | Porcellio laevis          |     | 1.5712  | 1.111  | 0.012   | 20    |         |       |  |      | Byzova 1973 (data of Edney 1964)               |
| II | 494.Isopoda   | Porcellionidae  | Porcellio scaber          | MIN | 0.9433  | 0.667  | 0.06    | 20    |         |       |  |      | Byzova 1973 (data of Edney & Spencer 1955)     |
| II | 495.Isopoda   | Porcellionidae  | Porcellio scaber          |     | 1.5712  | 1.111  | 0.1     | 20    |         |       |  |      | Byzova 1973 (data of Wieser 1963, 1965)        |
| II | 496.Isopoda   | Porcellionidae  | Porcellio scaber          |     | 1.8851  | 1.333  | 0.25    | 20    |         |       |  |      | Byzova 1973 (data of Edney 1964)               |
| II | 497.Isopoda   | Porcellionidae  | Porcellio scaber          |     | 3.1424  | 2.222  | 0.007   | 20    |         |       |  |      | Byzova 1973 (data of Will 1952)                |
| II | 498.Isopoda   | Serolidae       | Serolis cornuta           | MIN | 0.3076  | 0.049  | 2.775   | -1.5  |         |       |  |      | Luxmoore 1984                                  |
| II | 499.Isopoda   | Serolidae       | Serolis cornuta           |     | 0.3224  | 0.057  | 2.59    | 0     |         |       |  |      | Luxmoore 1984                                  |
| II | 500.Isopoda   | Serolidae       | Serolis cornuta           |     | 0.4181  | 0.082  | 1.64    | 1.5   |         |       |  |      | Luxmoore 1984                                  |
| II | 501.Isopoda   | Serolidae       | Serolis cornuta           |     | 0.4870  | 0.106  | 1.4     | 3     |         |       |  |      | Luxmoore 1984                                  |
| II | 502.Isopoda   | Serolidae       | Serolis cornuta           |     | 1.7261  | 0.275  | 2.775   | -1.5  | 0.555   |       |  | 80   | Opalinski 1991                                 |
| II | 503.Isopoda   | Serolidae       | Serolis cornuta           |     | 1.8215  | 0.322  | 2.59    | 0     | 0.518   |       |  | 80   | Opalinski 1991                                 |
| II | 504.Isopoda   | Serolidae       | Serolis cornuta           |     | 2.3554  | 0.462  | 1.64    | 1.5   | 0.328   |       |  | 80.5 | Opalinski 1991                                 |
| II | 505.Isopoda   | Serolidae       | Serolis cornuta           |     | 2.7293  | 0.594  | 1.4     | 3     | 0.28    |       |  | 80   | Opalinski 1991                                 |

|     |               |                |                            |     |         |        |          |      |         |       |      |                                             |
|-----|---------------|----------------|----------------------------|-----|---------|--------|----------|------|---------|-------|------|---------------------------------------------|
| II  | 506.Isopoda   | Serolidae      | Serolis polita             | MIN | 0.4205  | 0.067  | 0.345    | -1.5 | 0.069   |       | 80   | Opalinski 1991                              |
| II  | 507.Isopoda   | Serolidae      | Serolis polita             |     | 0.4503  | 0.098  | 0.35     | 3    | 0.07    |       | 80   | Opalinski 1991                              |
| II  | 508.Isopoda   | Serolidae      | Serolis polita             |     | 0.4639  | 0.082  | 0.305    | 0    | 0.061   |       | 80   | Opalinski 1991                              |
| II  | 509.Isopoda   | Serolidae      | Serolis polita             |     | 0.4792  | 0.094  | 0.3      | 1.5  | 0.06    |       | 80   | Opalinski 1991                              |
| II  | 510.Isopoda   | Asellidae      | Stenasellus virei          | MIN | 0.82    | 0.31   | 0.012    | 11   |         |       |      | Hervant et al. 1997                         |
| II  | 511.Amphipoda | Synopiidae     | Synopia ultramarina        | MIN | 80.5855 | 115.6  | 0.0007   | 30.2 | 0.00009 |       | 87.1 | Ikeda 1970                                  |
| II  | 512.Amphipoda | Talitridae     | Talitrus sylvaticus        | MIN | 0.7780  | 0.778  | 0.05     | 25   |         |       |      | Byzova 1973 (data of Clark 1955)            |
| II  | 513.Amphipoda | Talitridae     | Talitrus sylvaticus        |     | 1.0720  | 1.072  | 0.021    | 25   |         |       |      | Byzova 1973 (data of Clark 1955)            |
| II  | 514.Amphipoda | Talitridae     | Talitrus sylvaticus        |     | 1.3890  | 1.389  | 0.0085   | 25   |         |       |      | Byzova 1973 (data of Clark 1955)            |
| II  | 515.Amphipoda | Talitridae     | Talitrus sylvaticus        |     | 2.5000  | 2.500  | 0.0015   | 25   |         |       |      | Byzova 1973 (data of Clark 1955)            |
| II  | 516.Amphipoda | Talitridae     | Talorchestia megalophtalma | MIN | 0.9977  | 0.839  | 0.388    | 22.5 |         |       |      | Byzova 1973 (data of Edwards & Irving 1943) |
| II  | 517.Amphipoda | Talitridae     | Talorchestia megalophtalma |     | 1.1428  | 0.961  | 0.291    | 22.5 |         |       |      | Byzova 1973 (data of Edwards & Irving 1943) |
| II  | 518.Amphipoda | Talitridae     | Talorchestia megalophtalma |     | 1.3081  | 1.100  | 0.23     | 22.5 |         |       |      | Byzova 1973 (data of Edwards & Irving 1943) |
| II  | 519.Amphipoda | Talitridae     | Talorchestia megalophtalma |     | 1.3545  | 1.139  | 0.278    | 22.5 |         |       |      | Byzova 1973 (data of Edwards & Irving 1943) |
| II  | 520.Amphipoda | Talitridae     | Talorchestia megalophtalma |     | 1.4663  | 1.233  | 0.225    | 22.5 |         |       |      | Byzova 1973 (data of Edwards & Irving 1943) |
| II  | 521.Amphipoda | Talitridae     | Talorchestia megalophtalma |     | 1.5460  | 1.300  | 0.2      | 22.5 |         |       |      | Byzova 1973 (data of Edwards & Irving 1943) |
| II  | 522.Amphipoda | Talitridae     | Talorchestia megalophtalma |     | 1.7041  | 1.433  | 0.155    | 22.5 |         |       |      | Byzova 1973 (data of Edwards & Irving 1943) |
| II  | 523.Amphipoda | Talitridae     | Talorchestia megalophtalma |     | 1.7446  | 1.467  | 0.19     | 22.5 |         |       |      | Byzova 1973 (data of Edwards & Irving 1943) |
| II  | 524.Amphipoda | Talitridae     | Talorchestia megalophtalma |     | 1.8635  | 1.567  | 0.12     | 22.5 |         |       |      | Byzova 1973 (data of Edwards & Irving 1943) |
| II  | 525.Amphipoda | Talitridae     | Talorchestia megalophtalma |     | 2.2202  | 1.867  | 0.11     | 22.5 |         |       |      | Byzova 1973 (data of Edwards & Irving 1943) |
| II  | 526.Amphipoda | Vibiliidae     | Viblia antarctica          | MIN | 0.6716  | 0.11   | 0.061    | -1.1 | 0.01214 | 0.082 | 780  | Ikeda 1988                                  |
| II  | 527.Amphipoda | Lysianassidae  | Waldeckia obesa            | MIN | 0.8485  | 0.150  | 0.218    | 0    | 0.044   |       | 80   | Opalinski 1991                              |
| II  | 528.Amphipoda | Lysianassidae  | Waldeckia obesa            |     | 0.8498  | 0.161  | 0.238    | 1    | 0.048   |       | 80   | Opalinski 1991                              |
| II  | 529.Amphipoda | Lysianassidae  | Waldeckia obesa            |     | 1.0391  | 0.211  | 0.252    | 2    | 0.05    |       | 80   | Opalinski 1991                              |
| II  | 530.Amphipoda | Lysianassidae  | Waldeckia obesa            |     | 1.3907  | 0.217  | 0.295    | -1.8 | 0.059   |       | 80   | Opalinski 1991                              |
| II  | 531.Amphipoda | Lysianassidae  | Waldeckia obesa            |     | 1.6188  | 0.267  | 0.229    | -1   | 0.046   |       | 80   | Opalinski 1991                              |
| II  | 532.Ostracoda | Halocyprididae | Conchoecia sp.             | MIN | 8.799   | 6.222  | 0.000079 | 20   |         |       |      | Pavlova 1975                                |
| II  | 533.Ostracoda | Cypridinidae   | Cypridina hilgendorffii    | MIN | 9.6244  | 13.611 | 0.00198  | 30   | 0.00035 |       | 82.3 | Ikeda 1970                                  |
| II  | 534.Ostracoda | Cypridinidae   | Gigantocypris agassizii    | MIN | 0.0141  | 0.0033 | 5.7      | 4    | 0.26    | 0.030 | 95.4 | Childress 1975                              |
| II  | 535.Ostracoda | Cypridinidae   | Gigantocypris agassizii    |     | 0.0514  | 0.012  | 5.7      | 4    | 0.26    | 0.030 | 95.4 | Childress 1975                              |
| II  | 536.Ostracoda | Cypridinidae   | Gigantocypris mulleri      | MIN | 0.0909  | 0.015  | 1.84     | -1.0 | 0.13966 | 0.084 | 92.4 | Ikeda 1988                                  |
| II  | 537.Ostracoda | Cypridinidae   | Gigantocypris mulleri      |     | 0.1264  | 0.021  | 0.74     | -0.9 | 0.04797 | 0.082 | 93.5 | Ikeda 1988                                  |
| II  | 538.Ostracoda | Cypridinidae   | Gigantocypris mulleri      |     | 0.1339  | 0.024  | 1.88     | 0.2  | 0.16008 | 0.093 | 91.5 | Ikeda 1988                                  |
| II  | 539.Ostracoda | Cypridinidae   | Gigantocypris mulleri      |     | 0.1953  | 0.035  | 0.81     | 0.2  | 0.05486 | 0.082 | 93.2 | Ikeda 1988                                  |
| II  | 540.Ostracoda | Cypridinidae   | Pyrocypis sp.              | MIN | 8.8388  | 12.500 | 0.00045  | 30   | 0.00008 |       | 82.2 | Ikeda 1970                                  |
| III | 541.Decapoda  | Oplophoridae   | Acanthephyra acutifrons    | MIN | 0.5968  | 0.211  | 8.64     | 10   |         |       |      | Cowles et al. 1991                          |
| III | 542.Decapoda  | Oplophoridae   | Acanthephyra acutifrons    |     | 0.8240  | 0.206  | 8.64     | 5    |         |       |      | Cowles et al. 1991                          |
| III | 543.Decapoda  | Oplophoridae   | Acanthephyra curtirostris  | MIN | 0.0662  | 0.0234 | 2.29     | 10   |         |       |      | Cowles et al. 1991                          |
| III | 544.Decapoda  | Oplophoridae   | Acanthephyra curtirostris  |     | 0.0904  | 0.0226 | 2.29     | 5    |         |       |      | Cowles et al. 1991                          |
| III | 545.Decapoda  | Oplophoridae   | Acanthephyra curtirostris  |     | 0.1468  | 0.038  | 3.53     | 5.5  | 0.85    | 0.085 | 75.9 | Childress 1975                              |
| III | 546.Decapoda  | Oplophoridae   | Acanthephyra curtirostris  |     | 3.1683  | 0.82   | 3.53     | 5.5  | 0.85    | 0.085 | 75.9 | Childress 1975                              |
| III | 547.Decapoda  | Oplophoridae   | Acanthephyra smithi        | MIN | 1.6405  | 0.58   | 3.84     | 10   |         |       |      | Cowles et al. 1991                          |
| III | 548.Decapoda  | Oplophoridae   | Acanthephyra smithi        |     | 1.9799  | 1.4    | 3.84     | 20   |         |       |      | Cowles et al. 1991                          |
| III | 549.Decapoda  | Oplophoridae   | Acanthephyra smithi        |     | 3.6400  | 0.91   | 3.84     | 5    |         |       |      | Cowles et al. 1991                          |
| III | 550.Decapoda  | Axiidae        | Calastacus quinqueseriatus | MIN | 0.1665  | 0.035  | 3.21     | 2.5  |         |       |      | Childress et al. 1990                       |
| III | 551.Decapoda  | Axiidae        | Calastacus quinqueseriatus |     | 0.4000  | 0.10   | 3.13     | 5    |         |       |      | Childress et al. 1990                       |
| III | 552.Decapoda  | Axiidae        | Calastacus quinqueseriatus |     | 0.4808  | 0.17   | 1.73     | 10   |         |       |      | Childress et al. 1990                       |
| III | 553.Decapoda  | Axiidae        | Calastacus quinqueseriatus |     | 0.5400  | 0.27   | 1.38     | 15   |         |       |      | Childress et al. 1990                       |
| III | 554.Decapoda  | Callianideidae | Callinectes sapidus        | MIN | 0.5739  | 0.4058 | 142.4    | 20   |         |       |      | Lewis & Haefner 1976                        |
| III | 555.Decapoda  | Callianideidae | Callinectes sapidus        |     | 0.6863  | 0.4853 | 134.1    | 20   |         |       |      | Lewis & Haefner 1976                        |
| III | 556.Decapoda  | Callianideidae | Callinectes sapidus        |     | 0.7689  | 0.5437 | 158.9    | 20   |         |       |      | Lewis & Haefner 1976                        |
| III | 557.Decapoda  | Callianideidae | Callinectes sapidus        |     | 0.7771  | 0.5495 | 107.2    | 20   |         |       |      | Lewis & Haefner 1976                        |

|     |              |                        |                                      |     |         |        |          |      |          |       |      |  |      |  |  |  |  |  |                              |
|-----|--------------|------------------------|--------------------------------------|-----|---------|--------|----------|------|----------|-------|------|--|------|--|--|--|--|--|------------------------------|
| III | 558.Decapoda | Cancridae              | Cancer magister                      | MIN | 0.5565  | 0.3935 | 948      | 20   |          |       |      |  |      |  |  |  |  |  | Cameron 1975                 |
| III | 559.Decapoda | Cancridae              | Cancer pagurus                       | MIN | 0.093   | 0.033  | 460      | 10   |          |       |      |  |      |  |  |  |  |  | Aldrich 1975                 |
| III | 560.Decapoda | Portunidae             | Carcinus maenas                      | MIN | 0.3718  | 0.2629 | 52.8     | 20   |          |       |      |  |      |  |  |  |  |  | Taylor et al. 1977           |
| III | 561.Decapoda | Portunidae             | Carcinus maenas                      |     | 0.3847  | 0.2720 | 52.8     | 20   |          |       |      |  |      |  |  |  |  |  | Taylor et al. 1977           |
| III | 562.Decapoda | Portunidae             | Carcinus maenas                      |     | 0.5261  | 0.372  | 13.3     | 20   |          |       |      |  |      |  |  |  |  |  | Ivlev & Sutschenya 1961      |
| III | 563.Decapoda | Portunidae             | Carcinus maenas                      |     | 0.6180  | 0.437  | 12.7     | 20   |          |       |      |  |      |  |  |  |  |  | Ivlev & Sutschenya 1961      |
| III | 564.Decapoda | Parastacidae           | Cherax destructor                    | MIN | 0.4243  | 0.30   | 53       | 20   |          |       |      |  |      |  |  |  |  |  | Ellis & Morris 1995          |
| III | 565.Decapoda | Hyppolitidae           | Chorismus antarcticus                | MIN | 0.8465  | 0.133  | 2.273    | -1.7 | 0.593    |       |      |  | 74   |  |  |  |  |  | Opalinski 1991               |
| III | 566.Decapoda | Hyppolitidae           | Chorismus antarcticus                |     | 1.5759  | 0.320  | 5        | 2    | 1        |       |      |  | 80   |  |  |  |  |  | Opalinski 1991               |
| III | 567.Decapoda |                        | Cleistosoma edwardsii                | MIN | 1.6973  | 1.2002 | 0.818    | 20   |          |       |      |  |      |  |  |  |  |  | Dye & van der Veen 1980      |
| III | 568.Decapoda |                        | Cleistosoma edwardsii                |     | 1.8429  | 1.3031 | 0.818    | 20   |          |       |      |  |      |  |  |  |  |  | Dye & van der Veen 1980      |
| III | 569.Decapoda | Coenobitidae           | Coenobita compressus                 | MIN | 0.7979  | 0.5642 | 3.5      | 20   |          |       |      |  |      |  |  |  |  |  | Herreid & Full 1986          |
| III | 570.Decapoda | Coenobitidae           | Coenobita compressus                 |     | 1.0936  | 0.7733 | 3.7      | 20   |          |       |      |  |      |  |  |  |  |  | Herreid & Full 1986          |
| III | 571.Decapoda | Crangonidae            | Crangon abyssorum                    | MIN | 0.2624  | 0.078  | 1.20     | 7.5  |          |       |      |  |      |  |  |  |  |  | Childress et al. 1990        |
| III | 572.Decapoda | Crangonidae            | Crangon abyssorum                    |     | 0.4383  | 0.089  | 1.28     | 2.0  |          |       |      |  |      |  |  |  |  |  | Childress et al. 1990        |
| III | 573.Decapoda | Crangonidae            | Crangon affinis                      | MIN | 1.4159  | 1.0012 | 0.0506   | 20   |          |       |      |  |      |  |  |  |  |  | Ikeda 1970                   |
| III | 574.Decapoda | Crangonidae            | Crangon communis                     | MIN | 0.5346  | 0.189  | 2.91     | 10   |          |       |      |  |      |  |  |  |  |  | Childress et al. 1990        |
| III | 575.Decapoda | Crangonidae            | Crangon communis                     |     | 0.7120  | 0.178  | 4.69     | 5    |          |       |      |  |      |  |  |  |  |  | Childress et al. 1990        |
| III | 576.Decapoda | Crangonidae            | Crangon communis                     |     | 0.9780  | 0.489  | 2.14     | 15   |          |       |      |  |      |  |  |  |  |  | Childress et al. 1990        |
| III | 577.Decapoda | Xanthidae              | Eriphia spinifrons                   | MIN | 0.27    | 0.193  | 350      | 20   |          |       |      |  |      |  |  |  |  |  | Sutschenya & Abolmasova 1973 |
| III | 578.Decapoda | Gecarcinidae           | Gecarcinus lateralis                 | MIN | 0.0987  | 0.0698 | 40       | 20   |          |       |      |  |      |  |  |  |  |  | Taylor & Davies 1981         |
| III | 579.Decapoda | Gecarcinidae           | Gecarcinus lateralis                 |     | 0.1754  | 0.1240 | 20       | 20   |          |       |      |  |      |  |  |  |  |  | Taylor & Davies 1981         |
| III | 580.Decapoda | Gecarcinidae           | Gecarcinus lateralis                 |     | 0.3179  | 0.2248 | 140      | 20   |          |       |      |  |      |  |  |  |  |  | Cameron 1975                 |
| III | 581.Decapoda | Gecarcinidae           | Gecarcinus lateralis                 |     | 0.4387  | 0.3102 | 10       | 20   |          |       |      |  |      |  |  |  |  |  | Taylor & Davies 1981         |
| III | 582.Decapoda | Gecarcinidae           | Gecarcinus lateralis                 |     | 0.5920  | 0.4186 | 53.4     | 20   |          |       |      |  |      |  |  |  |  |  | Herreid et al. 1983          |
| III | 583.Decapoda | Aristeidae/Sergestidae | Gecarcoidea natalis                  | MIN | 0.7000  | 0.70   | 160      | 25   |          |       |      |  |      |  |  |  |  |  | Adamczewska & Morris 1994    |
| III | 584.Decapoda | Aristeidae/Sergestidae | Gennadas kempi /Petalidium foliaceum | MIN | 1.1635  | 0.21   | 1.64     | 0.3  | 0.49434  | 0.074 | 69.8 |  |      |  |  |  |  |  | Ikeda 1988                   |
| III | 585.Decapoda | Aristeidae/Sergestidae | Gennadas kempi /Petalidium foliaceum |     | 1.4505  | 0.26   | 0.96     | 0.2  | 0.28837  | 0.078 | 70.1 |  |      |  |  |  |  |  | Ikeda 1988                   |
| III | 586.Decapoda | Aristeidae/Sergestidae | Gennadas kempi /Petalidium foliaceum |     | 1.5063  | 0.27   | 0.55     | 0.2  | 0.16089  | 0.080 | 71.0 |  |      |  |  |  |  |  | Ikeda 1988                   |
| III | 587.Decapoda | Aristeidae             | Gennadas propinquus                  | MIN | 0.4134  | 0.107  | 1.62     | 5.5  | 0.378    | 0.089 | 76.7 |  |      |  |  |  |  |  | Childress 1975               |
| III | 588.Decapoda | Aristeidae             | Gennadas propinquus                  |     | 1.0432  | 0.27   | 1.62     | 5.5  | 0.378    | 0.089 | 76.7 |  |      |  |  |  |  |  | Childress 1975               |
| III | 589.Decapoda | Glyphocrangonidae      | Glyphocrangon vicaria                | MIN | 0.5278  | 0.20   | 9.85     | 11   |          |       |      |  |      |  |  |  |  |  | Childress et al. 1990        |
| III | 590.Decapoda | Glyphocrangonidae      | Glyphocrangon vicaria                |     | 0.5909  | 0.12   | 9.71     | 2    |          |       |      |  |      |  |  |  |  |  | Childress et al. 1990        |
| III | 591.Decapoda | Grapsidae              | Hemigrapsus nudus                    | MIN | 0.0106  | 0.0075 | 20       | 20   |          |       |      |  |      |  |  |  |  |  | Dehnel 1960                  |
| III | 592.Decapoda | Grapsidae              | Hemigrapsus nudus                    |     | 0.0151  | 0.0107 | 20       | 20   |          |       |      |  |      |  |  |  |  |  | Dehnel 1960                  |
| III | 593.Decapoda | Grapsidae              | Hemigrapsus oregonensis              | MIN | 0.0150  | 0.0106 | 20       | 20   |          |       |      |  |      |  |  |  |  |  | Dehnel 1960                  |
| III | 594.Decapoda | Grapsidae              | Hemigrapsus oregonensis              |     | 0.0199  | 0.0141 | 20       | 20   |          |       |      |  |      |  |  |  |  |  | Dehnel 1960                  |
| III | 595.Decapoda | Sundathelphusidae      | Holthuisana transversa               | MIN | 0.1481  | 0.1047 | 30       | 20   |          |       |      |  |      |  |  |  |  |  | MacMillen 1978               |
| III | 596.Decapoda | Sundathelphusidae      | Holthuisana transversa               |     | 0.1921  | 0.1358 | 20       | 20   |          |       |      |  |      |  |  |  |  |  | MacMillen 1978               |
| III | 597.Decapoda | Sundathelphusidae      | Holthuisana transversa               |     | 0.2249  | 0.1590 | 15       | 20   |          |       |      |  |      |  |  |  |  |  | MacMillen 1978               |
| III | 598.Decapoda | Sundathelphusidae      | Holthuisana transversa               |     | 0.2572  | 0.1819 | 12       | 20   |          |       |      |  |      |  |  |  |  |  | MacMillen 1978               |
| III | 599.Decapoda | Sundathelphusidae      | Holthuisana transversa               |     | 0.3015  | 0.2132 | 10       | 20   |          |       |      |  |      |  |  |  |  |  | MacMillen 1978               |
| III | 600.Decapoda | Sundathelphusidae      | Holthuisana transversa               |     | 0.4332  | 0.3063 | 5        | 20   |          |       |      |  |      |  |  |  |  |  | MacMillen 1978               |
| III | 601.Decapoda | Sundathelphusidae      | Holthuisana transversa               |     | 0.7577  | 0.5358 | 2        | 20   |          |       |      |  |      |  |  |  |  |  | MacMillen 1978               |
| III | 602.Decapoda | Nephropidae            | Homarus americanus                   | MIN | 0.3454  | 0.2442 | 180      | 20   |          |       |      |  |      |  |  |  |  |  | Penkoff & Thurberg 1982      |
| III | 603.Decapoda | Oplophoridae           | Hymenodora frontalis                 | MIN | 0.3516  | 0.091  | 1.4      | 5.5  | 0.507    | 0.059 | 63.8 |  |      |  |  |  |  |  | Childress 1975               |
| III | 604.Decapoda | Oplophoridae           | Hymenodora frontalis                 |     | 0.6993  | 0.181  | 1.4      | 5.5  | 0.507    | 0.059 | 63.8 |  |      |  |  |  |  |  | Childress 1975               |
| III | 605.Decapoda | Oplophoridae           | Janicella spinicauda                 | MIN | 1.7819  | 0.63   | 0.35     | 10   |          |       |      |  |      |  |  |  |  |  | Cowles et al. 1991           |
| III | 606.Decapoda | Oplophoridae           | Janicella spinicauda                 |     | 2.7153  | 1.92   | 0.35     | 20   |          |       |      |  |      |  |  |  |  |  | Cowles et al. 1991           |
| III | 607.Decapoda | Sergestidae            | Lucifer typus                        | MIN | 10.9115 | 6.267  | 0.000466 | 17   | 0.000068 |       |      |  | 85.4 |  |  |  |  |  | Ikeda 1970                   |
| III | 608.Decapoda | Hippolytidae           | Lysmata sp.                          | MIN | 5.0678  | 7.167  | 0.0109   | 30   | 0.00147  |       |      |  | 86.5 |  |  |  |  |  | Ikeda 1970                   |
| III | 609.Decapoda | Palaemonidae           | Macrobrachium acanthurus             | MIN | 1.3011  | 0.92   | 1.7      | 20   | 0.5      |       |      |  | ?71  |  |  |  |  |  | Moreira et al. 1983          |

|     |              |              |                            |     |        |        |          |     |      |       |      |                          |
|-----|--------------|--------------|----------------------------|-----|--------|--------|----------|-----|------|-------|------|--------------------------|
| III | 610.Decapoda | Palaemonidae | Macrobrachium heterochirus | MIN | 1.2587 | 0.89   | 2.6      | 20  | 0.75 | ?     | 71   | Moreira et al. 1983      |
| III | 611.Decapoda | Palaemonidae | Macrobrachium olfersi      | MIN | 0.8485 | 0.60   | 1.2      | 20  | 0.35 | ?     | 71   | Moreira et al. 1983      |
| III | 612.Decapoda | Palaemonidae | Macrobrachium potiuna      | MIN | 0.6930 | 0.49   | 0.68     | 20  | 0.2  | ?     | 71   | Moreira et al. 1983      |
| III | 613.Decapoda | Majidae      | Maja squinado              | MIN | 0.063  | 0.022  | 591      | 10  |      |       |      | Aldrich 1975             |
| III | 614.Decapoda | Xanthidae    | Menippe mercenaria         | MIN | 0.1732 | 0.1225 | 31.6     | 20  |      |       |      | Leffler 1973             |
| III | 615.Decapoda | Xanthidae    | Menippe mercenaria         |     | 3.2227 | 2.2788 | 0.0242   | 20  |      |       |      | Moots & Epifanio 1974    |
| III | 616.Decapoda | Xanthidae    | Menippe mercenaria         |     | 6.5721 | 4.6472 | 0.000303 | 20  |      |       |      | Moots & Epifanio 1974    |
| III | 617.Decapoda | Panaeidae    | Metapenaeus pruinus        | MIN | 2.6248 | 1.856  | 0.184    | 20  |      |       |      | Reiche 1968              |
| III | 618.Decapoda | Galatheidae  | Munidopsis verrilli        | MIN | 0.1427 | 0.03   | 5.62     | 2.5 |      |       |      | Childress et al. 1990    |
| III | 619.Decapoda | Crangonidae  | Notocrangon antarcticus    | MIN | 2.6543 | 0.539  | 1        | 2   | 0.4  |       | 60   | Opalinski 1991           |
| III | 620.Decapoda | Oplophoridae | Notostomus elegans         | MIN | 0.6680 | 0.167  | 22.54    | 5   |      |       |      | Cowles et al. 1991       |
| III | 621.Decapoda | Oplophoridae | Notostomus elegans         |     | 1.0126 | 0.358  | 22.54    | 10  |      |       |      | Cowles et al. 1991       |
| III | 622.Decapoda | Oplophoridae | Notostomus gibbosus        | MIN | 0.2400 | 0.06   | 10.40    | 5   |      |       |      | Cowles et al. 1991       |
| III | 623.Decapoda | Oplophoridae | Notostomus gibbosus        |     | 0.4525 | 0.16   | 10.40    | 10  |      |       |      | Cowles et al. 1991       |
| III | 624.Decapoda | Oplophoridae | Notostomus sp.             | MIN | 0.1158 | 0.027  | 40       | 4   | 2.8  | 0.086 | 93.0 | Childress 1975           |
| III | 625.Decapoda | Oplophoridae | Notostomus sp.             |     | 0.1801 | 0.042  | 40       | 4   | 2.8  | 0.086 | 93.0 | Childress 1975           |
| III | 626.Decapoda | Ocypodidae   | Ocypode platytarsis        | MIN | 0.7846 | 0.5548 | 10       | 20  |      |       |      | Veerannan 1974           |
| III | 627.Decapoda | Ocypodidae   | Ocypode platytarsis        |     | 1.0964 | 0.7753 | 5        | 20  |      |       |      | Veerannan 1974           |
| III | 628.Decapoda | Ocypodidae   | Ocypode platytarsis        |     | 1.3620 | 0.9631 | 3        | 20  |      |       |      | Veerannan 1974           |
| III | 629.Decapoda | Ocypodidae   | Ocypode platytarsis        |     | 1.6542 | 1.1697 | 2        | 20  |      |       |      | Veerannan 1974           |
| III | 630.Decapoda | Ocypodidae   | Ocypode platytarsis        |     | 1.7603 | 2.022  | 3.58     | 27  |      |       |      | Veerannan 1974           |
| III | 631.Decapoda | Ocypodidae   | Ocypode platytarsis        |     | 2.2691 | 1.6045 | 1        | 20  |      |       |      | Veerannan 1974           |
| III | 632.Decapoda | Ocypodidae   | Ocypode platytarsis        |     | 3.1735 | 2.2440 | 0.5      | 20  |      |       |      | Veerannan 1974           |
| III | 633.Decapoda | Ocypodidae   | Ocypode quadrata           | MIN | 0.4131 | 0.2921 | 70.9     | 20  |      |       |      | Full 1987                |
| III | 634.Decapoda | Ocypodidae   | Ocypode quadrata           |     | 0.7084 | 0.5009 | 26.9     | 20  |      |       |      | Full 1987                |
| III | 635.Decapoda | Ocypodidae   | Ocypode quadrata           |     | 0.8690 | 0.8108 | 33.3     | 24  |      |       |      | Full 1987                |
| III | 636.Decapoda | Ocypodidae   | Ocypode quadrata           |     | 1.4771 | 1.0445 | 2.1      | 20  |      |       |      | Full 1987                |
| III | 637.Decapoda | Oplophoridae | Oplophorus gracilorostris  | MIN | 3.7335 | 1.32   | 2.58     | 10  |      |       |      | Cowles et al. 1991       |
| III | 638.Decapoda | Oplophoridae | Oplophorus gracilorostris  |     | 4.0871 | 2.89   | 2.58     | 20  |      |       |      | Cowles et al. 1991       |
| III | 639.Decapoda | Oplophoridae | Oplophorus gracilorostris  |     | 6.5200 | 1.63   | 2.58     | 5   |      |       |      | Cowles et al. 1991       |
| III | 640.Decapoda | Oplophoridae | Oplophorus spinosus        | MIN | 1.7876 | 0.632  | 2.92     | 10  |      |       |      | Cowles et al. 1991       |
| III | 641.Decapoda | Oplophoridae | Oplophorus spinosus        |     | 4.1295 | 2.92   | 2.92     | 20  |      |       |      | Cowles et al. 1991       |
| III | 642.Decapoda | Oplophoridae | Oplophorus spinosus        |     | 4.2000 | 1.05   | 2.92     | 5   |      |       |      | Cowles et al. 1991       |
| III | 643.Decapoda | Grapsidae    | Pachygrapsus marmoratus    | MIN | 0.5791 | 0.4095 | 14.7     | 20  |      |       |      | Abolmasova 1970          |
| III | 644.Decapoda | Grapsidae    | Pachygrapsus marmoratus    |     | 0.6817 | 0.482  | 5.3      | 20  |      |       |      | Ivlev & Sutschenya 1961  |
| III | 645.Decapoda | Grapsidae    | Pachygrapsus marmoratus    |     | 0.6913 | 0.4888 | 7.77     | 20  |      |       |      | Abolmasova 1970          |
| III | 646.Decapoda | Grapsidae    | Pachygrapsus marmoratus    |     | 0.6995 | 0.4946 | 0.152    | 20  |      |       |      | Ivlev & Sutschenya 1961  |
| III | 647.Decapoda | Grapsidae    | Pachygrapsus marmoratus    |     | 0.7623 | 0.5390 | 5.09     | 20  |      |       |      | Abolmasova 1970          |
| III | 648.Decapoda | Grapsidae    | Pachygrapsus marmoratus    |     | 0.8573 | 0.6062 | 3.23     | 20  |      |       |      | Abolmasova 1970          |
| III | 649.Decapoda | Grapsidae    | Pachygrapsus marmoratus    |     | 1.1936 | 0.844  | 4.4      | 20  |      |       |      | Ivlev & Sutschenya 1961  |
| III | 650.Decapoda | Palaemonidae | Palaemon adspersus         | MIN | 1.5322 | 1.0834 | 3.2      | 20  |      |       |      | Romanova & Khmeleva 1978 |
| III | 651.Decapoda | Palaemonidae | Palaemon adspersus         |     | 1.6787 | 1.1870 | 3.28     | 20  |      |       |      | Romanova & Khmeleva 1978 |
| III | 652.Decapoda | Palaemonidae | Palaemon adspersus         |     | 3.4019 | 2.4055 | 0.132    | 20  |      |       |      | Romanova & Khmeleva 1978 |
| III | 653.Decapoda | Palaemonidae | Palaemon adspersus         |     | 3.5702 | 2.5245 | 0.1      | 20  |      |       |      | Romanova & Khmeleva 1978 |
| III | 654.Decapoda | Pandalidae   | Pandalopsis ampla          | MIN | 0.2994 | 0.089  | 9.55     | 7.5 |      |       |      | Childress et al. 1990    |
| III | 655.Decapoda | Pandalidae   | Pandalopsis ampla          |     | 0.5054 | 0.11   | 5.96     | 3   |      |       |      | Childress et al. 1990    |
| III | 656.Decapoda | Pandalidae   | Pandalus jordani           | MIN | 0.6800 | 0.34   | 12.80    | 15  |      |       |      | Childress et al. 1990    |
| III | 657.Decapoda | Pandalidae   | Pandalus jordani           |     | 0.9617 | 0.34   | 12.67    | 10  |      |       |      | Childress et al. 1990    |
| III | 658.Decapoda | Pandalidae   | Pandalus jordani           |     | 1.0000 | 0.25   | 12.08    | 5   |      |       |      | Childress et al. 1990    |
| III | 659.Decapoda | Pandalidae   | Pandalus platyceros        | MIN | 0.8200 | 0.41   | 32.26    | 15  |      |       |      | Childress et al. 1990    |
| III | 660.Decapoda | Pandalidae   | Pandalus platyceros        |     | 0.9200 | 0.23   | 25.40    | 5   |      |       |      | Childress et al. 1990    |
| III | 661.Decapoda | Pandalidae   | Pandalus platyceros        |     | 0.9334 | 0.33   | 40.89    | 10  |      |       |      | Childress et al. 1990    |

|     |              |                  |                           |     |        |        |       |      |         |       |      |  |  |  |  |  |  |  |                        |
|-----|--------------|------------------|---------------------------|-----|--------|--------|-------|------|---------|-------|------|--|--|--|--|--|--|--|------------------------|
| III | 662.Decapoda | Xanthidae        | Panopeus herbstii         | MIN | 0.4110 | 0.2906 | 10    | 20   |         |       |      |  |  |  |  |  |  |  | Leffler 1973           |
| III | 663.Decapoda | Xanthidae        | Panopeus herbstii         |     | 0.5483 | 0.3877 | 1     | 20   |         |       |      |  |  |  |  |  |  |  | Leffler 1973           |
| III | 664.Decapoda | Lithodidae       | Paralomis multispina      | MIN | 0.3079 | 0.067  | 7.64  | 3    |         |       |      |  |  |  |  |  |  |  | Childress et al. 1990  |
| III | 665.Decapoda | Parathelphusidae | Parathelphusa hydrodromus | MIN | 0.3079 | 0.2177 | 10    | 20   |         |       |      |  |  |  |  |  |  |  | Kotaiah & Rajabai 1972 |
| III | 666.Decapoda | Parathelphusidae | Parathelphusa hydrodromus |     | 0.3610 | 0.2553 | 10    | 20   |         |       |      |  |  |  |  |  |  |  | Kotaiah & Rajabai 1972 |
| III | 667.Decapoda | Pasiphaeidae     | Pasiphaea chacei          | MIN | 1.4194 | 0.422  | 1.73  | 7.5  | 0.353   | 0.101 | 79.5 |  |  |  |  |  |  |  | Childress 1975         |
| III | 668.Decapoda | Pasiphaeidae     | Pasiphaea chacei          |     | 2.4117 | 0.717  | 1.73  | 7.5  | 0.353   | 0.101 | 79.5 |  |  |  |  |  |  |  | Childress 1975         |
| III | 669.Decapoda | Pasiphaeidae     | Pasiphaea emarginata      | MIN | 0.2705 | 0.07   | 11.07 | 5.5  | 2.58    | 0.077 | 76.7 |  |  |  |  |  |  |  | Childress 1975         |
| III | 670.Decapoda | Pasiphaeidae     | Pasiphaea emarginata      |     | 2.7819 | 0.72   | 11.07 | 5.5  | 2.58    | 0.077 | 76.7 |  |  |  |  |  |  |  | Childress 1975         |
| III | 671.Decapoda | Pasiphaeidae     | Pasiphaea pacifica        | MIN | 1.3791 | 0.41   | 1.91  | 7.5  | 0.37    |       | 80.4 |  |  |  |  |  |  |  | Childress 1975         |
| III | 672.Decapoda | Pasiphaeidae     | Pasiphaea pacifica        |     | 1.8163 | 0.54   | 1.91  | 7.5  | 0.37    |       | 80.4 |  |  |  |  |  |  |  | Childress 1975         |
| III | 673.Decapoda | Pasiphaeidae     | Pasiphaea scotiae         | MIN | 1.3297 | 0.24   | 0.61  | 0.3  | 0.19591 | 0.062 | 68.0 |  |  |  |  |  |  |  | Ikeda 1988             |
| III | 674.Decapoda | Pasiphaeidae     | Pasiphaea scotiae         |     | 1.3390 | 0.24   | 1.26  | 0.2  | 0.40320 | 0.052 | 68.0 |  |  |  |  |  |  |  | Ikeda 1988             |
| III | 675.Decapoda | Penaeidae        | Penaeus sp.               | MIN | 3.0088 | 1.239  | 0.103 | 12.2 | 0.01558 |       | 84.9 |  |  |  |  |  |  |  | Ikeda 1970             |
| III | 676.Decapoda | Pandalidae       | Plesionika sp.            | MIN | 2.0478 | 0.53   | 1.92  | 5.5  | 0.43    | 0.099 | 77.7 |  |  |  |  |  |  |  | Childress 1975         |
| III | 677.Decapoda | Pandalidae       | Plesionika sp.            |     | 4.1342 | 1.07   | 1.92  | 5.5  | 0.43    | 0.099 | 77.7 |  |  |  |  |  |  |  | Childress 1975         |
| III | 678.Decapoda | Galatheididae    | Pleuoncodes planipes      | MIN | 1.1200 | 0.56   | 1.9   | 15   | 0.47    | 0.065 | 75.4 |  |  |  |  |  |  |  | Childress 1975         |
| III | 679.Decapoda | Crangonidae      | Sabinea septemcarinata    | MIN | 1.0748 | 0.19   | 4.1   | 0    |         |       |      |  |  |  |  |  |  |  | Schmid 1996            |
| III | 680.Decapoda | Crangonidae      | Sclerocrangon ferox       | MIN | 0.3790 | 0.067  | 13    | 0    |         |       |      |  |  |  |  |  |  |  | Schmid 1996            |
| III | 681.Decapoda | Scyllaridae      | Scylla serrata            | MIN | 1.0711 | 0.7574 | 10    | 20   |         |       |      |  |  |  |  |  |  |  | Veerannan 1972         |
| III | 682.Decapoda | Scyllaridae      | Scylla serrata            |     | 1.3964 | 0.9874 | 5     | 20   |         |       |      |  |  |  |  |  |  |  | Veerannan 1972         |
| III | 683.Decapoda | Scyllaridae      | Scylla serrata            |     | 1.6636 | 1.911  | 3.58  | 27   |         |       |      |  |  |  |  |  |  |  | Veerannan 1974         |
| III | 684.Decapoda | Scyllaridae      | Scylla serrata            |     | 1.6661 | 1.1781 | 3     | 20   |         |       |      |  |  |  |  |  |  |  | Veerannan 1972         |
| III | 685.Decapoda | Scyllaridae      | Scylla serrata            |     | 1.9041 | 1.3464 | 2     | 20   |         |       |      |  |  |  |  |  |  |  | Veerannan 1972         |
| III | 686.Decapoda | Scyllaridae      | Scylla serrata            |     | 1.9332 | 1.367  | 3.58  | 20   |         |       |      |  |  |  |  |  |  |  | Veerannan 1972         |
| III | 687.Decapoda | Scyllaridae      | Scylla serrata            |     | 2.5230 | 1.7840 | 1     | 20   |         |       |      |  |  |  |  |  |  |  | Veerannan 1972         |
| III | 688.Decapoda | Scyllaridae      | Scylla serrata            |     | 3.1577 | 2.2328 | 0.5   | 20   |         |       |      |  |  |  |  |  |  |  | Veerannan 1972         |
| III | 689.Decapoda | Sergestidae      | Sergestes bisulcatus      | MIN | 1.2800 | 0.32   | 2.54  | 5    |         |       |      |  |  |  |  |  |  |  | Cowles et al. 1991     |
| III | 690.Decapoda | Sergestidae      | Sergestes bisulcatus      |     | 1.3011 | 0.92   | 2.54  | 20   |         |       |      |  |  |  |  |  |  |  | Cowles et al. 1991     |
| III | 691.Decapoda | Sergestidae      | Sergestes bisulcatus      |     | 1.6405 | 0.58   | 2.54  | 10   |         |       |      |  |  |  |  |  |  |  | Cowles et al. 1991     |
| III | 692.Decapoda | Sergestidae      | Sergestes fulgens         | MIN | 1.8800 | 0.47   | 1.06  | 5    |         |       |      |  |  |  |  |  |  |  | Cowles et al. 1991     |
| III | 693.Decapoda | Sergestidae      | Sergestes fulgens         |     | 2.4042 | 0.85   | 1.06  | 10   |         |       |      |  |  |  |  |  |  |  | Cowles et al. 1991     |
| III | 694.Decapoda | Sergestidae      | Sergestes fulgens         |     | 3.5355 | 2.5    | 1.06  | 20   |         |       |      |  |  |  |  |  |  |  | Cowles et al. 1991     |
| III | 695.Decapoda | Sergestidae      | Sergestes phorcus         | MIN | 0.4868 | 0.126  | 3.951 | 5.5  | 0.89    | 0.103 | 77.5 |  |  |  |  |  |  |  | Childress 1975         |
| III | 696.Decapoda | Sergestidae      | Sergestes phorcus         |     | 1.5880 | 0.411  | 3.951 | 5.5  | 0.89    | 0.103 | 77.5 |  |  |  |  |  |  |  | Childress 1975         |
| III | 697.Decapoda | Sergestidae      | Sergestes similis         | MIN | 1.3633 | 0.482  | 0.57  | 10   | 0.133   | 0.110 | 76.6 |  |  |  |  |  |  |  | Childress 1975         |
| III | 698.Decapoda | Sergestidae      | Sergestes similis         |     | 4.5255 | 1.60   | 0.57  | 10   | 0.133   | 0.110 | 76.6 |  |  |  |  |  |  |  | Childress 1975         |
| III | 699.Decapoda | Sergestidae      | Sergestes tenuiremis      | MIN | 0.7600 | 0.19   | 2.61  | 5    |         |       |      |  |  |  |  |  |  |  | Cowles et al. 1991     |
| III | 700.Decapoda | Sergestidae      | Sergestes tenuiremis      |     | 0.8344 | 0.59   | 2.61  | 20   |         |       |      |  |  |  |  |  |  |  | Cowles et al. 1991     |
| III | 701.Decapoda | Sergestidae      | Sergestes tenuiremis      |     | 1.4142 | 0.50   | 2.61  | 10   |         |       |      |  |  |  |  |  |  |  | Cowles et al. 1991     |
| III | 702.Decapoda | Grapsidae        | Sesarma quadratus         | MIN | 1.1821 | 0.8359 | 5     | 20   |         |       |      |  |  |  |  |  |  |  | Veerannan 1974         |
| III | 703.Decapoda | Grapsidae        | Sesarma quadratus         |     | 1.4810 | 1.0472 | 3     | 20   |         |       |      |  |  |  |  |  |  |  | Veerannan 1974         |
| III | 704.Decapoda | Grapsidae        | Sesarma quadratus         |     | 1.7731 | 1.2538 | 2     | 20   |         |       |      |  |  |  |  |  |  |  | Veerannan 1974         |
| III | 705.Decapoda | Grapsidae        | Sesarma quadratus         |     | 2.3880 | 1.6886 | 1     | 20   |         |       |      |  |  |  |  |  |  |  | Veerannan 1974         |
| III | 706.Decapoda | Grapsidae        | Sesarma quadratus         |     | 3.3163 | 2.3450 | 0.5   | 20   |         |       |      |  |  |  |  |  |  |  | Veerannan 1974         |
| III | 707.Decapoda | Sicyoniidae      | Sicyonia igentis          | MIN | 0.6788 | 0.24   | 19.26 | 10   |         |       |      |  |  |  |  |  |  |  | Childress et al. 1990  |
| III | 708.Decapoda | Sicyoniidae      | Sicyonia igentis          |     | 1.3000 | 0.65   | 19.03 | 15   |         |       |      |  |  |  |  |  |  |  | Childress et al. 1990  |
| III | 709.Decapoda | Polychelidae     | Stereomastis sculpta      | MIN | 0.1189 | 0.025  | 16.76 | 2.5  |         |       |      |  |  |  |  |  |  |  | Childress et al. 1990  |
| III | 710.Decapoda | Grapsidae        | Systellaspis cristata     | MIN | 0.3130 | 0.081  | 1.39  | 5.5  | 0.378   | 0.065 | 72.8 |  |  |  |  |  |  |  | Childress 1975         |
| III | 711.Decapoda | Grapsidae        | Systellaspis cristata     |     | 3.0485 | 0.789  | 1.39  | 5.5  | 0.378   | 0.065 | 72.8 |  |  |  |  |  |  |  | Childress 1975         |
| III | 712.Decapoda | Oplophoridae     | Systellaspis debilis      | MIN | 1.2000 | 0.30   | 1.22  | 5    |         |       |      |  |  |  |  |  |  |  | Cowles et al. 1991     |
| III | 713.Decapoda | Oplophoridae     | Systellaspis debilis      |     | 1.3718 | 0.97   | 1.22  | 20   |         |       |      |  |  |  |  |  |  |  | Cowles et al. 1991     |

|     |                  |                 |                          |     |        |        |        |    |                    |
|-----|------------------|-----------------|--------------------------|-----|--------|--------|--------|----|--------------------|
| III | 714. Decapoda    | Oplophoridae    | Systellaspis debilis     |     | 1.5274 | 0.54   | 1.22   | 10 | Cowles et al. 1991 |
| III | 715. Decapoda    | Ocypodidae      | Uca leptodactyla         | MIN | 0.5319 | 0.3761 | 0.27   | 20 | Vernberg 1959      |
| III | 716. Decapoda    | Ocypodidae      | Uca minax                | MIN | 0.2703 | 0.1911 | 6.37   | 20 | Vernberg 1959      |
| III | 717. Decapoda    | Ocypodidae      | Uca mordax               | MIN | 0.4766 | 0.3370 | 2.58   | 20 | Vernberg 1959      |
| III | 718. Decapoda    | Ocypodidae      | Uca pugnax               | MIN | 0.2516 | 0.1779 | 2.21   | 20 | Silverthorn 1975   |
| III | 719. Decapoda    | Ocypodidae      | Uca pugnax               |     | 0.3240 | 0.2291 | 2.26   | 20 | Silverthorn 1975   |
| III | 720. Decapoda    | Ocypodidae      | Uca pugnax               |     | 0.4134 | 0.2923 | 2.61   | 20 | Silverthorn 1975   |
| III | 721. Decapoda    | Ocypodidae      | Uca pugnax               |     | 0.4284 | 0.3029 | 3      | 20 | Vernberg 1959      |
| III | 722. Decapoda    | Ocypodidae      | Uca pugnax               |     | 0.4718 | 0.3336 | 2.27   | 20 | Silverthorn        |
| III | 723. Decapoda    | Ocypodidae      | Uca rapax                | MIN | 0.5234 | 0.3701 | 3.85   | 20 | Vernberg 1959      |
| III | 724. Decapoda    | Ocypodidae      | Uca rapax                |     | 0.5951 | 0.4208 | 2.48   | 20 | Vernberg 1959      |
| III | 725. Decapoda    | Ocypodidae      | Uca thayeri              | MIN | 0.3651 | 0.2582 | 4.65   | 20 | Vernberg 1959      |
| III | 726. Decapoda    | Xanthidae       | Xantho hydrophilus       | MIN | 0.3294 | 0.2329 | 8.31   | 20 | Abolmasova 1969    |
| III | 727. Decapoda    | Xanthidae       | Xantho hydrophilus       |     | 0.3462 | 0.2448 | 16.52  | 20 | Abolmasova 1969    |
| III | 728. Decapoda    | Xanthidae       | Xantho hydrophilus       |     | 0.3953 | 0.2795 | 5.8    | 20 | Abolmasova 1969    |
| III | 729. Decapoda    | Xanthidae       | Xantho hydrophilus       |     | 0.3956 | 0.2797 | 13.7   | 20 | Abolmasova 1969    |
| III | 730. Decapoda    | Xanthidae       | Xantho hydrophilus       |     | 0.4121 | 0.2914 | 11.3   | 20 | Abolmasova 1969    |
| III | 731. Decapoda    | Xanthidae       | Xantho hydrophilus       |     | 0.4837 | 0.3420 | 6.2    | 20 | Abolmasova 1969    |
| III | 732. Decapoda    | Xanthidae       | Xantho hydrophilus       |     | 0.4871 | 0.3444 | 4.61   | 20 | Abolmasova 1969    |
| III | 733. Decapoda    | Xanthidae       | Xantho hydrophilus       |     | 0.5030 | 0.3557 | 3.06   | 20 | Abolmasova 1969    |
| III | 734. Decapoda    | Xanthidae       | Xantho hydrophilus       |     | 0.5268 | 0.3725 | 2.5    | 20 | Abolmasova 1969    |
| III | 735. Decapoda    | Xanthidae       | Xantho hydrophilus       |     | 0.5432 | 0.3841 | 3.9    | 20 | Abolmasova 1969    |
| III | 736. Decapoda    | Xanthidae       | Xantho hydrophilus       |     | 0.6107 | 0.4318 | 1.91   | 20 | Abolmasova 1969    |
| III | 737. Decapoda    | Xanthidae       | Xantho hydrophilus       |     | 0.7662 | 0.5418 | 0.906  | 20 | Abolmasova 1969    |
| IV  | 738. Cephalopoda | Octopodidae     | Bathypolypus articus     | MIN | 1.4625 | 0.2340 | 3.0    | 5  | Seibel 2007        |
| IV  | 739. Cephalopoda | Cranchidae      | Cranchia scabra          | MIN | 0.2256 | 0.0361 | 35.39  | 5  | Seibel 2007        |
| IV  | 740. Cephalopoda | Ommastrephidae  | Dosidicus gigas          | MIN | 2.7225 | 0.4356 | 12200  | 5  | Seibel 2007        |
| IV  | 741. Cephalopoda | Octopodidae     | Eledone cirrhosa         | MIN | 0.9100 | 0.1456 | 150    | 5  | Seibel 2007        |
| IV  | 742. Cephalopoda | Bolitaenidae    | Eledonella pygmaea       | MIN | 0.0388 | 0.0062 | 20.2   | 5  | Seibel 2007        |
| IV  | 743. Cephalopoda | Cranchidae      | Galiteuthis phyllura     | MIN | 0.4744 | 0.0759 | 5.19   | 5  | Seibel 2007        |
| IV  | 744. Cephalopoda | Gonatidae       | Gonatus onyx             | MIN | 1.9525 | 0.3124 | 0.117  | 5  | Seibel 2007        |
| IV  | 745. Cephalopoda | Gonatidae       | Gonatus pyros            | MIN | 2.4513 | 0.3922 | 3.840  | 5  | Seibel 2007        |
| IV  | 746. Cephalopoda | Cranchidae      | Helicocranchia pfeferi   | MIN | 0.3188 | 0.0510 | 3.60   | 5  | Seibel 2007        |
| IV  | 747. Cephalopoda | Histioteuthidae | Histioteuthis heteropsis | MIN | 0.3500 | 0.0560 | 36.98  | 5  | Seibel 2007        |
| IV  | 748. Cephalopoda | Histioteuthidae | Histioteuthis hoylei     | MIN | 0.8813 | 0.1410 | 8.51   | 5  | Seibel 2007        |
| IV  | 749. Cephalopoda | Ommastrephidae  | Illex illecebrosus       | MIN | 3.1113 | 0.4978 | 443    | 5  | Seibel 2007        |
| IV  | 750. Cephalopoda | Bolitaenidae    | Japetella diaphana       | MIN | 0.0313 | 0.0050 | 242.17 | 5  | Seibel 2007        |
| IV  | 751. Cephalopoda | Bolitaenidae    | Japetella heathi         | MIN | 0.0231 | 0.0037 | 162.50 | 5  | Seibel 2007        |
| IV  | 752. Cephalopoda | Cranchidae      | Liocranchia pacificus    | MIN | 0.1869 | 0.0299 | 2.12   | 5  | Seibel 2007        |
| IV  | 753. Cephalopoda | Cranchidae      | Liocranchia valdivia     | MIN | 0.2100 | 0.0336 | 21.28  | 5  | Seibel 2007        |
| IV  | 754. Cephalopoda | Loliginidae     | Loligo forbesi           | MIN | 3.2513 | 0.5202 | 937    | 5  | Seibel 2007        |
| IV  | 755. Cephalopoda | Loliginidae     | Loligo opalescens        | MIN | 4.3013 | 0.6882 | 30.0   | 5  | Seibel 2007        |
| IV  | 756. Cephalopoda | Loliginidae     | Loligo pealei            | MIN | 5.9888 | 0.9582 | 100    | 5  | Seibel 2007        |
| IV  | 757. Cephalopoda | Loliginidae     | Lolliguncula brevis      | MIN | 3.0025 | 0.4804 | 41.10  | 5  | Seibel 2007        |
| IV  | 758. Cephalopoda | Cranchidae      | Megalocranchia sp.       | MIN | 0.3031 | 0.0485 | 47.9   | 5  | Seibel 2007        |
| IV  | 759. Cephalopoda | Octopodidae     | Octopus bimaculoides     | MIN | 0.4431 | 0.0709 | 360    | 5  | Seibel 2007        |
| IV  | 760. Cephalopoda | Octopodidae     | Octopus briareus         | MIN | 0.5081 | 0.0813 | 345.5  | 5  | Seibel 2007        |
| IV  | 761. Cephalopoda | Octopodidae     | Octopus californicus     | MIN | 0.3031 | 0.0485 | 330    | 5  | Seibel 2007        |
| IV  | 762. Cephalopoda | Octopodidae     | Octopus cyanea           | MIN | 0.7700 | 0.1232 | 1150   | 5  | Seibel 2007        |
| IV  | 763. Cephalopoda | Octopodidae     | Octopus dofleini         | MIN | 0.2331 | 0.0373 | 8200   | 5  | Seibel 2007        |
| IV  | 764. Cephalopoda | Octopodidae     | Octopus maya             | MIN | 1.9056 | 0.3049 | 45.1   | 5  | Seibel 2007        |
| IV  | 765. Cephalopoda | Octopodidae     | Octopus micropyrsus      | MIN | 1.2831 | 0.2053 | 4.65   | 5  | Seibel 2007        |





- Abolmasova G.I. (1970) Feeding and analysis of some elements of energy balance in Black Sea crabs. *Gidrobiologicheskii zhurnal* 6: 62-70. (in Russian)
- Adamczewska A.M., Morris S. (1994) Exercise in the terrestrial Christmas Island red crab *Gecarcoidea natalis*. II. Energetics of locomotion. *J. exp. Biol.* 188: 257-274.
- Aldrich J.C. (1975) Individual variability in oxygen consumption rates of fed and starved *Cancer pagurus* and *Maia squinado*. *Comparative Biochemistry and Physiology* 51A: 175-183.
- Alekseeva T.A., Zotin A.I. (2001) Standard metabolism and macrotaxonomy of crustaceans. *Izv. Akad. Nauk Ser. Biol.* 2001(2): 198-204. (in Russian)
- Armitage K.B., Lei C.-H. (1979) Temperature acclimatization in the filtering rates and oxygen consumption of *Daphnia ambigua* Scornfield. *Comp. Biochem. Physiol.* 62A:807-812.
- Barnes H., Barnes M. (1969) Seasonal changes in the acutely determined oxygen consumption and effect of temperature for three common cirripedes, *Balanus balanoides* (L), *B. Balanus* (L) and *Chthamalus stellatus* (Poli). *J. Exp. Marine Biol. Ecol.* 4: 36-50.
- Braginski L.P. (1957) Respiration intensity and oxygen limit in some Caspian peracarids from Black Sea lagoons. *Zoologicheskii zhurnal* 36: 504-510. (in Russian)
- Bulnheim H.-P. (1979) Comparative studies on the physiological ecology of five euryhaline *Gammarus* species. *Oecologia* 44: 80-86.
- Byzova Yu.B. (1973) Respiration of soil invertebrates. In: *Ecology of soil invertebrates*, Moscow: Nauka, pp. 3-39. (in Russian)
- Castellani C., Robinson C., Smith T., Lampitt R.S. (2005) Temperature affects respiration rate of *Oithona similis*. *Marine Ecology Progress Series* 285: 129-135.
- Childress J.J. (1975) The respiratory rates of midwater crustaceans as a function of depth of occurrence and relation of the oxygen minimum layer off southern California. *Comp. Biochem. Physiol.* 50A: 787-799.
- Childress J.J., Cowles D.L., Favuzzi J.A., Mickel T.J. (1990) Metabolic rates of benthic deep-sea decapod crustaceans decline with increasing depth primarily due to the decline in temperature. *Deep-Sea Research* 37: 929-949.
- Clark D.P. (1955) The influence of body weight, temperature and season upon the rate of oxygen consumption of the terrestrial amphipod *Talitrus sylvaticus* (Haswell). *Biological Bulletin* 108: 253-257.
- Cameron J.N. (1975) Aerial gas exchange in the terrestrial Brachyura *Gecarcinus lateralis* and *Cardisoma guanhumi*. *Comp. Biochem. Physiol.* 52A:129-134.
- Conover R.J. (1960) The feeding behavior and respiration of some marine planktonic Crustacea. *Biological Bulletin* 119: 399-415.
- Cowles D.L., Childress J.J., Wells M.E. (1991) Metabolic rates of midwater crustaceans as a function of depth of occurrence off the Hawaiian Islands: food availability as a selective factor? *Marine Biology* 110: 75-83.
- Dehnel P.A. (1960) Effect of temperature and salinity on the oxygen consumption of two intertidal crabs. *Biol. Bull.* 118: 215-249.
- Dye A.H., van der Veen L. (1980) Respiratory responses of winter acclimated grapsoid crabs to a number of environmental parameters. *Comp. Biochem. Physiol.* 67A: 643-648.
- Edney E.B. (1964) Acclimation to temperature in terrestrial isopods. II. Heart rate and standard metabolic rate. *Physiological Zoology* 37: 378-393.
- Edney E.B., Spencer J.O. (1955) Cutaneous respiration in woodlice. *Journal of Experimental Biology* 32: 256-269.

- Edwards G.A. (1946) The influence of temperature upon the oxygen consumption of the beach flea *Talorchestia megalophthalma*. *Journal of Cellular and Comparative Physiology* 21: 183-189.
- Edwards G.A., Irving L. (1943) The influence of season and temperature upon the oxygen consumption of the beach flea, *Talorchestia megalophthalma*. *J. Cell. Comp. Physiol.* 21: 183-189.
- Ellis B.A., Morris S. (1995) Effects of extreme pH on the physiology of the Australian 'yabby' *Cherax destructor*: Acute and chronic changes in haemolymph oxygen levels, oxygen consumption and metabolite levels. *Journal of Experimental Biology* 198: 409-418.
- Engelmann M.D. (1961) The role of soil arthropods in the energetics of an old field community. *Ecological Monographs* 81: 221-238.
- Fish J.D., Preece G.S. (1970) The ecophysiological complex of *Bathyporeia pilosa* and *B. pelagica* (Crustacea: Amphipoda). I. Respiration rate. *Mar. Biol.* 5: 22-28.
- Foulds J.B., Roff J.C. (1976) Oxygen consumption during simulated vertical migration in *Mysis relicta* (Crustacea, Mysidacea). *Can. J. Zool.* 54: 377-385.
- Full R.Y. (1987) Locomotion energetics of the ghost crab. 1. Metabolic cost and endurance. *J. exp. Biol.* 130: 137-153.
- Goss L.B., Bunting D.L. (1980) Temperature effects on zooplankton respiration. *Comp. Biochem. Physiol.* 66A: 651-658.
- Herreid C.F., Full R.Y. (1986) Energetic of hermit crabs during locomotion: the cost of carrying shell. *J. Exp. Biol.* 120: 297-308.
- Herreid C.F., O'Mahoney P.M., Full R.J. (1983) Locomotion in land crabs: respiratory and cardiac response of *Gecarcinus lateralis*. *Comp. Biochem. Physiol.* 74A: 117-124.
- Hervant, F., Mathieu, J., Barré, H., Simon, K. & Pinon, C. (1997) Comparative study on the behavioral, ventilatory and respiratory responses of hypogean and epigean crustaceans to long-term starvation and subsequent feeding. *Comparative Biochemistry and Physiology* 118A: 1277-1283.
- Ikeda T. (1970) Relationship between respiration rate and body size in marine plankton animals as a function of the temperature of habitat. *Bull. Fac. Fish* 21: 91-112.
- Ikeda T. (1971) Changes in respiration rate and in composition of organic matter in *Calanus cristatus* (Crustacea: Copepoda) under starvation. *Bull. Fac. Fish* 21: 280-298.
- Ikeda T. (1988) Metabolism and chemical composition of crustaceans from the Antarctic mesopelagic zone. *Deep-Sea Research* 35: 1991-2002.
- Ikeda T., Kanno Y., Ozaki K., Shinada A. (2001) Metabolic rates of epipelagic marine copepods as a function of body mass and temperature. *Marine Biology* 139: 587-596.
- Ikeda T., Mitchell A.W. (1982) Oxygen uptake, ammonia excretion, and phosphate excretion by krill and other Antarctic zooplankton in relation to their body size and chemical composition. *Marine Biology* 71: 283-298.
- Ikeda T., Sano F., Yamaguchi A. (2004) Metabolism and body composition of a copepod (*Neocalanus cristatus*: Crustacea) from the bathypelagic zone of the Oyashio region, western subarctic Pacific. *Marine Biology* 145: 1181-1190.
- Ikeda T., Skjoldal H.R. (1989) Metabolism and elemental composition of zooplankton from the Barents Sea during early Arctic summer. *Marine Biology* 100: 173-183.
- Ivanova M.B., Korobtsova E.V. (1974) Ecophysiological peculiarities of *Polyartemia forcipata* (Anostraca) from tundra water bodies in East Murman. *Zoologicheskii zhurnal* 53: 1140-1147. (in Russian)

- Ivlev V.S., Sutschenya L.M. (1961) Intensity of atmospheric and aquatic respiration in some marine crustaceans. *Zoologicheskii zhurnal* 40: 1345-1353. (in Russian)
- Jawed M. (1973) Effects environmental factors and body size on rates of oxygen consumption in *Archaeomysis grebnitzkii* and *Neomysis awatschensis* (Crustacea; Mysidae) *Mar. Biol.* 21: 173-179.
- Kawall H.G., Torres J.T., Geiger S.P. (2001) Effects of the ice-edge bloom and season on the metabolism of copepods in the Weddell Sea, Antarctica. *Hydrobiologia* 453/454: 67-77.
- Khmeleva M.N. (1973) Energy metabolism of *Idothea baltica basteri* (Aud.). In: Energy metabolism of aquatic animals, Moscow: Nauka, pp. 5-27. (in Russian)
- Kititsina L.A. (1980) Ecophysiological peculiarities of the freshwater shrimp *Dekergammarus haemobaphes* (Eich) in the region of Tripol hydropower hot water discharges. *Gidrobiologicheskii zhurnal* 16: 77-85.
- Klyashtorin L.B., Kuzmicheva V.I. (1975) Level of energetic expenditures during active locomotion in planktonic crustaceans. *Okeanologia* 15: 891-897. (in Russian)
- Kotaiyah K., Rajabai B.S. (1972) Influence of thermal acclimation on oxygen consumption in the tropical freshwater crab, *Paratelphusa hydrodromus* (Herbst), with reference to size, sex and sudden changes of temperature. *Indian J. exp. Biol.* 10: 375-378.
- Kuzmicheva V.I., Kukina I.V. (1974) On respiration intensity in mysids at different numbers of individuals in respirometers. *Okeanologia* 14: 898-902. (in Russian)
- Leffler C.W. (1973) Metabolic rate in relation to body size and environmental oxygen concentration in two species of xanthid crabs. *Comp. Biochem. Physiol.* 44A: 1047-1052.
- Lewis E.G., Haefner P. A. (1976) Oxygen consumption of the blue crab, *Callinectes sapidus* Rathbun, from proecdysis to postecdysis. *Comp. Biochem. Physiol.* 54A: 55-60.
- Luxmoore R.A. (1984) A comparison of the respiration rate of some Antarctic isopod with species from lower latitudes. *Br. Antart. Surv. Bull.* 62: 53-65.
- MacMillen R.E. (1978) Adjustments of energy and water metabolism to drought in an Australian arid-zone crab. *Physiol. Zool.* 51: 230-240.
- Moots C.A., Epifanio C.E. (1974) An energy budget for *Menippe mercenaria* larvae fed *Artemia* nauplii. *Biol. Bull.* 146: 44-55.
- Moreira G.S., McNamara J.C., Shumway S.E., Moreira P.S. (1983) Osmoregulation and respiratory metabolism in Brazilian *Macrobrachium* (Decapoda, Palaemonidae). *Comp. Biochem. Physiol.* 74A(1): 57-62.
- Morrison P.R. (1946) Physiological observations on water loss and oxygen consumption in *Peripatus*. *Biological Bulletin* 91: 181-188.
- Müller I. (1943) Untersuchungen über die Gesetzmäßigkeit des Wachstums. X. Weiteres zur Frage der Abhängigkeit der Atmung von der Körpergröße. *Biol. Zbl.* 63: 446-453.
- Nival P., Nival S., Palazzoli I. (1972) Données sur la respiration de différents organismes communs dans le plancton de Villeranche-sur-Mer. *Mar. Biol.* 17: 63-76.
- Opalinski K.W. (1991) Respiratory metabolism and metabolic adaptations of Antarctic krill *Euphausia superba*. *Pol. Arch. Hydrobiol.* 38: 183-263.
- Pavlova E.P. (1961) Oxygen consumption by some planktonic crustaceans of the Sevastopol Bay. *Transactions of the Sevastopol Biological Station* 14: 79-90. (in Russian)

- Pavlova E.P. (1975) Metabolism of Mediterranean zooplankton. Chapter 7 in: Biological structure and productivity of the planktonic communities in the Mediterranean, Kiev: Naukova Dumka, pp. 124-144.
- Penkoff S.J., Thurberg F.P. (1982) Changes in oxygen consumption of the american lobster, *Homarus americanus*, during the moult cycle. Comp. Biochem. Physiol. 72A: 621-622.
- Phillipson J., Watson J. (1965) Respiratory metabolism of the terrestrial isopod *Oniscus asellus* L. Oikos 16: 78-87.
- Rajagopal P.K. (1962) Respiration of some marine planktonic organisms. Proc. Indian Acad. Sci. 55B: 76-81.
- Reiche D.E. (1968) Relation of body size to food intake oxygen consumption and trace element metabolism in forest floor arthropods. Ecology 49: 538-542.
- Robertson R.F., El-Haj A.J., Clarke A., Peck L.S., Taylor E.W. (2001) The effects of temperature on metabolic rate and protein synthesis following a meal in the isopod *Glyptonotus antarcticus* Eights (1852). Polar Biology 24: 677-686
- Romanova Z.A., Khmeleva N.N. (1978) Respiration of crustaceans within their natural geographic range. Biologia morya 46: 29-35. (in Russian)
- Saito S. (1965) Structure and energetics of the population of *Ligidium japonica* (Isopoda) in a warm climate forest ecosystem. Japanese Journal of Ecology 15: 47-55.
- Schindler D.W. (1968) Feeding, assimilation and respiration rates of *Daphnia magma* under various environmental conditions and their relation to production estimates. J. anim. Ecol. 37:369-385.
- Schmid M.K. (1996) Zur Verbreitung und Respiration ökologisch wichtiger Bodentiere in den Gewässern um Svålbard (Arktis). Berichte zur Polarforschung 202: 1-93.
- Seibel B.A. (2007) On the depth and scale of metabolic rate variation: scaling of oxygen consumption rates and enzymatic activity in the Class Cephalopoda (Mollusca). J. Exp. Biol. 210: 1-11.
- Silverthorn S.U. (1975) Hormonal involvement in thermal acclimation in the fiddler crab *Uca pugilator* (Bose). I. Effect of eyestalk extracts on whole animal respiration. Comp. Biochem. Physiol. 50A:281-284.
- Simčič T., Brancelj A. (2006) Effects of pH on electron transport system (ETS) activity and oxygen consumption in *Gammarus fossarum*, *Asellus aquaticus* and *Niphargus sphagnicolus*. Freshwater Biology 51: 686-694.
- Simčič T., Lukančič S., Brancelj A. (2005) Comparative study of electron transport system activity and oxygen consumption of amphipods from caves and surface habitats. Freshwater Biology 50: 494-501.
- Steffensen J.F. (2002) Metabolic cold adaptation of polar fish based on measurements of aerobic oxygen consumption: fact or artefact? Artefact! Comparative Biochemistry and Physiology 132: 789-795.
- Sutschenya L.M., Abolmasova G.I. (1973) Metabolic intensity in the crab *Eriphia spinifrons* (Herbst) Sav. from the Black Sea. In: Energy metabolism of aquatic animals, Moscow: Nauka, pp. 42-49. (in Russian)
- Taylor A.C., Davies P.S. (1981) Respiration in the land crab, *Gecarcinus lateralis* (Fremenville). J. Exp Biol. 93: 197-208.
- Taylor E.W., Butler P.J., Alwassia A. (1977) Effect of a decrease in salinity on respiration, osmoregulation and activity in shore crab, *Carcinus maenas* L., at different acclimation temperature. J. Comp. Physiol. 119: 155-170.
- Thuesen E.V., Childress J.J. (1993) Enzymatic activities and metabolic rates of pelagic chaetognaths: Lack of depth-related declines. Limnology & Oceanography 38: 935-948.

- Thuesen E.V., Childress J.J. (1994) Oxygen consumption rates and metabolic enzyme activities of oceanic California medusae in relation to body size and habitat depth. *Biological Bulletin* 187: 84-98.
- Thuesen E.V., Miller C.B., Childress J.J. (1998) Ecophysiological interpretation of oxygen consumption rates and enzymatic activities of deep-sea copepods. *Marine Ecology Progress Series* 168: 95-107.
- Tscherbakov A.P., Muragina T.A. (1953) Respiration intensity in the tadpole shrimp (*Apus cancriformis* Schöff.). *Zoologicheskii zhurnal* 32: 844-847. (in Russian)
- Veerannan K.M. (1972) Respiratory Metabolism of Crabs from Marine and Estuarine Habitats. I. *Scylla serrata*. *Marine Biology* 17: 284-290.
- Veerannan K.M. (1974) Respiratory metabolism of crabs from marine habitats: an interpecific comparison. *Marine Biology* 26: 35-43.
- Vernberg F.Y. (1959) Studies on the physiological variation between tropical and temperate zone fiddler crabs of the genus *Uca*. II. Oxygen consumption of whole organisms. *Biol. Bull.* 117: 163-184.
- White C. R., Phillips N.R., Seymour R.S. (2006) The scaling and temperature dependence of vertebrate metabolism. *Biological Letters* 2: 125-127.
- Wieser W. (1963) Parameter des Sauerstoffverbrauches. II. Die Wirkung von Temperatur, Licht und anderen Haltungsbedingungen auf den Sauerstoffverbrauch von *Porcellio scaber* Latr. (Isopoda). *Z. vergl. Physiol.* 47: 1-16.
- Wieser W. (1965) Untersuchungen über die Ernährung und dem Gesamtstoffwechsel von *Porcellio scaber* (Crustacea: Isopoda). *Pedobiologia* 5: 304-331.
- Will A. (1952) Körpergrösse, Körperzeiten und Energiebilanz. VI. Körpergrösse und  $O_2$ -Konsum bei Schaben und Asellen (Isopoda). *Z. vergl. Physiol.* 341: 20-25.
