# Supplementary material
Source: PubMed Central journal article supplement (PMC2579366)
Supplement: 0802148105_DS5_PDF.pdf [file 0802148105_DS5_PDF.pdf]

## Dataset S5. Standard metabolic rates in ectothermic vertebrates

Standard metabolic rates of amphibia and reptilia were taken from White, C. R., Phillips, N. R. & Seymour, R. S. The scaling and temperature dependence of vertebrate metabolism. *Biol. Lett.* **2**, 125–127 (2006). Minimum mass-specific value for each species was taken, resulting in 158 values for 158 amphibian species (out of 682 values available in White et al. (2006)) and 156 values for 156 reptilian species (out of 483 values available in White et al. (2006)). These minimum values are presented in Table **S5a** (amphibians) and Table **S5b** (reptiles) below.

Database [www.fishbase.org](http://www.fishbase.org) was searched for fish metabolism data, of which only routine and standard values obtained with non-stressed animals were considered. This yielded a total of 6,333 values of mass-specific metabolic rate for 266 species. For each species the minimum value was taken, listed below in Table **S5c**.

Notations to Tables **S5a**, **S5b**, **S5c**:

**qWkg** is standard (or, in some cases in fish, routine) metabolic rate in Watts per kilogram (converted from oxygen uptake rates at 1 ml O<sub>2</sub> = 20 J); **TC** is ambient temperature at which measurements were taken, degrees Celsius; **q25Wkg** is metabolic rate converted to 25 °C using  $Q_{10} = 1.65, 2.21$  and  $2.44$  for fish, amphibians and reptiles, respectively (White et al. 2006),  $q25Wkg = qWkg \times Q_{10}^{(25 - TC)/10}$ , dimension W (kg WM)<sup>-1</sup>; **Mg** is wet body mass in grams; **Log** stands for decimal logarithms of the corresponding variables.

For a discussion of the differences between standard and routine metabolic rates in aquatic versus terrestrial ectotherms see SI Methods.

Table **S5a**. Standard metabolic rates in amphibians (after White et al. 2006)

| Species                              | q25Wkg | Logq25Wkg | Mg    | LogMg  | TC | qWkg  |
|--------------------------------------|--------|-----------|-------|--------|----|-------|
| 1. <i>Acris crepitans</i>            | 0.369  | -0.433    | 1.59  | 0.201  | 15 | 0.167 |
| 2. <i>Agalychnis callidryas</i>      | 0.492  | -0.308    | 5.65  | 0.752  | 20 | 0.331 |
| 3. <i>Ambystoma gracile</i>          | 0.256  | -0.592    | 30.39 | 1.483  | 15 | 0.116 |
| 4. <i>Ambystoma jeffersonianum</i>   | 0.435  | -0.362    | 8.92  | 0.950  | 15 | 0.197 |
| 5. <i>Ambystoma macrodactylum</i>    | 0.396  | -0.402    | 3.414 | 0.533  | 15 | 0.179 |
| 6. <i>Ambystoma maculatum</i>        | 0.281  | -0.551    | 15.83 | 1.199  | 15 | 0.127 |
| 7. <i>Ambystoma mexicanum</i>        | 0.105  | -0.979    | 21.3  | 1.328  | 22 | 0.083 |
| 8. <i>Ambystoma opacum</i>           | 0.246  | -0.609    | 4.65  | 0.667  | 14 | 0.103 |
| 9. <i>Ambystoma talpoideum</i>       | 0.981  | -0.008    | 7     | 0.845  | 15 | 0.444 |
| 10. <i>Ambystoma tigrinum</i>        | 0.157  | -0.804    | 10.78 | 1.033  | 15 | 0.071 |
| 11. <i>Amphiuma means</i>            | 0.068  | -1.167    | 352   | 2.547  | 5  | 0.014 |
| 12. <i>Amphiuma tridactylum</i>      | 0.046  | -1.337    | 652   | 2.814  | 15 | 0.021 |
| 13. <i>Aneides ferreus</i>           | 0.334  | -0.476    | 2.73  | 0.436  | 15 | 0.151 |
| 14. <i>Aneides flavipunctatus</i>    | 0.323  | -0.491    | 4.57  | 0.660  | 15 | 0.146 |
| 15. <i>Aneides hardii</i>            | 0.437  | -0.360    | 0.97  | -0.013 | 20 | 0.294 |
| 16. <i>Aneides lugubris</i>          | 0.329  | -0.483    | 5.58  | 0.747  | 15 | 0.149 |
| 17. <i>Batrachoseps attenuatus</i>   | 0.479  | -0.320    | 0.93  | -0.032 | 25 | 0.479 |
| 18. <i>Bolitoglossa franklini</i>    | 0.212  | -0.674    | 3.18  | 0.502  | 15 | 0.096 |
| 19. <i>Bolitoglossa morio</i>        | 0.261  | -0.583    | 2.09  | 0.320  | 15 | 0.118 |
| 20. <i>Bolitoglossa occidentalis</i> | 0.256  | -0.592    | 0.97  | -0.013 | 15 | 0.116 |
| 21. <i>Bolitoglossa subpalmata</i>   | 0.264  | -0.578    | 1.63  | 0.212  | 5  | 0.054 |
| 22. <i>Bombina orientalis</i>        | 0.462  | -0.335    | 2.6   | 0.415  | 20 | 0.311 |
| 23. <i>Boulengerula taitanus</i>     | 0.433  | -0.364    | 5     | 0.699  | 35 | 0.956 |
| 24. <i>Bufo alvaris</i>              | 0.966  | -0.015    | 150.8 | 2.178  | 15 | 0.437 |
| 25. <i>Bufo americanus</i>           | 0.229  | -0.640    | 50    | 1.699  | 20 | 0.154 |
| 26. <i>Bufo boreas</i>               | 0.150  | -0.824    | 57.8  | 1.762  | 20 | 0.101 |
| 27. <i>Bufo bufo</i>                 | 0.460  | -0.337    | 76.13 | 1.882  | 15 | 0.208 |
| 28. <i>Bufo calamita</i>             | 0.479  | -0.320    | 8.7   | 0.940  | 20 | 0.322 |
| 29. <i>Bufo cognatus</i>             | 0.409  | -0.388    | 40.2  | 1.604  | 25 | 0.409 |
| 30. <i>Bufo debilis</i>              | 1.571  | 0.196     | 0.66  | -0.180 | 15 | 0.711 |
| 31. <i>Bufo marinus</i>              | 0.130  | -0.886    | 145   | 2.161  | 15 | 0.059 |
| 32. <i>Bufo terrestris</i>           | 0.629  | -0.201    | 19.8  | 1.297  | 25 | 0.629 |

|      |                                        |       |        |        |        |      |       |
|------|----------------------------------------|-------|--------|--------|--------|------|-------|
| 33.  | <i>Bufo viridis</i>                    | 0.207 | -0.684 | 35     | 1.544  | 20   | 0.139 |
| 34.  | <i>Bufo woodhousii</i>                 | 0.221 | -0.656 | 56.3   | 1.751  | 25   | 0.221 |
| 35.  | <i>Ceratophrys calcarata</i>           | 0.297 | -0.527 | 55.5   | 1.744  | 25   | 0.297 |
| 36.  | <i>Chiromantis petersi</i>             | 0.394 | -0.405 | 11.2   | 1.049  | 25   | 0.394 |
| 37.  | <i>Chiropoterotriton bromeliacia</i>   | 0.301 | -0.521 | 0.59   | -0.229 | 15   | 0.136 |
| 38.  | <i>Colostethus inguinalis</i>          | 0.718 | -0.144 | 1.57   | 0.196  | 20   | 0.483 |
| 39.  | <i>Colostethus nubicola</i>            | 0.895 | -0.048 | 0.27   | -0.569 | 25   | 0.895 |
| 40.  | <i>Colostethus trinitatus</i>          | 1.117 | 0.048  | 1      | 0.000  | 25   | 1.117 |
| 41.  | <i>Conraua goliath</i>                 | 0.417 | -0.380 | 251    | 2.400  | 25   | 0.417 |
| 42.  | <i>Crinia parinsignifera</i>           | 1.413 | 0.150  | 0.452  | -0.345 | 30   | 2.101 |
| 43.  | <i>Crinia signifera</i>                | 1.333 | 0.125  | 0.621  | -0.207 | 25   | 1.333 |
| 44.  | <i>Cryptobranchus alleganiensis</i>    | 0.172 | -0.764 | 423    | 2.626  | 25   | 0.172 |
| 45.  | <i>Cyclorana platycephala</i>          | 0.659 | -0.181 | 11     | 1.041  | 15   | 0.298 |
| 46.  | <i>Dendrobates auratus</i>             | 0.500 | -0.301 | 1.77   | 0.248  | 25   | 0.500 |
| 47.  | <i>Desmognathus fuscus</i>             | 0.354 | -0.451 | 2.09   | 0.320  | 20   | 0.238 |
| 48.  | <i>Desmognathus monticola</i>          | 0.351 | -0.455 | 3.43   | 0.535  | 20   | 0.236 |
| 49.  | <i>Desmognathus ochrophaes</i>         | 0.268 | -0.572 | 1.6    | 0.204  | 17.5 | 0.148 |
| 50.  | <i>Desmognathus quadramaculatus</i>    | 0.190 | -0.721 | 23.41  | 1.369  | 5    | 0.039 |
| 51.  | <i>Dicamptodon ensatus</i>             | 0.159 | -0.799 | 101.25 | 2.005  | 15   | 0.072 |
| 52.  | <i>Discoglossus pictus</i>             | 0.306 | -0.514 | 30.7   | 1.487  | 20   | 0.206 |
| 53.  | <i>Eleutherodactylus coqui</i>         | 0.340 | -0.469 | 4.06   | 0.609  | 20   | 0.229 |
| 54.  | <i>Eleutherodactylus portoricensis</i> | 0.851 | -0.070 | 3.7    | 0.568  | 15   | 0.385 |
| 55.  | <i>Ensatina eschscholtzi</i>           | 0.374 | -0.427 | 5.3    | 0.724  | 25   | 0.374 |
| 56.  | <i>Eurycea bislineata</i>              | 0.376 | -0.425 | 1.14   | 0.057  | 5    | 0.077 |
| 57.  | <i>Eurycea longicauda</i>              | 0.393 | -0.406 | 1.57   | 0.196  | 15   | 0.178 |
| 58.  | <i>Eurycea multiplicata</i>            | 0.267 | -0.573 | 0.71   | -0.149 | 15   | 0.121 |
| 59.  | <i>Eurycea nana</i>                    | 0.476 | -0.322 | 0.154  | -0.812 | 25   | 0.476 |
| 60.  | <i>Eurycea neotenes</i>                | 0.590 | -0.229 | 0.243  | -0.614 | 25   | 0.590 |
| 61.  | <i>Eurycea pterophila?</i>             | 0.499 | -0.302 | 0.196  | -0.708 | 25   | 0.499 |
| 62.  | <i>Gastrophryne carolinensis</i>       | 0.430 | -0.367 | 1.9    | 0.279  | 20   | 0.289 |
| 63.  | <i>Geotrypetes seraphini</i>           | 0.306 | -0.514 | 1.93   | 0.286  | 20   | 0.206 |
| 64.  | <i>Gyrinophilus danielsi</i>           | 0.274 | -0.562 | 14.44  | 1.160  | 15   | 0.124 |
| 65.  | <i>Gyrinophilus porphyricus</i>        | 0.178 | -0.750 | 12.4   | 1.093  | 15.5 | 0.084 |
| 66.  | <i>Hydromantes sp.</i>                 | 0.471 | -0.327 | 3.23   | 0.509  | 15   | 0.213 |
| 67.  | <i>Hyla arborea</i>                    | 2.922 | 0.466  | 7.78   | 0.891  | 18.5 | 1.745 |
| 68.  | <i>Hyla arenicolor</i>                 | 0.736 | -0.133 | 3.37   | 0.528  | 20   | 0.495 |
| 69.  | <i>Hyla chrysoscelis</i>               | 0.693 | -0.159 | 3.9    | 0.591  | 10   | 0.211 |
| 70.  | <i>Hyla cinerea</i>                    | 0.567 | -0.246 | 4.5    | 0.653  | 25   | 0.567 |
| 71.  | <i>Hyla crepitans</i>                  | 0.644 | -0.191 | 9.9    | 0.996  | 25   | 0.644 |
| 72.  | <i>Hyla crucifer</i>                   | 0.908 | -0.042 | 1.15   | 0.061  | 20   | 0.611 |
| 73.  | <i>Hyla gratiosa</i>                   | 0.384 | -0.416 | 13.9   | 1.143  | 29   | 0.528 |
| 74.  | <i>Hyla maxima</i>                     | 0.528 | -0.277 | 41.4   | 1.617  | 25   | 0.528 |
| 75.  | <i>Hyla regilla</i>                    | 0.299 | -0.524 | 2.27   | 0.356  | 21   | 0.218 |
| 76.  | <i>Hyla squirella</i>                  | 0.783 | -0.106 | 2.2    | 0.342  | 27   | 0.917 |
| 77.  | <i>Hyla versicolor</i>                 | 0.697 | -0.157 | 8.62   | 0.936  | 19   | 0.433 |
| 78.  | <i>Hyperolius marmoratus</i>           | 0.555 | -0.256 | 1      | 0.000  | 20   | 0.373 |
| 79.  | <i>Hyperolius parallelus</i>           | 0.632 | -0.199 | 1      | 0.000  | 20   | 0.425 |
| 80.  | <i>Hyperolius tuberilinguis</i>        | 0.560 | -0.252 | 1      | 0.000  | 20   | 0.377 |
| 81.  | <i>Hyperolius viridiflavus</i>         | 0.776 | -0.110 | 0.9    | -0.046 | 20   | 0.522 |
| 82.  | <i>Kaloula pulchra</i>                 | 0.214 | -0.670 | 30.7   | 1.487  | 20   | 0.144 |
| 83.  | <i>Kassina senegalensis</i>            | 0.623 | -0.206 | 3.02   | 0.480  | 20   | 0.419 |
| 84.  | <i>Kassina weali</i>                   | 0.421 | -0.376 | 6.25   | 0.796  | 20   | 0.283 |
| 85.  | <i>Lepidobatrachus llanensis</i>       | 0.539 | -0.268 | 88.5   | 1.947  | 25   | 0.539 |
| 86.  | <i>Leptodactylus typhoniis</i>         | 0.639 | -0.194 | 5.1    | 0.708  | 25   | 0.639 |
| 87.  | <i>Microhyla carolinensis</i>          | 0.811 | -0.091 | 3.5    | 0.544  | 15   | 0.367 |
| 88.  | <i>Molga torosa?</i>                   | 1.452 | 0.162  | 17.5   | 1.243  | 18.5 | 0.867 |
| 89.  | <i>Necturus maculosus</i>              | 0.110 | -0.959 | 125    | 2.097  | 25   | 0.110 |
| 90.  | <i>Notophthalmus viridescens</i>       | 0.372 | -0.429 | 3      | 0.477  | 20   | 0.250 |
| 91.  | <i>Occidozyga martensii</i>            | 0.291 | -0.536 | 9.3    | 0.968  | 35   | 0.644 |
| 92.  | <i>Odontophrynus americanus</i>        | 0.297 | -0.527 | 15.24  | 1.183  | 20   | 0.200 |
| 93.  | <i>Osteopilus septentrionalis</i>      | 0.546 | -0.263 | 5      | 0.699  | 20   | 0.367 |
| 94.  | <i>Phyllomedusa sauvagei</i>           | 0.529 | -0.277 | 17.5   | 1.243  | 10   | 0.161 |
| 95.  | <i>Physalaemus pustulosus</i>          | 0.650 | -0.187 | 2.9    | 0.462  | 25   | 0.650 |
| 96.  | <i>Plethodon cinereus</i>              | 0.283 | -0.548 | 0.6    | -0.222 | 17.5 | 0.156 |
| 97.  | <i>Plethodon dorsalis</i>              | 0.192 | -0.717 | 0.69   | -0.161 | 25   | 0.192 |
| 98.  | <i>Plethodon glutinosus</i>            | 0.275 | -0.561 | 5.01   | 0.700  | 20   | 0.185 |
| 99.  | <i>Plethodon jordani</i>               | 0.234 | -0.631 | 3.1    | 0.491  | 5    | 0.048 |
| 100. | <i>Plethodon neomexicanus</i>          | 0.339 | -0.470 | 2.47   | 0.393  | 25   | 0.339 |
| 101. | <i>Plethodon spp.</i>                  | 0.403 | -0.395 | 3.25   | 0.512  | 22   | 0.318 |
| 102. | <i>Pseudacris nigrita</i>              | 0.900 | -0.046 | 1      | 0.000  | 25   | 0.900 |
| 103. | <i>Pseudacris triseriata</i>           | 0.405 | -0.393 | 0.94   | -0.027 | 5    | 0.083 |
| 104. | <i>Pseudobranchius striatus</i>        | 0.283 | -0.548 | 2.19   | 0.340  | 25   | 0.283 |
| 105. | <i>Pseudoeurycea belli</i>             | 0.163 | -0.788 | 24.45  | 1.388  | 25   | 0.163 |
| 106. | <i>Pseudoeurycea brunnata</i>          | 2.420 | 0.384  | 3.33   | 0.522  | 15   | 1.095 |
| 107. | <i>Pseudoeurycea cephalica</i>         | 0.301 | -0.521 | 1.45   | 0.161  | 15   | 0.136 |
| 108. | <i>Pseudoeurycea cochranae</i>         | 0.252 | -0.599 | 2.23   | 0.348  | 15   | 0.114 |
| 109. | <i>Pseudoeurycea gadovii</i>           | 0.362 | -0.441 | 2.88   | 0.459  | 15   | 0.164 |
| 110. | <i>Pseudoeurycea goebeli</i>           | 0.259 | -0.587 | 3.78   | 0.577  | 5    | 0.053 |
| 111. | <i>Pseudoeurycea leprosa</i>           | 0.278 | -0.556 | 2.46   | 0.391  | 15   | 0.126 |

|      |                                    |       |        |       |        |      |       |
|------|------------------------------------|-------|--------|-------|--------|------|-------|
| 112. | <i>Pseudoeurycea rex</i>           | 0.259 | -0.587 | 1.86  | 0.270  | 15   | 0.117 |
| 113. | <i>Pseudoeurycea smithii</i>       | 0.219 | -0.660 | 6.66  | 0.823  | 15   | 0.099 |
| 114. | <i>Pseudotriton ruber</i>          | 0.171 | -0.767 | 10.81 | 1.034  | 5    | 0.035 |
| 115. | <i>Pternohyla fodiens</i>          | 0.265 | -0.577 | 15.1  | 1.179  | 20   | 0.178 |
| 116. | <i>Pyxicephalus adspersus</i>      | 0.210 | -0.678 | 562.3 | 2.750  | 20   | 0.141 |
| 117. | <i>Rana arvalis</i>                | 0.674 | -0.171 | 17    | 1.230  | 5    | 0.138 |
| 118. | <i>Rana aspersa</i>                | 0.524 | -0.281 | 563   | 2.751  | 18.5 | 0.313 |
| 119. | <i>Rana berlandieri</i>            | 0.406 | -0.391 | 70    | 1.845  | 29   | 0.558 |
| 120. | <i>Rana blythi</i>                 | 0.274 | -0.562 | 88.7  | 1.948  | 25   | 0.274 |
| 121. | <i>Rana cancrivora</i>             | 0.413 | -0.384 | 20.45 | 1.311  | 30   | 0.614 |
| 122. | <i>Rana catesbeiana</i>            | 0.137 | -0.863 | 262   | 2.418  | 5    | 0.028 |
| 123. | <i>Rana chalconota</i>             | 0.530 | -0.276 | 4.1   | 0.613  | 25   | 0.530 |
| 124. | <i>Rana clamitans</i>              | 0.462 | -0.335 | 32.5  | 1.512  | 25   | 0.462 |
| 125. | <i>Rana cyanophlyctis</i>          | 2.968 | 0.472  | 0.294 | -0.532 | 29   | 4.076 |
| 126. | <i>Rana erythraea</i>              | 0.115 | -0.939 | 19    | 1.279  | 15   | 0.052 |
| 127. | <i>Rana esculenta</i>              | 0.108 | -0.967 | 15.2  | 1.182  | 23   | 0.092 |
| 128. | <i>Rana hexadactyla</i>            | 0.934 | -0.030 | 51.9  | 1.715  | 29   | 1.283 |
| 129. | <i>Rana magna</i>                  | 0.311 | -0.507 | 34.2  | 1.534  | 30   | 0.463 |
| 130. | <i>Rana muscosa</i>                | 0.217 | -0.664 | 13.5  | 1.130  | 4    | 0.041 |
| 131. | <i>Rana nicobariensis</i>          | 0.547 | -0.262 | 2.6   | 0.415  | 25   | 0.547 |
| 132. | <i>Rana palustris</i>              | 0.748 | -0.126 | 36    | 1.556  | 21.5 | 0.567 |
| 133. | <i>Rana pipiens</i>                | 0.256 | -0.592 | 34.8  | 1.542  | 10   | 0.078 |
| 134. | <i>Rana ridibunda</i>              | 0.265 | -0.577 | 35    | 1.544  | 20   | 0.178 |
| 135. | <i>Rana sylvatica</i>              | 0.600 | -0.222 | 6     | 0.778  | 25   | 0.600 |
| 136. | <i>Rana temporaria</i>             | 0.088 | -1.056 | 39    | 1.591  | 15   | 0.040 |
| 137. | <i>Rana virgatipes</i>             | 0.542 | -0.266 | 7     | 0.845  | 5    | 0.111 |
| 138. | <i>Rhyacotriton olympicus</i>      | 1.178 | 0.071  | 2.6   | 0.415  | 15   | 0.533 |
| 139. | <i>Salamandra maculosa</i>         | 1.197 | 0.078  | 28.32 | 1.452  | 18.5 | 0.715 |
| 140. | <i>Salamandra salamandra</i>       | 0.171 | -0.767 | 75    | 1.875  | 16   | 0.084 |
| 141. | <i>Scaphiopus bombifrons</i>       | 1.708 | 0.232  | 13.3  | 1.124  | 15   | 0.773 |
| 142. | <i>Scaphiopus couchii</i>          | 0.564 | -0.249 | 24.6  | 1.391  | 21   | 0.411 |
| 143. | <i>Scaphiopus hammondii</i>        | 0.687 | -0.163 | 12.74 | 1.105  | 21   | 0.500 |
| 144. | <i>Scaphiopus holbrooki</i>        | 1.028 | 0.012  | 14    | 1.146  | 15   | 0.465 |
| 145. | <i>Siren intermedia</i>            | 0.183 | -0.738 | 13.7  | 1.137  | 25   | 0.183 |
| 146. | <i>Siren lacertina</i>             | 0.063 | -1.201 | 269   | 2.430  | 25   | 0.063 |
| 147. | <i>Smilisca baudinii</i>           | 0.820 | -0.086 | 23.7  | 1.375  | 15   | 0.371 |
| 148. | <i>Taricha granulosa</i>           | 0.301 | -0.521 | 6.56  | 0.817  | 15   | 0.136 |
| 149. | <i>Taricha rivularis</i>           | 0.340 | -0.469 | 10.83 | 1.035  | 15   | 0.154 |
| 150. | <i>Taricha torosa</i>              | 0.164 | -0.785 | 9.87  | 0.994  | 10   | 0.050 |
| 151. | <i>Telmatobius culeus</i>          | 0.256 | -0.592 | 122.3 | 2.087  | 10   | 0.078 |
| 152. | <i>Telmatobius marmoratus</i>      | 0.913 | -0.040 | 18.4  | 1.265  | 10   | 0.278 |
| 153. | <i>Thorius sp.</i>                 | 0.316 | -0.500 | 0.31  | -0.509 | 15   | 0.143 |
| 154. | <i>Triturus cristatus</i>          | 1.005 | 0.002  | 7     | 0.845  | 10   | 0.306 |
| 155. | <i>Triturus vulgaris</i>           | 1.033 | 0.014  | 8.75  | 0.942  | 25   | 1.033 |
| 156. | <i>Typhlonectes compressicauda</i> | 0.262 | -0.582 | 30.62 | 1.486  | 25   | 0.262 |
| 157. | <i>Xenopus laevis</i>              | 0.227 | -0.644 | 139   | 2.143  | 20   | 0.153 |
| 158. | <i>Xenopus mulleri</i>             | 1.096 | 0.040  | 24    | 1.380  | 17   | 0.581 |

Table S5b. Standard metabolic rates in reptiles (after White et al. 2006)

| Species | q25Wkg                             | Logq25Wkg | Mg     | LogMg  | TC    | qWkg |       |
|---------|------------------------------------|-----------|--------|--------|-------|------|-------|
| 1.      | <i>Acabthodactylus boskianus</i>   | 0.437     | -0.360 | 7.8    | 0.892 | 40   | 1.667 |
| 2.      | <i>Acanthodactylus erythrurus</i>  | 0.797     | -0.099 | 9      | 0.954 | 35   | 1.945 |
| 3.      | <i>Acanthodactylus ophiodurus</i>  | 0.740     | -0.131 | 3.8    | 0.580 | 30   | 1.156 |
| 4.      | <i>Acanthodactylus pardalis</i>    | 1.020     | 0.009  | 9.7    | 0.987 | 40   | 3.889 |
| 5.      | <i>Acanthodactylus schmidti</i>    | 0.505     | -0.297 | 14.5   | 1.161 | 35   | 1.233 |
| 6.      | <i>Acanthodactylus schreiberi</i>  | 0.407     | -0.390 | 10.9   | 1.037 | 40   | 1.550 |
| 7.      | <i>Acanthodactylus scutellatus</i> | 0.671     | -0.173 | 6.6    | 0.820 | 40   | 2.556 |
| 8.      | <i>Acanthophis praelongus</i>      | 0.167     | -0.777 | 105.5  | 2.023 | 30   | 0.261 |
| 9.      | <i>Acontias meleagris</i>          | 0.253     | -0.597 | 7.3    | 0.863 | 33   | 0.517 |
| 10.     | <i>Acrantophis dumerili</i>        | 0.066     | -1.180 | 2548.5 | 3.406 | 20   | 0.042 |
| 11.     | <i>Acrochordus araduræ</i>         | 0.084     | -1.076 | 1047.7 | 3.020 | 30   | 0.131 |
| 12.     | <i>Aligator mississippiensis</i>   | 0.118     | -0.928 | 1287   | 3.110 | 10   | 0.031 |
| 13.     | <i>Amblyrhynchus cristatus</i>     | 0.203     | -0.693 | 747.5  | 2.874 | 25   | 0.203 |
| 14.     | <i>Amphibolurus barbatus</i>       | 0.267     | -0.573 | 373    | 2.572 | 37   | 0.778 |
| 15.     | <i>Amphibolurus nuchalis</i>       | 0.351     | -0.455 | 24.65  | 1.392 | 40   | 1.339 |
| 16.     | <i>Anarbylus switaki</i>           | 0.410     | -0.387 | 9.48   | 0.977 | 25   | 0.410 |
| 17.     | <i>Anguis fragilis</i>             | 0.209     | -0.680 | 12.067 | 1.082 | 30   | 0.327 |
| 18.     | <i>Anniella pulchra</i>            | 0.363     | -0.440 | 4.8466 | 0.685 | 25   | 0.363 |
| 19.     | <i>Anolis acutus</i>               | 1.031     | 0.013  | 4.3    | 0.633 | 30   | 1.611 |
| 20.     | <i>Anolis bonariensis</i>          | 0.302     | -0.520 | 12     | 1.079 | 27   | 0.361 |
| 21.     | <i>Anolis carolinensis</i>         | 0.669     | -0.175 | 4.5    | 0.653 | 30   | 1.045 |
| 22.     | <i>Anolis limifrons</i>            | 0.694     | -0.159 | 1.5    | 0.176 | 20   | 0.444 |
| 23.     | <i>Antaresia childreni</i>         | 0.212     | -0.674 | 331.7  | 2.521 | 24   | 0.194 |
| 24.     | <i>Antaresia stimsoni</i>          | 0.203     | -0.693 | 349.9  | 2.544 | 30   | 0.317 |
| 25.     | <i>Aspidites melanocephalus</i>    | 0.223     | -0.652 | 1027.5 | 3.012 | 24   | 0.204 |

|      |                                    |       |        |        |        |    |       |
|------|------------------------------------|-------|--------|--------|--------|----|-------|
| 26.  | <i>Blanus cinereus</i>             | 0.626 | -0.203 | 2.4    | 0.380  | 30 | 0.978 |
| 27.  | <i>Boa constrictor</i>             | 0.058 | -1.237 | 7815.5 | 3.893  | 30 | 0.090 |
| 28.  | <i>Bunopus tuberculatus</i>        | 2.330 | 0.367  | 2.5    | 0.398  | 35 | 5.684 |
| 29.  | <i>Candoia carinatus</i>           | 0.064 | -1.194 | 521.9  | 2.718  | 20 | 0.041 |
| 30.  | <i>Chalcides ocellatus</i>         | 0.256 | -0.592 | 22.06  | 1.344  | 33 | 0.522 |
| 31.  | <i>Chelydra serpentina</i>         | 0.072 | -1.143 | 3473   | 3.541  | 10 | 0.019 |
| 32.  | <i>Chironius quadricarinatus</i>   | 0.295 | -0.530 | 61     | 1.785  | 20 | 0.189 |
| 33.  | <i>Cnemidophorus murinus</i>       | 0.267 | -0.573 | 85     | 1.929  | 40 | 1.017 |
| 34.  | <i>Cnemidophorus tigris</i>        | 0.498 | -0.303 | 18     | 1.255  | 30 | 0.778 |
| 35.  | <i>Coleonyx variegatus</i>         | 0.814 | -0.089 | 3.43   | 0.535  | 25 | 0.814 |
| 36.  | <i>Coluber constrictor</i>         | 0.146 | -0.836 | 262    | 2.418  | 35 | 0.356 |
| 37.  | <i>Corallus caninus</i>            | 0.077 | -1.114 | 556    | 2.745  | 20 | 0.049 |
| 38.  | <i>Corallus enhydris</i>           | 0.083 | -1.081 | 802    | 2.904  | 30 | 0.130 |
| 39.  | <i>Cosymbotus platyurus</i>        | 0.465 | -0.333 | 3.5    | 0.544  | 27 | 0.556 |
| 40.  | <i>Crotalus viridis</i>            | 0.146 | -0.836 | 301    | 2.479  | 35 | 0.356 |
| 41.  | <i>Crotaphytus collaris</i>        | 0.534 | -0.272 | 30     | 1.477  | 37 | 1.556 |
| 42.  | <i>Ctenotus labillardieri</i>      | 0.620 | -0.208 | 2.8    | 0.447  | 20 | 0.397 |
| 43.  | <i>Cyclagras gigas</i>             | 0.278 | -0.556 | 2680   | 3.428  | 20 | 0.178 |
| 44.  | <i>Diadophis punctatus</i>         | 0.469 | -0.329 | 4.4    | 0.643  | 30 | 0.733 |
| 45.  | <i>Diplometopon zarudnyi</i>       | 0.348 | -0.458 | 6.34   | 0.802  | 35 | 0.850 |
| 46.  | <i>Dipsas albifrons</i>            | 0.312 | -0.506 | 22     | 1.342  | 20 | 0.200 |
| 47.  | <i>Dipsosaurus dorsalis</i>        | 0.233 | -0.633 | 40.36  | 1.606  | 45 | 1.389 |
| 48.  | <i>Egernia cunninghami</i>         | 0.295 | -0.530 | 261    | 2.417  | 20 | 0.189 |
| 49.  | <i>Elaphe guttata</i>              | 0.628 | -0.202 | 800    | 2.903  | 25 | 0.628 |
| 50.  | <i>Epicrates cenchria</i>          | 0.104 | -0.983 | 416    | 2.619  | 30 | 0.162 |
| 51.  | <i>Eryx colubrinus</i>             | 0.128 | -0.893 | 85.85  | 1.934  | 20 | 0.082 |
| 52.  | <i>Eumeces fasciatus</i>           | 0.853 | -0.069 | 7      | 0.845  | 30 | 1.333 |
| 53.  | <i>Eumeces inexpectatus</i>        | 0.544 | -0.264 | 9.6    | 0.982  | 30 | 0.850 |
| 54.  | <i>Eumeces obsoletus</i>           | 0.434 | -0.363 | 30     | 1.477  | 20 | 0.278 |
| 55.  | <i>Eunectes murinus</i>            | 0.183 | -0.738 | 1130   | 3.053  | 20 | 0.117 |
| 56.  | <i>Eunectes notaeus</i>            | 0.130 | -0.886 | 14400  | 4.158  | 20 | 0.083 |
| 57.  | <i>Garthia gaudichaudi</i>         | 0.531 | -0.275 | 0.805  | -0.094 | 25 | 0.531 |
| 58.  | <i>Gekko gecko</i>                 | 0.343 | -0.465 | 61.5   | 1.789  | 30 | 0.536 |
| 59.  | <i>Gerrhonotus multicarinatus</i>  | 0.494 | -0.306 | 29     | 1.462  | 20 | 0.316 |
| 60.  | <i>Gonotodes antillensis</i>       | 0.413 | -0.384 | 1.8    | 0.255  | 34 | 0.922 |
| 61.  | <i>Helicops modestus</i>           | 0.196 | -0.708 | 196    | 2.292  | 30 | 0.306 |
| 62.  | <i>Hemidactylus frenatus</i>       | 0.488 | -0.312 | 2      | 0.301  | 27 | 0.583 |
| 63.  | <i>Iguana iguana</i>               | 0.286 | -0.544 | 795    | 2.900  | 37 | 0.833 |
| 64.  | <i>Klauberina riversiana</i>       | 0.045 | -1.347 | 19     | 1.279  | 35 | 0.111 |
| 65.  | <i>Lacerta agilis</i>              | 1.109 | 0.045  | 8.4    | 0.924  | 35 | 2.706 |
| 66.  | <i>Lacerta sicula</i>              | 0.472 | -0.326 | 9      | 0.954  | 20 | 0.302 |
| 67.  | <i>Lacerta trilineata</i>          | 0.198 | -0.703 | 71     | 1.851  | 20 | 0.127 |
| 68.  | <i>Lacerta viridis</i>             | 0.234 | -0.631 | 31     | 1.491  | 20 | 0.150 |
| 69.  | <i>Lacerta vivipara</i>            | 0.843 | -0.074 | 3.95   | 0.597  | 30 | 1.317 |
| 70.  | <i>Lampropeltis getulus</i>        | 0.143 | -0.845 | 1217   | 3.085  | 26 | 0.156 |
| 71.  | <i>Lampropeltis miliaris</i>       | 0.267 | -0.573 | 401    | 2.603  | 25 | 0.267 |
| 72.  | <i>Leimadophis poecilogyrus</i>    | 0.347 | -0.460 | 42     | 1.623  | 20 | 0.222 |
| 73.  | <i>Lepidophyma gaigeae</i>         | 0.366 | -0.437 | 5      | 0.699  | 15 | 0.150 |
| 74.  | <i>Lepidophyma smithi</i>          | 0.249 | -0.604 | 25     | 1.398  | 30 | 0.389 |
| 75.  | <i>Liasis fuscus</i>               | 0.078 | -1.108 | 1306.9 | 3.116  | 30 | 0.122 |
| 76.  | <i>Liasis olivaceus</i>            | 0.091 | -1.041 | 3000.7 | 3.477  | 24 | 0.083 |
| 77.  | <i>Lichanura roseofusca</i>        | 0.208 | -0.682 | 314    | 2.497  | 32 | 0.389 |
| 78.  | <i>Lichanura trivirgata</i>        | 0.114 | -0.943 | 182    | 2.260  | 20 | 0.073 |
| 79.  | <i>Masticodyras bifossatus</i>     | 0.373 | -0.428 | 735    | 2.866  | 20 | 0.239 |
| 80.  | <i>Masticophis flagellum</i>       | 1.936 | 0.287  | 262    | 2.418  | 35 | 4.723 |
| 81.  | <i>Morelia spilota variegata</i>   | 0.092 | -1.036 | 2173.5 | 3.337  | 30 | 0.144 |
| 82.  | <i>Natrix maura</i>                | 0.214 | -0.670 | 22.5   | 1.352  | 5  | 0.036 |
| 83.  | <i>Natrix natrix helretica</i>     | 0.131 | -0.883 | 82.5   | 1.916  | 5  | 0.022 |
| 84.  | <i>Nerodia rhombifera</i>          | 0.338 | -0.471 | 238    | 2.377  | 30 | 0.528 |
| 85.  | <i>Ophisaurus ventralis</i>        | 0.214 | -0.670 | 32.185 | 1.508  | 25 | 0.214 |
| 86.  | <i>Oxyrhopus trigeminus</i>        | 0.303 | -0.519 | 98     | 1.991  | 20 | 0.194 |
| 87.  | <i>Pelamis platurus</i>            | 0.213 | -0.672 | 116    | 2.064  | 30 | 0.333 |
| 88.  | <i>Philodryas olfersii</i>         | 0.339 | -0.470 | 176    | 2.246  | 20 | 0.217 |
| 89.  | <i>Philodryas patagoniensis</i>    | 0.442 | -0.355 | 388    | 2.589  | 20 | 0.283 |
| 90.  | <i>Philodryas serra</i>            | 0.303 | -0.519 | 135    | 2.130  | 20 | 0.194 |
| 91.  | <i>Phrynosoma cornutum</i>         | 0.378 | -0.423 | 35     | 1.544  | 35 | 0.922 |
| 92.  | <i>Phrynosoma douglassi</i>        | 0.389 | -0.410 | 28     | 1.447  | 35 | 0.950 |
| 93.  | <i>Phrynosoma m'calli</i>          | 0.524 | -0.281 | 16     | 1.204  | 37 | 1.528 |
| 94.  | <i>Physignathus lesueurii</i>      | 0.267 | -0.573 | 504    | 2.702  | 37 | 0.778 |
| 95.  | <i>Pituophis melanoleucus</i>      | 0.166 | -0.780 | 548    | 2.739  | 20 | 0.106 |
| 96.  | <i>Pituophis catenifer affinis</i> | 0.142 | -0.848 | 548    | 2.739  | 30 | 0.222 |
| 97.  | <i>Podarcis hispanica</i>          | 0.423 | -0.374 | 3.43   | 0.535  | 10 | 0.111 |
| 98.  | <i>Podarcis lilfordi brauni</i>    | 0.634 | -0.198 | 7.4    | 0.869  | 20 | 0.406 |
| 99.  | <i>Podarcis muralis</i>            | 0.972 | -0.012 | 5.5    | 0.740  | 35 | 2.372 |
| 100. | <i>Psammotromus algerius</i>       | 1.067 | 0.028  | 5.2    | 0.716  | 20 | 0.683 |
| 101. | <i>Pseudemys scripta</i>           | 0.080 | -1.097 | 305    | 2.484  | 10 | 0.021 |
| 102. | <i>Pseudonaja nuchalis</i>         | 0.201 | -0.697 | 214.1  | 2.331  | 33 | 0.411 |
| 103. | <i>Ptyodactylus hasselquistii</i>  | 0.519 | -0.285 | 8.5    | 0.929  | 30 | 0.811 |
| 104. | <i>Python curtis</i>               | 0.064 | -1.194 | 2373.5 | 3.375  | 20 | 0.041 |

|      |                                   |       |        |          |        |      |       |
|------|-----------------------------------|-------|--------|----------|--------|------|-------|
| 105. | <i>Python molurus</i>             | 0.044 | -1.357 | 29777.25 | 4.474  | 20   | 0.028 |
| 106. | <i>Python regius</i>              | 0.077 | -1.114 | 787      | 2.896  | 20   | 0.049 |
| 107. | <i>Python reticulatus</i>         | 0.078 | -1.108 | 14326    | 4.156  | 20   | 0.050 |
| 108. | <i>Python sebae</i>               | 0.061 | -1.215 | 16140    | 4.208  | 20   | 0.039 |
| 109. | <i>Salvadora hexalepis</i>        | 0.380 | -0.420 | 65       | 1.813  | 30   | 0.594 |
| 110. | <i>Sauromalus hispidus</i>        | 0.155 | -0.810 | 574      | 2.759  | 20   | 0.099 |
| 111. | <i>Sauromalus obesus</i>          | 0.251 | -0.600 | 150      | 2.176  | 20   | 0.161 |
| 112. | <i>Sceloporus graciosus</i>       | 0.489 | -0.311 | 5        | 0.699  | 25   | 0.489 |
| 113. | <i>Sceloporus occidentalis</i>    | 0.600 | -0.222 | 10.105   | 1.005  | 25   | 0.600 |
| 114. | <i>Sceloporus olivaceus</i>       | 0.572 | -0.243 | 24       | 1.380  | 20   | 0.366 |
| 115. | <i>Sceloporus undulatus</i>       | 0.339 | -0.470 | 3.8      | 0.580  | 20   | 0.217 |
| 116. | <i>Sceloporus variabilis</i>      | 3.495 | 0.543  | 12.215   | 1.087  | 10   | 0.917 |
| 117. | <i>Scelotes granovii</i>          | 0.618 | -0.209 | 1.1      | 0.041  | 33   | 1.261 |
| 118. | <i>Scincella lateralis</i>        | 1.042 | 0.018  | 1        | 0.000  | 20   | 0.667 |
| 119. | <i>Scinus mitranus</i>            | 0.341 | -0.467 | 14.6     | 1.164  | 35   | 0.833 |
| 120. | <i>Sibynomorphis mikanii</i>      | 1.067 | 0.028  | 11       | 1.041  | 20   | 0.683 |
| 121. | <i>Spalerosophis cliffordi</i>    | 0.433 | -0.364 | 300      | 2.477  | 35   | 1.056 |
| 122. | <i>Sphaerodactylus beattyi</i>    | 0.800 | -0.097 | 0.4      | -0.398 | 30   | 1.250 |
| 123. | <i>Sphaerodactylus cinereus</i>   | 0.465 | -0.333 | 0.4      | -0.398 | 27   | 0.556 |
| 124. | <i>Sphaerodactylus macrolepis</i> | 0.925 | -0.034 | 0.5      | -0.301 | 30   | 1.445 |
| 125. | <i>Sphenodon punctatum</i>        | 0.172 | -0.764 | 430      | 2.633  | 25   | 0.172 |
| 126. | <i>Sphenops sepsoides</i>         | 0.281 | -0.551 | 7.4      | 0.869  | 30   | 0.439 |
| 127. | <i>Storeria dekayi</i>            | 0.576 | -0.240 | 7.2      | 0.857  | 30   | 0.900 |
| 128. | <i>Tarentola mauritanica</i>      | 0.414 | -0.383 | 6.6      | 0.820  | 35   | 1.011 |
| 129. | <i>Terrapene ornata ornata</i>    | 0.015 | -1.824 | 354      | 2.549  | 10   | 0.004 |
| 130. | <i>Thamnodyastes strigatus</i>    | 0.356 | -0.449 | 55       | 1.740  | 20   | 0.228 |
| 131. | <i>Thamnophis butleri</i>         | 0.342 | -0.466 | 19.02    | 1.279  | 25   | 0.342 |
| 132. | <i>Thamnophis proximus</i>        | 0.533 | -0.273 | 31       | 1.491  | 30   | 0.833 |
| 133. | <i>Thamnophis sirtalis</i>        | 0.128 | -0.893 | 200      | 2.301  | 29   | 0.183 |
| 134. | <i>Tiliqua rugosa</i>             | 0.328 | -0.484 | 508.6    | 2.706  | 35   | 0.800 |
| 135. | <i>Tiliqua scincoides</i>         | 0.234 | -0.631 | 493      | 2.693  | 20   | 0.150 |
| 136. | <i>Trachydosaurus rugosus</i>     | 0.261 | -0.583 | 461      | 2.664  | 20   | 0.167 |
| 137. | <i>Trogonophis weigmanni</i>      | 0.214 | -0.670 | 4.985    | 0.698  | 25   | 0.214 |
| 138. | <i>Uromastix microlepis</i>       | 0.105 | -0.979 | 289.84   | 2.462  | 20   | 0.067 |
| 139. | <i>Uta mearnsi</i>                | 0.339 | -0.470 | 14       | 1.146  | 20   | 0.217 |
| 140. | <i>Uta stansburiana</i>           | 0.572 | -0.243 | 3.625    | 0.559  | 37   | 1.667 |
| 141. | <i>Varanus albigularis</i>        | 0.353 | -0.452 | 963      | 2.984  | 35   | 0.861 |
| 142. | <i>Varanus bengalensis</i>        | 0.181 | -0.742 | 3440     | 3.537  | 30   | 0.283 |
| 143. | <i>Varanus exanthematicus</i>     | 2.743 | 0.438  | 3836     | 3.584  | 25   | 2.743 |
| 144. | <i>Varanus giganteus</i>          | 0.220 | -0.658 | 2496     | 3.397  | 25.9 | 0.238 |
| 145. | <i>Varanus gilleni</i>            | 0.371 | -0.431 | 27.5     | 1.439  | 37   | 1.083 |
| 146. | <i>Varanus gouldi</i>             | 0.208 | -0.682 | 674      | 2.829  | 20   | 0.133 |
| 147. | <i>Varanus mertensi</i>           | 0.177 | -0.752 | 904      | 2.956  | 35   | 0.433 |
| 148. | <i>Varanus panoptes</i>           | 0.227 | -0.644 | 2005     | 3.302  | 20.5 | 0.152 |
| 149. | <i>Varanus varius</i>             | 0.178 | -0.750 | 4410     | 3.644  | 30   | 0.278 |
| 150. | <i>Varnus rosenbergi</i>          | 0.300 | -0.523 | 1269.3   | 3.104  | 35   | 0.733 |
| 151. | <i>Vipera berus</i>               | 0.500 | -0.301 | 63       | 1.799  | 25   | 0.500 |
| 152. | <i>Xantusia henshawi</i>          | 0.503 | -0.298 | 3.5      | 0.544  | 15   | 0.206 |
| 153. | <i>Xantusia vigilis</i>           | 0.614 | -0.212 | 1.5      | 0.176  | 30   | 0.959 |
| 154. | <i>Xenodon guentheri</i>          | 0.303 | -0.519 | 50       | 1.699  | 20   | 0.194 |
| 155. | <i>Xenodon merremii</i>           | 0.373 | -0.428 | 502      | 2.701  | 20   | 0.239 |
| 156. | <i>Xenodon neuwiedii</i>          | 0.322 | -0.492 | 53       | 1.724  | 20   | 0.206 |

Table S5c. Standard and routine metabolic rates in fish (after [www.fishbase.org](http://www.fishbase.org))

Note: N is the number of metabolic rate values available for each species at [www.fishbase.org](http://www.fishbase.org); qWkg is the minimum of the N values.

| Species | q25Wkg                                     | Logq25Wkg | Mg     | LogMg   | TC    | qWkg | N      |     |
|---------|--------------------------------------------|-----------|--------|---------|-------|------|--------|-----|
| 1.      | <i>Abramis brama</i>                       | 0.746     | -0.127 | 102.90  | 2.012 | 18.0 | 0.5252 | 40  |
| 2.      | <i>Acanthopagrus schlegelii schlegelii</i> | 0.117     | -0.932 | 254.00  | 2.405 | 25.0 | 0.1167 | 21  |
| 3.      | <i>Acipenser gueldenstaedtii</i>           | 0.387     | -0.412 | 208.00  | 2.318 | 18.0 | 0.2723 | 8   |
| 4.      | <i>Acipenser nudiiventris</i>              | 0.714     | -0.146 | 89.00   | 1.949 | 19.0 | 0.5290 | 1   |
| 5.      | <i>Acipenser ruthenus</i>                  | 0.175     | -0.757 | 258.00  | 2.412 | 20.0 | 0.1362 | 4   |
| 6.      | <i>Acipenser stellatus</i>                 | 0.345     | -0.462 | 6500.00 | 3.813 | 20.0 | 0.2684 | 22  |
| 7.      | <i>Acipenser transmontanus</i>             | 0.019     | -1.721 | 950.00  | 2.978 | 15.0 | 0.0117 | 10  |
| 8.      | <i>Aequidens pulcher</i>                   | 0.475     | -0.323 | 5.00    | 0.699 | 25.0 | 0.4746 | 1   |
| 9.      | <i>Alburnus alburnus</i>                   | 0.729     | -0.137 | 9.00    | 0.954 | 8.0  | 0.3112 | 4   |
| 10.     | <i>Ambassis interrupta</i>                 | 0.315     | -0.502 | 5.00    | 0.699 | 25.0 | 0.3151 | 10  |
| 11.     | <i>Ameiurus melas</i>                      | 0.424     | -0.373 | 50.00   | 1.699 | 17.0 | 0.2840 | 3   |
| 12.     | <i>Ameiurus natalis</i>                    | 0.334     | -0.476 | 20.00   | 1.301 | 15.0 | 0.2023 | 6   |
| 13.     | <i>Ameiurus nebulosus</i>                  | 0.165     | -0.783 | 116.00  | 2.064 | 10.0 | 0.0778 | 90  |
| 14.     | <i>Anabas testudineus</i>                  | 0.017     | -1.770 | 27.62   | 1.441 | 28.0 | 0.0195 | 86  |
| 15.     | <i>Anarhichas minor</i>                    | 0.458     | -0.339 | 27.50   | 1.439 | 1.35 | 0.1400 | 1   |
| 16.     | <i>Anguilla anguilla</i>                   | 0.128     | -0.893 | 71.10   | 1.852 | 14.0 | 0.0739 | 151 |
| 17.     | <i>Anguilla australis australis</i>        | 0.110     | -0.959 | 700.00  | 2.845 | 20.0 | 0.0856 | 2   |
| 18.     | <i>Anguilla japonica</i>                   | 0.132     | -0.879 | 325.00  | 2.512 | 14.5 | 0.0778 | 34  |

|     |                                           |        |        |         |        |      |         |     |
|-----|-------------------------------------------|--------|--------|---------|--------|------|---------|-----|
| 19. | <i>Anguilla rostrata</i>                  | 0.135  | -0.870 | 315.00  | 2.498  | 15.0 | 0.0817  | 19  |
| 20. | <i>Anoplogaster cornuta</i>               | 0.032  | -1.495 | 36.70   | 1.565  | 5.0  | 0.0117  | 14  |
| 21. | <i>Aphanius dispar dispar</i>             | 1.940  | 0.288  | 0.56    | -0.252 | 17.0 | 1.2993  | 5   |
| 22. | <i>Arapaima gigas</i>                     | 0.084  | -1.076 | 2300.00 | 3.362  | 28.0 | 0.0973  | 35  |
| 23. | <i>Aristostomias lunifer</i>              | 0.159  | -0.799 | 21.10   | 1.324  | 5.0  | 0.0584  | 1   |
| 24. | <i>Bajacalifornia burragei</i>            | 0.085  | -1.071 | 24.90   | 1.396  | 5.0  | 0.0311  | 1   |
| 25. | <i>Balistes capriscus</i>                 | 0.476  | -0.322 | 320.00  | 2.505  | 17.5 | 0.3268  | 3   |
| 26. | <i>Bathylagus antarcticus</i>             | 0.349  | -0.457 | 27.15   | 1.434  | 0.25 | 0.1011  | 1   |
| 27. | <i>Bathylagus stilbius</i>                | 0.371  | -0.431 | 8.55    | 0.932  | 5.0  | 0.1362  | 1   |
| 28. | <i>Bathylagus wesethi</i>                 | 1.121  | 0.050  | 1.50    | 0.176  | 10.0 | 0.5290  | 1   |
| 29. | <i>Benthalbella elongata</i>              | 0.712  | -0.148 | 35.30   | 1.548  | 0.25 | 0.2062  | 1   |
| 30. | <i>Boreogadus saida</i>                   | 0.233  | -0.633 | 110.00  | 2.041  | 1.0  | 0.0700  | 7   |
| 31. | <i>Borostomias panamensis</i>             | 0.265  | -0.577 | 110.25  | 2.042  | 5.0  | 0.0973  | 2   |
| 32. | <i>Brevoortia tyrannus</i>                | 0.841  | -0.075 | 78.40   | 1.894  | 10.0 | 0.3968  | 21  |
| 33. | <i>Callionymus lyra</i>                   | 0.161  | -0.793 | 105.00  | 2.021  | 11.5 | 0.0817  | 28  |
| 34. | <i>Campostoma anomalum</i>                | 1.038  | 0.016  | 19.25   | 1.284  | 17.9 | 0.7274  | 1   |
| 35. | <i>Caranx hippos</i>                      | 1.466  | 0.166  | 38.30   | 1.583  | 14.7 | 0.8753  | 1   |
| 36. | <i>Carassius auratus auratus</i>          | 0.127  | -0.896 | 3.80    | 0.580  | 5.0  | 0.0467  | 310 |
| 37. | <i>Carassius carassius</i>                | 0.106  | -0.975 | 12.50   | 1.097  | 5.0  | 0.0389  | 32  |
| 38. | <i>Catostomus commersonii</i>             | 0.289  | -0.539 | 100.00  | 2.000  | 10.0 | 0.1362  | 48  |
| 39. | <i>Catostomus tahoensis</i>               | 0.574  | -0.241 | 43.73   | 1.641  | 8.0  | 0.2451  | 6   |
| 40. | <i>Centropristis striata</i>              | 0.389  | -0.410 | 84.00   | 1.924  | 25.0 | 0.3890  | 5   |
| 41. | <i>Chaenocephalus aceratus</i>            | 0.221  | -0.656 | 1130.00 | 3.053  | 2.0  | 0.0700  | 24  |
| 42. | <i>Channa marulius</i>                    | 0.121  | -0.917 | 93.00   | 1.968  | 30.0 | 0.1556  | 16  |
| 43. | <i>Channa orientalis</i>                  | 0.164  | -0.785 | 30.00   | 1.477  | 30.0 | 0.2101  | 52  |
| 44. | <i>Channa punctata</i>                    | 0.067  | -1.174 | 12.50   | 1.097  | 26.0 | 0.0700  | 84  |
| 45. | <i>Channa striata</i>                     | 0.130  | -0.886 | 82.00   | 1.914  | 30.0 | 0.1673  | 11  |
| 46. | <i>Channichthys rhinocerus</i>            | 0.713  | -0.147 | 200.00  | 2.301  | 5.5  | 0.2684  | 2   |
| 47. | <i>Chanos chanos</i>                      | 2.692  | 0.430  | 0.70    | -0.155 | 25.0 | 2.6919  | 56  |
| 48. | <i>Chiasmodon niger</i>                   | 0.468  | -0.330 | 76.60   | 1.884  | 2.5  | 0.1517  | 1   |
| 49. | <i>Chiloscyllium plagiosum</i>            | 0.202  | -0.695 | 880.00  | 2.944  | 23.0 | 0.1828  | 3   |
| 50. | <i>Chromis chromis</i>                    | 0.812  | -0.090 | 10.40   | 1.017  | 16.0 | 0.5174  | 4   |
| 51. | <i>Cichlasoma bimaculatum</i>             | 0.267  | -0.573 | 11.00   | 1.041  | 22.0 | 0.2295  | 38  |
| 52. | <i>Cirrhinus cirrhosus</i>                | 0.213  | -0.672 | 1821.00 | 3.260  | 21.5 | 0.1789  | 87  |
| 53. | <i>Citharichthys stigmaeus</i>            | 0.513  | -0.290 | 15.00   | 1.176  | 15.0 | 0.3112  | 1   |
| 54. | <i>Clarias batrachus</i>                  | 0.204  | -0.690 | 77.00   | 1.886  | 26.0 | 0.2140  | 9   |
| 55. | <i>Clinocottus analis</i>                 | 0.610  | -0.215 | 37.00   | 1.568  | 20.0 | 0.4746  | 1   |
| 56. | <i>Colisa fasciata</i>                    | 0.348  | -0.458 | 0.92    | -0.036 | 28.0 | 0.4046  | 42  |
| 57. | <i>Colossoma macropomum</i>               | 0.195  | -0.710 | 1760.00 | 3.246  | 25.0 | 0.1945  | 115 |
| 58. | <i>Conger conger</i>                      | 0.610  | -0.215 | 545.00  | 2.736  | 13.0 | 0.3345  | 5   |
| 59. | <i>Coregonus autumnalis</i>               | 1.309  | 0.117  | 234.00  | 2.369  | 7.2  | 0.5368  | 4   |
| 60. | <i>Coregonus fera</i>                     | 4.049  | 0.607  | 0.11    | -0.959 | 14.0 | 2.3340  | 26  |
| 61. | <i>Coregonus sardinella</i>               | 0.935  | -0.029 | 365.00  | 2.562  | 9.2  | 0.4240  | 22  |
| 62. | <i>Coryphaena equiselis</i>               | 6.114  | 0.786  | 0.03    | -1.523 | 23.0 | 5.5316  | 71  |
| 63. | <i>Coryphaena hippurus</i>                | 3.114  | 0.493  | 0.90    | -0.046 | 13.5 | 1.7505  | 1   |
| 64. | <i>Coryphaenoides armatus</i>             | 0.047  | -1.328 | 1200.00 | 3.079  | 3.0  | 0.0156  | 3   |
| 65. | <i>Cottus gobio</i>                       | 1.961  | 0.292  | 2.90    | 0.462  | 18.0 | 1.3810  | 1   |
| 66. | <i>Ctenopharyngodon idella</i>            | 0.497  | -0.304 | 16.05   | 1.205  | 22.0 | 0.4279  | 8   |
| 67. | <i>Cyclothone acclinidens</i>             | 0.281  | -0.551 | 0.87    | -0.060 | 3.0  | 0.0934  | 9   |
| 68. | <i>Cyclothone microdon</i>                | 0.309  | -0.510 | 0.78    | -0.108 | 0.25 | 0.0895  | 1   |
| 69. | <i>Cyprinodon variegatus variegatus</i>   | 0.661  | -0.180 | 2.40    | 0.380  | 25.0 | 0.6613  | 18  |
| 70. | <i>Cyprinus carpio carpio</i>             | 0.140  | -0.854 | 174.00  | 2.241  | 10.0 | 0.0661  | 208 |
| 71. | <i>Dactylopterus volitans</i>             | 14.340 | 1.157  | 0.02    | -1.699 | 23.0 | 12.9732 | 14  |
| 72. | <i>Dasyatis sabina</i>                    | 0.282  | -0.550 | 503.00  | 2.702  | 22.2 | 0.2451  | 10  |
| 73. | <i>Diaphus theta</i>                      | 1.620  | 0.210  | 2.65    | 0.423  | 5.0  | 0.5952  | 2   |
| 74. | <i>Diplodus sargus sargus</i>             | 1.275  | 0.106  | 25.75   | 1.411  | 14.0 | 0.7352  | 2   |
| 75. | <i>Dorosoma cepedianum</i>                | 0.417  | -0.380 | 87.70   | 1.943  | 13.4 | 0.2334  | 52  |
| 76. | <i>Echiichthys vipera</i>                 | 1.239  | 0.093  | 10.50   | 1.021  | 18.5 | 0.8947  | 2   |
| 77. | <i>Electrona antarctica</i>               | 0.806  | -0.094 | 7.90    | 0.898  | 0.25 | 0.2334  | 1   |
| 78. | <i>Embiotoca lateralis</i>                | 0.687  | -0.163 | 599.00  | 2.777  | 15.0 | 0.4162  | 2   |
| 79. | <i>Encheliophis homei</i>                 | 0.260  | -0.585 | 7.50    | 0.875  | 30.0 | 0.3345  | 6   |
| 80. | <i>Engraulis japonicus</i>                | 1.263  | 0.101  | 628.79  | 2.799  | 16.2 | 0.8130  | 15  |
| 81. | <i>Epinephelus akaara</i>                 | 0.175  | -0.757 | 281.00  | 2.449  | 25.0 | 0.1751  | 30  |
| 82. | <i>Erimyzon oblongus</i>                  | 0.824  | -0.084 | 25.80   | 1.412  | 18.5 | 0.5952  | 1   |
| 83. | <i>Erpetoichthys calabaricus</i>          | 0.405  | -0.393 | 27.40   | 1.438  | 27.0 | 0.4474  | 1   |
| 84. | <i>Esomus danricus</i>                    | 1.661  | 0.220  | 0.62    | -0.208 | 27.5 | 1.8828  | 20  |
| 85. | <i>Esox lucius</i>                        | 0.212  | -0.674 | 600.00  | 2.778  | 5.0  | 0.0778  | 26  |
| 86. | <i>Esox masquinongy</i>                   | 1.070  | 0.029  | 12.20   | 1.086  | 5.0  | 0.3929  | 9   |
| 87. | <i>Etheostoma blennioides</i>             | 1.189  | 0.075  | 12.35   | 1.092  | 17.5 | 0.8169  | 1   |
| 88. | <i>Euthynnus affinis</i>                  | 2.057  | 0.313  | 2260.00 | 3.354  | 24.0 | 1.9567  | 1   |
| 89. | <i>Exodon paradoxus</i>                   | 0.190  | -0.721 | 3.85    | 0.585  | 20.0 | 0.1478  | 4   |
| 90. | <i>Fundulus grandis</i>                   | 0.035  | -1.456 | 31.50   | 1.498  | 25.0 | 0.0350  | 22  |
| 91. | <i>Fundulus heteroclitus heteroclitus</i> | 0.138  | -0.860 | 9.00    | 0.954  | 5.0  | 0.0506  | 18  |
| 92. | <i>Fundulus parvipinnis</i>               | 0.030  | -1.523 | 6.00    | 0.778  | 20.0 | 0.0233  | 11  |
| 93. | <i>Fundulus similis</i>                   | 0.031  | -1.509 | 21.00   | 1.322  | 25.0 | 0.0311  | 22  |
| 94. | <i>Gadus morhua</i>                       | 0.328  | -0.484 | 6650.00 | 3.823  | 3.0  | 0.1089  | 140 |
| 95. | <i>Gadus ogac</i>                         | 0.871  | -0.060 | 180.00  | 2.255  | 0.0  | 0.2490  | 1   |
| 96. | <i>Gambusia affinis</i>                   | 1.377  | 0.139  | 0.24    | -0.620 | 10.0 | 0.6496  | 27  |
| 97. | <i>Gambusia holbrooki</i>                 | 0.303  | -0.519 | 0.30    | -0.523 | 27.0 | 0.3345  | 16  |

|      |                                         |       |        |         |        |      |        |     |
|------|-----------------------------------------|-------|--------|---------|--------|------|--------|-----|
| 98.  | <i>Gasterosteus aculeatus aculeatus</i> | 0.907 | -0.042 | 1.95    | 0.290  | 10.0 | 0.4279 | 22  |
| 99.  | <i>Genyagnus monopterygius</i>          | 0.058 | -1.237 | 164.00  | 2.215  | 17.0 | 0.0389 | 21  |
| 100. | <i>Gilchristella aestuaria</i>          | 1.046 | 0.020  | 1.44    | 0.158  | 15.0 | 0.6341 | 20  |
| 101. | <i>Gillichthys mirabilis</i>            | 0.030 | -1.523 | 16.70   | 1.223  | 20.0 | 0.0233 | 75  |
| 102. | <i>Girella nigricans</i>                | 0.475 | -0.323 | 210.00  | 2.322  | 18.0 | 0.3345 | 5   |
| 103. | <i>Glossogobius giuris</i>              | 0.126 | -0.900 | 15.00   | 1.176  | 26.0 | 0.1323 | 42  |
| 104. | <i>Gnathonemus petersii</i>             | 0.377 | -0.424 | 5.85    | 0.767  | 26.0 | 0.3968 | 1   |
| 105. | <i>Gobio gobio gobio</i>                | 1.096 | 0.040  | 17.00   | 1.230  | 12.0 | 0.5718 | 6   |
| 106. | <i>Gobionotothen gibberifrons</i>       | 0.309 | -0.510 | 470.00  | 2.672  | 0.25 | 0.0895 | 1   |
| 107. | <i>Gobius paganellus</i>                | 0.937 | -0.028 | 10.50   | 1.021  | 23.1 | 0.8519 | 1   |
| 108. | <i>Gymnocephalus cernuus</i>            | 0.825 | -0.084 | 64.80   | 1.812  | 17.0 | 0.5524 | 2   |
| 109. | <i>Gymnodraco acuticeps</i>             | 0.484 | -0.315 | 87.20   | 1.941  | -0.3 | 0.1362 | 2   |
| 110. | <i>Gymnoscopelus braueri</i>            | 0.510 | -0.292 | 11.40   | 1.057  | 0.25 | 0.1478 | 1   |
| 111. | <i>Gymnoscopelus opisthopterus</i>      | 0.430 | -0.367 | 23.55   | 1.372  | 0.25 | 0.1245 | 1   |
| 112. | <i>Harpagifer georgianus</i>            | 0.025 | -1.602 | 4.13    | 0.616  | 1.5  | 0.0078 | 1   |
| 113. | <i>Hemichromis bimaculatus</i>          | 0.751 | -0.124 | 3.00    | 0.477  | 25.0 | 0.7508 | 1   |
| 114. | <i>Heteropneustes fossilis</i>          | 0.204 | -0.690 | 45.00   | 1.653  | 18.0 | 0.1439 | 36  |
| 115. | <i>Hippocampus hippocampus</i>          | 0.712 | -0.148 | 10.00   | 1.000  | 18.0 | 0.5018 | 5   |
| 116. | <i>Hippoglossoides platessoides</i>     | 0.194 | -0.712 | 390.00  | 2.591  | 3.5  | 0.0661 | 5   |
| 117. | <i>Hoplerythrinus unitaeniatus</i>      | 0.127 | -0.896 | 243.00  | 2.386  | 28.5 | 0.1517 | 55  |
| 118. | <i>Ichthyomyzon fossor</i>              | 0.845 | -0.073 | 3.78    | 0.577  | 18.0 | 0.5952 | 1   |
| 119. | <i>Ictalurus punctatus</i>              | 0.232 | -0.635 | 825.00  | 2.916  | 18.0 | 0.1634 | 29  |
| 120. | <i>Katsuwonus pelamis</i>               | 0.881 | -0.055 | 632.00  | 2.801  | 23.5 | 0.8169 | 47  |
| 121. | <i>Kuhlia sandvicensis</i>              | 0.254 | -0.595 | 55.97   | 1.748  | 23.0 | 0.2295 | 62  |
| 122. | <i>Labeo calbasu</i>                    | 0.196 | -0.708 | 0.30    | -0.523 | 27.5 | 0.2217 | 8   |
| 123. | <i>Labeo capensis</i>                   | 0.355 | -0.450 | 357.96  | 2.554  | 8.0  | 0.1517 | 49  |
| 124. | <i>Labeo rohita</i>                     | 0.764 | -0.117 | 5.00    | 0.699  | 29.0 | 0.9336 | 10  |
| 125. | <i>Labeobarbus aeneus</i>               | 0.140 | -0.854 | 325.50  | 2.513  | 10.0 | 0.0661 | 28  |
| 126. | <i>Labrus bergylta</i>                  | 0.470 | -0.328 | 125.00  | 2.097  | 18.0 | 0.3307 | 4   |
| 127. | <i>Lagodon rhomboides</i>               | 0.226 | -0.646 | 13.50   | 1.130  | 25.0 | 0.2256 | 14  |
| 128. | <i>Lampetra fluviatilis</i>             | 0.185 | -0.733 | 1.43    | 0.155  | 4.4  | 0.0661 | 62  |
| 129. | <i>Lampetra planeri</i>                 | 0.146 | -0.836 | 2.79    | 0.446  | 5.3  | 0.0545 | 17  |
| 130. | <i>Leiostomus xanthurus</i>             | 0.218 | -0.662 | 11.10   | 1.045  | 25.0 | 0.2178 | 85  |
| 131. | <i>Lepidocephalichthys guntea</i>       | 0.573 | -0.242 | 1.27    | 0.104  | 24.0 | 0.5446 | 8   |
| 132. | <i>Lepidogalaxias salamandroides</i>    | 0.270 | -0.569 | 0.62    | -0.208 | 20.0 | 0.2101 | 31  |
| 133. | <i>Lepomis cyanellus</i>                | 0.834 | -0.079 | 10.00   | 1.000  | 15.0 | 0.5057 | 3   |
| 134. | <i>Lepomis gibbosus</i>                 | 0.244 | -0.613 | 30.00   | 1.477  | 5.0  | 0.0895 | 9   |
| 135. | <i>Lepomis macrochirus</i>              | 0.151 | -0.821 | 133.00  | 2.124  | 30.0 | 0.1945 | 250 |
| 136. | <i>Leporinus fasciatus</i>              | 0.541 | -0.267 | 3.95    | 0.597  | 25.0 | 0.5407 | 3   |
| 137. | <i>Leucaspis delineatus</i>             | 2.199 | 0.342  | 1.52    | 0.182  | 20.0 | 1.7116 | 1   |
| 138. | <i>Leuciscus cephalus</i>               | 0.719 | -0.143 | 14.00   | 1.146  | 15.0 | 0.4357 | 18  |
| 139. | <i>Leuciscus idus</i>                   | 0.212 | -0.674 | 600.00  | 2.778  | 5.0  | 0.0778 | 15  |
| 140. | <i>Leuciscus leuciscus</i>              | 2.143 | 0.331  | 9.95    | 0.998  | 16.5 | 1.4004 | 1   |
| 141. | <i>Limanda limanda</i>                  | 0.159 | -0.799 | 400.00  | 2.602  | 5.0  | 0.0584 | 7   |
| 142. | <i>Lipolagus ochotensis</i>             | 0.989 | -0.005 | 3.40    | 0.531  | 10.0 | 0.4668 | 1   |
| 143. | <i>Lipophrys pholis</i>                 | 0.549 | -0.260 | 20.20   | 1.305  | 16.0 | 0.3501 | 109 |
| 144. | <i>Liza dumerili</i>                    | 0.387 | -0.412 | 42.50   | 1.628  | 18.0 | 0.2723 | 45  |
| 145. | <i>Liza macrolepis</i>                  | 0.478 | -0.321 | 8.00    | 0.903  | 29.0 | 0.5835 | 59  |
| 146. | <i>Liza richardsonii</i>                | 0.915 | -0.039 | 39.20   | 1.593  | 13.0 | 0.5018 | 22  |
| 147. | <i>Lota lota</i>                        | 0.572 | -0.243 | 213.00  | 2.328  | 11.3 | 0.2879 | 1   |
| 148. | <i>Lutjanus campechanus</i>             | 0.469 | -0.329 | 365.50  | 2.563  | 15.0 | 0.2840 | 18  |
| 149. | <i>Lycodichthys dearborni</i>           | 0.117 | -0.932 | 44.61   | 1.649  | -1.5 | 0.0311 | 16  |
| 150. | <i>Macrogathus aculeatus</i>            | 0.233 | -0.633 | 53.00   | 1.724  | 21.0 | 0.1906 | 43  |
| 151. | <i>Melamphaes acanthomus</i>            | 0.191 | -0.719 | 17.40   | 1.241  | 5.0  | 0.0700 | 2   |
| 152. | <i>Melanocetus johnsonii</i>            | 0.288 | -0.541 | 50.55   | 1.704  | 2.5  | 0.0934 | 1   |
| 153. | <i>Melanogrammus aeglefinus</i>         | 0.280 | -0.553 | 155.90  | 2.193  | 10.0 | 0.1323 | 12  |
| 154. | <i>Melanonus zugmayeri</i>              | 0.265 | -0.577 | 31.50   | 1.498  | 5.0  | 0.0973 | 1   |
| 155. | <i>Melanostigma gelatinosum</i>         | 0.403 | -0.395 | 47.20   | 1.674  | 0.25 | 0.1167 | 1   |
| 156. | <i>Melanostigma pammelas</i>            | 0.117 | -0.932 | 10.00   | 1.000  | 3.0  | 0.0389 | 8   |
| 157. | <i>Micropterus salmoides</i>            | 0.122 | -0.914 | 178.00  | 2.250  | 15.0 | 0.0739 | 84  |
| 158. | <i>Microstomus kitt</i>                 | 0.307 | -0.513 | 229.00  | 2.360  | 5.0  | 0.1128 | 6   |
| 159. | <i>Misgurnus fossilis</i>               | 0.679 | -0.168 | 28.50   | 1.455  | 18.0 | 0.4785 | 1   |
| 160. | <i>Monopterus cuchia</i>                | 0.113 | -0.947 | 172.88  | 2.238  | 25.0 | 0.1128 | 10  |
| 161. | <i>Mugil cephalus</i>                   | 0.342 | -0.466 | 221.00  | 2.344  | 14.5 | 0.2023 | 72  |
| 162. | <i>Mugil curema</i>                     | 0.500 | -0.301 | 140.00  | 2.146  | 20.0 | 0.3890 | 12  |
| 163. | <i>Myoxocephalus octodecemspinosus</i>  | 0.330 | -0.481 | 200.00  | 2.301  | 10.0 | 0.1556 | 16  |
| 164. | <i>Myoxocephalus scorpius</i>           | 0.519 | -0.285 | 87.50   | 1.942  | 2.4  | 0.1673 | 5   |
| 165. | <i>Mystus armatus</i>                   | 0.469 | -0.329 | 9.20    | 0.964  | 30.0 | 0.6030 | 10  |
| 166. | <i>Mystus cavasius</i>                  | 0.576 | -0.240 | 45.00   | 1.653  | 29.0 | 0.7041 | 17  |
| 167. | <i>Mystus gulio</i>                     | 0.549 | -0.260 | 12.00   | 1.079  | 27.0 | 0.6068 | 2   |
| 168. | <i>Mystus vittatus</i>                  | 0.545 | -0.264 | 7.40    | 0.869  | 20.0 | 0.4240 | 60  |
| 169. | <i>Myxine glutinosa</i>                 | 0.460 | -0.337 | 38.40   | 1.584  | 7.0  | 0.1867 | 2   |
| 170. | <i>Nannobranchium regale</i>            | 0.169 | -0.772 | 2.90    | 0.462  | 5.0  | 0.0622 | 1   |
| 171. | <i>Nannobranchium ritteri</i>           | 0.625 | -0.204 | 1.80    | 0.255  | 5.0  | 0.2295 | 2   |
| 172. | <i>Naukrates ductor</i>                 | 8.888 | 0.949  | 0.07    | -1.155 | 23.0 | 8.0406 | 50  |
| 173. | <i>Notothenia coriiceps</i>             | 0.390 | -0.409 | 1000.00 | 3.000  | 0.25 | 0.1128 | 3   |
| 174. | <i>Notothenia cyanobranca</i>           | 1.194 | 0.077  | 200.00  | 2.301  | 4.5  | 0.4279 | 1   |
| 175. | <i>Notothenia rossii</i>                | 0.304 | -0.517 | 159.70  | 2.203  | 3.0  | 0.1011 | 12  |
| 176. | <i>Oligolepis acutipennis</i>           | 0.115 | -0.939 | 6.30    | 0.799  | 26.0 | 0.1206 | 12  |

|      |                                         |       |        |         |        |      |        |     |
|------|-----------------------------------------|-------|--------|---------|--------|------|--------|-----|
| 177. | <i>Oncorhynchus mykiss</i>              | 0.413 | -0.384 | 450.00  | 2.653  | 5.0  | 0.1517 | 548 |
| 178. | <i>Oncorhynchus nerka</i>               | 0.434 | -0.363 | 36.70   | 1.565  | 5.0  | 0.1595 | 87  |
| 179. | <i>Oncorhynchus tshawytscha</i>         | 1.050 | 0.021  | 26.00   | 1.415  | 16.0 | 0.6691 | 1   |
| 180. | <i>Oneirodes acanthias</i>              | 0.127 | -0.896 | 4.20    | 0.623  | 5.0  | 0.0467 | 1   |
| 181. | <i>Ophiodon elongatus</i>               | 0.186 | -0.730 | 1591.00 | 3.202  | 12.1 | 0.0973 | 16  |
| 182. | <i>Opsanus tau</i>                      | 1.999 | 0.301  | 325.00  | 2.512  | 20.0 | 1.5560 | 1   |
| 183. | <i>Oreochromis aureus</i>               | 0.244 | -0.613 | 697.00  | 2.843  | 26.0 | 0.2567 | 6   |
| 184. | <i>Oreochromis mossambicus</i>          | 0.226 | -0.646 | 144.30  | 2.159  | 16.0 | 0.1439 | 206 |
| 185. | <i>Oreochromis niloticus niloticus</i>  | 0.211 | -0.676 | 310.00  | 2.491  | 26.0 | 0.2217 | 50  |
| 186. | <i>Orthodon microlepidotus</i>          | 0.239 | -0.622 | 650.00  | 2.813  | 12.0 | 0.1245 | 22  |
| 187. | <i>Oryzias latipes</i>                  | 0.720 | -0.143 | 0.27    | -0.569 | 25.0 | 0.7197 | 59  |
| 188. | <i>Osphronemus goramy</i>               | 0.298 | -0.526 | 12.50   | 1.097  | 28.0 | 0.3462 | 2   |
| 189. | <i>Pagetopsis macropterus</i>           | 0.327 | -0.485 | 76.00   | 1.881  | 0.0  | 0.0934 | 1   |
| 190. | <i>Pagothenia borchgrevinki</i>         | 0.398 | -0.400 | 90.15   | 1.955  | 0.5  | 0.1167 | 2   |
| 191. | <i>Paranotothenia magellanica</i>       | 0.983 | -0.007 | 200.00  | 2.301  | 5.25 | 0.3657 | 2   |
| 192. | <i>Parophrys vetulus</i>                | 0.642 | -0.192 | 70.00   | 1.845  | 15.0 | 0.3890 | 1   |
| 193. | <i>Parvilux ingens</i>                  | 0.191 | -0.719 | 9.40    | 0.973  | 5.0  | 0.0700 | 1   |
| 194. | <i>Perca fluviatilis</i>                | 0.140 | -0.854 | 11.00   | 1.041  | 16.0 | 0.0895 | 17  |
| 195. | <i>Petromyzon marinus</i>               | 0.561 | -0.251 | 22.80   | 1.358  | 5.0  | 0.2062 | 7   |
| 196. | <i>Pimephales promelas</i>              | 0.732 | -0.135 | 2.00    | 0.301  | 15.0 | 0.4435 | 9   |
| 197. | <i>Platichthys flesus</i>               | 0.104 | -0.983 | 350.00  | 2.544  | 9.0  | 0.0467 | 11  |
| 198. | <i>Platichthys stellatus</i>            | 0.139 | -0.857 | 1290.00 | 3.111  | 9.0  | 0.0622 | 23  |
| 199. | <i>Plecoglossus altivelis altivelis</i> | 4.208 | 0.624  | 10.70   | 1.029  | 19.0 | 3.1159 | 1   |
| 200. | <i>Pleuronectes platessa</i>            | 0.212 | -0.674 | 288.60  | 2.460  | 5.0  | 0.0778 | 104 |
| 201. | <i>Poecilia latipinna</i>               | 0.132 | -0.879 | 5.60    | 0.748  | 25.0 | 0.1323 | 14  |
| 202. | <i>Pollachius pollachius</i>            | 1.293 | 0.112  | 870.00  | 2.940  | 18.5 | 0.9336 | 2   |
| 203. | <i>Pomadasys commersonii</i>            | 0.289 | -0.539 | 2627.00 | 3.419  | 15.0 | 0.1751 | 30  |
| 204. | <i>Pomoxis annularis</i>                | 0.518 | -0.286 | 11.50   | 1.061  | 17.4 | 0.3540 | 1   |
| 205. | <i>Poromitra crassiceps</i>             | 0.169 | -0.772 | 17.10   | 1.233  | 5.0  | 0.0622 | 2   |
| 206. | <i>Protopterus annectens annectens</i>  | 0.242 | -0.616 | 368.00  | 2.566  | 30.0 | 0.3112 | 19  |
| 207. | <i>Psenes whiteleggii</i>               | 4.497 | 0.653  | 1.30    | 0.114  | 13.5 | 2.5285 | 1   |
| 208. | <i>Psetta maxima</i>                    | 0.732 | -0.135 | 320.00  | 2.505  | 15.0 | 0.4435 | 31  |
| 209. | <i>Pseudobathylagus milleri</i>         | 0.169 | -0.772 | 41.10   | 1.614  | 5.0  | 0.0622 | 1   |
| 210. | <i>Pseudochaenichthys georgianus</i>    | 0.531 | -0.275 | 35.70   | 1.553  | 0.5  | 0.1556 | 2   |
| 211. | <i>Pseudopleuronectes americanus</i>    | 0.030 | -1.523 | 26.15   | 1.417  | 12.0 | 0.0156 | 68  |
| 212. | <i>Pterophyllum scalare</i>             | 0.307 | -0.513 | 19.03   | 1.279  | 25.0 | 0.3073 | 31  |
| 213. | <i>Rhinogobiops nicholsii</i>           | 0.199 | -0.701 | 4.04    | 0.606  | 15.0 | 0.1206 | 21  |
| 214. | <i>Rhodeus amarus</i>                   | 1.184 | 0.073  | 0.71    | -0.149 | 16.0 | 0.7547 | 1   |
| 215. | <i>Rhodeus sericeus</i>                 | 1.365 | 0.135  | 3.00    | 0.477  | 12.0 | 0.7119 | 3   |
| 216. | <i>Rutilus rutilus</i>                  | 0.684 | -0.165 | 27.00   | 1.431  | 8.0  | 0.2918 | 11  |
| 217. | <i>Sagamichthys abei</i>                | 0.244 | -0.613 | 5.70    | 0.756  | 5.0  | 0.0895 | 1   |
| 218. | <i>Salmo salar</i>                      | 0.556 | -0.255 | 25.00   | 1.398  | 7.0  | 0.2256 | 48  |
| 219. | <i>Salmo trutta fario</i>               | 0.478 | -0.321 | 350.00  | 2.544  | 10.0 | 0.2256 | 8   |
| 220. | <i>Salmo trutta trutta</i>              | 0.363 | -0.440 | 575.00  | 2.760  | 10.0 | 0.1712 | 52  |
| 221. | <i>Salvelinus alpinus alpinus</i>       | 0.513 | -0.290 | 210.00  | 2.322  | 15.0 | 0.3112 | 2   |
| 222. | <i>Salvelinus fontinalis</i>            | 0.181 | -0.742 | 690.00  | 2.839  | 10.0 | 0.0856 | 147 |
| 223. | <i>Salvelinus namaycush</i>             | 0.197 | -0.706 | 82.80   | 1.918  | 9.2  | 0.0895 | 117 |
| 224. | <i>Sander lucioperca</i>                | 0.318 | -0.498 | 600.00  | 2.778  | 5.0  | 0.1167 | 8   |
| 225. | <i>Sander vitreus</i>                   | 0.325 | -0.488 | 291.00  | 2.464  | 20.0 | 0.2529 | 35  |
| 226. | <i>Sarda chiliensis lineolata</i>       | 7.794 | 0.892  | 2530.00 | 3.403  | 22.0 | 6.7064 | 1   |
| 227. | <i>Sarotherodon galilaeus galilaeus</i> | 0.259 | -0.587 | 283.00  | 2.452  | 26.0 | 0.2723 | 6   |
| 228. | <i>Scardinius erythrophthalmus</i>      | 1.084 | 0.035  | 53.00   | 1.724  | 20.0 | 0.8441 | 1   |
| 229. | <i>Scopelogadus tristis</i>             | 0.138 | -0.860 | 49.80   | 1.697  | 5.0  | 0.0506 | 1   |
| 230. | <i>Scopelogadus mizolepis mizolepis</i> | 0.212 | -0.674 | 3.60    | 0.556  | 5.0  | 0.0778 | 1   |
| 231. | <i>Scophthalmus rhombus</i>             | 0.700 | -0.155 | 145.00  | 2.161  | 18.5 | 0.5057 | 3   |
| 232. | <i>Scorpaena porcus</i>                 | 0.330 | -0.481 | 50.00   | 1.699  | 20.0 | 0.2567 | 3   |
| 233. | <i>Scyliorhinus canicula</i>            | 0.211 | -0.676 | 857.00  | 2.933  | 7.0  | 0.0856 | 25  |
| 234. | <i>Scyliorhinus stellaris</i>           | 0.022 | -1.658 | 2530.00 | 3.403  | 18.3 | 0.0156 | 14  |
| 235. | <i>Sebastes diploproa</i>               | 0.965 | -0.015 | 2.00    | 0.301  | 10.0 | 0.4551 | 19  |
| 236. | <i>Sebastolobus altivelis</i>           | 0.041 | -1.387 | 198.00  | 2.297  | 5.7  | 0.0156 | 6   |
| 237. | <i>Seriola quinqueradiata</i>           | 0.770 | -0.114 | 989.00  | 2.995  | 19.2 | 0.5757 | 1   |
| 238. | <i>Serranus scriba</i>                  | 1.013 | 0.006  | 4.10    | 0.613  | 16.0 | 0.6457 | 1   |
| 239. | <i>Solea solea</i>                      | 0.709 | -0.149 | 185.00  | 2.267  | 14.0 | 0.4085 | 6   |
| 240. | <i>Sparus aurata</i>                    | 1.121 | 0.050  | 78.00   | 1.892  | 18.0 | 0.7897 | 2   |
| 241. | <i>Spinachia spinachia</i>              | 1.955 | 0.291  | 0.30    | -0.523 | 18.0 | 1.3771 | 2   |
| 242. | <i>Squalus acanthias</i>                | 0.182 | -0.740 | 1812.00 | 3.258  | 9.0  | 0.0817 | 23  |
| 243. | <i>Stenobranchius leucopsarus</i>       | 0.635 | -0.197 | 4.30    | 0.633  | 5.0  | 0.2334 | 2   |
| 244. | <i>Stomias atriventer</i>               | 0.478 | -0.321 | 9.30    | 0.968  | 10.0 | 0.2256 | 1   |
| 245. | <i>Stomias danae</i>                    | 0.504 | -0.298 | 13.80   | 1.140  | 2.5  | 0.1634 | 1   |
| 246. | <i>Symbolophorus californiensis</i>     | 0.911 | -0.040 | 0.80    | -0.097 | 5.0  | 0.3345 | 1   |
| 247. | <i>Synbranchus marmoratus</i>           | 0.140 | -0.854 | 151.00  | 2.179  | 25.0 | 0.1400 | 18  |
| 248. | <i>Syngnathus acus</i>                  | 1.045 | 0.019  | 7.60    | 0.881  | 18.5 | 0.7547 | 2   |
| 249. | <i>Tarletonbeania crenularis</i>        | 1.248 | 0.096  | 3.29    | 0.517  | 8.0  | 0.5329 | 2   |
| 250. | <i>Tautoglabrus adspersus</i>           | 0.710 | -0.149 | 50.00   | 1.699  | 20.0 | 0.5524 | 2   |
| 251. | <i>Theragra chalcogramma</i>            | 0.427 | -0.370 | 70.00   | 1.845  | 1.0  | 0.1284 | 23  |
| 252. | <i>Thorichthys meeki</i>                | 0.319 | -0.496 | 15.00   | 1.176  | 25.0 | 0.3190 | 2   |
| 253. | <i>Thymallus arcticus arcticus</i>      | 0.757 | -0.121 | 283.00  | 2.452  | 4.0  | 0.2645 | 16  |
| 254. | <i>Tilapia rendalli</i>                 | 0.488 | -0.312 | 50.00   | 1.699  | 17.0 | 0.3268 | 7   |
| 255. | <i>Tilapia zillii</i>                   | 0.218 | -0.662 | 315.00  | 2.498  | 26.0 | 0.2295 | 30  |



|      |                                    |       |        |        |        |      |        |    |
|------|------------------------------------|-------|--------|--------|--------|------|--------|----|
| 256. | <i>Tinca tinca</i>                 | 0.379 | -0.421 | 541.00 | 2.733  | 16.0 | 0.2412 | 21 |
| 257. | <i>Torpedo marmorata</i>           | 0.134 | -0.873 | 448.00 | 2.651  | 16.0 | 0.0856 | 3  |
| 258. | <i>Torpedo torpedo</i>             | 0.417 | -0.380 | 315.00 | 2.498  | 15.0 | 0.2529 | 2  |
| 259. | <i>Trematomus bernacchii</i>       | 0.176 | -0.754 | 55.20  | 1.742  | 0.1  | 0.0506 | 2  |
| 260. | <i>Trematomus hansonii</i>         | 0.939 | -0.027 | 145.00 | 2.161  | -0.9 | 0.2567 | 1  |
| 261. | <i>Trematomus pennellii</i>        | 0.626 | -0.203 | 183.00 | 2.262  | -0.9 | 0.1712 | 1  |
| 262. | <i>Trichogaster trichopterus</i>   | 0.588 | -0.231 | 7.97   | 0.901  | 27.0 | 0.6496 | 3  |
| 263. | <i>Triphoturus mexicanus</i>       | 0.381 | -0.419 | 1.15   | 0.061  | 5.0  | 0.1400 | 2  |
| 264. | <i>Typhlogobius californiensis</i> | 0.013 | -1.886 | 3.54   | 0.549  | 15.0 | 0.0078 | 34 |
| 265. | <i>Xiphophorus hellerii</i>        | 0.833 | -0.079 | 2.00   | 0.301  | 25.0 | 0.8325 | 2  |
| 266. | <i>Zoarces viviparus</i>           | 0.763 | -0.117 | 0.29   | -0.538 | 5.0  | 0.2801 | 8  |

---
