# Supplementary material
Source: PubMed Central journal article supplement (PMC2579366)
Supplement: 0802148105_DS6_PDF.pdf [file 0802148105_DS6_PDF.pdf]

## Dataset S6. Basal metabolic rates in birds

McKechnie & Wolf (2004, Table A1) analyzed whole-body basal metabolic rates  $Q$  ( $W \text{ ind}^{-1}$ ) as compiled by Reynolds & Lee (1996) for 254 bird species, to find that in 42 cases the conditions for measurements of basal metabolic rate had not been met. Those 42 values were not analyzed in our study. Additionally, McKechnie & Wolf (2004, Table A2) compiled literature data on basal metabolic rate in 60 bird species.

In some cases where no sufficient details were given in the published study, McKechnie & Wolf (2004) contacted the authors to ensure that basal metabolic rate conditions were strictly met. Most data of V. Gavrilov (Gavrilov 1974; Kendeigh, Dol'nik & Gavrilov 1977, ~60 species), who had not been contacted, were presented in Table A1 of McKechnie & Wolf (2004) as having an unknown or small ( $n < 3$ ) number of individuals measured.

Below in Table **S6a** the following data are presented. 314 values from McKechnie & Wolf (2004) (254-42+60) were pooled with 113 values of basal metabolic rate of 113 bird species measured by V. Gavrilov. As no sufficient details about the data of V. Gavrilov are present in the international literature, these data are provided below in a separate Table **S6b** with a detailed description of the measurement procedure, the number of individuals studied, time and season of measurements and reference publications.

In the resulting compilation of 385 values, some species were represented twice, like where McKechnie & Wolf (2004) cited the work of Gavrilov (1974) or Kendeigh, Dol'nik & Gavrilov (1977), or where two or more studies investigated one and the same species. In the former case the original value provided by V. Gavrilov in Table **S6b** was taken. In the latter case the lowest value for the species was chosen. This yielded a total of 321 BMR values for 321 species that are presented in Table **S6a**. These values were used in the analyses presented in Table 1 and Figures 1-3 in the paper.

### References:

- Gavrilov V.M. (1974) Sezonnnye i sutochnnye izmeneniya urovnya standartnogo metabolizma u vorob'inykh ptits. Pp. 134-136 in R.L. Beme and V.E. Flint, eds. Materialy. VI. Vsesoyuznoi Ornitologicheskoi Konferentsii, Moskva, 1–5 fevralya 1974 goda. Izdatel'stvo Moskovskogo Universiteta, Moskva.
- Kendeigh S.C., Dol'nik V.R., Gavrilov V.M. (1977) Avian energetics. Pp. 129–204 in J. Pinowski and S.C. Kendeigh, eds. Granivorous Birds in Ecosystems. Cambridge University Press, Cambridge.
- McKechnie A.E., Wolf B.O. (2004) The allometry of avian basal metabolic rate: good predictions need good data. *Physiological and Biochemical Zoology* 77: 502-521.
- Reynolds P.S., Lee, R.M. (1996) Phylogenetic analysis of avian energetics: passerines and non-passerines do not differ. *American Naturalist* 147: 735-759.

Table **S6a**. Basal metabolic rate in birds

Notations: qWkg — mass-specific basal metabolic rate, W kg<sup>-1</sup>; LogqWkg — decimal logarithm of qWkg; Mg — body mass, g; LogMg — decimal logarithm of Mg; Src — source of data, G: experimental data of V. Gavrilov (Table **S6b**); MW: data compiled from the literature by McKechnie & Wolf (2004).

| Species                                | qWkg | LogqWkg | Mg    | LogMg | Src |
|----------------------------------------|------|---------|-------|-------|-----|
| 1. <i>Acanthis cannabina</i>           | 20.1 | 1.302   | 16.9  | 1.228 | G   |
| 2. <i>Acanthis flammea</i>             | 20.4 | 1.310   | 14.0  | 1.146 | G   |
| 3. <i>Acanthorhynchus tenuirostris</i> | 25.7 | 1.409   | 9.7   | 0.987 | MW  |
| 4. <i>Accipiter nisus</i>              | 7.0  | 0.848   | 135   | 2.130 | G   |
| 5. <i>Acrocephalus palustris</i>       | 18.9 | 1.276   | 10.8  | 1.033 | G   |
| 6. <i>Acridotheres cristatellus</i>    | 11.0 | 1.042   | 109.4 | 2.039 | MW  |
| 7. <i>Acrocephalus arundinaceus</i>    | 11.7 | 1.069   | 21.9  | 1.340 | MW  |
| 8. <i>Acrocephalus bistrigiceps</i>    | 16.6 | 1.220   | 7.9   | 0.898 | MW  |
| 9. <i>Acrocephalus palustris</i>       | 18.8 | 1.274   | 10.8  | 1.033 | MW  |
| 10. <i>Acrocephalus schoenobaenus</i>  | 18.9 | 1.277   | 11.5  | 1.061 | G   |
| 11. <i>Aegithalos caudatus</i>         | 22.4 | 1.350   | 8.9   | 0.949 | G   |
| 12. <i>Aegolius acadicus</i>           | 5.3  | 0.722   | 124   | 2.093 | MW  |
| 13. <i>Aethopyga christinae</i>        | 22.7 | 1.356   | 5.2   | 0.716 | MW  |
| 14. <i>Agapornis fisheri</i>           | 9.3  | 0.969   | 56.7  | 1.754 | G   |
| 15. <i>Agapornis roseicollis</i>       | 9.6  | 0.983   | 48.4  | 1.685 | G   |
| 16. <i>Agelaius phoeniceus</i>         | 14.7 | 1.167   | 56.7  | 1.754 | MW  |
| 17. <i>Agleactis cupripennis</i>       | 35.0 | 1.544   | 7.2   | 0.857 | MW  |
| 18. <i>Aix sponsa</i>                  | 5.0  | 0.701   | 448   | 2.651 | G   |
| 19. <i>Alaemon alaudipes</i>           | 11.3 | 1.054   | 37.7  | 1.576 | MW  |
| 20. <i>Alauda arvensis</i>             | 22.8 | 1.357   | 31.7  | 1.501 | MW  |
| 21. <i>Alcedo atthis</i>               | 11.0 | 1.043   | 34.3  | 1.535 | G   |
| 22. <i>Alectoris graeca</i>            | 4.0  | 0.602   | 633   | 2.801 | G   |
| 23. <i>Alophoixus bres</i>             | 10.1 | 1.005   | 35    | 1.544 | MW  |
| 24. <i>Amadina erythrocephala</i>      | 9.5  | 0.978   | 22.4  | 1.350 | MW  |
| 25. <i>Amadina fasciata</i>            | 12.4 | 1.095   | 17.2  | 1.236 | MW  |
| 26. <i>Ammodramus savannarum</i>       | 12.9 | 1.111   | 13.8  | 1.140 | MW  |
| 27. <i>Amphispiza bilineata</i>        | 17.0 | 1.230   | 11.6  | 1.064 | MW  |
| 28. <i>Anas acuta</i>                  | 6.1  | 0.782   | 721   | 2.858 | MW  |
| 29. <i>Anas penelope</i>               | 3.9  | 0.592   | 723   | 2.859 | G   |
| 30. <i>Anas platyrhynchos</i>          | 4.0  | 0.601   | 1020  | 3.009 | G   |
| 31. <i>Anas strepera</i>               | 7.8  | 0.894   | 791   | 2.898 | MW  |
| 32. <i>Anhinga rufa</i> (anhinga)      | 3.1  | 0.487   | 1040  | 3.017 | MW  |
| 33. <i>Anser anser</i>                 | 3.3  | 0.524   | 3250  | 3.512 | G   |
| 34. <i>Anthracothorax nigricollis</i>  | 39.6 | 1.598   | 7.7   | 0.886 | MW  |
| 35. <i>Anthus campestris</i>           | 17.6 | 1.245   | 21.8  | 1.338 | G   |
| 36. <i>Anthus pratensis</i>            | 15.9 | 1.201   | 18.9  | 1.276 | MW  |
| 37. <i>Anthus trivialis</i>            | 17.2 | 1.236   | 19.7  | 1.294 | G   |
| 38. <i>Aptenodytes patagonica</i>      | 2.0  | 0.298   | 11080 | 4.045 | G   |
| 39. <i>Apteryx australis</i>           | 1.7  | 0.229   | 2380  | 3.377 | MW  |
| 40. <i>Apteryx haasti</i>              | 1.7  | 0.232   | 2450  | 3.389 | MW  |
| 41. <i>Apteryx owenii</i>              | 1.9  | 0.276   | 1096  | 3.040 | MW  |
| 42. <i>Apus apus</i>                   | 9.7  | 0.988   | 44.9  | 1.652 | G   |
| 43. <i>Arachnothera longirostra</i>    | 14.5 | 1.163   | 13    | 1.114 | MW  |
| 44. <i>Ardea herodias</i>              | 3.3  | 0.520   | 1870  | 3.272 | MW  |
| 45. <i>Arenaria interpres</i>          | 10.2 | 1.010   | 90    | 1.954 | MW  |
| 46. <i>Asio flammeus</i>               | 3.2  | 0.501   | 406   | 2.609 | MW  |
| 47. <i>Asio otus</i>                   | 3.8  | 0.578   | 252   | 2.401 | MW  |
| 48. <i>Authus pratensis</i>            | 15.9 | 1.202   | 18.9  | 1.276 | G   |
| 49. <i>Barnardius zonarius</i>         | 5.2  | 0.719   | 137   | 2.137 | MW  |
| 50. <i>Bombycilla garrulus</i>         | 13.2 | 1.120   | 72.5  | 1.860 | G   |
| 51. <i>Bonasa umbellus</i>             | 3.7  | 0.568   | 644   | 2.809 | MW  |
| 52. <i>Botaurus lentiginosus</i>       | 4.5  | 0.655   | 600   | 2.778 | MW  |
| 53. <i>Bubo virginianus</i>            | 3.6  | 0.557   | 1450  | 3.161 | MW  |

|      |                                      |      |       |        |       |    |
|------|--------------------------------------|------|-------|--------|-------|----|
| 54.  | <i>Buteo buteo</i>                   | 3.7  | 0.570 | 1012   | 3.005 | MW |
| 55.  | <i>Buteo lineatus</i>                | 3.2  | 0.506 | 658    | 2.818 | MW |
| 56.  | <i>Cacactua tenuirostris</i>         | 5.8  | 0.760 | 549.9  | 2.740 | MW |
| 57.  | <i>Cacatua galerita</i>              | 4.4  | 0.644 | 776.1  | 2.890 | MW |
| 58.  | <i>Cacomantis variolosus</i>         | 5.1  | 0.706 | 23.8   | 1.377 | MW |
| 59.  | <i>Calidris canutus</i>              | 6.8  | 0.831 | 130    | 2.114 | MW |
| 60.  | <i>Callipepla gambelii</i>           | 6.0  | 0.777 | 126.1  | 2.101 | MW |
| 61.  | <i>Caprimulgus europaeus</i>         | 8.3  | 0.921 | 77.4   | 1.889 | G  |
| 62.  | <i>Cardinalis cardinalis</i>         | 12.3 | 1.090 | 41     | 1.613 | MW |
| 63.  | <i>Cardinalis sinuata</i>            | 12.3 | 1.088 | 32     | 1.505 | MW |
| 64.  | <i>Carduelis carduelis</i>           | 21.1 | 1.325 | 16.5   | 1.217 | G  |
| 65.  | <i>Carduelis pinus</i>               | 20.8 | 1.318 | 14     | 1.146 | MW |
| 66.  | <i>Carduelis tristis</i>             | 24.6 | 1.390 | 13.6   | 1.134 | MW |
| 67.  | <i>Carpodacus cassinii</i>           | 12.4 | 1.092 | 27.4   | 1.438 | MW |
| 68.  | <i>Carpodacus erythrinus</i>         | 16.6 | 1.220 | 21.6   | 1.334 | G  |
| 69.  | <i>Carpodacus mexicanus</i>          | 15.2 | 1.182 | 20.4   | 1.310 | MW |
| 70.  | <i>Casurarius bennetti</i>           | 1.4  | 0.152 | 17600  | 4.246 | MW |
| 71.  | <i>Catharactus skua</i>              | 4.9  | 0.690 | 970    | 2.987 | MW |
| 72.  | <i>Centropus senegalensis</i>        | 8.6  | 0.935 | 175    | 2.243 | MW |
| 73.  | <i>Certhilauda erythrochlamys</i>    | 15.1 | 1.179 | 27.3   | 1.436 | MW |
| 74.  | <i>Chalcophaps inidica</i>           | 6.4  | 0.806 | 124    | 2.093 | MW |
| 75.  | <i>Charadius dubius</i>              | 10.9 | 1.038 | 44     | 1.643 | G  |
| 76.  | <i>Chauna chavaria</i>               | 2.6  | 0.419 | 2620   | 3.418 | MW |
| 77.  | <i>Chloris chloris</i>               | 16.8 | 1.226 | 28.2   | 1.450 | G  |
| 78.  | <i>Chloropsis sonnerati</i>          | 9.5  | 0.979 | 39.7   | 1.599 | MW |
| 79.  | <i>Chlorostilbon mellisugus</i>      | 50.0 | 1.699 | 2.9    | 0.462 | MW |
| 80.  | <i>Chordeiles minor</i>              | 6.1  | 0.787 | 72     | 1.857 | MW |
| 81.  | <i>Cinclus mexicanus</i>             | 9.2  | 0.962 | 50.2   | 1.701 | MW |
| 82.  | <i>Coccothraustes coccothraustes</i> | 14.5 | 1.160 | 48.3   | 1.684 | G  |
| 83.  | <i>Coereba flaveola</i>              | 21.5 | 1.332 | 10     | 1.000 | MW |
| 84.  | <i>Coleus monedula</i>               | 7.3  | 0.861 | 209.0  | 2.320 | G  |
| 85.  | <i>Colinus virginianus</i>           | 5.7  | 0.759 | 194    | 2.288 | MW |
| 86.  | <i>Colius castanotus</i>             | 15.0 | 1.176 | 69     | 1.839 | MW |
| 87.  | <i>Colius colius</i>                 | 5.0  | 0.703 | 35.1   | 1.545 | MW |
| 88.  | <i>Colius striatus</i>               | 4.6  | 0.665 | 51     | 1.708 | MW |
| 89.  | <i>Columba leucomela</i>             | 5.3  | 0.728 | 456    | 2.659 | MW |
| 90.  | <i>Columba livia</i>                 | 4.5  | 0.654 | 368    | 2.566 | G  |
| 91.  | <i>Columba palumbus</i>              | 4.0  | 0.604 | 493    | 2.693 | G  |
| 92.  | <i>Columba unicincta</i>             | 5.4  | 0.732 | 318    | 2.502 | MW |
| 93.  | <i>Contopus virens</i>               | 18.5 | 1.267 | 13.9   | 1.143 | MW |
| 94.  | <i>Copsychus saularis</i>            | 6.9  | 0.840 | 33.5   | 1.525 | MW |
| 95.  | <i>Cornus ruficollis</i>             | 5.1  | 0.712 | 660.0  | 2.820 | G  |
| 96.  | <i>Corvus brachyrhynchos</i>         | 8.5  | 0.931 | 384.8  | 2.585 | MW |
| 97.  | <i>Corvus corax</i>                  | 4.6  | 0.661 | 1203.0 | 3.080 | G  |
| 98.  | <i>Corvus corone cornix</i>          | 6.4  | 0.807 | 518.0  | 2.714 | G  |
| 99.  | <i>Corvus frugilegus</i>             | 6.7  | 0.827 | 390.0  | 2.591 | G  |
| 100. | <i>Coturnix chinensis</i>            | 8.2  | 0.914 | 44.9   | 1.652 | MW |
| 101. | <i>Coturnix coturnix</i>             | 7.6  | 0.881 | 109    | 2.037 | G  |
| 102. | <i>Coturnix japonica</i>             | 8.5  | 0.930 | 115    | 2.061 | MW |
| 103. | <i>Coturnix pectoralis</i>           | 6.6  | 0.821 | 95.8   | 1.981 | MW |
| 104. | <i>Crax alberti</i>                  | 2.4  | 0.371 | 2800   | 3.447 | MW |
| 105. | <i>Crax daubentoni</i>               | 2.6  | 0.409 | 2800   | 3.447 | MW |
| 106. | <i>Crex crex</i>                     | 8.2  | 0.915 | 96     | 1.982 | G  |
| 107. | <i>Cuculus canorus</i>               | 7.5  | 0.876 | 111.6  | 2.048 | G  |
| 108. | <i>Cyanocitta cristata</i>           | 10.3 | 1.013 | 80.8   | 1.907 | MW |
| 109. | <i>Cygnus buccinator</i>             | 2.3  | 0.362 | 8800   | 3.944 | MW |
| 110. | <i>Dendragapus obscurus</i>          | 4.4  | 0.642 | 1131   | 3.053 | MW |
| 111. | <i>Dendrocopus major</i>             | 8.9  | 0.950 | 117.0  | 2.068 | G  |
| 112. | <i>Dendroica coronata</i>            | 16.4 | 1.216 | 11.5   | 1.061 | MW |
| 113. | <i>Dendroica dominica</i>            | 16.3 | 1.213 | 9.8    | 0.991 | MW |
| 114. | <i>Dendroica palmarum</i>            | 15.8 | 1.199 | 9.8    | 0.991 | MW |
| 115. | <i>Dendroica pinus</i>               | 14.9 | 1.174 | 12     | 1.079 | MW |
| 116. | <i>Diomedea chrysostoma</i>          | 2.3  | 0.355 | 3753   | 3.574 | MW |

|      |                                                            |      |       |       |       |    |
|------|------------------------------------------------------------|------|-------|-------|-------|----|
| 117. | <i>Diomedea exulans</i>                                    | 2.5  | 0.398 | 8130  | 3.910 | MW |
| 118. | <i>Diomedea immutabilis</i>                                | 3.0  | 0.471 | 2522  | 3.402 | MW |
| 119. | <i>Emberiza citrinella</i>                                 | 16.3 | 1.212 | 26.8  | 1.428 | G  |
| 120. | <i>Emberiza hortulana</i>                                  | 15.1 | 1.179 | 27.0  | 1.431 | G  |
| 121. | <i>Emberiza schoeniclus</i>                                | 17.1 | 1.233 | 17.6  | 1.246 | G  |
| 122. | <i>Empidonax virescens</i>                                 | 14.6 | 1.163 | 12.3  | 1.090 | MW |
| 123. | <i>Eolophus roseicapillus</i>                              | 4.6  | 0.667 | 268.7 | 2.429 | MW |
| 124. | <i>Eremalauda dunni</i>                                    | 13.5 | 1.130 | 20.6  | 1.314 | MW |
| 125. | <i>Eremophila alpestris</i>                                | 11.9 | 1.076 | 26    | 1.415 | MW |
| 126. | <i>Erithacus rubecula</i>                                  | 16.0 | 1.204 | 17.6  | 1.246 | G  |
| 127. | <i>Estrilda melpoda</i>                                    | 17.5 | 1.242 | 7.5   | 0.875 | MW |
| 128. | <i>Estrilda troglodytes</i>                                | 20.1 | 1.302 | 7.5   | 0.875 | G  |
| 129. | <i>Eudocimus albus</i> (Guara alba)                        | 4.4  | 0.641 | 940   | 2.973 | MW |
| 130. | <i>Eudynamis scolopacea</i>                                | 8.8  | 0.942 | 188   | 2.274 | MW |
| 131. | <i>Eudytes chrysolophus</i>                                | 2.2  | 0.349 | 3870  | 3.588 | G  |
| 132. | <i>Eudytes cristatus</i>                                   | 2.5  | 0.399 | 2330  | 3.367 | G  |
| 133. | <i>Eudiptula minor</i>                                     | 3.9  | 0.590 | 960   | 2.982 | MW |
| 134. | <i>Eurostopodus argus</i> ( <i>Eurostopodus guttatus</i> ) | 4.6  | 0.665 | 88    | 1.944 | MW |
| 135. | <i>Excalfactoria chinensis</i>                             | 9.2  | 0.966 | 44    | 1.643 | G  |
| 136. | <i>Falco sparverius</i>                                    | 7.2  | 0.858 | 117   | 2.068 | MW |
| 137. | <i>Falco subbuteo</i>                                      | 6.2  | 0.795 | 208   | 2.318 | G  |
| 138. | <i>Falco tinnunculus</i>                                   | 5.9  | 0.772 | 131   | 2.117 | G  |
| 139. | <i>Ficedula hypoleuca</i>                                  | 19.9 | 1.299 | 11.7  | 1.068 | G  |
| 140. | <i>Fregata magnificens</i>                                 | 2.6  | 0.411 | 1078  | 3.033 | MW |
| 141. | <i>Fringilla coelebs</i>                                   | 17.7 | 1.249 | 21.0  | 1.322 | G  |
| 142. | <i>Fringilla montifringilla</i>                            | 18.2 | 1.261 | 21.0  | 1.322 | G  |
| 143. | <i>Fulica atra</i>                                         | 5.0  | 0.695 | 412   | 2.615 | G  |
| 144. | <i>Gallus gallus</i>                                       | 2.2  | 0.346 | 2710  | 3.433 | MW |
| 145. | <i>Garrulus glandarius</i>                                 | 9.1  | 0.957 | 153.0 | 2.185 | G  |
| 146. | <i>Geococcyx californianus</i>                             | 5.1  | 0.711 | 284.7 | 2.454 | MW |
| 147. | <i>Geopelia cuneata</i>                                    | 6.8  | 0.834 | 39    | 1.591 | MW |
| 148. | <i>Geopelia placida</i>                                    | 6.8  | 0.834 | 52    | 1.716 | MW |
| 149. | <i>Geophaps plumifera</i>                                  | 4.9  | 0.687 | 81    | 1.908 | MW |
| 150. | <i>Geophaps smithii</i>                                    | 4.4  | 0.644 | 198   | 2.297 | MW |
| 151. | <i>Glaucidium cuculoides</i>                               | 5.3  | 0.726 | 163   | 2.212 | MW |
| 152. | <i>Glaucidium gnoma</i>                                    | 8.2  | 0.912 | 54    | 1.732 | MW |
| 153. | <i>Grus canadensis</i>                                     | 2.1  | 0.321 | 3890  | 3.590 | MW |
| 154. | <i>Grus paradisea</i>                                      | 2.6  | 0.422 | 4030  | 3.605 | MW |
| 155. | <i>Gypaetus barbatus</i>                                   | 2.2  | 0.338 | 5070  | 3.705 | MW |
| 156. | <i>Haematopus ostralegus</i>                               | 5.3  | 0.720 | 554   | 2.744 | MW |
| 157. | <i>Himatione sanguinea</i>                                 | 22.2 | 1.347 | 13.5  | 1.130 | MW |
| 158. | <i>Hippolais icterina</i>                                  | 20.2 | 1.305 | 12.5  | 1.097 | G  |
| 159. | <i>Hirundo rustica</i>                                     | 16.4 | 1.214 | 18.4  | 1.265 | G  |
| 160. | <i>Hirundo tahitica</i>                                    | 12.7 | 1.104 | 14.1  | 1.149 | MW |
| 161. | <i>Icterus galbula</i>                                     | 13.4 | 1.128 | 37.5  | 1.574 | MW |
| 162. | <i>Jabiru mycteria</i>                                     | 2.4  | 0.382 | 5470  | 3.738 | MW |
| 163. | <i>Junco hyemalis</i>                                      | 16.4 | 1.215 | 18    | 1.255 | MW |
| 164. | <i>Lagopus lagopus</i>                                     | 5.1  | 0.705 | 567   | 2.754 | G  |
| 165. | <i>Lagopus leucurus</i>                                    | 7.2  | 0.860 | 326   | 2.513 | MW |
| 166. | <i>Lanius collurio</i>                                     | 14.2 | 1.152 | 27.0  | 1.431 | G  |
| 167. | <i>Lanius excubitor</i>                                    | 11.2 | 1.051 | 72.4  | 1.860 | G  |
| 168. | <i>Larus argentatus</i>                                    | 4.8  | 0.682 | 1000  | 3.000 | MW |
| 169. | <i>Larus atricilla</i>                                     | 6.8  | 0.833 | 275.6 | 2.440 | MW |
| 170. | <i>Larus canus</i>                                         | 5.2  | 0.718 | 431   | 2.634 | G  |
| 171. | <i>Larus ridibundus</i>                                    | 6.1  | 0.784 | 306   | 2.486 | G  |
| 172. | <i>Leptoptilos javanicus</i>                               | 2.6  | 0.416 | 5710  | 3.757 | MW |
| 173. | <i>Leptotila verreauxi</i>                                 | 6.8  | 0.830 | 131   | 2.117 | MW |
| 174. | <i>Leucosarcia melanoleuca</i>                             | 3.8  | 0.581 | 445   | 2.648 | MW |
| 175. | <i>Lichenostomus virescens</i>                             | 14.2 | 1.151 | 25    | 1.398 | MW |
| 176. | <i>Lichmera indistincta</i>                                | 23.1 | 1.364 | 9     | 0.954 | MW |
| 177. | <i>Lonchura fuscans</i>                                    | 10.2 | 1.009 | 9.5   | 0.978 | MW |
| 178. | <i>Lonchura maja</i>                                       | 11.7 | 1.069 | 12.8  | 1.107 | MW |

|                          |                                     |      |       |       |       |    |
|--------------------------|-------------------------------------|------|-------|-------|-------|----|
| 179.                     | <i>Lonchura malacca</i>             | 11.9 | 1.074 | 11.8  | 1.072 | MW |
| 180.                     | <i>Lonchura striata</i>             | 19.7 | 1.295 | 10.1  | 1.004 | G  |
| 181.                     | <i>Loxia curvirostra</i>            | 15.2 | 1.183 | 39.4  | 1.595 | G  |
| 182.                     | <i>Loxia pytiopsittacus</i>         | 14.9 | 1.173 | 53.7  | 1.730 | G  |
| 183.                     | <i>Loxoides baileui</i>             | 12.9 | 1.109 | 36    | 1.556 | MW |
| 184.                     | <i>Lullula arborea</i>              | 14.7 | 1.169 | 33.2  | 1.521 | G  |
| 185.                     | <i>Luscinia svecica</i>             | 17.3 | 1.237 | 20.8  | 1.318 | G  |
| 186.                     | <i>Macronectes giganteus</i>        | 2.8  | 0.446 | 4780  | 3.679 | MW |
| 187.                     | <i>Malacopteron cinereum</i>        | 13.5 | 1.130 | 15.8  | 1.199 | MW |
| 188.                     | <i>Manacus vitellinus</i>           | 15.0 | 1.175 | 15.5  | 1.190 | MW |
| 189.                     | <i>Megadyptes antipodes</i>         | 2.4  | 0.380 | 4800  | 3.681 | MW |
| 190.                     | <i>Meitihreptus lunatus</i>         | 17.4 | 1.241 | 14.3  | 1.155 | MW |
| 191.                     | <i>Melanerpes formicivorus</i>      | 10.1 | 1.004 | 73    | 1.863 | MW |
| 192.                     | <i>Melopsittacus undulatus</i>      | 9.8  | 0.992 | 33.6  | 1.526 | G  |
| 193.                     | <i>Melospiza georgiana</i>          | 14.2 | 1.151 | 14.9  | 1.173 | MW |
| 194.                     | <i>Melospiza melodia</i>            | 13.1 | 1.117 | 19.1  | 1.281 | MW |
| 195.                     | <i>Merops viridis</i>               | 8.7  | 0.941 | 33.8  | 1.529 | MW |
| 196.                     | <i>Motacilla alba</i>               | 15.5 | 1.189 | 18.2  | 1.260 | G  |
| 197.                     | <i>Motacilla flava</i>              | 17.5 | 1.243 | 14.7  | 1.167 | G  |
| 198.                     | <i>Muscicapa striata</i>            | 17.1 | 1.234 | 14.4  | 1.158 | G  |
| 199.                     | <i>Myiarchus crinitus</i>           | 11.3 | 1.053 | 33.9  | 1.530 | MW |
| 200.                     | <i>Nectarinia venusta</i>           | 19.7 | 1.295 | 7.1   | 0.851 | MW |
| 201.                     | <i>Neophema petrophila</i>          | 13.1 | 1.117 | 48.4  | 1.685 | MW |
| 202.                     | <i>Nucifraga caryocatactes</i>      | 9.2  | 0.962 | 147.0 | 2.167 | G  |
| 203.                     | <i>Nyctea scandiaca</i>             | 2.1  | 0.318 | 2026  | 3.307 | MW |
| 204.                     | <i>Nymphicus hollandicus</i>        | 8.0  | 0.906 | 85.6  | 1.932 | G  |
| 205.                     | <i>Oceanodroma furcata</i>          | 10.1 | 1.004 | 44.6  | 1.649 | MW |
| 206.                     | <i>Ocyphaps lophotes</i>            | 5.8  | 0.764 | 187   | 2.272 | MW |
| 207.                     | <i>Oreotrochilus estella</i>        | 22.9 | 1.359 | 8.4   | 0.924 | MW |
| 208.                     | <i>Oriolus oriolus</i>              | 10.0 | 1.000 | 64.9  | 1.812 | G  |
| 209.                     | <i>Otus asio</i>                    | 3.5  | 0.548 | 166   | 2.220 | MW |
| 210.                     | <i>Otus trichopsis</i>              | 3.7  | 0.570 | 120   | 2.079 | MW |
| 211.                     | <i>Padda oryzivora</i>              | 12.1 | 1.084 | 25.4  | 1.405 | MW |
| 212.                     | <i>Parus ater</i>                   | 22.0 | 1.342 | 10.8  | 1.033 | G  |
| 213.                     | <i>Parus atricapillus</i>           | 24.5 | 1.389 | 10.3  | 1.013 | MW |
| 214.                     | <i>Parus major</i>                  | 20.1 | 1.303 | 16.4  | 1.215 | G  |
| 215.                     | <i>Parus varius</i>                 | 20.3 | 1.307 | 17.7  | 1.248 | G  |
| 216.                     | <i>Passer domesticus bactrianus</i> | 15.9 | 1.200 | 23.2  | 1.365 | G  |
| 217.                     | <i>Passer montanus</i>              | 17.9 | 1.253 | 22.0  | 1.342 | G  |
| 218.                     | <i>Passerculus sandwichensis</i>    | 13.9 | 1.143 | 15.9  | 1.201 | MW |
| 219.                     | <i>Patagona gigas</i>               | 15.0 | 1.175 | 19.1  | 1.281 | MW |
| 220.                     | <i>Pelacanoides urinatrix</i>       | 10.3 | 1.011 | 136   | 2.134 | MW |
| 221.                     | <i>Pelecanus conspicillatus</i>     | 3.6  | 0.551 | 5090  | 3.707 | MW |
| 222.                     | <i>Pelecanus occidentalis</i>       | 3.4  | 0.533 | 3038  | 3.483 | MW |
| 223.                     | <i>Penelope purpurescens</i>        | 2.7  | 0.425 | 2040  | 3.310 | MW |
| 224.                     | <i>Perdix perdix</i>                | 4.3  | 0.634 | 501   | 2.700 | G  |
| 225.                     | <i>Perisoreus canadensis</i>        | 9.5  | 0.979 | 71.2  | 1.852 | MW |
| 226.                     | <i>Pernis apivorus</i>              | 3.6  | 0.555 | 652   | 2.814 | G  |
| 227.                     | <i>Phalacrocorax auritus</i>        | 4.1  | 0.616 | 1330  | 3.124 | MW |
| 228.                     | <i>Phalaenoptilus nuttalli</i>      | 4.4  | 0.646 | 35    | 1.544 | MW |
| 229.                     | <i>Phaps chalcoptera</i>            | 5.0  | 0.702 | 304   | 2.483 | MW |
| 230.                     | <i>Phaps elegans</i>                | 6.5  | 0.814 | 190   | 2.279 | MW |
| 231.                     | <i>Phaps histrionica</i>            | 5.0  | 0.703 | 257   | 2.410 | MW |
| 232.                     | <i>Philidonyris novaehollandiae</i> | 18.3 | 1.263 | 17.3  | 1.238 | MW |
| 233.                     | <i>Phoenicopus ruber</i>            | 5.0  | 0.701 | 3040  | 3.483 | MW |
| (Phoenicopus antiquorum) |                                     |      |       |       |       |    |
| 234.                     | <i>Phoeniculus purpureus</i>        | 2.3  | 0.371 | 74.07 | 1.870 | MW |
| 235.                     | <i>Phoenicurus ochruros</i>         | 17.4 | 1.241 | 13.9  | 1.143 | G  |
| 236.                     | <i>Phoenicurus phoenicurus</i>      | 17.9 | 1.253 | 13.0  | 1.114 | G  |
| 237.                     | <i>Phylidonyris melanops</i>        | 15.6 | 1.193 | 18.8  | 1.274 | MW |
| 238.                     | <i>Phylloscopus collybita</i>       | 20.0 | 1.302 | 8.2   | 0.914 | G  |
| 239.                     | <i>Phylloscopus sibilatrix</i>      | 19.0 | 1.279 | 9.2   | 0.964 | G  |
| 240.                     | <i>Phylloscopus trochilus</i>       | 19.5 | 1.289 | 10.7  | 1.029 | G  |

|      |                                  |      |        |        |       |    |
|------|----------------------------------|------|--------|--------|-------|----|
| 241. | <i>Pica nuttalli</i>             | 9.7  | 0.985  | 151.9  | 2.182 | MW |
| 242. | <i>Pica pica</i>                 | 7.5  | 0.877  | 158.9  | 2.201 | MW |
| 243. | <i>Picoides major</i>            | 8.9  | 0.949  | 117    | 2.068 | MW |
| 244. | <i>Picoides pubescens</i>        | 17.7 | 1.247  | 21.7   | 1.336 | MW |
| 245. | <i>Pinicola enucleator</i>       | 13.8 | 1.141  | 78.4   | 1.894 | G  |
| 246. | <i>Pipra mentalis</i>            | 15.8 | 1.198  | 12.3   | 1.090 | MW |
| 247. | <i>Pluvialis dominica</i>        | 5.5  | 0.737  | 118    | 2.072 | MW |
| 248. | <i>Pluvialis squatarola</i>      | 7.9  | 0.896  | 226    | 2.354 | MW |
| 249. | <i>Podargus ocellatus</i>        | 3.9  | 0.592  | 145    | 2.161 | MW |
| 250. | <i>Podargus strigoides</i>       | 2.7  | 0.434  | 380.3  | 2.580 | MW |
| 251. | <i>Poocetes gramineus</i>        | 12.6 | 1.101  | 21.5   | 1.332 | MW |
| 252. | <i>Protonotaria citrea</i>       | 15.5 | 1.192  | 12.8   | 1.107 | MW |
| 253. | <i>Prunella modularis</i>        | 19.4 | 1.287  | 16.8   | 1.225 | G  |
| 254. | <i>Psaltriparus minimus</i>      | 22.0 | 1.342  | 5.5    | 0.740 | MW |
| 255. | <i>Pterocles orientalis</i>      | 5.0  | 0.702  | 386.4  | 2.587 | MW |
| 256. | <i>Pterodroma phaeopygia</i>     | 12.4 | 1.092  | 425    | 2.628 | MW |
| 257. | <i>Ptilinopus melanospila</i>    | 5.0  | 0.697  | 98     | 1.991 | MW |
| 258. | <i>Ptilinopus superbus</i>       | 6.3  | 0.798  | 120.4  | 2.081 | MW |
| 259. | <i>Puffinus griseus</i>          | 3.9  | 0.591  | 740    | 2.869 | MW |
| 260. | <i>Pycnonotus finlaysoni</i>     | 8.4  | 0.924  | 26.3   | 1.420 | MW |
| 261. | <i>Pycnonotus goiavier</i>       | 8.6  | 0.936  | 28.6   | 1.456 | MW |
| 262. | <i>Pygoscelis adeliae</i>        | 3.1  | 0.489  | 3970   | 3.599 | MW |
| 263. | <i>Pygoscelis papua</i>          | 3.0  | 0.470  | 6290   | 3.799 | MW |
| 264. | <i>Pyrrhula pyrrhula</i>         | 18.2 | 1.259  | 30.4   | 1.483 | G  |
| 265. | <i>Regulus regulus</i>           | 26.5 | 1.423  | 5.5    | 0.740 | G  |
| 266. | <i>Riparia riparia</i>           | 17.1 | 1.233  | 13.6   | 1.134 | G  |
| 267. | <i>Saxicola rubetra</i>          | 16.9 | 1.228  | 14.3   | 1.155 | G  |
| 268. | <i>Sayornis phoebe</i>           | 15.9 | 1.202  | 21.6   | 1.334 | MW |
| 269. | <i>Scardefella inca</i>          | 6.2  | 0.794  | 40.5   | 1.607 | MW |
| 270. | <i>Scolopax minor</i>            | 6.8  | 0.833  | 156.7  | 2.195 | MW |
| 271. | <i>Scolopax rusticola</i>        | 5.0  | 0.701  | 430    | 2.633 | G  |
| 272. | <i>Sephanoides sephaniodes</i>   | 17.8 | 1.250  | 5.74   | 0.759 | MW |
| 273. | <i>Serinus canaria</i>           | 17.1 | 1.234  | 13.3   | 1.124 | G  |
| 274. | <i>Sialia mexicana</i>           | 15.4 | 1.187  | 27.5   | 1.439 | MW |
| 275. | <i>Spermestes cucullatus</i>     | 7.3  | 0.866  | 10.62  | 1.026 | MW |
| 276. | <i>Spheniscus humboldti</i>      | 2.5  | 0.390  | 3870   | 3.588 | MW |
| 277. | <i>Spinus spinus</i>             | 20.8 | 1.317  | 14.0   | 1.146 | G  |
| 278. | <i>Spizella arborea</i>          | 19.8 | 1.297  | 16.6   | 1.220 | MW |
| 279. | <i>Spizella passerina</i>        | 16.3 | 1.212  | 11.9   | 1.076 | MW |
| 280. | <i>Sterna maxima</i>             | 6.7  | 0.828  | 373    | 2.572 | MW |
| 281. | <i>Streptopelia senegalensis</i> | 7.9  | 0.895  | 108    | 2.033 | G  |
| 282. | <i>Streptopelia turtur</i>       | 7.4  | 0.869  | 154    | 2.188 | G  |
| 283. | <i>Strix aluco</i>               | 4.0  | 0.602  | 520    | 2.716 | MW |
| 284. | <i>Strix occidentalis</i>        | 4.7  | 0.671  | 571    | 2.757 | MW |
| 285. | <i>Struthio camelus</i>          | 0.6  | -0.200 | 100000 | 5.000 | MW |
| 286. | <i>Sturnus vulgaris</i>          | 12.0 | 1.078  | 75.0   | 1.875 | G  |
| 287. | <i>Sula dactylatra</i>           | 4.3  | 0.631  | 1289   | 3.110 | MW |
| 288. | <i>Sylvia atricapilla</i>        | 19.0 | 1.279  | 21.9   | 1.340 | G  |
| 289. | <i>Sylvia borin</i>              | 16.8 | 1.225  | 24.8   | 1.394 | G  |
| 290. | <i>Sylvia curruca</i>            | 18.8 | 1.274  | 10.6   | 1.025 | G  |
| 291. | <i>Sylvia nisoria</i>            | 15.1 | 1.180  | 21.4   | 1.330 | G  |
| 292. | <i>Taeniopygia castanotis</i>    | 19.5 | 1.290  | 11.7   | 1.068 | G  |
| 293. | <i>Tarsiger cyanurus</i>         | 16.0 | 1.205  | 14.8   | 1.170 | G  |
| 294. | <i>Tetrao urogallus</i>          | 2.9  | 0.470  | 4010   | 3.603 | G  |
| 295. | <i>Thamnophilus punctatus</i>    | 16.4 | 1.214  | 21     | 1.322 | MW |
| 296. | <i>Thinocorus rumicivorus</i>    | 5.6  | 0.747  | 55.5   | 1.744 | MW |
| 297. | <i>Tiaris canora</i>             | 19.9 | 1.299  | 7.8    | 0.892 | G  |
| 298. | <i>Tringa ochropus</i>           | 10.2 | 1.010  | 90     | 1.954 | MW |
| 299. | <i>Troglodytes troglodytes</i>   | 23.7 | 1.374  | 9.0    | 0.954 | G  |
| 300. | <i>Trogon rufus</i>              | 8.1  | 0.910  | 53     | 1.724 | MW |
| 301. | <i>Tudus viscivorus</i>          | 10.2 | 1.009  | 108.2  | 2.034 | MW |
| 302. | <i>Turdus iliacus</i>            | 12.5 | 1.095  | 58.0   | 1.763 | G  |
| 303. | <i>Turdus merula</i>             | 11.3 | 1.052  | 82.6   | 1.917 | G  |

|      |                               |      |       |       |       |    |
|------|-------------------------------|------|-------|-------|-------|----|
| 304. | <i>Turdus philomelos</i>      | 11.6 | 1.063 | 62.8  | 1.798 | G  |
| 305. | <i>Turdus viscivorus</i>      | 10.2 | 1.009 | 108.2 | 2.034 | G  |
| 306. | <i>Turnix suscitator</i>      | 6.7  | 0.824 | 58.1  | 1.764 | MW |
| 307. | <i>Tyrannus tyrannus</i>      | 12.2 | 1.087 | 35.7  | 1.553 | MW |
| 308. | <i>Upupa epops</i>            | 8.2  | 0.916 | 67    | 1.826 | MW |
| 309. | <i>Uraeginthus bengalis</i>   | 17.0 | 1.232 | 9.1   | 0.959 | G  |
| 310. | <i>Uria aalge</i>             | 7.1  | 0.852 | 956   | 2.980 | MW |
| 311. | <i>Uria lomvia</i>            | 6.9  | 0.838 | 989   | 2.995 | MW |
| 312. | <i>Vermivora pinus</i>        | 19.2 | 1.284 | 7.8   | 0.892 | MW |
| 313. | <i>Vidua paradisaea</i>       | 18.5 | 1.267 | 10.5  | 1.021 | MW |
| 314. | <i>Vultur gryphus</i>         | 1.6  | 0.217 | 10320 | 4.014 | MW |
| 315. | <i>Xiphorhynchus guttatus</i> | 9.9  | 0.994 | 45.2  | 1.655 | MW |
| 316. | <i>Yynx torquilla</i>         | 11.3 | 1.052 | 31.8  | 1.502 | G  |
| 317. | <i>Zenaida macroura</i>       | 6.0  | 0.777 | 123   | 2.090 | MW |
| 318. | <i>Zonotricha querula</i>     | 13.4 | 1.127 | 33.3  | 1.522 | MW |
| 319. | <i>Zonotrichia albicollis</i> | 13.8 | 1.139 | 20.2  | 1.305 | MW |
| 320. | <i>Zonotrichia leucophrys</i> | 12.9 | 1.110 | 26.1  | 1.417 | MW |
| 321. | <i>Zosterops lateralis</i>    | 13.5 | 1.132 | 11    | 1.041 | MW |

Table **S6b**. Basal metabolic rate in birds (experimental data obtained by V. Gavrilov)

**Notes on measurements procedure.** Basal metabolism is the rate of energy utilization by a bird at complete rest, without the energetic costs of digestion and assimilation of food or cold stress, i.e. the rate of energy utilization of fasting, inactive birds in the zone of thermoneutrality. Basal metabolism was determined by measuring rates of oxygen consumption in closed boxes of different volumes, where CO<sub>2</sub> was absorbed using NaOH or KOH (closed-circuit respirometry). Basal oxygen consumption was measured in birds under postabsorptive conditions at night (N), as indicated in Table **S6a**, at different ambient temperatures that allowed strict determination of the thermoneutrality zone. The larger birds were deprived of food from mid-day, and the smaller birds from 3 to 4 hours before the nightfall. The birds were placed singly in small cages, which were then placed in plexiglass chambers in the dark. The chamber sizes varied from 3 to 25 liters, depending on the size of the bird. The flow of air through the chamber was controlled, and after stabilizing chamber temperature, the outflow was connected to an oxygen measuring instrument. Actual measurements of oxygen consumption were never started earlier than 1-3 hours after dusk and always ended 1 to 2 hours before dawn. Each experiment lasted from 1 to 4 hours. Tests were done at the beginning and end of the experiments to make certain that the boxes were properly sealed. Measurements were also done in the daytime on birds with different amounts of food in the alimentary tract. **The number of individuals measured varied from two (*Tetrao urogallus*) or three-four (in some large nonpasserine birds) to eight-twelve (in most other species) and up to 20-35 (in well-studied species, like for example *Parus major*, *Fringilla coelebs*).** The birds were weighed early at the beginning and at the end of the experiment. If the change of body mass was small (not more than 1.5-2% of body mass), corrections were made using a caloric equivalent equal to 25.1 kJ g<sup>-1</sup>. If the change of body mass was greater, the data were not used.

Notations:

*Mg* — mean body mass, g; *N* — number of measured birds;

D — measurements were made during the active (day-time) phase of the avian circadian cycle;

N — measurements were made during the resting (night-time) phase of the avian circadian cycle;

W — measurements were made during the nonproductive "winter" phase of the avian annual cycle;

S — measurements were made during the reproductive "summer" phase of the avian annual cycle;

A — measurements were made during the nonproductive "autumnal" (postmoult) phase of the avian annual cycle;

V — measurements were made during the early part of the productive "vernal" phase of the avian annual cycle;

Y — measurements were made during the whole year;

QkJday — whole-body basal metabolic rate,  $\text{kJ ind}^{-1} \text{day}^{-1}$ .

**Note: data in Table S6a marked "G" are taken from Table S6b and correspond to the minimum night-time (N) mass-specific basal metabolic rate for the corresponding species,  $qWkg = (\text{QkJday}/\text{Mg}) \times 10^6 / 24 / 3600 \text{ W kg}^{-1}$ .**

| Species                 | N  | Mg    | Sea-<br>son | Time | QkJday | References                                 |
|-------------------------|----|-------|-------------|------|--------|--------------------------------------------|
| <u>Sphenisciformes</u>  |    |       |             |      |        |                                            |
| Eudyptes cristatus      | 4  | 2330  | W           | N    | 504.5  | Gavrilov, 1977                             |
| Eudyptes chrysolophus   | 4  | 3870  | W           | N    | 747.8  | Gavrilov, 1977                             |
| Aptenodytes patagonica  | 3  | 11080 | W           | N    | 1899.2 | Gavrilov, 1977                             |
| <u>Anseriformes</u>     |    |       |             |      |        |                                            |
| Aix sponsa              | 8  | 448   | S           | N    | 194.3  | Gavrilov, 1980abc,<br>1982ab, 1997, 1999ab |
| Aix sponsa              | 8  | 448   | S           | D    | 221.5  | Gavrilov, 1985ab, 1997                     |
| Aix sponsa              | 8  | 468   | W           | N    | 205.6  | Gavrilov, 1981, 1997,<br>1999ab            |
| Aix sponsa              | 8  | 468   | W           | D    | 273.4  | Gavrilov, 1981, 1997                       |
| Anas penelope           | 4  | 723   | S           | N    | 244.1  | Gavrilov, 1980abc,<br>1982ab, 1997         |
| Anas penelope           | 4  | 718   | W           | N    | 260.4  | Gavrilov, 1980abc,<br>1982ab, 1997         |
| Anas platyrhynchos      | 12 | 1020  | S           | N    | 351.7  | Gavrilov, 1980abc,<br>1982ab, 1997, 1999ab |
| Anas platyrhynchos      | 12 | 1020  | S           | D    | 415.6  | Gavrilov, 1985ab, 1997                     |
| Anas platyrhynchos      | 12 | 1132  | W           | N    | 435.4  | Gavrilov, 1981, 1997,<br>1999ab            |
| Anas platyrhynchos      | 12 | 1132  | W           | D    | 566.9  | Gavrilov, 1981, 1997                       |
| Anser anser             | 4  | 3250  | S           | N    | 937.9  | Gavrilov, Dolnik, 1985                     |
| <u>Falconiformes</u>    |    |       |             |      |        |                                            |
| Falco tinnunculus       | 4  | 131   | A           | N    | 67.0   | Gavrilov, 1985ab                           |
| Accipiter nisus         | 6  | 135   | S           | N    | 82.1   | Gavrilov, Dolnik, 1985                     |
| Falco subbuteo          | 4  | 208   | A           | N    | 112.2  | Gavrilov, Dolnik, 1985                     |
| Pernis apivorus         | 2  | 652   | S           | N    | 202.2  | Gavrilov, Dolnik, 1985                     |
| <u>Galliformes</u>      |    |       |             |      |        |                                            |
| Excalfactoria chinensis | 6  | 44    | S           | N    | 35.15  | Gavrilov, 1985ab                           |
| Excalfactoria chinensis | 6  | 44    | S           | D    | 35.56  | Gavrilov, 1985ab                           |
| Excalfactoria chinensis | 6  | 41    | W           | N    | 50.7   | Gavrilov, 1981                             |
| Excalfactoria chinensis | 6  | 41    | W           | D    | 60.3   | Gavrilov, 1981                             |
| Coturnix coturnix       | 4  | 97    | S           | N    | 77.0   | Gavrilov, 1980abc,<br>1982ab, 1997, 1999ab |
| Coturnix coturnix       | 4  | 97    | S           | D    | 83.2   | Gavrilov, 1985ab, 1997                     |
| Coturnix coturnix       | 4  | 109   | W           | N    | 71.6   | Gavrilov, 1981, 1997,<br>1999ab            |
| Coturnix coturnix       | 4  | 109   | W           | D    | 85.4   | Gavrilov, 1981, 1997                       |
| Perdix perdix           | 5  | 483   | S           | N    | 207.3  | Gavrilov, 1980abc,<br>1982ab, 1997, 1999ab |
| Perdix perdix           | 5  | 483   | S           | D    | 225.9  | Gavrilov, 1985ab, 1997                     |
| Perdix perdix           | 5  | 501   | W           | N    | 186.3  | Gavrilov, 1981, 1997,<br>1999ab            |
| Perdix perdix           | 5  | 501   | W           | D    | 235.3  | Gavrilov, 1981, 1997                       |
| Lagopus lagopus         | 6  | 524   | S           | N    | 268.8  | Gavrilov, 1980abc,<br>1982ab, 1997, 1999ab |



|                           |    |       |   |   |        |                                         |
|---------------------------|----|-------|---|---|--------|-----------------------------------------|
| Lagopus lagopus           | 6  | 524   | S | D | 306.4  | Gavrilov, 1985ab, 1997                  |
| Lagopus lagopus           | 6  | 567   | W | N | 248.3  | Gavrilov, 1981, 1997, 1999ab            |
| Lagopus lagopus           | 6  | 567   | W | D | 328.7  | Gavrilov, 1981, 1997                    |
| Alectoris graeca          | 4  | 620   | S | N | 246.6  | Gavrilov, 1980abc, 1982ab, 1997, 1999ab |
| Alectoris graeca          | 4  | 633   | W | N | 219.0  | Gavrilov, 1980abc, 1982ab, 1997, 1999ab |
| Tetrao urogallus ♀        | 2  | 3900  | S | N | 1030.0 | Gavrilov, 1980abc, 1982ab, 1997, 1999ab |
| Tetrao urogallus ♀        | 2  | 4010  | W | N | 1021.6 | Gavrilov, 1980abc, 1982ab, 1997, 1999ab |
| <u>Gruiformes</u>         |    |       |   |   |        |                                         |
| Crex crex                 | 4  | 96    | S | N | 68.2   | Gavrilov, Dolnik, 1985                  |
| Fulica atra               | 3  | 412   | S | N | 176.3  | Gavrilov, 1980abc, 1982ab, 1997, 1999ab |
| Fulica atra               | 3  | 436   | W | N | 204.3  | Gavrilov, 1980abc, 1982ab, 1997, 1999ab |
| <u>Charadriiformes</u>    |    |       |   |   |        |                                         |
| Charadrius dubius         | 4  | 36    | S | N | 36.0   | Gavrilov, 1980abc, 1982ab, 1997, 1999ab |
| Charadrius dubius         | 4  | 44    | W | N | 41.5   | Gavrilov, 1980abc, 1982ab, 1997, 1999ab |
| Larus ridibundus          | 5  | 285   | S | N | 173.3  | Gavrilov, 1980abc, 1982ab, 1997, 1999ab |
| Larus ridibundus          | 5  | 285   | S | D | 194.1  | Gavrilov, 1985ab, 1997                  |
| Larus ridibundus          | 5  | 306   | W | N | 160.8  | Gavrilov, 1981, 1997, 1999ab            |
| Larus ridibundus          | 5  | 306   | W | D | 193.0  | Gavrilov, 1981, 1997                    |
| Larus canus               | 3  | 428   | S | N | 201.0  | Gavrilov, 1980abc, 1982ab, 1997, 1999ab |
| Larus canus               | 3  | 428   | S | D | 215.0  | Gavrilov, 1985ab, 1997                  |
| Larus canus               | 3  | 431   | W | N | 194.3  | Gavrilov, 1981, 1997, 1999ab            |
| Larus canus               | 3  | 431   | W | D | 251.2  | Gavrilov, 1981, 1997                    |
| Scolopax rusticola        | 4  | 430   | S | N | 186.7  | Gavrilov, 1981                          |
| <u>Columbiformes</u>      |    |       |   |   |        |                                         |
| Streptopelia senegalensis | 3  | 108   | S | N | 73.3   | Gavrilov, Dolnik, 1985                  |
| Streptopelia turtur       | 4  | 154   | A | N | 98.4   | Gavrilov, Dolnik, 1985                  |
| Columba livia             | 6  | 353   | W | N | 160.4  | Gavrilov, 1981                          |
| Columba livia             | 6  | 353   | W | D | 178.8  | Gavrilov, 1981                          |
| Columba livia             | 6  | 368   | S | N | 143.2  | Gavrilov, 1985ab                        |
| Columba livia             | 6  | 368   | S | D | 154.4  | Gavrilov, 1985ab                        |
| Columba palumbus          | 4  | 493   | A | N | 171.3  | Gavrilov, Dolnik, 1985                  |
| <u>Psittaciformes</u>     |    |       |   |   |        |                                         |
| Melopsittacus undulatus   | 18 | 25,2  | S | N | 26.0   | Gavrilov, 1980abc, 1982ab, 1997, 1999ab |
| Melopsittacus undulatus   | 18 | 25,2  | S | D | 28.0   | Gavrilov, 1985ab, 1997                  |
| Melopsittacus undulatus   | 18 | 33,6  | W | N | 28.5   | Gavrilov, 1981, 1997, 1999ab            |
| Melopsittacus undulatus   | 18 | 33,6  | W | D | 31.4   | Gavrilov, 1981, 1997                    |
| Agapornis roseicollis     | 6  | 48.1  | S | N | 40.2   | Gavrilov, 1980abc, 1982ab, 1997, 1999ab |
| Agapornis roseicollis     | 6  | 48.1  | S | D | 44.0   | Gavrilov, 1985ab, 1997                  |
| Agapornis roseicollis     | 6  | 48.4  | W | N | 40.2   | Gavrilov, 1981, 1997, 1999ab            |
| Agapornis roseicollis     | 6  | 48.4  | W | D | 53.2   | Gavrilov, 1981, 1997                    |
| Agapornis fisheri         | 3  | 56.7  | W | N | 45.6   | Gavrilov, Dolnik, 1985                  |
| Nymphicus hollandicus     | 5  | 85.6  | S | N | 59.5   | Gavrilov, 1980abc, 1982ab, 1997, 1999ab |
| Nymphicus hollandicus     | 5  | 85.6  | S | D | 65.4   | Gavrilov, 1985ab, 1997                  |
| Nymphicus hollandicus     | 5  | 94.3  | W | N | 74.5   | Gavrilov, 1981, 1997, 1999ab            |
| Nymphicus hollandicus     | 5  | 94.3  | W | D | 88.3   | Gavrilov, 1981, 1997                    |
| <u>Cuculiformes</u>       |    |       |   |   |        |                                         |
| Cuculus canorus           | 4  | 111.6 | S | N | 72.4   | Gavrilov, Dolnik, 1985                  |
| <u>Strigiformes</u>       |    |       |   |   |        |                                         |
| Asio otus                 | 6  | 236   | S | N | 113.0  | Gavrilov, Dolnik, 1985                  |
| <u>Caprimulgiformes</u>   |    |       |   |   |        |                                         |
| Caprimulgus europeus      | 3  | 77.4  | S | N | 55.7   | Gavrilov, Dolnik, 1985                  |
| <u>Apodiformes</u>        |    |       |   |   |        |                                         |
| Apus apus                 | 6  | 44.9  | S | N | 37.7   | Gavrilov, 1985ab                        |
| <u>Coraciiformes</u>      |    |       |   |   |        |                                         |
| Alcedo atthis             | 4  | 34.3  | S | N | 32.7   | Gavrilov, Dolnik, 1985                  |

Piciformes

|                          |   |       |   |   |      |                                            |
|--------------------------|---|-------|---|---|------|--------------------------------------------|
| <i>Yynx torquilla</i>    | 6 | 31.8  | S | N | 31.0 | Gavrilov, Dolnik, 1985                     |
| <i>Dendrocopus major</i> | 7 | 98.0  | S | N | 77.5 | Gavrilov, 1980abc,<br>1982ab, 1997, 1999ab |
| <i>Dendrocopus major</i> | 7 | 117.0 | W | N | 90.0 | Gavrilov, 1980abc,<br>1982ab, 1997, 1999ab |

Passeriformes

|                                   |    |      |      |   |      |                                                            |
|-----------------------------------|----|------|------|---|------|------------------------------------------------------------|
| <i>Regulus regulus</i>            | 22 | 5.5  | S    | N | 12.6 | Gavrilov, 1997, 1999ab                                     |
| <i>Regulus regulus</i>            | 22 | 5.5  | W    | N | 15.9 | Gavrilov, 1997, 1999ab                                     |
| <i>Estrilda troglodytes</i>       | 6  | 7.5  | S    | N | 13.0 | Gavrilov, 1980abc, 1982ab<br>, 1997, 1999ab                |
| <i>Estrilda troglodytes</i>       | 6  | 7.5  | S    | D | 14.0 | Gavrilov, 1985ab, 1997                                     |
| <i>Estrilda troglodytes</i>       | 6  | 7.7  | W    | N | 13.4 | Gavrilov, 1980abc,<br>1982ab, 1997, 1999ab                 |
| <i>Estrilda troglodytes</i>       | 6  | 7.7  | W    | D | 14.6 | Gavrilov, 1985ab, 1997                                     |
| <i>Tiaris canora</i>              | 4  | 7.6  | S    | N | 13.4 | Gavrilov, 1980abc,<br>1982ab, 1997, 1999ab                 |
| <i>Tiaris canora</i>              | 4  | 7.8  | W    | N | 13.4 | Gavrilov, 1980abc,<br>1982ab, 1997, 1999ab                 |
| <i>Phylloscopus collybita</i>     | 6  | 8.2  | A    | N | 14.2 | Gavrilov, Dolnik, 1985                                     |
| <i>Aegithalos caudatus</i>        | 17 | 8.9  | S    | N | 17.2 | Gavrilov, 1974, 1980abc,<br>1982ab, 1997, 1999ab           |
| <i>Aegithalos caudatus</i>        | 17 | 8.8  | W    | N | 21.8 | Gavrilov, 1974, 1980abc,<br>1982ab, 1997, 1999ab           |
| <i>Troglodytes troglodytes</i>    | 16 | 9.0  | S    | N | 18.4 | Gavrilov, 1980abc,<br>1982ab, 1997, 1999ab                 |
| <i>Troglodytes troglodytes</i>    | 16 | 9.2  | W    | N | 20.9 | Gavrilov, 1980abc,<br>1982ab, 1997, 1999ab                 |
| <i>Uraeginthus bengalis</i>       | 5  | 9.1  | S    | N | 13.4 | Gavrilov, 1980abc,<br>1982ab, 1997, 1999ab                 |
| <i>Uraeginthus bengalis</i>       | 5  | 9.2  | W    | N | 14.2 | Gavrilov, 1980abc,<br>1982ab, 1997, 1999ab                 |
| <i>Phylloscopus sibilatrix</i>    | 4  | 9.2  | S    | N | 15.1 | Gavrilov, Dolnik, 1985                                     |
| <i>Lonchura striata</i>           | 6  | 10.1 | S    | N | 17.2 | Gavrilov, 1980abc,<br>1982ab, 1997, 1999ab                 |
| <i>Lonchura striata</i>           | 6  | 10.3 | W    | N | 18.4 | Gavrilov, 1980abc,<br>1982ab, 1997, 1999ab                 |
| <i>Sylvia curruca</i>             | 8  | 10.6 | S    | N | 17.2 | Gavrilov, Dolnik, 1985                                     |
| <i>Phylloscopus trochilus</i>     | 7  | 10.7 | W    | N | 18.0 | Gavrilov, Dolnik, 1985                                     |
| <i>Acrrocephalus palustris</i>    | 4  | 10.8 | S    | N | 17.6 | Gavrilov, Dolnik, 1985                                     |
| <i>Parus ater</i>                 | 18 | 10.8 | S    | N | 20.5 | Gavrilov, 1980abc,<br>1982ab, 1997, 1999ab                 |
| <i>Parus ater</i>                 | 18 | 10.8 | S    | D | 22.6 | Gavrilov, 1985ab, 1997                                     |
| <i>Parus ater</i>                 | 18 | 11.0 | W    | N | 23.4 | Gavrilov, 1981, 1997,<br>1999ab                            |
| <i>Parus ater</i>                 | 18 | 11.0 | W    | D | 27.7 | Gavrilov, 1981, 1997                                       |
| <i>Taeniopygia castanotis</i>     | 14 | 11.7 | S    | N | 19.7 | Gavrilov, 1980abc,<br>1982ab, 1997, 1999ab                 |
| <i>Taeniopygia castanotis</i>     | 14 | 11.8 | S    | D | 20.3 | Gavrilov, 1985ab, 1997                                     |
| <i>Taeniopygia castanotis</i>     | 14 | 11.8 | W    | N | 20.1 | Gavrilov, 1981, 1997,<br>1999ab                            |
| <i>Taeniopygia castanotis</i>     | 14 | 11.8 | W    | D | 22.6 | Gavrilov, 1981, 1997                                       |
| <i>Acrocephalus schoenobaenus</i> | 3  | 11.5 | S    | N | 18.8 | Gavrilov, Dolnik, 1985                                     |
| <i>Ficedula hypoleuca</i>         | 9  | 11.7 | A    | N | 20.1 | Gavrilov, Dolnik, 1985,<br>Gavrilov et al., 1995b,<br>1998 |
| <i>Hippolais icterina</i>         | 6  | 12.5 | S    | N | 21.8 | Gavrilov, Dolnik, 1985                                     |
| <i>Acanthis flammea</i>           | 16 | 14.0 | S    | N | 24.7 | Gavrilov, 1974, 1980abc,<br>1982ab, 1997, 1999ab           |
| <i>Acanthis flammea</i>           | 16 | 14.3 | W    | N | 29.3 | Gavrilov, 1974, 1980abc,<br>1982ab, 1997, 1999ab           |
| <i>Phoenicurus phoenicurus</i>    | 4  | 13.0 | S, A | N | 20.1 | Gavrilov, Dolnik, 1985                                     |
| <i>Serinus canaria</i>            | 5  | 13.3 | A    | N | 19.7 | Gavrilov, Dolnik, 1985                                     |
| <i>Riparia riparia</i>            | 3  | 13.6 | A    | N | 20.1 | Gavrilov, 1986                                             |
| <i>Phoenicurus ochruros</i>       | 3  | 13.9 | S    | N | 20.9 | Gavrilov, Dolnik, 1985                                     |
| <i>Spinus spinus</i>              | 18 | 14.0 | S    | N | 25.1 | Gavrilov, 1980abc,<br>1982ab, 1997, 1999ab                 |
| <i>Spinus spinus</i>              | 18 | 14.0 | S    | D | 27.6 | Gavrilov, 1985ab, 1997                                     |
| <i>Spinus spinus</i>              | 18 | 14.2 | W    | N | 28.5 | Gavrilov, 1981, 1997,<br>1999ab                            |
| <i>Spinus spinus</i>              | 18 | 14.2 | W    | D | 31.4 | Gavrilov, 1981, 1997                                       |
| <i>Saxicola rubetra</i>           | 4  | 14.3 | S    | N | 20.9 | Gavrilov, Dolnik, 1985                                     |
| <i>Muscicapa striata</i>          | 3  | 14.4 | S    | N | 21.3 | Gavrilov, Dolnik, 1985                                     |
| <i>Motacilla flava</i>            | 2  | 14.7 | S    | N | 22.2 | Gavrilov, Dolnik, 1985                                     |
| <i>Tarsiger cyanurus</i>          | 5  | 14.8 | W    | N | 20.5 | Gavrilov, 1985ab                                           |

|                              |    |      |   |   |      |                                               |
|------------------------------|----|------|---|---|------|-----------------------------------------------|
| Parus major                  | 20 | 16.4 | S | N | 28.5 | Gavrilov, 1980abc, 1982ab, 1997, 1999ab       |
| Parus major                  | 20 | 16.4 | S | D | 31.6 | Gavrilov, 1985ab, 1997, Gavrilov et al. 1995a |
| Parus major                  | 20 | 17.1 | W | N | 32.2 | Gavrilov, 1981, 1997, 1999ab                  |
| Parus major                  | 20 | 17.1 | W | D | 35.6 | Gavrilov, 1981, 1997, Gavrilov et al. 1995a   |
| Carduelis carduelis          | 6  | 16.5 | W | N | 30.1 | Gavrilov, 1982b                               |
| Prunella modularis           | 4  | 16.8 | A | N | 28.1 | Gavrilov, Dolnik, 1985                        |
| Acanthis cannabina           | 4  | 16.9 | A | N | 29.3 | Gavrilov, 1982b                               |
| Emberiza schoeniclus         | 3  | 17.6 | A | N | 26.0 | Gavrilov, 1982b                               |
| Erithacus rubecula           | 18 | 17.6 | S | N | 26.0 | Gavrilov, 1980abc, 1982ab                     |
| Erithacus rubecula           | 18 | 17.6 | S | D | 29.1 | Gavrilov, 1985ab                              |
| Erithacus rubecula           | 18 | 17.6 | W | N | 24.3 | Gavrilov, 1981                                |
| Erithacus rubecula           | 18 | 17.6 | W | D | 26.4 | Gavrilov, 1981                                |
| Parus varius                 | 5  | 17.7 | W | N | 31.0 | Gavrilov, 1985ab                              |
| Parus varius                 | 5  | 17.7 | W | D | 37.2 | Gavrilov, 1985ab                              |
| Hirundo rustica              | 4  | 18.4 | S | N | 26.0 | Gavrilov, 1986                                |
| Motacilla alba               | 8  | 18.0 | S | N | 26.0 | Gavrilov, 1980abc, 1982ab                     |
| Motacilla alba               | 8  | 18.2 | W | N | 24.3 | Gavrilov, 1980abc, 1982ab                     |
| Anthus pratensis             | 3  | 18.9 | S | N | 26.0 | Gavrilov, 1982b                               |
| Anthus trivialis             | 5  | 19.7 | A | N | 29.3 | Gavrilov, 1982b                               |
| Luscinia svecica             | 3  | 20.8 | S | N | 31.0 | Gavrilov, 1982b                               |
| Fringilla coelebs            | 35 | 21.0 | S | N | 32.2 | Gavrilov, 1980abc, 1982ab, 1997, 1999ab       |
| Fringilla coelebs            | 35 | 21.0 | S | D | 39.0 | Gavrilov, 1985ab, 1997                        |
| Fringilla coelebs            | 35 | 20.8 | W | N | 38.1 | Gavrilov, 1981, 1997, 1999ab                  |
| Fringilla coelebs            | 35 | 20.8 | W | D | 41.5 | Gavrilov, 1981, 1997, 1999ab                  |
| Fringilla montifringilla     | 12 | 21.0 | A | N | 33.1 | Gavrilov, 1982b                               |
| Sylvia nisoria               | 3  | 21.3 | S | N | 33.1 | Gavrilov, 1982b                               |
| Sylvia nisoria               | 3  | 21.4 | W | N | 28.0 | Gavrilov, 1982b                               |
| Carpodacus erythrinus        | 14 | 21.2 | S | N | 31.8 | Gavrilov, 1980abc, 1982ab, 1997, 1999ab       |
| Carpodacus erythrinus        | 14 | 21.2 | S | D | 36.6 | Gavrilov, 1985ab, 1997                        |
| Carpodacus erythrinus        | 14 | 21.6 | W | N | 31.0 | Gavrilov, 1981, 1997, 1999ab                  |
| Carpodacus erythrinus        | 14 | 21.6 | W | D | 33.1 | Gavrilov, 1981, 1997                          |
| Anthus campestris            | 2  | 21.8 | S | N | 33.1 | Gavrilov, 1981                                |
| Sylvia atricapilla           | 8  | 21.9 | A | N | 36.0 | Gavrilov, 1981                                |
| Emberiza hortulana           | 8  | 24.3 | S | N | 36.0 | Gavrilov, 1980abc, 1982ab                     |
| Emberiza hortulana           | 8  | 27.0 | W | N | 35.2 | Gavrilov, 1980abc, 1982ab                     |
| Passer montanus              | 7  | 22.0 | S | N | 34.0 | Gavrilov, 1981                                |
| Passer montanus              | 7  | 22.3 | A | N | 35.2 | Gavrilov, 1981                                |
| Passer domesticus bactrianus | 32 | 23.0 | S | N | 31.8 | Gavrilov, 1980abc, 1982ab, 1997, 1999ab       |
| Passer domesticus bactrianus | 32 | 23.2 | W | N | 31.8 | Gavrilov, 1980abc, 1982ab, 1997, 1999ab       |
| Sylvia borin                 | 12 | 24.8 | A | N | 36.0 | Gavrilov, 1982b                               |
| Passer domesticus            | 33 | 26.5 | S | N | 41.0 | Gavrilov, 1980abc, 1982ab, 1997, 1999ab       |
| Passer domesticus            | 33 | 26.5 | S | D | 47.2 | Gavrilov, 1985ab, 1997                        |
| Passer domesticus            | 33 | 26.4 | W | N | 42.3 | Gavrilov, 1981, 1997, 1999ab                  |
| Passer domesticus            | 33 | 26.4 | W | D | 44.8 | Gavrilov, 1981, 1997                          |
| Emberiza citrinella          | 27 | 26.8 | S | N | 37.7 | Gavrilov, 1980abc, 1982ab, 1997, 1999ab       |
| Emberiza citrinella          | 27 | 26.8 | S | D | 43.3 | Gavrilov, 1985ab, 1997                        |
| Emberiza citrinella          | 27 | 27.4 | W | N | 43.1 | Gavrilov, 1981, 1997, 1999ab                  |
| Emberiza citrinella          | 27 | 27.4 | W | D | 49.4 | Gavrilov, 1981, 1997                          |
| Lanius collurio              | 4  | 27.0 | S | N | 33.1 | Gavrilov, 1982b                               |
| Chloris chloris              | 17 | 28.2 | S | N | 41.0 | Gavrilov, 1980abc, 1982ab, 1997, 1999ab       |
| Chloris chloris              | 17 | 28.2 | S | D | 46.4 | Gavrilov, 1985ab, 1997                        |
| Chloris chloris              | 17 | 29.0 | W | N | 48.1 | Gavrilov, 1981, 1997, 1999ab                  |
| Chloris chloris              | 17 | 29.0 | W | D | 51.9 | Gavrilov, 1981, 1997                          |
| Loxia curvirostra            | 9  | 39.4 | S | N | 51.9 | Gavrilov, 1980abc, 1982ab, 1997, 1999ab       |
| Loxia curvirostra            | 9  | 42.7 | W | N | 58.2 | Gavrilov, 1980abc, 1982ab, 1997, 1999ab       |

|                                      |    |        |   |   |       |                                                       |
|--------------------------------------|----|--------|---|---|-------|-------------------------------------------------------|
| <i>Pyrrhula pyrrhula</i>             | 11 | 30.4   | W | N | 47.7  | Gavrilov, 1982b                                       |
| <i>Lullula arborea</i>               | 7  | 33.2   | A | N | 42.3  | Gavrilov, 1982b                                       |
| <i>Coccothraustes coccothraustes</i> | 4  | 48.3   | A | N | 60.3  | Gavrilov, 1982b                                       |
| <i>Loxia pytiopsittacus</i>          | 6  | 53.7   | W | N | 69.1  | Gavrilov, 1982b                                       |
| <i>Turdus iliacus</i>                | 9  | 58.0   | W | N | 62.4  | Gavrilov, 1979ab, 1981                                |
| <i>Turdus iliacus</i>                | 9  | 58.0   | W | D | 72.8  | Gavrilov, 1981                                        |
| <i>Turdus philomelos</i>             | 12 | 62.8   | S | N | 62.8  | Gavrilov, 1979ab, 1980abc, 1982ab, 1997, 1999ab       |
| <i>Turdus philomelos</i>             | 12 | 62.8   | S | D | 71.0  | Gavrilov, 1985ab, 1997                                |
| <i>Turdus philomelos</i>             | 12 | 64.0   | W | N | 65.3  | Gavrilov, 1979ab, 1980abc, 1982ab, 1997, 1999ab       |
| <i>Turdus philomelos</i>             | 12 | 64.0   | W | D | 74.9  | Gavrilov, 1982ab, 1997                                |
| <i>Oriolus oriolus</i>               | 3  | 64.9   | S | N | 56.1. | Gavrilov, 1982b                                       |
| <i>Lanius excubitor</i>              | 4  | 72.4   | A | N | 70.3  | Gavrilov, 1982b                                       |
| <i>Bombycilla garrulus</i>           | 6  | 72.5   | A | N | 82.5  | Gavrilov, Dolnik, 1985                                |
| <i>Sturnus vulgaris</i>              | 13 | 75.0   | A | N | 77.5  | Gavrilov, 1982b                                       |
| <i>Pinicola enucleator</i>           | 5  | 78.4   | W | N | 93.8  | Gavrilov, Dolnik, 1985                                |
| <i>Turdus merula</i>                 | 12 | 82.6   | S | N | 80.4  | Gavrilov, 1979ab, 1980abc, 1982ab, 1997, 1999ab       |
| <i>Turdus merula</i>                 | 12 | 82.6   | S | D | 93.3  | Gavrilov, 1997                                        |
| <i>Turdus merula</i>                 | 12 | 83.0   |   | N | 89.6  | Gavrilov, 1979ab, 1980abc, 1982ab, 1997, 1999ab       |
| <i>Turdus merula</i>                 | 12 | 83.0   | W | D | 105.5 | Gavrilov, 1981, 1997, 1999ab                          |
| <i>Turdus viscivorus</i>             | 9  | 108.2  | W | N | 95.5  | Gavrilov, 1979ab                                      |
| <i>Nucifraga caryocatactes</i>       | 11 | 147.0  | W | N | 116.4 | Gavrilov, 1979ab                                      |
| <i>Garrulus glandarius</i>           | 13 | 153.0  | W | N | 119.7 | Gavrilov, 1979ab                                      |
| <i>Pica pica</i>                     | 6  | 202.0  | W | N | 148.6 | Gavrilov, 1979ab                                      |
| <i>Coleus monedula</i>               | 9  | 209.0  | S | N | 131.2 | Gavrilov, 1985ab                                      |
| <i>Coleus monedula</i>               | 9  | 209.0  | S | D | 151.2 | Gavrilov, 1985ab                                      |
| <i>Coleus monedula</i>               | 9  | 215.0  | W | N | 160.8 | Gavrilov, 1979ab, 1981                                |
| <i>Coleus monedula</i>               | 9  | 215.0  | W | D | 167.5 | Gavrilov, 1981                                        |
| <i>Corvus frugilegus</i>             | 5  | 390.0  | W | N | 226.1 | Gavrilov, 1979ab                                      |
| <i>Corvus corone cornix</i>          | 11 | 518.0  | S | N | 286.8 | Gavrilov, 1979ab, 1980abc, 1982ab, 1997, 1999ab       |
| <i>Corvus corone cornix</i>          | 11 | 518.0  | S | D | 329.8 | Gavrilov, 1985ab, 1997                                |
| <i>Corvus corone cornix</i>          | 11 | 540.0  | W | N | 330.8 | Gavrilov, 1979ab, 1980abc, 1981, 1982ab, 1997, 1999ab |
| <i>Corvus corone cornix</i>          | 11 | 540.0  | W | D | 386.9 | Gavrilov, 1981, 1997                                  |
| <i>Cornus ruficollis</i>             | 4  | 660.0  | W | N | 293.5 | Gavrilov, 1979ab                                      |
| <i>Corvus corax</i>                  | 7  | 1203.0 | S | N | 476.1 | Gavrilov, 1979ab, 1980abc, 1981, 1982ab, 1997, 1999ab |
| <i>Corvus corax</i>                  | 7  | 1203.0 | S | D | 518.9 | Gavrilov, 1985ab, 1997                                |
| <i>Corvus corax</i>                  | 7  | 1208   | W | N | 518.3 | Gavrilov, 1979ab, 1980abc, 1982ab, 1997, 1999ab       |
| <i>Corvus corax</i>                  | 7  | 1208   | W | D | 618.0 | Gavrilov, 1981, 1997                                  |

## References to Table S6b

- Gavrilov V.M. 1974a. Seasonal and daily variations of standard metabolic rate in passerine birds. Materialy 6 Vsesojusnoi Ornithologicheskoi Konferentsii (Proceedings of the 6 All-Union Ornithological Conference). Moscow: Moscow University Press. Vol.1, P.134-136. (in Russian)
- Gavrilov, V.M. 1977. Penguin energetics. - Penguin adaptations. Moscow: Nauka. P.102-110. (in Russian)
- Gavrilov V.M. 1979a. Bioenergetics of large Passeriformes. 1. Metabolism of rest and energy of existence. Zool. Zh. Vol.58, N 4, P.530-541 (in Russian, English summary)
- Gavrilov V.M. 1979b. Bioenergetics of large Passeriformes. 2. Caloric equivalent on loss of body mass and dependence of bioenergetic parameters on body mass. Zool. Zh. Vol.58, N 5, P.693-703 (in Russian, English summary)
- Gavrilov, V.M. 1980a. Energy existence of Galliformes in relation to ambient temperatures, seasons and body mass. - Ornithologia. Vol.15. P.75-79 (in Russian)
- Gavrilov, V.M. 1980b. Trends of bioenergetic adaptations in birds to seasonal changes in climate. - Ecologia, geographia i okhrana ptitz. Ecology, Geography and Protection of Birds. Leningrad: Nauka. P.73-97.

- Gavrilov, V.M. 1980c. Seasonal changes of metabolism in migratory and sedentary passerine and non-passerine birds. - *Ornithologia*. Vol.15. P.208-211. (in Russian)
- Gavrilov, V.M. 1981. Circadian changes of resting metabolism in birds. - *Ornithologia*. Vol.16. P.42-50. (in Russian)
- Gavrilov, V.M. 1982a. Energy existence and basal metabolism of insectivorous and granivorous passerine birds. - *Ornithologia*. Vol.17. P.66-71. (in Russian, English summary)
- Gavrilov, V.M. 1982b. Bioenergetic adaptations in birds to seasonal variations in climate. - Gavrilov, V.M. and Potapov, R.L., eds. *Ornithological Studies in the USSR*. Moscow: Nauka. Vol.2. P.377-402.
- Gavrilov, V.M. 1985a. Energy of existence at 0° and 30° and basal metabolism of insectivorous and granivorous Passeriformes: their seasonal change and dependence on body mass. - Ilyichov, V.D. and Gavrilov, V.M., eds. *Acta XVIII Congress Internationalis Ornithologici*. Moscow: Nauka. Vol.2. P.1220-1227.
- Gavrilov, V.M. 1985b. Seasonal and circadian changes of thermoregulation in passerine and non-passerine birds: which is more important? Ilyichov, V.D. and Gavrilov, V.M., eds. *Acta XVIII Congress Internationalis Ornithologici*. Moscow: Nauka. Vol.2. P.1254-1277.
- Gavrilov, V.M. 1996a. Basal metabolic rate in homoiothermal animals: 1. Scale of power and fundamental characteristics of energetics. - *Zh. Obshch. Biol.* Vol.57. N 3. P.326-345. (in Russian, English summary)
- Gavrilov, V.M. 1996b. Basal metabolic rate in homoiothermal animals: 2. Origin in the course of evolution, energetic and ecological effects. - *Zh. Obsch. Biol.* Vol.57. N 4. P.421-439. (in Russian, English summary)
- Gavrilov V.M. 1997. *Energetics and Avian behavior*. *Physiology and General Biology Reviews*. Amsterdam B.V. Published in The Netherlands by Harwood Academic Publishers GmbH, 225p.
- Gavrilov, V.M. 1999a. Comparative energetics of passerine and non-passerine birds: differences in maximal, potential productive and normal levels of existence metabolism and their ecological implication. In: Adams, N. & Slotow, R. Eds), *Proc. 22 Int. Ornithol. Congr.*, Durban: 338-369, Johannesburg: BirdLife South Africa.
- Gavrilov V.M. 1999b. Energy responses of passerine and non-passerine birds to their thermal environment: differences and ecological effects. *Avian ecology and behaviour*, vol. 3, p. 1-21.
- Gavrilov V.M. 1999c. Ecological phenomena of Passeriformes as a derivative of their energetics, *Acta ornithologica*, , vol.34(2): 165-172.
- Gavrilov V.M. 2001. Thermoregulation energetics of passerine and non-passerine birds. *Ornithologia*. Vol.29. P.162-182.
- Gavrilov, V.M., Dolnik, V.R. 1985. Basal metabolism, thermoregulation and existence energy in birds: world data. In *Acta XVIII Congress Internationalis Ornithologici*, (Ilyichov, V.D. and Gavrilov, V.M., eds.) vol.1, 421-466 (Moscow: Nauka).
- Gavrilov V.M., A.B. Kerimov, T.B. Golubeva, E.V. Ivankina, T.A. Ilyina. 1998. Population and ecological effects of variation and interaction of energetic parameters in birds with special reference to Great Tit (*Parus major*) and Pied Flycatcher (*Ficedula hypoleuca*). *Avian ecology and behaviour*, vol. 1, pp. 87-101.
