# Supplementary material
Source: PubMed Central journal article supplement (PMC2579366)
Supplement: 0802148105_DS7_PDF.pdf [file 0802148105_DS7_PDF.pdf]

## Dataset S7. Dark respiration rates in cyanobacteria

Notes to Table **S7**:

Data on dark respiration rates in cyanobacteria (unicellular, filamentous and mat-forming species) are presented. Taxonomic status (the “**Order**” column) was determined for each genus following [www.algaebase.org](http://www.algaebase.org).

Abbreviations and universal conversions: DM – dry mass; WM – wet mass; N – nitrogen mass; Chl a – Chl a mass; C – carbon mass; Pr – protein mass; X/Y – X by Y mass ratio in the cell, e.g. DM/WM is the ratio of dry to wet cell mass;  $1 \text{ W} = 1 \text{ J s}^{-1}$ ;  $1 \text{ mol O}_2 = 32 \text{ g O}_2$ .

Column “**U**” (mass units of respiration rate measurements): D – dry mass or Chl a mass with known Chl a/DM ratio; W – wet mass without information on DM/WM ratio; Chl – chlorophyll mass without information on Chl a/DM ratio; Pr – protein mass.

“**Original units**” are the units of dark respiration rate measurements as given in the original publication (“**Source**”); **qou** is the numeric value of dark respiration rate in the original units. E.g., if it is “ $\text{mg O}_2 (\text{g DM})^{-1} \text{ hr}^{-1}$ ” in the column “**Original units**” and “1.1” in the column “**qou**”, this means that dark respiration rate of the corresponding species, as given in the original publication indicated in the column “**Source**”, is  $1.1 \text{ mg O}_2 (\text{g DM})^{-1} \text{ hr}^{-1}$ .

**qWkg** is the original dark respiration rate **qou** converted to W ( $\text{kg WM})^{-1}$  (Watts per kg wet mass) using the following conversion factors: C/DM = 0.5 (Kratz & Myers 1955; Bratbak & Dundas 1984; Gordillo et al. 1999; Stal & Moezelaar 1997), Chl a/DM = 0.015 (APHA 1992), Pr/DM = 0.5 (Otte et al. 1999; Zubkov et al. 1999; Stal & Moezelaar 1997) and DM/WM = 0.3 as a crude mean for all taxa applied in the analysis (SI Methods, Table S12a). If the Chl a/DM ratio is known (shown in the “**Comments**” column), while **qou** is per unit Chl a mass, the dark respiration rate is first calculated per unit dry mass and then converted to **qWkg** using the reference DM/WM = 0.3. Energy conversion:  $1 \text{ ml O}_2 = 20 \text{ J}$ .

**TC** is ambient temperature during measurements, degrees Celsius.

**q25Wkg** is dark respiration rate converted to 25 °C using  $Q_{10} = 2$ ,  $\text{q25Wkg} = \text{qWkg} \times 2^{(25 - \text{TC})/10}$ , dimension W ( $\text{kg WM})^{-1}$ . For each species rows are arranged in the order of increasing **q25Wkg**.

**Mpg**: estimated cell mass, pg ( $1 \text{ pg} = 10^{-12} \text{ g}$ ). In most cases it is estimated from linear dimensions (using geometric mean of the available linear size range) assuming spherical cell shape. For filamentous cyanobacteria **Mpg** is estimated from linear width as if it were a spherical cell of the same diameter, to be comparable to unicellular species. As argued in the paper, for plant it is the minimal linear

size (e.g., leaf thickness) rather than total mass that is energetically relevant. Square brackets around **Mpg** value indicate that this value was obtained from a different source than the source of dark respiration rate data. When converting cell volume to cell mass, cell density of  $1 \text{ g ml}^{-1}$  was assumed.

**Source:** the first, unbracketed reference in this column is where the value of **qou** is taken from; references and data in square brackets refer to cell size determination.

**Comments:** this column provides relevant information on culture conditions and cellular composition of the studied species. C/N — carbon to cell nitrogen mass ratio; C/DM — carbon mass to dry mass ratio; DM/WM — dry mass to wet mass ratio; DM/V — dry mass to volume ratio ( $\text{pg}/\mu\text{m}^3$ ); C/Chl — carbon to chlorophyll mass ratio; C/V — carbon mass to cell volume ratio ( $\text{pg}/\mu\text{m}^3$ ); C/cell — C per cell ( $\text{pg}/\text{cell}$ ); Pr/cell — pg protein per cell ( $\text{pg}/\text{cell}$ ); AFDM/WM — ash-free dry mass to wet mass ratio; ODM — organic dry matter.

$\text{Log}_{10}$ -transformed values of **q25Wkg** ( $\text{W (kg WM)}^{-1}$ ), minimum for each species, were used in the analyses shown in Figures 1 and 2 and Table 1 in the paper (a total of 25 values for  $n = 25$  species). The corresponding rows are highlighted in blue.

References within Table **S7** to Tables, Figures etc. refer to the corresponding items in the original literature indicated in the **Source** column.

Table **S7**. Dark respiration rates in cyanobacteria.

| Species                       | U   | Original units                                           | qou | qWkg | q25Wkg | TC | Mpg  | Order      | Source                                                                                                                                                                                                                                                                                                      | Comments                                               |
|-------------------------------|-----|----------------------------------------------------------|-----|------|--------|----|------|------------|-------------------------------------------------------------------------------------------------------------------------------------------------------------------------------------------------------------------------------------------------------------------------------------------------------------|--------------------------------------------------------|
| 1. <i>Anabaena flos-aquae</i> | Chl | $\mu\text{mol O}_2 (\text{mg Chl})^{-1} \text{ hr}^{-1}$ | 2.4 | 1.3  | 1.30   | 25 | [22] | Nostocales | Rubin et al. 1977<br>[estimated from images at UTEX Culture Collection ( <a href="http://www.zo.utexas.edu/research/utex/">http://www.zo.utexas.edu/research/utex/</a> ), diam 3.5 $\mu\text{m}$ , filamentous]                                                                                             |                                                        |
| 2. <i>Anabaena variabilis</i> | D   | $\mu\text{l O}_2 (\text{mg DM})^{-1} \text{ hr}^{-1}$    | 1.7 | 2.8  | 1.06   | 39 | [14] | Nostocales | Kratz & Myers 1955<br>[estimated from image of ATCC 29413, diam 3 $\mu\text{m}$ , filamentous, displayed at <a href="http://www.ibvf.cartuja.csic.es/Cultivos/Seccion_IV.htm">http://www.ibvf.cartuja.csic.es/Cultivos/Seccion_IV.htm</a> (Instituto de Bioquímica Vegetal y Fotosíntesis, Cevilla, Spain)] | Cells stored in darkness for 24 hr before measurements |

|    |                                                          |    |                                                                 |     |     |       |    |      |               |                                                                                                                                                                                                                                                                                                               |                                                                                                                                                                                                                                         |
|----|----------------------------------------------------------|----|-----------------------------------------------------------------|-----|-----|-------|----|------|---------------|---------------------------------------------------------------------------------------------------------------------------------------------------------------------------------------------------------------------------------------------------------------------------------------------------------------|-----------------------------------------------------------------------------------------------------------------------------------------------------------------------------------------------------------------------------------------|
| 3. | Anabaena variabilis                                      | D  | $\mu\text{l O}_2 (\text{mg DM})^{-1} \text{hr}^{-1}$            | 8.4 | 14  | 5.31  | 39 | [14] | Nostocales    | Kratz & Myers 1955<br>[estimated from image of ATCC 29413, diam 3 $\mu\text{m}$ , filamentous, displayed at <a href="http://www.ibvf.cartuja.csic.es/Cultivos/Seccion_IV.htm">http://www.ibvf.cartuja.csic.es/Cultivos/Seccion_IV.htm</a> (Instituto de Bioquímica Vegetal y Fotosíntesis, Cevilla, Spain)]   | growing cells ( $\log_{10}\text{k/day}= 0.55$ ) harvested and prepared for dark respiration measurements in less than 35 min                                                                                                            |
| 4. | Anabaena variabilis                                      | Pr | $\mu\text{mol O}_2 (95 \text{ mg protein})^{-1} \text{hr}^{-1}$ | 93  | 18  | 19.29 | 24 | [14] | Nostocales    | Haury & Spiller 1981<br>[estimated from image of ATCC 29413, diam 3 $\mu\text{m}$ , filamentous, displayed at <a href="http://www.ibvf.cartuja.csic.es/Cultivos/Seccion_IV.htm">http://www.ibvf.cartuja.csic.es/Cultivos/Seccion_IV.htm</a> (Instituto de Bioquímica Vegetal y Fotosíntesis, Cevilla, Spain)] | protein/packed cell volume=95 mg/ml<br>Chl/packed cell volume=3.4 mg/ml;<br>carbon-starved; respiration is characterized as "high" compared to the strain studied by Kratz & Myers (1955)                                               |
| 5. | Anacystis nidulans PCC 6301 (Synechococcus leopoliensis) | D  | $\mu\text{l O}_2 (\text{mg DM})^{-1} \text{hr}^{-1}$            | 0.3 | 0.5 | 0.50  | 25 | [4]  | Chroococcales | Kratz & Myers 1955<br>[estimated from linear dimensions 1.6x2.2 $\mu\text{m}$ assuming cylindrical form]                                                                                                                                                                                                      | C/DM=0.483<br>H/DM=0.067<br>N/DM=0.094<br>ash/DM=0.044<br>[when grown at $\log_{10}\text{k/day}=1.0$ ];<br>cells stored in darkness for 24 hr before measurements                                                                       |
| 6. | Anacystis nidulans PCC 6301 (Synechococcus leopoliensis) | D  | $\mu\text{l O}_2 (\text{mg DM})^{-1} \text{hr}^{-1}$            | 1.9 | 3.2 | 1.21  | 39 | [4]  | Chroococcales | Kratz & Myers 1955<br>[estimated from linear dimensions 1.6x2.2 $\mu\text{m}$ assuming cylindrical form]                                                                                                                                                                                                      | C/DM=0.483<br>H/DM=0.067<br>N/DM=0.094<br>ash/DM=0.044<br>[when grown at $\log_{10}\text{k/day}=1.0$ ];<br>cells stored in darkness for 24 hr before measurements                                                                       |
| 7. | Anacystis nidulans PCC 6301 (Synechococcus leopoliensis) | D  | $\mu\text{l O}_2 (\text{mg DM})^{-1} \text{hr}^{-1}$            | 1.6 | 2.7 | 2.70  | 25 | [4]  | Chroococcales | Kratz & Myers 1955<br>[estimated from linear dimensions 1.6x2.2 $\mu\text{m}$ assuming cylindrical form]                                                                                                                                                                                                      | C/DM=0.483<br>H/DM=0.067<br>N/DM=0.094<br>ash/DM=0.044<br>[when grown at $\log_{10}\text{k/day}=1.0$ ];<br>growing cells ( $\log_{10}\text{k/day}= 0.3$ ) harvested and prepared for dark respiration measurements in less than 35 min  |
| 8. | Anacystis nidulans PCC 6301 (Synechococcus leopoliensis) | D  | $\mu\text{l O}_2 (\text{mg DM})^{-1} \text{hr}^{-1}$            | 4.7 | 7.8 | 2.96  | 39 | [4]  | Chroococcales | Kratz & Myers 1955<br>[estimated from linear dimensions 1.6x2.2 $\mu\text{m}$ assuming cylindrical form]                                                                                                                                                                                                      | C/DM=0.483<br>H/DM=0.067<br>N/DM=0.094<br>ash/DM=0.044<br>[when grown at $\log_{10}\text{k/day}=1.0$ ];<br>growing cells ( $\log_{10}\text{k/day}= 0.55$ ) harvested and prepared for dark respiration measurements in less than 35 min |

|                                                                              |     |                                                              |         |      |       |    |      |                        |                                                                                                                                         |                                                                                                                                                                                                                                                 |
|------------------------------------------------------------------------------|-----|--------------------------------------------------------------|---------|------|-------|----|------|------------------------|-----------------------------------------------------------------------------------------------------------------------------------------|-------------------------------------------------------------------------------------------------------------------------------------------------------------------------------------------------------------------------------------------------|
| 9. <i>Anacystis nidulans</i> PCC 6301 ( <i>Synechococcus leopoliensis</i> )  | D   | $\mu\text{l O}_2 \text{ (mg DM)}^{-1} \text{ hr}^{-1}$       | 7.5     | 12.5 | 4.74  | 39 | [4]  | Chroococcales          | Kratz & Myers 1955 [estimated from linear dimensions 1.6×2.2 $\mu\text{m}$ assuming cylindrical form]                                   | C/DM=0.483<br>H/DM=0.067<br>N/DM=0.094<br>ash/DM=0.044<br>[when grown at $\log_{10}k/\text{day}=1.0$ ];<br>growing cells ( $\log_{10}k/\text{day}=2.50$ )<br>harvested and prepared for dark<br>respiration measurements in<br>less than 35 min |
| 10. <i>Anacystis nidulans</i> PCC 6301 ( <i>Synechococcus leopoliensis</i> ) | D   | $\mu\text{l O}_2 \text{ (mg DM)}^{-1} \text{ hr}^{-1}$       | 2.9     | 4.8  | 4.80  | 25 | [4]  | Chroococcales          | Kratz & Myers 1955 [estimated from linear dimensions 1.6×2.2 $\mu\text{m}$ assuming cylindrical form]                                   | C/DM=0.483<br>H/DM=0.067<br>N/DM=0.094<br>ash/DM=0.044<br>[when grown at $\log_{10}k/\text{day}=1.0$ ];<br>cells stored in darkness for 24 hr<br>before measurements<br>nitrogen-deprived cells                                                 |
| 11. <i>Anacystis nidulans</i> PCC 6301 ( <i>Synechococcus leopoliensis</i> ) | Chl | $\mu\text{mol O}_2 \text{ (mg Chl)}^{-1} \text{ hr}^{-1}$    | 32      | 18   | 6.36  | 40 | [4]  | Chroococcales          | Romero et al. 1989 [estimated from linear dimensions 1.6×2.2 $\mu\text{m}$ (Kratz & Myers 1955) assuming cylindrical form]              |                                                                                                                                                                                                                                                 |
| 12. <i>Anacystis nidulans</i> PCC 6301 ( <i>Synechococcus leopoliensis</i> ) | Chl | $\mu\text{mol O}_2 \text{ (mg Chl)}^{-1} \text{ hr}^{-1}$    | 41      | 23   | 8.13  | 40 | [4]  | Chroococcales          | Romero et al. 1989 [estimated from linear dimensions 1.6×2.2 $\mu\text{m}$ (Kratz & Myers 1955) assuming cylindrical form]              | KNO <sub>3</sub> added                                                                                                                                                                                                                          |
| 13. <i>Anacystis nidulans</i> PCC 6301 ( <i>Synechococcus leopoliensis</i> ) | D   | $\mu\text{l O}_2 \text{ (mg DM)}^{-1} \text{ hr}^{-1}$       | 4.3-5.9 | 8.5  | 8.50  | 25 | [4]  | Chroococcales          | Biggins 1969 [estimated from linear dimensions 1.6×2.2 $\mu\text{m}$ (Kratz & Myers 1955) assuming cylindrical form]                    | stable respiration during 8 hr in<br>darkness                                                                                                                                                                                                   |
| 14. <i>Anacystis nidulans</i> PCC 6301 ( <i>Synechococcus leopoliensis</i> ) | D   | $\mu\text{l O}_2 \text{ (mg DM)}^{-1} \text{ (40 min)}^{-1}$ | 10      | 25   | 9.47  | 39 | [4]  | Chroococcales          | Doolittle & Singer 1974, Fig. 6 [estimated from linear dimensions 1.6×2.2 $\mu\text{m}$ (Kratz & Myers 1955) assuming cylindrical form] | DM/cell=1.1 pg; cells harvested<br>in log-phase                                                                                                                                                                                                 |
| 15. <i>Anacystis nidulans</i> PCC 6301 ( <i>Synechococcus leopoliensis</i> ) | Chl | $\mu\text{mol O}_2 \text{ (mg Chl)}^{-1} \text{ hr}^{-1}$    | 51      | 29   | 10.25 | 40 | [4]  | Chroococcales          | Romero et al. 1989 [estimated from linear dimensions 1.6×2.2 $\mu\text{m}$ (Kratz & Myers 1955) assuming cylindrical form]              | NH <sub>4</sub> Cl added                                                                                                                                                                                                                        |
| 16. <i>Aphanocapsa</i> PCC 6714                                              | W   | $\text{nmol O}_2 \text{ (mg WM)}^{-1} \text{ min}^{-1}$      | <0.02   | 0.15 | 0.15  | 25 | [10] | <i>Synechococcales</i> | Pelroy & Bassham 1973 [Stanier et al. 1971, Fig. 6]                                                                                     | stabilized respiration of cells<br>harvested during late-log phase                                                                                                                                                                              |
| 17. <i>Coccochloris penicystis</i>                                           | Chl | $\mu\text{mol O}_2 \text{ (mg Chl)}^{-1} \text{ hr}^{-1}$    | 32.3    | 18   | 6.36  | 40 | [1]  | Chroococcales          | Coleman & Colman 1980 [Stanier et al. 1971, Fig. 2 PCC 6307, ellipsoid 1×2 $\mu\text{m}$ ]                                              |                                                                                                                                                                                                                                                 |
| 18. <i>Coccochloris penicystis</i>                                           | Chl | $\mu\text{mol O}_2 \text{ (mg Chl)}^{-1} \text{ hr}^{-1}$    | 24.4    | 14   | 9.90  | 30 | [1]  | Chroococcales          | Coleman & Colman 1980 [Stanier et al. 1971, Fig. 2 PCC 6307, ellipsoid 1×2 $\mu\text{m}$ ]                                              |                                                                                                                                                                                                                                                 |

|                                              |     |                                                                           |       |     |       |    |       |               |                                                                                                                                                                                                                      |                                                                                                     |
|----------------------------------------------|-----|---------------------------------------------------------------------------|-------|-----|-------|----|-------|---------------|----------------------------------------------------------------------------------------------------------------------------------------------------------------------------------------------------------------------|-----------------------------------------------------------------------------------------------------|
| 19. <i>Coccochloris peniocystis</i>          | Chl | $\mu\text{mol O}_2 (\text{mg Chl})^{-1} \text{hr}^{-1}$                   | 15.2  | 8.5 | 12.02 | 20 | [1]   | Chroococcales | Coleman & Colman 1980<br>[Stanier et al. 1971, Fig. 2<br>PCC 6307, ellipsoid $1 \times 2$<br>$\mu\text{m}$ ]                                                                                                         |                                                                                                     |
| 20. <i>Gloeobacter violaceus</i>             | Chl | $\mu\text{mol O}_2 (\text{mg Chl})^{-1} \text{hr}^{-1}$                   | 50    | 28  | 28.00 | 25 | [0.7] | Chroococcales | Koenig & Schmidt 1995<br>[Pasteur Culture<br>Collection, <a href="http://www.pasteur.fr">www.pasteur.fr</a> ,<br>width/diameter $1-1.2 \mu\text{m}$ ]                                                                |                                                                                                     |
| 21. <i>Gloeotheca</i> sp. PCC 6909           | Pr  | $\mu\text{mol O}_2 (\text{mg protein})^{-1} \text{hr}^{-1}$               | 0.208 | 4   | 5.66  | 20 | [180] | Chroococcales | Ortega-Calvo & Stal 1994<br>[Stanier et al. 1971, Fig. 7,<br>ellipsoid $6 \times 10 \mu\text{m}$ ]                                                                                                                   |                                                                                                     |
| 22. <i>Gloeotheca</i> sp. PCC 6909           | Pr  | $\mu\text{mol O}_2 (\text{mg protein})^{-1} \text{hr}^{-1}$               | 0.696 | 13  | 18.39 | 20 | [180] | Chroococcales | Ortega-Calvo & Stal 1994<br>[Stanier et al. 1971, Fig. 7,<br>ellipsoid $6 \times 10 \mu\text{m}$ ]                                                                                                                   |                                                                                                     |
| 23. <i>Gloeotheca</i> sp. PCC 6909           | Pr  | $\mu\text{mol O}_2 (\text{mg protein})^{-1} \text{hr}^{-1}$               | 0.856 | 16  | 22.63 | 20 | [180] | Chroococcales | Ortega-Calvo & Stal 1994<br>[Stanier et al. 1971, Fig. 7,<br>ellipsoid $6 \times 10 \mu\text{m}$ ]                                                                                                                   |                                                                                                     |
| 24. <i>Gloeotheca</i> sp. PCC 6909           | Pr  | $\mu\text{mol O}_2 (\text{mg protein})^{-1} \text{hr}^{-1}$               | 1.061 | 20  | 28.28 | 20 | [180] | Chroococcales | Ortega-Calvo & Stal 1994<br>[Stanier et al. 1971, Fig. 7,<br>ellipsoid $6 \times 10 \mu\text{m}$ ]                                                                                                                   |                                                                                                     |
| 25. <i>Gloeotheca</i> sp. PCC 6909           | Pr  | $\mu\text{mol O}_2 (\text{mg protein})^{-1} \text{hr}^{-1}$               | 1.714 | 32  | 45.26 | 20 | [180] | Chroococcales | Ortega-Calvo & Stal 1994<br>[Stanier et al. 1971, Fig. 7,<br>ellipsoid $6 \times 10 \mu\text{m}$ ]                                                                                                                   |                                                                                                     |
| 26. <i>Gloeotheca</i> sp. PCC 6909           | Pr  | $\mu\text{mol O}_2 (\text{mg protein})^{-1} \text{hr}^{-1}$               | 1.927 | 36  | 50.91 | 20 | [180] | Chroococcales | Ortega-Calvo & Stal 1994<br>[Stanier et al. 1971, Fig. 7,<br>ellipsoid $6 \times 10 \mu\text{m}$ ]                                                                                                                   |                                                                                                     |
| 27. <i>Gloeotheca</i> sp. PCC 6909           | Pr  | $\mu\text{mol O}_2 (\text{mg protein})^{-1} \text{hr}^{-1}$               | 2.149 | 40  | 56.57 | 20 | [180] | Chroococcales | Ortega-Calvo & Stal 1994<br>[Stanier et al. 1971, Fig. 7,<br>ellipsoid $6 \times 10 \mu\text{m}$ ]                                                                                                                   |                                                                                                     |
| 28. <i>Nostoc commune</i>                    | D   | $\mu\text{mol O}_2 (\text{g WM})^{-1} \text{hr}^{-1}$<br>at DM/WM = 0.067 | 2     | 0.6 | 0.52  | 27 | [8]   | Nostocales    | Scherer et al. 1984<br>[Pereira et al. 2005, Fig. 8,<br>cell width $2.5 \mu\text{m}$ ]                                                                                                                               | Chl a/WM=0.0060-0.0098%;<br>DM/WM=0.067; 6 hrs incubation                                           |
| 29. <i>Nostoc commune</i> var. flagelliforme | D   | $\mu\text{mol O}_2 (\text{g WM})^{-1} \text{hr}^{-1}$<br>at DM/WM = 0.172 | 5.5   | 1.4 | 1.22  | 27 | [8]   | Nostocales    | Scherer et al. 1984<br>[Pereira et al. 2005, Fig. 8,<br>cell width $2.5 \mu\text{m}$ ]                                                                                                                               | DM/WM=0.172; 6 hrs incubation                                                                       |
| 30. <i>Nostoc muscorum</i> G.                | D   | $\mu\text{l O}_2 (\text{mg DM})^{-1} \text{hr}^{-1}$                      | 1.1   | 1.8 | 1.80  | 25 | [33]  | Nostocales    | Kratz & Myers 1955<br>[estimated from images at<br>UTEX Culture Collection<br>( <a href="http://www.zo.utexas.edu/research/utex/">http://www.zo.utexas.edu/research/utex/</a> ), diam $4 \mu\text{m}$ , filamentous] | Cells stored in darkness for 24<br>hr before measurements                                           |
| 31. <i>Nostoc muscorum</i> G.                | D   | $\mu\text{l O}_2 (\text{mg DM})^{-1} \text{hr}^{-1}$                      | 4.4   | 7.3 | 7.30  | 25 | [33]  | Nostocales    | Kratz & Myers 1955<br>[estimated from images at<br>UTEX Culture Collection<br>( <a href="http://www.zo.utexas.edu/research/utex/">http://www.zo.utexas.edu/research/utex/</a> ), diam $4 \mu\text{m}$ , filamentous] | growing cells harvested and<br>prepared for dark respiration<br>measurements in less than 35<br>min |
| 32. <i>Nostoc</i> sp. strain Mac             | D   | $\mu\text{l O}_2 (\text{mg DM})^{-1} \text{hr}^{-1}$                      | 23    | 26  | 9.85  | 39 |       | Nostocales    | Ingram et al. 1973                                                                                                                                                                                                   |                                                                                                     |
| 33. <i>Nostoc</i> sp. strain Mac             | D   | $\mu\text{mol O}_2 (\text{mg DM})^{-1} \text{hr}^{-1}$                    | 0.90  | 34  | 12.88 | 39 |       | Nostocales    | Bottomley & van Baalen<br>1978                                                                                                                                                                                       |                                                                                                     |

|                                                       |   |                                                                                      |         |      |       |    |       |                 |                                                                                                                         |                                                                                                                                                                                                          |
|-------------------------------------------------------|---|--------------------------------------------------------------------------------------|---------|------|-------|----|-------|-----------------|-------------------------------------------------------------------------------------------------------------------------|----------------------------------------------------------------------------------------------------------------------------------------------------------------------------------------------------------|
| 34. <i>Nostoc sphaeroides</i>                         | D | $\mu\text{mol O}_2$ (mg Chl a) <sup>-1</sup><br>hr <sup>-1</sup>                     | 21.3    | 4.5  | 4.50  | 25 |       | Nostocales      | Li & Gao 2004                                                                                                           | Chl a/DM=0.0056<br>DM/WM=0.037;<br>colony diam 0.08 cm                                                                                                                                                   |
| 35. <i>Nostoc sphaeroides</i>                         | D | $\mu\text{mol O}_2$ (mg Chl a) <sup>-1</sup><br>hr <sup>-1</sup>                     | 20.3    | 5.2  | 5.20  | 25 |       | Nostocales      | Li & Gao 2004                                                                                                           | Chl a/DM=0.0068<br>DM/WM=0.013;<br>colony diam 0.30 cm                                                                                                                                                   |
| 36. <i>Nostoc sphaeroides</i>                         | D | $\mu\text{mol O}_2$ (mg Chl a) <sup>-1</sup><br>hr <sup>-1</sup>                     | 23.8    | 7.2  | 7.20  | 25 |       | Nostocales      | Li & Gao 2004                                                                                                           | Chl a/DM=0.0081<br>DM/WM=0.015;<br>colony diam 0.67 cm                                                                                                                                                   |
| 37. <i>Nostoc sphaeroides</i>                         | D | $\mu\text{mol O}_2$ (mg Chl a) <sup>-1</sup><br>hr <sup>-1</sup>                     | 35.7    | 9.5  | 9.50  | 25 |       | Nostocales      | Li & Gao 2004                                                                                                           | Chl a/DM=0.0071<br>DM/WM=0.014;<br>colony diam 0.20 cm                                                                                                                                                   |
| 38. <i>Oscillatoria (Limnothrix) redekei</i> van Goor | C | pg C (pg cell C) <sup>-1</sup><br>day <sup>-1</sup>                                  | 0.13    | 8    | 16.00 | 15 |       | Oscillatoriales | Geider & Osborne 1989<br>(data of Foy & Gibson 1982)                                                                    |                                                                                                                                                                                                          |
| 39. <i>Oscillatoria (Limnothrix) redekei</i> van Goor | C | pg C (pg cell C) <sup>-1</sup><br>day <sup>-1</sup>                                  | 0.18    | 12   | 24.00 | 15 |       | Oscillatoriales | Geider & Osborne 1989<br>(data of Foy & Gibson 1982)                                                                    |                                                                                                                                                                                                          |
| 40. <i>Oscillatoria terebriformis</i>                 | D | $\mu\text{l O}_2$ (mg DM) <sup>-1</sup> hr <sup>-1</sup>                             | 17      | 29   | 7.25  | 45 | 65    | Oscillatoriales | Richardson & Castenholz 1987 [cell diam 5 $\mu\text{m}$ , Fig. 2A, filamentous]                                         | In nature this thermophilic bacterium moves to anaerobic environments during the night, where it can live without external fructose for 3-4 days; survives aerobically in darkness no more than 1-2 days |
| 41. <i>Phormidium autumnale</i> (Ag.) Gom.            | D | mg C (g ash-free DM) <sup>-1</sup> hr <sup>-1</sup>                                  | 0.04    | 0.12 | 0.59  | 2  | [30]  | Oscillatoriales | Davey 1989 [Broady 1991, trichome width 3-5 $\mu\text{m}$ ]                                                             | Ash/DM=0.60; AFDM/WM=0.04-0.067                                                                                                                                                                          |
| 42. <i>Phormidium autumnale</i> (Ag.) Gom.            | D | mg C (g ash-free DM) <sup>-1</sup> hr <sup>-1</sup>                                  | 0.07    | 0.21 | 0.84  | 5  | [30]  | Oscillatoriales | Davey 1989 [Broady 1991, trichome width 3-5 $\mu\text{m}$ ]                                                             | Ash/DM=0.60; AFDM/WM=0.04-0.067                                                                                                                                                                          |
| 43. <i>Phormidium autumnale</i> (Ag.) Gom.            | D | mg C (g ash-free DM) <sup>-1</sup> hr <sup>-1</sup>                                  | 0.1     | 0.3  | 0.85  | 10 | [30]  | Oscillatoriales | Davey 1989 [Broady 1991, trichome width 3-5 $\mu\text{m}$ ]                                                             | Ash/DM=0.60; AFDM/WM=0.04-0.067                                                                                                                                                                          |
| 44. <i>Phormidium autumnale</i> (Ag.) Gom.            | D | mg C (g ash-free DM) <sup>-1</sup> hr <sup>-1</sup>                                  | 0.17    | 0.5  | 1.00  | 15 | [30]  | Oscillatoriales | Davey 1989 [Broady 1991, trichome width 3-5 $\mu\text{m}$ ]                                                             | Ash/DM=0.60; AFDM/WM=0.04-0.067                                                                                                                                                                          |
| 45. <i>Phormidium autumnale</i> (Ag.) Gom.            | D | mg C (g ash-free DM) <sup>-1</sup> hr <sup>-1</sup>                                  | 0.3     | 0.9  | 1.27  | 20 | [30]  | Oscillatoriales | Davey 1989 [Broady 1991, trichome width 3-5 $\mu\text{m}$ ]                                                             | Ash/DM=0.60; AFDM/WM=0.04-0.067                                                                                                                                                                          |
| 46. <i>Phormidium luridum</i>                         | D | $\mu\text{l O}_2$ (mg DM) <sup>-1</sup> hr <sup>-1</sup>                             | 4.3-5.9 | 8.5  | 8.50  | 25 | [4.4] | Oscillatoriales | Biggins 1969 [Pasteur Culture Collection, www.pasteur.fr, PCC 7602, width/diameter 1.8-2.3 $\mu\text{m}$ , filamentous] | stable respiration during 8 hr in darkness                                                                                                                                                               |
| 47. <i>Planktothrix agardhii</i>                      | D | mg O <sub>2</sub> (mg Chl a) <sup>-1</sup><br>hr <sup>-1</sup> at Chl a/ODM = 0.0075 | 0.613   | 5.4  | 7.64  | 20 | [19]  | Oscillatoriales | Fietz & Nicklisch 2002 [Tonk et al. 2005, diam of filaments 3.3 $\mu\text{m}$ ]                                         | ODM/V=0.42<br>C/N=4.0<br>C/ODM=0.42<br>Chl a/ODM=0.0075-0.0088;<br>dark respiration measured for 20 min                                                                                                  |

|                                                                       |     |                                                                  |       |     |        |    |        |                 |                                                                                                                  |                                                                                                                         |
|-----------------------------------------------------------------------|-----|------------------------------------------------------------------|-------|-----|--------|----|--------|-----------------|------------------------------------------------------------------------------------------------------------------|-------------------------------------------------------------------------------------------------------------------------|
| 48. <i>Plectonema boryanum</i>                                        | Pr  | nmol O <sub>2</sub> (mg protein) <sup>-1</sup> min <sup>-1</sup> | 5     | 5.6 | 5.23   | 26 | [4.4]  | Oscillatoriales | Padan et al. 1971 [Pasteur Culture Collection, www.pasteur.fr, PCC 6306, width/diameter 1.8-2.3 μm, filamentous] | respiration of log-harvested cells after incubation for several hr in darkness; stable for several days                 |
| 49. <i>Plectonema boryanum</i>                                        | Pr  | nmol O <sub>2</sub> (mg protein) <sup>-1</sup> min <sup>-1</sup> | 15-20 | 20  | 18.66  | 26 | [4.4]  | Oscillatoriales | Padan et al. 1971 [Pasteur Culture Collection, www.pasteur.fr, PCC 6306, width/diameter 1.8-2.3 μm, filamentous] | respiration of log-harvested cells immediately after harvest                                                            |
| 50. <i>Plectonema boryanum</i>                                        | Pr  | nmol O <sub>2</sub> (mg protein) <sup>-1</sup> min <sup>-1</sup> | 55    | 62  | 57.85  | 26 | [4.4]  | Oscillatoriales | Padan et al. 1971 [Pasteur Culture Collection, www.pasteur.fr, PCC 6306, width/diameter 1.8-2.3 μm, filamentous] | maximum respiration of log-harvested after light incubation in optimal conditions for 8-10 hr                           |
| 51. <i>Prochloron</i> sp. (isolated from <i>Lissoclinum patella</i> ) | Chl | μmol O <sub>2</sub> (mg Chl) <sup>-1</sup> min <sup>-1</sup>     | 0.9   | 30  | 24.37  | 28 | [5600] | Chroococcales   | Alberte et al. 1986 [Cox 1986, Fig. 26, diam 22 μm]                                                              | Chl/cell=5.5 pg; low-light culture                                                                                      |
| 52. <i>Prochloron</i> sp. (isolated from <i>Lissoclinum patella</i> ) | Chl | μmol O <sub>2</sub> (mg Chl) <sup>-1</sup> min <sup>-1</sup>     | 3.8   | 127 | 103.16 | 28 | [5600] | Chroococcales   | Alberte et al. 1986 [Cox 1986, Fig. 26, diam 22 μm]                                                              | Chl/cell=2.7 pg; low-light culture                                                                                      |
| 53. <i>Schizothrix calcicola</i>                                      | Chl | mg O <sub>2</sub> (mg Chl a) <sup>-1</sup> hr <sup>-1</sup>      | 0.58  | 10  | 10.00  | 25 |        | Oscillatoriales | Tang & Vincent 2000                                                                                              | Mat-forming Arctic species; daylength 8 hr                                                                              |
| 54. <i>Schizothrix calcicola</i>                                      | Chl | mg O <sub>2</sub> (mg Chl a) <sup>-1</sup> hr <sup>-1</sup>      | 0.49  | 8.5 | 17.00  | 15 |        | Oscillatoriales | Tang & Vincent 2000                                                                                              | Mat-forming Arctic species; daylength 8 hr                                                                              |
| 55. <i>Schizothrix calcicola</i>                                      | Chl | mg O <sub>2</sub> (mg Chl a) <sup>-1</sup> hr <sup>-1</sup>      | 1.38  | 24  | 24.00  | 25 |        | Oscillatoriales | Tang & Vincent 2000                                                                                              | Mat-forming Arctic species; daylength 24 hr                                                                             |
| 56. <i>Schizothrix calcicola</i>                                      | Chl | mg O <sub>2</sub> (mg Chl a) <sup>-1</sup> hr <sup>-1</sup>      | 0.99  | 17  | 34.00  | 15 |        | Oscillatoriales | Tang & Vincent 2000                                                                                              | Mat-forming Arctic species; daylength 24 hr                                                                             |
| 57. <i>Spirulina platensis</i> Compère 1968-3786                      | D   | μmol O <sub>2</sub> (mg Chl a) <sup>-1</sup> hr <sup>-1</sup>    | 46    | 9   | 9.00   | 25 | [180]  | Chroococcales   | Gordillo et al. 1999 [Ciferri 1983, cell diameter 6-8 μm, filamentous]                                           | C/DM=0.697<br>N/DM=0.045<br>Chl a/DM=0.0053<br>soluble proteins/DM=0.083<br>nitrogen-limited, normal CO <sub>2</sub>    |
| 58. <i>Spirulina platensis</i> Compère 1968-3786                      | D   | μmol O <sub>2</sub> (mg Chl a) <sup>-1</sup> hr <sup>-1</sup>    | 116   | 15  | 15.00  | 25 | [180]  | Chroococcales   | Gordillo et al. 1999 [Ciferri 1983, cell diameter 6-8 μm, filamentous]                                           | C/DM=0.583<br>N/DM=0.042<br>Chl a/DM=0.0035<br>soluble proteins/DM=0.070;<br>nitrogen-unlimited, high CO <sub>2</sub>   |
| 59. <i>Spirulina platensis</i> Compère 1968-3786                      | D   | μmol O <sub>2</sub> (mg Chl a) <sup>-1</sup> hr <sup>-1</sup>    | 33    | 19  | 19.00  | 25 | [180]  | Chroococcales   | Gordillo et al. 1999 [Ciferri 1983, cell diameter 6-8 μm, filamentous]                                           | C/DM=0.513<br>N/DM=0.108<br>Chl a/DM=0.0153<br>soluble proteins/DM=0.197;<br>nitrogen-unlimited, high CO <sub>2</sub>   |
| 60. <i>Spirulina platensis</i> Compère 1968-3786                      | D   | μmol O <sub>2</sub> (mg Chl a) <sup>-1</sup> hr <sup>-1</sup>    | 31    | 25  | 25.00  | 25 | [180]  | Chroococcales   | Gordillo et al. 1999 [Ciferri 1983, cell diameter 6-8 μm, filamentous]                                           | C/DM=0.574<br>N/DM=0.131<br>Chl a/DM=0.0215<br>soluble proteins/DM=0.285;<br>nitrogen-unlimited, normal CO <sub>2</sub> |
| 61. <i>Spirulina platensis</i> P 511                                  | Chl | μmol O <sub>2</sub> (mg Chl a) <sup>-1</sup> hr <sup>-1</sup>    | 33    | 18  | 12.73  | 30 | [180]  | Chroococcales   | Berry et al. 2003 [Ciferri 1983, cell diameter 6-8 μm, filamentous]                                              | 100 mM NaCl + 50 μM DBIMB                                                                                               |

|                                              |     |                                                                                                          |       |     |        |      |       |                 |                                                                                                          |                                                                                                                                                                                                                                                                                 |
|----------------------------------------------|-----|----------------------------------------------------------------------------------------------------------|-------|-----|--------|------|-------|-----------------|----------------------------------------------------------------------------------------------------------|---------------------------------------------------------------------------------------------------------------------------------------------------------------------------------------------------------------------------------------------------------------------------------|
| 62. <i>Spirulina platensis</i> P 511         | Chl | $\mu\text{mol O}_2 \text{ (mg Chl a)}^{-1} \text{ hr}^{-1}$                                              | 45    | 25  | 17.68  | 30   | [180] | Chroococcales   | Berry et al. 2003 [Ciferri 1983, cell diameter 6-8 $\mu\text{m}$ , filamentous]                          | 100 mM KCl                                                                                                                                                                                                                                                                      |
| 63. <i>Spirulina platensis</i> P 511         | Chl | $\mu\text{mol O}_2 \text{ (mg Chl a)}^{-1} \text{ hr}^{-1}$                                              | 62    | 35  | 24.75  | 30   | [180] | Chroococcales   | Berry et al. 2003 [Ciferri 1983, cell diameter 6-8 $\mu\text{m}$ , filamentous]                          | 100 mM NaCl + 10 mM NaHCO <sub>3</sub>                                                                                                                                                                                                                                          |
| 64. <i>Spirulina platensis</i> P 511         | Chl | $\mu\text{mol O}_2 \text{ (mg Chl a)}^{-1} \text{ hr}^{-1}$                                              | 64    | 36  | 25.46  | 30   | [180] | Chroococcales   | Berry et al. 2003 [Ciferri 1983, cell diameter 6-8 $\mu\text{m}$ , filamentous]                          | 100 mM NaCl                                                                                                                                                                                                                                                                     |
| 65. <i>Synechococcus</i> sp. RF-1 (PCC 8801) | Chl | $\text{nmol O}_2 \text{ (10}^9 \text{ cells)}^{-1} \text{ min}^{-1}$ at 15 $\mu\text{g Chl a cell}^{-1}$ | 3     | 2   | 1.74   | 27   | [14]  | Chroococcales   | Chen et al. 1989 [Pasteur Culture Collection, www.pasteur.fr, PCC 8801, width/diameter 3 $\mu\text{m}$ ] | Chl a/cell=0.15 pg                                                                                                                                                                                                                                                              |
| 66. <i>Synechocystis aquatilis</i>           | Chl | $\mu\text{mol O}_2 \text{ (mg Chl a)}^{-1} \text{ hr}^{-1}$                                              | 61.8  | 34  | 24.04  | 30   | 8     | Chroococcales   | de Magalhães et al. 2004 [Fig. 6C, cells nearly spherical ~2.5 $\mu\text{m}$ in diam]                    | 0.11-0.23 $\mu\text{g Chl a}$ per 10 <sup>6</sup> cells; control cells (not zinc-treated); isolated in Brasil                                                                                                                                                                   |
| 67. <i>Synechocystis</i> PCC 6803            | Chl | $\text{mmol O}_2 \text{ (g Chl a)}^{-1} \text{ (30 s)}^{-1}$                                             | 0.036 | 2.4 | 2.40   | 25   | [8]   | Chroococcales   | Avendaño-Coletta & Schubert 2005 [Stanier et al. 1971, Fig. 5, sphere diam 2.5 $\mu\text{m}$ ]           | Dark respiration during the first 30 s of 5min:5min light:dark regime at 200 $\mu\text{mol photons m}^{-2} \text{ s}^{-1}$ ; dark respiration rates at 5:5 and 10:10 regimes and other photon densities (25, 35 and 100) are up to 7 W kg <sup>-1</sup> [total 12 data entries] |
| 68. <i>Synechocystis</i> PCC 6803            | Chl | $\mu\text{mol O}_2 \text{ (mg Chl)}^{-1} \text{ hr}^{-1}$                                                | 43    | 24  | 20.89  | 27   | [8]   | Chroococcales   | Hammouda & El-Sheekh 1994 [Stanier et al. 1971, Fig. 5, sphere diam 2.5 $\mu\text{m}$ ]                  |                                                                                                                                                                                                                                                                                 |
| 69. <i>Trichodesmium</i> spp.                | D   | $\text{mg O}_2 \text{ (mg Chl a)}^{-1} \text{ hr}^{-1}$                                                  | 2.41  | 7   | 5.27   | 29.1 | [785] | Oscillatoriales | Carpenter & Roenneberg 1995 [Carpenter et al. 2004, Table 10]                                            | Chl a/colony=50 ng<br>C/colony=10 $\mu\text{g}$<br>This means C/Chl a=200 and DM/Chl a=400, see also Trichodesmium Note; September natural day/night light regime                                                                                                               |
| 70. <i>Trichodesmium</i> spp.                | D   | $\text{mg O}_2 \text{ (mg Chl a)}^{-1} \text{ hr}^{-1}$                                                  | 4.93  | 14  | 10.76  | 28.8 | [785] | Oscillatoriales | Carpenter & Roenneberg 1995 [Carpenter et al. 2004, Table 10]                                            | Chl a/colony=50 ng<br>C/colony=10 $\mu\text{g}$<br>This means C/Chl a=200 and DM/Chl a=400, see also Trichodesmium Note                                                                                                                                                         |
| 71. <i>Trichodesmium</i> spp.                | D   | $\text{mg O}_2 \text{ (mg Chl a)}^{-1} \text{ hr}^{-1}$                                                  | 17.6  | 51  | 49.26  | 25.5 | [785] | Oscillatoriales | Carpenter & Roenneberg 1995 [Carpenter et al. 2004, Table 10]                                            | Chl a/colony=50 ng<br>C/colony=10 $\mu\text{g}$<br>This means C/Chl a=200 and DM/Chl a=400, see also Trichodesmium Note                                                                                                                                                         |
| 72. <i>Trichodesmium</i> spp.                | Chl | $\text{mg O}_2 \text{ (mg Chl a)}^{-1} \text{ hr}^{-1}$                                                  | 12.5  | 218 | 189.78 | 27   | [785] | Oscillatoriales | Roenneberg & Carpenter 1993 [Carpenter et al. 2004, Table 10]                                            | calculated assumed DM/Chl a=67, but see Trichodesmium Note                                                                                                                                                                                                                      |



|                               |     |                                                                |      |     |        |    |       |                 |                                                                     |                                                                         |
|-------------------------------|-----|----------------------------------------------------------------|------|-----|--------|----|-------|-----------------|---------------------------------------------------------------------|-------------------------------------------------------------------------|
| 73. <i>Trichodesmium</i> spp. | Chl | mg O <sub>2</sub> (mg Chl a) <sup>-1</sup><br>hr <sup>-1</sup> | 13.4 | 233 | 202.84 | 27 | [785] | Oscillatoriales | Roenneberg & Carpenter<br>1993 [Carpenter et al.<br>2004, Table 10] | calculated assumed DM/Chl<br>a=67, but see <i>Trichodesmium</i><br>Note |
| 74. <i>Trichodesmium</i> spp. | Chl | mg O <sub>2</sub> (mg Chl a) <sup>-1</sup><br>hr <sup>-1</sup> | 18.0 | 313 | 272.48 | 27 | [785] | Oscillatoriales | Roenneberg & Carpenter<br>1993 [Carpenter et al.<br>2004, Table 10] | calculated assumed DM/Chl<br>a=67, but see <i>Trichodesmium</i><br>Note |
| 75. <i>Trichodesmium</i> spp. | Chl | mg O <sub>2</sub> (mg Chl a) <sup>-1</sup><br>hr <sup>-1</sup> | 26.9 | 468 | 407.42 | 27 | [785] | Oscillatoriales | Roenneberg & Carpenter<br>1993 [Carpenter et al.<br>2004, Table 10] | calculated assumed DM/Chl<br>a=67, but see <i>Trichodesmium</i><br>Note |

### Note on Chl a content in *Trichodesmium*

LaRoche and Breitbarth (2005) in their Table 1 give Chl a/C=96.5-320 μmol/mol. This corresponds to the C/Chl a mass ratio from 42 to 139 (assuming Chl a molar mass of 893.5 g/mol). LaRoche and Breitbarth (2005) refer to <http://www.nioz.nl/projects/ironages> for text and references. In Appendix 7, based on data of Berman-Frank et al. (2001), values of 0.018, 0.17, 0.19, 0.25 and 0.29 μg/μmol are listed for the Chl a/C ratio in *Trichodesmium*. This corresponds to C/Chl a mass ratio from 667 to 41.4.

However, in Appendix 2b of LaRoche and Breitbarth (2005), according to the data of Mague et al. (1977), carbon content per colony is 9.7×10<sup>3</sup> ng, while Chl a content is 34 μg/colony. This gives a mass ratios C/Chl a=285. This is consistent with data obtained by Carpenter (1983) as cited by Carpenter and Roenneberg (1995): 10 μg C/colony at 50 ng Chl a/colony (C/Chl a=200). In Table 2 of LaRoche and Breitbarth (2005) it is said that C/colony=0.81-0.92 μmol=9.7-11 μg, while Chl a/colony = 89.5 fmol/colony = 79 pg Chl a/colony, too low a figure to be realistic.

Carpenter et al. (2004) in their Table 5 list seven measurements for C and Chl a content per colony in April (C/Chl a mass ratio ranges from 54 to 131 with a mean of 100), and five measurements for C and Chl a content per colony in October (C/Chl a mass ratio ranges from 160 to 343 with a mean of 240). These data, too, indicate that *Trichodesmium* possesses a lower percentage of chlorophyll than algae on average (Chl a/DM ratio of 0.015) (APHA 1992). (E.g. Stal & Moezelaar (1999) for cyanobacteria employed Pr/DM = 0.55 and Pr/Chl a = 27, which gives Chl a/DM = 0.02).

### References to Table S7:

- Alberte R.S., Cheng L., Lewin R.A. (1986) Photosynthetic characteristics of *Prochloron* sp./ascidian symbioses I. Light and temperature responses of the algal symbiont of *Lissoclinum patella*. *Marine Biology* 90: 575-587.
- APHA (American Public Health Association, American Water Works Association and Water Pollution Control Federation) (1992) *Standard Methods for the Examination of Water and Wastewater*. 18th ed. Washington D.C.
- Avendaño-Coletta D., Schubert H. (2005) Oxygen evolution and respiration of the cyanobacterium *Synechocystis* sp. PCC 6803 under two different light regimes applying light/dark intervals in the time scale of minutes. *Physiologia Plantarum* 125: 381-391.
- Berman-Frank I., Cullen J.T., Shaked Y., Sherrell R.M., Falkowski P.G. (2001) Iron availability, cellular iron quotas, and nitrogen fixation in *Trichodesmium*. *Limnology and Oceanography* 46: 1249-1260.

- Berry S., Bolychevtseva Y.V., Rögner M., Karapetyan N.V. (2003) Photosynthetic and respiratory electron transport in the alkaliphilic cyanobacterium *Arthrospira (Spirulina) platensis*. *Photosynthesis Research* 78: 67-76.
- Biggins J. (1969) Respiration in blue-green algae. *Journal of Bacteriology* 99: 570-575.
- Bottomley P.J., van Baalen C. (1978) Dark hexose metabolism by photoautotrophically and heterotrophically grown cells of the blue-green alga (cyanobacterium) *Nostoc* sp. strain Mac. *Journal of Bacteriology* 135: 888-894.
- Bratbak G., Dundas I. (1984) Bacterial dry matter content and biomass estimations. *Applied and Environmental Microbiology* 48: 755-757.
- Broady P.A., Kibblewhite A.L. (1991) Morphological characterization of Oscillatoriales (Cyanobacteria) from Ross Island and southern Victoria Land, Antarctica. *Antarctic Science* 3: 35-45.
- Carpenter E.J., Roenneberg T. (1995) The marine planktonic cyanobacterium *Trichodesmium* spp.: photosynthetic rate measurements in the SW Atlantic Ocean. *Marine Ecology Progress Series* 118: 267-273.
- Carpenter E.J., Subramaniam A., Capone D.G. (2004) Biomass and primary productivity of the cyanobacterium *Trichodesmium* spp. in the tropical N Atlantic ocean. *Deep-Sea Research I* 51: 173-203.
- Chen T.-H., Huang T.-C., Chow T.-J. (1989) Calcium is required for the increase of dark respiration during diurnal nitrogen fixation by *Synechococcus* RF-1. *Plant Science* 60: 195-198.
- Ciferri O. (1983) *Spirulina*, the edible microorganism. *Microbiological Reviews* 47: 551-578.
- Cox G. (1986) Comparison of *Prochloron* from different hosts I. Structural and ultrastructural characteristics. *New Phytologist* 104: 429-445.
- Davey M.C. (1989) The effects of freezing and desiccation on photosynthesis and survival of terrestrial Antarctic algae and cyanobacteria. *Polar Biology* 10: 29-36.
- de Magalhães, Cardoso D., dos Santos C.P., Chaloub R.M. (2004) Physiological and photosynthetic responses of *Synechocystis aquatilis* f. *aquatilis* (Cyanophyceae) to elevated levels of zinc. *Journal of Phycology* 40: 496-504.
- Doolittle W.F., Singer R.A. (1974) Mutational analysis of dark endogenous metabolism in the blue-green bacterium *Anacystis nidulans*. *Journal of Bacteriology* 119: 677-683.
- Fietz S., Nicklisch A. (2002) Acclimation of the diatom *Stephanodiscus neoastraea* and the cyanobacterium *Planktothrix agardhii* to simulated natural light fluctuations. *Photosynthesis Research* 72: 95-106.
- Foy R.H., Gibson C.E. (1982) Photosynthetic characteristics of planktonic blue-green algae: changes in photosynthetic capacity and pigmentation of *Oscillatoria redekei* van Goor under high and low light. *British Phycological Journal* 17: 183-193.
- Geider R.J., Osborne B.A. (1989) Respiration and microalgal growth: a review of the quantitative relationship between dark respiration and growth. *New Phytologist* 112: 327-394.
- Gordillo F.J.F., Jiménez C., Figueroa F.L., Niell F.X. (1999) Effects of increased atmospheric CO<sub>2</sub> and N supply on photosynthesis, growth and cell composition of the cyanobacterium *Spirulina platensis (Arthrospira)*. *Journal of Applied Phycology* 10: 461-469.

- Hammouda O.H.E., El-Sheekh M.M. (1994) Response of fresh water phytoplanktonic algae *Chlorella kessleri* and *Synechocystis* PCC 6803 to anthelmintic activity of the wild Egyptian plant *Calendula micrantha* officinalis. Archives of Environmental Contamination and Toxicology 27: 406-409.
- Haury J.F., Spiller H. (1981) Fructose uptake and influence on growth of and nitrogen fixation by *Anabaena variabilis*. Journal of Bacteriology 147: 227-235.
- Ingram L.O., Calder J.A., van Baalen C., Plucker F.E., Parker P.L. (1973) Role of reduced exogenous organic compounds in the physiology of the blue-green bacteria (algae): photoheterotrophic growth of a "heterotrophic" blue-green bacterium. Journal of Bacteriology 114: 695-700.
- Koenig F., Schmidt M. (1995) *Gloeobacter violaceus* - investigation of an unusual photosynthetic apparatus. Absence of the long wavelength emission of photosystem I in 77 K fluorescence spectra. Physiologia Plantarum 94: 621-628.
- Kratz W.A., Myers J. (1955) Photosynthesis and respiration of three blue-green algae. Plant Physiology 30: 275-280.
- LaRoche J., Breitbart E. (2005) Importance of the diazotrophs as a source of new nitrogen in the ocean. Journal of Sea Research 53: 67-91.
- Li Y., Gao K. (2004) Photosynthetic physiology and growth as a function of colony size in the cyanobacterium *Nostoc sphaeroides*. European Journal of Phycology 39: 9-15.
- Otte S., Kuenen J.G., Nielsen L.P., Paerl H.W., Zopfi J., Schulz H.N., Teske A., Strotmann B., Gallardo V.A., Jørgensen B.B. (1999) Nitrogen, carbon, and sulfur metabolism in natural *Thioploca* samples. Applied and Environmental Microbiology 65: 3148-3157.
- Padan E., Raboy B., Shilo M. (1971) Endogenous dark respiration of the blue-green alga, *Plectonema boryanum*. Journal of Bacteriology 106: 45-50.
- Pereira I., Moya M., Reyes G., Kramm V. (2005) A survey of heterocystous nitrogen-fixing cyanobacteria in Chilean rice fields. Gayana Botánica 62: 26-32.
- Richardson L.L., Castenholz R.W. (1987) Enhanced survival of the cyanobacterium *Oscillatoria terebriformis* in darkness under anaerobic conditions. Applied and Environmental Microbiology 53: 2151-2158.
- Romero J.M., Lara C., Sivak M.N. (1989) Changes in net O<sub>2</sub> exchange induced by inorganic nitrogen in the blue-green alga *Anacystis nidulans*. Plant Physiology 91: 28-30.
- Rubin P.M., Zetoon E., McGowan R.E. (1977) Uptake and utilization of sugar phosphates by *Anabaena flos-aquae*. Plant Physiology 60: 407-411.
- Scherer S., Ernst A., Chen T.-W., Boger P. (1984) Rewetting of drought-resistant blue-green algae: Time course of water uptake and reappearance of respiration, photosynthesis, and nitrogen fixation. Oecologia 62: 418-423.
- Stal L.J., Moezelaar R. (1997) Fermentation in cyanobacteria. FEMS Microbiology Reviews 21: 179-211.
- Stanier R.Y., Kunisawa R., Mandel M., Cohen-Bazire G. (1971) Purification and properties of unicellular blue-green algae (order *Chroococcales*). Bacteriological Reviews 35: 171-205.
- Coleman J.R., Colman B. (1980) Effect of oxygen and temperature on the efficiency of photosynthetic carbon assimilation in two microscopic algae. Plant Physiology 65: 980-983.

- Tang E.P.Y., Vincent W.F. (2000) Effects of daylength and temperature on the growth and photosynthesis of an Arctic cyanobacterium, *Schizothrix calcicola* (Oscillatoriaceae). *European Journal of Phycology* 35: 263-272.
- Tonk L., Visser P.M., Christiansen G., Dittmann E., Snelder E.O.F.M., Wiedner C., Mur L.R., Huisman J. (2005) The microcystin composition of the cyanobacterium *Planktothrix agardhii* changes toward a more toxic variant with increasing light intensity. *Applied and Environmental Microbiology* 71: 5177-5181.
- Zubkov M.V. Fuchs B.M., Eilers H., Burkill P.H., Amann R. (1999) Determination of total protein content of bacterial cells by SYPRO staining and flow cytometry. *Applied and Environmental Microbiology* 65: 3251-3257.
