# Supplementary material
Source: PubMed Central journal article supplement (PMC2579366)
Supplement: 0802148105_DS8_PDF.pdf [file 0802148105_DS8_PDF.pdf]

## Dataset S8. Dark respiration rates in eukaryotic microalgae

Notes to Table **S8**:

Data on dark respiration rates in unicellular, non-filamentous eukaryotic microalgae are presented. Taxonomic status (the “**Phylum: Class**” column) was determined for each genus following [www.algaebase.org](http://www.algaebase.org).

Abbreviations and universal conversions: DM – dry mass; WM – wet mass; N – nitrogen mass; Chl a – Chl a mass; C – carbon mass; Pr – protein mass; X/Y – X by Y mass ratio in the cell, e.g. DM/WM is the ratio of dry to wet cell mass; X/V – the ratio of variable X to volume,  $\text{pg } \mu\text{m}^3$ , e.g. N/V is how many pg nitrogen is contained in  $1 \mu\text{m}^3$  of cell volume; X/cell is the amount of X in one cell, pg;  $1 \text{ W} = 1 \text{ J s}^{-1}$ ;  $1 \text{ mol O}_2 = 32 \text{ g O}_2$ ;  $1 \text{ mol C} = 12 \text{ g C}$ .

Column “**U**” (mass units of respiration rate measurements): D – dry mass or Chl a mass with known Chl a/DM ratio; W – wet mass without information on DM/WM ratio; Chl – chlorophyll mass without information on Chl a/DM ratio; Pr – protein mass; C – carbon mass.

“**Original units**” are the units of dark respiration rate measurements as given in the original publication (“**Source**”); **qou** is the numeric value of dark respiration rate in the original units. E.g., if it is “ $\text{mg O}_2 (\text{g DM})^{-1} \text{ hr}^{-1}$ ” in the column “**Original units**” and “1.1” in the column “**qou**”, this means that dark respiration rate of the corresponding species, as given in the original publication indicated in the column “**Source**”, is  $1.1 \text{ mg O}_2 (\text{g DM})^{-1} \text{ hr}^{-1}$ .

**qWkg** is dark respiration rate converted to W ( $\text{kg WM}^{-1}$ ) (Watts per kg wet mass) using the following conversion factors: C/DM = 0.5 (Kratz & Myers 1955; Bratbak & Dundas 1984; Stal & Moezelaar 1997), Chl a/DM = 0.015 (APHA 1992), Pr/DM = 0.5 (Otte et al. 1999; Zubkov et al. 1999; Stal & Moezelaar 1997) and DM/WM = 0.3 as a crude mean for all taxa applied in the analysis (SI Methods, Table S12a). If the Chl a/DM ratio is known (shown in the “**Comments**” column), while **qou** is per unit Chl a mass, the dark respiration rate is first calculated per unit dry mass and then converted to **qWkg** using the reference DM/WM = 0.3. Energy conversion:  $1 \text{ ml O}_2 = 20 \text{ J}$ . Where **qou** is calculated on cell basis, and carbon content of the cell is known, **qWkg** is first expressed per unit carbon mass and then per unit wet mass using the conversion factors above, rather than obtained by dividing by the known cell mass.

**TC** is ambient temperature during measurements, degrees Celsius.

**q25Wkg** is dark respiration rate converted to  $25 \text{ }^\circ\text{C}$  using  $Q_{10} = 2$ ,  $\text{q25Wkg} = \text{qWkg} \times 2^{(25 - \text{TC})/10}$ , dimension W ( $\text{kg WM}^{-1}$ ). For each species rows are arranged in the order of increasing **q25Wkg**.

**MIN** – indicates the minimum **q25Wkg** value for each species, that was used in the analyses in the paper.

**Mpg**: estimated cell mass, pg ( 1 pg = 10<sup>-12</sup> g). Square brackets around **Mpg** value indicate that this value was obtained from a different source than the source of dark respiration rate data. When converting cell volume to cell mass, cell density of 1 g ml<sup>-1</sup> was assumed.

**Source**: the first, unbracketed reference in this column is where the value of **qou** is taken from; references and data in square brackets refer to cell size determination.

**Growth rate, day<sup>-1</sup>**: this column contains available growth rates as well as other information on culture conditions, including illumination (it is given in braces, where available, e.g. 150 μmol m<sup>-2</sup> s<sup>-1</sup>); Log – logarithmic, exp – exponential, stat – stationary phase of cell cycle.

**Comments**: information on cell composition

**qN**: dark respiration rate per unit nitrogen mass, **100 W (kg N)<sup>-1</sup>**. I.e., **qN** = 5 means that dark respiration rate is 500 W (kg N)<sup>-1</sup>. Where available, values of **qN** corresponding to minimal **q25Wkg** values (those in MIN rows), were converted to 25 °C in the same manner as **qWkg** (using Q<sub>10</sub> = 2) Analysis of these **directly available** nitrogen-based dark respiration rates (17 temperature-transformed values for 17 species) yielded a geometric mean value of q<sub>N</sub> = 4×10<sup>2</sup> W (kg N)<sup>-1</sup>, in good agreement with the value of 3.7×10<sup>2</sup> W (kg N)<sup>-1</sup> in Table 1 of the paper, that was obtained by transforming mean data set **q25Wkg** value (8.8 W (kg WM)<sup>-1</sup>, n = 47) with use of mean conversion coefficients as q<sub>N</sub> = **q25Wkg**/0.3/0.08, where 0.3 = DM/WM and 0.08 = N/DM. The value of N/DM = 0.08 was calculated for the studied species with the known N/C ratio assuming C/DM = 0.5 (SI Methods, Table S12b).

Log<sub>10</sub>-transformed values of **q25Wkg** (W (kg WM)<sup>-1</sup>), minimum for each species, were used in the analyses shown in Figures 1-2 and Table 1 in the paper (a total of 47 values for n = 47 species). These values are in rows marked **MIN** and highlighted in blue.

| Species                        | U | MIN | Original units                                                           | qou  | qWkg  | TC | q25Wkg | Mpg | Phylum: Class                         | Source       | Growth rate, day <sup>-1</sup> | Comments | qN |
|--------------------------------|---|-----|--------------------------------------------------------------------------|------|-------|----|--------|-----|---------------------------------------|--------------|--------------------------------|----------|----|
| 1. <i>Asterionella formosa</i> | W | MIN | mg O <sub>2</sub> (10 <sup>9</sup> cells) <sup>-1</sup> hr <sup>-1</sup> | 0.17 | 1.613 | 10 | 4.562  | 410 | Bacillariophyta:<br>Fragilariophyceae | Talling 1957 |                                |          |    |
| 2. <i>Asterionella formosa</i> | W |     | mg O <sub>2</sub> (10 <sup>9</sup> cells) <sup>-1</sup> hr <sup>-1</sup> | 0.23 | 2.182 | 14 | 4.677  | 410 | Bacillariophyta:<br>Fragilariophyceae | Talling 1957 |                                |          |    |
| 3. <i>Asterionella formosa</i> | W |     | mg O <sub>2</sub> (10 <sup>9</sup> cells) <sup>-1</sup> hr <sup>-1</sup> | 0.21 | 1.992 | 11 | 5.257  | 410 | Bacillariophyta:<br>Fragilariophyceae | Talling 1957 |                                |          |    |
| 4. <i>Asterionella formosa</i> | W |     | mg O <sub>2</sub> (10 <sup>9</sup> cells) <sup>-1</sup> hr <sup>-1</sup> | 0.24 | 2.276 | 11 | 6.006  | 410 | Bacillariophyta:<br>Fragilariophyceae | Talling 1957 |                                |          |    |
| 5. <i>Asterionella formosa</i> | W |     | mg O <sub>2</sub> (10 <sup>9</sup> cells) <sup>-1</sup> hr <sup>-1</sup> | 0.35 | 3.320 | 16 | 6.195  | 410 | Bacillariophyta:<br>Fragilariophyceae | Talling 1957 |                                |          |    |

|     |                                  |     |     |                                                                          |         |       |     |        |        |                                         |                                                                                                |                         |                                                     |     |
|-----|----------------------------------|-----|-----|--------------------------------------------------------------------------|---------|-------|-----|--------|--------|-----------------------------------------|------------------------------------------------------------------------------------------------|-------------------------|-----------------------------------------------------|-----|
| 6.  | <i>Asterionella formosa</i>      | W   |     | mg O <sub>2</sub> (10 <sup>9</sup> cells) <sup>-1</sup> hr <sup>-1</sup> | 0.21    | 2.094 | 7   | 7.292  | 390    | Bacillariophyta:<br>Fragilariophyceae   | Talling 1957                                                                                   |                         |                                                     |     |
| 7.  | <i>Asterionella formosa</i>      | W   |     | mg O <sub>2</sub> (10 <sup>9</sup> cells) <sup>-1</sup> hr <sup>-1</sup> | 0.21    | 1.992 | 6   | 7.434  | 410    | Bacillariophyta:<br>Fragilariophyceae   | Talling 1957                                                                                   |                         |                                                     |     |
| 8.  | <i>Asterionella formosa</i>      | W   |     | mg O <sub>2</sub> (10 <sup>9</sup> cells) <sup>-1</sup> hr <sup>-1</sup> | 0.20    | 1.897 | 5   | 7.588  | 410    | Bacillariophyta:<br>Fragilariophyceae   | Talling 1957                                                                                   |                         |                                                     |     |
| 9.  | <i>Asterionella formosa</i>      | W   |     | mg O <sub>2</sub> (10 <sup>9</sup> cells) <sup>-1</sup> hr <sup>-1</sup> | 0.41    | 3.889 | 10  | 11.000 | 410    | Bacillariophyta:<br>Fragilariophyceae   | Talling 1957                                                                                   |                         |                                                     |     |
| 10. | <i>Asterionella formosa</i>      | W   |     | mg O <sub>2</sub> (10 <sup>9</sup> cells) <sup>-1</sup> hr <sup>-1</sup> | 0.85    | 8.063 | 16  | 15.046 | 410    | Bacillariophyta:<br>Fragilariophyceae   | Talling 1957                                                                                   |                         |                                                     |     |
| 11. | <i>Asterionella formosa</i>      | W   |     | mg O <sub>2</sub> (10 <sup>9</sup> cells) <sup>-1</sup> hr <sup>-1</sup> | 0.45    | 4.268 | 5   | 17.072 | 410    | Bacillariophyta:<br>Fragilariophyceae   | Talling 1957                                                                                   |                         |                                                     |     |
| 12. | <i>Chaetoceros furcellatus</i>   | C   | MIN | g C (g cell C) <sup>-1</sup> hr <sup>-1</sup>                            | 0.00048 | 0.75  | 0.5 | 4.098  | [150]  | Bacillariophyta:<br>Coscinodiscophyceae | Sakshaug et al. 1991 [calculated assuming C/V=0.15 pg/μm <sup>3</sup> ]                        | 0.09                    | N/cell=3.8 pg<br>C/cell=22 pg<br>Chl a/cell=0.79 pg | 0.2 |
| 13. | <i>Chaetoceros furcellatus</i>   | C   |     | g C (g cell C) <sup>-1</sup> hr <sup>-1</sup>                            | 0.0017  | 2.6   | 0.5 | 14.207 | [300]  | Bacillariophyta:<br>Coscinodiscophyceae | Sakshaug et al. 1991 [calculated assuming C/V=0.15 pg/μm <sup>3</sup> ]                        | 0.12                    | N/cell=8.9 pg<br>C/cell=47 pg<br>Chl a/cell=0.94 pg | 0.9 |
| 14. | <i>Chaetoceros furcellatus</i>   | C   |     | g C (g cell C) <sup>-1</sup> hr <sup>-1</sup>                            | 0.0028  | 4.4   | 0.5 | 24.042 | [130]  | Bacillariophyta:<br>Coscinodiscophyceae | Sakshaug et al. 1991 [calculated assuming C/V=0.15 pg/μm <sup>3</sup> ]                        | 0.32                    | N/cell=2.9 pg<br>C/cell=19 pg<br>Chl a/cell=0.39 pg | 1.9 |
| 15. | <i>Chaetoceros furcellatus</i>   | C   |     | g C (g cell C) <sup>-1</sup> hr <sup>-1</sup>                            | 0.0036  | 5.6   | 0.5 | 30.599 | [200]  | Bacillariophyta:<br>Coscinodiscophyceae | Sakshaug et al. 1991 [calculated assuming C/V=0.15 pg/μm <sup>3</sup> ]                        | 0.30                    | N/cell=4.9 pg<br>C/cell=32 pg<br>Chl a/cell=0.23 pg | 2.4 |
| 16. | <i>Chlamydomonas reinhardtii</i> | Chl | MIN | mmol O <sub>2</sub> (mol Chl) <sup>-1</sup> s <sup>-1</sup>              | 4       | 9     | 22  | 11.080 | [2000] | Chlorophyta:<br>Chlorophyceae           | Polle et al. 2001 [http://protist.i.hosei.ac.jp]                                               |                         | 1 mol Chl=893.5 g<br>Chl/cell=3.9 pg                |     |
| 17. | <i>Chlamydomonas reinhardtii</i> | Chl |     | mmol O <sub>2</sub> (mol Chl) <sup>-1</sup> s <sup>-1</sup>              | 26.7    | 15    | 25  | 15.000 | [2000] | Chlorophyta:<br>Chlorophyceae           | Coleman & Colman 1980 [http://protist.i.hosei.ac.jp]                                           |                         |                                                     |     |
| 18. | <i>Chlamydomonas reinhardtii</i> | Chl |     | mmol O <sub>2</sub> (mol Chl) <sup>-1</sup> s <sup>-1</sup>              | 54.9    | 31    | 35  | 15.500 | [2000] | Chlorophyta:<br>Chlorophyceae           | Coleman & Colman 1980 [http://protist.i.hosei.ac.jp]                                           |                         |                                                     |     |
| 19. | <i>Chlamydomonas reinhardtii</i> | Chl |     | mmol O <sub>2</sub> (mol Chl) <sup>-1</sup> s <sup>-1</sup>              | 17.3    | 9.7   | 15  | 19.400 | [2000] | Chlorophyta:<br>Chlorophyceae           | Coleman & Colman 1980 [http://protist.i.hosei.ac.jp]                                           |                         |                                                     |     |
| 20. | <i>Chlorella kessleri</i>        | Chl | MIN | μmol O <sub>2</sub> (mg Chl) <sup>-1</sup> hr <sup>-1</sup>              | 25      | 14    | 27  | 12.188 | [90]   | Chlorophyta:<br>Trebouxiophyceae        | Hammouda & El-Sheekh 1994 [Lee & Lee 2001, Fig. 1b; Krienitz et al. 2004, Fig. 8, diam 5-6 μm] |                         |                                                     |     |
| 21. | <i>Chlorella pyrenoidosa</i>     | Chl | MIN | μmol O <sub>2</sub> (mg Chl a) <sup>-1</sup> hr <sup>-1</sup>            | 9.9/9.0 | 0.6   | 24  | 0.643  |        | Chlorophyta:<br>Trebouxiophyceae        | Burris 1977                                                                                    | late exp/<br>early stat |                                                     |     |

|                                   |     |     |                                                                                           |        |      |    |        |         |                                         |                                                                |                                              |                                                                 |     |
|-----------------------------------|-----|-----|-------------------------------------------------------------------------------------------|--------|------|----|--------|---------|-----------------------------------------|----------------------------------------------------------------|----------------------------------------------|-----------------------------------------------------------------|-----|
| 22. <i>Chlorella pyrenoidosa</i>  | W   |     | $\mu\text{l O}_2 (0.2 \text{ g WM})^{-1} (30 \text{ min})^{-1}$                           | 20     | 1    | 25 | 1.000  |         | Chlorophyta:<br>Trebouxiophyceae        | Gest & Kamen 1948                                              |                                              |                                                                 |     |
| 23. <i>Chlorella pyrenoidosa</i>  | D   |     | $\mu\text{l O}_2 (\text{mg DM})^{-1} \text{ hr}^{-1}$                                     | 4.6    | 7.7  | 25 | 7.700  | 30      | Chlorophyta:<br>Trebouxiophyceae        | Myers & Graham 1971                                            | 0.35                                         | DM/V=0.179 $\text{pg}/\mu\text{m}^3$<br>Chl/DM=5.19%            |     |
| 24. <i>Chlorella pyrenoidosa</i>  | D   |     | $\mu\text{mol O}_2 (\text{g DM})^{-1} \text{ min}^{-1}$                                   | 4.14   | 9.3  | 25 | 9.300  |         | Chlorophyta:<br>Trebouxiophyceae        | Pickett 1975                                                   | 0.282                                        |                                                                 |     |
| 25. <i>Chlorella pyrenoidosa</i>  | D   |     | $\mu\text{l O}_2 (\text{mg DM})^{-1} \text{ hr}^{-1}$                                     | 5.9    | 9.8  | 25 | 9.800  | 32      | Chlorophyta:<br>Trebouxiophyceae        | Myers & Graham 1971                                            | 0.78                                         | DM/V=0.197 $\text{pg}/\mu\text{m}^3$<br>Chl/DM=4.52%            |     |
| 26. <i>Chlorella pyrenoidosa</i>  | D   |     | $\mu\text{mol O}_2 (\text{g DM})^{-1} \text{ min}^{-1}$                                   | 5.00   | 11.2 | 25 | 11.200 |         | Chlorophyta:<br>Trebouxiophyceae        | Pickett 1975                                                   | 0.361                                        |                                                                 |     |
| 27. <i>Chlorella pyrenoidosa</i>  | D   |     | $\mu\text{mol O}_2 (\text{g DM})^{-1} \text{ min}^{-1}$                                   | 5.16   | 11.6 | 25 | 11.600 |         | Chlorophyta:<br>Trebouxiophyceae        | Pickett 1975                                                   | 0.439                                        |                                                                 |     |
| 28. <i>Chlorella pyrenoidosa</i>  | D   |     | $\mu\text{l O}_2 (\text{mg DM})^{-1} \text{ hr}^{-1}$                                     | 8.7    | 15   | 25 | 15.000 | 34      | Chlorophyta:<br>Trebouxiophyceae        | Myers & Graham 1971                                            | 1.3                                          | DM/V=0.215 $\text{pg}/\mu\text{m}^3$<br>Chl/DM=3.92%            |     |
| 29. <i>Chlorella pyrenoidosa</i>  | D   |     | $\mu\text{mol O}_2 (\text{g DM})^{-1} \text{ min}^{-1}$                                   | 7.43   | 16.6 | 25 | 16.600 |         | Chlorophyta:<br>Trebouxiophyceae        | Pickett 1975                                                   | 0.613                                        |                                                                 |     |
| 30. <i>Chlorella pyrenoidosa</i>  | D   |     | $\mu\text{l O}_2 (\text{mg DM})^{-1} \text{ hr}^{-1}$                                     | 11.2   | 19   | 25 | 19.000 | 49      | Chlorophyta:<br>Trebouxiophyceae        | Myers & Graham 1971                                            | 1.8                                          | DM/V=0.252 $\text{pg}/\mu\text{m}^3$<br>Chl/DM=3.10%            |     |
| 31. <i>Chlorella pyrenoidosa</i>  | D   |     | $\mu\text{l O}_2 (\text{mg DM})^{-1} \text{ hr}^{-1}$                                     | 11.9   | 20   | 25 | 20.000 | 92      | Chlorophyta:<br>Trebouxiophyceae        | Myers & Graham 1971                                            | 2.3                                          | DM/V=0.256 $\text{pg}/\mu\text{m}^3$<br>Chl/DM=1.53%            |     |
| 32. <i>Chlorella pyrenoidosa</i>  | D   |     | $\mu\text{l O}_2 (\text{mg DM})^{-1} \text{ hr}^{-1}$                                     | 13.8   | 23   | 25 | 23.000 | 75      | Chlorophyta:<br>Trebouxiophyceae        | Myers & Graham 1971                                            | 2.4                                          | DM/V=0.242 $\text{pg}/\mu\text{m}^3$<br>Chl/DM=1.14%            |     |
| 33. <i>Coscinodiscus</i> sp. C38B | C   | MIN | $\text{g C (g cell C)}^{-1} \text{ hr}^{-1}$                                              | 0.0038 | 5.9  | 18 | 9.585  | 275000  | Bacillariophyta:<br>Coscinodiscophyceae | Blasco et al. 1982                                             | 0.62; Log                                    | C/V=0.044 $\text{pg}/\mu\text{m}^3$<br>C/N=7.9<br>Chl a/C=0.93% | 3.1 |
| 34. <i>Coscinodiscus</i> sp. CoA  | C   | MIN | $\text{g C (g cell C)}^{-1} \text{ hr}^{-1}$                                              | 0.0035 | 5.4  | 18 | 8.772  | 6200000 | Bacillariophyta:<br>Coscinodiscophyceae | Blasco et al. 1982                                             | 0.55; Log                                    | C/V=0.026 $\text{pg}/\mu\text{m}^3$<br>C/N=6.7<br>Chl a/C=1.33% | 2.4 |
| 35. <i>Ditylum brightwellii</i>   | C   | MIN | $\text{g C (g cell C)}^{-1} \text{ hr}^{-1}$                                              | 0.0019 | 3.0  | 18 | 4.874  | 118000  | Bacillariophyta:<br>Coscinodiscophyceae | Blasco et al. 1982                                             | 1.0; one division away from stationary phase | C/V=0.023 $\text{pg}/\mu\text{m}^3$<br>C/N=5.9<br>Chl a/C=1.41% | 1.2 |
| 36. <i>Dunaliella salina</i>      | W   | MIN | $\text{ml O}_2 (10^8 \text{ cells})^{-1} \text{ hr}^{-1}$                                 | 1.08   | 4    | 20 | 5.657  | 1570    | Chlorophyta:<br>Chlorophyceae           | Vladimirova & Zotin 1983, 1985 (data of Mironyuk & Einor 1968) |                                              |                                                                 |     |
| 37. <i>Dunaliella salina</i>      | Chl |     | $\mu\text{mol O}_2 (\text{mg Chl})^{-1} \text{ hr}^{-1}$                                  | 33.5   | 18   | 24 | 19.292 |         | Chlorophyta:<br>Chlorophyceae           | Liska 2004                                                     |                                              |                                                                 |     |
| 38. <i>Dunaliella tertiolecta</i> | C   | MIN | $10^{-5} \text{ mol O}_2 (\text{mol C})^{-1} \text{ s}^{-1}$                              | 0.17   | 9.5  | 18 | 15.433 | [120]   | Chlorophyta:<br>Chlorophyceae           | Quigg & Beardall 2003 [Sciandra et al. 1997, Fig. 1]           | 0.2                                          | Chl a/C=6.9%<br>Pr/cell=15.8 pg<br>C/N=4.4                      | 2.8 |
| 39. <i>Dunaliella tertiolecta</i> | C   |     | $\mu\text{mol O}_2 \text{ cell}^{-1} \text{ min}^{-1} \times 10^{10}$ at 40 pg C per cell | 3.1    | 8.7  | 15 | 17.400 | 69      | Chlorophyta:<br>Chlorophyceae           | Falkowski & Owens 1980                                         | 0; Log                                       | C/V=0.580 $\text{pg}/\mu\text{m}^3$<br>C/N=3.1                  | 1.8 |
| 40. <i>Dunaliella tertiolecta</i> | C   |     | $\mu\text{mol O}_2 \text{ cell}^{-1} \text{ min}^{-1} \times 10^{10}$ at 41 pg C per cell | 4.0    | 11   | 15 | 22.000 | 73      | Chlorophyta:<br>Chlorophyceae           | Falkowski & Owens 1980                                         | 0; Log                                       | C/V=0.562 $\text{pg}/\mu\text{m}^3$<br>C/N=3.0                  | 2.2 |

|                                   |     |     |                                                                                           |      |     |      |         |       |                                 |                                                      |                                |                                                 |     |
|-----------------------------------|-----|-----|-------------------------------------------------------------------------------------------|------|-----|------|---------|-------|---------------------------------|------------------------------------------------------|--------------------------------|-------------------------------------------------|-----|
| 41. <i>Dunaliella tertiolecta</i> | C   |     | $\mu\text{mol O}_2 \text{ cell}^{-1} \text{ min}^{-1} \times 10^{10}$ at 37 pg C per cell | 5.2  | 16  | 15   | 32.000  | 84    | Chlorophyta:<br>Chlorophyceae   | Falkowski & Owens 1980                               | 0.09; Log                      | C/V=0.440 pg/ $\mu\text{m}^3$<br>C/N=3.2        | 3.4 |
| 42. <i>Dunaliella tertiolecta</i> | C   |     | $10^{-5} \text{ mol O}_2 (\text{mol C})^{-1} \text{ s}^{-1}$                              | 0.48 | 27  | 18   | 43.862  | [120] | Chlorophyta:<br>Chlorophyceae   | Quigg & Beardall 2003 [Sciandra et al. 1997, Fig. 1] | 0.7                            | Chl a/C=8.4%<br>Pr/cell=8.24 pg<br>C/N=7.6      | 14  |
| 43. <i>Dunaliella tertiolecta</i> | C   |     | $\mu\text{mol O}_2 \text{ cell}^{-1} \text{ min}^{-1} \times 10^{10}$ at 31 pg C per cell | 7.2  | 26  | 15   | 52.000  | 90    | Chlorophyta:<br>Chlorophyceae   | Falkowski & Owens 1980                               | 0.42; Log                      | C/V=0.341 pg/ $\mu\text{m}^3$<br>C/N=3.4        | 5.9 |
| 44. <i>Dunaliella tertiolecta</i> | C   |     | $10^{-5} \text{ mol O}_2 (\text{mol C})^{-1} \text{ s}^{-1}$                              | 0.61 | 34  | 18   | 55.233  | [120] | Chlorophyta:<br>Chlorophyceae   | Quigg & Beardall 2003 [Sciandra et al. 1997, Fig. 1] | 0.3                            | Chl a/C=6.6%<br>Pr/cell=8.75 pg<br>C/N=5.6      | 13  |
| 45. <i>Dunaliella tertiolecta</i> | C   |     | $\mu\text{mol O}_2 \text{ cell}^{-1} \text{ min}^{-1} \times 10^{10}$ at 28 pg C per cell | 7.3  | 29  | 15   | 58.000  | 104   | Chlorophyta:<br>Chlorophyceae   | Falkowski & Owens 1980                               | 0.66; Log                      | C/V=0.269 pg/ $\mu\text{m}^3$<br>C/N=3.8        | 7.4 |
| 46. <i>Dunaliella tertiolecta</i> | C   |     | $\mu\text{mol O}_2 \text{ cell}^{-1} \text{ min}^{-1} \times 10^{10}$ at 30 pg C per cell | 8.4  | 31  | 15   | 62.000  | 112   | Chlorophyta:<br>Chlorophyceae   | Falkowski & Owens 1980                               | 0.87; Log                      | C/V=0.269 pg/ $\mu\text{m}^3$<br>C/N=4.1        | 8.6 |
| 47. <i>Dunaliella tertiolecta</i> | C   |     | $10^{-5} \text{ mol O}_2 (\text{mol C})^{-1} \text{ s}^{-1}$                              | 0.72 | 40  | 18   | 64.980  | [120] | Chlorophyta:<br>Chlorophyceae   | Quigg & Beardall 2003 [Sciandra et al. 1997, Fig. 1] | 1.1                            | Chl a/C=7.2%<br>Pr/cell=8.12 pg<br>C/N=2.6      | 6.9 |
| 48. <i>Dunaliella tertiolecta</i> | C   |     | $\mu\text{mol O}_2 \text{ cell}^{-1} \text{ min}^{-1} \times 10^{10}$ at 29 pg C per cell | 8.9  | 34  | 15   | 68.000  | 115   | Chlorophyta:<br>Chlorophyceae   | Falkowski & Owens 1980                               | 1.25; Log                      | C/V=0.252 pg/ $\mu\text{m}^3$<br>C/N=5.3        | 12  |
| 49. <i>Dunaliella tertiolecta</i> | C   |     | $10^{-5} \text{ mol O}_2 (\text{mol C})^{-1} \text{ s}^{-1}$                              | 1.6  | 90  | 18   | 146.205 | [120] | Chlorophyta:<br>Chlorophyceae   | Quigg & Beardall 2003 [Sciandra et al. 1997, Fig. 1] | 1.0                            | Chl a/C=10.3%<br>C/N=4.2                        | 25  |
| 50. <i>Dunaliella tertiolecta</i> | C   |     | $10^{-5} \text{ mol O}_2 (\text{mol C})^{-1} \text{ s}^{-1}$                              | 1.6  | 90  | 18   | 146.205 | [120] | Chlorophyta:<br>Chlorophyceae   | Quigg & Beardall 2003 [Sciandra et al. 1997, Fig. 1] | 1.2                            | Chl a/C=4.1%<br>C/N=3.7                         | 22  |
| 51. <i>Dunaliella tertiolecta</i> | C   |     | $10^{-5} \text{ mol O}_2 (\text{mol C})^{-1} \text{ s}^{-1}$                              | 1.7  | 95  | 18   | 154.328 | [120] | Chlorophyta:<br>Chlorophyceae   | Quigg & Beardall 2003 [Sciandra et al. 1997, Fig. 1] | 1.4                            | Chl a/C=3.3%<br>C/N=4.3                         | 27  |
| 52. <i>Emiliana huxleyi</i>       | C   | MIN | $\mu\text{mol O}_2 (\text{mg Chl a})^{-1} \text{ hr}^{-1}$ at Chl a/Corg = 0.031          | 14   | 8   | 15   | 16.000  | [64]  | Haptophyta:<br>Prymnesiophyceae | Nielsen 1997 [Verity et al. 1992]                    | 0.27                           | Chl a/Corg=3.1%<br>Corg/Ctot=0.62<br>Corg/N=4.8 | 2.6 |
| 53. <i>Emiliana huxleyi</i>       | C   |     | $\mu\text{mol O}_2 (\text{mg Chl a})^{-1} \text{ hr}^{-1}$ at Chl a/Corg = 0.028          | 16   | 8.4 | 15   | 16.800  | [64]  | Haptophyta:<br>Prymnesiophyceae | Nielsen 1997 [Verity et al. 1992]                    | 0.30                           | Chl a/Corg=2.8%<br>Corg/Ctot=0.62<br>Corg/N=6.0 | 3.3 |
| 54. <i>Emiliana huxleyi</i>       | Chl |     | $\text{mg O}_2 (\text{mg Chl})^{-1} \text{ hr}^{-1}$                                      | 0.60 | 10  | 17.5 | 16.818  | [64]  | Haptophyta:<br>Prymnesiophyceae | Flameling & Kromkamp 1998 [Verity et al. 1992]       | cells dark-adapted for 15 mins |                                                 |     |
| 55. <i>Emiliana huxleyi</i>       | C   |     | $\mu\text{mol O}_2 (\text{mg Chl a})^{-1} \text{ hr}^{-1}$ at Chl a/Corg = 0.009          | 65   | 11  | 15   | 22.000  | [64]  | Haptophyta:<br>Prymnesiophyceae | Nielsen 1997 [Verity et al. 1992]                    | 0.87                           | Chl a/Corg=0.9%<br>Corg/Ctot=0.62<br>Corg/N=5.1 | 3.7 |
| 56. <i>Emiliana huxleyi</i>       | C   |     | $\mu\text{mol O}_2 (\text{mg Chl a})^{-1} \text{ hr}^{-1}$ at Chl a/Corg = 0.029          | 22   | 12  | 15   | 24.000  | [64]  | Haptophyta:<br>Prymnesiophyceae | Nielsen 1997 [Verity et al. 1992]                    | 0.64                           | Chl a/Corg=2.9%<br>Corg/Ctot=0.62<br>Corg/N=5.6 | 4.4 |

|                                   |     |     |                                                                                  |          |      |      |        |       |                                    |                                                    |       |                                                                             |                                       |
|-----------------------------------|-----|-----|----------------------------------------------------------------------------------|----------|------|------|--------|-------|------------------------------------|----------------------------------------------------|-------|-----------------------------------------------------------------------------|---------------------------------------|
| 57. <i>Emiliana huxleyi</i>       | C   |     | $\mu\text{mol O}_2 (\text{mg Chl a})^{-1} \text{ hr}^{-1}$ at Chl a/Corg = 0.024 | 28       | 12   | 15   | 24.000 | [64]  | Haptophyta: Prymnesiophyceae       | Nielsen 1997 [Verity et al. 1992]                  | 0.68  | Chl a/Corg=2.4%<br>Corg/Ctot=0.62<br>Corg/N=5.7                             | 4.8                                   |
| 58. <i>Emiliana huxleyi</i>       | C   |     | $\mu\text{mol O}_2 (\text{mg Chl a})^{-1} \text{ hr}^{-1}$ at Chl a/Corg = 0.020 | 32       | 12   | 15   | 24.000 | [64]  | Haptophyta: Prymnesiophyceae       | Nielsen 1997 [Verity et al. 1992]                  | 0.66  | Chl a/Corg=2.0%<br>Corg/Ctot=0.62<br>Corg/N=6.3                             | 5.0                                   |
| 59. <i>Emiliana huxleyi</i>       | C   |     | $\mu\text{mol O}_2 (\text{mg Chl a})^{-1} \text{ hr}^{-1}$ at Chl a/Corg = 0.015 | 48       | 14   | 15   | 28.000 | [64]  | Haptophyta: Prymnesiophyceae       | Nielsen 1997 [Verity et al. 1992]                  | 0.85  | Chl a/Corg=1.5%<br>Corg/Ctot=0.62<br>Corg/N=4.9                             | 4.4                                   |
| 60. <i>Emiliana huxleyi</i>       | C   |     | $\mu\text{mol O}_2 (\text{mg Chl a})^{-1} \text{ hr}^{-1}$ at Chl a/Corg = 0.019 | 42       | 15   | 15   | 30.000 | [64]  | Haptophyta: Prymnesiophyceae       | Nielsen 1997 [Verity et al. 1992]                  | 0.80  | Chl a/Corg=1.9%<br>Corg/Ctot=0.62<br>Corg/N=6.8                             | 6.8                                   |
| 61. <i>Emiliana huxleyi</i>       | C   |     | $\mu\text{mol O}_2 (\text{mg Chl a})^{-1} \text{ hr}^{-1}$ at Chl a/Corg = 0.019 | 43       | 15   | 15   | 30.000 | [64]  | Haptophyta: Prymnesiophyceae       | Nielsen 1997 [Verity et al. 1992]                  | 0.72  | Chl a/Corg=1.9%<br>Corg/Ctot=0.62<br>Corg/N=5.3                             | 5.4                                   |
| 62. <i>Emiliana huxleyi</i>       | C   |     | $\mu\text{mol O}_2 (\text{mg Chl a})^{-1} \text{ hr}^{-1}$ at Chl a/Corg = 0.018 | 46       | 16   | 15   | 32.000 | [64]  | Haptophyta: Prymnesiophyceae       | Nielsen 1997 [Verity et al. 1992]                  | 0.75  | Chl a/Corg=1.8%<br>Corg/Ctot=0.62<br>Corg/N=6.0                             | 6.2                                   |
| 63. <i>Emiliana huxleyi</i>       | C   |     | $\mu\text{mol O}_2 (\text{mg Chl a})^{-1} \text{ hr}^{-1}$ at Chl a/Corg = 0.022 | 40       | 17   | 15   | 34.000 | [64]  | Haptophyta: Prymnesiophyceae       | Nielsen 1997 [Verity et al. 1992]                  | 0.73  | Chl a/Corg=2.2%<br>Corg/Ctot=0.62<br>Corg/N=6.3                             | 6.9                                   |
| 64. <i>Emiliana huxleyi</i>       | Chl |     | $\text{mg O}_2 (\text{mg Chl})^{-1} \text{ hr}^{-1}$                             | 1.75     | 30   | 17.5 | 50.454 | [64]  | Haptophyta: Prymnesiophyceae       | Flameling & Kromkamp 1998 [Verity et al. 1992]     |       | cells dark-adapted for 15 mins                                              |                                       |
| 65. <i>Emiliana huxleyi</i>       | Chl |     | $\text{mg O}_2 (\text{mg Chl})^{-1} \text{ hr}^{-1}$                             | 1.92     | 33   | 17.5 | 55.499 | [64]  | Haptophyta: Prymnesiophyceae       | Flameling & Kromkamp 1998 [Verity et al. 1992]     |       | cells dark-adapted for 15 mins                                              |                                       |
| 66. <i>Euglena gracilis</i>       | W   | MIN | $\text{ml O}_2 (10^8 \text{ cells})^{-1} \text{ hr}^{-1}$                        | 12.8     | 7    | 20   | 9.899  | 10300 | Euglenozoa: Euglenophyceae         | Vladimirova & Zotin 1983, 1985 (data of Cook 1966) |       |                                                                             |                                       |
| 67. <i>Euglena gracilis</i>       | W   |     | $\text{ml O}_2 (10^8 \text{ cells})^{-1} \text{ hr}^{-1}$                        | 16.0     | 9    | 20   | 12.728 | 9700  | Euglenozoa: Euglenophyceae         | Vladimirova & Zotin 1983, 1985 (data of Cook 1966) |       |                                                                             |                                       |
| 68. <i>Fragilaria crotonensis</i> | W   | MIN | $\text{mg O}_2 (10^9 \text{ cells})^{-1} \text{ hr}^{-1}$                        | 1.78     | 23   | 16   | 42.920 | 300   | Bacillariophyta: Fragilariophyceae | Talling 1957                                       |       |                                                                             |                                       |
| 69. <i>Glenodinium</i> sp.        | Chl | MIN | $\mu\text{mol O}_2 (\text{mg Chl a})^{-1} \text{ hr}^{-1}$                       | 61.7/1.3 | 26   | 24   | 27.866 |       | Myzozoa: Dinophyceae               | Burris 1977                                        |       | late exp/<br>early stat                                                     |                                       |
| 70. <i>Gonyaulax polyedra</i>     | Pr  | MIN | $\mu\text{mol O}_2 (\text{mg Chl})^{-1} \text{ hr}^{-1}$ at Chl a/Pr = 0.0048    | 64.1     | 5.7  | 20   | 8.061  | 21000 | Myzozoa: Dinophyceae               | Sweeney 1986                                       |       | late log                                                                    | Pr/cell=7100 pg<br>Chl a/cell=33.9 pg |
| 71. <i>Gonyaulax tamarensis</i>   | C   | MIN | $10^{-3} \mu\text{mol O}_2 (\mu\text{g C})^{-1} \text{ hr}^{-1}$                 | 0.64     | 12.0 | 15   | 24.000 | 15150 | Myzozoa: Dinophyceae               | Langdon 1987                                       | 0.520 | C/V=0.277 pg/ $\mu\text{m}^3$<br>C/N=8.4<br>C/Chl a=87.0<br>C/cell=4190 pg  | 6.7                                   |
| 72. <i>Gonyaulax tamarensis</i>   | C   |     | $10^{-3} \mu\text{mol O}_2 (\mu\text{g C})^{-1} \text{ hr}^{-1}$                 | 0.82     | 15.3 | 15   | 30.600 | 14137 | Myzozoa: Dinophyceae               | Langdon 1987                                       | 0.310 | C/V=0.218 pg/ $\mu\text{m}^3$<br>C/N=7.5<br>C/Chl a=106.0<br>C/cell=3078 pg | 7.7                                   |

| Strain                          | Condition | Measurement                                                      | Rate                                                      | Temp | Light | Chl a  | Chl b  | Cell Count | Group                        | Source                                                         | Chl a                              | Chl b | Other                                                                            |
|---------------------------------|-----------|------------------------------------------------------------------|-----------------------------------------------------------|------|-------|--------|--------|------------|------------------------------|----------------------------------------------------------------|------------------------------------|-------|----------------------------------------------------------------------------------|
| 73. <i>Gonyaulax tamarensis</i> | C         | $10^{-3} \mu\text{mol O}_2 (\mu\text{g C})^{-1} \text{ hr}^{-1}$ | 1.13                                                      | 21   | 15    | 42.000 | 13036  |            | Myzozoa: Dinophyceae         | Langdon 1987                                                   | 0.023                              |       | C/V=0.195 pg/ $\mu\text{m}^3$<br>C/N=7.2<br>C/Chl a=57.0<br>C/cell=2539 pg       |
| 74. <i>Gonyaulax tamarensis</i> | C         | $10^{-3} \mu\text{mol O}_2 (\mu\text{g C})^{-1} \text{ hr}^{-1}$ | 1.22                                                      | 22.8 | 15    | 45.600 | 13306  |            | Myzozoa: Dinophyceae         | Langdon 1987                                                   | 0.098                              |       | C/V=0.209 pg/ $\mu\text{m}^3$<br>C/N=8.2<br>C/Chl a=90.0<br>C/cell=2776 pg       |
| 75. <i>Gonyaulax tamarensis</i> | C         | $10^{-3} \mu\text{mol O}_2 (\mu\text{g C})^{-1} \text{ hr}^{-1}$ | 1.52                                                      | 28.4 | 15    | 56.800 | 16210  |            | Myzozoa: Dinophyceae         | Langdon 1987                                                   | 0.600                              |       | C/V=0.249 pg/ $\mu\text{m}^3$<br>C/N=9.0<br>C/Chl a=172.0<br>C/cell=4035 pg      |
| 76. <i>Gonyaulax tamarensis</i> | C         | $10^{-3} \mu\text{mol O}_2 (\mu\text{g C})^{-1} \text{ hr}^{-1}$ | 1.58                                                      | 29.5 | 15    | 59.000 | 10653  |            | Myzozoa: Dinophyceae         | Langdon 1987                                                   | 0.580                              |       | C/V=0.184 pg/ $\mu\text{m}^3$<br>C/N=8.2<br>C/Chl a=171.0<br>C/cell=1957 pg      |
| 77. <i>Gymnodinium nelsoni</i>  | W         | MIN                                                              | $\text{ml O}_2 (10^8 \text{ cells})^{-1} \text{ hr}^{-1}$ | 28.5 | 1.1   | 20     | 1.556  | 148000     | Myzozoa: Dinophyceae         | Vladimirova & Zotin 1983, 1985 (data of Hochachka & Teal 1964) |                                    |       |                                                                                  |
| 78. <i>Isochrysis galbana</i>   | C         | MIN                                                              | $\text{g C (g cell C)}^{-1} \text{ hr}^{-1}$              | 0.09 | 5.8   | 18     | 9.422  | 30         | Haptophyta: Prymnesiophyceae | Herzig & Falkowski 1989                                        | growth rate 0.18 day <sup>-1</sup> |       | C/cell=18pg<br>N/cell=1pg<br>C/V=0.6 pg/ $\mu\text{m}^3$<br>Chl a/cell=0.07pg    |
| 79. <i>Isochrysis galbana</i>   | C         |                                                                  | $\text{g C (g cell C)}^{-1} \text{ hr}^{-1}$              | 0.09 | 5.8   | 18     | 9.422  | 30         | Haptophyta: Prymnesiophyceae | Herzig & Falkowski 1989                                        | growth rate 0.25 day <sup>-1</sup> |       | C/cell=16pg<br>N/cell=1.2pg<br>C/V=0.54 pg/ $\mu\text{m}^3$<br>Chl a/cell=0.08pg |
| 80. <i>Isochrysis galbana</i>   | C         |                                                                  | $\text{g C (g cell C)}^{-1} \text{ hr}^{-1}$              | 0.10 | 6.5   | 18     | 10.559 | 30         | Haptophyta: Prymnesiophyceae | Herzig & Falkowski 1989                                        | growth rate 0.37 day <sup>-1</sup> |       | C/cell=15pg<br>N/cell=1.3pg<br>C/V=0.5pg/ $\mu\text{m}^3$<br>Chl a/cell=0.11pg   |
| 81. <i>Isochrysis galbana</i>   | C         |                                                                  | $\text{g C (g cell C)}^{-1} \text{ hr}^{-1}$              | 0.12 | 7.8   | 18     | 12.671 | 32         | Haptophyta: Prymnesiophyceae | Herzig & Falkowski 1989                                        | growth rate 0.48 day <sup>-1</sup> |       | C/cell=15pg<br>N/cell=1.4pg<br>C/V=0.44 pg/ $\mu\text{m}^3$<br>Chl a/cell=0.11pg |
| 82. <i>Isochrysis galbana</i>   | C         |                                                                  | $\text{g C (g cell C)}^{-1} \text{ hr}^{-1}$              | 0.12 | 7.8   | 18     | 12.671 | 33         | Haptophyta: Prymnesiophyceae | Herzig & Falkowski 1989                                        | growth rate 0.53 day <sup>-1</sup> |       | C/cell=14pg<br>N/cell=1.4pg<br>C/V=0.43 pg/ $\mu\text{m}^3$<br>Chl a/cell=0.11pg |
| 83. <i>Isochrysis galbana</i>   | C         |                                                                  | $\text{g C (g cell C)}^{-1} \text{ hr}^{-1}$              | 0.12 | 7.8   | 18     | 12.671 | 31         | Haptophyta: Prymnesiophyceae | Herzig & Falkowski 1989                                        | growth rate 0.59 day <sup>-1</sup> |       | C/cell=13pg<br>N/cell=1.4pg<br>C/V=0.42 pg/ $\mu\text{m}^3$<br>Chl a/cell=0.12pg |
| 84. <i>Isochrysis galbana</i>   | C         |                                                                  | $\text{g C (g cell C)}^{-1} \text{ hr}^{-1}$              | 0.15 | 9.7   | 18     | 15.758 | 34         | Haptophyta: Prymnesiophyceae | Herzig & Falkowski 1989                                        | growth rate 0.72 day <sup>-1</sup> |       | C/cell=13pg<br>N/cell=1.5pg<br>C/V=0.38 pg/ $\mu\text{m}^3$<br>Chl a/cell=0.13pg |

|                            |   |     |                                                                                                         |        |      |    |        |      |                                         |                            |                                                                                                                                                                               |                                                                                                                                                                                      |     |
|----------------------------|---|-----|---------------------------------------------------------------------------------------------------------|--------|------|----|--------|------|-----------------------------------------|----------------------------|-------------------------------------------------------------------------------------------------------------------------------------------------------------------------------|--------------------------------------------------------------------------------------------------------------------------------------------------------------------------------------|-----|
| 85. Isochrysis galbana     | C |     | g C (g cell C) <sup>-1</sup> hr <sup>-1</sup>                                                           | 0.18   | 11.7 | 18 | 19.007 | 34   | Haptophyta:<br>Prymnesiophyceae         | Herzig & Falkowski<br>1989 | growth<br>rate 0.87<br>day <sup>-1</sup>                                                                                                                                      | C/cell=11pg<br>N/cell=1.5pg<br>C/V=0.32 pg/μm <sup>3</sup><br>Chl a/cell=0.13                                                                                                        | 5.7 |
| 86. Isochrysis galbana     | C |     | μmol O <sub>2</sub> cell <sup>-1</sup> min <sup>-1</sup> ×<br>10 <sup>10</sup> at 10.3 pg C per<br>cell | 1.1    | 12   | 18 | 19.494 | 37   | Haptophyta:<br>Prymnesiophyceae         | Falkowski et al.<br>1985   | 0.30 (30<br>μmol m <sup>-2</sup><br>s <sup>-1</sup> );<br>steady<br>growth                                                                                                    | C/cell=10.3 pg<br>C/V=0.278 pg/μm <sup>3</sup><br>C/N=6.3<br>Chl/C=2.38%                                                                                                             | 5.0 |
| 87. Isochrysis galbana     | C |     | μmol O <sub>2</sub> cell <sup>-1</sup> min <sup>-1</sup> ×<br>10 <sup>10</sup> at 12.4 pg C per<br>cell | 1.3    | 12   | 18 | 19.494 | 50   | Haptophyta:<br>Prymnesiophyceae         | Falkowski et al.<br>1985   | 0.70 (70<br>μmol m <sup>-2</sup><br>s <sup>-1</sup> );<br>steady<br>growth                                                                                                    | C/cell=12.4 pg<br>C/V=0.248 pg/μm <sup>3</sup><br>C/N=5.5<br>Chl/C=1.72%                                                                                                             | 4.3 |
| 88. Isochrysis galbana     | C |     | μmol O <sub>2</sub> cell <sup>-1</sup> min <sup>-1</sup> ×<br>10 <sup>10</sup> at 20.0 pg C per<br>cell | 2.3    | 13   | 18 | 21.119 | 57   | Haptophyta:<br>Prymnesiophyceae         | Falkowski et al.<br>1985   | 1.2 (600<br>μmol m <sup>-2</sup><br>s <sup>-1</sup> );<br>steady<br>growth                                                                                                    | C/cell=20.0 pg<br>C/V=0.351 pg/μm <sup>3</sup><br>C/N=7.5<br>Chl/C=0.58%                                                                                                             | 6.4 |
| 89. Isochrysis galbana     | C |     | g C (g cell C) <sup>-1</sup> hr <sup>-1</sup> at<br>10 pg C per cell                                    | 0.20   | 13   | 18 | 21.119 | 33   | Haptophyta:<br>Prymnesiophyceae         | Herzig & Falkowski<br>1989 | growth<br>rate 0.96<br>day <sup>-1</sup>                                                                                                                                      | C/cell=10pg<br>N/cell=1.5pg<br>C/V=0.3pg/μm <sup>3</sup><br>Chl a/cell=0.13pg                                                                                                        | 5.8 |
| 90. Isochrysis galbana     | C |     | μmol O <sub>2</sub> cell <sup>-1</sup> min <sup>-1</sup> ×<br>10 <sup>10</sup> at 15 pg C per<br>cell   | 2.0    | 15   | 18 | 24.368 | 55   | Haptophyta:<br>Prymnesiophyceae         | Falkowski et al.<br>1985   | 1.10 (150<br>μmol m <sup>-2</sup><br>s <sup>-1</sup> );<br>steady<br>growth                                                                                                   | C/cell=15.0 pg<br>C/V=0.273 pg/μm <sup>3</sup><br>C/N=5.7<br>Chl/C=1.37%                                                                                                             | 5.7 |
| 91. Isochrysis galbana     | C |     | μmol O <sub>2</sub> cell <sup>-1</sup> min <sup>-1</sup> ×<br>10 <sup>10</sup> at 16.5 pg C per<br>cell | 2.2    | 20   | 18 | 32.490 | 52   | Haptophyta:<br>Prymnesiophyceae         | Falkowski et al.<br>1985   | 1.2 (320<br>μmol m <sup>-2</sup><br>s <sup>-1</sup> );<br>steady<br>growth                                                                                                    | C/cell=16.5 pg<br>C/V=0.317 pg/μm <sup>3</sup><br>C/N=3.7<br>Chl/C=0.88%                                                                                                             | 4.9 |
| 92. Leptocylindrus danicus | C | MIN | pg C (pg cell C) <sup>-1</sup> hr <sup>-1</sup>                                                         | 0.0025 | 4    | 15 | 8.000  | 1158 | Bacillariophyta:<br>Coscinodiscophyceae | Verity 1981, 1982a,b       | mean<br>minimum<br>value<br>among 49<br>combinatio<br>ns of<br>temperatur<br>e,<br>daylength<br>and<br>irradiance,<br>growth<br>rates from<br>0.1 to 3.0<br>day <sup>-1</sup> | log C(pg)=0.707 log<br>V(μm <sup>3</sup> ) -0.225<br>log N(pg)=0.718 log<br>V(μm <sup>3</sup> ) -1.024<br>C/Chl a=20-100<br>depending on<br>temperature and day<br>length<br>C/N=5.8 | 1.5 |



|                                   |   |     |                                                                                                               |                      |     |    |        |      |                                       |                                                                                                                |                           |                                                                                                                 |     |
|-----------------------------------|---|-----|---------------------------------------------------------------------------------------------------------------|----------------------|-----|----|--------|------|---------------------------------------|----------------------------------------------------------------------------------------------------------------|---------------------------|-----------------------------------------------------------------------------------------------------------------|-----|
| 93. <i>Monochrysis lutheri</i>    | C | MIN | g C (g cell C) <sup>-1</sup> hr <sup>-1</sup>                                                                 | 0.0052               | 8   | 20 | 11.314 | [40] | Haptophyta:<br>Prymnesiophyceae?      | Laws & Caperon 1976 [estimated from C content using the formula of Verity et al. 1992 for non-diatomous algae] | 0.19                      | C/cell=11.3 pg<br>N/cell=0.885 pg<br>[Verity et al. 1992: C/V (pg/μm <sup>3</sup> )=0.545×V <sup>-0.181</sup> ] | 6.9 |
| 94. <i>Monochrysis lutheri</i>    | C |     | g C (g cell C) <sup>-1</sup> hr <sup>-1</sup>                                                                 | 0.0054               | 8.4 | 20 | 11.879 | [25] | Haptophyta:<br>Prymnesiophyceae?      | Laws & Caperon 1976 [estimated from C content using the formula of Verity et al. 1992 for non-diatomous algae] | 0.38                      | C/cell=7.58 pg<br>N/cell=0.854 pg<br>[Verity et al. 1992: C/V (pg/μm <sup>3</sup> )=0.545×V <sup>-0.181</sup> ] | 5.0 |
| 95. <i>Monochrysis lutheri</i>    | C |     | g C (g cell C) <sup>-1</sup> hr <sup>-1</sup>                                                                 | 0.0082               | 13  | 20 | 18.385 | [26] | Haptophyta:<br>Prymnesiophyceae?      | Laws & Caperon 1976 [estimated from C content using the formula of Verity et al. 1992 for non-diatomous algae] | 0.60                      | C/cell=7.87 pg<br>N/cell=1.058 pg<br>[Verity et al. 1992: C/V (pg/μm <sup>3</sup> )=0.545×V <sup>-0.181</sup> ] | 6.4 |
| 96. <i>Monochrysis lutheri</i>    | C |     | g C (g cell C) <sup>-1</sup> hr <sup>-1</sup>                                                                 | 0.0091               | 14  | 20 | 19.799 | [29] | Haptophyta:<br>Prymnesiophyceae?      | Laws & Caperon 1976 [estimated from C content using the formula of Verity et al. 1992 for non-diatomous algae] | 0.77                      | C/cell=8.62 pg<br>N/cell=1.289 pg<br>[Verity et al. 1992: C/V (pg/μm <sup>3</sup> )=0.545×V <sup>-0.181</sup> ] | 6.2 |
| 97. <i>Nannochloris atomus</i>    | C | MIN | pg C (pg cell C) <sup>-1</sup> day <sup>-1</sup>                                                              | 0.14                 | 9   | 23 | 10.338 | [6]  | Chlorophyta:<br>Chlorophyceae         | Geider & Osborne 1989 [Sobrino et al. 2005, diam 2 μm, 0.025 pg Chl a/cell]                                    |                           |                                                                                                                 |     |
| 98. <i>Navicula pelliculosa</i>   | D | MIN | μmol O <sub>2</sub> (10 <sup>8</sup> cells) <sup>-1</sup> hr <sup>-1</sup> at 28.6 pg DM (cell) <sup>-1</sup> | 2                    | 13  | 20 | 18.385 | [95] | Bacillariophyta:<br>Bacillariophyceae | Coombs et al. 1967a,b [calculated from dry mass]                                                               |                           | Pr/DM=0.393<br>C/DM=0.412<br>Carbohydr./DM=0.154<br>Lipids/DM=0.338                                             |     |
| 99. <i>Ochromonas malhamensis</i> | D | MIN | μl O <sub>2</sub> (mg DM) <sup>-1</sup> hr <sup>-1</sup>                                                      | 15                   | 25  | 28 | 20.306 |      | Ochrophyta:<br>Chrysophyceae          | Weiss & Brown 1959                                                                                             | starved 24 hr in the dark |                                                                                                                 |     |
| 100. <i>Ochromonas</i> sp.        | W | MIN | nl O <sub>2</sub> (cell) <sup>-1</sup> hr <sup>-1</sup>                                                       | 7.0×10 <sup>-5</sup> | 5.6 | 20 | 7.920  | 70   | Ochrophyta:<br>Chrysophyceae          | Fenchel & Finlay 1983                                                                                          | starved                   |                                                                                                                 |     |
| 101. <i>Olisthodiscus luteus</i>  | C |     | 10 <sup>-3</sup> μmol O <sub>2</sub> (μg C) <sup>-1</sup> hr <sup>-1</sup>                                    | 0.26                 | 4.9 | 15 | 9.800  | 1023 | Ochrophyta:<br>Raphidophyceae         | Langdon 1987                                                                                                   | 0.340                     | C/V=0.199 pg/μm <sup>3</sup><br>C/N=7.9<br>C/Chl a=46.0<br>C/cell=204 pg                                        | 2.6 |
| 102. <i>Olisthodiscus luteus</i>  | C |     | 10 <sup>-3</sup> μmol O <sub>2</sub> (μg C) <sup>-1</sup> hr <sup>-1</sup>                                    | 0.34                 | 6.4 | 15 | 12.800 | 905  | Ochrophyta:<br>Raphidophyceae         | Langdon 1987                                                                                                   | 0.610                     | C/V=0.229 pg/μm <sup>3</sup><br>C/N=8.3<br>C/Chl a=46.0<br>C/cell=207 pg                                        | 3.5 |
| 103. <i>Olisthodiscus luteus</i>  | C |     | 10 <sup>-3</sup> μmol O <sub>2</sub> (μg C) <sup>-1</sup> hr <sup>-1</sup>                                    | 0.38                 | 7.1 | 15 | 14.200 | 945  | Ochrophyta:<br>Raphidophyceae         | Langdon 1987                                                                                                   | 0.174                     | C/V=0.194 pg/μm <sup>3</sup><br>C/N=7.5<br>C/Chl a=33.0<br>C/cell=183 pg                                        | 3.6 |

|                                       |     |     |                                                                                           |      |      |      |        |         |                                       |                                                        |                                |                                                                           |     |
|---------------------------------------|-----|-----|-------------------------------------------------------------------------------------------|------|------|------|--------|---------|---------------------------------------|--------------------------------------------------------|--------------------------------|---------------------------------------------------------------------------|-----|
| 104. <i>Olisthodiscus luteus</i>      | C   |     | $10^{-3} \mu\text{mol O}_2 (\mu\text{g C})^{-1} \text{ hr}^{-1}$                          | 0.47 | 8.8  | 15   | 17.600 | 833     | Ochrophyta:<br>Raphidophyceae         | Langdon 1987                                           | 0.056                          | C/V=0.202 pg/ $\mu\text{m}^3$<br>C/N=7.5<br>C/Chl a=38.0<br>C/cell=168 pg | 4.4 |
| 105. <i>Olisthodiscus luteus</i>      | C   |     | $10^{-3} \mu\text{mol O}_2 (\mu\text{g C})^{-1} \text{ hr}^{-1}$                          | 0.56 | 10.5 | 15   | 21.000 | 1124    | Ochrophyta:<br>Raphidophyceae         | Langdon 1987                                           | 0.880                          | C/V=0.266 pg/ $\mu\text{m}^3$<br>C/N=9.5<br>C/Chl a=73.5<br>C/cell=299 pg | 6.7 |
| 106. <i>Olisthodiscus luteus</i>      | C   |     | $10^{-3} \mu\text{mol O}_2 (\mu\text{g C})^{-1} \text{ hr}^{-1}$                          | 0.70 | 13.1 | 15   | 26.200 | 1150    | Ochrophyta:<br>Raphidophyceae         | Langdon 1987                                           | 0.810                          | C/V=0.273 pg/ $\mu\text{m}^3$<br>C/N=9.7<br>C/Chl a=62.0<br>C/cell=314 pg | 8.5 |
| 107. <i>Peridinium gatunense</i>      | Chl | MIN | $\mu\text{mol O}_2 (5 \text{ mg Chl})^{-1} \text{ min}^{-1}$                              | 5    | 33   | 22   | 40.628 | [10000] | Myzozoa: Dinophyceae                  | Sukenik et al. 2002, Fig. 5 [Berman-Frank & Erez 1996] |                                |                                                                           |     |
| 108. <i>Phaeocystis globosa</i>       | Chl | MIN | $\text{mg O}_2 (\text{mg Chl})^{-1} \text{ hr}^{-1}$                                      | 1.49 | 26   | 17.5 | 43.727 | [106]   | Haptophyta:<br>Prymnesiophyceae       | Flameling & Kromkamp 1998 [Olenina et al. 2006]        | cells dark-adapted for 15 mins |                                                                           |     |
| 109. <i>Phaeocystis globosa</i>       | Chl |     | $\text{mg O}_2 (\text{mg Chl})^{-1} \text{ hr}^{-1}$                                      | 1.83 | 32   | 17.5 | 53.817 | [106]   | Haptophyta:<br>Prymnesiophyceae       | Flameling & Kromkamp 1998 [Olenina et al. 2006]        | cells dark-adapted for 15 mins |                                                                           |     |
| 110. <i>Phaeocystis globosa</i>       | Chl |     | $\text{mg O}_2 (\text{mg Chl})^{-1} \text{ hr}^{-1}$                                      | 2.63 | 46   | 17.5 | 77.362 | [106]   | Haptophyta:<br>Prymnesiophyceae       | Flameling & Kromkamp 1998 [Olenina et al. 2006]        | cells dark-adapted for 15 mins |                                                                           |     |
| 111. <i>Phaeodactylum tricornutum</i> | C   | MIN | $10^{-5} \text{ mol O}_2 (\text{mol C})^{-1} \text{ s}^{-1}$                              | 0.38 | 21   | 18   | 34.115 | [120]   | Bacillariophyta:<br>Bacillariophyceae | Quigg & Beardall 2003 [Glover et al. 1987]             | 1.2                            |                                                                           |     |
| 112. <i>Phaeodactylum tricornutum</i> | Chl |     | $\text{mg O}_2 (\text{mg Chl})^{-1} \text{ hr}^{-1}$                                      | 1.23 | 21   | 15   | 42.000 | [120]   | Bacillariophyta:<br>Bacillariophyceae | Flameling & Kromkamp 1998 [Glover et al. 1987]         | cells dark-adapted for 15 mins |                                                                           |     |
| 113. <i>Phaeodactylum tricornutum</i> | Chl |     | $\text{mg O}_2 (\text{mg Chl})^{-1} \text{ hr}^{-1}$                                      | 1.33 | 23   | 15   | 46.000 | [120]   | Bacillariophyta:<br>Bacillariophyceae | Flameling & Kromkamp 1998 [Glover et al. 1987]         | cells dark-adapted for 15 mins |                                                                           |     |
| 114. <i>Phaeodactylum tricornutum</i> | C   |     | $10^{-5} \text{ mol O}_2 (\text{mol C})^{-1} \text{ s}^{-1}$                              | 0.51 | 29   | 18   | 47.111 | [120]   | Bacillariophyta:<br>Bacillariophyceae | Quigg & Beardall 2003 [Glover et al. 1987]             | 0.55                           | Chl a/C=4.5%<br>Pr/cell=3.49 pg<br>C/N=4.9                                | 9.3 |
| 115. <i>Phaeodactylum tricornutum</i> | Chl |     | $\text{mg O}_2 (\text{mg Chl})^{-1} \text{ hr}^{-1}$                                      | 1.49 | 26   | 15   | 52.000 | [120]   | Bacillariophyta:<br>Bacillariophyceae | Flameling & Kromkamp 1998 [Glover et al. 1987]         | cells dark-adapted for 15 mins |                                                                           |     |
| 116. <i>Phaeodactylum tricornutum</i> | C   |     | $10^{-5} \text{ mol O}_2 (\text{mol C})^{-1} \text{ s}^{-1}$                              | 0.63 | 35   | 18   | 56.858 | [120]   | Bacillariophyta:<br>Bacillariophyceae | Quigg & Beardall 2003 [Glover et al. 1987]             | 0.2                            | Chl a/C=4.6%<br>Pr/cell=2.73 pg<br>C/N=4.4                                | 10  |
| 117. <i>Phaeodactylum tricornutum</i> | C   |     | $\mu\text{mol O}_2 \text{ cell}^{-1} \text{ min}^{-1} \times 10^{10}$ at 13 pg C per cell | 4.21 | 36   | 18   | 58.482 | [60]    | Bacillariophyta:<br>Bacillariophyceae | Greene et al. 1991 [calculated from Chl a content]     |                                | Chl a/cell=0.250 pg<br>Chl a/C=1.94%<br>C/N=5.3                           | 13  |

|                                       |     |     |                                                                                                              |      |     |    |        |       |                                       |                                                        |                                                                      |                                                                                 |     |
|---------------------------------------|-----|-----|--------------------------------------------------------------------------------------------------------------|------|-----|----|--------|-------|---------------------------------------|--------------------------------------------------------|----------------------------------------------------------------------|---------------------------------------------------------------------------------|-----|
| 118. <i>Phaeodactylum tricornutum</i> | C   |     | $10^{-5} \text{ mol O}_2 (\text{mol C})^{-1} \text{ s}^{-1}$                                                 | 0.67 | 38  | 18 | 61.731 | [120] | Bacillariophyta:<br>Bacillariophyceae | Quigg & Beardall 2003 [Glover et al. 1987]             | 0.95                                                                 | Chl a/C=3.4%<br>C/N=4.4                                                         | 11  |
| 119. <i>Phaeodactylum tricornutum</i> | C   |     | $10^{-5} \text{ mol O}_2 (\text{mol C})^{-1} \text{ s}^{-1}$                                                 | 0.76 | 43  | 18 | 69.854 | [120] | Bacillariophyta:<br>Bacillariophyceae | Quigg & Beardall 2003 [Glover et al. 1987]             | 1.15                                                                 | Chl a/C=2.1%<br>Pr/cell=2.34 pg<br>C/N=5.3                                      | 15  |
| 120. <i>Phaeodactylum tricornutum</i> | C   |     | $10^{-5} \text{ mol O}_2 (\text{mol C})^{-1} \text{ s}^{-1}$                                                 | 0.80 | 45  | 18 | 73.103 | [120] | Bacillariophyta:<br>Bacillariophyceae | Quigg & Beardall 2003 [Glover et al. 1987]             | 1                                                                    | Chl a/C=5.6%<br>C/N=4.6                                                         | 14  |
| 121. <i>Phaeodactylum tricornutum</i> | C   |     | $10^{-5} \text{ mol O}_2 (\text{mol C})^{-1} \text{ s}^{-1}$                                                 | 0.93 | 52  | 18 | 84.474 | [120] | Bacillariophyta:<br>Bacillariophyceae | Quigg & Beardall 2003 [Glover et al. 1987]             | 0.4                                                                  | Chl a/C=7.5%<br>Pr/cell=3.85 pg                                                 |     |
| 122. <i>Prorocentrum micans</i>       | C   | MIN | $\mu\text{mol O}_2 \text{ cell}^{-1} \text{ min}^{-1} \times 10^{10} \text{ at } 1068 \text{ pg C per cell}$ | 70   | 7.3 | 18 | 11.859 | 4340  | Myzozoa: Dinophyceae                  | Falkowski et al. 1985                                  | 0.075 (70 $\mu\text{mol m}^{-2} \text{ s}^{-1}$ );<br>steady growth  | C/cell=1068 pg<br>C/V=0.246 $\text{pg}/\mu\text{m}^3$<br>C/N=3.7<br>Chl/C=0.62% | 0.5 |
| 123. <i>Prorocentrum micans</i>       | C   |     | $\mu\text{mol O}_2 \text{ cell}^{-1} \text{ min}^{-1} \times 10^{10} \text{ at } 1096 \text{ pg C per cell}$ | 85   | 8.7 | 18 | 14.133 | 5096  | Myzozoa: Dinophyceae                  | Falkowski et al. 1985                                  | 0.108 (150 $\mu\text{mol m}^{-2} \text{ s}^{-1}$ );<br>steady growth | C/cell=1096 pg<br>C/V=0.215 $\text{pg}/\mu\text{m}^3$<br>C/N=4.1<br>Chl/C=0.47% | 2.0 |
| 124. <i>Prorocentrum micans</i>       | C   |     | $\mu\text{mol O}_2 \text{ cell}^{-1} \text{ min}^{-1} \times 10^{10} \text{ at } 1117 \text{ pg C per cell}$ | 125  | 13  | 18 | 21.119 | 5122  | Myzozoa: Dinophyceae                  | Falkowski et al. 1985                                  | 0.164 (320 $\mu\text{mol m}^{-2} \text{ s}^{-1}$ );<br>steady growth | C/cell=1117 pg<br>C/V=0.218 $\text{pg}/\mu\text{m}^3$<br>C/N=4.1<br>Chl/C=0.29% | 3.4 |
| 125. <i>Prorocentrum micans</i>       | C   |     | $\mu\text{mol O}_2 \text{ cell}^{-1} \text{ min}^{-1} \times 10^{10} \text{ at } 1178 \text{ pg C per cell}$ | 150  | 14  | 18 | 22.743 | 5350  | Myzozoa: Dinophyceae                  | Falkowski et al. 1985                                  | 0.178 (600 $\mu\text{mol m}^{-2} \text{ s}^{-1}$ );<br>steady growth | C/cell=1178 pg<br>C/V=0.220 $\text{pg}/\mu\text{m}^3$<br>C/N=3.9<br>Chl/C=0.24% | 3.7 |
| 126. <i>Scenedesmus obliquus</i>      | W   | MIN | $\text{ml O}_2 (10^8 \text{ cells})^{-1} \text{ hr}^{-1}$                                                    | 0.04 | 1   | 20 | 1.414  | 220   | Chlorophyta:<br>Chlorophyceae         | Vladimirova & Zotin 1983, 1985 (data of Margalef 1954) |                                                                      |                                                                                 |     |
| 127. <i>Scenedesmus protuberans</i>   | Chl | MIN | $\text{mg O}_2 (\text{mg Chl})^{-1} \text{ hr}^{-1}$                                                         | 0.36 | 6.3 | 20 | 8.910  |       | Chlorophyta:<br>Chlorophyceae         | Flameling & Kromkamp 1998                              | cells dark-adapted for 15 mins                                       |                                                                                 |     |
| 128. <i>Scenedesmus protuberans</i>   | Chl |     | $\text{mg O}_2 (\text{mg Chl})^{-1} \text{ hr}^{-1}$                                                         | 0.50 | 8.7 | 20 | 12.304 |       | Chlorophyta:<br>Chlorophyceae         | Flameling & Kromkamp 1998                              | cells dark-adapted for 15 mins                                       |                                                                                 |     |
| 129. <i>Scenedesmus protuberans</i>   | Chl |     | $\text{mg O}_2 (\text{mg Chl})^{-1} \text{ hr}^{-1}$                                                         | 0.67 | 12  | 20 | 16.971 |       | Chlorophyta:<br>Chlorophyceae         | Flameling & Kromkamp 1998                              | cells dark-adapted for 15 mins                                       |                                                                                 |     |

| Species                               | Condition | Measurement | Value 1                                                                                | Value 2 | Value 3 | Value 4 | Value 5 | Value 6 | Group                      | Source                                     | Notes                                                            | Value 7                                                                                                                                    |     |
|---------------------------------------|-----------|-------------|----------------------------------------------------------------------------------------|---------|---------|---------|---------|---------|----------------------------|--------------------------------------------|------------------------------------------------------------------|--------------------------------------------------------------------------------------------------------------------------------------------|-----|
| 130. <i>Scenedesmus quadricauda</i>   | C         | MIN         | $\mu\text{mol O}_2 (\text{mg C})^{-1} (6 \text{ hr})^{-1}$                             | 1.3     | 4       | 20      | 5.657   | [80]    | Chlorophyta: Chlorophyceae | Healey 1979 [calculated from C content]    | 3 days of nitrate deprivation                                    | C/cell=8 pg<br>C/N=15<br>C/P=33<br>Chl a/C=0.8%<br>Pr/C=0.45<br>Carbohydr/C=0.81                                                           | 4.0 |
| 131. <i>Scenedesmus quadricauda</i>   | C         |             | $\mu\text{mol O}_2 (\text{mg C})^{-1} (6 \text{ hr})^{-1}$                             | 1.4     | 4.4     | 20      | 6.223   | [70]    | Chlorophyta: Chlorophyceae | Healey 1979 [calculated from C content]    | 7 days of P deprivation                                          | C/cell=10 pg<br>C/N=6.2<br>C/P=204<br>Chl a/C=1.5%<br>Pr/C=0.72<br>Carbohydr/C=0.82                                                        | 1.8 |
| 132. <i>Scenedesmus quadricauda</i>   | C         |             | $\mu\text{mol O}_2 (\text{mg C})^{-1} (6 \text{ hr})^{-1}$                             | 2.0     | 6.2     | 20      | 8.768   |         | Chlorophyta: Chlorophyceae | Healey 1979                                | addition of N after 3 days of nitrate deprivation                | 24 hr after addition of N to 2 days' N-starved cells:<br>C/cell=9pg<br>C/N=5.1<br>C/P=19<br>Chl a/C=1.3%<br>Pr/C=0.72<br>Carbohydr/C=0.72  |     |
| 133. <i>Scenedesmus quadricauda</i>   | C         |             | $\mu\text{mol O}_2 (\text{mg C})^{-1} (6 \text{ hr})^{-1}$                             | 2.2     | 6.8     | 20      | 9.617   |         | Chlorophyta: Chlorophyceae | Healey 1979                                | addition of P after 7 days of P deprivation                      | 36 hr after addition of P to 3 days' P-starved cells:<br>C/cell=12pg<br>C/N=4.7<br>C/P=26<br>Chl a/C=3.4%<br>Pr/C=0.98<br>Carbohydr/C=0.54 |     |
| 134. <i>Selenastrum capricornutum</i> | Chl       | MIN         | $\text{nmol O}_2 (10^6 \text{ cells})^{-1} \text{ min}^{-1}$ at 0.31 pg Chl a per cell | 0.12    | 13      | 21      | 17.154  | [50]    | Chlorophyta: Chlorophyceae | Beardall et al. 1997 [Hall & Golding 1998] | (550 $\mu\text{mol m}^{-2} \text{ s}^{-1}$ ; 22 hr in darkness)  |                                                                                                                                            |     |
| 135. <i>Selenastrum capricornutum</i> | Chl       |             | $\text{nmol O}_2 (10^6 \text{ cells})^{-1} \text{ min}^{-1}$ at 0.35 pg Chl a per cell | 0.15    | 14      | 21      | 18.473  | [50]    | Chlorophyta: Chlorophyceae | Beardall et al. 1997 [Hall & Golding 1998] | (100 $\mu\text{mol m}^{-2} \text{ s}^{-1}$ ; 0 hr in darkness)   |                                                                                                                                            |     |
| 136. <i>Selenastrum capricornutum</i> | Chl       |             | $\text{nmol O}_2 (10^6 \text{ cells})^{-1} \text{ min}^{-1}$ at 0.29 pg Chl a per cell | 0.12    | 14      | 21      | 18.473  | [50]    | Chlorophyta: Chlorophyceae | Beardall et al. 1997 [Hall & Golding 1998] | (100 $\mu\text{mol m}^{-2} \text{ s}^{-1}$ ; 3.8 hr in darkness) |                                                                                                                                            |     |
| 137. <i>Selenastrum capricornutum</i> | Chl       |             | $\text{nmol O}_2 (10^6 \text{ cells})^{-1} \text{ min}^{-1}$ at 0.38 pg Chl a per cell | 0.16    | 14      | 21      | 18.473  | [50]    | Chlorophyta: Chlorophyceae | Beardall et al. 1997 [Hall & Golding 1998] | (100 $\mu\text{mol m}^{-2} \text{ s}^{-1}$ ; 22 hr in darkness)  |                                                                                                                                            |     |
| 138. <i>Selenastrum capricornutum</i> | Chl       |             | $\text{nmol O}_2 (10^6 \text{ cells})^{-1} \text{ min}^{-1}$ at 0.28 pg Chl a per cell | 0.14    | 17      | 21      | 22.432  | [50]    | Chlorophyta: Chlorophyceae | Beardall et al. 1997 [Hall & Golding 1998] | (300 $\mu\text{mol m}^{-2} \text{ s}^{-1}$ ; 22 hr in darkness)  |                                                                                                                                            |     |

|                                |     |     |                                                                                                       |        |      |    |        |      |                                      |                                            |                                                                 |                                                                         |     |
|--------------------------------|-----|-----|-------------------------------------------------------------------------------------------------------|--------|------|----|--------|------|--------------------------------------|--------------------------------------------|-----------------------------------------------------------------|-------------------------------------------------------------------------|-----|
| 139. Selenastrum capricornutum | Chl |     | nmol O <sub>2</sub> (10 <sup>6</sup> cells) <sup>-1</sup> min <sup>-1</sup> at 0.22 pg Chl a per cell | 0.14   | 21   | 21 | 27.710 | [50] | Chlorophyta: Chlorophyceae           | Beardall et al. 1997 [Hall & Golding 1998] | (300 μmol m <sup>-2</sup> s <sup>-1</sup> ; 3.8 hr in darkness) |                                                                         |     |
| 140. Selenastrum capricornutum | Chl |     | nmol O <sub>2</sub> (10 <sup>6</sup> cells) <sup>-1</sup> min <sup>-1</sup> at 0.32 pg Chl a per cell | 0.20   | 21   | 21 | 27.710 | [50] | Chlorophyta: Chlorophyceae           | Beardall et al. 1997 [Hall & Golding 1998] | (550 μmol m <sup>-2</sup> s <sup>-1</sup> ; 3.8 hr in darkness) |                                                                         |     |
| 141. Selenastrum capricornutum | Chl |     | nmol O <sub>2</sub> (10 <sup>6</sup> cells) <sup>-1</sup> min <sup>-1</sup> at 0.30 pg Chl a per cell | 0.23   | 26   | 21 | 34.307 | [50] | Chlorophyta: Chlorophyceae           | Beardall et al. 1997 [Hall & Golding 1998] | (300 μmol m <sup>-2</sup> s <sup>-1</sup> ; 0 hr in darkness)   |                                                                         |     |
| 142. Selenastrum capricornutum | Chl |     | nmol O <sub>2</sub> (10 <sup>6</sup> cells) <sup>-1</sup> min <sup>-1</sup> at 0.28 pg Chl a per cell | 0.48   | 57   | 21 | 75.212 | [50] | Chlorophyta: Chlorophyceae           | Beardall et al. 1997 [Hall & Golding 1998] | (550 μmol m <sup>-2</sup> s <sup>-1</sup> ; 0 hr in darkness)   |                                                                         |     |
| 143. Selenastrum minutum       | Chl | MIN | fmol O <sub>2</sub> cell <sup>-1</sup> hr <sup>-1</sup>                                               | 4      | 6.4  | 20 | 9.051  | 77   | Chlorophyta: Chlorophyceae           | Theodorou et al. 1991                      | 0.6                                                             | Chl/cell=0.235 pg                                                       |     |
| 144. Selenastrum minutum       | Chl |     | fmol O <sub>2</sub> cell <sup>-1</sup> hr <sup>-1</sup>                                               | 24     | 43   | 20 | 60.811 | 69   | Chlorophyta: Chlorophyceae           | Theodorou et al. 1991                      | 1.68                                                            | Chl/cell=0.717 pg                                                       |     |
| 145. Skeletonema costatum      | C   | MIN | 10 <sup>-3</sup> μmol O <sub>2</sub> (μg C) <sup>-1</sup> hr <sup>-1</sup>                            | 0.11   | 2.1  | 15 | 4.200  | 65   | Bacillariophyta: Coscinodiscophyceae | Langdon 1987                               | 0.056                                                           | C/cell=16 pg<br>C/V=0.246 pg/μm <sup>3</sup><br>C/N=6.8<br>C/Chl a=22.9 | 0.9 |
| 146. Skeletonema costatum      | C   |     | μmol O <sub>2</sub> cell <sup>-1</sup> min <sup>-1</sup> × 10 <sup>10</sup> at 14.6 pg C per cell     | 0.47   | 2.6  | 15 | 5.200  | 77   | Bacillariophyta: Coscinodiscophyceae | Falkowski & Owens 1980                     | 0.19; Log                                                       | C/V=0.260 pg/μm <sup>3</sup><br>C/N=4.5                                 | 0.7 |
| 147. Skeletonema costatum      | C   |     | μmol O <sub>2</sub> cell <sup>-1</sup> min <sup>-1</sup> × 10 <sup>10</sup> at 20 pg C per cell       | 0.59   | 3.3  | 15 | 6.600  | 79   | Bacillariophyta: Coscinodiscophyceae | Falkowski & Owens 1980                     | 0.28; Log                                                       | C/V=0.253 pg/μm <sup>3</sup><br>C/N=3.8                                 | 0.8 |
| 148. Skeletonema costatum      | C   |     | μmol O <sub>2</sub> cell <sup>-1</sup> min <sup>-1</sup> × 10 <sup>10</sup> at 19 pg C per cell       | 1.0    | 5.9  | 15 | 11.800 | 82   | Bacillariophyta: Coscinodiscophyceae | Falkowski & Owens 1980                     | 0.45; Log                                                       | C/V=0.232 pg/μm <sup>3</sup><br>C/N=4.3                                 | 1.7 |
| 149. Skeletonema costatum      | C   |     | g C (g cell C) <sup>-1</sup> hr <sup>-1</sup>                                                         | 0.0055 | 8.6  | 18 | 13.971 | 127  | Bacillariophyta: Coscinodiscophyceae | Blasco et al. 1982                         | 1.87; one division away from stationary phase                   | C/V=0.094 pg/μm <sup>3</sup><br>C/N=6.5<br>Chl a/C=1.56%                | 3.7 |
| 150. Skeletonema costatum      | C   |     | μmol O <sub>2</sub> cell <sup>-1</sup> min <sup>-1</sup> × 10 <sup>10</sup> at 17.5 pg C per cell     | 1.5    | 9.3  | 15 | 18.600 | 84   | Bacillariophyta: Coscinodiscophyceae | Falkowski & Owens 1980                     | 0.62; Log                                                       | C/V=0.214 pg/μm <sup>3</sup><br>C/N=3.4                                 | 2.1 |
| 151. Skeletonema costatum      | C   |     | 10 <sup>-3</sup> μmol O <sub>2</sub> (μg C) <sup>-1</sup> hr <sup>-1</sup>                            | 0.60   | 11.2 | 15 | 22.400 |      | Bacillariophyta: Coscinodiscophyceae | Langdon 1987                               | 0.330                                                           | C/cell=15 pg<br>C/N=8.2<br>C/Chl a=18.0                                 | 6.1 |
| 152. Skeletonema costatum      | Chl |     | μmol O <sub>2</sub> (mg Chl) <sup>-1</sup> hr <sup>-1</sup>                                           | 20     | 11.2 | 15 | 22.400 |      | Bacillariophyta: Coscinodiscophyceae | Smith et al. 1992                          |                                                                 |                                                                         |     |
| 153. Skeletonema costatum      | Chl |     | μmol O <sub>2</sub> (mg Chl) <sup>-1</sup> hr <sup>-1</sup>                                           | 23     | 13   | 15 | 26.000 |      | Bacillariophyta: Coscinodiscophyceae | Smith et al. 1992                          |                                                                 |                                                                         |     |
| 154. Skeletonema costatum      | C   |     | 10 <sup>-3</sup> μmol O <sub>2</sub> (μg C) <sup>-1</sup> hr <sup>-1</sup>                            | 0.80   | 14.9 | 15 | 29.800 |      | Bacillariophyta: Coscinodiscophyceae | Langdon 1987                               | 1.410                                                           | C/cell=14 pg<br>C/N=7.5<br>C/Chl a=18.9                                 | 7.5 |

|                                |     |     |                                                                                           |      |      |    |         |         |                                         |                                                 |                                                                         |                                                                                                                                |     |
|--------------------------------|-----|-----|-------------------------------------------------------------------------------------------|------|------|----|---------|---------|-----------------------------------------|-------------------------------------------------|-------------------------------------------------------------------------|--------------------------------------------------------------------------------------------------------------------------------|-----|
| 155. Skeletonema costatum      | Chl |     | $\mu\text{mol O}_2 (\text{mg Chl})^{-1} \text{ hr}^{-1}$                                  | 27.5 | 15.4 | 15 | 30.800  |         | Bacillariophyta:<br>Coccinodiscophyceae | Smith et al. 1992                               |                                                                         |                                                                                                                                |     |
| 156. Skeletonema costatum      | C   |     | $10^{-3} \mu\text{mol O}_2 (\mu\text{g C})^{-1} \text{ hr}^{-1}$                          | 0.83 | 15.5 | 15 | 31.000  |         | Bacillariophyta:<br>Coccinodiscophyceae | Langdon 1987                                    | 2.410                                                                   | C/cell=31 pg<br>C/N=8.1                                                                                                        | 8.4 |
| 157. Skeletonema costatum      | C   |     | $10^{-3} \mu\text{mol O}_2 (\mu\text{g C})^{-1} \text{ hr}^{-1}$                          | 0.84 | 15.7 | 15 | 31.400  |         | Bacillariophyta:<br>Coccinodiscophyceae | Langdon 1987                                    | 1.240                                                                   | C/cell=16 pg<br>C/N=6.4<br>C/Chl a=29.4                                                                                        | 6.7 |
| 158. Skeletonema costatum      | C   |     | $\mu\text{mol O}_2 \text{ cell}^{-1} \text{ min}^{-1} \times 10^{10}$ at 14 pg C per cell | 2.3  | 16   | 15 | 32.000  | 91      | Bacillariophyta:<br>Coccinodiscophyceae | Falkowski & Owens 1980                          | 0.95; Log                                                               | C/V=0.154 $\text{pg}/\mu\text{m}^3$<br>C/N=5.6                                                                                 | 6.9 |
| 159. Skeletonema costatum      | C   |     | $\mu\text{mol O}_2 \text{ cell}^{-1} \text{ min}^{-1} \times 10^{10}$ at 16 pg C per cell | 2.3  | 16   | 15 | 32.000  | 88      | Bacillariophyta:<br>Coccinodiscophyceae | Falkowski & Owens 1980                          | 0.77; Log                                                               | C/V=0.182 $\text{pg}/\mu\text{m}^3$<br>C/N=3.7                                                                                 | 4.0 |
| 160. Skeletonema costatum      | Chl |     | $\mu\text{mol O}_2 (\text{mg Chl})^{-1} \text{ hr}^{-1}$                                  | 28   | 16   | 15 | 32.000  |         | Bacillariophyta:<br>Coccinodiscophyceae | Smith et al. 1992                               |                                                                         |                                                                                                                                |     |
| 161. Skeletonema costatum      | C   |     | $10^{-3} \mu\text{mol O}_2 (\mu\text{g C})^{-1} \text{ hr}^{-1}$                          | 0.90 | 16.8 | 15 | 33.600  | 124     | Bacillariophyta:<br>Coccinodiscophyceae | Langdon 1987                                    | 1.880                                                                   | C/cell=16 pg<br>C/V=0.129 $\text{pg}/\mu\text{m}^3$<br>C/N=6.4<br>C/Chl a=51.3                                                 | 7.2 |
| 162. Skeletonema costatum      | C   |     | $\mu\text{mol O}_2 \text{ cell}^{-1} \text{ min}^{-1} \times 10^{10}$ at 15 pg C per cell | 2.2  | 18   | 15 | 36.000  | 92      | Bacillariophyta:<br>Coccinodiscophyceae | Falkowski & Owens 1980                          | 0.88; Log                                                               | C/V=0.163 $\text{pg}/\mu\text{m}^3$<br>C/N=5.0                                                                                 | 6.1 |
| 163. Skeletonema costatum      | C   |     | $10^{-3} \mu\text{mol O}_2 (\mu\text{g C})^{-1} \text{ hr}^{-1}$                          | 1.05 | 19.6 | 15 | 39.200  |         | Bacillariophyta:<br>Coccinodiscophyceae | Langdon 1987                                    | 2.340                                                                   | C/cell=18 pg<br>C/Chl a=54.4                                                                                                   |     |
| 164. Skeletonema costatum      | C   |     | $10^{-3} \mu\text{mol O}_2 (\mu\text{g C})^{-1} \text{ hr}^{-1}$                          | 1.20 | 22.4 | 15 | 44.800  | 124     | Bacillariophyta:<br>Coccinodiscophyceae | Langdon 1987                                    | 1.930                                                                   | C/cell=22 pg<br>C/V=0.177 $\text{pg}/\mu\text{m}^3$<br>C/N=8.2                                                                 | 12  |
| 165. Skeletonema costatum      | C   |     | $10^{-3} \mu\text{mol O}_2 (\mu\text{g C})^{-1} \text{ hr}^{-1}$                          | 1.20 | 22.4 | 15 | 44.800  |         | Bacillariophyta:<br>Coccinodiscophyceae | Langdon 1987                                    | 2.370                                                                   | C/Chl a=29.0<br>C/cell=29 pg<br>C/N=9.0<br>C/Chl a=38.7                                                                        | 13  |
| 166. Skeletonema costatum      | Chl |     | $\mu\text{mol O}_2 (\text{mg Chl})^{-1} \text{ hr}^{-1}$                                  | 62.6 | 35   | 15 | 70.000  |         | Bacillariophyta:<br>Coccinodiscophyceae | Smith et al. 1992                               |                                                                         |                                                                                                                                |     |
| 167. Skeletonema costatum      | Chl |     | $\mu\text{mol O}_2 (\text{mg Chl})^{-1} \text{ hr}^{-1}$                                  | 96   | 54   | 15 | 108.000 |         | Bacillariophyta:<br>Coccinodiscophyceae | Smith et al. 1992                               |                                                                         |                                                                                                                                |     |
| 168. Stephanodiscus neoastraea | C   | MIN | $\text{mg O}_2 (\text{mg Chl a})^{-1} \text{ hr}^{-1}$ at Chl a/C = 0.052                 | 0.3  | 8.4  | 20 | 11.879  | [14000] | Bacillariophyta:<br>Coccinodiscophyceae | Fietz & Nicklisch 2002<br>[Olenina et al. 2006] |                                                                         | Silicates/DM=38%<br>ODM/V=0.27<br>C/N=4.6<br>C/ODM=0.46<br>Chl a/ODM=0.024                                                     | 2.8 |
| 169. Strombidium capitatum     | C   | MIN | $\text{nl O}_2 \text{ cell}^{-1} \text{ hr}^{-1}$ at $2.8 \times 10^3$ pg C per cell      | 0.67 | 19   | 15 | 38.000  | 200000  | Ologotrichia (ciliate)                  | Crawford & Stoecker 1996, Fig. 3                | largest cells, little mortality during 24 hr starvation, active swimmer | The C/V ratio applied by the authors was 0.14 $\text{pg}/\mu\text{m}^3$ based on the data of Putt & Stoecker 1989 for ciliates |     |

|                                                                 |     |     |                                                            |          |     |     |        |       |                                      |                                                                                                                                       |      |                                                    |     |
|-----------------------------------------------------------------|-----|-----|------------------------------------------------------------|----------|-----|-----|--------|-------|--------------------------------------|---------------------------------------------------------------------------------------------------------------------------------------|------|----------------------------------------------------|-----|
| 170. Symbiodinium sp. (zooxanthellae from Aiptasia pallida)     | Chl | MIN | $\mu\text{g O}_2 (\mu\text{g Chl})^{-1} \text{ hr}^{-1}$   | 0.86     | 15  | 25  | 15.000 | [500] | Myzozoa: Dinophyceae                 | Goulet et al. 2005 [calculated from mean Chl a content]                                                                               |      | Chl a/cell=1.9 pg                                  |     |
| 171. Symbiodinium sp. (zooxanthellae from Aiptasia pallida)     | Chl |     | $\mu\text{g O}_2 (\mu\text{g Chl})^{-1} \text{ hr}^{-1}$   | 1.24     | 22  | 25  | 22.000 | [500] | Myzozoa: Dinophyceae                 | Goulet et al. 2005 [calculated from mean Chl a content]                                                                               |      | Chl a/cell=2.8 pg                                  |     |
| 172. Symbiodinium sp. (zooxanthellae from Aiptasia pallida)     | Chl |     | $\mu\text{g O}_2 (\mu\text{g Chl})^{-1} \text{ hr}^{-1}$   | 2.33     | 41  | 32  | 25.238 | [500] | Myzozoa: Dinophyceae                 | Goulet et al. 2005 [calculated from mean Chl a content]                                                                               |      | Chl a/cell=2.8 pg                                  |     |
| 173. Symbiodinium sp. (zooxanthellae from Aiptasia pallida)     | Chl |     | $\mu\text{g O}_2 (\mu\text{g Chl})^{-1} \text{ hr}^{-1}$   | 4.26     | 77  | 32  | 47.399 | [500] | Myzozoa: Dinophyceae                 | Goulet et al. 2005 [calculated from mean Chl a content]                                                                               |      | Chl a/cell=1.9 pg                                  |     |
| 174. Symbiodinium sp. (zooxanthellae from Aiptasia pallida)     | Chl |     | $\mu\text{g O}_2 (\mu\text{g Chl})^{-1} \text{ hr}^{-1}$   | 6.26     | 109 | 34  | 58.412 | [500] | Myzozoa: Dinophyceae                 | Goulet et al. 2005 [calculated from mean Chl a content]                                                                               |      | Chl a/cell=2.8 pg                                  |     |
| 175. Symbiodinium sp. (zooxanthellae from Aiptasia pallida)     | Chl |     | $\mu\text{g O}_2 (\mu\text{g Chl})^{-1} \text{ hr}^{-1}$   | 6.26     | 109 | 34  | 58.412 | [500] | Myzozoa: Dinophyceae                 | Goulet et al. 2005 [calculated from mean Chl a content]                                                                               |      | Chl a/cell=1.9 pg                                  |     |
| 176. Symbiodinium sp. (zooxanthellae from Pocillopora capitata) | Chl | MIN | $\mu\text{mol O}_2 (\text{mg Chl a})^{-1} \text{ hr}^{-1}$ | 16.5/2.4 | 4   | 24  | 4.287  |       | Myzozoa: Dinophyceae                 | Burris 1977                                                                                                                           |      |                                                    |     |
| 177. Terpsinoe musica                                           | D   | MIN | $\text{mg O}_2 (\text{g DM})^{-1} \text{ hr}^{-1}$         | 2.5      | 2.9 | 25  | 2.900  |       | Bacillariophyta: Coscinodiscophyceae | Necchi 2004                                                                                                                           |      |                                                    |     |
| 178. Thalassiosira allenii                                      | C   | MIN | $\text{g C (g cell C)}^{-1} \text{ day}^{-1}$              | 0.04     | 2.6 | 20  | 3.677  | [300] | Bacillariophyta: Coscinodiscophyceae | Geider & Osborne 1989 (data of Laws & Wong 1978) [Cózar & Echevarría 2005, Table 1]                                                   |      |                                                    |     |
| 179. Thalassiosira nordenskiöldii                               | C   | MIN | $\text{g C (g cell C)}^{-1} \text{ hr}^{-1}$               | 0.0013   | 2   | 0.5 | 10.928 | [500] | Bacillariophyta: Coscinodiscophyceae | Sakshaug et al. 1991 [calculated from C content using the formula of Verity 1981 for the similar-sized diatom Leptocylindrus danicus] | 0.12 | N/cell=9.0 pg<br>C/cell=48 pg<br>Chl a/cell=3.1 pg | 0.7 |
| 180. Thalassiosira nordenskiöldii                               | C   |     | $\text{g C (g cell C)}^{-1} \text{ hr}^{-1}$               | 0.0015   | 2.3 | 0.5 | 12.568 | [470] | Bacillariophyta: Coscinodiscophyceae | Sakshaug et al. 1991 [calculated from C content using the formula of Verity 1981 for the similar-sized diatom Leptocylindrus danicus] | 0.33 | N/cell=9.1 pg<br>C/cell=46 pg<br>Chl a/cell=1.9 pg | 0.7 |
| 181. Thalassiosira nordenskiöldii                               | C   |     | $\text{g C (g cell C)}^{-1} \text{ hr}^{-1}$               | 0.0024   | 3.7 | 0.5 | 20.217 | [430] | Bacillariophyta: Coscinodiscophyceae | Sakshaug et al. 1991 [calculated from C content using the formula of Verity 1981 for the similar-sized diatom Leptocylindrus danicus] | 0.10 | N/cell=7.8 pg<br>C/cell=43 pg<br>Chl a/cell=2.7 pg | 1.4 |

|                                                                        |     |     |                                                                                                  |          |      |     |        |        |                                         |                                                                                                                                               |                                                                    |                                                                         |     |
|------------------------------------------------------------------------|-----|-----|--------------------------------------------------------------------------------------------------|----------|------|-----|--------|--------|-----------------------------------------|-----------------------------------------------------------------------------------------------------------------------------------------------|--------------------------------------------------------------------|-------------------------------------------------------------------------|-----|
| 182. <i>Thalassiosira nordenskiöldii</i>                               | C   |     | g C (g cell C) <sup>-1</sup> hr <sup>-1</sup>                                                    | 0.0029   | 4.5  | 0.5 | 24.589 | [830]  | Bacillariophyta:<br>Coccinodiscophyceae | Sakshaug et al. 1991 [calculated from C content using the formula of Verity 1981 for the similar-sized diatom <i>Leptocylindrus danicus</i> ] | 0.33                                                               | N/cell=13 pg<br>C/cell=69 pg<br>Chl a/cell=1.2 pg                       | 1.6 |
| 183. <i>Thalassiosira pseudonana</i>                                   | Chl | MIN | μmol O <sub>2</sub> (mg Chl a) <sup>-1</sup> hr <sup>-1</sup>                                    | 74.6/8.3 | 5    | 24  | 5.359  |        | Bacillariophyta:<br>Coccinodiscophyceae | Burris 1977                                                                                                                                   | late exp/<br>early stat                                            |                                                                         |     |
| 184. <i>Thalassiosira pseudonana</i>                                   | C   |     | g C (g cell C) <sup>-1</sup> hr <sup>-1</sup>                                                    | 0.0080   | 12.4 | 18  | 20.144 | 77     | Bacillariophyta:<br>Coccinodiscophyceae | Blasco et al. 1982                                                                                                                            | 1.92; Log                                                          | C/V=0.142 pg/μm <sup>3</sup><br>C/N=7.9<br>Chl a/C=1.33%                | 6.5 |
| 185. <i>Thalassiosira weissflogii</i>                                  | C   | MIN | μmol O <sub>2</sub> cell <sup>-1</sup> min <sup>-1</sup> × 10 <sup>10</sup> at 275 pg C per cell | 20       | 8.1  | 18  | 13.158 | 1172   | Bacillariophyta:<br>Coccinodiscophyceae | Falkowski et al. 1985                                                                                                                         | 0.25 (30 μmol m <sup>-2</sup> s <sup>-1</sup> );<br>steady growth  | C/cell=275 pg<br>C/V=0.235 pg/μm <sup>3</sup><br>C/N=6.3<br>Chl/C=5.00% | 3.4 |
| 186. <i>Thalassiosira weissflogii</i>                                  | C   |     | g C (g cell C) <sup>-1</sup> hr <sup>-1</sup>                                                    | 0.0097   | 15.1 | 18  | 24.530 | 529    | Bacillariophyta:<br>Coccinodiscophyceae | Blasco et al. 1982                                                                                                                            | 1.25; Log                                                          | C/V=0.331 pg/μm <sup>3</sup><br>C/N=8.3<br>Chl a/C=1.43%                | 8.4 |
| 187. <i>Thalassiosira weissflogii</i>                                  | C   |     | μmol O <sub>2</sub> cell <sup>-1</sup> min <sup>-1</sup> × 10 <sup>10</sup> at 277 pg C per cell | 47       | 19   | 18  | 30.866 | 1460   | Bacillariophyta:<br>Coccinodiscophyceae | Falkowski et al. 1985                                                                                                                         | 0.62 (70 μmol m <sup>-2</sup> s <sup>-1</sup> );<br>steady growth  | C/cell=277 pg<br>C/V=0.190 pg/μm <sup>3</sup><br>C/N=6.6<br>Chl/C=4.27% | 8.4 |
| 188. <i>Thalassiosira weissflogii</i>                                  | C   |     | μmol O <sub>2</sub> cell <sup>-1</sup> min <sup>-1</sup> × 10 <sup>10</sup> at 328 pg C per cell | 75       | 26   | 18  | 42.237 | 1364   | Bacillariophyta:<br>Coccinodiscophyceae | Falkowski et al. 1985                                                                                                                         | 1.73 (320 μmol m <sup>-2</sup> s <sup>-1</sup> );<br>steady growth | C/cell=328 pg<br>C/V=0.240 pg/μm <sup>3</sup><br>C/N=8.3<br>Chl/C=2.11% | 14  |
| 189. <i>Thalassiosira weissflogii</i>                                  | C   |     | μmol O <sub>2</sub> cell <sup>-1</sup> min <sup>-1</sup> × 10 <sup>10</sup> at 291 pg C per cell | 72       | 28   | 18  | 45.486 | 1675   | Bacillariophyta:<br>Coccinodiscophyceae | Falkowski et al. 1985                                                                                                                         | 1.15 (150 μmol m <sup>-2</sup> s <sup>-1</sup> );<br>steady growth | C/cell=291 pg<br>C/V=0.174 pg/μm <sup>3</sup><br>C/N=6.5<br>Chl/C=3.46% | 12  |
| 190. <i>Thalassiosira weissflogii</i>                                  | C   |     | μmol O <sub>2</sub> cell <sup>-1</sup> min <sup>-1</sup> × 10 <sup>10</sup> at 326 pg C per cell | 82       | 28   | 18  | 45.486 | 1480   | Bacillariophyta:<br>Coccinodiscophyceae | Falkowski et al. 1985                                                                                                                         | 1.80 (600 μmol m <sup>-2</sup> s <sup>-1</sup> );<br>steady growth | C/cell=326 pg<br>C/V=0.220 pg/μm <sup>3</sup><br>C/N=8.1<br>Chl/C=1.55% | 15  |
| 191. <i>Trebouxia</i> sp. (phycobiont of <i>Caloplaca holocarpa</i> )  | D   | MIN | μl O <sub>2</sub> (mg DM) <sup>-1</sup> hr <sup>-1</sup>                                         | 0.77     | 1.4  | 20  | 1.980  | [1000] | Chlorophyta:<br>Trebouxiophyceae        | Showman 1972 [Hirose & Yamagishi 1977, genus, diam 10-15 μm]                                                                                  | overnight incubation in darkness                                   | Chl a/WM=0.000625                                                       |     |
| 192. <i>Trebouxia</i> sp. (phycobiont of <i>Cladonia cristatella</i> ) | D   | MIN | μl O <sub>2</sub> (mg DM) <sup>-1</sup> hr <sup>-1</sup>                                         | 1.49     | 2.6  | 20  | 3.677  | [1000] | Chlorophyta:<br>Trebouxiophyceae        | Showman 1972 [Hirose & Yamagishi 1977, genus, diam 10-15 μm]                                                                                  | overnight incubation in darkness                                   | Chl a/WM=0.000358                                                       |     |



|                                                                        |   |     |                                                          |      |     |    |       |        |                                  |                                                                                   |                                           |                   |
|------------------------------------------------------------------------|---|-----|----------------------------------------------------------|------|-----|----|-------|--------|----------------------------------|-----------------------------------------------------------------------------------|-------------------------------------------|-------------------|
| 193. <i>Trebouxia</i> sp.<br>(phycobiont of <i>Lecanora dispersa</i> ) | D | MIN | $\mu\text{l O}_2$ (mg DM) <sup>-1</sup> hr <sup>-1</sup> | 0.96 | 1.7 | 20 | 2.404 | [1000] | Chlorophyta:<br>Trebouxiophyceae | Showman 1972<br>[Hirose & Yamagishi<br>1977, genus, diam<br>10-15 $\mu\text{m}$ ] | overnight<br>incubation<br>in<br>darkness | Chl a/WM=0.000354 |
|------------------------------------------------------------------------|---|-----|----------------------------------------------------------|------|-----|----|-------|--------|----------------------------------|-----------------------------------------------------------------------------------|-------------------------------------------|-------------------|

## References to Table S8

- APHA (American Public Health Association, American Water Works Association and Water Pollution Control Federation) (1992) Standard Methods for the Examination of Water and Wastewater. 18th ed. Washington D.C.
- Berman-Frank I., Erezl J. (1996) Inorganic carbon pools in the bloom-forming dinoflagellate *Peridinium gatunense*. *Limnology and Oceanography* 41: 1780-1789.
- Blasco D., Packard T.T., Garfield P.C. (1982) Size-dependence of growth rate, respiratory electron transport system activity and chemical composition in marine diatoms in the laboratory. *Journal of Phycology* 18: 58-63.
- Bratbak G., Dundas I. (1984) Bacterial dry matter content and biomass estimations. *Applied and Environmental Microbiology* 48: 755-757.
- Choo K.-s., Snoeijs P., Pedersén M. (2002) Uptake of inorganic carbon by *Cladophora glomerata* (Chlorophyta) from the Baltic Sea. *Journal of Phycology* 38: 493-502.
- Cook J.R. (1966) Adaptations to temperature in two closely related strains of *Euglena gracilis*. *Biological Bulletin* 131: 83-93.
- Coombs J., Darley W.M., Holm-Hansen O., Volcani B.E. (1967a) Studies on the biochemistry and fine structure of silica shell formation in diatoms. Chemical composition of *Navicula pelliculosa* during silicon-starvation synchrony. *Plant Physiology* 42: 1601-1606.
- Coombs J., Spanis C., Volcani B.E. (1967b) Studies on the biochemistry and fine structure of silica shell formation in diatoms. Photosynthesis and respiration in silicon-starvation synchrony of *Navicula pelliculosa*. *Plant Physiology* 42: 1607-1611.
- Cózar A., Echevarría F. (2005) Size structure of the planktonic community in microcosms with different levels of turbulence. *Scientia Marina* 69: 187-197.
- Crawford D.W., Stoecker D.K. (1996) Carbon content, dark respiration and mortality of the mixotrophic planktonic ciliate *Strombidium capitatum*. *Marine Biology* 126: 415-422.
- Davey M.C. (1989) The effects of freezing and desiccation on photosynthesis and survival of terrestrial Antarctic algae and cyanobacteria. *Polar Biology* 10: 29-36.
- Falkowski P.G., Dubinsky Z., Wyman K. (1985) Growth-irradiance relationships in phytoplankton. *Limnology and Oceanography* 30: 311-321.
- Falkowski P.G., Owens T.G. (1980) Light-shade adaptation. Two strategies in marine phytoplankton. *Plant Physiology* 66: 592-595.
- Fenchel T.B., Finlay J. (1983) Respiration rates in heterotrophic, free-living protozoa. *Microbial Ecology* 9: 99-122.
- Fietz S., Nicklisch A. (2002) Acclimation of the diatom *Stephanodiscus neoastraea* and the cyanobacterium *Planktothrix agardhii* to simulated natural light fluctuations. *Photosynthesis Research* 72: 95-106.
- Flameling I.A., Kromkamp J. (1998) Light dependence of quantum yields for PSII charge separation and oxygen evolution in eucaryotic algae. *Limnology and Oceanography* 43: 284-297.
- Geider R.J., Osborne B.A. (1989) Respiration and microalgal growth: a review of the quantitative relationship between dark respiration and growth. *New Phytologist* 112: 327-394.

- Gest H., Kamen M.D. (1948) Studies on the phosphorus metabolism of green algae and purple bacteria in relation to photosynthesis. *Journal of Biological Chemistry* 176: 299-318.
- Gilstad M., Johnsen G., Sakshaug E. (1993) Photosynthetic parameters, pigment composition and respiration rates of the marine diatom *Skeletonema costatum* grown in continuous light and a 12:12 h light-dark cycle. *Journal of Plankton Research* 15: 939-951.
- Glover H.E., Keller M.D., Spinrad R.W. (1987) The effects of light quality and intensity on photosynthesis and growth of marine eucaryotic and procaryotic phytoplankton clones. *Journal of Experimental Marine Biology and Ecology* 105: 137-159.
- Goulet T.L., Cook C.B., Goulet D. (2005) Effect of short-term exposure to elevated temperatures and light levels on photosynthesis of different host-symbiont combinations in the *Aiptasia pallida/Symbiodinium* symbiosis. *Limnology and Oceanography* 50: 1490-1498.
- Graham M.T., Kranzfelder J.A., Auer M.T. (1985) Light and temperature as factors regulating seasonal growth and distribution of *Ulothrix zonata* (*Ulvophyceae*). *Journal of Phycology* 21: 228-234.
- Graham M.T., Graham L.E. (1987) Growth and reproduction of *Bangia atropurpurea* (Roth) C. Ag. (Rhodophyta) from the Laurentian Great Lakes. *Aquatic Botany* 28: 317-331.
- Greene R.M., Geider R.J., Falkowski P.G. (1991) Effect of iron limitation on photosynthesis in a marine diatom. *Limnology and Oceanography* 36: 1772-1782.
- Hall J.A., Golding L.A. (1998) Standard methods for whole effluent toxicity testing: development and application. Report no. MFE80205. NIWA report for the Ministry for the Environment, Wellington, New Zealand. Appendix 4. Freshwater algae (*Selenastrum tricornutum*).
- Hammouda O.H.E., El-Sheekh M.M. (1994) Response of fresh water phytoplanktonic algae *Chlorella kessleri* and *Synechocystis* PCC 6803 to anthelmintic activity of the wild Egyptian plant *Calendula micrantha officinalis*. *Archives of Environmental Contamination and Toxicology* 27: 406-409.
- Healey F.P. (1979) Short-term responses of nutrient-deficient algae to nutrient addition. *Journal of Phycology* 15: 289-299.
- Herzig R., Falkowski P.G. (1989) Nitrogen limitation in *Isochrysis galbana* (Haptophyceae). 1. Photosynthetic energy conversion and growth efficiencies. *Journal of Phycology* 25: 462-471.
- Hirose H., Yamagishi T. (eds.) (1977) *Illustrations of the Japanese Freshwater Algae*. Uchidarokakuho-shinsha, Tokyo. <http://protist.i.hosei.ac.jp>
- Hochachka P.W., Teal J.M. (1964) Respiratory metabolism in a marine dinoflagellate. *Biological Bulletin* 126: 274-281.
- Johnson M., Shivkumar S., Berlowitz-Tarrant L. (1996) Structure and properties of filamentous green algae. *Materials science and engineering B, Solid-state materials for advanced technology* 38: 103-108.
- Kishler J., Taft C.E. (1970) *Bangia atropurpurea* (Roth) A. in Western Lake Erie. *The Ohio Journal of Science* 70: 56-57.
- Kratz W.A., Myers J. (1955) Photosynthesis and respiration of three blue-green algae. *Plant Physiology* 30: 275-280.
- Krienitz L., Hegewald E.H., Hepperle D., Huss V.A.R., Rohr T., Wolf M. (2004) Phylogenetic relationship of *Chlorella* and *Parachlorella* gen. nov. (Chlorophyta, Trebouxiophyceae). *Phycologia* 43: 529-542.
- Langdon C. (1987) On the causes of interspecific differences in the growth-irradiance relationship for phytoplankton. Part I. A comparative study of the growth-irradiance relationship of three marine phytoplankton species: *Skeletonema costatum*, *Olisthodiscus luteus* and *Gonyaulax tamarensis*. *Journal of Plankton Research* 9: 459-482.

- Laws E.A, Wong C.L. (1978) Studies of carbon and nitrogen metabolism by three marine phytoplankton species in nitrate-limited continuous culture. *Journal of Phycology* 14: 406-416.
- Laws E.A., Caperon J. (1976) Carbon and nitrogen metabolism by *Monochrysis lutheri*: measurement of growth rate dependent respiration rates. *Marine Biology* 36: 85-97.
- Lee K., Lee C.-G. (2001) Effect of light/dark cycles on wastewater treatments by microalgae. *Biotechnology and Bioprocess Engineering* 6: 194-199.
- Liska A.J., Shevchenko A., Pick U., Katz A. (2004) Enhanced photosynthesis and redox energy production contribute to salinity tolerance in *Dunaliella* as revealed by homology-based proteomics. *Plant Physiology* 136: 2806-2817.
- Margalef R. (1954) Modifications induced by different temperatures on the cells of *Scenedesmus obliquus* (Chlorophyceae). *Hydrobiologia* 6: 83-94.
- Mironyuk V.I., Einor L.O. (1968) Oxygen metabolism and pigment content in different forms of *Dunaliella salina* Teod. at increased NaCl concentration. *Gidrobiologicheskii Zhurnal Hydrobiological Journal* 4: 23-29.
- Myers J., Graham J.-R. (1971) The photosynthetic unit in *Chlorella* measured by repetitive short flashes. *Plant Physiology* 48: 282-286.
- Necchi O. (2004) Photosynthetic responses to temperature in tropical lotic macroalgae. *Phycological Research* 52: 140-148.
- Nielsen M.V. (1997) Growth, dark respiration and photosynthetic parameters of the coccolithophorid *Emiliania huxleyi* (Prymnesiophyceae) acclimated to different length-irradiance combinations. *Journal of Phycology* 33: 818-822.
- Olenina I., Hajdu S., Edler L., Andersson A., Wasmund N., Busch S., Göbel J., Gromisz S., Huseby S., Huttunen M., Jaanus A., Kokkonen P., Ledaine I., Niemkiewicz E. (2006) Biovolumes and size-classes of phytoplankton in the Baltic Sea. Helsinki Commission, Baltic Marine Environment Protection Commission, Baltic Sea Environment Proceedings No. 106, 144 pp.
- Otte S., Kuenen J.G., Nielsen L.P., Paerl H.W., Zopfi J., Schulz H.N., Teske A., Strotmann B., Gallardo V.A., Jørgensen B.B. (1999) Nitrogen, carbon, and sulfur metabolism in natural *Thioploca* samples. *Applied and Environmental Microbiology* 65: 3148-3157.
- Parker R.D.R., Drown D.B. (1982) Effects of phosphorus enrichment and wave simulation on populations of *Ulothrix zonata* from Northern Lake Superior. *Journal of Great Lakes Research* 8: 16-26.
- Pickett J.M. (1975) Growth of *Chlorella* in a nitrate-limited chemostat. *Plant Physiology* 55: 223-225.
- Polle J.E.W., Niyogi K.K., Melis A. (2001) Absence of lutein, violaxanthin and neoxanthin affects the functional chlorophyll antenna size of photosystem-II but not that of photosystem-I in the green alga *Chlamydomonas reinhardtii*. *Plant and Cell Physiology* 42: 482-491.
- Coleman J.R., Colman B. (1980) Effect of oxygen and temperature on the efficiency of photosynthetic carbon assimilation in two microscopic algae. *Plant Physiology* 65: 980-983.
- Putt M., Stoecker D.K. (1989) An experimentally determined carbon:volume ratio for marine "oligotrichous" ciliates from estuarine and coastal waters. *Limnology and Oceanography* 34:1097-1103.
- Quigg A., Beardall J. (2003) Protein turnover in relation to maintenance metabolism at low photon flux in two marine microalgae. *Plant, Cell and Environment* 26: 693-703.
- Rajagopal P.K. (1962) Respiration of some marine planktonic organisms. *Proceedings of the Indian Academy of Sciences* 55B: 76-81.
- Sakshaug E., Johnsen G., Andresen K., Vernet M. (1991) Modeling of light-dependent algal photosynthesis and growth: Experiments with the Barents Sea diatoms *Thalassiosira nordenskioeldii* and *Chaetoceros furcellatus*. *Deep-Sea Research* 38: 415-430.

- Showman R.E. (1972) Photosynthetic response with respect to light in three strains of lichen algae. *Ohio Journal of Science* 72: 114-117.
- Skinner S., Entwisle T.J. (2004). Non-marine algae of Australia: 6. Cladophoraceae (Chlorophyta). *Telopea* 10: 731-748.
- Smith G.J., Zimmerman R.C., Alberte R.S. (1993) Molecular and physiological responses of diatoms to variable levels of irradiance and nitrogen availability: Growth of *Skeletonema costatum* in simulated upwelling conditions. *Limnology and Oceanography* 37: 989-1007.
- Sobrino C., Montero O., Lubián L.M. (2005) Effect of UV-A and UV-B on the diel patterns of growth and metabolic activity in *Nannochloris atomus* cultures assessed by flow cytometry. *Marine Ecology Progress Series* 293: 29-35.
- Spencer D.F., Lembi C.A., Graham J.M. (1985) Influence of light and temperature on photosynthesis and respiration by *Pithophora oedogonia* (Mont.) Wittr. (Chlorophyceae). *Aquatic Botany* 23: 109-118.
- Stal L.J., Moezelaar R. (1997) Fermentation in cyanobacteria. *FEMS Microbiology Reviews* 21: 179-211.
- Sukenik A., Eshkol R., Livne A., Hadas O., Rom M., Tchernov D., Vardi A., Kaplan A. (2002) Inhibition of growth and photosynthesis of the dinoflagellate *Peridinium gatunense* by *Microcystis* sp. (cyanobacteria): A novel allelopathic mechanism. *Limnology and Oceanography* 47: 1656-1663.
- Sweeney B.M. (1986) The loss of the circadian rhythm in photosynthesis in an old strain of *Gonyaulax polyedra*. *Plant Physiology* 80: 978-981.
- Talling J.F. (1957) Photosynthetic characteristics of some freshwater plankton diatoms in relation to underwater radiation. *New Phytologist* 56: 29-50.
- Theodorou M.E., Elrifi I.R., Turpin D.H., Plaxton W.C. (1991) Effects of phosphorus limitation on respiratory metabolism in the green alga *Selenastrum minutum*. *Plant Physiology* 95: 1089-1095.
- Verity P.G. (1981) Effects of temperature, irradiance, and daylength on the marine diatom *Leptocylindrus danicus* Cleve. I. Photosynthesis and cellular composition. *Journal of Experimental Marine Biology and Ecology* 55, 79-91.
- Verity P.G. (1982a) Effects of temperature, irradiance and daylength on the marine diatom *Leptocylindrus danicus* Cleve. III. Dark respiration. *Journal of Experimental Marine Biology and Ecology* 60, 197-207.
- Verity P.G. (1982b) Effects of temperature, irradiance, and day-length on the marine diatom *Leptocylindrus danicus* Cleve. IV. Growth. *Journal of Experimental Marine Biology and Ecology* 60, 209-222
- Verity P.G., Robertson C.Y., Tronzo C.R., Andrews M.G., Nelson J.R., Sieracki M.E. (1992) Relationships between cell volume and the carbon and nitrogen content of marine photosynthetic nanoplankton. *Limnology and Oceanography* 37: 1434-1446.
- Vladimirova I.G., Zotin A.I. (1983) Respiration rates of Protozoa. Manuscript No. 5500-B3 12.08.1983 deposited in the All-Russian Institute of Scientific and Technical Information (VINITI), 62 pp.
- Vladimirova I.G., Zotin A.I. (1985) Dependence of metabolic rate in Protozoa on body temperature and weight. *Zhurnal Obschei Biologii Journal of General Biology* 46: 165-173.
- Weis D., Brown A.H. (1959) Kinetic relationships between photosynthesis and respiration in the algal flagellate, *Ochromonas malhamensis*. *Plant Physiology* 34: 235-239.
- Zubkov M.V. Fuchs B.M., Eilers H., Burkill P.H., Amann R. (1999) Determination of total protein content of bacterial cells by SYPRO staining and flow cytometry. *Applied and Environmental Microbiology* 65: 3251-3257.
