# Supplementary material
Source: PubMed Central journal article supplement (PMC2579366)
Supplement: 0802148105_DS9_PDF.pdf [file 0802148105_DS9_PDF.pdf]

## Dataset S9. Dark respiration rates in eukaryotic macroalgae

### Notes to Table S9:

Data on dark respiration rates in eukaryotic macroalgae (including uniseriate filaments) are presented. Taxonomic status (the “**Phylum: Class**” column) was determined for each genus following [www.algaebase.org](http://www.algaebase.org).

Abbreviations and universal conversions: DM – dry mass; WM – wet mass; N – nitrogen mass; Chl a – Chl a mass; C – carbon mass; Pr – protein mass; X/Y – X by Y mass ratio in the cell, e.g. DM/WM is the ratio of dry to wet cell mass;  $1 \text{ W} = 1 \text{ J s}^{-1}$ ;  $1 \text{ mol O}_2 = 32 \text{ g O}_2$ .

“**Original units**” are the units of dark respiration rate measurements as given in the original publication (“**Source**”); **qou** is the numeric value of dark respiration rate in the original units. E.g., if it is “ $\text{mg O}_2 (\text{g DM})^{-1} \text{ hr}^{-1}$ ” in the column “**Original units**” and “1.1” in the column “**qou**”, this means that dark respiration rate of the corresponding species, as given in the original publication indicated in the column “**Source**”, is  $1.1 \text{ mg O}_2 (\text{g DM})^{-1} \text{ hr}^{-1}$ .

Column “**U**” (mass units of respiration rate measurements): D – dry mass or wet mass with known DM/WM ratio; W – wet mass without information on DM/WM ratio; Chl – chlorophyll mass.

**qWkg** is dark respiration rate converted to W ( $\text{kg WM}^{-1}$ ) (Watts per kg wet mass) using the following conversion factors. If the DM/WM (dry mass to wet mass) ratio is unknown, while **qou** is reported per unit dry mass, the ratio  $\text{DM/WM} = 0.3$  was used, as a crude mean for all taxa applied in the analysis (SI Methods, Table S12a). If the DM/WM ratio is known, while **qou** is reported per unit wet mass, the dark respiration rate is first calculated per unit dry mass and then converted to **qWkg** using the reference  $\text{DM/WM} = 0.3$ . This procedure was applied to make DM- and WM-based data comparable whenever possible. The respiratory quotient of unity was used (1 mol  $\text{CO}_2$  released per 1 mol  $\text{O}_2$  consumed). Energy conversion:  $1 \text{ mol O}_2 = 20 \text{ J}$ . In four cases **qou** was reported per unit chlorophyll a mass. In these cases mass ratio  $\text{Chl a/DM} = 0.003$  was adopted to express dark respiration rate per unit dry mass, which was then converted to **qWkg** at  $\text{DM/WM} = 0.3$ . The ratio  $\text{Chl a/DM} = 0.003$  was used as the mean for the studied species with known  $\text{Chl a/DM}$  ratio (range 0.00016-0.012,  $N = 42$ , Table S9). If **qou** was reported per unit wet mass with no information on the DM/WM ratio available, **qWkg** was obtained from **qou** without mass unit conversions applied.

**TC** is ambient temperature during measurements, degrees Celsius.

**q25Wkg, temperature conversions:** Regression of  $\log_{10} \text{qWkg}$  on TC for DM-based measurements ( $N = 77$ ) yielded the following results,  $\log_{10} \text{qWkg} = a + b \text{ TC}$ , where  $a = 0.20 \pm 0.06$  ( $\pm 1 \text{ s.e.}$ ),  $b = 0.015 \pm 0.004$  ( $\pm 1 \text{ s.e.}$ ),  $N = 77$ ,  $p = 0.0007$ ,  $R^2 = 0.14$ . This corresponds to  $Q_{10} = 10^{10b} = 1.4$

(Makarieva et al. 2006), with 95% C.I. for  $Q_{10}$  from 1.2 to 1.7. This  $Q_{10}$  was used to convert qWkg to 25 ° C, column “q25Wkg”, as follows: **q25Wkg** = **qWkg** × 1.4<sup>(25 - TC)/10</sup>, dimension W (kg WM)<sup>-1</sup>. For each species rows are arranged in the order of increasing **q25Wkg**.

Log<sub>10</sub>-transformed values of **q25Wkg** (W (kg WM)<sup>-1</sup>), minimum for each species, were used in the analyses shown in Figures 1 and 2 and Table 1 in the paper (a total of 88 values for n = 88 species). The corresponding rows are highlighted in blue.

References within Table **S9** to Tables, Figures etc. refer to the corresponding items in the original literature indicated in the **Source** column.

Table **S9**. Dark respiration rates in eukaryotic macroalgae.

| Species                                | U | Original units                                                              | qou   | qWkg | TC  | q25Wkg | Phylum: Class                      | Source                | Comments                                                                                                                                                                                                                         |
|----------------------------------------|---|-----------------------------------------------------------------------------|-------|------|-----|--------|------------------------------------|-----------------------|----------------------------------------------------------------------------------------------------------------------------------------------------------------------------------------------------------------------------------|
| 1. <i>Acrosiphonia penicilliformis</i> | W | μmol O <sub>2</sub> (g WM) <sup>-1</sup> hr <sup>-1</sup>                   | 1.56  | 0.19 | 1.5 | 0.42   | Chlorophyta:<br>Ulvothamniophyceae | Aguilera et al. 1999  | Arctic; dark respiration measured for 3-4 hrs after 2 hr exposure to artificial photosynthetic active radiation (PAR) or PAR and ultraviolet radiation                                                                           |
| 2. <i>Adenocystis utricularis</i>      | D | μmol CO <sub>2</sub> (g WM) <sup>-1</sup> hr <sup>-1</sup> at DM/WM = 0.212 | 2.80  | 0.50 | 0   | 1.16   | Ochrophyta:<br>Phaeophyceae        | Weykam et al. 1996    | Antarctic species; Chl a/DM = 0.0030                                                                                                                                                                                             |
| 3. <i>Antarctosaccion applanatum</i>   | D | μmol CO <sub>2</sub> (g WM) <sup>-1</sup> hr <sup>-1</sup> at DM/WM = 0.196 | 62.10 | 11.8 | 0   | 27.37  | Ochrophyta:<br>Phaeothamniophyceae | Weykam et al. 1996    | Antarctic species; Chl a/DM = 0.0064                                                                                                                                                                                             |
| 4. <i>Ascophyllum nodosum</i>          | W | μmol O <sub>2</sub> (g WM) <sup>-1</sup> hr <sup>-1</sup>                   | 2.9   | 0.36 | 10  | 0.60   | Ochrophyta:<br>Phaeophyceae        | Skene 2004            | Scotland; mean temperature of coastal North Sea; measurements were taken over a 10-min period, which was long enough to observe a constant rate of change of O <sub>2</sub> concentration                                        |
| 5. <i>Ascoseira mirabilis</i>          | D | μmol CO <sub>2</sub> (g WM) <sup>-1</sup> hr <sup>-1</sup> at DM/WM = 0.132 | 11.75 | 3.3  | 0   | 7.65   | Ochrophyta:<br>Phaeophyceae        | Weykam et al. 1996    | Antarctic species; Chl a/DM = 0.0065                                                                                                                                                                                             |
| 6. <i>Audouinella hermannii</i>        | D | mg O <sub>2</sub> (g DM) <sup>-1</sup> hr <sup>-1</sup>                     | 4     | 4.5  | 15  | 6.30   | Rhodophyta:<br>Florideophyceae     | Necchi & Zucchi 2001  | Brazil, freshwater; dark respiration measured for 45 minutes; temperature closest to the naturally encountered is chosen; studied temperatures 10, 15, 20, 25 °C; culture specimens                                              |
| 7. <i>Audouinella pygmaea</i>          | D | mg O <sub>2</sub> (g DM) <sup>-1</sup> hr <sup>-1</sup>                     | 7.5   | 8.7  | 20  | 10.29  | Rhodophyta:<br>Florideophyceae     | Necchi & Zucchi 2001  | Brazil, freshwater; dark respiration measured for 45 minutes; temperature closest to the naturally encountered is chosen; studied temperatures 10, 15, 20, 25 °C; culture specimens; at 25 °C respiration is less than at 20 °C. |
| 8. <i>Ballia callitricha</i>           | D | μmol O <sub>2</sub> (g WM) <sup>-1</sup> hr <sup>-1</sup> at DM/WM = 0.212  | 2     | 0.35 | 0   | 0.81   | Rhodophyta:<br>Florideophyceae     | Eggert & Wiencke 2000 | Antarctic species; Chl a/DM = 0.0006-0.0011 depending on growth temperature                                                                                                                                                      |
| 9. <i>Ballia callitricha</i>           | D | μmol CO <sub>2</sub> (g WM) <sup>-1</sup> hr <sup>-1</sup> at DM/WM = 0.547 | 33    | 7.5  | 0   | 17.39  | Rhodophyta:<br>Florideophyceae     | Weykam et al. 1996    | Antarctic species; Chl a/DM = 0.0012                                                                                                                                                                                             |
| 10. <i>Bangia atropurpurea</i>         | D | mg O <sub>2</sub> (mg DM) <sup>-1</sup> hr <sup>-1</sup>                    | 1.34  | 1.5  | 15  | 2.10   | Rhodophyta:<br>Bangiophyceae       | Graham & Graham 1987  | Lake Ontario                                                                                                                                                                                                                     |
| 11. <i>Batrachospermum ambiguum</i>    | D | mg O <sub>2</sub> (g DM) <sup>-1</sup> hr <sup>-1</sup>                     | 6     | 7.1  | 20  | 8.40   | Rhodophyta:<br>Florideophyceae     | Necchi & Zucchi 2001  | Brazil, freshwater; dark respiration measured for 45 minutes; temperature closest to the naturally encountered is chosen; studied temperatures 10, 15, 20, 25 °C                                                                 |

|                                        |     |                                                                             |      |      |    |       |                                    |                         |                                                                                                                                                                                                                                                                                                        |
|----------------------------------------|-----|-----------------------------------------------------------------------------|------|------|----|-------|------------------------------------|-------------------------|--------------------------------------------------------------------------------------------------------------------------------------------------------------------------------------------------------------------------------------------------------------------------------------------------------|
| 12. <i>Batrachospermum delicatulum</i> | D   | mg O <sub>2</sub> (g DM) <sup>-1</sup> hr <sup>-1</sup>                     | 1.1  | 1.4  | 20 | 1.66  | Rhodophyta:<br>Florideophyceae     | Necchi & Alves 2005     | Brazil; The lowest value from Table 2; 'Chantransia' stage; samples of field populations were collected or measured (noon ±2 h) at the end of the typical growth period in this region (September to October); respiration ranged from 1.1. to 10.3; in cultured algae from 0.6 to 13.6 original units |
| 13. <i>Batrachospermum delicatulum</i> | D   | mg O <sub>2</sub> (g DM) <sup>-1</sup> hr <sup>-1</sup>                     | 4.5  | 5.3  | 25 | 5.30  | Rhodophyta:<br>Florideophyceae     | Necchi 2004             | Brazil; also studied temperatures 10, 15, 20 °C                                                                                                                                                                                                                                                        |
| 14. <i>Batrachospermum macrosporum</i> | D   | mg O <sub>2</sub> (g DM) <sup>-1</sup> hr <sup>-1</sup>                     | 1.2  | 1.5  | 20 | 1.77  | Rhodophyta:<br>Florideophyceae     | Necchi & Zucchi 2001    | Brazil, freshwater; dark respiration measured for 45 minutes; temperature closest to the naturally encountered is chosen; studied temperatures 10, 15, 20, 25 °C; culture specimens "Chantransia" stage                                                                                                |
| 15. <i>Batrachospermum vogesiacum</i>  | D   | mg O <sub>2</sub> (g DM) <sup>-1</sup> hr <sup>-1</sup>                     | 4.4  | 5.1  | 25 | 5.10  | Rhodophyta:<br>Florideophyceae     | Necchi & Zucchi 2001    | Brazil, freshwater; dark respiration measured for 45 minutes; temperature closest to the naturally encountered is chosen; studied temperatures 10, 15, 20, 25 °C                                                                                                                                       |
| 16. <i>Bostrychia moritziana</i>       | W   | μmol O <sub>2</sub> (mg Chl a) hr <sup>-1</sup> at Chl a/WM = 0.001         | 18   | 2.2  | 25 | 2.20  | Rhodophyta:<br>Florideophyceae     | Karsten et al. 1993     | Isolates from Venezuela; Australian samples respired at 62.6/7.6 orig. units (rate of photosynthesis divided by the ratio of photosynthesis to respiration)                                                                                                                                            |
| 17. <i>Callophyllis</i> sp.            | D   | μmol CO <sub>2</sub> (g WM) <sup>-1</sup> hr <sup>-1</sup> at DM/WM = 0.272 | 6.71 | 0.93 | 0  | 2.16  | Rhodophyta:<br>Florideophyceae     | Weykam et al. 1996      | Antarctic species; Chl a/DM = 0.0023                                                                                                                                                                                                                                                                   |
| 18. <i>Callophyllis variegata</i>      | D   | μmol CO <sub>2</sub> (g WM) <sup>-1</sup> hr <sup>-1</sup> at DM/WM = 0.150 | 6.15 | 1.54 | 0  | 3.57  | Rhodophyta:<br>Florideophyceae     | Weykam et al. 1996      | Antarctic species; Chl a/DM = 0.0015                                                                                                                                                                                                                                                                   |
| 19. <i>Caulerpa taxifolia</i>          | D   | μmol O <sub>2</sub> (g DM) <sup>-1</sup> min <sup>-1</sup>                  | 0.27 | 0.6  | 22 | 0.66  | Chlorophyta:<br>Bryopsidophyceae   | Chisholm et al. 2000    | Subtropical Australia; 22 °C is within the natural temperature range of this species; respiration increases with decreasing temperature (negative Q <sub>10</sub> ); Chl a/ DM = 0.0007-0.0031                                                                                                         |
| 20. <i>Chaetomorpha</i> sp.            | Chl | μmol C (mg Chl a) <sup>-1</sup> hr <sup>-1</sup>                            | 3.0  | 0.3  | 24 | 0.31  | Chlorophyta:<br>Ulvophyceae        | Burris 1977             | The original value is the ratio of (net photosynthetic rate) in the air (Table 1) to the (steady-state dark respiration rate); temperature is close to the ambient temperature in the northern Gulf of California at the time of collection                                                            |
| 21. <i>Chara braunii</i>               | D   | mg O <sub>2</sub> (g DM) <sup>-1</sup> hr <sup>-1</sup>                     | 3    | 3.5  | 25 | 3.50  | Charophyta:<br>Charophyceae        | Vieira & Necchi 2003    | Brazil; also studied temperatures 10, 15, 20 °C                                                                                                                                                                                                                                                        |
| 22. <i>Chara guarinensis</i>           | D   | mg O <sub>2</sub> (g DM) <sup>-1</sup> hr <sup>-1</sup>                     | 3.5  | 4.1  | 25 | 4.10  | Charophyta:<br>Charophyceae        | Vieira & Necchi 2003    | Brazil; also studied temperatures 10, 15, 20 °C                                                                                                                                                                                                                                                        |
| 23. <i>Chara hispida</i>               | D   | mg O <sub>2</sub> (g ash-free DM) <sup>-1</sup> hr <sup>-1</sup>            | 2    | 2.4  | 30 | 2.03  | Charophyta:<br>Charophyceae        | Menendez & Sanchez 1998 | Spain; dark respiration in May, period of maximum photosynthesis; also studied temperatures 10, 20 °C; Q <sub>10</sub> between 20 and 30 °C is less than unity; Chl a/WM = 0.00005-0.0004 depending on the season                                                                                      |
| 24. <i>Cladophora glomerata</i>        | D   | mg O <sub>2</sub> (g DM) <sup>-1</sup> hr <sup>-1</sup>                     | 3.8  | 4.4  | 25 | 4.40  | Chlorophyta:<br>Ulvophyceae        | Necchi 2004             | Brazil; also studied temperatures 10, 15, 20, 30 °C                                                                                                                                                                                                                                                    |
| 25. <i>Cladophora glomerata</i>        | D   | mg O <sub>2</sub> (g DM) <sup>-1</sup> hr <sup>-1</sup>                     | 4    | 4.7  | 25 | 4.70  | Chlorophyta:<br>Ulvophyceae        | Necchi 2004             | Brazil; also studied temperatures 10, 15, 20, 30 °C                                                                                                                                                                                                                                                    |
| 26. <i>Compsopogon coeruleus</i>       | D   | mg O <sub>2</sub> (g DM) <sup>-1</sup> hr <sup>-1</sup>                     | 3.4  | 3.9  | 20 | 4.61  | Rhodophyta:<br>Compsopogonophyceae | Necchi & Zucchi 2001    | Brazil, freshwater; dark respiration measured for 45 minutes; temperature closest to the naturally encountered is chosen; studied temperatures 10, 15, 20, 25 °C                                                                                                                                       |
| 27. <i>Compsopogon coeruleus</i>       | D   | mg O <sub>2</sub> (g DM) <sup>-1</sup> hr <sup>-1</sup>                     | 7.2  | 12   | 25 | 12.00 | Rhodophyta:<br>Compsopogonophyceae | Necchi 2004             | Brazil; also studied temperatures 10, 15, 20, 30 °C                                                                                                                                                                                                                                                    |

|                                           |     |                                                                             |       |      |     |       |                             |                       |                                                                                                                                                                                                        |
|-------------------------------------------|-----|-----------------------------------------------------------------------------|-------|------|-----|-------|-----------------------------|-----------------------|--------------------------------------------------------------------------------------------------------------------------------------------------------------------------------------------------------|
| 28. <i>Curdiea racovitzae</i>             | D   | $\mu\text{mol CO}_2$ (g WM) <sup>-1</sup> hr <sup>-1</sup> at DM/WM = 0.337 | 5.59  | 0.62 | 0   | 1.44  | Rhodophyta: Florideophyceae | Weykam et al. 1996    | Antarctic species; Chl a/DM = 0.0011                                                                                                                                                                   |
| 29. <i>Cystosphaera jacquinotii</i>       | D   | $\mu\text{mol CO}_2$ (g WM) <sup>-1</sup> hr <sup>-1</sup> at DM/WM = 0.151 | 10.07 | 2.5  | 0   | 5.80  | Ochrophyta: Phaeophyceae    | Weykam et al. 1996    | Antarctic species; Chl a/DM = 0.0028                                                                                                                                                                   |
| 30. <i>Delesseria lancifolia</i>          | D   | $\mu\text{mol CO}_2$ (g WM) <sup>-1</sup> hr <sup>-1</sup> at DM/WM = 0.209 | 31.33 | 5.60 | 0   | 12.99 | Rhodophyta: Florideophyceae | Weykam et al. 1996    | Antarctic species; Chl a/DM = 0.0023                                                                                                                                                                   |
| 31. <i>Desmarestia aculeata</i>           | W   | $\mu\text{mol O}_2$ (g WM) <sup>-1</sup> hr <sup>-1</sup>                   | 2.75  | 0.34 | 1.5 | 0.75  | Ochrophyta: Phaeophyceae    | Aguilera et al. 1999  | Arctic; dark respiration measured for 3-4 hrs after 2 hr exposure to artificial photosynthetic active radiation (PAR) or PAR and ultraviolet radiation                                                 |
| 32. <i>Desmarestia anceps</i>             | D   | $\mu\text{mol CO}_2$ (g WM) <sup>-1</sup> hr <sup>-1</sup> at DM/WM = 0.187 | 21.26 | 4.25 | 0   | 9.86  | Ochrophyta: Phaeophyceae    | Weykam et al. 1996    | Antarctic species; Chl a/DM = 0.0037                                                                                                                                                                   |
| 33. <i>Desmarestia antarctica</i> (adult) | D   | $\mu\text{mol CO}_2$ (g WM) <sup>-1</sup> hr <sup>-1</sup> at DM/WM = 0.287 | 8.39  | 1.09 | 0   | 2.53  | Ochrophyta: Phaeophyceae    | Weykam et al. 1996    | Antarctic species; Chl a/DM = 0.0032; juveniles respire at 22.38 $\mu\text{mol CO}_2$ (g FM) <sup>-1</sup> hr <sup>-1</sup> at DM/WM = 0.166 (qWkg = 5 W kg <sup>-1</sup> ) and have Chl a/DM = 0.0038 |
| 34. <i>Desmarestia menziesii</i>          | D   | $\mu\text{mol CO}_2$ (g WM) <sup>-1</sup> hr <sup>-1</sup> at DM/WM = 0.141 | 12.31 | 3.26 | 0   | 7.56  | Ochrophyta: Phaeophyceae    | Weykam et al. 1996    | Antarctic species; Chl a/DM = 0.0075                                                                                                                                                                   |
| 35. <i>Devaleraea ramentacea</i>          | W   | $\mu\text{mol O}_2$ (g WM) <sup>-1</sup> hr <sup>-1</sup>                   | 0.90  | 0.11 | 1.5 | 0.24  | Rhodophyta: Florideophyceae | Aguilera et al. 1999  | Arctic; dark respiration measured for 3-4 hrs after 2 hr exposure to artificial photosynthetic active radiation (PAR) or PAR and ultraviolet radiation                                                 |
| 36. <i>Enteromorpha bulbosa</i>           | D   | $\mu\text{mol CO}_2$ (g WM) <sup>-1</sup> hr <sup>-1</sup> at DM/WM = 0.193 | 11.19 | 2.2  | 0   | 5.10  | Chlorophyta: Ulvophyceae    | Weykam et al. 1996    | Antarctic species; Chl a/DM = 0.0077                                                                                                                                                                   |
| 37. <i>Enteromorpha</i> sp.               | Chl | $\mu\text{mol C}$ (mg Chl a) <sup>-1</sup> hr <sup>-1</sup>                 | 7.7   | 0.9  | 20  | 1.06  | Chlorophyta: Ulvophyceae    | Burris 1977           | The original value is the ratio of (net photosynthetic rate) in the air (Table 1) to the (steady-state dark respiration rate); species collected in California                                         |
| 38. <i>Fucus distichus</i>                | W   | $\mu\text{mol O}_2$ (g WM) <sup>-1</sup> hr <sup>-1</sup>                   | 0.88  | 0.11 | 1.5 | 0.24  | Ochrophyta: Phaeophyceae    | Aguilera et al. 1999  | Arctic; dark respiration measured for 3-4 hrs after 2 hr exposure to artificial photosynthetic active radiation (PAR) or PAR and ultraviolet radiation                                                 |
| 39. <i>Fucus serratus</i>                 | W   | $\mu\text{mol O}_2$ (g WM) <sup>-1</sup> hr <sup>-1</sup>                   | 1.5   | 0.19 | 10  | 0.31  | Ochrophyta: Phaeophyceae    | Skene 2004            | Scotland; mean temperature of coastal North Sea; measurements were taken over a 10-min period, which was long enough to observe a constant rate of change of O <sub>2</sub> concentration              |
| 40. <i>Fucus spiralis</i>                 | W   | $\mu\text{mol O}_2$ (g WM) <sup>-1</sup> hr <sup>-1</sup>                   | 4.2   | 0.52 | 10  | 0.86  | Ochrophyta: Phaeophyceae    | Skene 2004            | Scotland; mean temperature of coastal North Sea; measurements were taken over a 10-min period, which was long enough to observe a constant rate of change of O <sub>2</sub> concentration              |
| 41. <i>Fucus vesiculosus</i>              | W   | $\mu\text{mol O}_2$ (g WM) <sup>-1</sup> hr <sup>-1</sup>                   | 2.5   | 0.31 | 10  | 0.51  | Ochrophyta: Phaeophyceae    | Skene 2004            | Scotland; mean temperature of coastal North Sea; measurements were taken over a 10-min period, which was long enough to observe a constant rate of change of O <sub>2</sub> concentration              |
| 42. <i>Geminocarpus geminatus</i>         | D   | $\mu\text{mol CO}_2$ (g WM) <sup>-1</sup> hr <sup>-1</sup> at DM/WM = 0.229 | 25.73 | 4.19 | 0   | 9.72  | Ochrophyta: Phaeophyceae    | Weykam et al. 1996    | Antarctic species; Chl a/DM = 0.0095                                                                                                                                                                   |
| 43. <i>Georgiella confluens</i>           | D   | $\mu\text{mol CO}_2$ (g WM) <sup>-1</sup> hr <sup>-1</sup> at DM/WM = 0.201 | 15.66 | 2.91 | 0   | 6.75  | Rhodophyta: Florideophyceae | Weykam et al. 1996    | Antarctic species; Chl a/DM = 0.0040                                                                                                                                                                   |
| 44. <i>Gigartina skottsbergii</i>         | D   | $\mu\text{mol O}_2$ (g WM) <sup>-1</sup> h <sup>-1</sup> at DM/WM = 0.222   | 2.5   | 0.42 | 0   | 0.97  | Rhodophyta: Florideophyceae | Eggert & Wiencke 2000 | Antarctic species; Chl a/DM = 0.0009                                                                                                                                                                   |
| 45. <i>Gigartina skottsbergii</i>         | D   | $\mu\text{mol CO}_2$ (g WM) <sup>-1</sup> hr <sup>-1</sup> at DM/WM = 0.331 | 5     | 0.56 | 0   | 1.30  | Rhodophyta: Florideophyceae | Weykam et al. 1996    | Antarctic species; Chl a/DM = 0.0007                                                                                                                                                                   |
| 46. <i>Gymnogongrus antarcticus</i>       | D   | $\mu\text{mol CO}_2$ (g WM) <sup>-1</sup> h <sup>-1</sup> at DM/WM = 0.110  | 2.5   | 0.85 | 0   | 1.97  | Rhodophyta: Florideophyceae | Eggert & Wiencke 2000 | Antarctic species; Chl a/DM = 0.0022-0.0026 depending on growth temperature                                                                                                                            |

|                                                |   |                                                                                                                         |       |       |     |       |                              |                       |                                                                                                                                                                                                 |
|------------------------------------------------|---|-------------------------------------------------------------------------------------------------------------------------|-------|-------|-----|-------|------------------------------|-----------------------|-------------------------------------------------------------------------------------------------------------------------------------------------------------------------------------------------|
| 47. <i>Gymnogongrus antarcticus</i>            | D | $\mu\text{mol CO}_2 (\text{g WM})^{-1} \text{ hr}^{-1}$ at DM/WM = 0.228                                                | 11.2  | 1.8   | 0   | 4.17  | Rhodophyta: Florideophyceae  | Weykam et al. 1996    | Antarctic species; Chl a/DM = 0.0021                                                                                                                                                            |
| 48. <i>Halopteris obovata</i>                  | D | $\mu\text{mol CO}_2 (\text{g WM})^{-1} \text{ hr}^{-1}$ at DM/WM = 0.415                                                | 30.77 | 2.77  | 0   | 6.42  | Ochrophyta: Phaeophyceae     | Weykam et al. 1996    | Antarctic species; Chl a/DM = 0.0028                                                                                                                                                            |
| 49. <i>Himantothallus grandifolius</i>         | D | $\mu\text{mol CO}_2 (\text{g WM})^{-1} \text{ hr}^{-1}$ at DM/WM = 0.127                                                | 3.92  | 1.16  | 0   | 2.69  | Ochrophyta: Phaeophyceae     | Weykam et al. 1996    | Antarctic species; Chl a/DM = 0.0025                                                                                                                                                            |
| 50. <i>Hymenocladopsis crustigena</i>          | D | $\mu\text{mol CO}_2 (\text{g WM})^{-1} \text{ hr}^{-1}$ at DM/WM = 0.122                                                | 10.07 | 3.07  | 0   | 7.12  | Rhodophyta: Florideophyceae  | Weykam et al. 1996    | Antarctic species; Chl a/DM = 0.0028                                                                                                                                                            |
| 51. <i>Kallymenia antarctica</i>               | D | $\mu\text{mol O}_2 (\text{g WM})^{-1} \text{ hr}^{-1}$ at DM/WM = 0.140                                                 | 1.2   | 0.32  | 0   | 0.74  | Rhodophyta: Florideophyceae  | Eggert & Wiencke 2000 | Antarctic species; Chl a/DM = 0.00059-0.00073 depending on growth temperature                                                                                                                   |
| 52. <i>Kallymenia antarctica</i>               | D | $\mu\text{mol CO}_2 (\text{g WM})^{-1} \text{ hr}^{-1}$ at DM/WM = 0.183                                                | 5     | 1     | 0   | 2.32  | Rhodophyta: Florideophyceae  | Weykam et al. 1996    | Antarctic species; Chl a/DM = 0.0003                                                                                                                                                            |
| 53. <i>Laminaria digitata</i>                  | W | $\mu\text{mol O}_2 (\text{g WM})^{-1} \text{ hr}^{-1}$                                                                  | 0.66  | 0.082 | 1.5 | 0.18  | Ochrophyta: Phaeophyceae     | Aguilera et al. 1999  | Arctic; dark respiration measured for 3-4 hrs after 2 hr exposure to artificial photosynthetic active radiation (PAR) or PAR and ultraviolet radiation                                          |
| 54. <i>Laminaria saccharina</i>                | W | $\mu\text{mol O}_2 (\text{g WM})^{-1} \text{ hr}^{-1}$                                                                  | 1.00  | 0.12  | 1.5 | 0.26  | Ochrophyta: Phaeophyceae     | Aguilera et al. 1999  | Arctic; dark respiration measured for 3-4 hrs after 2 hr exposure to artificial photosynthetic active radiation (PAR) or PAR and ultraviolet radiation                                          |
| 55. <i>Laminaria saccharina</i>                | D | $\mu\text{mol O}_2 (\text{cm}^{-2} \text{ leaf area}) \text{ hr}^{-1}$ at 32.2 mg WM $\text{cm}^{-2}$ and DM/WM = 0.131 | 0.12  | 1     | 13  | 1.50  | Ochrophyta: Phaeophyceae     | Gerard 1988           | Three habitats in the vicinity of New York, roughly similar data for shallow, deep and turbid habitat; DM/WM = 0.11-0.179 (largest at high light regime); C/DM = 0.267-0.352; N/DM = 1.90-3.00% |
| 56. <i>Laminaria solidungula</i>               | W | $\mu\text{mol O}_2 (\text{g WM})^{-1} \text{ hr}^{-1}$                                                                  | 0.78  | 0.097 | 1.5 | 0.21  | Ochrophyta: Phaeophyceae     | Aguilera et al. 1999  | Arctic; dark respiration measured for 3-4 hrs after 2 hr exposure to artificial photosynthetic active radiation (PAR) or PAR and ultraviolet radiation                                          |
| 57. <i>Iridaea cordata</i>                     | D | $\mu\text{mol CO}_2 (\text{g WM})^{-1} \text{ hr}^{-1}$ at DM/WM = 0.287                                                | 5.59  | 0.73  | 0   | 1.69  | Rhodophyta: Florideophyceae  | Weykam et al. 1996    | Antarctic species; Chl a/DM = 0.0012                                                                                                                                                            |
| 58. <i>Mastocarpus stellatus</i>               | W | $\mu\text{mol O}_2 (\text{g WM})^{-1} \text{ hr}^{-1}$                                                                  | 7.8   | 0.97  | 10  | 1.61  | Rhodophyta: Florideophyceae  | Skene 2004            | Scotland; mean temperature of coastal North Sea; measurements were taken over a 10-min period, which was long enough to observe a constant rate of change of $\text{O}_2$ concentration         |
| 59. <i>Monostroma arcticum</i>                 | W | $\mu\text{mol O}_2 (\text{g WM})^{-1} \text{ hr}^{-1}$                                                                  | 5.13  | 0.64  | 1.5 | 1.41  | Chlorophyta: Ulvophyceae     | Aguilera et al. 1999  | Arctic; dark respiration measured for 3-4 hrs after 2 hr exposure to artificial photosynthetic active radiation (PAR) or PAR and ultraviolet radiation                                          |
| 60. <i>Monostroma hariotii</i>                 | D | $\mu\text{mol CO}_2 (\text{g WM})^{-1} \text{ hr}^{-1}$ at DM/WM = 0.240                                                | 16.78 | 2.6   | 0   | 6.03  | Chlorophyta: Ulvophyceae     | Weykam et al. 1996    | Antarctic species; Chl a/DM = 0.0057                                                                                                                                                            |
| 61. <i>Mougeotia</i>                           | D | $\text{mg O}_2 (\text{mg DM})^{-1} \text{ hr}^{-1}$                                                                     | 2.67  | 3.1   | 15  | 4.34  | Charophyta: Zygnematophyceae | Graham et al. 1996    | Wisconsin, USA                                                                                                                                                                                  |
| 62. <i>Myriogramme mangini</i>                 | D | $\mu\text{mol CO}_2 (\text{g WM})^{-1} \text{ hr}^{-1}$ at DM/WM = 0.172                                                | 6.71  | 1.47  | 0   | 3.41  | Rhodophyta: Florideophyceae  | Weykam et al. 1996    | Antarctic species; Chl a/DM = 0.0027                                                                                                                                                            |
| 63. <i>Myriogramme smithii</i>                 | D | $\mu\text{mol CO}_2 (\text{g WM})^{-1} \text{ hr}^{-1}$ at DM/WM = 0.255                                                | 34.69 | 5.08  | 0   | 11.78 | Rhodophyta: Florideophyceae  | Weykam et al. 1996    | Antarctic species; Chl a/DM = 0.0029                                                                                                                                                            |
| 64. <i>Nitella furcata</i> var. <i>sieberi</i> | D | $\text{mg O}_2 (\text{g DM})^{-1} \text{ hr}^{-1}$                                                                      | 1.2   | 2     | 25  | 2.00  | Charophyta: Charophyceae     | Necchi 2004           | Brazil; also studied temperatures 10, 15, 20, 30 °C                                                                                                                                             |
| 65. <i>Nitella</i> sp.                         | D | $\text{mg O}_2 (\text{g DM})^{-1} \text{ hr}^{-1}$                                                                      | 7.2   | 8.4   | 25  | 8.40  | Charophyta: Charophyceae     | Vieira & Necchi 2003  | Brazil; also studied temperatures 10, 15, 20 °C                                                                                                                                                 |
| 66. <i>Nitella subglomerata</i>                | D | $\text{mg O}_2 (\text{g DM})^{-1} \text{ hr}^{-1}$                                                                      | 6.7   | 7.8   | 25  | 7.80  | Charophyta: Charophyceae     | Vieira & Necchi 2003  | Brazil; also studied temperatures 10, 15, 20 °C                                                                                                                                                 |

|                                      |   |                                                                          |       |       |     |       |                                |                       |                                                                                                                                                                                           |
|--------------------------------------|---|--------------------------------------------------------------------------|-------|-------|-----|-------|--------------------------------|-----------------------|-------------------------------------------------------------------------------------------------------------------------------------------------------------------------------------------|
| 67. <i>Odonthalia dentata</i>        | W | $\mu\text{mol O}_2 (\text{g WM})^{-1} \text{ hr}^{-1}$                   | 2.47  | 0.31  | 1.5 | 0.68  | Rhodophyta:<br>Florideophyceae | Aguilera et al. 1999  | Arctic; dark respiration measured for 3-4 hrs after 2 hr exposure to artificial photosynthetic active radiation (PAR) or PAR and ultraviolet radiation                                    |
| 68. <i>Palmaria decipiens</i>        | D | $\mu\text{mol CO}_2 (\text{g WM})^{-1} \text{ hr}^{-1}$ at DM/WM = 0.107 | 5.59  | 1.96  | 0   | 4.55  | Rhodophyta:<br>Florideophyceae | Weykam et al. 1996    | Antarctic species; Chl a/DM = 0.0027                                                                                                                                                      |
| 69. <i>Palmaria palmata</i>          | W | $\mu\text{mol O}_2 (\text{g WM})^{-1} \text{ hr}^{-1}$                   | 1.16  | 0.14  | 1.5 | 0.31  | Rhodophyta:<br>Florideophyceae | Aguilera et al. 1999  | Arctic; dark respiration measured for 3-4 hrs after 2 hr exposure to artificial photosynthetic active radiation (PAR) or PAR and ultraviolet radiation                                    |
| 70. <i>Palmaria palmata</i>          | W | $\mu\text{mol O}_2 (\text{g WM})^{-1} \text{ hr}^{-1}$                   | 6.5   | 0.81  | 10  | 1.34  | Rhodophyta:<br>Florideophyceae | Skene 2004            | Scotland; mean temperature of coastal North Sea; measurements were taken over a 10-min period, which was long enough to observe a constant rate of change of O <sub>2</sub> concentration |
| 71. <i>Pantoneura plocamioides</i>   | D | $\mu\text{mol CO}_2 (\text{g WM})^{-1} \text{ hr}^{-1}$ at DM/WM = 0.283 | 11.19 | 1.47  | 0   | 3.41  | Rhodophyta:<br>Florideophyceae | Weykam et al. 1996    | Antarctic species; Chl a/DM = 0.0019                                                                                                                                                      |
| 72. <i>Pelvetia canaliculata</i>     | W | $\mu\text{mol O}_2 (\text{g WM})^{-1} \text{ hr}^{-1}$                   | 8.3   | 1     | 10  | 1.66  | Ochrophyta:<br>Phaeophyceae    | Skene 2004            | Scotland; mean temperature of coastal North Sea; measurements were taken over a 10-min period, which was long enough to observe a constant rate of change of O <sub>2</sub> concentration |
| 73. <i>Phaeurus antarcticus</i>      | D | $\mu\text{mol CO}_2 (\text{g WM})^{-1} \text{ hr}^{-1}$ at DM/WM = 0.193 | 10.07 | 1.94  | 0   | 4.50  | Ochrophyta:<br>Phaeophyceae    | Weykam et al. 1996    | Antarctic species; Chl a/DM = 0.0098                                                                                                                                                      |
| 74. <i>Phycodrys quercifolia</i>     | D | $\mu\text{mol CO}_2 (\text{g WM})^{-1} \text{ hr}^{-1}$ at DM/WM = 0.325 | 40.28 | 4.62  | 0   | 10.71 | Rhodophyta:<br>Florideophyceae | Weykam et al. 1996    | Antarctic species; Chl a/DM = 0.0033                                                                                                                                                      |
| 75. <i>Phycodrys rubens</i>          | W | $\mu\text{mol O}_2 (\text{g WM})^{-1} \text{ hr}^{-1}$                   | 1.53  | 0.19  | 1.5 | 0.42  | Rhodophyta:<br>Florideophyceae | Aguilera et al. 1999  | Arctic; dark respiration measured for 3-4 hrs after 2 hr exposure to artificial photosynthetic active radiation (PAR) or PAR and ultraviolet radiation                                    |
| 76. <i>Phyllophora ahnfeltioides</i> | D | $\mu\text{mol O}_2 (\text{g WM})^{-1} \text{ h}^{-1}$ at DM/WM = 0.310   | 0.8   | 0.32  | 0   | 0.74  | Rhodophyta:<br>Florideophyceae | Eggert & Wiencke 2000 | Antarctic species; Chl a/DM = 0.00012-0.00017 depending on growth temperature                                                                                                             |
| 77. <i>Phyllophora ahnfeltioides</i> | D | $\mu\text{mol CO}_2 (\text{g WM})^{-1} \text{ hr}^{-1}$ at DM/WM = 0.272 | 28    | 3.8   | 0   | 8.81  | Rhodophyta:<br>Florideophyceae | Weykam et al. 1996    | Antarctic species; Chl a/DM = 0.0006                                                                                                                                                      |
| 78. <i>Phyllophora antarctica</i>    | W | $\mu\text{mol O}_2 (\text{g WM})^{-1} \text{ hr}^{-1}$                   | 2.3   | 0.3   | 0   | 0.70  | Rhodophyta:<br>Florideophyceae | Schwarz et al. 2003   | Antarctic species; minimum respiration at studied depths (10-25 m); Chl a/WM = 0.000048-0.000071                                                                                          |
| 79. <i>Phyllophora appendiculata</i> | D | $\mu\text{mol CO}_2 (\text{g WM})^{-1} \text{ hr}^{-1}$ at DM/WM = 0.230 | 10.07 | 1.63  | 0   | 3.78  | Rhodophyta:<br>Florideophyceae | Weykam et al. 1996    | Antarctic species; Chl a/DM = 0.0027                                                                                                                                                      |
| 80. <i>Phyllophora truncata</i>      | W | $\mu\text{mol O}_2 (\text{g WM})^{-1} \text{ hr}^{-1}$                   | 0.63  | 0.078 | 1.5 | 0.17  | Rhodophyta:<br>Florideophyceae | Aguilera et al. 1999  | Arctic; dark respiration measured for 3-4 hrs after 2 hr exposure to artificial photosynthetic active radiation (PAR) or PAR and ultraviolet radiation                                    |
| 81. <i>Picconiella plumosa</i>       | D | $\mu\text{mol CO}_2 (\text{g WM})^{-1} \text{ hr}^{-1}$ at DM/WM = 0.233 | 26.85 | 4.30  | 0   | 9.97  | Rhodophyta:<br>Florideophyceae | Weykam et al. 1996    | Antarctic species; Chl a/DM = 0.0027                                                                                                                                                      |
| 82. <i>Pithophora oedogonia</i>      | D | $\text{mg O}_2 (\text{g DM})^{-1} \text{ hr}^{-1}$                       | 0.3   | 0.35  | 5   | 0.69  | Chlorophyta:<br>Ulvophyceae    | Spencer et al. 1985   | USA; uniseriate filament                                                                                                                                                                  |
| 83. <i>Plocamium cartilagineum</i>   | D | $\mu\text{mol CO}_2 (\text{g WM})^{-1} \text{ hr}^{-1}$ at DM/WM = 0.203 | 26.85 | 4.94  | 0   | 11.46 | Rhodophyta:<br>Florideophyceae | Weykam et al. 1996    | Antarctic species; Chl a/DM = 0.0028                                                                                                                                                      |
| 84. <i>Porphyra endiviifolium</i>    | D | $\mu\text{mol CO}_2 (\text{g WM})^{-1} \text{ hr}^{-1}$ at DM/WM = 0.322 | 24.62 | 2.85  | 0   | 6.61  | Rhodophyta:<br>Bangiophyceae   | Weykam et al. 1996    | Antarctic species; Chl a/DM = 0.0079                                                                                                                                                      |
| 85. <i>Porphyra umbilicalis</i>      | W | $\mu\text{mol O}_2 (\text{g WM})^{-1} \text{ hr}^{-1}$                   | 20    | 2.5   | 10  | 4.14  | Rhodophyta:<br>Bangiophyceae   | Skene 2004            | Scotland; mean temperature of coastal North Sea; measurements were taken over a 10-min period, which was long enough to observe a constant rate of change of O <sub>2</sub> concentration |



|      |                              |     |                                                               |      |       |     |       |                                  |                       |                                                                                                                                                                                                                                             |
|------|------------------------------|-----|---------------------------------------------------------------|------|-------|-----|-------|----------------------------------|-----------------------|---------------------------------------------------------------------------------------------------------------------------------------------------------------------------------------------------------------------------------------------|
| 86.  | <i>Prasiola crispa</i>       | D   | mg C (g ash-free DM) <sup>-1</sup> hr <sup>-1</sup>           | 0.05 | 0.15  | 2   | 0.33  | Chlorophyta:<br>Trebouxiophyceae | Davey 1989            | Antarctic species, terrestrial; at 2, 5, 10, 15 and 20 °C respired at 0.05, 0.14, 0.16, 0.25 and 0.5 original units, respectively; monostromatic blades or uniseriate filaments; 9% ash in dry mass; AFDM/WM = 0.17-0.20.                   |
| 87.  | <i>Prasiola crispa</i>       | D   | mg C (g ash-free DM) <sup>-1</sup> hr <sup>-1</sup>           | 0.14 | 0.42  | 5   | 0.82  | Chlorophyta:<br>Trebouxiophyceae | Davey 1989            | Antarctic species, terrestrial; at 2, 5, 10, 15 and 20 °C respired at 0.05, 0.14, 0.16, 0.25 and 0.5 original units, respectively; monostromatic blades or uniseriate filaments; 9% ash in dry mass; AFDM/WM = 0.17-0.20.                   |
| 88.  | <i>Prasiola crispa</i>       | D   | mg C (g ash-free DM) <sup>-1</sup> hr <sup>-1</sup>           | 0.16 | 0.48  | 10  | 0.80  | Chlorophyta:<br>Trebouxiophyceae | Davey 1989            | Antarctic species, terrestrial; at 2, 5, 10, 15 and 20 °C respired at 0.05, 0.14, 0.16, 0.25 and 0.5 original units, respectively; monostromatic blades or uniseriate filaments; 9% ash in dry mass; AFDM/WM = 0.17-0.20.                   |
| 89.  | <i>Prasiola crispa</i>       | D   | mg C (g ash-free DM) <sup>-1</sup> hr <sup>-1</sup>           | 0.27 | 0.81  | 15  | 1.13  | Chlorophyta:<br>Trebouxiophyceae | Davey 1989            | Antarctic species, terrestrial; at 2, 5, 10, 15 and 20 °C respired at 0.05, 0.14, 0.16, 0.25 and 0.5 original units, respectively; monostromatic blades or uniseriate filaments; 9% ash in dry mass; AFDM/WM = 0.17-0.20.                   |
| 90.  | <i>Prasiola crispa</i>       | D   | mg C (g ash-free DM) <sup>-1</sup> hr <sup>-1</sup>           | 0.5  | 1.5   | 20  | 1.77  | Chlorophyta:<br>Trebouxiophyceae | Davey 1989            | Antarctic species, terrestrial; at 2, 5, 10, 15 and 20 °C respired at 0.05, 0.14, 0.16, 0.25 and 0.5 original units, respectively; monostromatic blades or uniseriate filaments; 9% ash in dry mass; AFDM/WM = 0.17-0.20.                   |
| 91.  | <i>Ptilota plumosa</i>       | W   | μmol O <sub>2</sub> (g WM) <sup>-1</sup> hr <sup>-1</sup>     | 0.75 | 0.093 | 1.5 | 0.21  | Rhodophyta:<br>Florideophyceae   | Aguilera et al. 1999  | Arctic; dark respiration measured for 3-4 hrs after 2 hr exposure to artificial photosynthetic active radiation (PAR) or PAR and ultraviolet radiation                                                                                      |
| 92.  | <i>Saccorhiza dermatodea</i> | W   | μmol O <sub>2</sub> (g WM) <sup>-1</sup> hr <sup>-1</sup>     | 0.63 | 0.078 | 1.5 | 0.17  | Ochrophyta:<br>Phaeophyceae      | Aguilera et al. 1999  | Arctic; dark respiration measured for 3-4 hrs after 2 hr exposure to artificial photosynthetic active radiation (PAR) or PAR and ultraviolet radiation                                                                                      |
| 93.  | <i>Sargassum natans</i>      | D   | mg C (g DM) <sup>-1</sup> hr <sup>-1</sup>                    | 0.31 | 0.9   | 27  | 0.84  | Ochrophyta:<br>Phaeophyceae      | Lapointe 1995         | Mean value for oceanic populations (natural ambient temperature from 18 to 29 °C); neritic populations (temp from 24 to 30) respired at 0.51 orig. units                                                                                    |
| 94.  | <i>Sargassum</i> sp.         | Chl | μmol C (mg Chl a) <sup>-1</sup> hr <sup>-1</sup>              | 7.9  | 0.9   | 24  | 0.93  | Ochrophyta:<br>Phaeophyceae      | Burris 1977           | The original value is the ratio of (net photosynthetic rate) in the air (Table 1) to the (steady-state dark respiration rate); temperature is close to the ambient temperature in the northern Gulf of California at the time of collection |
| 95.  | <i>Spirogyra</i> sp.         | D   | mg O <sub>2</sub> (g DM) <sup>-1</sup> hr <sup>-1</sup>       | 7.5  | 12.5  | 25  | 12.50 | Charophyta:<br>Zygnematophyceae  | Necchi 2004           | Brazil; also studied temperatures 10, 15, 20, 30 °C                                                                                                                                                                                         |
| 96.  | <i>Thorea hispida</i>        | D   | mg O <sub>2</sub> (g DM) <sup>-1</sup> hr <sup>-1</sup>       | 6.2  | 7.2   | 25  | 7.20  | Rhodophyta:<br>Florideophyceae   | Necchi & Zucchi 2001  | Brazil, freshwater; dark respiration measured for 45 minutes; temperature closest to the naturally encountered is chosen; studied temperatures 10, 15, 20, 25 °C; no change of respiration between 20 and 25 °C                             |
| 97.  | <i>Thorea hispida</i>        | D   | mg O <sub>2</sub> (g DM) <sup>-1</sup> hr <sup>-1</sup>       | 6.2  | 10.4  | 25  | 10.40 | Rhodophyta:<br>Florideophyceae   | Necchi 2004           | Brazil; also studied temperatures 10, 15, 20, 30 °C                                                                                                                                                                                         |
| 98.  | <i>Udotea flabellum</i>      | Chl | μmol O <sub>2</sub> (mg Chl a) <sup>-1</sup> hr <sup>-1</sup> | 2.8  | 0.3   | 23  | 0.32  | Chlorophyta:<br>Udoteaceae       | Reiskind & Bowes 1991 | Florida, Gulf of Mexico; measurements of dark respiration at predetermined optimum temperature                                                                                                                                              |
| 99.  | <i>Ulothrix zonata</i>       | D   | mg O <sub>2</sub> (mg DM) <sup>-1</sup> hr <sup>-1</sup>      | 2.00 | 2.3   | 15  | 3.22  | Chlorophyta:<br>Ulvophyceae      | Graham et al. 1985    | Lake Huron, USA; prolonged darkness                                                                                                                                                                                                         |
| 100. | <i>Ulothrix zonata</i>       | D   | mg O <sub>2</sub> (mg DM) <sup>-1</sup> hr <sup>-1</sup>      | 2.68 | 3     | 10  | 4.97  | Chlorophyta:<br>Ulvophyceae      | Graham et al. 1985    | Lake Huron, USA                                                                                                                                                                                                                             |
| 101. | <i>Ulothrix zonata</i>       | D   | mg O <sub>2</sub> (mg DM) <sup>-1</sup> hr <sup>-1</sup>      | 3.06 | 3.6   | 15  | 5.04  | Chlorophyta:<br>Ulvophyceae      | Graham et al. 1985    | Lake Huron, USA                                                                                                                                                                                                                             |
| 102. | <i>Ulothrix zonata</i>       | D   | mg O <sub>2</sub> (mg DM) <sup>-1</sup> hr <sup>-1</sup>      | 3.01 | 3.5   | 20  | 4.14  | Chlorophyta:<br>Ulvophyceae      | Graham et al. 1985    | Lake Huron, USA                                                                                                                                                                                                                             |

|      |                                 |   |                                                                          |       |      |    |       |                           |                    |                                                                                                                                                                                                                                                                            |
|------|---------------------------------|---|--------------------------------------------------------------------------|-------|------|----|-------|---------------------------|--------------------|----------------------------------------------------------------------------------------------------------------------------------------------------------------------------------------------------------------------------------------------------------------------------|
| 103. | <i>Ulva lactuca</i>             | W | $\mu\text{mol O}_2 (\text{g WM})^{-1} \text{ hr}^{-1}$                   | 24    | 3.0  | 10 | 4.97  | Phaeophyta                | Skene 2004         | Scotland; mean temperature of coastal North Sea; measurements were taken over a 10-min period, which was long enough to observe a constant rate of change of O <sub>2</sub> concentration; data requested from the author (author's reply to A.M. Makarieva of 07.08.2006) |
| 104. | Unknown sp. (CW / MC 56)        | D | $\mu\text{mol CO}_2 (\text{g WM})^{-1} \text{ hr}^{-1}$ at DM/WM = 0.218 | 10.07 | 1.72 | 0  | 3.99  | Rhodophyta                | Weykam et al. 1996 | Antarctic species; Chl a/DM = 0.0029                                                                                                                                                                                                                                       |
| 105. | <i>Urospora penicilliformis</i> | D | $\mu\text{mol CO}_2 (\text{g WM})^{-1} \text{ hr}^{-1}$ at DM/WM = 0.162 | 29.09 | 6.7  | 0  | 15.54 | Chlorophyta: Ulvophyceae  | Weykam et al. 1996 | Antarctic species; Chl a/DM = 0.012                                                                                                                                                                                                                                        |
| 106. | <i>Vaucheria fontinalis</i>     | D | $\text{mg O}_2 (\text{g DM})^{-1} \text{ hr}^{-1}$                       | 8.5   | 14   | 25 | 14.00 | Ochrophyta: Xanthophyceae | Necchi 2004        | Brazil; also studied temperatures 10, 15, 20, 30 ° C                                                                                                                                                                                                                       |

Examples of **qou** to **qWkg** conversions:

$$\textit{Acrosiphonia penicilliformis} \text{ qou} = 1.56 \mu\text{mol O}_2 (\text{g WM})^{-1} \text{ hr}^{-1} = 1.56 \times 22.4 \mu\text{l O}_2 (0.001 \text{ kg WM})^{-1} \text{ hr}^{-1} = 35 \text{ ml O}_2 (\text{kg WM})^{-1} (3600 \text{ s})^{-1} = 35 \times 20 \text{ J (kg WM)}^{-1} (3600 \text{ s})^{-1} = 0.2 \text{ W (kg WM)}^{-1} = \text{qWkg}$$

$$\textit{Chara braunii} \text{ qou} = 1.31 \mu\text{g O}_2 (\text{g DM})^{-1} \text{ hr}^{-1} = 1.31/32 \times 22.4 \times 0.001 \text{ ml O}_2 \times (20 \text{ J / ml O}_2) (0.001 \text{ kg DM})^{-1} (3600 \text{ s})^{-1} = 5.1 \text{ W (kg DM)}^{-1} = 5.1 \times 0.3 \text{ W (kg WM)}^{-1} = 1.5 \text{ W (kg WM)}^{-1} = \text{qWkg}$$

$$\textit{Gymnogongrus antarcticus} \text{ qou} = 2.5 \mu\text{mol CO}_2 (\text{g WM})^{-1} \text{ hr}^{-1} (\text{at DM/WM} = 0.11) = 2.5 \times 22.4 \times 0.001 \text{ ml O}_2 \times (20 \text{ J / ml O}_2) / 0.11 (0.001 \text{ kg DM})^{-1} (3600 \text{ s})^{-1} = 2.8 \text{ W (kg DM)}^{-1} = 2.8 \times 0.3 \text{ W (kg WM)}^{-1} = \text{qWkg}$$

## References to Table S9.

- Aguilera J., Karsten U., Lippert H., Vögele B., Philipp E., Hanelt D., Wiencke C. (1999) Effects of solar radiation on growth, photosynthesis and respiration of marine macroalgae from the Arctic. *Marine Ecology Progress Series* 191: 109-119.
- Burris J.E. (1977) Photosynthesis, photorespiration, and dark Respiration in eight species of algae. *Marine Biology* 39: 371-379.
- Chisholm J.R.M., Marchioretti M., Jaubert J.M. (2000) Effect of low water temperature on metabolism and growth of a subtropical strain of *Caulerpa taxifolia* (Chlorophyta). *Marine Ecology Progress Series* 201: 189-198.
- Davey M.C. (1989) The effects of freezing and desiccation on photosynthesis and survival of terrestrial Antarctic algae and cyanobacteria. *Polar Biology* 10: 29-36.
- Eggert A., Wiencke C. (2000) Adaptation and acclimation of growth and photosynthesis of five Antarctic red algae to low temperatures. *Polar Biology* 23: 609-618.
- Gerard V.A. (1988) Ecotypic differentiation in fight-related traits of the kelp *Laminaria saccharina*. *Marine Biology* 97: 25-36.
- Graham J.M., Arancibia-Avila P., Graham L.E. (1996) Physiological ecology of a species of the filamentous green alga *Mougeotia* under acidic conditions: Light and temperature effects on photosynthesis and respiration. *Limnology and Oceanography* 41: 253-262.



- Graham M.T., Kranzfelder J.A., Auer M.T. (1985) Light and temperature as factors regulating seasonal growth and distribution of *Ulothrix zonata* (*Ulvophyceae*). *Journal of Phycology* 21: 228-234.
- Graham M.T., Graham L.E. (1987) Growth and reproduction of *Bangia atropurpurea* (Roth) C. Ag. (Rhodophyta) from the Laurentian Great Lakes. *Aquatic Botany* 28: 317-331.
- Karsten U., West J.A., Ganesan E.K. (1993) Comparative physiological ecology of *Bostrychia moritziana* (Ceramiales, Rhodophyta) from freshwater and marine habitats. *Phycologia* 32: 401-409.
- Lapointe B.E. (1995) A comparison of nutrient-limited productivity in *Sargassum natans* from neritic vs. oceanic waters of the western North Atlantic Ocean. *Limnology and Oceanography* 40: 625-633.
- Makarieva A.M., Gorshkov V.G., Li B.-L., Chown S.L.C. (2006) Mass- and temperature-independence of minimum life-supporting metabolic rates. *Functional Ecology* 20: 83-96.
- Menendez M., Sanchez A. (1998) Seasonal variations in P-I responses of *Chara hispida* L. and *Potamogeton pectinatus* L. from stream mediterranean ponds. *Aquatic Botany* 61: 1-15.
- Necchi O. Jr. (2004) Photosynthetic responses to temperature in tropical lotic macroalgae. *Phycological Research* 52: 140-148.
- Necchi O. Jr., Alves A.H.S. (2005) Photosynthetic characteristics of the freshwater red alga *Batrachospermum delicatulum* (Skuja) Necchi & Entwisle. *Acta Botanica Brasilica* 19: 125-137.
- Necchi O. Jr., Zucchi M.R. (2001) Photosynthetic performance of freshwater Rhodophyta in response to temperature, irradiance, pH and diurnal rhythm. *Phycological Research* 49: 305-318.
- Reiskind J.B., Bowes G. (1991) The role of phosphoenolpyruvate carboxykinase in a marine macroalga with C<sub>4</sub>-like photosynthetic characteristics. *Proc. Natl. Acad. Sci. USA* 88: 2883-2887.
- Schwarz A.-M., Hawes I., Andrew N., Norkko A., Cummings V., Thrush S. (2003) Macroalgal photosynthesis near the southern global limit for growth; Cape Evans, Ross Sea, Antarctica. *Polar Biology* 26: 789-799.
- Skene K.R. (2004) Key differences in photosynthetic characteristics of nine species of intertidal macroalgae are related to their position on the shore. *Canadian Journal of Botany* 82: 177-184.
- Spencer D.F., Lembi C.A., Graham J.M. (1985) Influence of light and temperature on photosynthesis and respiration by *Pithophora oedogonia* (Mont.) Wittr. (*Chlorophyceae*). *Aquatic Botany* 23: 109-118.
- Vieira J. Jr., Necchi O. Jr. (2003) Photosynthetic characteristics of charophytes from tropical lotic ecosystems. *Phycological Research* 51: 51-60.
- Weykam G., Gómez I., Wiencke C., Iken K., Köser H. (1996) Photosynthetic characteristics and C:N ratios of macroalgae from King George Island (Antarctica). *Journal of Experimental Marine Biology and Ecology* 204: 1-22.
