# Supplementary material
Source: PubMed Central journal article supplement (PMC2579366)
Supplement: 0802148105_DS10_PDF.pdf [file 0802148105_DS10_PDF.pdf]

## Dataset S10. Dark respiration rates in green leaves

### Notes to Table S10:

The basis for this data set is formed by the data of Wright et al. (2004). Supplementary data to the paper of Wright et al. (2004), available at [www.nature.com](http://www.nature.com), contain 274 dark respiration values for 246 species. For each species the minimal value in the data set was taken. To the resulting set of 246 values, 25 values for 25 species were added taken from the literature. These data are marked with a reference in the “Ref” column; references are given below the table. Data without a reference are from Wright et al. (2004).

**LogRdmass** is the original unit of dark respiration rate in the data set of Wright et al. (2004). It is equal to the decimal logarithm of dark respiration rate **Rdmass** measured in  $\text{nmol CO}_2 (\text{g DM})^{-1} \text{s}^{-1}$ , where DM is dry leaf mass. Using the respiration coefficient of unity (1 mol  $\text{CO}_2$  released per 1 mol  $\text{O}_2$  consumed), energy conversion coefficient of 20 J  $(\text{ml O}_2)^{-1}$  and dry mass/ wet mass ratio  $\text{DM}/\text{WM} = 0.3$  (crude mean for all taxa applied in the analysis (SI Methods, Table S12a), **Rdmass** was converted to **qWkg** ( $\text{W (kg WM)}^{-1}$ ) as follows:  $\text{qWkg} = \text{Rdmass} \times 22.4 \text{ ml O}_2 \text{ mol}^{-1} \times 20 \text{ J (ml O}_2)^{-1} \times 0.3 \times 10^{-3} = 0.134 \text{ Rdmass W (kg WM)}^{-1}$ . Or, for the decimal logarithms, **LogqWkg** = **LogRdmass** – 0.87. The resulting 271 **qWkg** values for 271 species were used in the analyses shown in Figures 1 and 2 and Table 1 in the paper. **Logqd** is an auxiliary variable equal to the decimal logarithm of dark respiration rate expressed in  $\text{W (kg DM)}^{-1}$ .

### Main reference:

Wright I.J., Reich P.B., Westoby M., Ackerly D.D., Baruch Z., Bongers F., Cavender-Bares J., Chapin T., Cornelissen J.H.C., Diemer M., Flexas J., Garnier E., Groom P.K., Gulias J., Hikosaka K., Lamont B.B., Lee T., Lee W., Lusk C., Midgley J.J., Navas M.-L., Niinemets Ü., Oleksyn J., Osada N., Poorter H., Poot P., Prior L., Pyankov V.I., Roumet C., Thomas S.C., Tjoelker M.G., Veneklaas E.J., Villar R. (2004) The worldwide leaf economics spectrum. *Nature* 428: 821-827.

Table S10. Dark respiration in green leaves

| Species                            | logRdmass | Logqd | LogqWkg | Ref                  |
|------------------------------------|-----------|-------|---------|----------------------|
| 1. <i>Abies lasiocarpa</i>         | 0.54      | 0.19  | -0.33   |                      |
| 2. <i>Acacia colletioides</i>      | 0.76      | 0.41  | -0.11   |                      |
| 3. <i>Acacia doratoxylon</i>       | 0.83      | 0.48  | -0.04   |                      |
| 4. <i>Acacia floribunda</i>        | 1.03      | 0.68  | 0.16    |                      |
| 5. <i>Acacia havilandiorum</i>     | 0.95      | 0.60  | 0.08    |                      |
| 6. <i>Acacia oswaldii</i>          | 0.65      | 0.30  | -0.22   |                      |
| 7. <i>Acacia suaveolens</i>        | 0.84      | 0.49  | -0.03   |                      |
| 8. <i>Acacia willhelmiana</i>      | 1.06      | 0.71  | 0.19    |                      |
| 9. <i>Acer rubrum</i>              | 0.93      | 0.58  | 0.06    |                      |
| 10. <i>Acer saccharum</i>          | 0.85      | 0.50  | -0.02   |                      |
| 11. <i>Achillea millefolium</i>    | 1.18      | 0.83  | 0.31    |                      |
| 12. <i>Acomastylis rosii</i>       | 1.32      | 0.97  | 0.45    |                      |
| 13. <i>Adenanthos cygnorum</i>     | 0.64      | 0.29  | -0.23   |                      |
| 14. <i>Adinandra dumosa</i>        | 0.99      | 0.64  | 0.12    |                      |
| 15. <i>Aextoxicon punctatum</i>    | 0.57      | 0.22  | -0.30   |                      |
| 16. <i>Agropyron repens</i>        | 1.13      | 0.78  | 0.26    |                      |
| 17. <i>Agrostis scabra</i>         | 1.51      | 1.16  | 0.64    |                      |
| 18. <i>Allocauarina</i> sp         | 0.89      | 0.54  | 0.02    |                      |
| 19. <i>Ambrosia artemisiifolia</i> | 1.42      | 1.07  | 0.55    |                      |
| 20. <i>Amomyrtus luma</i>          |           |       | -0.08   | Lusk & del Poso 2002 |
| 21. <i>Amorpha canescens</i>       | 1.24      | 0.89  | 0.37    |                      |
| 22. <i>Anacardium excelsum</i>     | 1.41      | 1.06  | 0.54    |                      |
| 23. <i>Andersonia heterophylla</i> | 1.08      | 0.73  | 0.21    |                      |
| 24. <i>Andropogon gerardi</i>      | 1.13      | 0.78  | 0.26    |                      |
| 25. <i>Anemone cylindrica</i>      | 1.11      | 0.76  | 0.24    |                      |

|      |                                   |       |       |       |                      |
|------|-----------------------------------|-------|-------|-------|----------------------|
| 26.  | <i>Anthocephalus chinensis</i>    | 1.37  | 1.02  | 0.50  | Feng et al. 2004     |
| 27.  | <i>Antirrhoea trichantha</i>      | 1.26  | 0.91  | 0.39  |                      |
| 28.  | <i>Arctostaphylos uva-ursi</i>    | 0.72  | 0.37  | -0.15 |                      |
| 29.  | <i>Aristotelia chilensis</i>      |       |       | 0.14  | Lusk & del Poso 2002 |
| 30.  | <i>Asclepias syriaca</i>          | 1.45  | 1.10  | 0.58  |                      |
| 31.  | <i>Asclepias tuberosa</i>         | 1.28  | 0.93  | 0.41  |                      |
| 32.  | <i>Aster azureus</i>              | 1.24  | 0.89  | 0.37  |                      |
| 33.  | <i>Aster ericoides</i>            | 1.30  | 0.95  | 0.43  |                      |
| 34.  | <i>Astragalus candensis</i>       | 1.32  | 0.97  | 0.45  |                      |
| 35.  | <i>Astroloma xerophyllum</i>      | 0.86  | 0.51  | -0.01 |                      |
| 36.  | <i>Astrotricha floccosa</i>       | 0.95  | 0.60  | 0.08  |                      |
| 37.  | <i>Atriplex canescens</i>         | 1.09  | 0.74  | 0.22  |                      |
| 38.  | <i>Atriplex stipitata</i>         | 1.59  | 1.24  | 0.72  |                      |
| 39.  | <i>Austrocedrus chilensis</i>     | 0.79  | 0.44  | -0.08 |                      |
| 40.  | <i>Baccharis angustifolia</i>     | 1.24  | 0.89  | 0.37  |                      |
| 41.  | <i>Banksia attenuata</i>          | 0.80  | 0.45  | -0.07 |                      |
| 42.  | <i>Banksia marginata</i>          | 0.68  | 0.33  | -0.19 |                      |
| 43.  | <i>Banksia menziesii</i>          | 0.75  | 0.40  | -0.12 |                      |
| 44.  | <i>Baptisia leucophaea</i>        | 1.56  | 1.21  | 0.69  |                      |
| 45.  | <i>Barringtonia macrostachya</i>  | 0.98  | 0.63  | 0.11  | Feng et al. 2004     |
| 46.  | <i>Bellucia grossularioides</i>   | 0.90  | 0.55  | 0.03  |                      |
| 47.  | <i>Bertya cunninghamii</i>        | 1.01  | 0.66  | 0.14  |                      |
| 48.  | <i>Beyeria opaca</i>              | 0.97  | 0.62  | 0.10  |                      |
| 49.  | <i>Bistorta bistortoides</i>      | 1.45  | 1.10  | 0.58  |                      |
| 50.  | <i>Boronia ledifolia</i>          | 0.79  | 0.44  | -0.08 |                      |
| 51.  | <i>Bossiaea eriocarpa</i>         | 0.96  | 0.61  | 0.09  |                      |
| 52.  | <i>Bossiaea walkeri</i>           | 0.83  | 0.48  | -0.04 |                      |
| 53.  | <i>Bouteloua curtipendula</i>     | 1.19  | 0.84  | 0.32  |                      |
| 54.  | <i>Brachychiton populneus</i>     | 0.67  | 0.32  | -0.20 |                      |
| 55.  | <i>Bromus inermis</i>             | 1.13  | 0.78  | 0.26  |                      |
| 56.  | <i>Calamovilfa longifolia</i>     | 1.10  | 0.75  | 0.23  |                      |
| 57.  | <i>Caldecluvia paniculata</i>     |       |       | 0.04  | Lusk & del Poso 2002 |
| 58.  | <i>Callitris glaucophylla</i>     | 0.62  | 0.27  | -0.25 |                      |
| 59.  | <i>Calophyllum polyanthum</i>     | 0.93  | 0.58  | 0.06  | Feng et al. 2004     |
| 60.  | <i>Calytrix flavescens</i>        | 0.88  | 0.53  | 0.01  |                      |
| 61.  | <i>Carya glabra</i>               | 1.01  | 0.66  | 0.14  |                      |
| 62.  | <i>Cassinia laevis</i>            | 1.11  | 0.76  | 0.24  |                      |
| 63.  | <i>Castanopsis sieboldii</i>      | 0.65  | 0.30  | -0.22 |                      |
| 64.  | <i>Castilla elastica</i>          | 1.43  | 1.08  | 0.56  |                      |
| 65.  | <i>Cecropia ficifolia</i>         | 1.26  | 0.91  | 0.39  |                      |
| 66.  | <i>Cecropia longipes</i>          | 1.34  | 0.99  | 0.47  |                      |
| 67.  | <i>Chionochloa macra</i>          | 0.18  | -0.17 | -0.69 | Mark 1975            |
| 68.  | <i>Chionochloa oreophila</i>      | 0.31  | -0.04 | -0.56 | Mark 1975            |
| 69.  | <i>Chionochloa rigida</i>         | -0.09 | -0.44 | -0.96 | Mark 1975            |
| 70.  | <i>Conostephium pendulum</i>      | 0.92  | 0.57  | 0.05  |                      |
| 71.  | <i>Coreopsis palmata</i>          | 1.06  | 0.71  | 0.19  |                      |
| 72.  | <i>Cornus florida</i>             | 1.04  | 0.69  | 0.17  |                      |
| 73.  | <i>Correa reflexa</i>             | 0.66  | 0.31  | -0.21 |                      |
| 74.  | <i>Corylus americanus</i>         | 1.00  | 0.65  | 0.13  |                      |
| 75.  | <i>Corymbia gummifera</i>         | 0.75  | 0.40  | -0.12 |                      |
| 76.  | <i>Cryptocarya alba</i>           | 0.97  | 0.62  | 0.10  |                      |
| 77.  | <i>Dasyphyllum diacanthoides</i>  | 0.89  | 0.54  | 0.02  |                      |
| 78.  | <i>Dasyphyllum diacanthoides</i>  |       |       | 0.15  | Lusk & del Poso 2002 |
| 79.  | <i>Desmodium canadense</i>        | 1.20  | 0.85  | 0.33  |                      |
| 80.  | <i>Dillenia suffruticosa</i>      | 1.02  | 0.67  | 0.15  |                      |
| 81.  | <i>Dodonaea triquetra</i>         | 1.00  | 0.65  | 0.13  |                      |
| 82.  | <i>Dodonaea viscosa spatulata</i> | 1.19  | 0.84  | 0.32  |                      |
| 83.  | <i>Drimys winteri</i>             | 0.97  | 0.62  | 0.10  |                      |
| 84.  | <i>Drimys winteri</i>             |       |       | 0.09  | Lusk & del Poso 2002 |
| 85.  | <i>Echinacea purpurea</i>         | 1.24  | 0.89  | 0.37  |                      |
| 86.  | <i>Eleagnus angustifolia</i>      | 1.37  | 1.02  | 0.50  |                      |
| 87.  | <i>Embothrium coccineum</i>       | 1.20  | 0.85  | 0.33  |                      |
| 88.  | <i>Eremaea pauciflora</i>         | 0.96  | 0.61  | 0.09  |                      |
| 89.  | <i>Eremophila deserti</i>         | 0.81  | 0.46  | -0.06 |                      |
| 90.  | <i>Eremophila glabra</i>          | 1.00  | 0.65  | 0.13  |                      |
| 91.  | <i>Eremophila mitchelli</i>       | 1.04  | 0.69  | 0.17  |                      |
| 92.  | <i>Eriostemon australasius</i>    | 0.84  | 0.49  | -0.03 |                      |
| 93.  | <i>Erythronium americanum</i>     | 1.72  | 1.37  | 0.85  |                      |
| 94.  | <i>Eucalyptus dumosa</i>          | 0.57  | 0.22  | -0.30 |                      |
| 95.  | <i>Eucalyptus haemostoma</i>      | 0.78  | 0.43  | -0.09 |                      |
| 96.  | <i>Eucalyptus intertexta</i>      | 0.74  | 0.39  | -0.13 |                      |
| 97.  | <i>Eucalyptus paniculata</i>      | 0.79  | 0.44  | -0.08 |                      |
| 98.  | <i>Eucalyptus socialis</i>        | 0.68  | 0.33  | -0.19 |                      |
| 99.  | <i>Eucalyptus umbra</i>           | 0.80  | 0.45  | -0.07 |                      |
| 100. | <i>Eucryphia cordifolia</i>       | 0.71  | 0.36  | -0.16 |                      |
| 101. | <i>Eucryphia cordifolia</i>       |       |       | 0.08  | Lusk & del Poso 2002 |

|                                  |      |      |       |                             |
|----------------------------------|------|------|-------|-----------------------------|
| 102. Eupatorium rugesum          | 1.65 | 1.30 | 0.78  |                             |
| 103. Eutaxia microphylla         | 1.17 | 0.82 | 0.30  |                             |
| 104. Fraxinus sp                 | 1.07 | 0.72 | 0.20  |                             |
| 105. Galax aphylla               | 0.99 | 0.64 | 0.12  |                             |
| 106. Geijera parviflora          | 0.76 | 0.41 | -0.11 |                             |
| 107. Gevuina avellana            | 0.81 | 0.46 | -0.06 |                             |
| 108. Gompholobium grandiflorum   | 0.95 | 0.60 | 0.08  |                             |
| 109. Grevillea aneura            | 1.02 | 0.67 | 0.15  |                             |
| 110. Grevillea buxifolia         | 1.03 | 0.68 | 0.16  |                             |
| 111. Grevillea speciosa          | 0.87 | 0.52 | 0.00  |                             |
| 112. Gutierrezia sarothrae       | 1.16 | 0.81 | 0.29  |                             |
| 113. Hakea dactyloides           | 0.59 | 0.24 | -0.28 |                             |
| 114. Hakea tephrosperma          | 0.38 | 0.03 | -0.49 |                             |
| 115. Hakea teretifolia           | 0.61 | 0.26 | -0.26 |                             |
| 116. Helianthus microcephalus    | 1.55 | 1.20 | 0.68  |                             |
| 117. Helichrysum apiculatum      | 1.55 | 1.20 | 0.68  |                             |
| 118. Hibbertia bracteata         | 0.87 | 0.52 | 0.00  |                             |
| 119. Hibbertia huegelii          | 0.77 | 0.42 | -0.10 |                             |
| 120. Hibbertia subvaginata       | 0.87 | 0.52 | 0.00  |                             |
| 121. Jacksonia floribunda        | 0.92 | 0.57 | 0.05  |                             |
| 122. Juniperus monosperma        | 0.68 | 0.33 | -0.19 |                             |
| 123. Kalmia latifolia            | 0.95 | 0.60 | 0.08  |                             |
| 124. Koeleria cristata           | 1.09 | 0.74 | 0.22  |                             |
| 125. Lambertia formosa           | 0.56 | 0.21 | -0.31 |                             |
| 126. Larrea tridentata           | 0.89 | 0.54 | 0.02  |                             |
| 127. Lasiopetalum ferrugineum    | 0.63 | 0.28 | -0.24 |                             |
| 128. Laurelia philippiana        | 0.79 | 0.44 | -0.08 |                             |
| 129. Laurelia philippiana        |      |      | 0.12  | Lusk & del Poso 2002        |
| 130. Lemna gibba                 |      |      | -0.60 | Ullrich-Eberius et al. 1981 |
| 131. Leptospermum polygalifolium | 1.15 | 0.80 | 0.28  |                             |
| 132. Leptospermum trinervium     | 1.00 | 0.65 | 0.13  |                             |
| 133. Lespedeza capitata          | 1.19 | 0.84 | 0.32  |                             |
| 134. Leucopogon conostephioides  | 1.04 | 0.69 | 0.17  |                             |
| 135. Liatris aspera              | 1.05 | 0.70 | 0.18  |                             |
| 136. Licania heteromorpha        | 0.72 | 0.37 | -0.15 |                             |
| 137. Linociera insignis          | 0.94 | 0.59 | 0.07  | Feng et al. 2004            |
| 138. Liquidambar styraciflua     | 0.53 | 0.19 | -0.33 | Hamilton et al. 2001        |
| 139. Liriodendron tulipifera     | 1.09 | 0.74 | 0.22  |                             |
| 140. Lomatia hirsuta             | 0.91 | 0.56 | 0.04  |                             |
| 141. Lomatia silaifolia          | 0.91 | 0.56 | 0.04  |                             |
| 142. Luehea seemannii            | 1.33 | 0.98 | 0.46  |                             |
| 143. Luma apiculata              | 0.97 | 0.62 | 0.10  |                             |
| 144. Lupinus perennis            | 1.32 | 0.97 | 0.45  |                             |
| 145. Lyginia barbata             | 0.60 | 0.25 | -0.27 |                             |
| 146. Lyonia lucida               | 0.76 | 0.41 | -0.11 |                             |
| 147. Macaranga heynei            | 0.87 | 0.52 | 0.00  |                             |
| 148. Machilus thunbergii         | 0.75 | 0.40 | -0.12 |                             |
| 149. Macrozamia communis         | 0.60 | 0.25 | -0.27 |                             |
| 150. Macrozamia riedlei          | 0.52 | 0.17 | -0.35 |                             |
| 151. Magnolia fraseri            | 1.00 | 0.65 | 0.13  |                             |
| 152. Mallotus paniculatus        | 1.16 | 0.81 | 0.29  |                             |
| 153. Manihot esculenta           | 1.52 | 1.17 | 0.65  |                             |
| 154. Maytenus oleodes            | 0.59 | 0.24 | -0.28 |                             |
| 155. Melaleuca acerosa           | 0.91 | 0.56 | 0.04  |                             |
| 156. Melaleuca uncinata          | 0.96 | 0.61 | 0.09  |                             |
| 157. Melastoma malabathricum     | 0.84 | 0.49 | -0.03 |                             |
| 158. Miconia dispar              | 0.72 | 0.37 | -0.15 |                             |
| 159. Micromyrtus sessilis        | 0.83 | 0.48 | -0.04 |                             |
| 160. Myrceugenia planipes        | 0.72 | 0.37 | -0.15 |                             |
| 161. Myrceugenia planipes        |      |      | -0.08 | Lusk & del Poso 2002        |
| 162. Neolitsea sericea           | 0.52 | 0.17 | -0.35 |                             |
| 163. Nothofagus dombeyi          | 0.95 | 0.60 | 0.08  |                             |
| 164. Nothofagus dombeyi          |      |      | 0.32  | Lusk & del Poso 2002        |
| 165. Nothofagus nitida           |      |      | 0.26  | Lusk & del Poso 2002        |
| 166. Nuytsia floribunda          | 0.69 | 0.34 | -0.18 |                             |
| 167. Nyssa sylvatica             | 1.04 | 0.69 | 0.17  |                             |
| 168. Ocotea costulata            | 0.70 | 0.35 | -0.17 |                             |
| 169. Olearia decurrens           | 1.09 | 0.74 | 0.22  |                             |
| 170. Olearia pimelioides         | 1.14 | 0.79 | 0.27  |                             |
| 171. Oxydendron arboreum         | 1.10 | 0.75 | 0.23  |                             |
| 172. Panicum virgatum            | 1.06 | 0.71 | 0.19  |                             |
| 173. Patersonia occidentalis     | 0.70 | 0.35 | -0.17 |                             |
| 174. Penstemon grandiflorus      | 1.20 | 0.85 | 0.33  |                             |
| 175. Persea borbonia             | 0.83 | 0.48 | -0.04 |                             |
| 176. Persea lingue               | 0.64 | 0.29 | -0.23 |                             |
| 177. Persoonia levis             | 0.40 | 0.05 | -0.47 |                             |

|                                           |       |       |       |                         |
|-------------------------------------------|-------|-------|-------|-------------------------|
| 178. <i>Persoonia linearis</i>            | 0.58  | 0.23  | -0.29 |                         |
| 179. <i>Persoonia saccata</i>             | 0.72  | 0.37  | -0.15 |                         |
| 180. <i>Petalostemum villosum</i>         | 1.25  | 0.90  | 0.38  |                         |
| 181. <i>Petrophile linearis</i>           | 0.79  | 0.44  | -0.08 |                         |
| 182. <i>Phyllothea difformis</i>          | 0.99  | 0.64  | 0.12  |                         |
| 183. <i>Phyllota phyllicoides</i>         | 1.03  | 0.68  | 0.16  |                         |
| 184. <i>Picea engelmannii</i>             | 0.51  | 0.16  | -0.36 |                         |
| 185. <i>Picea glauca</i>                  | 0.60  | 0.25  | -0.27 |                         |
| 186. <i>Pimelea linifolia</i>             | 1.22  | 0.87  | 0.35  |                         |
| 187. <i>Pimelea microcephala</i>          | 1.42  | 1.07  | 0.55  |                         |
| 188. <i>Pinus banksiana</i>               | 0.78  | 0.43  | -0.09 |                         |
| 189. <i>Pinus elliottii</i>               | -0.10 | -0.45 | -0.97 | Ryan et al. 1994        |
| 190. <i>Pinus flexilis</i>                | 0.60  | 0.25  | -0.27 |                         |
| 191. <i>Pinus palustris</i>               | 0.56  | 0.21  | -0.31 |                         |
| 192. <i>Pinus resinosa</i>                | 0.85  | 0.50  | -0.02 | Ryan et al. 1994        |
| 193. <i>Pinus rigida</i>                  | 0.72  | 0.37  | -0.15 |                         |
| 194. <i>Pinus serotina</i>                | 0.70  | 0.35  | -0.17 |                         |
| 195. <i>Pinus strobus</i>                 | 0.67  | 0.32  | -0.20 |                         |
| 196. <i>Pinus sylvestris</i>              | 0.79  | 0.44  | -0.08 |                         |
| 197. <i>Pinus taeda</i>                   | 0.42  | 0.07  | -0.45 | Ryan et al. 1994        |
| 198. <i>Platanus occidentalis</i>         | 0.89  | 0.54  | 0.02  |                         |
| 199. <i>Poa pratensis</i>                 | 1.28  | 0.93  | 0.41  |                         |
| 200. <i>Podocarpus nubigena</i>           | 0.63  | 0.28  | -0.24 |                         |
| 201. <i>Podocarpus saligna</i>            | 0.67  | 0.32  | -0.20 |                         |
| 202. <i>Podophyllum peltatum</i>          | 1.43  | 1.08  | 0.56  |                         |
| 203. <i>Pomaderris ferruginea</i>         | 0.75  | 0.40  | -0.12 |                         |
| 204. <i>Populus deltoides</i>             | 1.15  | 0.80  | 0.28  |                         |
| 205. <i>Populus fremontii</i>             | 1.16  | 0.81  | 0.29  |                         |
| 206. <i>Populus tremuloides</i>           | 1.35  | 1.00  | 0.48  |                         |
| 207. <i>Potamogeton pectinatus</i>        |       | 0.67  | 0.15  | Menendez & Sanchez 1998 |
| 208. <i>Potentilla arguta</i>             | 1.12  | 0.77  | 0.25  |                         |
| 209. <i>Prosopis glandulosa</i>           | 0.94  | 0.59  | 0.07  |                         |
| 210. <i>Protea acaulos</i>                | 0.66  | 0.31  | -0.21 |                         |
| 211. <i>Protea neriifolia</i>             | 0.35  | 0.00  | -0.52 |                         |
| 212. <i>Protea nitida</i>                 | 0.50  | 0.15  | -0.37 |                         |
| 213. <i>Protea repens</i>                 | 0.63  | 0.28  | -0.24 |                         |
| 214. <i>Protium sp1</i>                   | 0.78  | 0.43  | -0.09 |                         |
| 215. <i>Protium sp2</i>                   | 0.76  | 0.41  | -0.11 |                         |
| 216. <i>Prumnopitys andina</i>            | 0.61  | 0.26  | -0.26 |                         |
| 217. <i>Psychrophila leptosepala</i>      | 1.18  | 0.83  | 0.31  |                         |
| 218. <i>Pterocaulon pycnostachyum</i>     | 1.19  | 0.84  | 0.32  |                         |
| 219. <i>Pultenea daphnoides</i>           | 0.89  | 0.54  | 0.02  |                         |
| 220. <i>Pultenea flexilis</i>             | 1.15  | 0.80  | 0.28  |                         |
| 221. <i>Quercus alba</i>                  | 1.05  | 0.70  | 0.18  |                         |
| 222. <i>Quercus coccinea</i>              | 1.06  | 0.71  | 0.19  |                         |
| 223. <i>Quercus ellipsoidalis</i>         | 1.12  | 0.77  | 0.25  |                         |
| 224. <i>Quercus laevis</i>                | 0.80  | 0.45  | -0.07 |                         |
| 225. <i>Quercus macrocarpa</i>            | 1.25  | 0.90  | 0.38  |                         |
| 226. <i>Quercus myrsinaefolia</i>         | 0.95  | 0.60  | 0.08  |                         |
| 227. <i>Quercus prinus</i>                | 1.08  | 0.73  | 0.21  |                         |
| 228. <i>Quercus rubra</i>                 | 0.92  | 0.57  | 0.05  |                         |
| 229. <i>Quercus turbinella</i>            | 1.19  | 0.84  | 0.32  |                         |
| 230. <i>Quercus virginia var geminata</i> | 0.76  | 0.41  | -0.11 |                         |
| 231. <i>Regelia ciliata</i>               | 0.98  | 0.63  | 0.11  |                         |
| 232. <i>Rhododendron maximum</i>          | 0.58  | 0.23  | -0.29 |                         |
| 233. <i>Robinia pseudoacacia</i>          | 1.05  | 0.70  | 0.18  |                         |
| 234. <i>Rudbeckia serotina</i>            | 1.17  | 0.82  | 0.30  |                         |
| 235. <i>Salix glauca</i>                  | 1.25  | 0.90  | 0.38  |                         |
| 236. <i>Salix planifolia</i>              | 1.39  | 1.04  | 0.52  |                         |
| 237. <i>Sanguinaria canadensis</i>        | 1.81  | 1.46  | 0.94  |                         |
| 238. <i>Santalum acuminatum</i>           | 0.59  | 0.24  | -0.28 |                         |
| 239. <i>Saxegothea conspicua</i>          | 0.68  | 0.33  | -0.19 |                         |
| 240. <i>Schizachyrium scoparium</i>       | 1.09  | 0.74  | 0.22  |                         |
| 241. <i>Scholtzia involucreta</i>         | 1.00  | 0.65  | 0.13  |                         |
| 242. <i>Senna artemisioides 3lft</i>      | 1.09  | 0.74  | 0.22  |                         |
| 243. <i>Silphium integrifolium</i>        | 1.28  | 0.93  | 0.41  |                         |
| 244. <i>Silphium terebinthinaceum</i>     | 1.25  | 0.90  | 0.38  |                         |
| 245. <i>Solanum ferocissium</i>           | 1.42  | 1.07  | 0.55  |                         |
| 246. <i>Solanum straminifolia</i>         | 1.53  | 1.18  | 0.66  |                         |
| 247. <i>Solidago nemoralis</i>            | 1.16  | 0.81  | 0.29  |                         |
| 248. <i>Solidago rigida</i>               | 1.08  | 0.73  | 0.21  |                         |
| 249. <i>Sorghastrum nutans</i>            | 1.10  | 0.75  | 0.23  |                         |
| 250. <i>Spartothamnella puberula</i>      | 1.52  | 1.17  | 0.65  |                         |
| 251. <i>Stipa spartea</i>                 | 1.04  | 0.69  | 0.17  |                         |
| 252. <i>Stirlingia latifolia</i>          | 0.86  | 0.51  | -0.01 |                         |
| 253. <i>Syncarpia glomulifera</i>         | 0.79  | 0.44  | -0.08 |                         |

|                                      |      |      |       |                       |
|--------------------------------------|------|------|-------|-----------------------|
| 254. <i>Synoum glandulosum</i>       | 0.96 | 0.61 | 0.09  |                       |
| 255. <i>Taxodium distichum</i>       | 1.01 | 0.66 | 0.14  |                       |
| 256. <i>Thalassodendron ciliatum</i> |      |      | 0.03  | Titlyanov et al. 1992 |
| 257. <i>Tilia americana</i>          | 1.02 | 0.67 | 0.15  |                       |
| 258. <i>Trema tomentosa</i>          | 1.25 | 0.90 | 0.38  |                       |
| 259. <i>Triodia scabra</i>           | 0.91 | 0.56 | 0.04  |                       |
| 260. <i>Tsuga canadensis</i>         | 0.49 | 0.14 | -0.38 |                       |
| 261. <i>Urera caracasana</i>         | 1.46 | 1.11 | 0.59  |                       |
| 262. <i>Vaccinium arboreum</i>       | 0.81 | 0.46 | -0.06 |                       |
| 263. <i>Vaccinium corymbosum</i>     | 1.10 | 0.75 | 0.23  |                       |
| 264. <i>Vaccinium myrtillus</i>      | 1.03 | 0.68 | 0.16  |                       |
| 265. <i>Veratrum parviflorum</i>     | 1.27 | 0.92 | 0.40  |                       |
| 266. <i>Verticordia nitens</i>       | 0.78 | 0.43 | -0.09 |                       |
| 267. <i>Vismia japurensis</i>        | 0.97 | 0.62 | 0.10  |                       |
| 268. <i>Vismia lauriformis</i>       | 1.04 | 0.69 | 0.17  |                       |
| 269. <i>Weinmannia trichosperma</i>  |      |      | 0.18  | Lusk & del Pozo 2002  |
| 270. <i>Xanthorrhoea preissii</i>    | 0.49 | 0.14 | -0.38 |                       |
| 271. <i>Xylomelum pyriforme</i>      | 0.59 | 0.24 | -0.28 |                       |

#### Additional references to Table S10:

- Feng Y.-L., Cao K.-F., Zhang J.-L. (2004) Photosynthetic characteristics, dark respiration, and leaf mass per unit area in seedlings of four tropical tree species grown under three irradiances. *Photosynthetica* 42: 431-437.
- Hamilton J.G., Thomas R.B., Delucia E.H. (2001) Direct and indirect effects of elevated CO<sub>2</sub> on leaf respiration in a forest ecosystem. *Plant, Cell and Environment* 24: 975-982.
- Lusk C.H., del Pozo A. (2002) Survival and growth of seedlings of 12 Chilean rainforest trees in two light environments: gas exchange and biomass distribution correlates. *Austral Ecology* 27: 173-182.
- Mark A.F. (1975) Photosynthesis and dark respiration in three alpine snow tussocks (*Chionochoa* spp.) Under Controlled Environments. *New Zealand Journal of Botany* 13: 93-122.
- Menendez M., Sanchez A. (1998) Seasonal variations in P-I responses of *Chara hispida* L. and *Potamogeton pectinatus* L. from stream mediterranean ponds. *Aquatic Botany* 61: 1-15.
- Ryan M.G., Linder S., Vose J.M., Hubbard R.M. (1994) Dark respiration of pines. *Ecological Bulletins* 43: 50-63.
- Titlyanov E.A., Leletkin V.A., Bil' K.Y., Kolmakov P.V., Nechai E.G. (1992) Light and temperature dependence of oxygen exchange, carbon assimilation and primary production in *Thalassodendron ciliatum* blades. *Atoll Research Bulletin* No. 375, Chapter 11, National Museum of Natural History, Smithsonian Institution, Washington D.C., USA, pp. 1-20.
- Ullrich-Eberius C.I., Novacky A., Fischer E., Lüttge U. (1981) Relationship between energy-dependent phosphate uptake and the electrical membrane potential in *Lemna gibba* G1. *Plant Physiology* 67: 797-801.
