# Supplementary material
Source: PubMed Central journal article supplement (PMC2579366)
Supplement: 0802148105_DS11_PDF.pdf [file 0802148105_DS11_PDF.pdf]

## Dataset S11. Dark respiration rates in seedlings and saplings of vascular plants

### Notes to Table S11:

Dark respiration rates of whole vascular plants (seedlings and tree saplings) are taken from the work of Reich, P. B., Tjoelker, M. G., Machado, J.-L. & Oleksyn, J. Universal scaling of respiratory metabolism, size and nitrogen in plants. *Nature* 439, 457–461 (2006).

"Organism" — designation of the group to which the studied individual belongs as described in Reich et al. (2006);

"LogDMg" — decimal logarithm of whole plant dry mass DM, g;

"LogNMg" — decimal logarithm of whole plant nitrogen mass NMg, g;

"LogQd" — decimal logarithm of whole plant dark respiration Qd, nmol CO<sub>2</sub> s<sup>-1</sup>, at 24 °C;

"LogqWkg" — decimal logarithm of whole plant dark respiration in W (kg wet mass)<sup>-1</sup>, converted from Qd/DMg using respiratory quotient of unity (1 mol CO<sub>2</sub> released = 1 mol O<sub>2</sub> consumed), energy conversion 1 ml O<sub>2</sub> = 20 J and DM/WM (dry mass to wet mass ratio) = 0.3 (SI Methods, Table S12a);

"Logq25Wkg" — decimal logarithm of dark respiration rate converted to 25 °C using Q10 = 2,  $q_{25Wkg} = q_{Wkg} \times Q_{10}^{(25 - 24)/10}$ .

See Reich et al. (2006) for details of this data base.

Table S11.

| Organism       | Lab/field | Seedling/<br>Sapling | LogDMg      | LogqWkg | Logq25Wkg | LogQd       | LogNMg      |
|----------------|-----------|----------------------|-------------|---------|-----------|-------------|-------------|
| 1. 9speciesGH  | lab       | Seedling             | -2.11492162 | 0.654   | 0.685     | -0.59127355 | -3.41943994 |
| 2. 9speciesGH  | lab       | Seedling             | -2.03151705 | 0.506   | 0.537     | -0.65557661 | -3.47041567 |
| 3. 9speciesGH  | lab       | Seedling             | -1.83713701 | 0.665   | 0.696     | -0.30223692 | -3.464225   |
| 4. 9speciesGH  | lab       | Seedling             | -1.79048499 | 0.392   | 0.423     | -0.52858176 | -3.14212497 |
| 5. 9speciesGH  | lab       | Seedling             | -1.70333481 | 0.356   | 0.387     | -0.47737077 | -3.22476831 |
| 6. 9speciesGH  | lab       | Seedling             | -1.68193667 | 0.061   | 0.092     | -0.75095274 | -3.25380187 |
| 7. 9speciesGH  | lab       | Seedling             | -1.67468963 | 0.547   | 0.578     | -0.25789094 | -3.02632962 |
| 8. 9speciesGH  | lab       | Seedling             | -1.65560773 | 0.548   | 0.579     | -0.23774719 | -3.00143118 |
| 9. 9speciesGH  | lab       | Seedling             | -1.64397414 | 0.535   | 0.566     | -0.23876391 | -2.9897976  |
| 10. 9speciesGH | lab       | Seedling             | -1.64397414 | 0.552   | 0.583     | -0.22181822 | -2.94849247 |
| 11. 9speciesGH | lab       | Seedling             | -1.61439373 | 0.086   | 0.117     | -0.6584135  | -3.2044606  |
| 12. 9speciesGH | lab       | Seedling             | -1.60730305 | 0.640   | 0.671     | -0.09771324 | -2.98096268 |
| 13. 9speciesGH | lab       | Seedling             | -1.58252831 | 0.167   | 0.198     | -0.54535481 | -3.14477774 |
| 14. 9speciesGH | lab       | Seedling             | -1.54287537 | 0.735   | 0.766     | 0.06210409  | -2.8473937  |
| 15. 9speciesGH | lab       | Seedling             | -1.4828041  | 0.236   | 0.267     | -0.37728039 | -3.07287098 |
| 16. 9speciesGH | lab       | Seedling             | -1.47886192 | 0.480   | 0.511     | -0.12842409 | -3.03638215 |
| 17. 9speciesGH | lab       | Seedling             | -1.47755577 | 0.219   | 0.250     | -0.38869971 | -3.02576933 |
| 18. 9speciesGH | lab       | Seedling             | -1.4710833  | 0.517   | 0.548     | -0.08428971 | -2.82272329 |
| 19. 9speciesGH | lab       | Seedling             | -1.46852108 | 0.510   | 0.541     | -0.08895892 | -3.079355   |
| 20. 9speciesGH | lab       | Seedling             | -1.44309473 | 0.172   | 0.203     | -0.40121433 | -3.01495994 |
| 21. 9speciesGH | lab       | Seedling             | -1.4424928  | 0.527   | 0.558     | -0.04587786 | -2.99070636 |
| 22. 9speciesGH | lab       | Seedling             | -1.38668684 | 0.347   | 0.378     | -0.16993324 | -2.81381524 |
| 23. 9speciesGH | lab       | Seedling             | -1.37830454 | 0.731   | 0.762     | 0.22306291  | -2.724128   |
| 24. 9speciesGH | lab       | Seedling             | -1.3580304  | 0.490   | 0.521     | 0.00235317  | -2.91555063 |
| 25. 9speciesGH | lab       | Seedling             | -1.33068312 | 0.179   | 0.210     | -0.28122492 | -2.90254833 |
| 26. 9speciesGH | lab       | Seedling             | -1.326058   | 0.427   | 0.458     | -0.02890524 | -2.88357823 |
| 27. 9speciesGH | lab       | Seedling             | -1.31740371 | 0.651   | 0.682     | 0.20342265  | -2.69106334 |
| 28. 9speciesGH | lab       | Seedling             | -1.29670862 | 0.210   | 0.241     | -0.21635533 | -2.85895806 |

|     |            |     |          |             |        |        |             |             |
|-----|------------|-----|----------|-------------|--------|--------|-------------|-------------|
| 29. | 9speciesGH | lab | Seedling | -1.27245874 | -0.088 | -0.057 | -0.4905511  |             |
| 30. | 9speciesGH | lab | Seedling | -1.26841123 | 0.417  | 0.448  | 0.01850373  | -2.8166248  |
| 31. | 9speciesGH | lab | Seedling | -1.24795155 | 0.668  | 0.699  | 0.2897444   |             |
| 32. | 9speciesGH | lab | Seedling | -1.24641694 | 0.359  | 0.390  | -0.01720775 | -2.67354534 |
| 33. | 9speciesGH | lab | Seedling | -1.23882419 | 0.365  | 0.396  | -0.00361166 |             |
| 34. | 9speciesGH | lab | Seedling | -1.23844801 | 0.507  | 0.538  | 0.13898247  | -2.81193675 |
| 35. | 9speciesGH | lab | Seedling | -1.23582387 | 0.570  | 0.601  | 0.20381927  | -2.78403743 |
| 36. | 9speciesGH | lab | Seedling | -1.23545028 | 0.454  | 0.485  | 0.08901859  | -2.79769972 |
| 37. | 9speciesGH | lab | Seedling | -1.22914799 | 0.202  | 0.233  | -0.15677624 | -2.85075009 |
| 38. | 9speciesGH | lab | Seedling | -1.22767829 | 0.415  | 0.446  | 0.05756739  | -2.78992773 |
| 39. | 9speciesGH | lab | Seedling | -1.22548303 | 0.187  | 0.218  | -0.16823196 | -2.65261143 |
| 40. | 9speciesGH | lab | Seedling | -1.22184875 | 0.516  | 0.547  | 0.16405003  | -2.59550838 |
| 41. | 9speciesGH | lab | Seedling | -1.21681131 | 0.268  | 0.299  | -0.07901018 | -2.64393971 |
| 42. | 9speciesGH | lab | Seedling | -1.21112488 | 0.518  | 0.549  | 0.17679226  | -2.58478452 |
| 43. | 9speciesGH | lab | Seedling | -1.17619985 | 0.361  | 0.392  | 0.05460618  | -2.74968858 |
| 44. | 9speciesGH | lab | Seedling | -1.17230771 | 0.184  | 0.215  | -0.11846308 | -2.81057988 |
| 45. | 9speciesGH | lab | Seedling | -1.1697322  | 0.179  | 0.210  | -0.1208239  | -2.80800436 |
| 46. | 9speciesGH | lab | Seedling | -1.12784373 | 0.500  | 0.531  | 0.24179694  |             |
| 47. | 9speciesGH | lab | Seedling | -1.11918641 | 0.394  | 0.425  | 0.1445964   | -2.58389229 |
| 48. | 9speciesGH | lab | Seedling | -1.11662251 | 0.324  | 0.355  | 0.07696062  | -2.75489467 |
| 49. | 9speciesGH | lab | Seedling | -1.11153968 | 0.263  | 0.294  | 0.02150317  | -2.74981185 |
| 50. | 9speciesGH | lab | Seedling | -1.09151498 | 0.696  | 0.727  | 0.47472278  | -2.45402525 |
| 51. | 9speciesGH | lab | Seedling | -1.08354605 | 0.512  | 0.543  | 0.29806678  | -2.54825193 |
| 52. | 9speciesGH | lab | Seedling | -1.079355   | 0.165  | 0.196  | -0.04388578 | -2.54406088 |
| 53. | 9speciesGH | lab | Seedling | -1.0639892  | 0.602  | 0.633  | 0.40819904  | -2.49696284 |
| 54. | 9speciesGH | lab | Seedling | -1.05256628 | 0.706  | 0.737  | 0.52330929  | -2.52881981 |
| 55. | 9speciesGH | lab | Seedling | -1.0501223  | 0.346  | 0.377  | 0.16636893  |             |
| 56. | 9speciesGH | lab | Seedling | -1.03857891 | 0.388  | 0.419  | 0.21904618  | -2.50328479 |
| 57. | 9speciesGH | lab | Seedling | -1.03778856 | 0.201  | 0.232  | 0.03277438  | -2.57092094 |
| 58. | 9speciesGH | lab | Seedling | -1.03464149 | 0.158  | 0.189  | -0.00686165 | -2.56777387 |
| 59. | 9speciesGH | lab | Seedling | -1.02159121 | 0.389  | 0.420  | 0.23718865  | -2.67523823 |
| 60. | 9speciesGH | lab | Seedling | -1.00833099 | 0.388  | 0.419  | 0.24942049  | -2.58181973 |
| 61. | 9speciesGH | lab | Seedling | -1.0015227  | 0.455  | 0.486  | 0.32387073  | -2.65516972 |
| 62. | 9speciesGH | lab | Seedling | -0.99934905 | 0.399  | 0.430  | 0.26969792  | -2.56001635 |
| 63. | 9speciesGH | lab | Seedling | -0.98927613 | 0.247  | 0.278  | 0.12750387  | -2.52240851 |
| 64. | 9speciesGH | lab | Seedling | -0.986952   | 0.430  | 0.461  | 0.31289544  | -2.56044074 |
| 65. | 9speciesGH | lab | Seedling | -0.97819072 | 0.549  | 0.580  | 0.44064929  | -2.52640429 |
| 66. | 9speciesGH | lab | Seedling | -0.97819072 | 0.597  | 0.628  | 0.48864194  |             |
| 67. | 9speciesGH | lab | Seedling | -0.97305837 | 0.512  | 0.543  | 0.40943524  |             |
| 68. | 9speciesGH | lab | Seedling | -0.96517108 | 0.607  | 0.638  | 0.51200214  | -2.41372109 |
| 69. | 9speciesGH | lab | Seedling | -0.96377046 | 0.452  | 0.483  | 0.35794523  |             |
| 70. | 9speciesGH | lab | Seedling | -0.95272513 | 0.726  | 0.757  | 0.64337597  | -2.48290312 |
| 71. | 9speciesGH | lab | Seedling | -0.93930216 | 0.542  | 0.573  | 0.47240992  | -2.48293613 |
| 72. | 9speciesGH | lab | Seedling | -0.93685436 | 0.436  | 0.467  | 0.36895867  | -2.59050139 |
| 73. | 9speciesGH | lab | Seedling | -0.92996213 | 0.573  | 0.604  | 0.51337431  | -2.32465709 |
| 74. | 9speciesGH | lab | Seedling | -0.92811799 | 0.378  | 0.409  | 0.31972063  |             |
| 75. | 9speciesGH | lab | Seedling | -0.91703521 | 0.345  | 0.376  | 0.29821519  |             |
| 76. | 9speciesGH | lab | Seedling | -0.90135627 | 0.110  | 0.141  | 0.0784276   | -2.53028841 |
| 77. | 9speciesGH | lab | Seedling | -0.89414933 | 0.204  | 0.235  | 0.1794889   |             |
| 78. | 9speciesGH | lab | Seedling | -0.89211197 | 0.689  | 0.720  | 0.66671147  |             |
| 79. | 9speciesGH | lab | Seedling | -0.88322627 | 0.438  | 0.469  | 0.4249101   | -2.41340426 |
| 80. | 9speciesGH | lab | Seedling | -0.87778412 | 0.189  | 0.220  | 0.1813797   | -2.5639169  |
| 81. | 9speciesGH | lab | Seedling | -0.87305728 | 0.600  | 0.631  | 0.5974059   | -2.30603092 |
| 82. | 9speciesGH | lab | Seedling | -0.8711163  | 0.334  | 0.365  | 0.33283072  | -2.55724908 |
| 83. | 9speciesGH | lab | Seedling | -0.85949196 | 0.296  | 0.327  | 0.30698231  | -2.54562474 |
| 84. | 9speciesGH | lab | Seedling | -0.85356186 | 0.647  | 0.678  | 0.663663    |             |
| 85. | 9speciesGH | lab | Seedling | -0.84924356 | 0.198  | 0.229  | 0.21920565  | -2.38237594 |
| 86. | 9speciesGH | lab | Seedling | -0.84103474 | 0.312  | 0.343  | 0.34049637  | -2.37121272 |

|      |            |     |          |             |       |       |            |             |
|------|------------|-----|----------|-------------|-------|-------|------------|-------------|
| 87.  | 9speciesGH | lab | Seedling | -0.80548566 | 0.765 | 0.796 | 0.82959025 |             |
| 88.  | 9speciesGH | lab | Seedling | -0.80465394 | 0.550 | 0.581 | 0.61581204 | -2.35286751 |
| 89.  | 9speciesGH | lab | Seedling | -0.78648224 | 0.482 | 0.513 | 0.56519937 | -2.20784303 |
| 90.  | 9speciesGH | lab | Seedling | -0.77910775 | 0.276 | 0.307 | 0.36664078 | -2.46524053 |
| 91.  | 9speciesGH | lab | Seedling | -0.77481999 | 0.645 | 0.676 | 0.74057044 |             |
| 92.  | 9speciesGH | lab | Seedling | -0.77237035 | 0.398 | 0.429 | 0.49573596 | -2.30254833 |
| 93.  | 9speciesGH | lab | Seedling | -0.76095091 | 0.694 | 0.725 | 0.80324373 | -2.23720444 |
| 94.  | 9speciesGH | lab | Seedling | -0.75808015 | 0.649 | 0.680 | 0.76062054 | -2.20663015 |
| 95.  | 9speciesGH | lab | Seedling | -0.73992861 | 0.452 | 0.483 | 0.58246759 | -2.28356258 |
| 96.  | 9speciesGH | lab | Seedling | -0.72170379 | 0.326 | 0.357 | 0.47465283 | -2.3994845  |
| 97.  | 9speciesGH | lab | Seedling | -0.72010502 | 0.349 | 0.380 | 0.49884813 | -2.4552872  |
| 98.  | 9speciesGH | lab | Seedling | -0.70929776 | 0.465 | 0.496 | 0.62582601 | -2.33638575 |
| 99.  | 9speciesGH | lab | Seedling | -0.70071067 | 0.569 | 0.600 | 0.73821748 |             |
| 100. | 9speciesGH | lab | Seedling | -0.68486968 | 0.697 | 0.728 | 0.88177544 | -2.04737995 |
| 101. | 9speciesGH | lab | Seedling | -0.68455448 | 0.627 | 0.658 | 0.81276009 | -2.31164248 |
| 102. | 9speciesGH | lab | Seedling | -0.68402965 | 0.468 | 0.499 | 0.65404968 | -2.22766362 |
| 103. | 9speciesGH | lab | Seedling | -0.68235446 | 0.541 | 0.572 | 0.72894653 |             |
| 104. | 9speciesGH | lab | Seedling | -0.64781748 | 0.306 | 0.337 | 0.52769094 | -2.27674962 |
| 105. | 9speciesGH | lab | Seedling | -0.64653259 | 0.315 | 0.346 | 0.53846725 | -2.38171476 |
| 106. | 9speciesGH | lab | Seedling | -0.62333181 | 0.259 | 0.290 | 0.50568184 | -2.30111252 |
| 107. | 9speciesGH | lab | Seedling | -0.60730305 | 0.400 | 0.431 | 0.66293084 | -2.34248522 |
| 108. | 9speciesGH | lab | Seedling | -0.59808275 | 0.242 | 0.273 | 0.51363214 | -2.27586345 |
| 109. | 9speciesGH | lab | Seedling | -0.5866164  | 0.599 | 0.630 | 0.8824728  |             |
| 110. | 9speciesGH | lab | Seedling | -0.58269442 | 0.614 | 0.645 | 0.9016204  | -2.05894795 |
| 111. | 9speciesGH | lab | Seedling | -0.58004425 | 0.316 | 0.347 | 0.60574966 | -2.31522643 |
| 112. | 9speciesGH | lab | Seedling | -0.51074483 | 0.522 | 0.553 | 0.88167063 | -2.12335501 |
| 113. | 9speciesGH | lab | Seedling | -0.50675113 | 0.600 | 0.631 | 0.96361639 | -2.13383913 |
| 114. | 9speciesGH | lab | Seedling | -0.49825627 | 0.530 | 0.561 | 0.90198872 | -2.11086644 |
| 115. | 9speciesGH | lab | Seedling | -0.41566878 | 0.557 | 0.588 | 1.01114576 | -2.02827895 |
| 116. | 9speciesGH | lab | Seedling | -0.40285351 | 0.690 | 0.721 | 1.15670058 | -1.93896052 |
| 117. | 9speciesGH | lab | Seedling | -0.39577395 | 0.508 | 0.539 | 0.98175349 | -2.03974809 |
| 118. | 9speciesGH | lab | Seedling | -0.37960365 | 0.618 | 0.649 | 1.10825289 | -2.00669165 |
| 119. | 9speciesGH | lab | Seedling | -0.37263414 | 0.586 | 0.617 | 1.08294951 | -1.79399493 |
| 120. | 9speciesGH | lab | Seedling | -0.36151074 | 0.568 | 0.599 | 1.07671791 | -1.97412092 |
| 121. | 9speciesGH | lab | Seedling | -0.35418488 | 0.698 | 0.729 | 1.21425723 |             |
| 122. | 9speciesGH | lab | Seedling | -0.33254705 | 0.393 | 0.424 | 0.93078237 | -1.727242   |
| 123. | 9speciesGH | lab | Seedling | -0.29379446 | 0.599 | 0.630 | 1.17515806 |             |
| 124. | 9speciesGH | lab | Seedling | -0.27511    | 0.785 | 0.816 | 1.37994387 | -1.86856982 |
| 125. | 9speciesGH | lab | Seedling | -0.24949161 | 0.607 | 0.638 | 1.2275249  | -1.64418656 |
| 126. | 9speciesGH | lab | Seedling | -0.21631076 | 0.617 | 0.648 | 1.27053232 | -1.66486077 |
| 127. | 9speciesGH | lab | Seedling | -0.21253953 | 0.305 | 0.336 | 0.96202542 | -1.85651367 |
| 128. | 9speciesGH | lab | Seedling | -0.20276709 | 0.663 | 0.694 | 1.33044983 | -1.79622691 |
| 129. | 9speciesGH | lab | Seedling | -0.1877553  | 0.487 | 0.518 | 1.16913513 | -1.83172945 |
| 130. | 9speciesGH | lab | Seedling | -0.18508682 | 0.601 | 0.632 | 1.28561339 | -1.60644761 |
| 131. | 9speciesGH | lab | Seedling | -0.1150065  | 0.641 | 0.672 | 1.3955971  | -1.70846632 |
| 132. | 9speciesGH | lab | Seedling | -0.07696333 | 0.583 | 0.614 | 1.37598768 | -1.61307034 |
| 133. | 9speciesGH | lab | Seedling | 0.0186381   | 0.651 | 0.682 | 1.53974614 | -1.57482172 |
| 134. | 9speciesGH | lab | Seedling | 0.01996742  | 0.666 | 0.697 | 1.55607927 | -1.55842865 |
| 135. | 9speciesGH | lab | Seedling | 0.04095817  | 0.548 | 0.579 | 1.4591865  | -1.49514884 |
| 136. | 9speciesGH | lab | Seedling | 0.11085896  | 0.614 | 0.645 | 1.59496034 | -1.46753712 |
| 137. | 9speciesGH | lab | Seedling | 0.1248953   | 0.469 | 0.500 | 1.46357681 | -1.41121171 |
| 138. | 9speciesGH | lab | Seedling | 0.13700578  | 0.565 | 0.596 | 1.57202423 | -1.4413903  |
| 139. | 9speciesGH | lab | Seedling | 0.16286299  | 0.304 | 0.335 | 1.33668443 | -1.54488094 |
| 140. | 9speciesGH | lab | Seedling | 0.21789173  | 0.509 | 0.540 | 1.59726783 | -1.36050435 |
| 141. | 9speciesGH | lab | Seedling | 0.26670197  | 0.470 | 0.501 | 1.60705217 |             |
| 142. | 9speciesGH | lab | Seedling | 0.34271869  | 0.390 | 0.421 | 1.6031299  |             |
| 143. | 9speciesGH | lab | Seedling | 0.37759763  | 0.525 | 0.556 | 1.77229729 |             |
| 144. | 9speciesGH | lab | Seedling | 0.38118731  | 0.519 | 0.550 | 1.77041612 |             |

|      |            |     |          |             |       |       |             |             |
|------|------------|-----|----------|-------------|-------|-------|-------------|-------------|
| 145. | 9speciesGH | lab | Seedling | 0.42084654  | 0.673 | 0.704 | 1.9634765   |             |
| 146. | 9speciesGH | lab | Seedling | 0.47026345  | 0.454 | 0.485 | 1.7940897   | -1.23748048 |
| 147. | 9speciesGH | lab | Seedling | 0.53576235  | 0.430 | 0.461 | 1.8362488   |             |
| 148. | 9speciesGH | lab | Seedling | 0.58629468  | 0.554 | 0.585 | 2.01037272  |             |
| 149. | 9speciesGH | lab | Seedling | 0.6404218   | 0.447 | 0.478 | 1.95709161  |             |
| 150. | 9speciesGH | lab | Seedling | 0.64819407  | 0.353 | 0.384 | 1.87108773  |             |
| 151. | 9speciesGH | lab | Seedling | 0.65705585  | 0.394 | 0.425 | 1.92099253  |             |
| 152. | 9speciesGH | lab | Seedling | 0.74264659  | 0.449 | 0.480 | 2.06209307  | -0.96509734 |
| 153. | 9speciesGH | lab | Seedling | 0.76826802  | 0.357 | 0.388 | 1.99514949  | -1.01424804 |
| 154. | 9speciesGH | lab | Seedling | 0.78653848  | 0.455 | 0.486 | 2.11197982  | -0.93016029 |
| 155. | 9speciesGH | lab | Seedling | 0.79427887  | 0.423 | 0.454 | 2.08747872  | -0.92241991 |
| 156. | 9speciesGH | lab | Seedling | 0.80848106  | 0.315 | 0.346 | 1.99336603  | -0.974035   |
| 157. | 9speciesGH | lab | Seedling | 0.83289194  | 0.383 | 0.414 | 2.08556949  | -0.88380683 |
| 158. | 9speciesGH | lab | Seedling | 0.83537345  | 0.281 | 0.312 | 1.98607161  | -0.9471426  |
| 159. | 9speciesGH | lab | Seedling | 0.86607457  | 0.412 | 0.443 | 2.14783756  | -0.8506242  |
| 160. | 9speciesGH | lab | Seedling | 0.87155542  | 0.379 | 0.410 | 2.12066637  | -0.83618851 |
| 161. | 9speciesGH | lab | Seedling | 0.92298482  | 0.297 | 0.328 | 2.08958834  | -0.85953124 |
| 162. | 9speciesGH | lab | Seedling | 0.96156346  | 0.280 | 0.311 | 2.11130565  | -0.83161066 |
| 163. | 9speciesGH | lab | Seedling | 0.98154681  | 0.273 | 0.304 | 2.12437085  | -0.81162732 |
| 164. | 9speciesGH | lab | Seedling | 1.03350417  | 0.378 | 0.409 | 2.2810345   | -0.75966995 |
| 165. | 9speciesGH | lab | Seedling | 1.11571034  | 0.385 | 0.416 | 2.37111728  | -0.67746379 |
| 166. | BorealGCB  | lab | Seedling | -1.84403676 | 0.787 | 0.818 | -0.1873045  |             |
| 167. | BorealGCB  | lab | Seedling | -1.78059915 | 0.761 | 0.792 | -0.14950921 |             |
| 168. | BorealGCB  | lab | Seedling | -1.76848145 | 0.330 | 0.361 | -0.56871751 |             |
| 169. | BorealGCB  | lab | Seedling | -1.72515831 | 1.007 | 1.038 | 0.1515138   |             |
| 170. | BorealGCB  | lab | Seedling | -1.67177268 | 0.586 | 0.617 | -0.21562247 |             |
| 171. | BorealGCB  | lab | Seedling | -1.66672731 | 0.393 | 0.424 | -0.40390884 |             |
| 172. | BorealGCB  | lab | Seedling | -1.66409863 | 0.342 | 0.373 | -0.45222843 |             |
| 173. | BorealGCB  | lab | Seedling | -1.62836038 | 0.521 | 0.552 | -0.2374705  |             |
| 174. | BorealGCB  | lab | Seedling | -1.60221293 | 0.759 | 0.790 | 0.02657622  |             |
| 175. | BorealGCB  | lab | Seedling | -1.6016569  | 0.950 | 0.981 | 0.21846933  |             |
| 176. | BorealGCB  | lab | Seedling | -1.58861068 | 0.642 | 0.673 | -0.0764476  |             |
| 177. | BorealGCB  | lab | Seedling | -1.58719161 | 0.295 | 0.326 | -0.42259547 |             |
| 178. | BorealGCB  | lab | Seedling | -1.57383607 | 0.711 | 0.742 | 0.007529    |             |
| 179. | BorealGCB  | lab | Seedling | -1.55887627 | 0.356 | 0.387 | -0.33241796 |             |
| 180. | BorealGCB  | lab | Seedling | -1.54518674 | 0.373 | 0.404 | -0.30245844 |             |
| 181. | BorealGCB  | lab | Seedling | -1.5439263  | 0.317 | 0.348 | -0.35695663 |             |
| 182. | BorealGCB  | lab | Seedling | -1.53420337 | 0.642 | 0.673 | -0.02186812 |             |
| 183. | BorealGCB  | lab | Seedling | -1.45198735 | 0.640 | 0.671 | 0.05769425  |             |
| 184. | BorealGCB  | lab | Seedling | -1.44018042 | 0.568 | 0.599 | -0.00255182 |             |
| 185. | BorealGCB  | lab | Seedling | -1.43085616 | 0.650 | 0.681 | 0.08936966  |             |
| 186. | BorealGCB  | lab | Seedling | -1.4010724  | 0.700 | 0.731 | 0.16925447  |             |
| 187. | BorealGCB  | lab | Seedling | -1.3985619  | 0.642 | 0.673 | 0.11372711  |             |
| 188. | BorealGCB  | lab | Seedling | -1.3928738  | 0.570 | 0.601 | 0.04762384  |             |
| 189. | BorealGCB  | lab | Seedling | -1.3772967  | 0.727 | 0.758 | 0.21929648  |             |
| 190. | BorealGCB  | lab | Seedling | -1.36303744 | 0.490 | 0.521 | -0.00255412 |             |
| 191. | BorealGCB  | lab | Seedling | -1.35756484 | 0.331 | 0.362 | -0.15633302 |             |
| 192. | BorealGCB  | lab | Seedling | -1.34479543 | 0.402 | 0.433 | -0.07295616 |             |
| 193. | BorealGCB  | lab | Seedling | -1.33776748 | 0.341 | 0.372 | -0.12636596 |             |
| 194. | BorealGCB  | lab | Seedling | -1.33440507 | 0.548 | 0.579 | 0.08376197  |             |
| 195. | BorealGCB  | lab | Seedling | -1.304694   | 0.332 | 0.363 | -0.10288943 |             |
| 196. | BorealGCB  | lab | Seedling | -1.29663085 | 0.316 | 0.347 | -0.11057881 |             |
| 197. | BorealGCB  | lab | Seedling | -1.28504177 | 0.435 | 0.466 | 0.01976813  |             |
| 198. | BorealGCB  | lab | Seedling | -1.28362062 | 0.660 | 0.691 | 0.24649645  |             |
| 199. | BorealGCB  | lab | Seedling | -1.24202113 | 0.704 | 0.735 | 0.33241455  |             |
| 200. | BorealGCB  | lab | Seedling | -1.23913232 | 0.894 | 0.925 | 0.52473695  |             |
| 201. | BorealGCB  | lab | Seedling | -1.23337063 | 0.511 | 0.542 | 0.14788767  |             |
| 202. | BorealGCB  | lab | Seedling | -1.22151099 | 0.591 | 0.622 | 0.23965009  |             |

|      |           |     |          |             |       |       |            |
|------|-----------|-----|----------|-------------|-------|-------|------------|
| 203. | BorealGCB | lab | Seedling | -1.21886859 | 0.356 | 0.387 | 0.00752078 |
| 204. | BorealGCB | lab | Seedling | -1.2153766  | 0.365 | 0.396 | 0.0197505  |
| 205. | BorealGCB | lab | Seedling | -1.21483124 | 0.622 | 0.653 | 0.27728974 |
| 206. | BorealGCB | lab | Seedling | -1.20643051 | 0.495 | 0.526 | 0.1581039  |
| 207. | BorealGCB | lab | Seedling | -1.19675558 | 0.417 | 0.448 | 0.09020601 |
| 208. | BorealGCB | lab | Seedling | -1.19240145 | 0.631 | 0.662 | 0.30869797 |
| 209. | BorealGCB | lab | Seedling | -1.18267596 | 0.604 | 0.635 | 0.29153176 |
| 210. | BorealGCB | lab | Seedling | -1.1486706  | 0.551 | 0.582 | 0.27281959 |
| 211. | BorealGCB | lab | Seedling | -1.1451127  | 1.140 | 1.171 | 0.86473202 |
| 212. | BorealGCB | lab | Seedling | -1.11614819 | 0.478 | 0.509 | 0.23152874 |
| 213. | BorealGCB | lab | Seedling | -1.11132107 | 0.541 | 0.572 | 0.29968373 |
| 214. | BorealGCB | lab | Seedling | -1.09748161 | 0.459 | 0.490 | 0.23153083 |
| 215. | BorealGCB | lab | Seedling | -1.07562789 | 0.225 | 0.256 | 0.01976287 |
| 216. | BorealGCB | lab | Seedling | -1.06651571 | 0.276 | 0.307 | 0.07975732 |
| 217. | BorealGCB | lab | Seedling | -1.06314129 | 1.044 | 1.075 | 0.85048849 |
| 218. | BorealGCB | lab | Seedling | -1.06013766 | 0.608 | 0.639 | 0.41770058 |
| 219. | BorealGCB | lab | Seedling | -1.05559018 | 0.608 | 0.639 | 0.42258083 |
| 220. | BorealGCB | lab | Seedling | -1.05406257 | 0.527 | 0.558 | 0.34340627 |
| 221. | BorealGCB | lab | Seedling | -1.03779123 | 0.657 | 0.688 | 0.48951588 |
| 222. | BorealGCB | lab | Seedling | -1.02680859 | 0.662 | 0.693 | 0.504779   |
| 223. | BorealGCB | lab | Seedling | -1.01437529 | 0.602 | 0.633 | 0.45735259 |
| 224. | BorealGCB | lab | Seedling | -1.01287185 | 0.479 | 0.510 | 0.33658535 |
| 225. | BorealGCB | lab | Seedling | -1.00991495 | 0.445 | 0.476 | 0.30532163 |
| 226. | BorealGCB | lab | Seedling | -0.96258474 | 0.597 | 0.628 | 0.50477364 |
| 227. | BorealGCB | lab | Seedling | -0.9561018  | 0.415 | 0.446 | 0.32876669 |
| 228. | BorealGCB | lab | Seedling | -0.94918741 | 0.416 | 0.447 | 0.33657998 |
| 229. | BorealGCB | lab | Seedling | -0.94497292 | 0.796 | 0.827 | 0.72102624 |
| 230. | BorealGCB | lab | Seedling | -0.93468932 | 0.572 | 0.603 | 0.50773417 |
| 231. | BorealGCB | lab | Seedling | -0.93318242 | 0.898 | 0.929 | 0.83476141 |
| 232. | BorealGCB | lab | Seedling | -0.91832236 | 0.867 | 0.898 | 0.81913263 |
| 233. | BorealGCB | lab | Seedling | -0.8977889  | 0.519 | 0.550 | 0.49080056 |
| 234. | BorealGCB | lab | Seedling | -0.89276692 | 0.608 | 0.639 | 0.58549108 |
| 235. | BorealGCB | lab | Seedling | -0.87104183 | 0.353 | 0.384 | 0.351833   |
| 236. | BorealGCB | lab | Seedling | -0.86542793 | 0.416 | 0.447 | 0.42091628 |
| 237. | BorealGCB | lab | Seedling | -0.86154295 | 0.415 | 0.446 | 0.42341477 |
| 238. | BorealGCB | lab | Seedling | -0.8558831  | 0.485 | 0.516 | 0.49913315 |
| 239. | BorealGCB | lab | Seedling | -0.85563762 | 0.322 | 0.353 | 0.33658769 |
| 240. | BorealGCB | lab | Seedling | -0.85409369 | 0.570 | 0.601 | 0.58549608 |
| 241. | BorealGCB | lab | Seedling | -0.85119334 | 0.220 | 0.251 | 0.23882543 |
| 242. | BorealGCB | lab | Seedling | -0.77836583 | 0.219 | 0.250 | 0.31032546 |
| 243. | BorealGCB | lab | Seedling | -0.77731375 | 0.842 | 0.873 | 0.93445919 |
| 244. | BorealGCB | lab | Seedling | -0.75782616 | 0.357 | 0.388 | 0.46920928 |
| 245. | BorealGCB | lab | Seedling | -0.75560881 | 0.401 | 0.432 | 0.51576116 |
| 246. | BorealGCB | lab | Seedling | -0.74470611 | 0.688 | 0.719 | 0.81323205 |
| 247. | BorealGCB | lab | Seedling | -0.72853243 | 0.508 | 0.539 | 0.6490732  |
| 248. | BorealGCB | lab | Seedling | -0.72044603 | 0.558 | 0.589 | 0.70725857 |
| 249. | BorealGCB | lab | Seedling | -0.71149659 | 0.865 | 0.896 | 1.02325486 |
| 250. | BorealGCB | lab | Seedling | -0.69303245 | 0.566 | 0.597 | 0.74312403 |
| 251. | BorealGCB | lab | Seedling | -0.6876188  | 0.222 | 0.253 | 0.40434523 |
| 252. | BorealGCB | lab | Seedling | -0.68004783 | 0.266 | 0.297 | 0.45588991 |
| 253. | BorealGCB | lab | Seedling | -0.67295083 | 0.345 | 0.376 | 0.54173234 |
| 254. | BorealGCB | lab | Seedling | -0.66490317 | 0.623 | 0.654 | 0.82770751 |
| 255. | BorealGCB | lab | Seedling | -0.65598682 | 0.783 | 0.814 | 0.9966189  |
| 256. | BorealGCB | lab | Seedling | -0.62388197 | 0.737 | 0.768 | 0.98315951 |
| 257. | BorealGCB | lab | Seedling | -0.619392   | 0.779 | 0.810 | 1.03004013 |
| 258. | BorealGCB | lab | Seedling | -0.60506099 | 0.698 | 0.729 | 0.96340563 |
| 259. | BorealGCB | lab | Seedling | -0.59716811 | 0.508 | 0.539 | 0.7804654  |
| 260. | BorealGCB | lab | Seedling | -0.58342939 | 1.035 | 1.066 | 1.32197256 |

|      |           |     |          |             |       |       |            |
|------|-----------|-----|----------|-------------|-------|-------|------------|
| 261. | BorealGCB | lab | Seedling | -0.56451332 | 0.990 | 1.021 | 1.2954292  |
| 262. | BorealGCB | lab | Seedling | -0.55450431 | 0.564 | 0.595 | 0.87935624 |
| 263. | BorealGCB | lab | Seedling | -0.53712313 | 0.595 | 0.626 | 0.92758629 |
| 264. | BorealGCB | lab | Seedling | -0.52148327 | 0.840 | 0.871 | 1.18806668 |
| 265. | BorealGCB | lab | Seedling | -0.51493472 | 0.591 | 0.622 | 0.94630375 |
| 266. | BorealGCB | lab | Seedling | -0.51180304 | 0.528 | 0.559 | 0.88654837 |
| 267. | BorealGCB | lab | Seedling | -0.50631129 | 0.348 | 0.379 | 0.71191717 |
| 268. | BorealGCB | lab | Seedling | -0.49231292 | 0.492 | 0.523 | 0.87005286 |
| 269. | BorealGCB | lab | Seedling | -0.48575539 | 0.455 | 0.486 | 0.8397261  |
| 270. | BorealGCB | lab | Seedling | -0.48178542 | 0.525 | 0.556 | 0.91349033 |
| 271. | BorealGCB | lab | Seedling | -0.47866463 | 0.410 | 0.441 | 0.80138664 |
| 272. | BorealGCB | lab | Seedling | -0.43980771 | 0.499 | 0.530 | 0.92905433 |
| 273. | BorealGCB | lab | Seedling | -0.43630005 | 0.714 | 0.745 | 1.14758391 |
| 274. | BorealGCB | lab | Seedling | -0.41226878 | 0.650 | 0.681 | 1.10736827 |
| 275. | BorealGCB | lab | Seedling | -0.40528514 | 0.781 | 0.812 | 1.24577655 |
| 276. | BorealGCB | lab | Seedling | -0.3781909  | 0.425 | 0.456 | 0.91678012 |
| 277. | BorealGCB | lab | Seedling | -0.37246081 | 0.497 | 0.528 | 0.99466071 |
| 278. | BorealGCB | lab | Seedling | -0.36241444 | 0.315 | 0.346 | 0.82232498 |
| 279. | BorealGCB | lab | Seedling | -0.35988862 | 0.732 | 0.763 | 1.24219381 |
| 280. | BorealGCB | lab | Seedling | -0.34929569 | 0.336 | 0.367 | 0.85631722 |
| 281. | BorealGCB | lab | Seedling | -0.33034277 | 0.871 | 0.902 | 1.41032408 |
| 282. | BorealGCB | lab | Seedling | -0.3290384  | 0.324 | 0.355 | 0.8651546  |
| 283. | BorealGCB | lab | Seedling | -0.328787   | 0.516 | 0.547 | 1.05701208 |
| 284. | BorealGCB | lab | Seedling | -0.32266413 | 0.421 | 0.452 | 0.9679327  |
| 285. | BorealGCB | lab | Seedling | -0.31850943 | 0.574 | 0.605 | 1.12520498 |
| 286. | BorealGCB | lab | Seedling | -0.31289815 | 0.657 | 0.688 | 1.21446213 |
| 287. | BorealGCB | lab | Seedling | -0.30066118 | 0.538 | 0.569 | 1.10782139 |
| 288. | BorealGCB | lab | Seedling | -0.27096555 | 0.184 | 0.215 | 0.78285222 |
| 289. | BorealGCB | lab | Seedling | -0.26489466 | 0.602 | 0.633 | 1.20676908 |
| 290. | BorealGCB | lab | Seedling | -0.26354347 | 0.666 | 0.697 | 1.27234629 |
| 291. | BorealGCB | lab | Seedling | -0.26318304 | 0.454 | 0.485 | 1.06082192 |
| 292. | BorealGCB | lab | Seedling | -0.25062986 | 0.608 | 0.639 | 1.22728418 |
| 293. | BorealGCB | lab | Seedling | -0.2018346  | 0.522 | 0.553 | 1.1904114  |
| 294. | BorealGCB | lab | Seedling | -0.19017988 | 0.953 | 0.984 | 1.63252706 |
| 295. | BorealGCB | lab | Seedling | -0.16604827 | 0.814 | 0.845 | 1.51843467 |
| 296. | BorealGCB | lab | Seedling | -0.16427608 | 0.592 | 0.623 | 1.29808612 |
| 297. | BorealGCB | lab | Seedling | -0.14345577 | 0.608 | 0.639 | 1.33495174 |
| 298. | BorealGCB | lab | Seedling | -0.13061282 | 0.327 | 0.358 | 1.06668509 |
| 299. | BorealGCB | lab | Seedling | -0.1285124  | 0.438 | 0.469 | 1.17922759 |
| 300. | BorealGCB | lab | Seedling | -0.10944367 | 0.670 | 0.701 | 1.43006878 |
| 301. | BorealGCB | lab | Seedling | -0.07090378 | 0.629 | 0.660 | 1.42814163 |
| 302. | BorealGCB | lab | Seedling | -0.06968546 | 0.514 | 0.545 | 1.3138272  |
| 303. | BorealGCB | lab | Seedling | -0.05515017 | 0.350 | 0.381 | 1.16471123 |
| 304. | BorealGCB | lab | Seedling | -0.05488394 | 0.577 | 0.608 | 1.39169537 |
| 305. | BorealGCB | lab | Seedling | -0.04734293 | 0.638 | 0.669 | 1.46020932 |
| 306. | BorealGCB | lab | Seedling | -0.04504638 | 0.334 | 0.365 | 1.15934764 |
| 307. | BorealGCB | lab | Seedling | -0.0381635  | 0.671 | 0.702 | 1.50260061 |
| 308. | BorealGCB | lab | Seedling | -0.03274643 | 0.641 | 0.672 | 1.47817011 |
| 309. | BorealGCB | lab | Seedling | -0.0205024  | 0.482 | 0.513 | 1.33163955 |
| 310. | BorealGCB | lab | Seedling | -0.00445054 | 0.696 | 0.727 | 1.56125122 |
| 311. | BorealGCB | lab | Seedling | -0.00404341 | 0.613 | 0.644 | 1.47911719 |
| 312. | BorealGCB | lab | Seedling | 0.02884697  | 0.884 | 0.915 | 1.78246755 |
| 313. | BorealGCB | lab | Seedling | 0.03675267  | 0.484 | 0.515 | 1.39059703 |
| 314. | BorealGCB | lab | Seedling | 0.06018995  | 0.457 | 0.488 | 1.38679306 |
| 315. | BorealGCB | lab | Seedling | 0.06452976  | 0.438 | 0.469 | 1.3722207  |
| 316. | BorealGCB | lab | Seedling | 0.08102686  | 0.386 | 0.417 | 1.3374924  |
| 317. | BorealGCB | lab | Seedling | 0.08214706  | 0.850 | 0.881 | 1.80188497 |
| 318. | BorealGCB | lab | Seedling | 0.08235887  | 0.346 | 0.377 | 1.29788408 |

|      |           |     |          |             |       |       |             |             |
|------|-----------|-----|----------|-------------|-------|-------|-------------|-------------|
| 319. | BorealGCB | lab | Seedling | 0.08995837  | 0.551 | 0.582 | 1.51057816  |             |
| 320. | BorealGCB | lab | Seedling | 0.09221892  | 0.751 | 0.782 | 1.71325214  |             |
| 321. | BorealGCB | lab | Seedling | 0.09887785  | 0.337 | 0.368 | 1.30540584  |             |
| 322. | BorealGCB | lab | Seedling | 0.10082294  | 0.593 | 0.624 | 1.56346004  |             |
| 323. | BorealGCB | lab | Seedling | 0.16304246  | 0.803 | 0.834 | 1.83636978  |             |
| 324. | BorealGCB | lab | Seedling | 0.17958787  | 0.508 | 0.539 | 1.55785895  |             |
| 325. | BorealGCB | lab | Seedling | 0.1816836   | 0.769 | 0.800 | 1.82020097  |             |
| 326. | BorealGCB | lab | Seedling | 0.2217474   | 0.450 | 0.481 | 1.54130522  |             |
| 327. | BorealGCB | lab | Seedling | 0.27432198  | 0.467 | 0.498 | 1.61131588  |             |
| 328. | BorealGCB | lab | Seedling | 0.29643481  | 0.464 | 0.495 | 1.6302515   |             |
| 329. | BorealGCB | lab | Seedling | 0.30078273  | 0.303 | 0.334 | 1.47366771  |             |
| 330. | BorealGCB | lab | Seedling | 0.32065762  | 0.367 | 0.398 | 1.55755997  |             |
| 331. | BorealGCB | lab | Seedling | 0.32200405  | 0.838 | 0.869 | 2.03037243  |             |
| 332. | BorealGCB | lab | Seedling | 0.3515702   | 0.351 | 0.382 | 1.57231685  |             |
| 333. | BorealGCB | lab | Seedling | 0.37020161  | 0.536 | 0.567 | 1.77640871  |             |
| 334. | BorealGCB | lab | Seedling | 0.42234141  | 0.491 | 0.522 | 1.78381874  |             |
| 335. | BorealGCB | lab | Seedling | 0.46713879  | 0.923 | 0.954 | 2.25993546  |             |
| 336. | BorealGCB | lab | Seedling | 0.47966737  | 0.795 | 0.826 | 2.14475283  |             |
| 337. | BorealGCB | lab | Seedling | 0.49567698  | 0.859 | 0.890 | 2.22475665  |             |
| 338. | BorealGCB | lab | Seedling | 0.5097555   | 0.578 | 0.609 | 1.95760313  |             |
| 339. | BorealGCB | lab | Seedling | 0.5276229   | 0.832 | 0.863 | 2.22982455  |             |
| 340. | BorealGCB | lab | Seedling | 0.53750975  | 0.400 | 0.431 | 1.80779008  |             |
| 341. | BorealGCB | lab | Seedling | 0.69488935  | 0.556 | 0.587 | 2.12113257  |             |
| 342. | BorealGCB | lab | Seedling | 0.73018523  | 0.599 | 0.630 | 2.19960229  |             |
| 343. | BorealGCB | lab | Seedling | 0.73380397  | 0.780 | 0.811 | 2.38426182  |             |
| 344. | BorealGCB | lab | Seedling | 0.75029967  | 0.830 | 0.861 | 2.44997641  |             |
| 345. | BorealGCB | lab | Seedling | 0.77139114  | 0.713 | 0.744 | 2.35391756  |             |
| 346. | BorealGCB | lab | Seedling | 0.78585503  | 0.862 | 0.893 | 2.5181878   |             |
| 347. | BorealGCB | lab | Seedling | 0.86344459  | 0.474 | 0.505 | 2.20744421  |             |
| 348. | BorealGCB | lab | Seedling | 0.89940405  | 0.546 | 0.577 | 2.31546143  |             |
| 349. | BorealGCB | lab | Seedling | 1.01911747  | 0.612 | 0.643 | 2.50155002  |             |
| 350. | BorealGCB | lab | Seedling | 1.05223447  | 0.416 | 0.447 | 2.33872079  |             |
| 351. | BorealGCB | lab | Seedling | 1.10244032  | 0.709 | 0.740 | 2.68142282  |             |
| 352. | BorealGCB | lab | Seedling | 1.16005351  | 0.779 | 0.810 | 2.80929901  |             |
| 353. | BorealGCB | lab | Seedling | 1.29503672  | 0.823 | 0.854 | 2.98770244  |             |
| 354. | BorealGCB | lab | Seedling | 1.31261932  | 0.584 | 0.615 | 2.76620319  |             |
| 355. | BorealGCB | lab | Seedling | 1.32923544  | 0.584 | 0.615 | 2.78281284  |             |
| 356. | GHherbs   | lab | Seedling | -1.89733766 | 0.681 | 0.712 | -0.34626093 | -3.35613434 |
| 357. | GHherbs   | lab | Seedling | -1.70626924 | 0.704 | 0.735 | -0.1318104  | -3.14986344 |
| 358. | GHherbs   | lab | Seedling | -1.68472957 | 0.629 | 0.660 | -0.18534056 | -3.0475583  |
| 359. | GHherbs   | lab | Seedling | -1.5426228  | 0.475 | 0.506 | -0.19795829 | -3.17726163 |
| 360. | GHherbs   | lab | Seedling | -1.52287875 | 0.622 | 0.653 | -0.03077177 | -3.14247591 |
| 361. | GHherbs   | lab | Seedling | -1.5039934  | 0.675 | 0.706 | 0.04146487  | -2.95301233 |
| 362. | GHherbs   | lab | Seedling | -1.45181539 | 0.649 | 0.680 | 0.06718787  | -3.06436504 |
| 363. | GHherbs   | lab | Seedling | -1.41453927 | 0.485 | 0.516 | -0.05992071 | -2.8942994  |
| 364. | GHherbs   | lab | Seedling | -1.33724217 | 0.735 | 0.766 | 0.26809868  | -2.85273815 |
| 365. | GHherbs   | lab | Seedling | -1.31875876 | 0.685 | 0.716 | 0.23657456  | -2.9697586  |
| 366. | GHherbs   | lab | Seedling | -1.29242982 | 0.426 | 0.457 | 0.00315031  | -2.91766142 |
| 367. | GHherbs   | lab | Seedling | -1.29242982 | 0.616 | 0.647 | 0.19371954  | -2.74218525 |
| 368. | GHherbs   | lab | Seedling | -1.28399666 | 0.747 | 0.778 | 0.33273033  | -2.70833825 |
| 369. | GHherbs   | lab | Seedling | -1.26760624 | 0.644 | 0.675 | 0.24654443  | -2.69930525 |
| 370. | GHherbs   | lab | Seedling | -1.26227741 | 0.504 | 0.535 | 0.11196978  | -2.89870882 |
| 371. | GHherbs   | lab | Seedling | -1.24667233 | 0.440 | 0.471 | 0.06304156  | -2.96489981 |
| 372. | GHherbs   | lab | Seedling | -1.16536739 | 0.684 | 0.715 | 0.38883856  | -2.48184823 |
| 373. | GHherbs   | lab | Seedling | -1.15697497 | 0.667 | 0.698 | 0.38036327  | -2.50482117 |
| 374. | GHherbs   | lab | Seedling | -1.14670748 | 0.729 | 0.760 | 0.45212556  | -2.58665247 |
| 375. | GHherbs   | lab | Seedling | -1.1426675  | 0.780 | 0.811 | 0.50734651  | -2.56106514 |
| 376. | GHherbs   | lab | Seedling | -1.11350927 | 0.698 | 0.729 | 0.45434044  | -2.43574677 |

|      |            |       |          |             |        |        |            |             |
|------|------------|-------|----------|-------------|--------|--------|------------|-------------|
| 377. | GHherbs    | lab   | Seedling | -1.10513034 | 0.613  | 0.644  | 0.37744317 | -2.62450481 |
| 378. | GHherbs    | lab   | Seedling | -1.08795517 | 0.467  | 0.498  | 0.24901408 | -2.77222349 |
| 379. | GHherbs    | lab   | Seedling | -1.06173052 | 0.540  | 0.571  | 0.34814342 | -2.53996549 |
| 380. | GHherbs    | lab   | Seedling | -1.03937069 | 0.726  | 0.757  | 0.55646463 | -2.54425132 |
| 381. | GHherbs    | lab   | Seedling | -1.02687215 | 0.598  | 0.629  | 0.44090669 | -2.45143844 |
| 382. | GHherbs    | lab   | Seedling | -0.98505965 | 0.582  | 0.613  | 0.46722996 | -2.35641636 |
| 383. | GHherbs    | lab   | Seedling | -0.94884748 | 0.532  | 0.563  | 0.45287308 | -2.45308922 |
| 384. | GHherbs    | lab   | Seedling | -0.93181414 | 0.585  | 0.616  | 0.52278741 | -2.48471243 |
| 385. | GHherbs    | lab   | Seedling | -0.91009489 | 0.565  | 0.596  | 0.52475963 | -2.50433135 |
| 386. | GHherbs    | lab   | Seedling | -0.90774735 | 0.800  | 0.831  | 0.762153   | -2.35467478 |
| 387. | GHherbs    | lab   | Seedling | -0.87397688 | 0.637  | 0.668  | 0.6332009  | -2.41912066 |
| 388. | GHherbs    | lab   | Seedling | -0.85490723 | 0.314  | 0.345  | 0.32906707 | -2.40994391 |
| 389. | GHherbs    | lab   | Seedling | -0.82102305 | 0.659  | 0.690  | 0.70776786 | -2.30460251 |
| 390. | GHherbs    | lab   | Seedling | -0.81530857 | 0.555  | 0.586  | 0.60974916 | -2.50355884 |
| 391. | GHherbs    | lab   | Seedling | -0.77469072 | 0.763  | 0.794  | 0.85873546 | -2.2941168  |
| 392. | GHherbs    | lab   | Seedling | -0.7721133  | 0.456  | 0.487  | 0.55389096 | -2.3377522  |
| 393. | GHherbs    | lab   | Seedling | -0.64717456 | 0.664  | 0.695  | 0.88633125 | -2.07308786 |
| 394. | GHherbs    | lab   | Seedling | -0.64589156 | 0.677  | 0.708  | 0.90077527 | -2.22806128 |
| 395. | GHherbs    | lab   | Seedling | -0.63953282 | 0.450  | 0.481  | 0.68037114 | -2.29929126 |
| 396. | GHherbs    | lab   | Seedling | -0.63638802 | 0.687  | 0.718  | 0.92067096 | -1.97328461 |
| 397. | GHherbs    | lab   | Seedling | -0.61261017 | 0.534  | 0.565  | 0.79171284 | -2.486155   |
| 398. | GHherbs    | lab   | Seedling | -0.59176003 | 0.571  | 0.602  | 0.84905272 | -2.35292147 |
| 399. | GHherbs    | lab   | Seedling | -0.55232526 | 0.498  | 0.529  | 0.81524463 | -1.99118964 |
| 400. | GHherbs    | lab   | Seedling | -0.537602   | 0.416  | 0.447  | 0.74834152 | -2.22436477 |
| 401. | GHherbs    | lab   | Seedling | -0.48017201 | 0.580  | 0.611  | 0.97026605 | -1.85786698 |
| 402. | GHherbs    | lab   | Seedling | -0.42365865 | 0.595  | 0.626  | 1.040991   | -1.97700649 |
| 403. | GHherbs    | lab   | Seedling | -0.2670704  | 0.342  | 0.373  | 0.94455601 | -2.03518811 |
| 404. | GHherbs    | lab   | Seedling | -0.25310644 | 0.582  | 0.613  | 1.19929655 | -1.67204128 |
| 405. | GHherbs    | lab   | Seedling | -0.24565166 | 0.577  | 0.608  | 1.20134919 | -1.67629463 |
| 406. | GHherbs    | lab   | Seedling | -0.21159592 | 0.548  | 0.579  | 1.20632452 | -1.73775661 |
| 407. | GHherbs    | lab   | Seedling | -0.14752001 | 0.926  | 0.957  | 1.64799402 | -1.66879187 |
| 408. | GHherbs    | lab   | Seedling | -0.14650459 | 0.575  | 0.606  | 1.29846634 | -1.64775361 |
| 409. | GHherbs    | lab   | Seedling | -0.1352912  | 0.436  | 0.467  | 1.17107435 | -1.92337997 |
| 410. | GHherbs    | lab   | Seedling | -0.10734897 | 0.596  | 0.627  | 1.35912029 | -1.53979109 |
| 411. | GHherbs    | lab   | Seedling | -0.05469558 | 0.593  | 0.624  | 1.40877765 | -1.47208243 |
| 412. | GHherbs    | lab   | Seedling | -0.04575749 | 0.512  | 0.543  | 1.33650842 | -1.51670342 |
| 413. | GHherbs    | lab   | Seedling | -0.04415196 | 0.640  | 0.671  | 1.46629003 | -1.53520334 |
| 414. | GHherbs    | lab   | Seedling | -0.00906946 | 0.512  | 0.543  | 1.37330382 | -1.42457741 |
| 415. | GHherbs    | lab   | Seedling | -0.0070049  | 0.335  | 0.366  | 1.19801538 | -1.71337809 |
| 416. | GHherbs    | lab   | Seedling | 0.0150802   | 0.632  | 0.663  | 1.51733768 | -1.48515853 |
| 417. | GHherbs    | lab   | Seedling | 0.16066857  | 0.420  | 0.451  | 1.45114694 | -1.39502301 |
| 418. | GHherbs    | lab   | Seedling | 0.16583762  | 0.590  | 0.621  | 1.62595724 | -1.26054702 |
| 419. | nMinnfield | field | Tree     | -0.13846559 | 0.351  | 0.382  | 1.08301055 | -2.12839788 |
|      |            |       | sapling  |             |        |        |            |             |
| 420. | nMinnfield | field | Tree     | 0.07664044  | -0.479 | -0.448 | 0.46779468 | -2.4481598  |
|      |            |       | sapling  |             |        |        |            |             |
| 421. | nMinnfield | field | Tree     | 0.09025805  | 0.230  | 0.261  | 1.18990311 | -1.89523983 |
|      |            |       | sapling  |             |        |        |            |             |
| 422. | nMinnfield | field | Tree     | 0.22993769  | 0.169  | 0.200  | 1.26908521 | -1.80894601 |
|      |            |       | sapling  |             |        |        |            |             |
| 423. | nMinnfield | field | Tree     | 0.27760921  | -0.714 | -0.683 | 0.43400413 | -1.98235686 |
|      |            |       | sapling  |             |        |        |            |             |
| 424. | nMinnfield | field | Tree     | 0.3354579   | -0.632 | -0.601 | 0.57368775 | -1.99749493 |
|      |            |       | sapling  |             |        |        |            |             |
| 425. | nMinnfield | field | Tree     | 0.3494718   | 0.081  | 0.112  | 1.300798   | -1.80152711 |
|      |            |       | sapling  |             |        |        |            |             |
| 426. | nMinnfield | field | Tree     | 0.44138088  | -0.265 | -0.234 | 1.04658562 | -1.8520085  |
|      |            |       | sapling  |             |        |        |            |             |
| 427. | nMinnfield | field | Tree     | 0.45453998  | -0.177 | -0.146 | 1.14776508 | -1.74881821 |
|      |            |       | sapling  |             |        |        |            |             |



|      |            |       |         |            |        |        |            |             |
|------|------------|-------|---------|------------|--------|--------|------------|-------------|
| 428. | nMinnfield | field | Tree    | 0.46893781 | -0.014 | 0.017  | 1.32460269 | -1.6302481  |
|      |            |       | sapling |            |        |        |            |             |
| 429. | nMinnfield | field | Tree    | 0.48444221 | -0.709 | -0.678 | 0.64514178 | -1.77128918 |
|      |            |       | sapling |            |        |        |            |             |
| 430. | nMinnfield | field | Tree    | 0.49803472 | -0.643 | -0.612 | 0.72468137 | -1.51655649 |
|      |            |       | sapling |            |        |        |            |             |
| 431. | nMinnfield | field | Tree    | 0.50920252 | -0.306 | -0.275 | 1.07278712 | -1.72510125 |
|      |            |       | sapling |            |        |        |            |             |
| 432. | nMinnfield | field | Tree    | 0.53832233 | -0.072 | -0.041 | 1.33603242 | -1.71113845 |
|      |            |       | sapling |            |        |        |            |             |
| 433. | nMinnfield | field | Tree    | 0.55606116 | -0.485 | -0.454 | 0.94111776 | -1.57088533 |
|      |            |       | sapling |            |        |        |            |             |
| 434. | nMinnfield | field | Tree    | 0.62695595 | -0.509 | -0.478 | 0.98821929 | -1.33178737 |
|      |            |       | sapling |            |        |        |            |             |
| 435. | nMinnfield | field | Tree    | 0.65494623 | -0.804 | -0.773 | 0.72097286 | -1.61314804 |
|      |            |       | sapling |            |        |        |            |             |
| 436. | nMinnfield | field | Tree    | 0.66398345 | -0.557 | -0.526 | 0.97668253 | -1.43201172 |
|      |            |       | sapling |            |        |        |            |             |
| 437. | nMinnfield | field | Tree    | 0.66670514 | -0.540 | -0.509 | 0.99695878 | -1.41413866 |
|      |            |       | sapling |            |        |        |            |             |
| 438. | nMinnfield | field | Tree    | 0.71054045 | -0.611 | -0.580 | 0.9695777  | -1.45489857 |
|      |            |       | sapling |            |        |        |            |             |
| 439. | nMinnfield | field | Tree    | 0.72574833 | 0.092  | 0.123  | 1.68758593 | -1.35641705 |
|      |            |       | sapling |            |        |        |            |             |
| 440. | nMinnfield | field | Tree    | 0.7451529  | -0.478 | -0.447 | 1.13677602 | -1.37328751 |
|      |            |       | sapling |            |        |        |            |             |
| 441. | nMinnfield | field | Tree    | 0.78753132 | -0.546 | -0.515 | 1.11124796 | -1.27229116 |
|      |            |       | sapling |            |        |        |            |             |
| 442. | nMinnfield | field | Tree    | 0.82432112 | -0.698 | -0.667 | 0.996032   | -1.48340395 |
|      |            |       | sapling |            |        |        |            |             |
| 443. | nMinnfield | field | Tree    | 0.83142182 | -0.526 | -0.495 | 1.17571271 | -1.46471031 |
|      |            |       | sapling |            |        |        |            |             |
| 444. | nMinnfield | field | Tree    | 0.84016885 | 0.116  | 0.147  | 1.82576217 | -1.17504284 |
|      |            |       | sapling |            |        |        |            |             |
| 445. | nMinnfield | field | Tree    | 0.84348194 | -0.698 | -0.667 | 1.01502714 | -1.2966725  |
|      |            |       | sapling |            |        |        |            |             |
| 446. | nMinnfield | field | Tree    | 0.86219103 | -0.449 | -0.418 | 1.28338239 | -1.28566865 |
|      |            |       | sapling |            |        |        |            |             |
| 447. | nMinnfield | field | Tree    | 0.86940775 | -0.729 | -0.698 | 1.01004702 | -1.23955429 |
|      |            |       | sapling |            |        |        |            |             |
| 448. | nMinnfield | field | Tree    | 0.87128097 | -0.316 | -0.285 | 1.42505617 | -1.28825463 |
|      |            |       | sapling |            |        |        |            |             |
| 449. | nMinnfield | field | Tree    | 0.8986155  | -0.301 | -0.270 | 1.46788743 | -1.4559605  |
|      |            |       | sapling |            |        |        |            |             |
| 450. | nMinnfield | field | Tree    | 0.89927319 | -0.097 | -0.066 | 1.67225762 | -1.31695386 |
|      |            |       | sapling |            |        |        |            |             |
| 451. | nMinnfield | field | Tree    | 0.91645395 | -0.546 | -0.515 | 1.24052888 | -1.35330109 |
|      |            |       | sapling |            |        |        |            |             |
| 452. | nMinnfield | field | Tree    | 0.94384063 | -0.480 | -0.449 | 1.33366366 | -1.24753974 |
|      |            |       | sapling |            |        |        |            |             |
| 453. | nMinnfield | field | Tree    | 0.96857634 | -0.586 | -0.555 | 1.25233056 | -1.208961   |
|      |            |       | sapling |            |        |        |            |             |
| 454. | nMinnfield | field | Tree    | 0.99153618 | -0.679 | -0.648 | 1.18225876 | -1.21041879 |
|      |            |       | sapling |            |        |        |            |             |
| 455. | nMinnfield | field | Tree    | 1.01456254 | -0.151 | -0.120 | 1.73356328 | -1.11970759 |
|      |            |       | sapling |            |        |        |            |             |
| 456. | nMinnfield | field | Tree    | 1.02234588 | -0.077 | -0.046 | 1.81561456 | -1.06166194 |
|      |            |       | sapling |            |        |        |            |             |
| 457. | nMinnfield | field | Tree    | 1.02358166 | -0.221 | -0.190 | 1.67225589 | -1.15135773 |
|      |            |       | sapling |            |        |        |            |             |
| 458. | nMinnfield | field | Tree    | 1.02362279 | -0.324 | -0.293 | 1.5701185  | -1.26519137 |
|      |            |       | sapling |            |        |        |            |             |
| 459. | nMinnfield | field | Tree    | 1.03790436 | -0.405 | -0.374 | 1.50262181 | -1.20677764 |

|      |            |       |                 |            |        |        |            |             |
|------|------------|-------|-----------------|------------|--------|--------|------------|-------------|
| 460. | nMinnfield | field | sapling<br>Tree | 1.09142073 | -0.482 | -0.451 | 1.47892316 | -1.25856947 |
| 461. | nMinnfield | field | sapling<br>Tree | 1.10533984 | -0.409 | -0.378 | 1.56681568 | -1.21648374 |
| 462. | nMinnfield | field | sapling<br>Tree | 1.12201917 | -0.231 | -0.200 | 1.76129579 | -1.15036073 |
| 463. | nMinnfield | field | sapling<br>Tree | 1.13798673 | -0.338 | -0.307 | 1.67008173 | -1.16363474 |
| 464. | nMinnfield | field | sapling<br>Tree | 1.15170686 | -0.419 | -0.388 | 1.60275779 |             |
| 465. | nMinnfield | field | sapling<br>Tree | 1.16654851 | -0.631 | -0.600 | 1.40587803 | -1.40008419 |
| 466. | nMinnfield | field | sapling<br>Tree | 1.21579613 | -0.720 | -0.689 | 1.36530463 | -1.12474699 |
| 467. | nMinnfield | field | sapling<br>Tree | 1.21848299 | -0.364 | -0.333 | 1.72403876 | -1.05251824 |
| 468. | nMinnfield | field | sapling<br>Tree | 1.23989982 | -0.521 | -0.490 | 1.58895585 | -0.87883655 |
| 469. | nMinnfield | field | sapling<br>Tree | 1.24578402 | -0.077 | -0.046 | 2.03861582 | -1.08675269 |
| 470. | nMinnfield | field | sapling<br>Tree | 1.26599637 | -0.371 | -0.340 | 1.76472393 | -1.0644222  |
| 471. | nMinnfield | field | sapling<br>Tree | 1.30567375 | -0.527 | -0.496 | 1.64872379 | -1.0111776  |
| 472. | nMinnfield | field | sapling<br>Tree | 1.32442651 | -0.105 | -0.074 | 2.08902784 | -0.92145836 |
| 473. | nMinnfield | field | sapling<br>Tree | 1.32555671 | -0.144 | -0.113 | 2.05160138 | -0.925128   |
| 474. | nMinnfield | field | sapling<br>Tree | 1.32565931 | -0.710 | -0.679 | 1.48574273 | -0.86945898 |
| 475. | nMinnfield | field | sapling<br>Tree | 1.33328602 | -0.365 | -0.334 | 1.83782018 | -1.02609711 |
| 476. | nMinnfield | field | sapling<br>Tree | 1.33391054 | -0.287 | -0.256 | 1.91739042 | -0.99619708 |
| 477. | nMinnfield | field | sapling<br>Tree | 1.34068202 | -0.498 | -0.467 | 1.71242131 | -1.20484116 |
| 478. | nMinnfield | field | sapling<br>Tree | 1.35351232 | -0.458 | -0.427 | 1.76588188 | -0.82873066 |
| 479. | nMinnfield | field | sapling<br>Tree | 1.35545152 | -0.117 | -0.086 | 2.1087103  | -0.83263599 |
| 480. | nMinnfield | field | sapling<br>Tree | 1.36163341 | -0.362 | -0.331 | 1.86973603 | -1.00755717 |
| 481. | nMinnfield | field | sapling<br>Tree | 1.36225622 | -0.376 | -0.345 | 1.85588843 | -0.96227796 |
| 482. | nMinnfield | field | sapling<br>Tree | 1.37421661 | -0.165 | -0.134 | 2.07939262 | -0.81778342 |
| 483. | nMinnfield | field | sapling<br>Tree | 1.38098866 | -0.309 | -0.278 | 1.9416917  | -0.81817756 |
| 484. | nMinnfield | field | sapling<br>Tree | 1.40052072 | -0.359 | -0.328 | 1.91107175 | -0.90231902 |
| 485. | nMinnfield | field | sapling<br>Tree | 1.43018797 | -0.625 | -0.594 | 1.67475442 | -0.85472181 |
| 486. | nMinnfield | field | sapling<br>Tree | 1.43396174 | -0.460 | -0.429 | 1.84360729 | -1.19266187 |
| 487. | nMinnfield | field | sapling<br>Tree | 1.44218178 | -0.379 | -0.348 | 1.93281695 | -0.9914867  |
| 488. | nMinnfield | field | sapling<br>Tree | 1.46874599 | -0.326 | -0.295 | 2.01243133 | -0.87053086 |
| 489. | nMinnfield | field | sapling<br>Tree | 1.46982202 | -0.294 | -0.263 | 2.04563889 | -0.93741162 |
| 490. | nMinnfield | field | sapling<br>Tree | 1.50749156 | -0.358 | -0.327 | 2.01931289 | -0.93241589 |

|      |            |       |         |            |        |        |            |             |
|------|------------|-------|---------|------------|--------|--------|------------|-------------|
| 491. | nMinnfield | field | Tree    | 1.51138865 | -0.256 | -0.225 | 2.12533851 | -0.75662854 |
| 492. | nMinnfield | field | sapling |            |        |        |            |             |
| 492. | nMinnfield | field | Tree    | 1.54709751 | -0.362 | -0.331 | 2.05505865 | -0.82016739 |
| 493. | nMinnfield | field | sapling |            |        |        |            |             |
| 493. | nMinnfield | field | Tree    | 1.55286281 | -0.202 | -0.171 | 2.22063918 | -0.78089142 |
| 494. | nMinnfield | field | sapling |            |        |        |            |             |
| 494. | nMinnfield | field | Tree    | 1.57047289 | -0.118 | -0.087 | 2.32278234 | -0.71540844 |
| 495. | nMinnfield | field | sapling |            |        |        |            |             |
| 495. | nMinnfield | field | Tree    | 1.57706649 | -0.392 | -0.361 | 2.05497158 | -0.9004036  |
| 496. | nMinnfield | field | sapling |            |        |        |            |             |
| 496. | nMinnfield | field | Tree    | 1.58344817 | -0.240 | -0.209 | 2.21356299 | -0.64394985 |
| 497. | nMinnfield | field | sapling |            |        |        |            |             |
| 497. | nMinnfield | field | Tree    | 1.58566373 | -0.377 | -0.346 | 2.07831735 | -0.80851433 |
| 498. | nMinnfield | field | sapling |            |        |        |            |             |
| 498. | nMinnfield | field | Tree    | 1.58868619 | -0.361 | -0.330 | 2.09760736 | -0.68029259 |
| 499. | nMinnfield | field | sapling |            |        |        |            |             |
| 499. | nMinnfield | field | Tree    | 1.59802407 | -0.278 | -0.247 | 2.18957808 | -0.60291814 |
| 500. | nMinnfield | field | sapling |            |        |        |            |             |
| 500. | nMinnfield | field | Tree    | 1.60829064 | -0.402 | -0.371 | 2.07606599 | -0.81549624 |
| 501. | nMinnfield | field | sapling |            |        |        |            |             |
| 501. | nMinnfield | field | Tree    | 1.61263554 | -0.355 | -0.324 | 2.12757022 | -0.89936758 |
| 502. | nMinnfield | field | sapling |            |        |        |            |             |
| 502. | nMinnfield | field | Tree    | 1.63157566 | -0.245 | -0.214 | 2.25628576 | -0.70316376 |
| 503. | nMinnfield | field | sapling |            |        |        |            |             |
| 503. | nMinnfield | field | Tree    | 1.66304097 | -0.439 | -0.408 | 2.09422438 | -0.79105638 |
| 504. | nMinnfield | field | sapling |            |        |        |            |             |
| 504. | nMinnfield | field | Tree    | 1.67717792 | -0.210 | -0.179 | 2.33673652 | -0.74787994 |
| 505. | nMinnfield | field | sapling |            |        |        |            |             |
| 505. | nMinnfield | field | Tree    | 1.68819728 | -0.455 | -0.424 | 2.1036367  | -0.8177977  |
| 506. | nMinnfield | field | sapling |            |        |        |            |             |
| 506. | nMinnfield | field | Tree    | 1.69642629 | -0.341 | -0.310 | 2.22539861 | -0.67803495 |
| 507. | nMinnfield | field | sapling |            |        |        |            |             |
| 507. | nMinnfield | field | Tree    | 1.70176652 | -0.404 | -0.373 | 2.16735069 | -0.66660916 |
| 508. | nMinnfield | field | sapling |            |        |        |            |             |
| 508. | nMinnfield | field | Tree    | 1.72309429 | -0.194 | -0.163 | 2.39860469 | -0.52143091 |
| 509. | nMinnfield | field | sapling |            |        |        |            |             |
| 509. | nMinnfield | field | Tree    | 1.72331608 | -0.208 | -0.177 | 2.38515128 | -0.66134135 |
| 510. | nMinnfield | field | sapling |            |        |        |            |             |
| 510. | nMinnfield | field | Tree    | 1.73602979 | -0.464 | -0.433 | 2.14153389 | -0.82418142 |
| 511. | nMinnfield | field | sapling |            |        |        |            |             |
| 511. | nMinnfield | field | Tree    | 1.7393587  | -0.077 | -0.046 | 2.53193406 | -0.57054505 |
| 512. | nMinnfield | field | sapling |            |        |        |            |             |
| 512. | nMinnfield | field | Tree    | 1.79049628 | -0.332 | -0.301 | 2.32883208 | -0.53474671 |
| 513. | nMinnfield | field | sapling |            |        |        |            |             |
| 513. | nMinnfield | field | Tree    | 1.81081701 | -0.319 | -0.288 | 2.36148938 | -0.47885106 |
| 514. | nMinnfield | field | sapling |            |        |        |            |             |
| 514. | nMinnfield | field | Tree    | 1.85912628 | -0.121 | -0.090 | 2.60787362 | -0.39819654 |
| 515. | nMinnfield | field | sapling |            |        |        |            |             |
| 515. | nMinnfield | field | Tree    | 1.88266112 | -0.253 | -0.222 | 2.49998549 | -0.40013602 |
| 516. | nMinnfield | field | sapling |            |        |        |            |             |
| 516. | nMinnfield | field | Tree    | 1.89420526 | -0.140 | -0.109 | 2.62430539 | -0.37742097 |
| 517. | nMinnfield | field | sapling |            |        |        |            |             |
| 517. | nMinnfield | field | Tree    | 1.89685677 | -0.412 | -0.381 | 2.35498493 | -0.5182181  |
| 518. | nMinnfield | field | sapling |            |        |        |            |             |
| 518. | nMinnfield | field | Tree    | 1.91324678 | -0.203 | -0.172 | 2.57979171 | -0.33577852 |
| 519. | nMinnfield | field | sapling |            |        |        |            |             |
| 519. | nMinnfield | field | Tree    | 1.93577421 | -0.033 | -0.002 | 2.77266111 | -0.20793394 |
| 520. | nMinnfield | field | sapling |            |        |        |            |             |
| 520. | nMinnfield | field | Tree    | 1.96056115 | -0.315 | -0.284 | 2.51509318 | -0.29166027 |
| 521. | nMinnfield | field | sapling |            |        |        |            |             |
| 521. | nMinnfield | field | Tree    | 1.97800238 | -0.313 | -0.282 | 2.53450929 | -0.26178161 |
| 522. | nMinnfield | field | sapling |            |        |        |            |             |
| 522. | nMinnfield | field | Tree    | 1.98298542 | -0.156 | -0.125 | 2.69663405 | -0.22159382 |

|      |            |       |                 |            |        |        |            |             |
|------|------------|-------|-----------------|------------|--------|--------|------------|-------------|
| 523. | nMinnfield | field | sapling<br>Tree | 1.99044986 | -0.312 | -0.281 | 2.54818658 | -0.44549424 |
| 524. | nMinnfield | field | sapling<br>Tree | 2.06256694 | -0.267 | -0.236 | 2.66546565 | -0.37271184 |
| 525. | nMinnfield | field | sapling<br>Tree | 2.21065555 | -0.257 | -0.226 | 2.82378208 | -0.06926812 |
| 526. | nMinnfield | field | sapling<br>Tree | 2.25967987 | -0.147 | -0.116 | 2.98309432 | 0.06698295  |
| 527. | nMinnfield | field | sapling<br>Tree | 2.31813432 | -0.213 | -0.182 | 2.97524473 | 0.10239417  |
| 528. | nMinnfield | field | sapling<br>Tree | 2.3205513  | -0.257 | -0.226 | 2.93353954 | 0.04923508  |
| 529. | nMinnfield | field | sapling<br>Tree | 2.34242702 | -0.394 | -0.363 | 2.81836986 | 0.02557341  |
| 530. | nMinnfield | field | sapling<br>Tree | 2.3582357  | -0.078 | -0.047 | 3.15016735 | 0.07073226  |
| 531. | nMinnfield | field | sapling<br>Tree | 2.38842804 | -0.172 | -0.141 | 3.08653488 | 0.21417073  |
| 532. | nMinnfield | field | sapling<br>Tree | 2.41218157 | -0.037 | -0.006 | 3.24563513 | 0.15472559  |
| 533. | nMinnfield | field | sapling<br>Tree | 2.41360819 | -0.084 | -0.053 | 3.1997201  | 0.09886431  |
| 534. | nMinnfield | field | sapling<br>Tree | 2.58421019 | -0.262 | -0.231 | 3.19178557 | 0.29602174  |
| 535. | nMinnfield | field | sapling<br>Tree | 2.61122821 | -0.214 | -0.183 | 3.26772626 | 0.33151245  |
| 536. | nMinnfield | field | sapling<br>Tree | 2.67995364 | -0.102 | -0.071 | 3.44751068 | 0.45422995  |
| 537. | nMinnfield | field | sapling<br>Tree | 2.74517242 | -0.165 | -0.134 | 3.44979971 | 0.54203771  |

---
